# Supplementary material for: Does thermotropic liquid crystalline self-assembly control biological activity in amphiphilic amino acids? – tyrosine ILCs as a case study
Source: Royal Society of Chemistry journal article supplement (doi:10.1039/d3cp00485f), 2023-01-01

## Supporting Information

### **Does thermotropic liquid crystalline self-assembly control biological activity in amphiphilic amino acids? – Tyrosine ILCs as a case study**

Marco André Grunwald,<sup>a</sup> Selina Emilie Hagenlocher<sup>¶,a</sup>, Larissa Turkanovic<sup>¶,a</sup>, Soeren Magnus Bauch,<sup>a</sup> Sebastian Benedikt Wachsmann,<sup>a</sup> Luca Alexa Altevogt,<sup>a</sup> Max Ebert,<sup>a</sup> Julius Agamemnon Knöller,<sup>a</sup> Aileen Rebecca Raab,<sup>a</sup> Finn Schulz,<sup>a</sup> Mohamed A. Kolmangadi,<sup>b</sup> Anna Zens,<sup>a</sup> Patrick Huber,<sup>c</sup> Andreas Schönhals,<sup>b</sup> Ursula Bilitewski<sup>\*d</sup> and Sabine Laschat<sup>ID\*a</sup>

<sup>a</sup> *Institut für Organische Chemie, Universität Stuttgart, Pfaffenwaldring 55, D-70569 Stuttgart, Germany*

<sup>b</sup> *Bundesanstalt für Materialforschung und –prüfung (BAM), D-12205 Berlin, Germany. E-mail: andreas.schoenhals@bam.de*

<sup>c</sup> *Institute for Materials and X-Ray Physics, Hamburg University of Technology, D-21073 Hamburg, Germany; Centre for X-ray and Nano Science CXNS, Deutsches Elektronen-Synchrotron DESY, D-22605 Hamburg; Centre for Hybrid Nanostructures ChyN, University Hamburg, D-21073 Hamburg, Germany, E-mail: patrick.huber@tuhh.de*

<sup>d</sup> *AG Compound Profiling and Screening, Helmholtz Zentrum für Infektionsforschung, Inhoffenstr. 7, D-38124 Braunschweig, Germany. E-mail: ursula.bilitewski@helmholtz-hzi.de*

<sup>¶</sup> *Contributed equally to this work*

3,4-CO<sub>2</sub>Et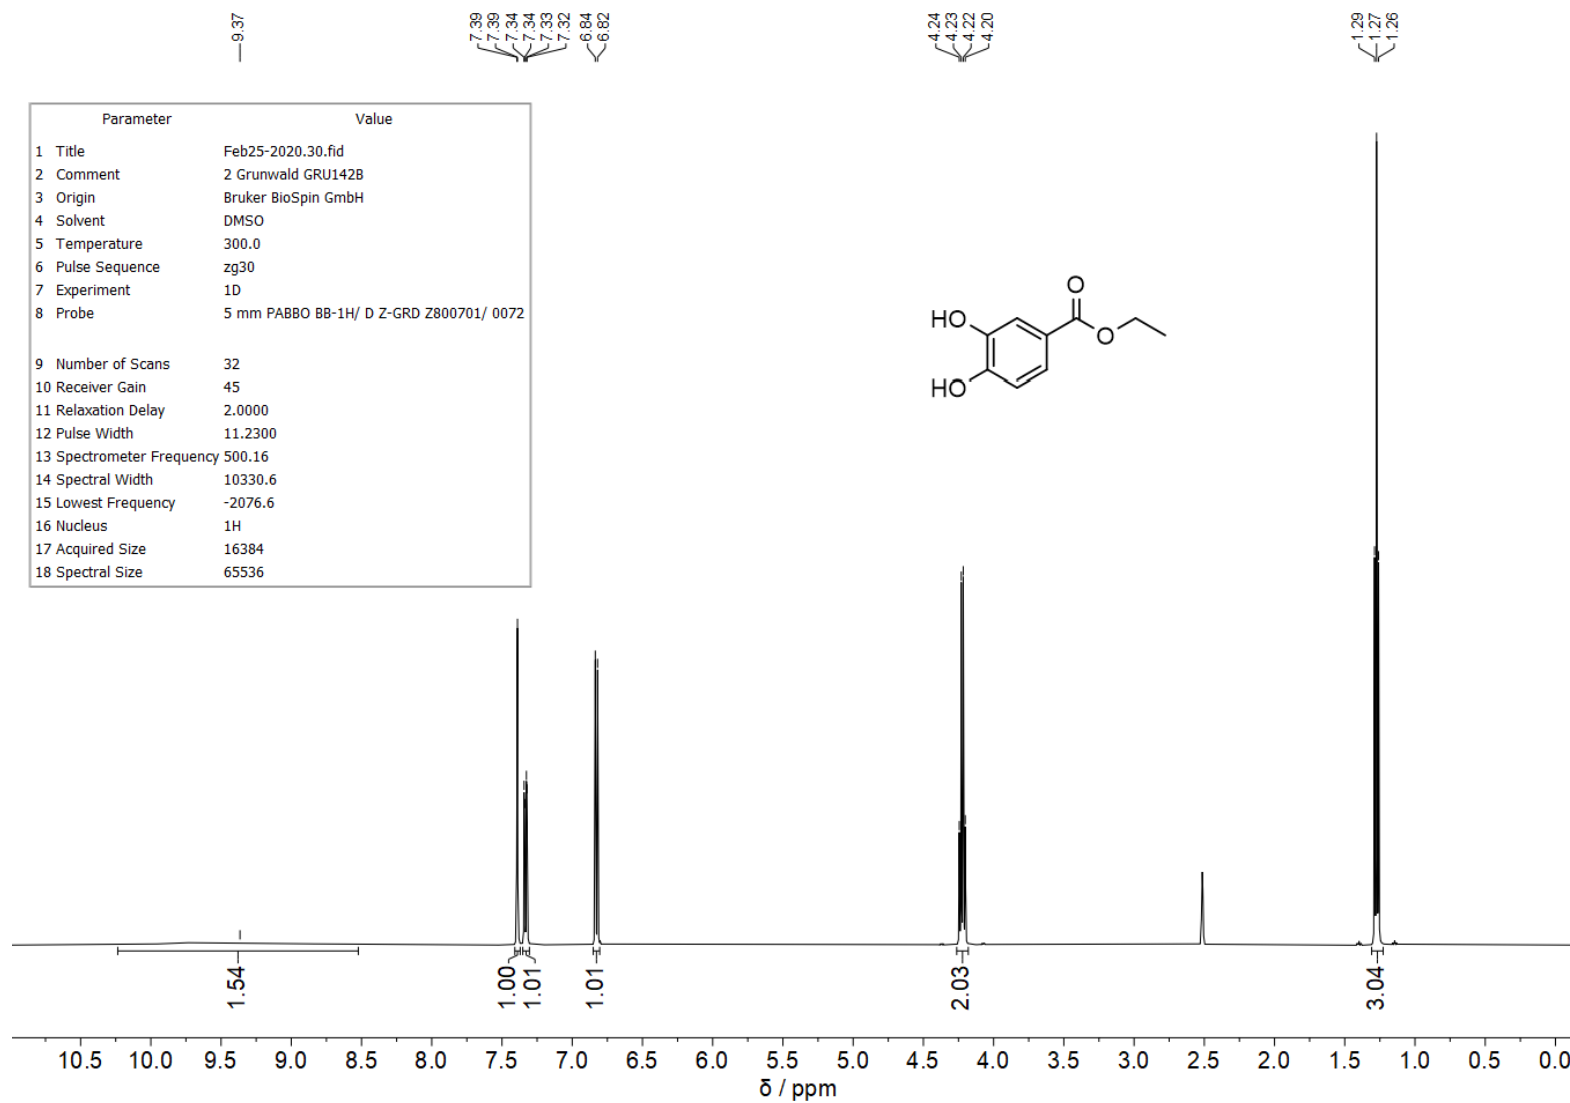

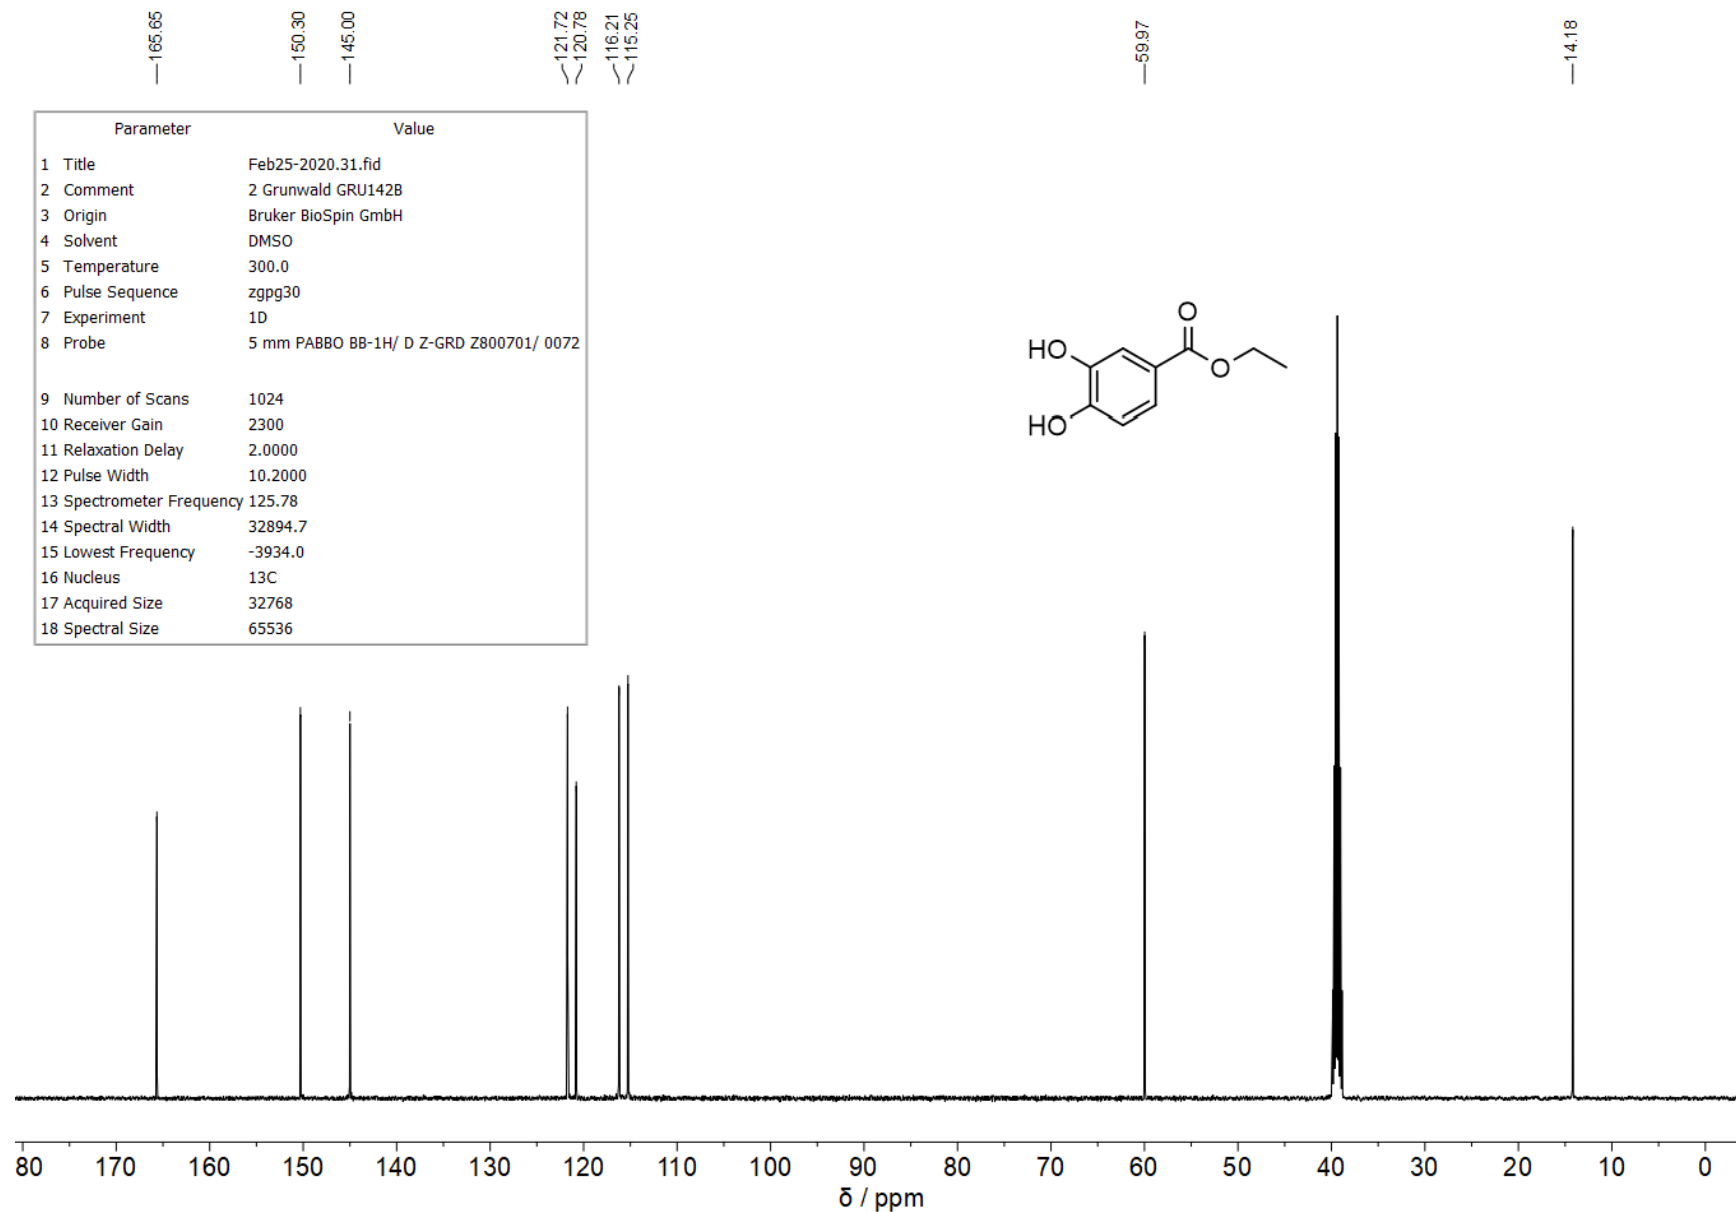

3,5-CO<sub>2</sub>Me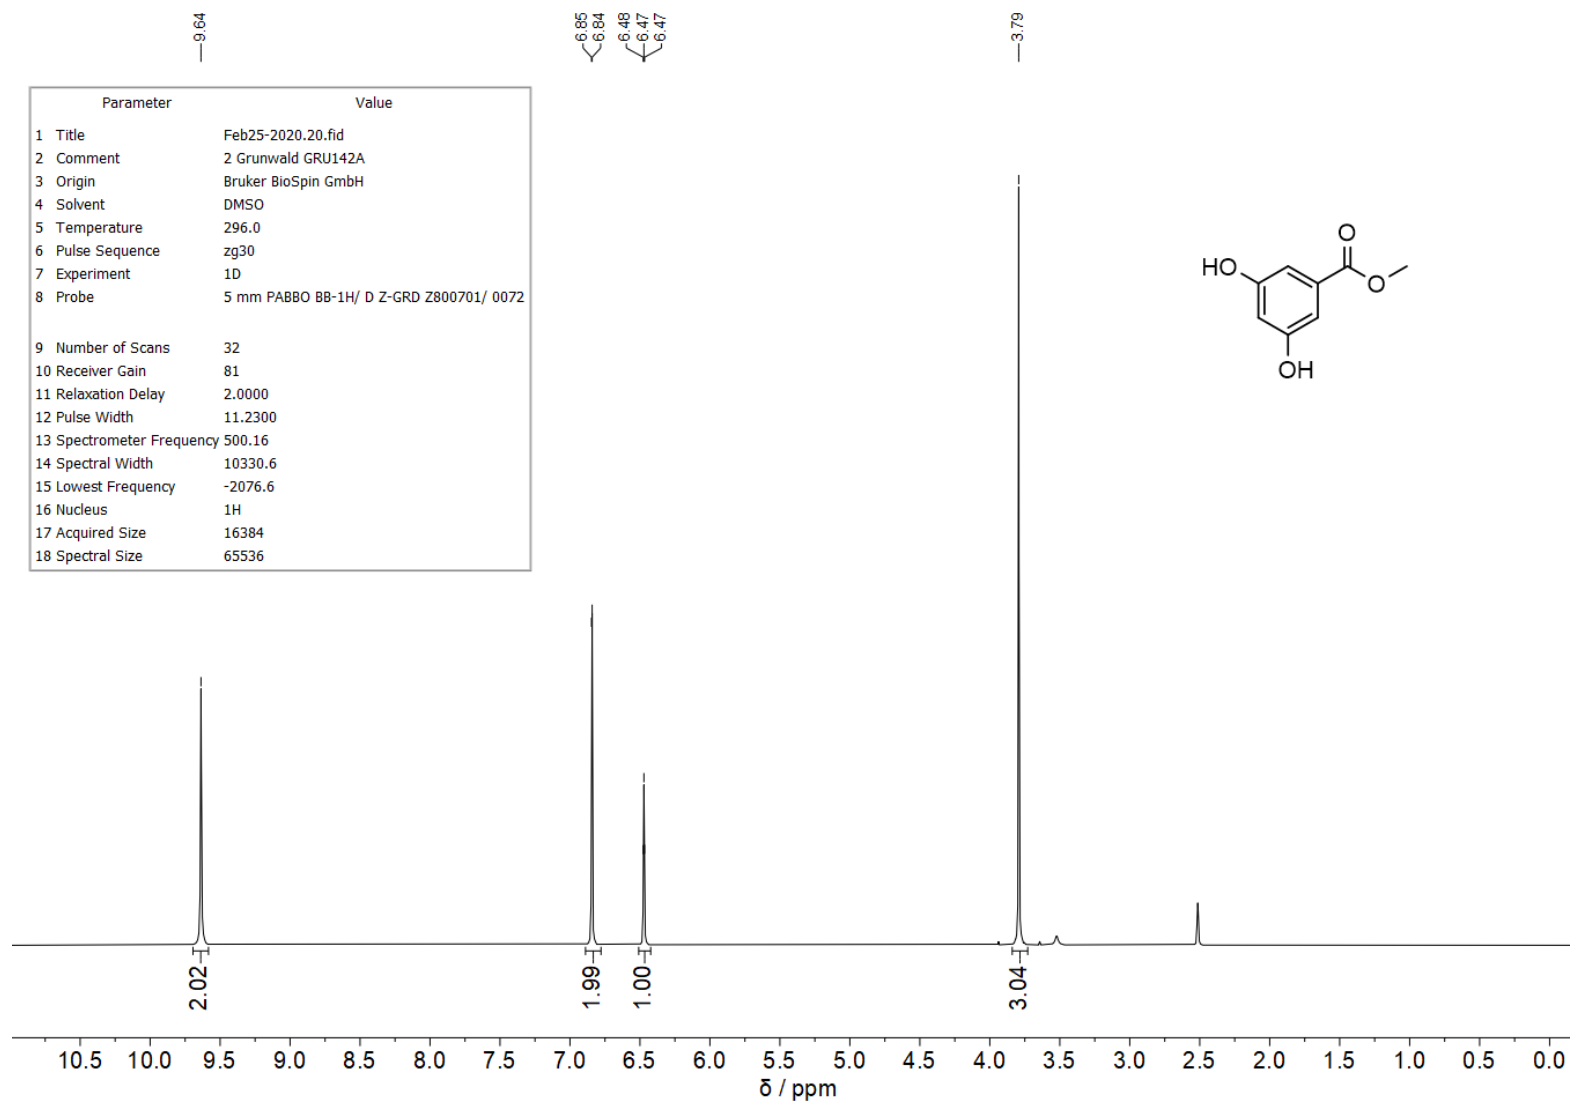

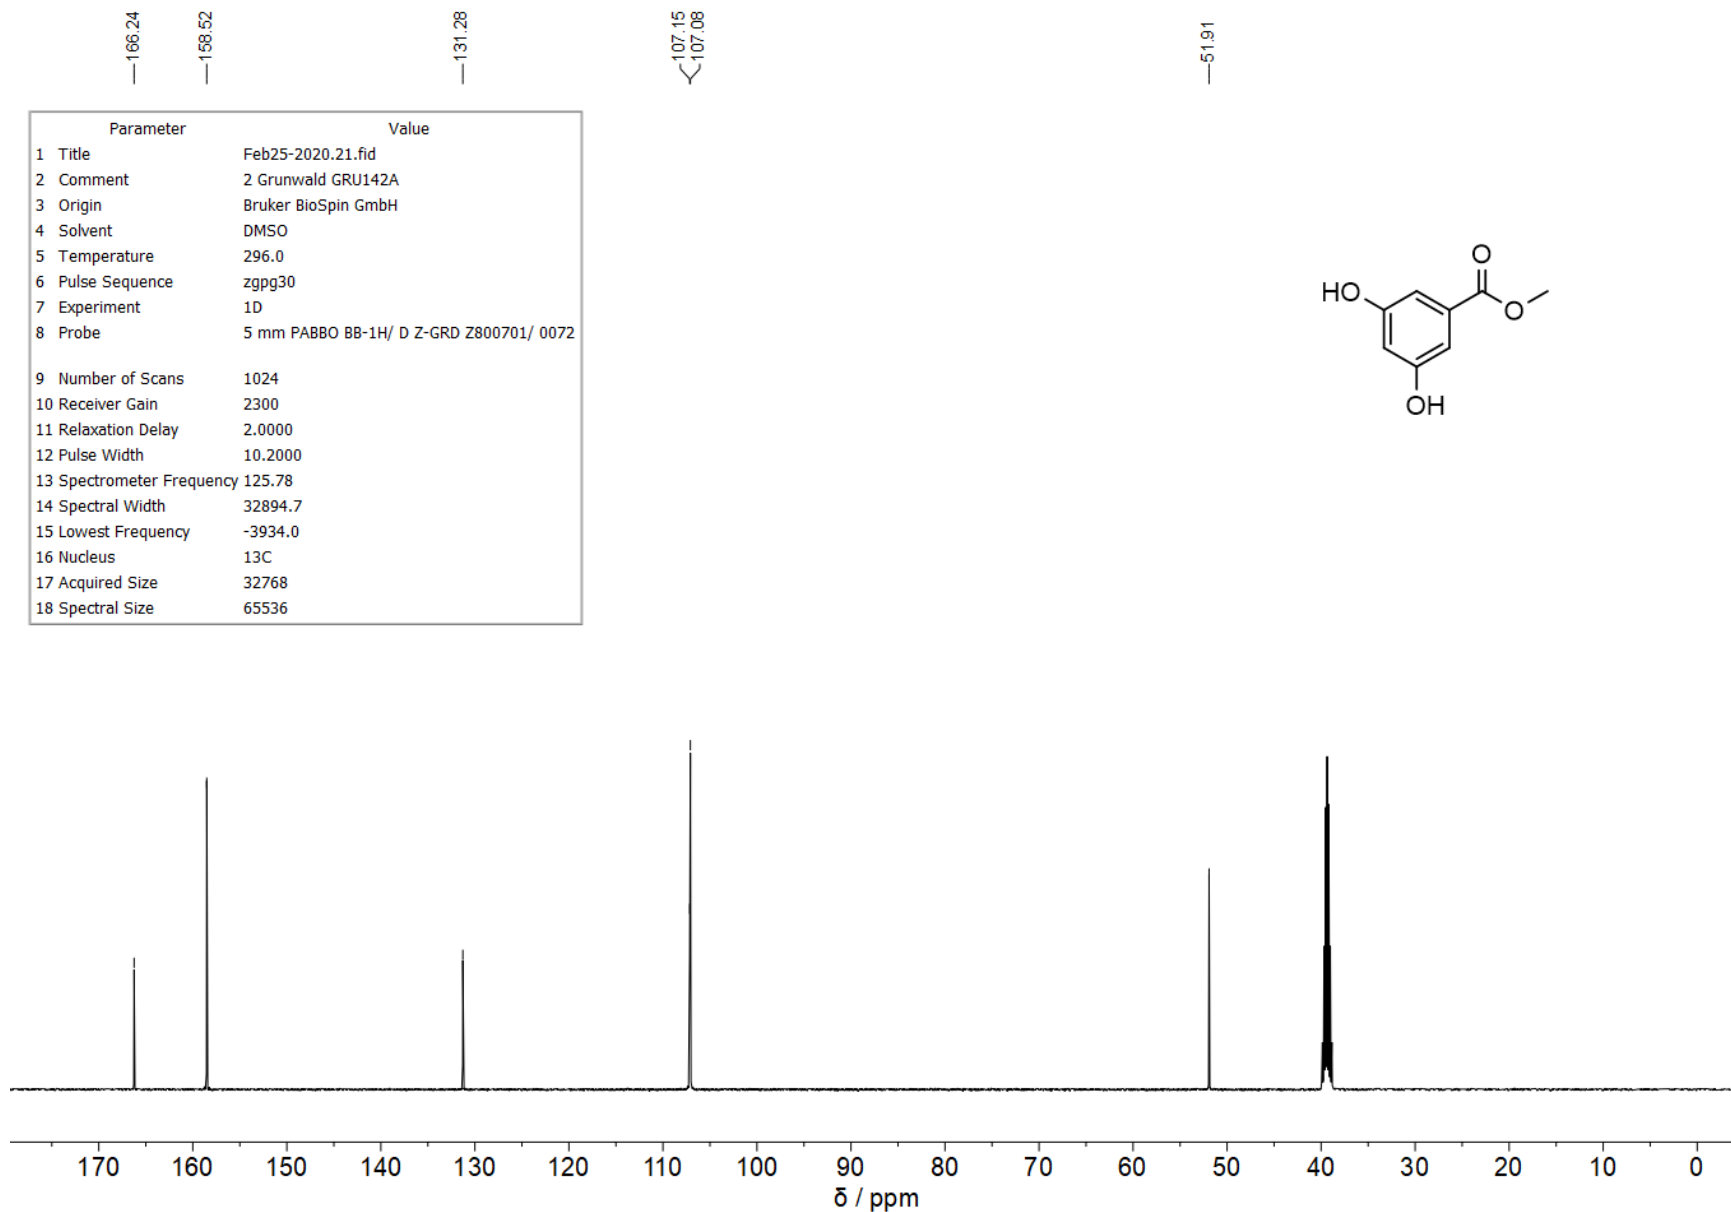

4-C<sub>10</sub>CO<sub>2</sub>Me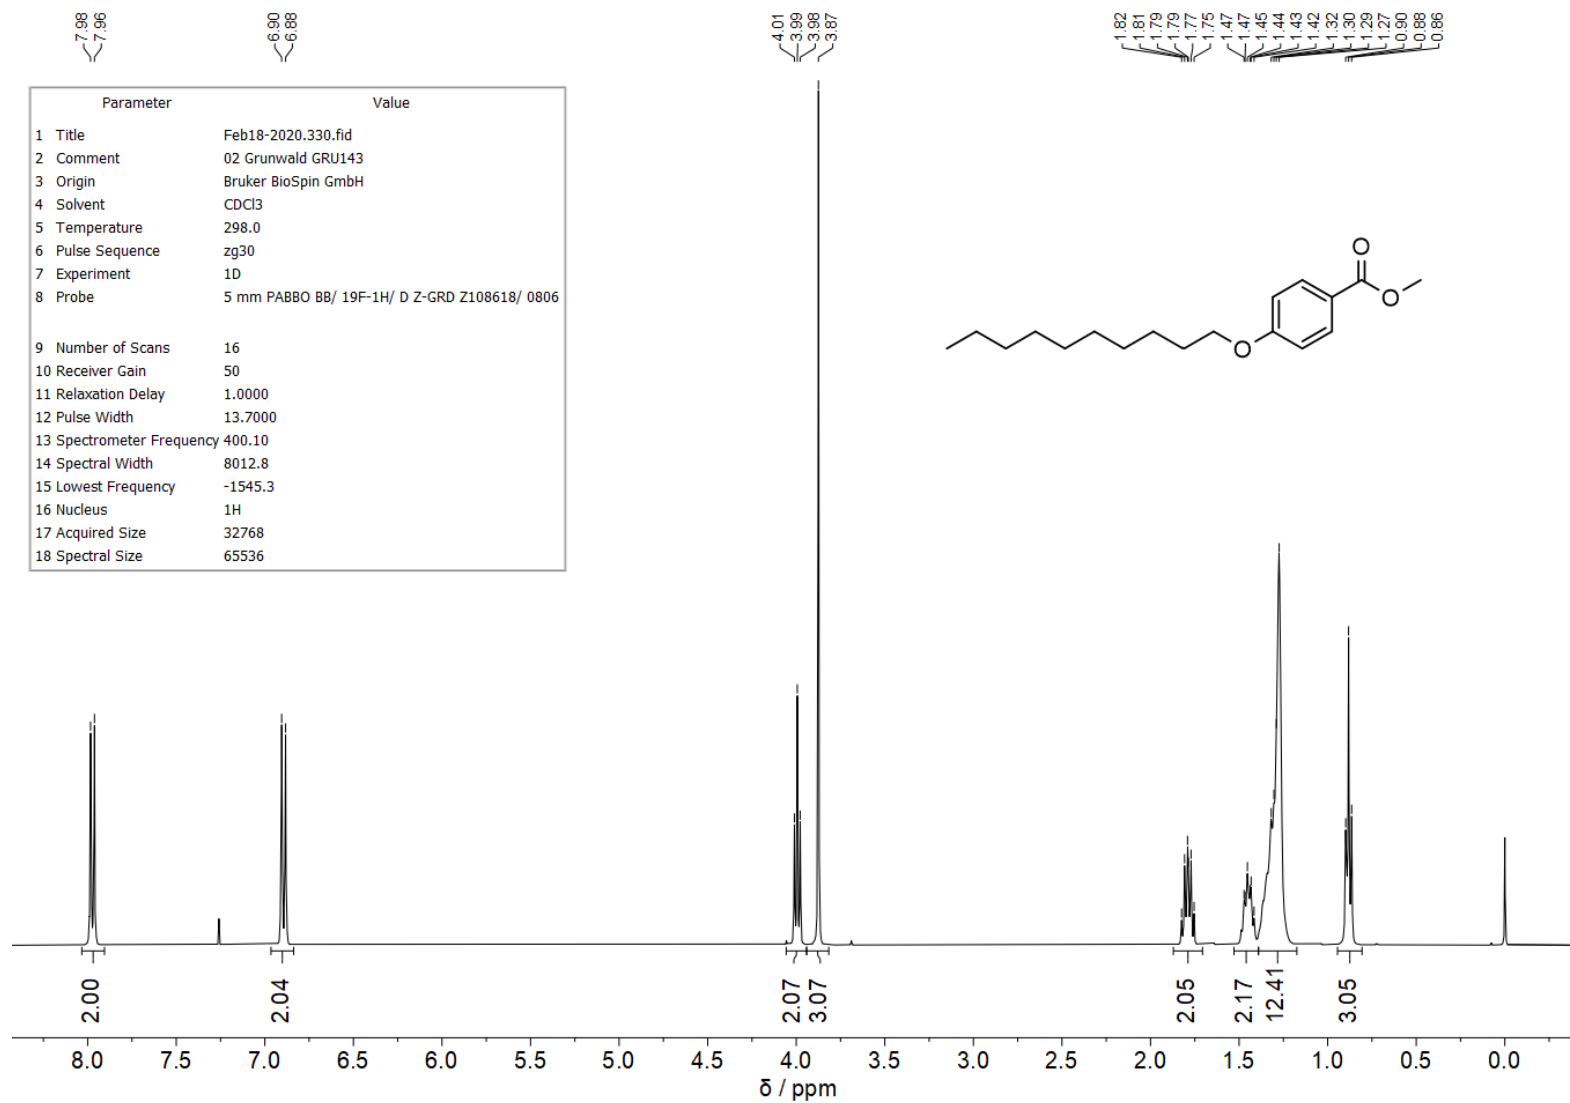

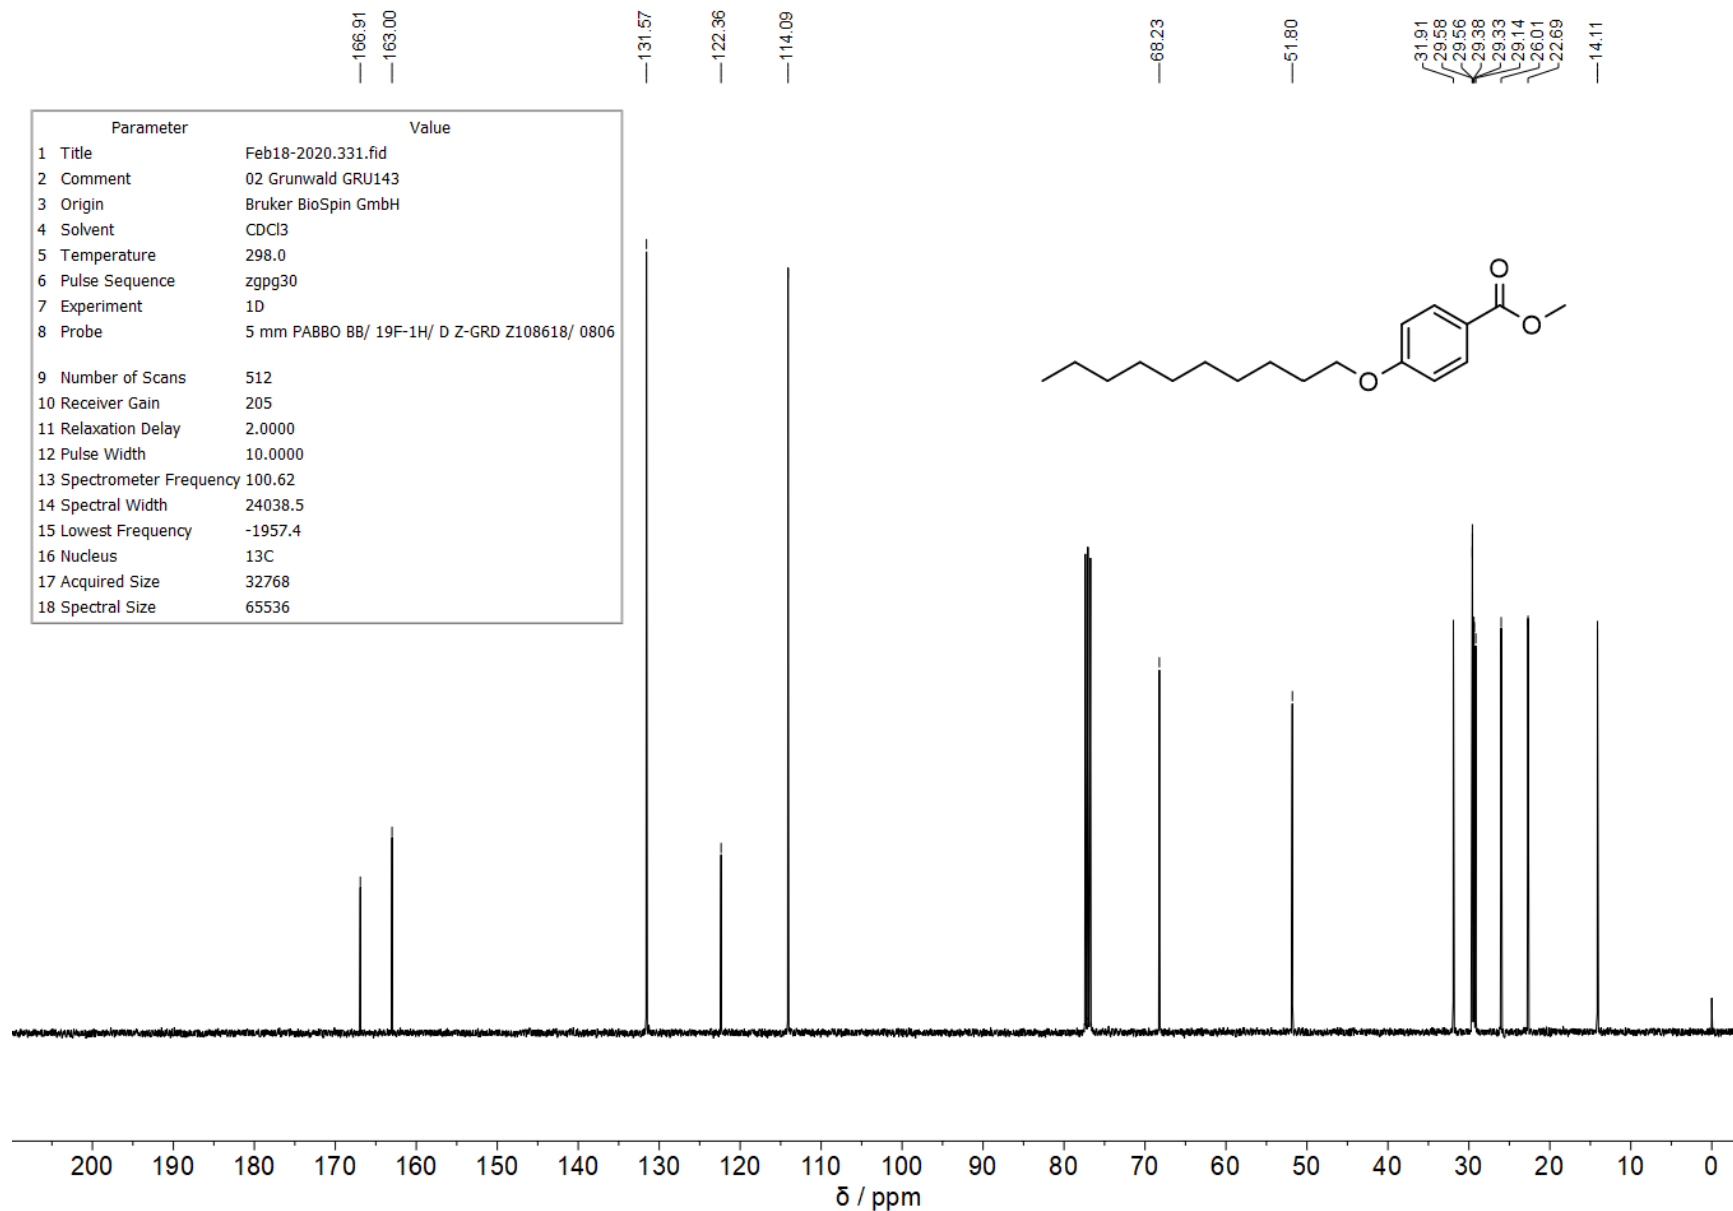

4-C<sub>12</sub>CO<sub>2</sub>Me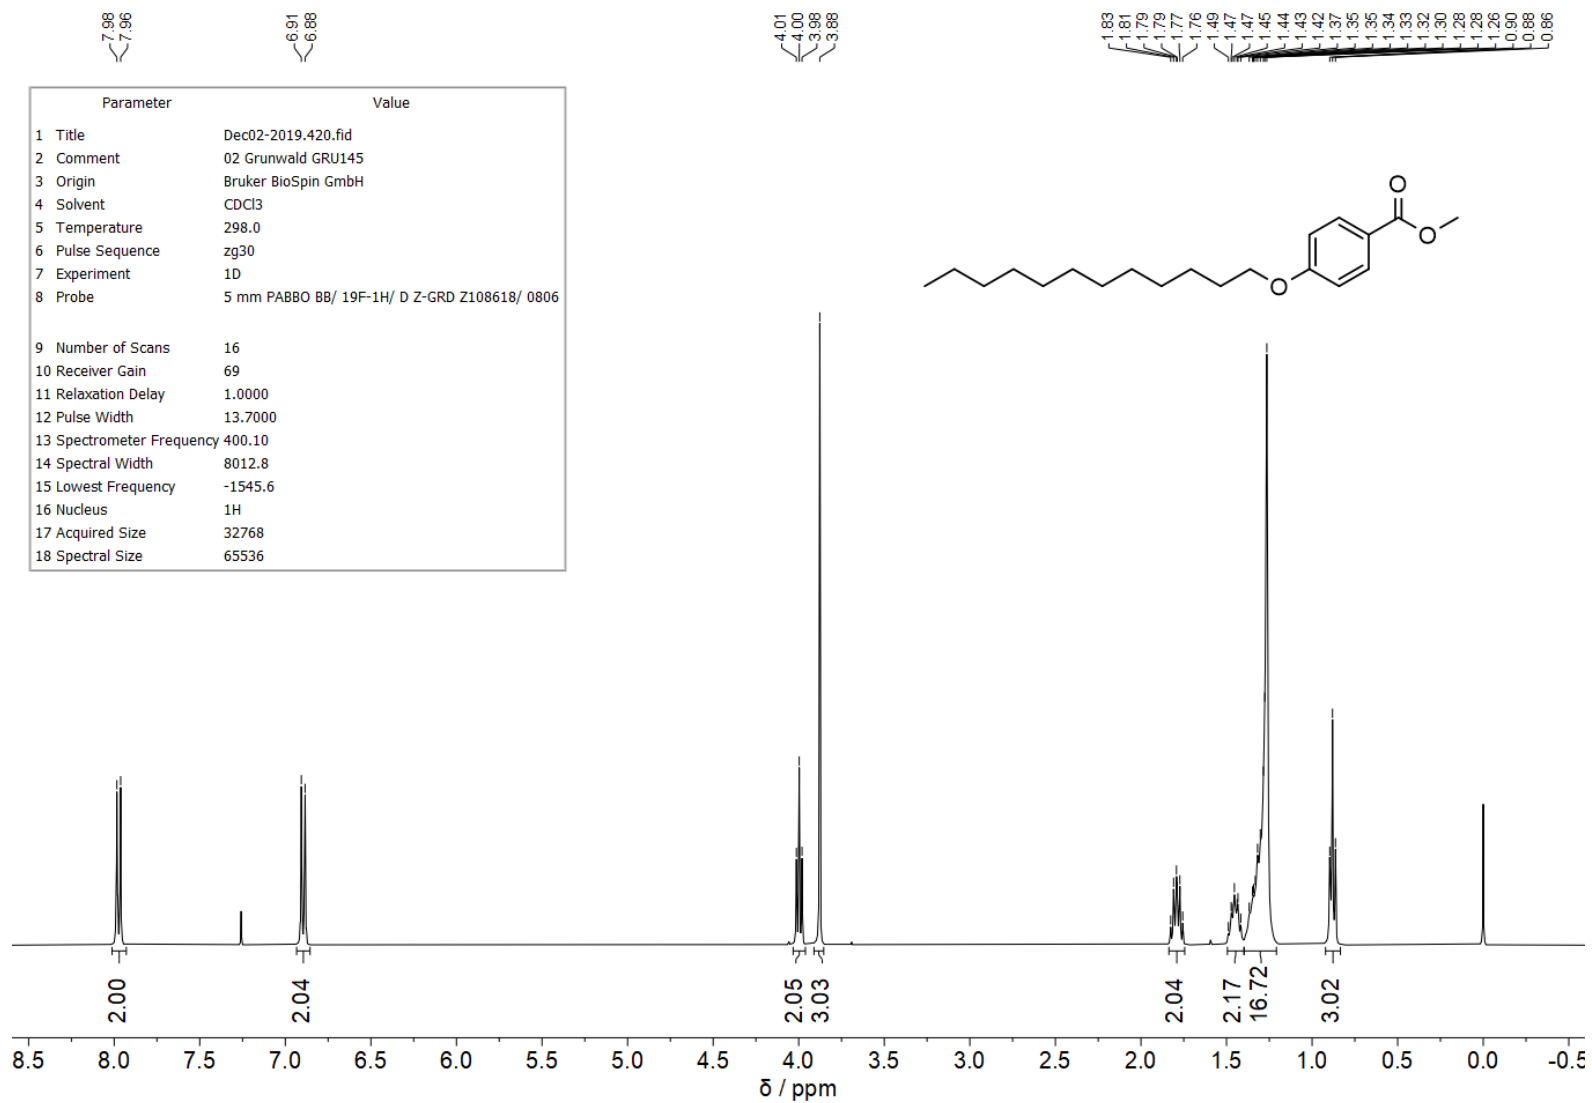



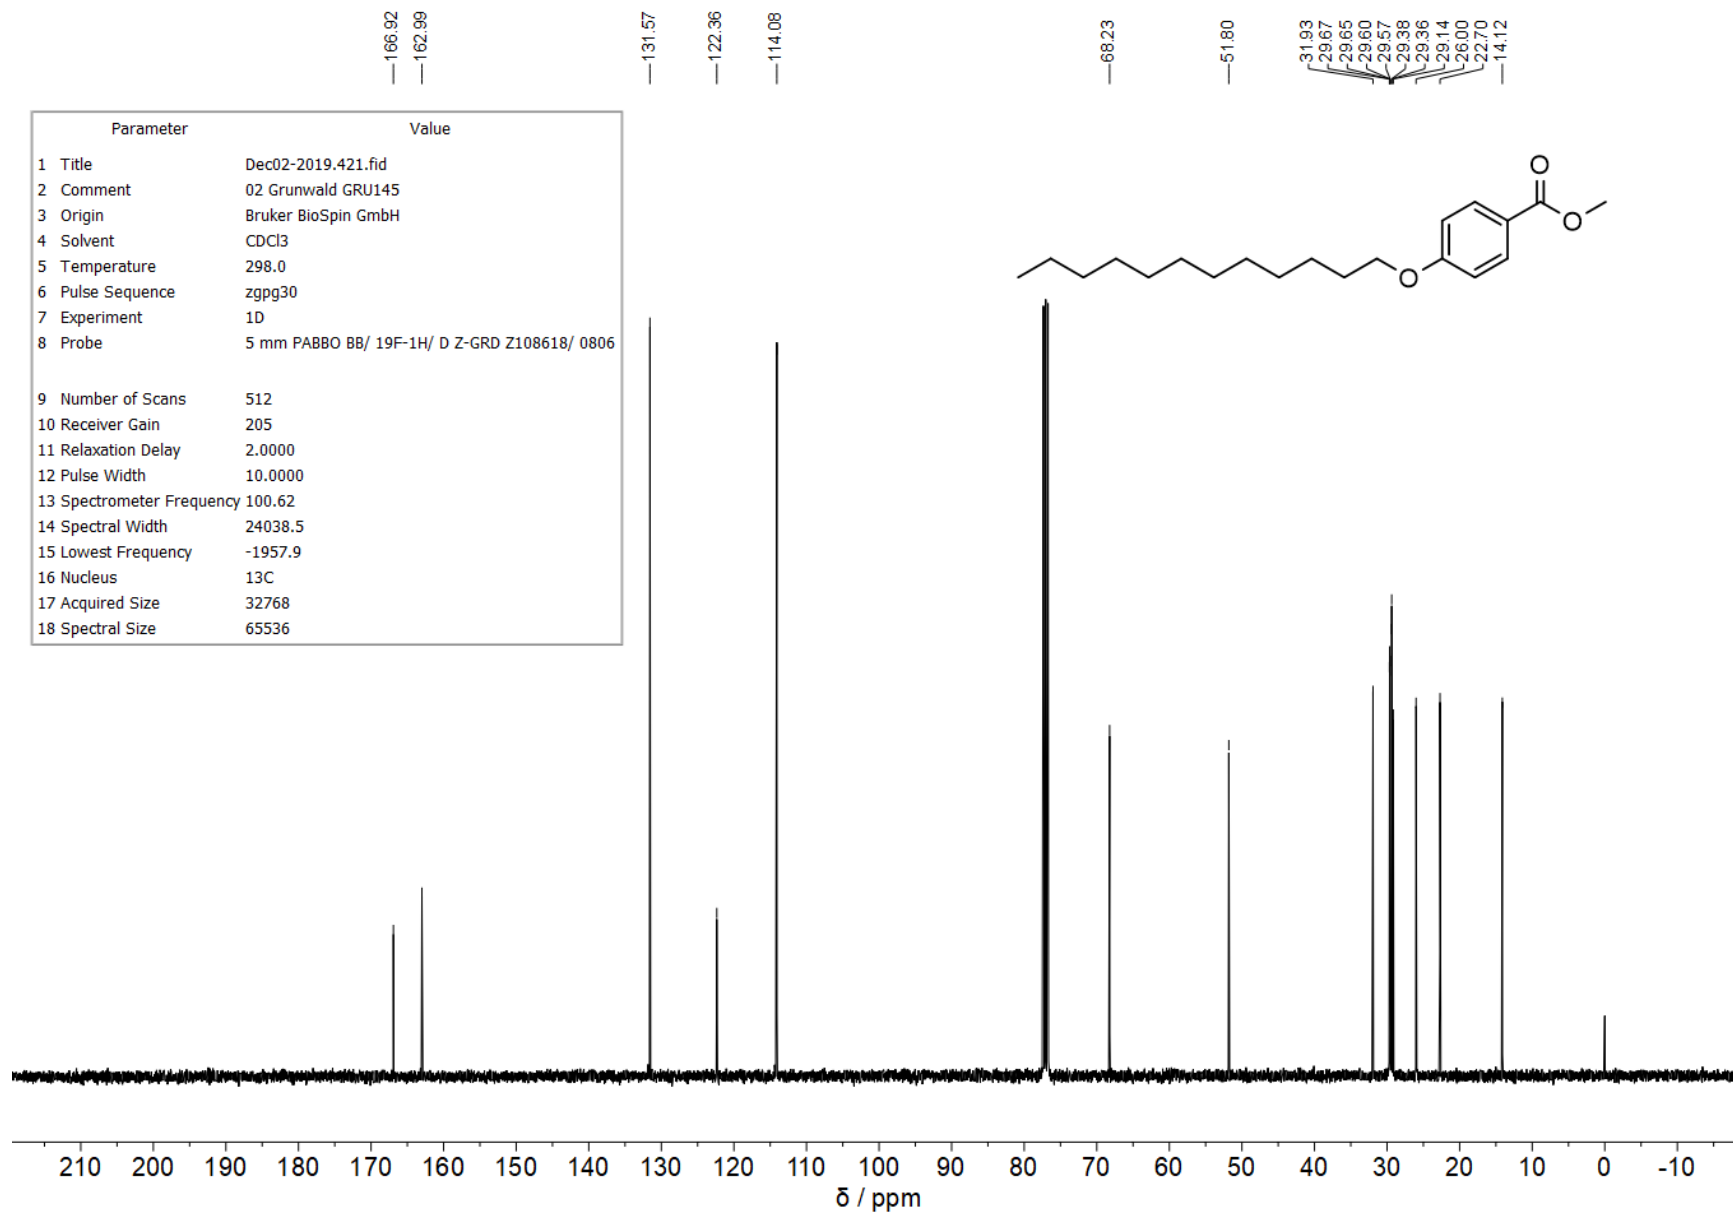

4-C<sup>14</sup>CO<sub>2</sub>Me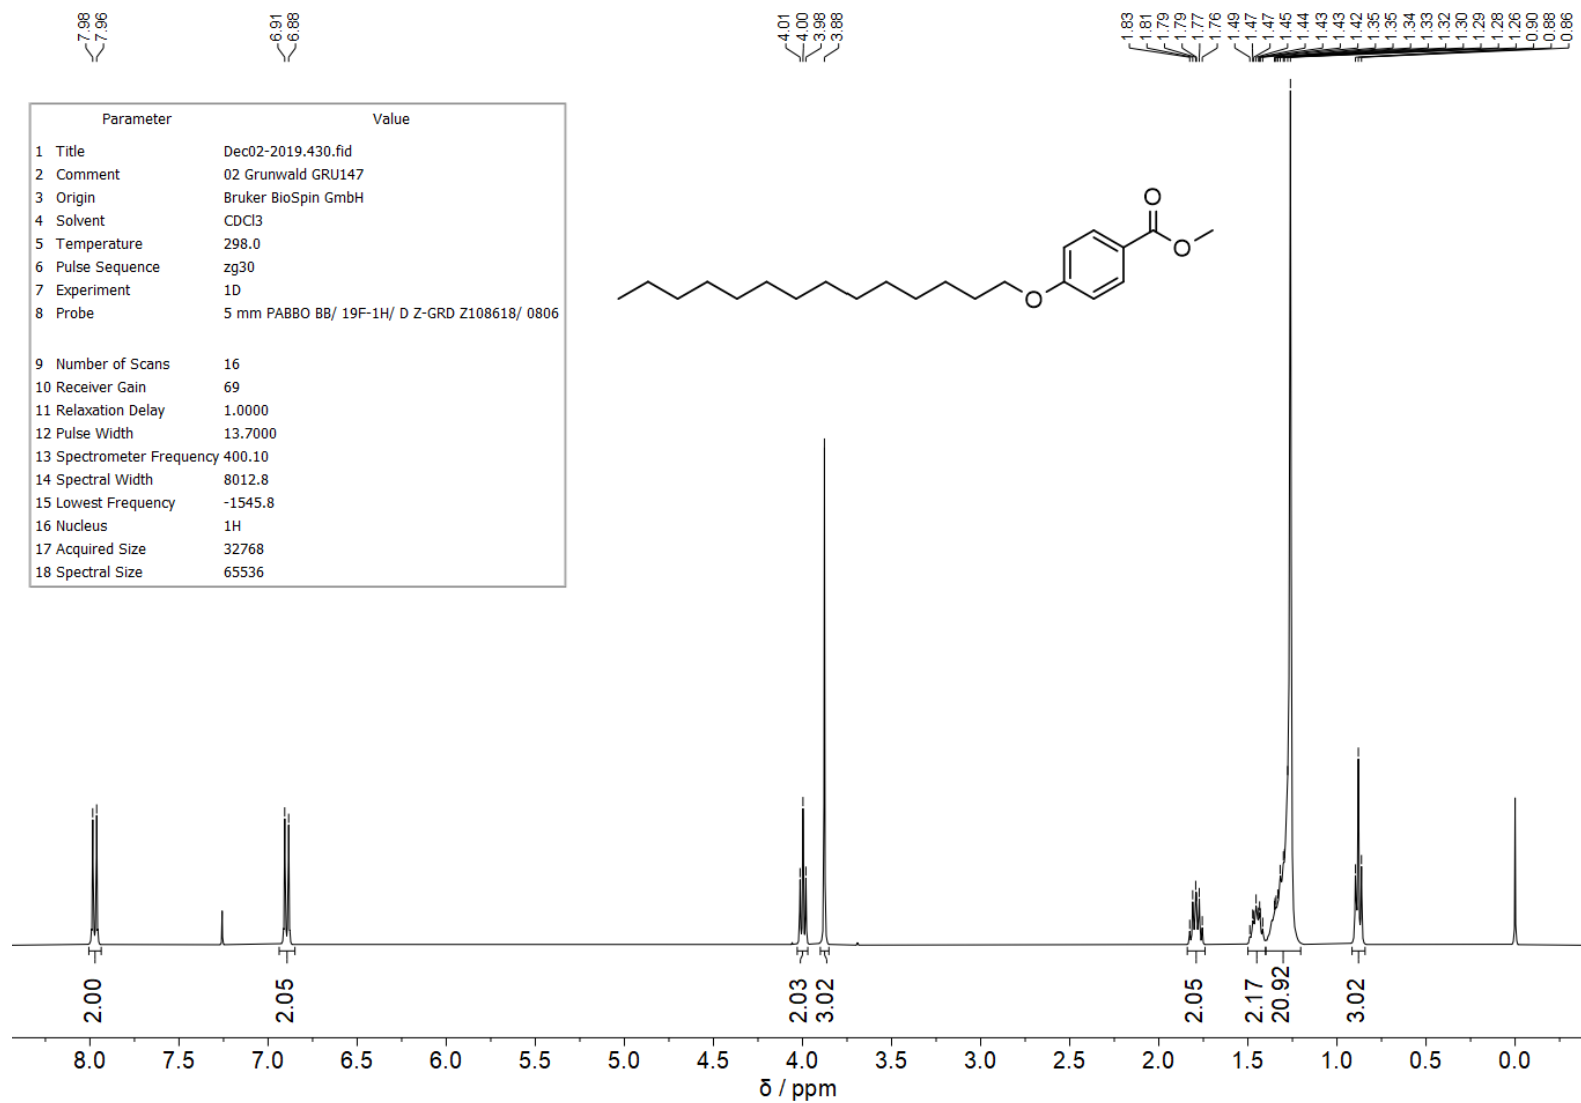

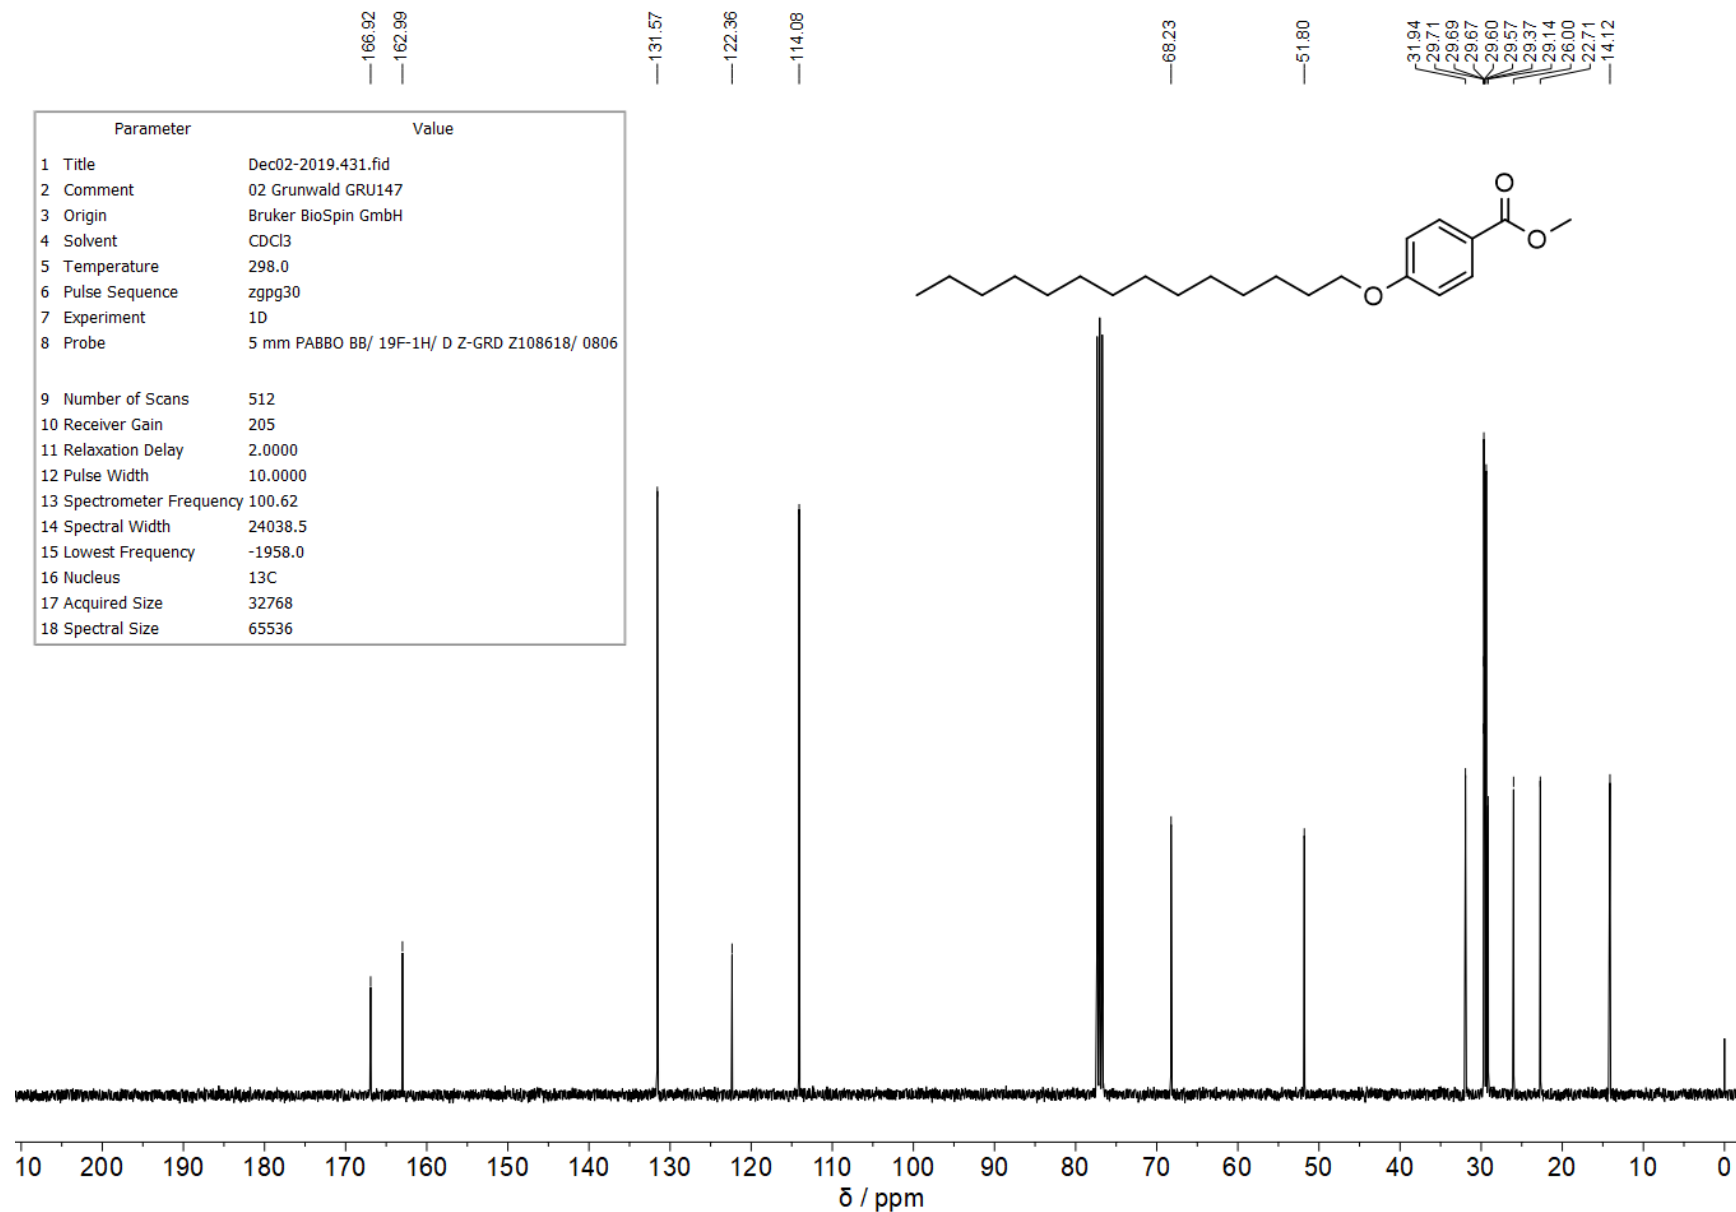

3,4-C<sub>10</sub>CO<sub>2</sub>Et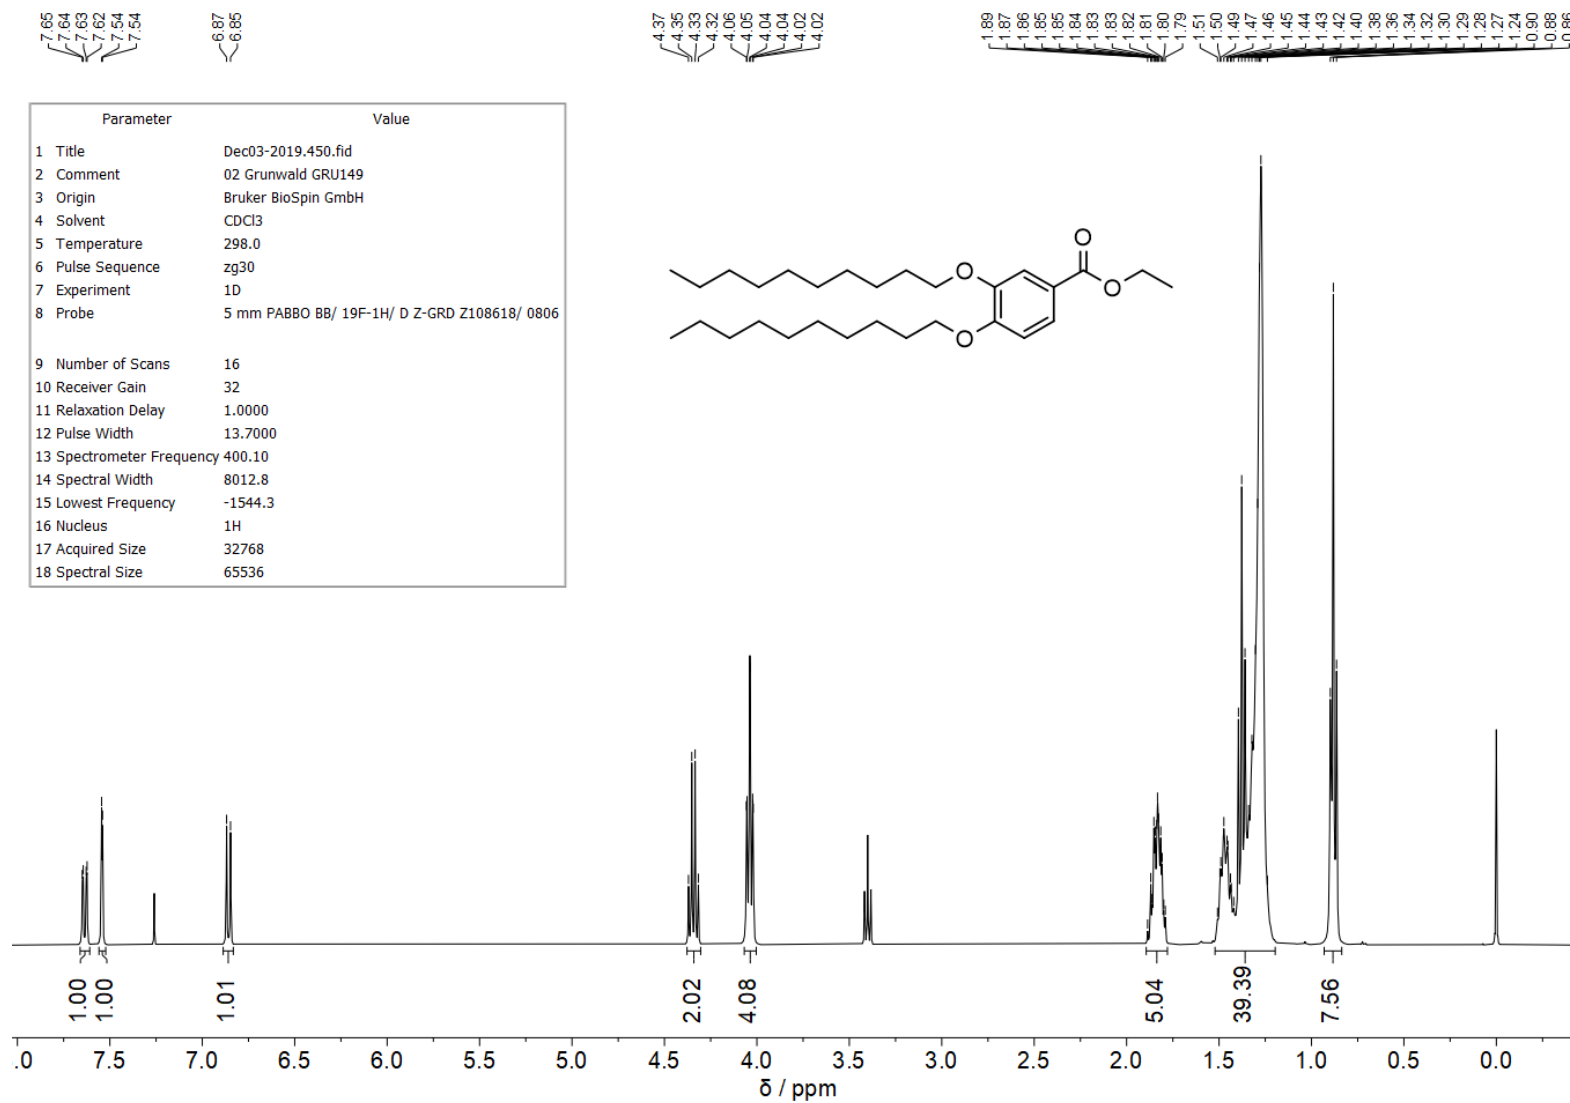

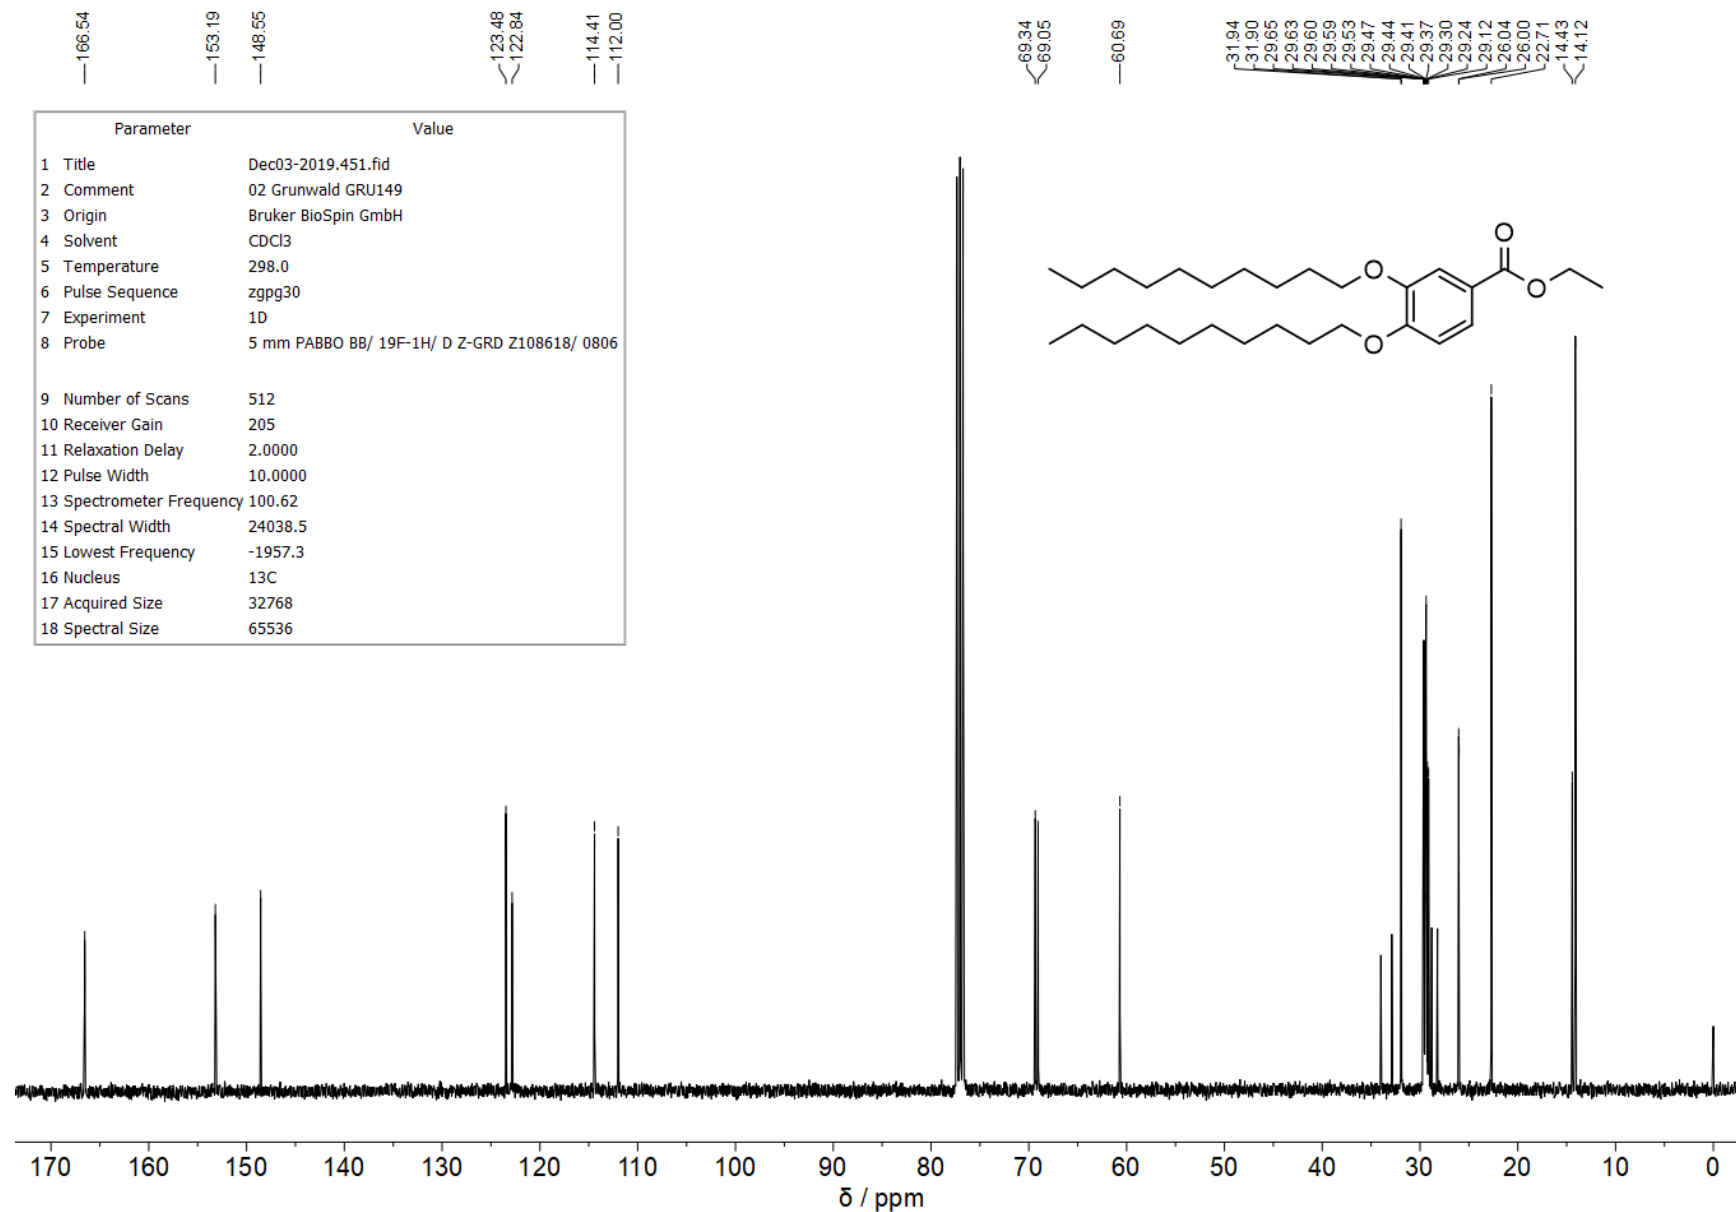

3,4-C<sub>12</sub>CO<sub>2</sub>Et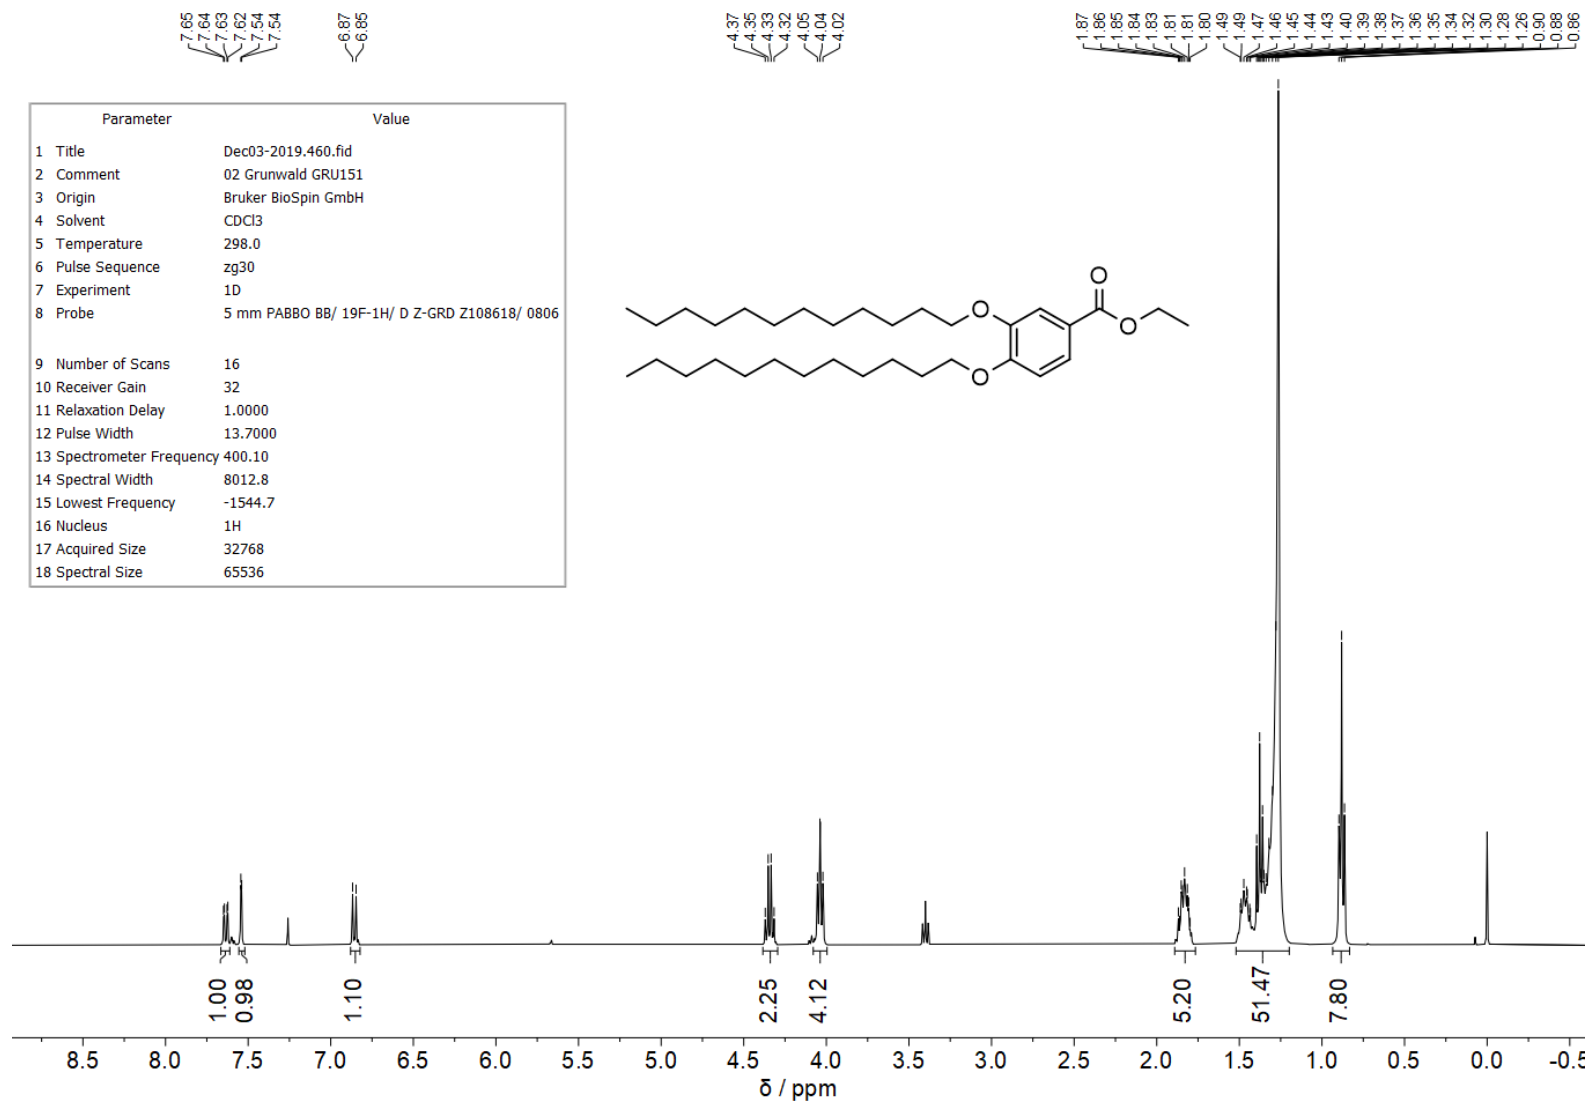

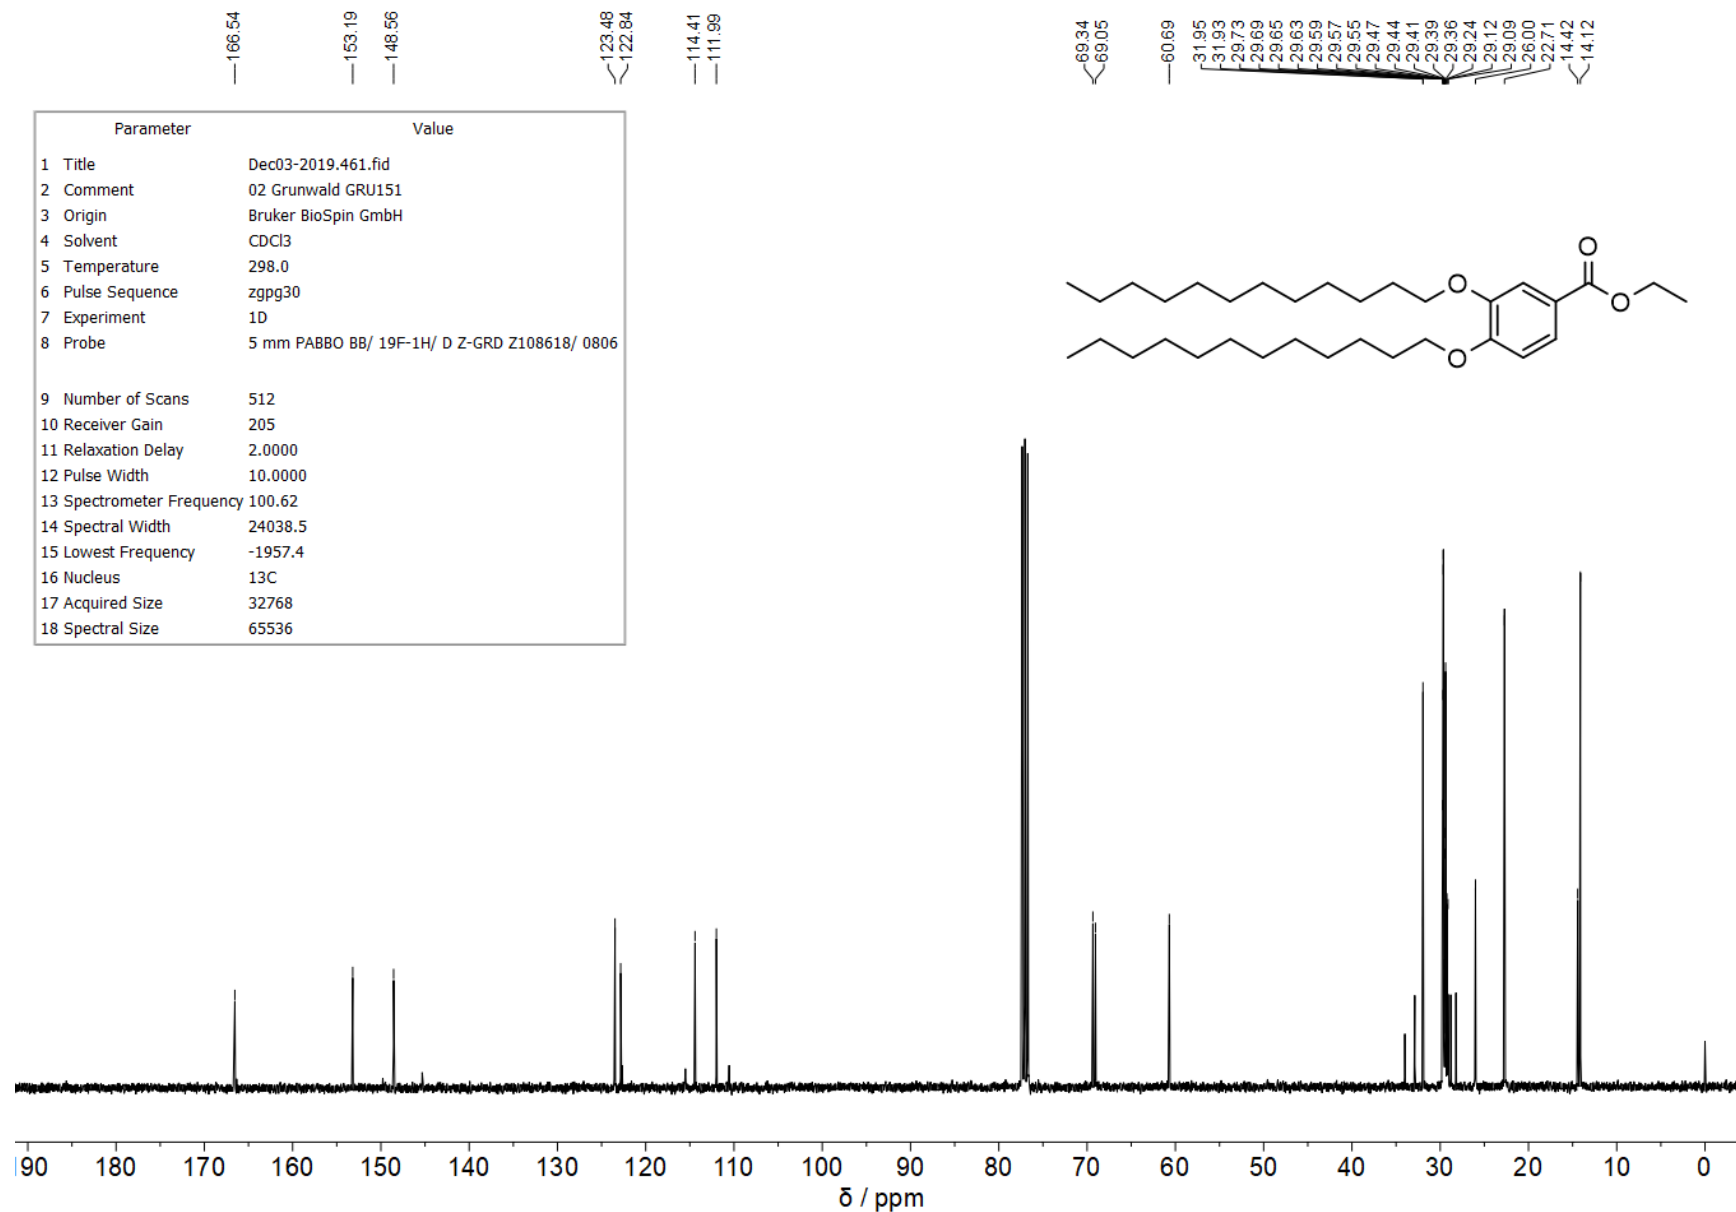

3,4-C<sub>14</sub>CO<sub>2</sub>Et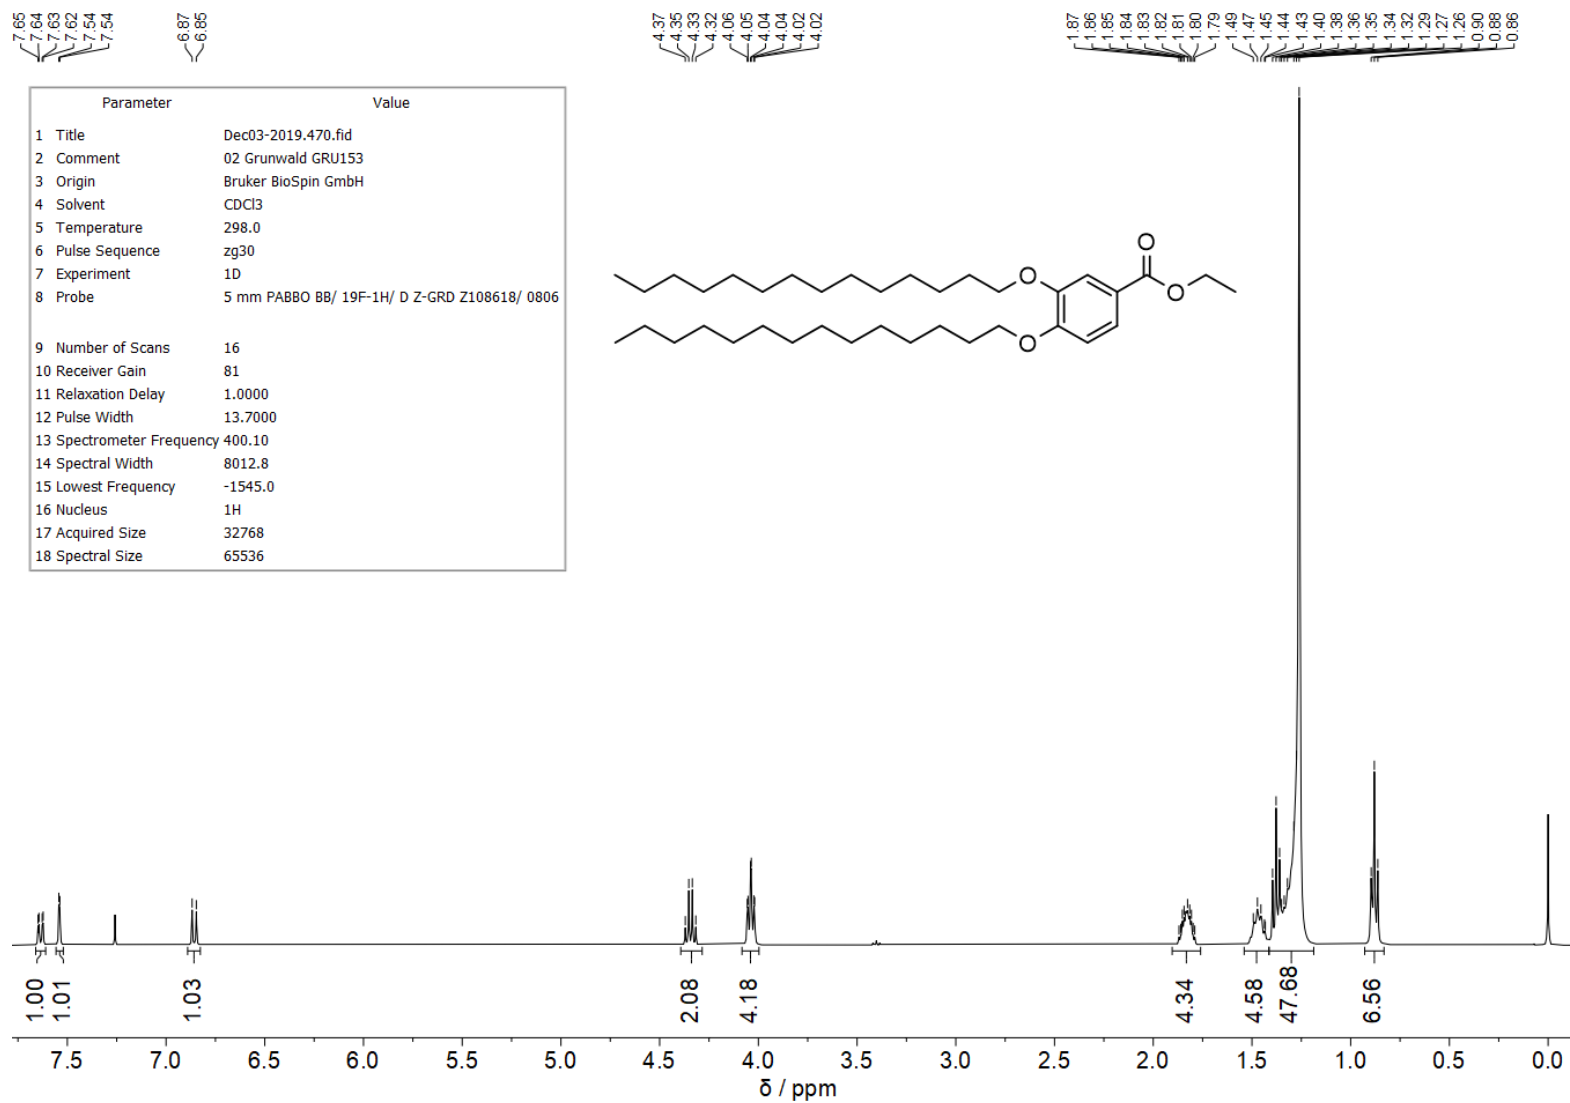



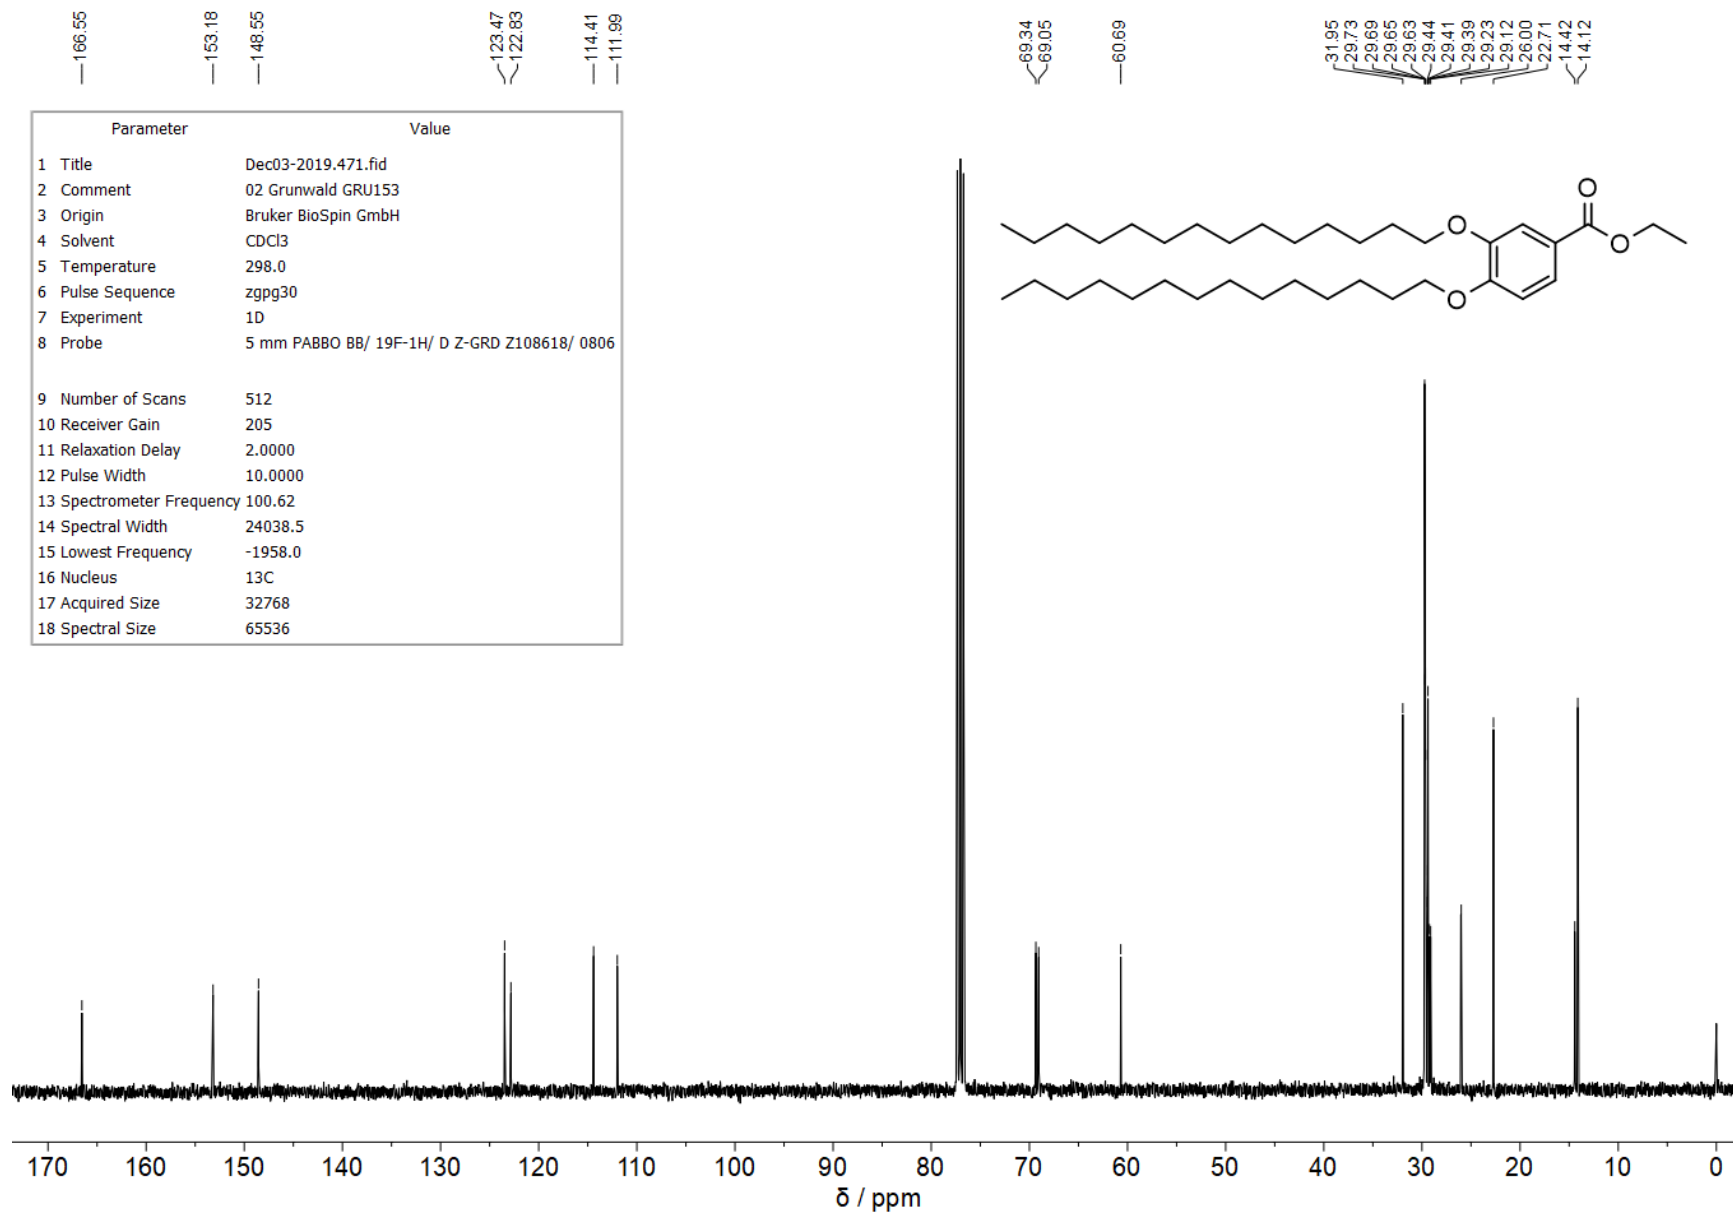

3,5-C<sub>10</sub>CO<sub>2</sub>Me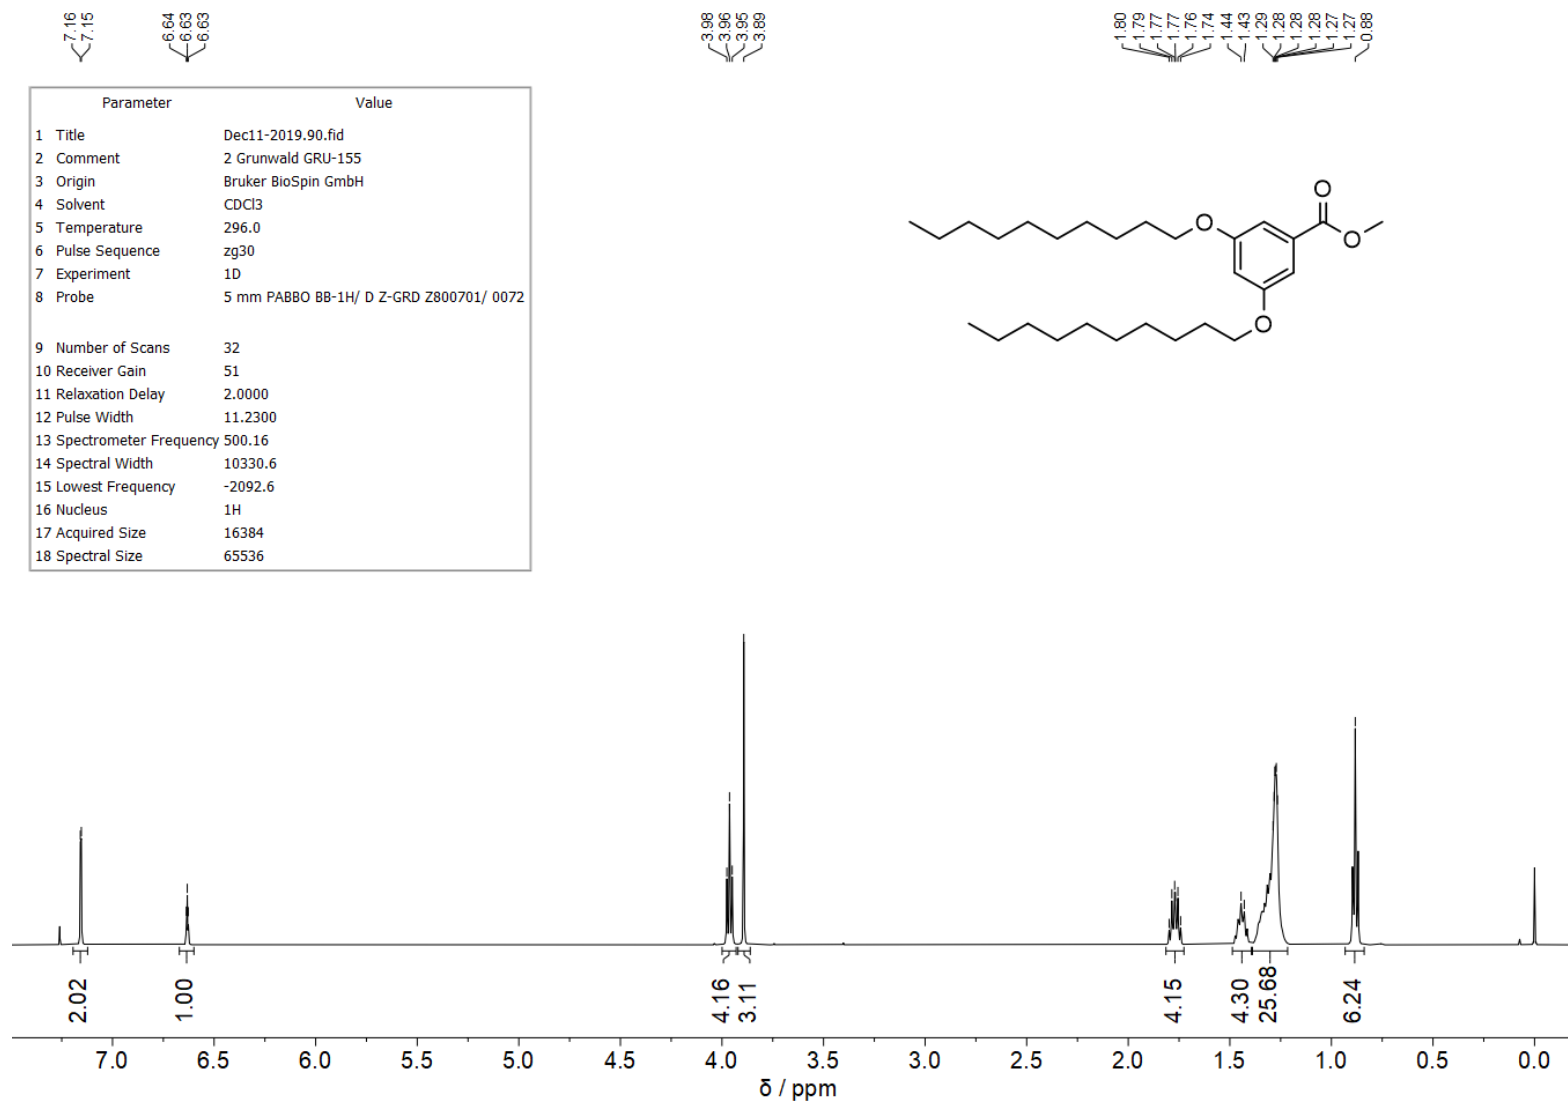

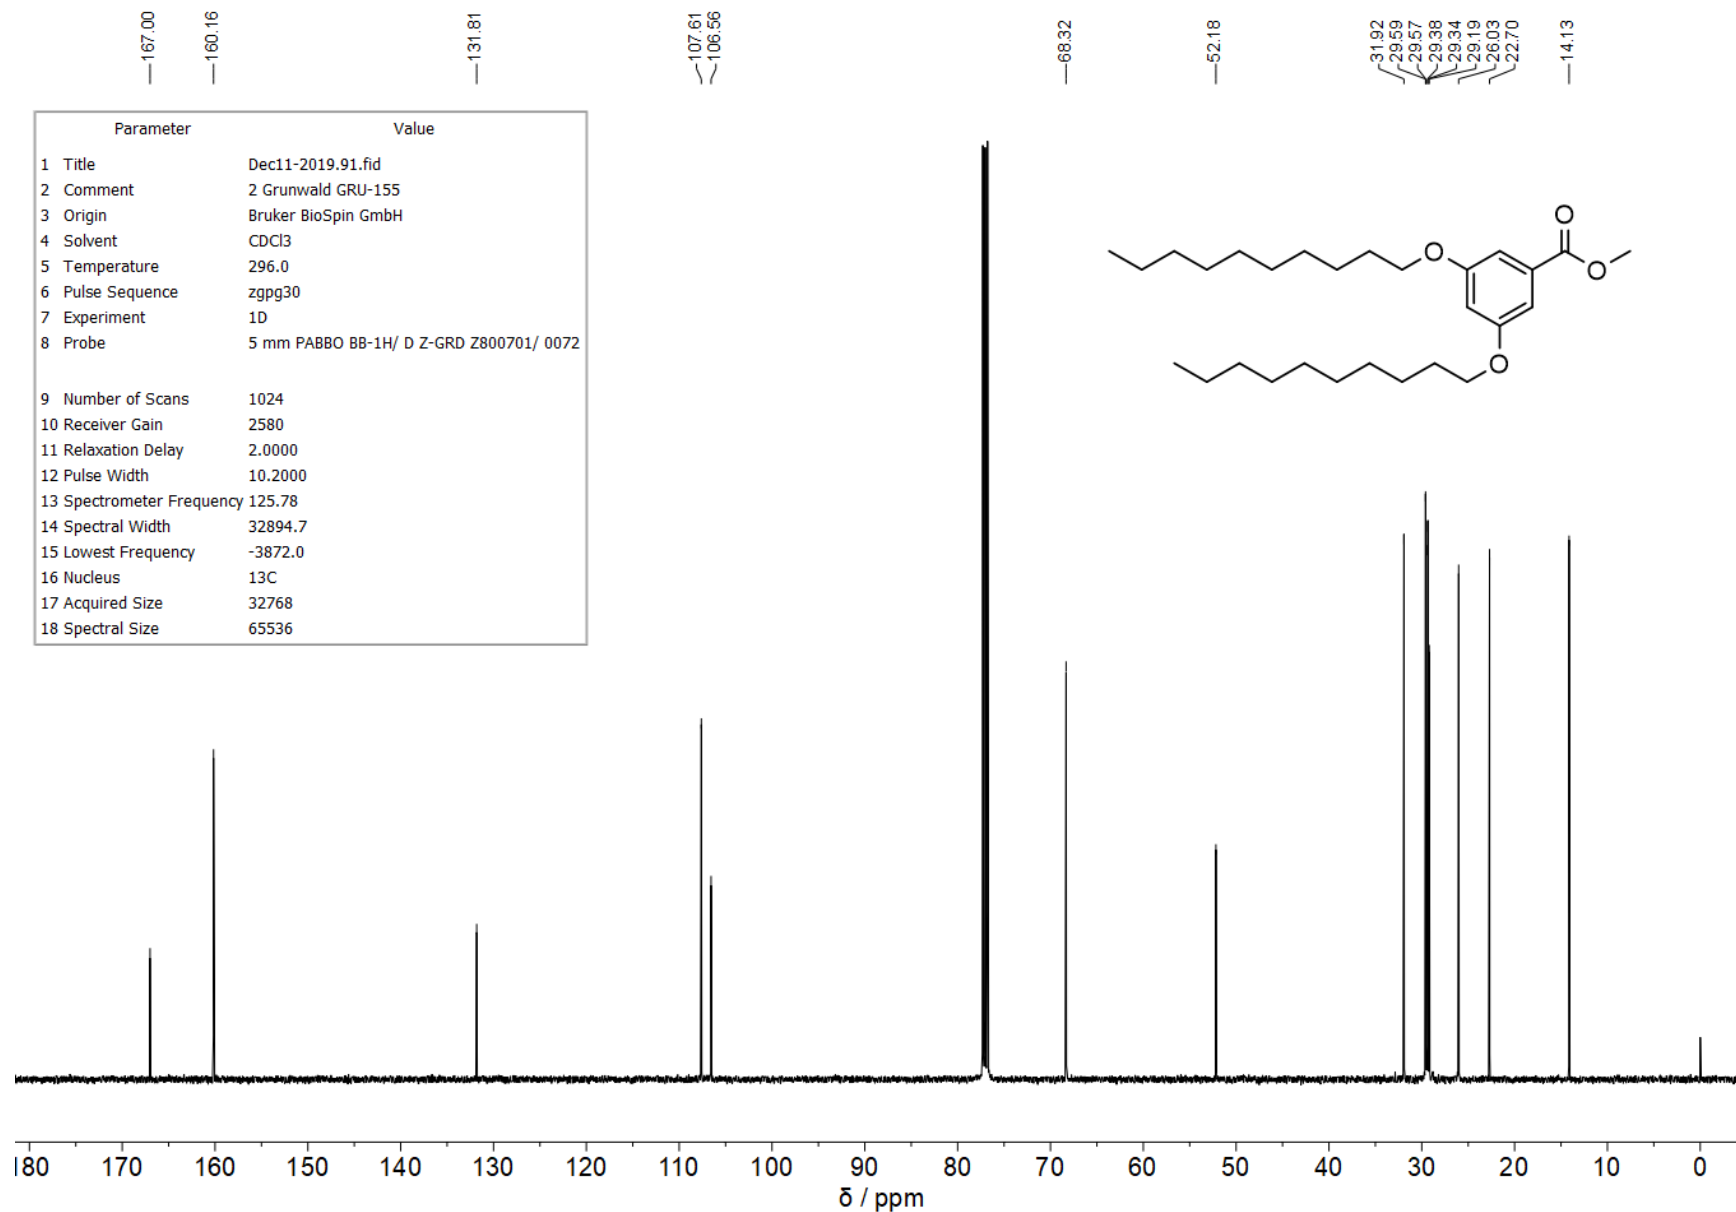

3,5-C<sub>12</sub>CO<sub>2</sub>Me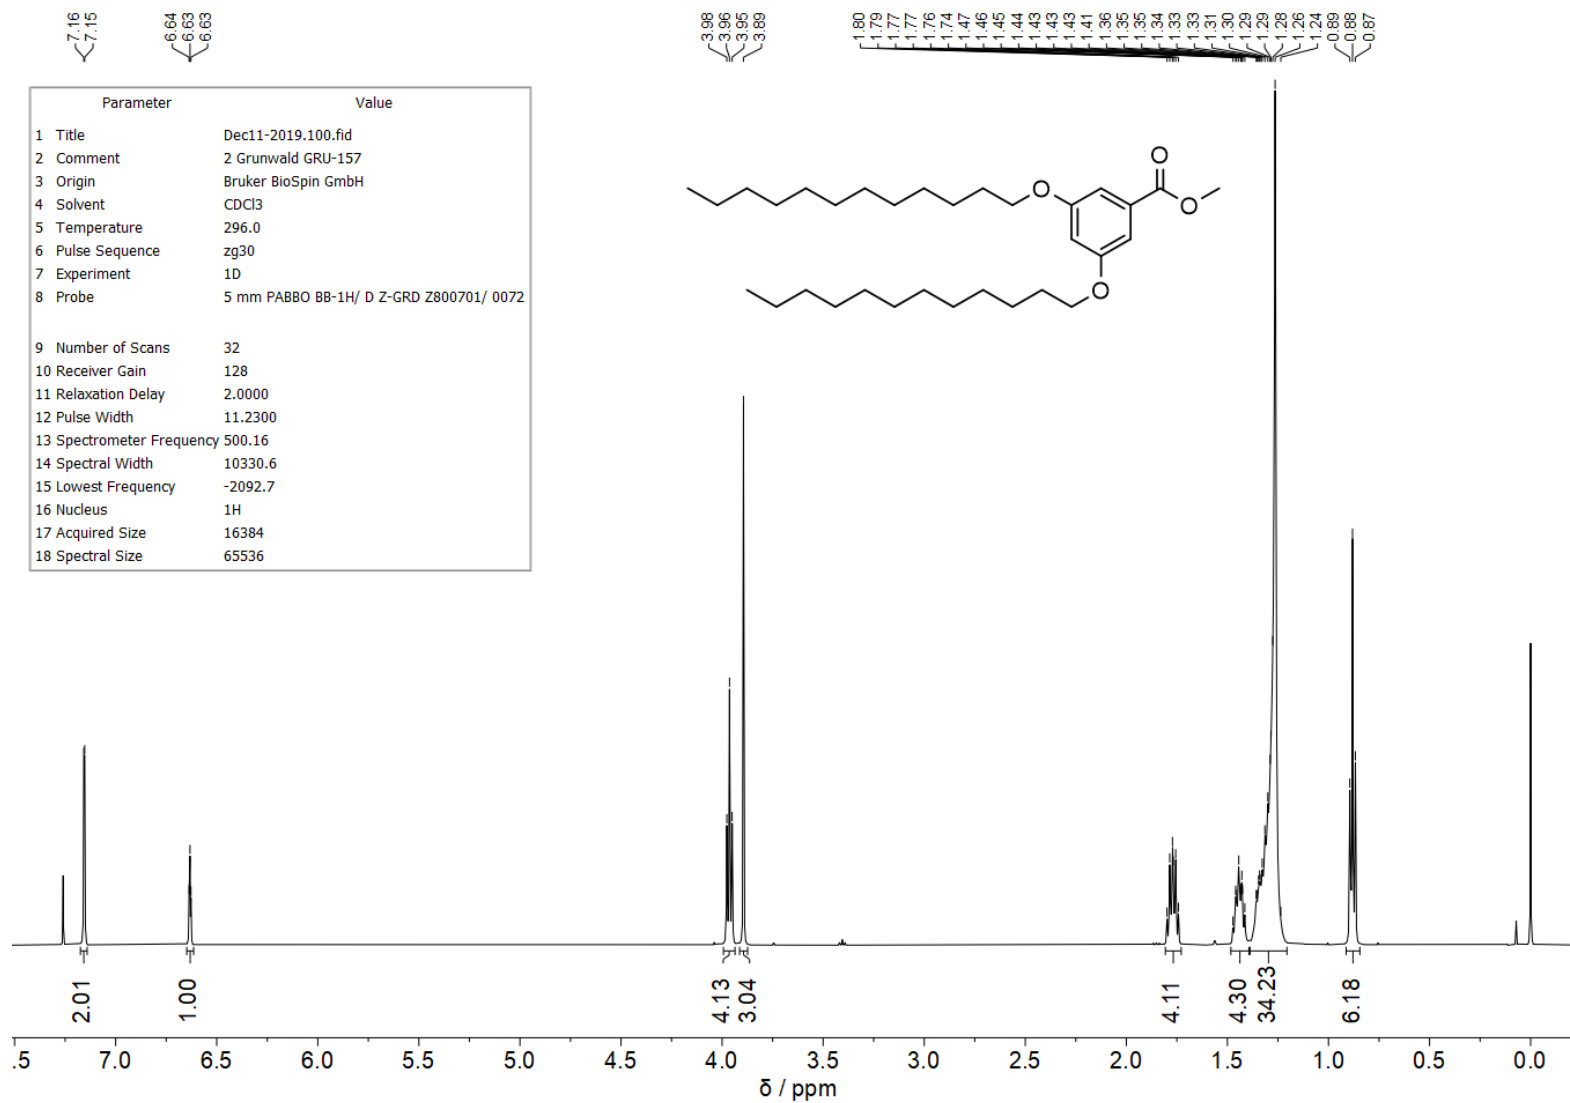

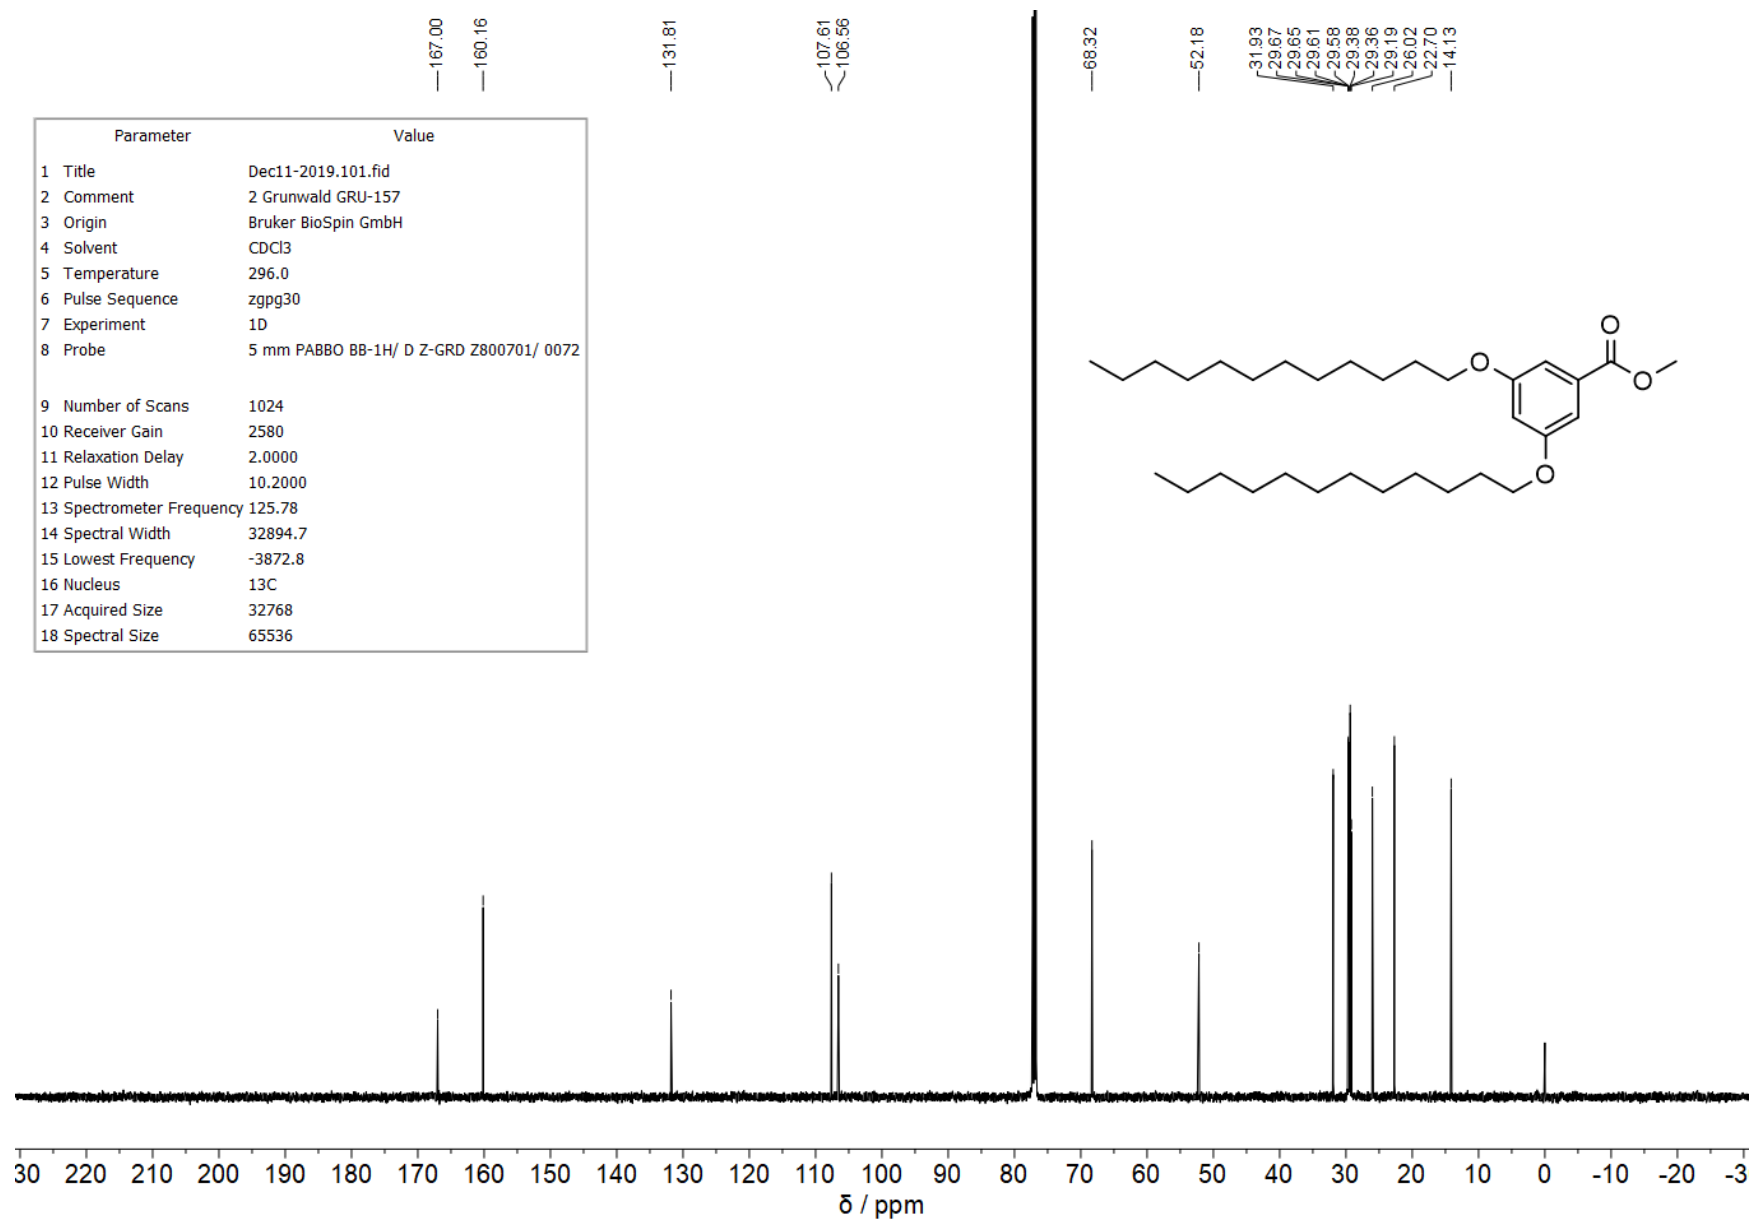

3,5-C<sub>14</sub>CO<sub>2</sub>Me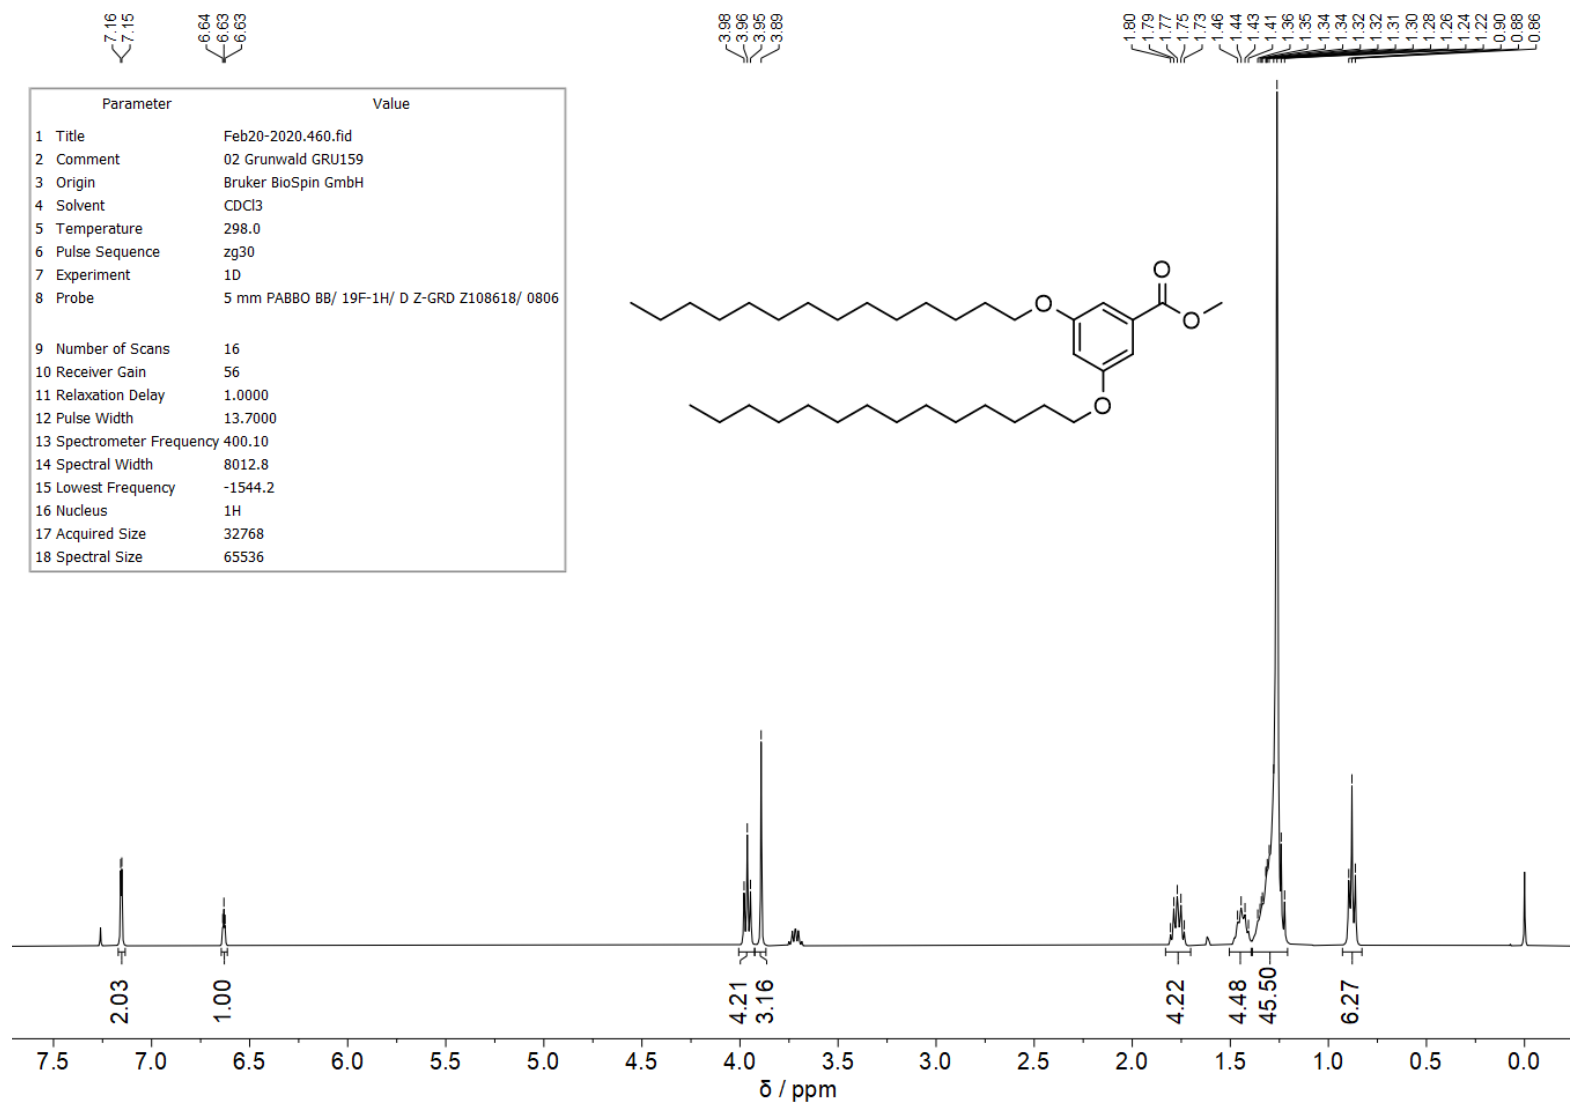

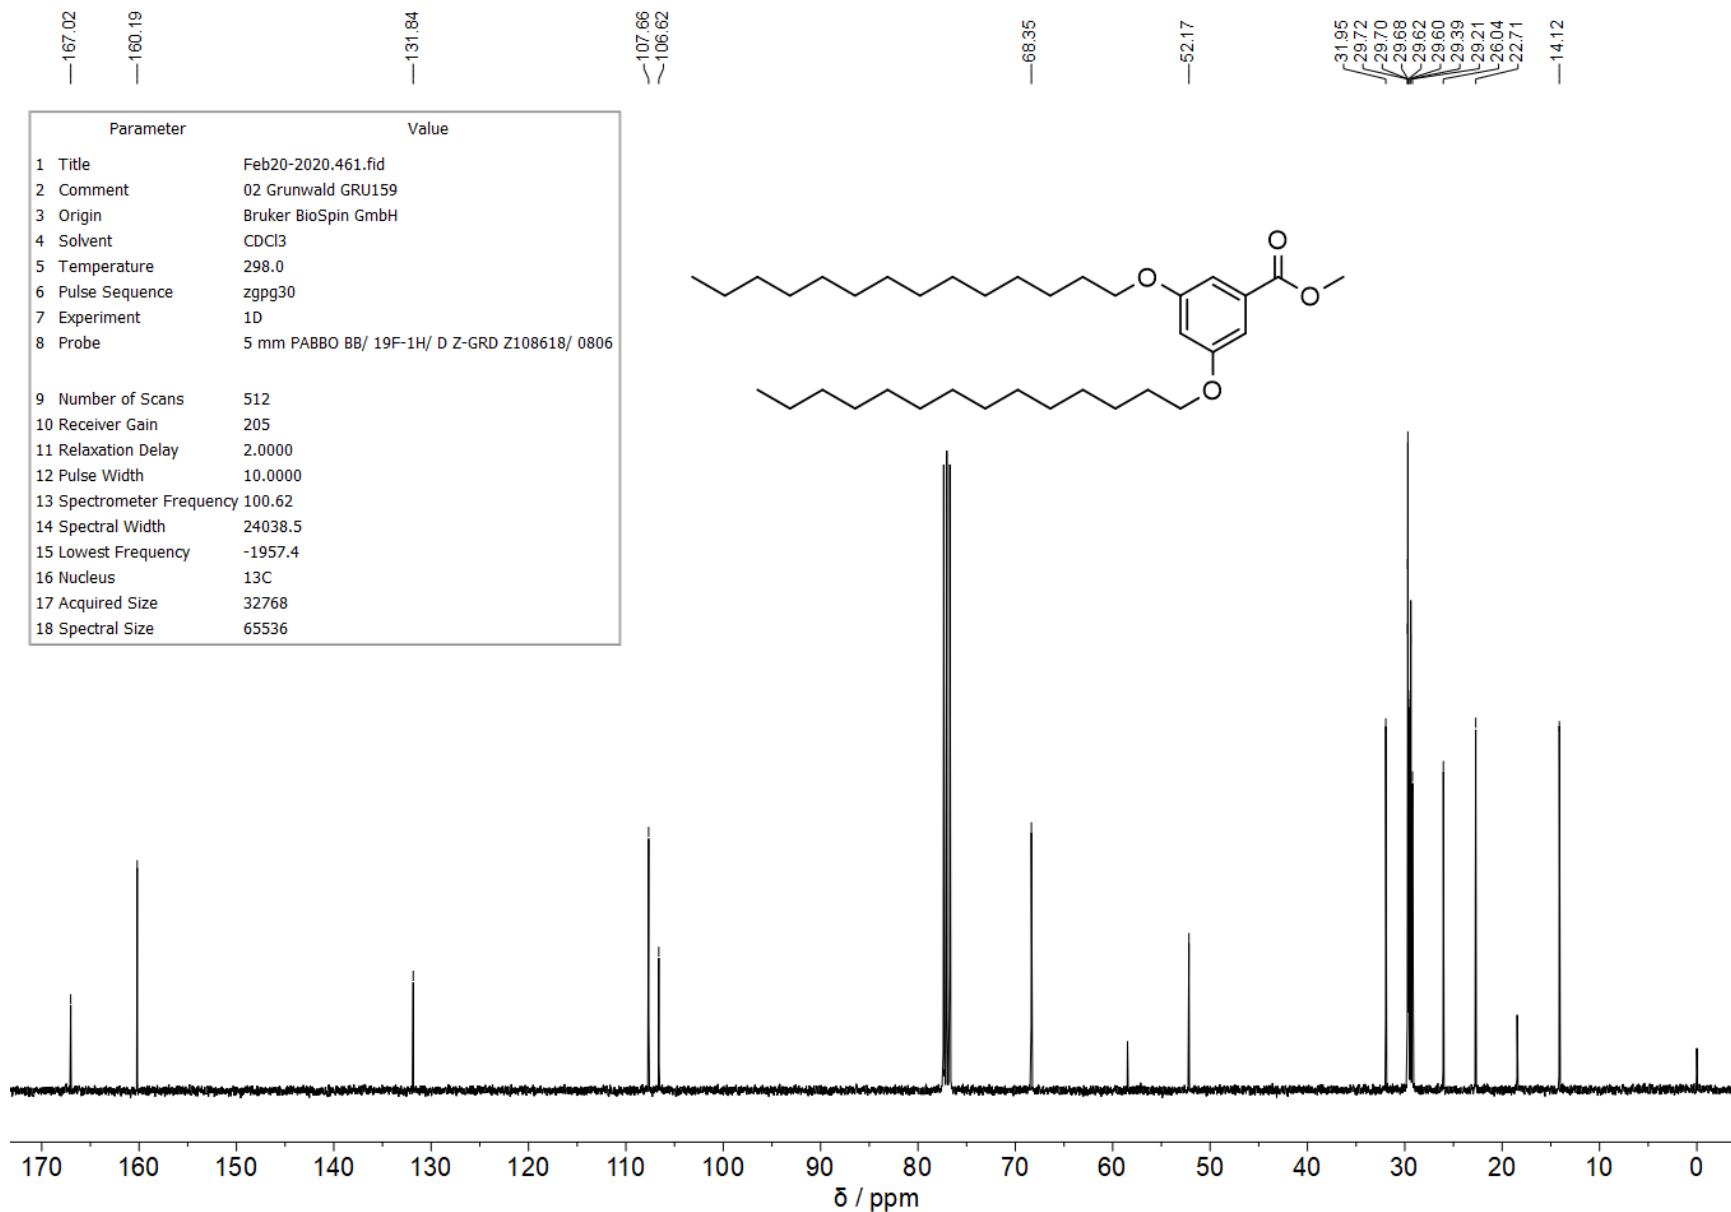

3,4,5-C<sub>10</sub>CO<sub>2</sub>Et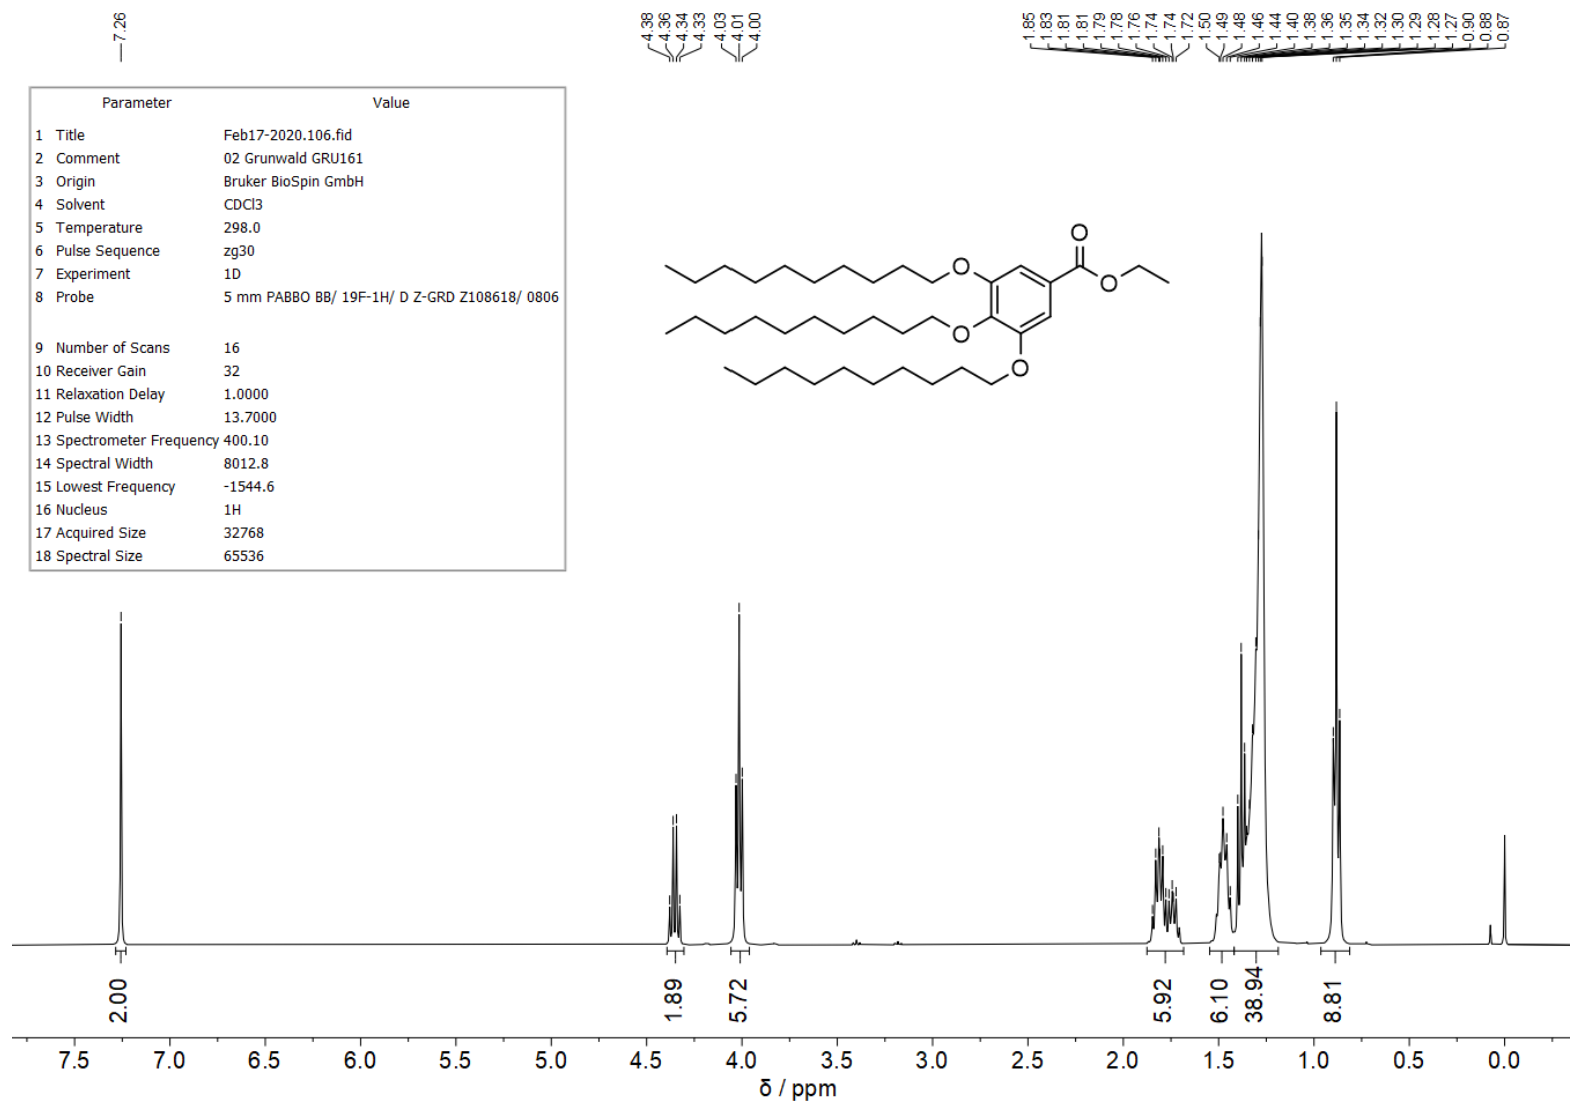



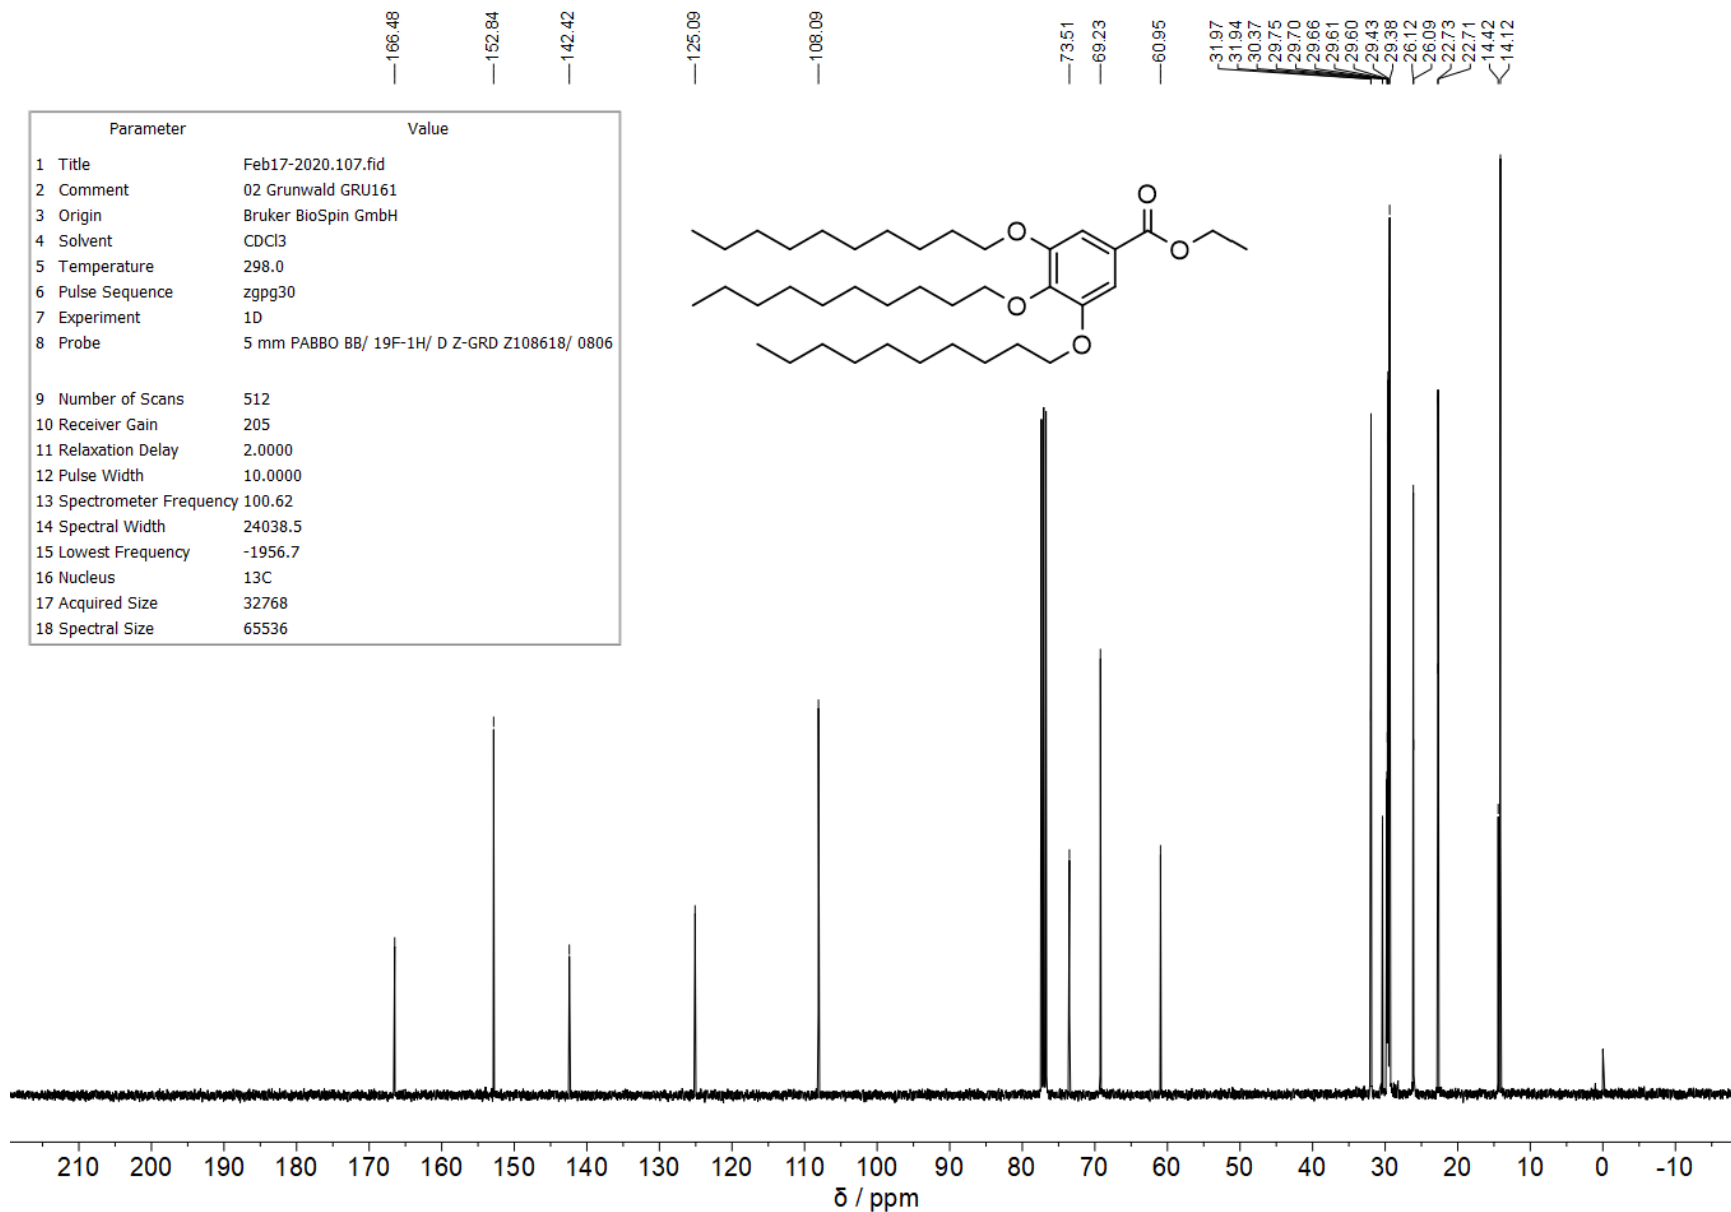

3,4,5-C<sub>12</sub>CO<sub>2</sub>Et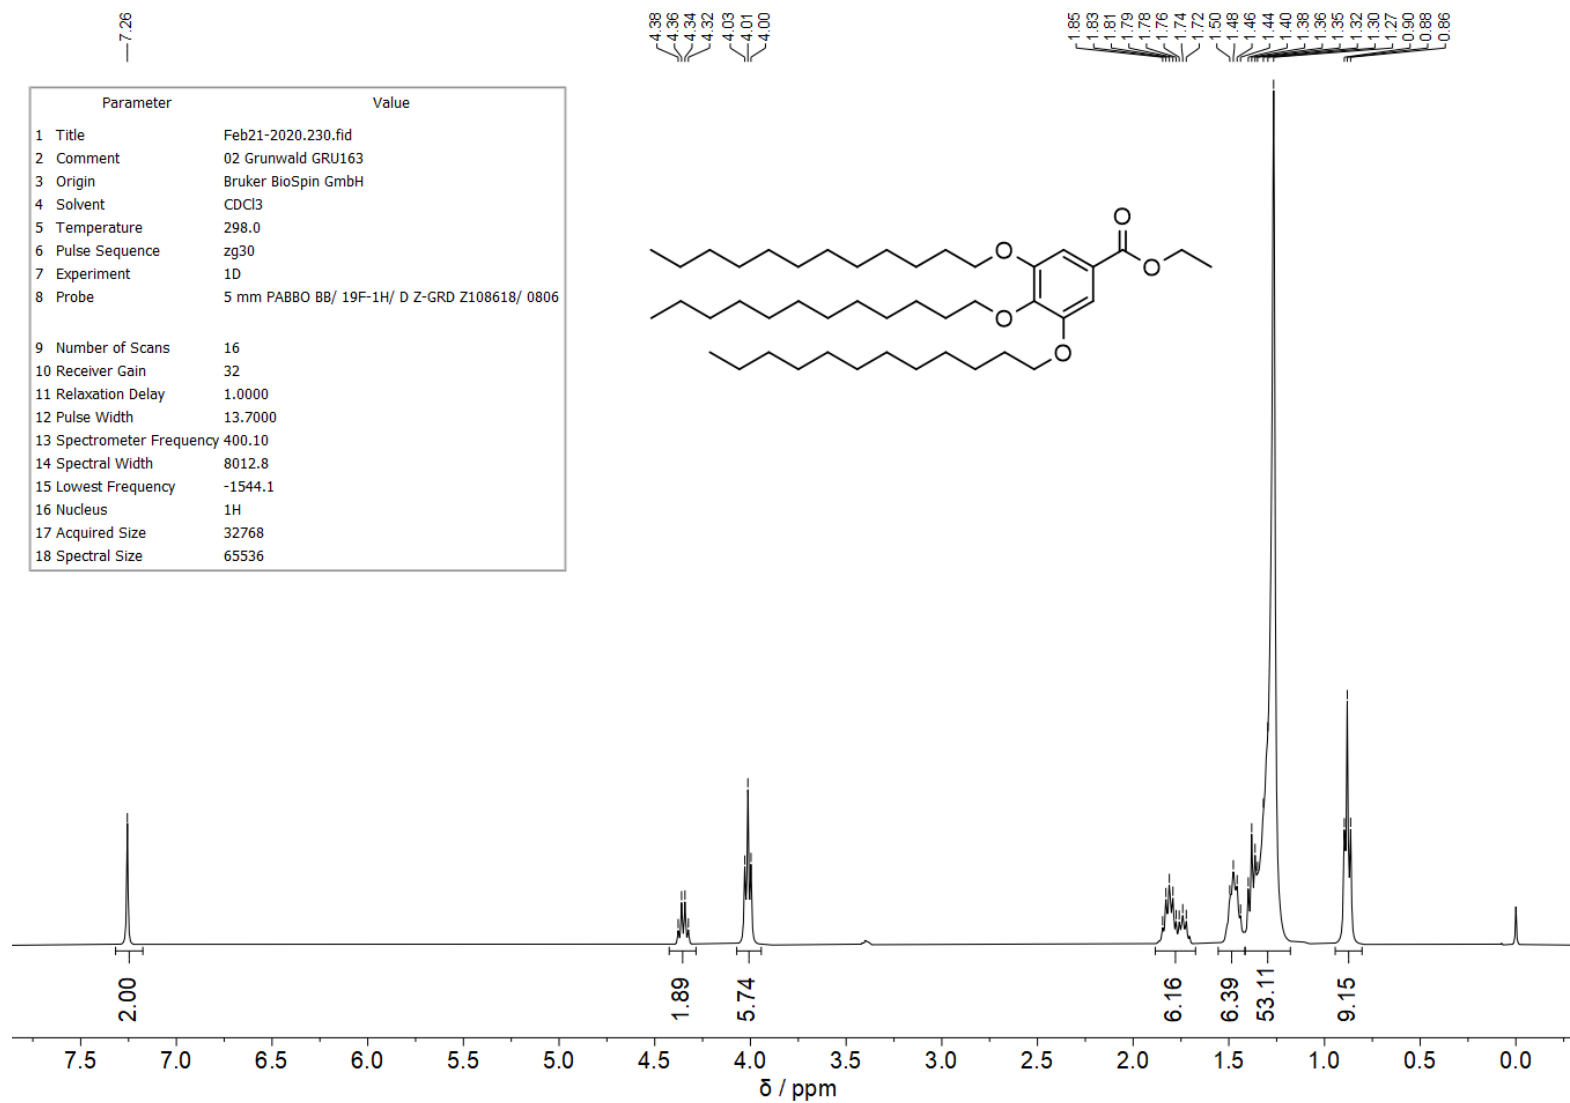

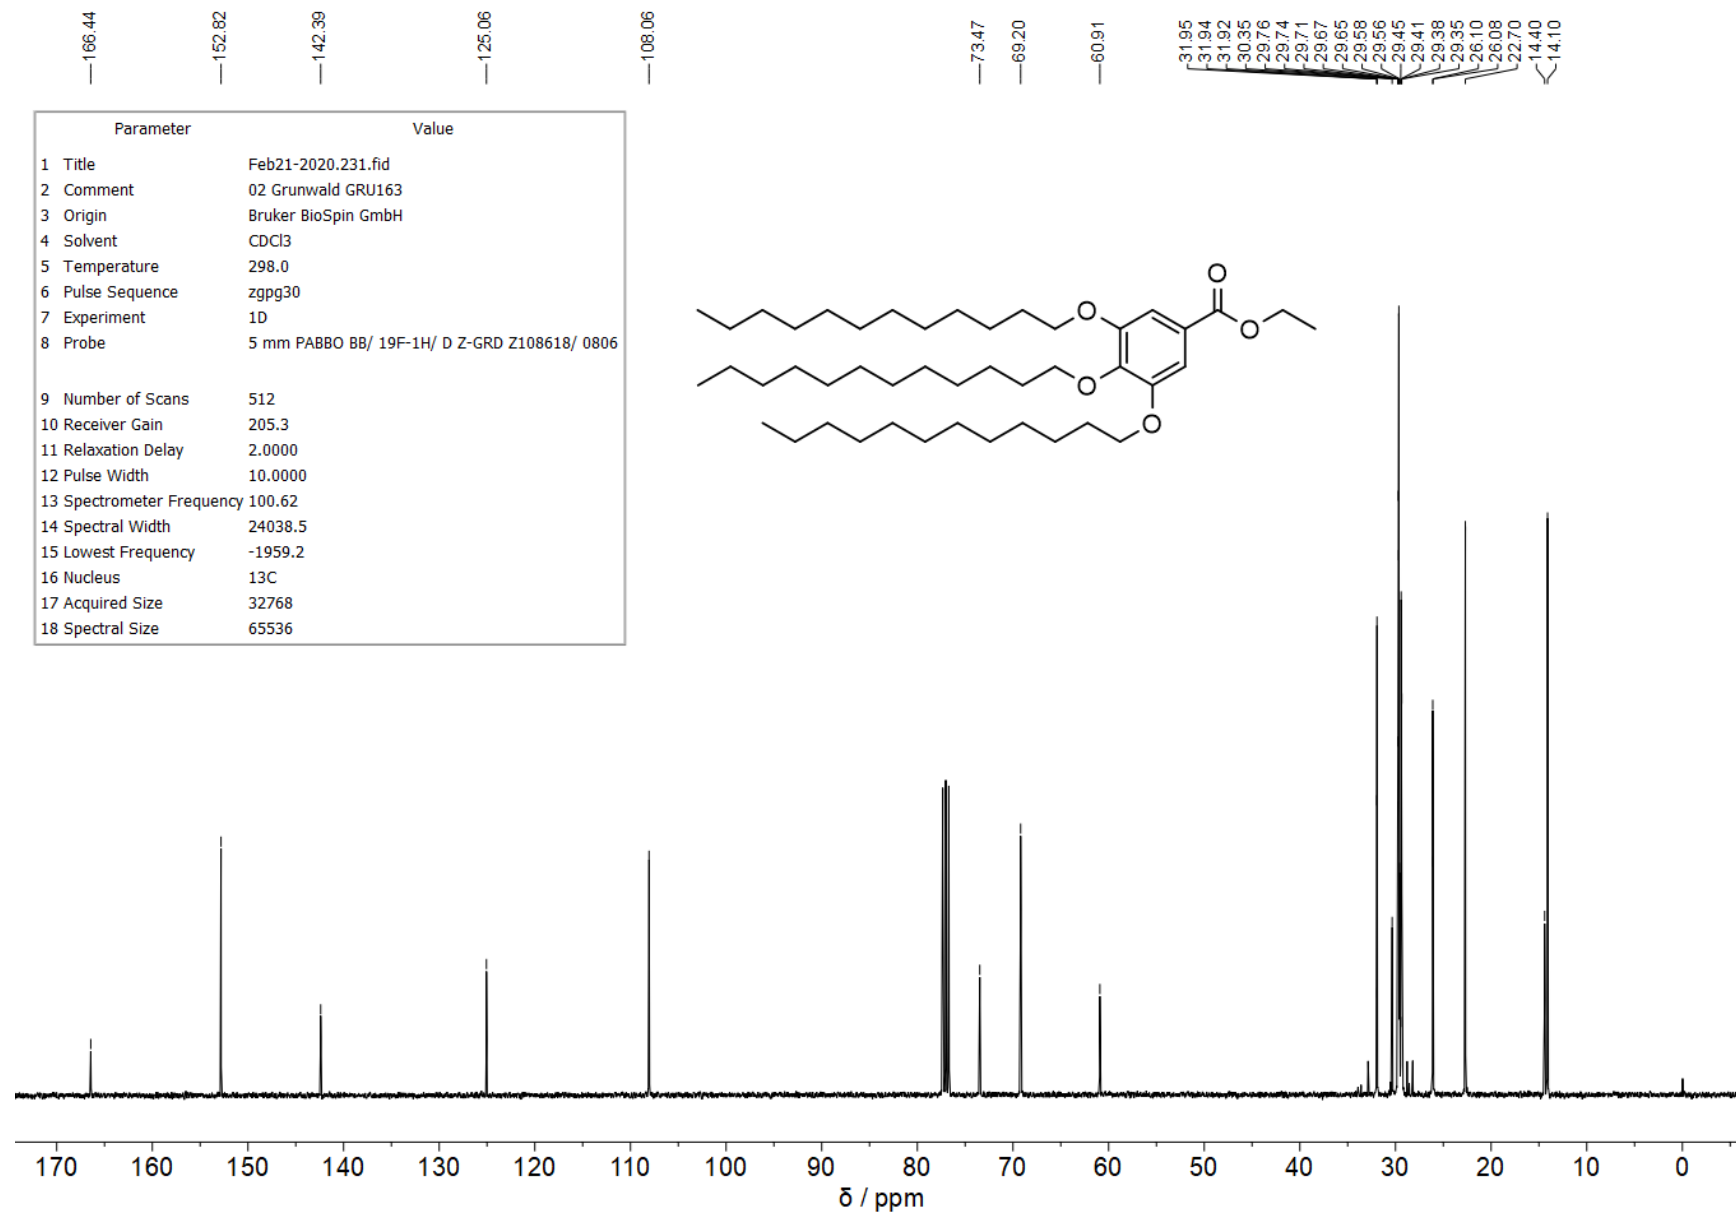

3,4,5-C<sub>14</sub>CO<sub>2</sub>Et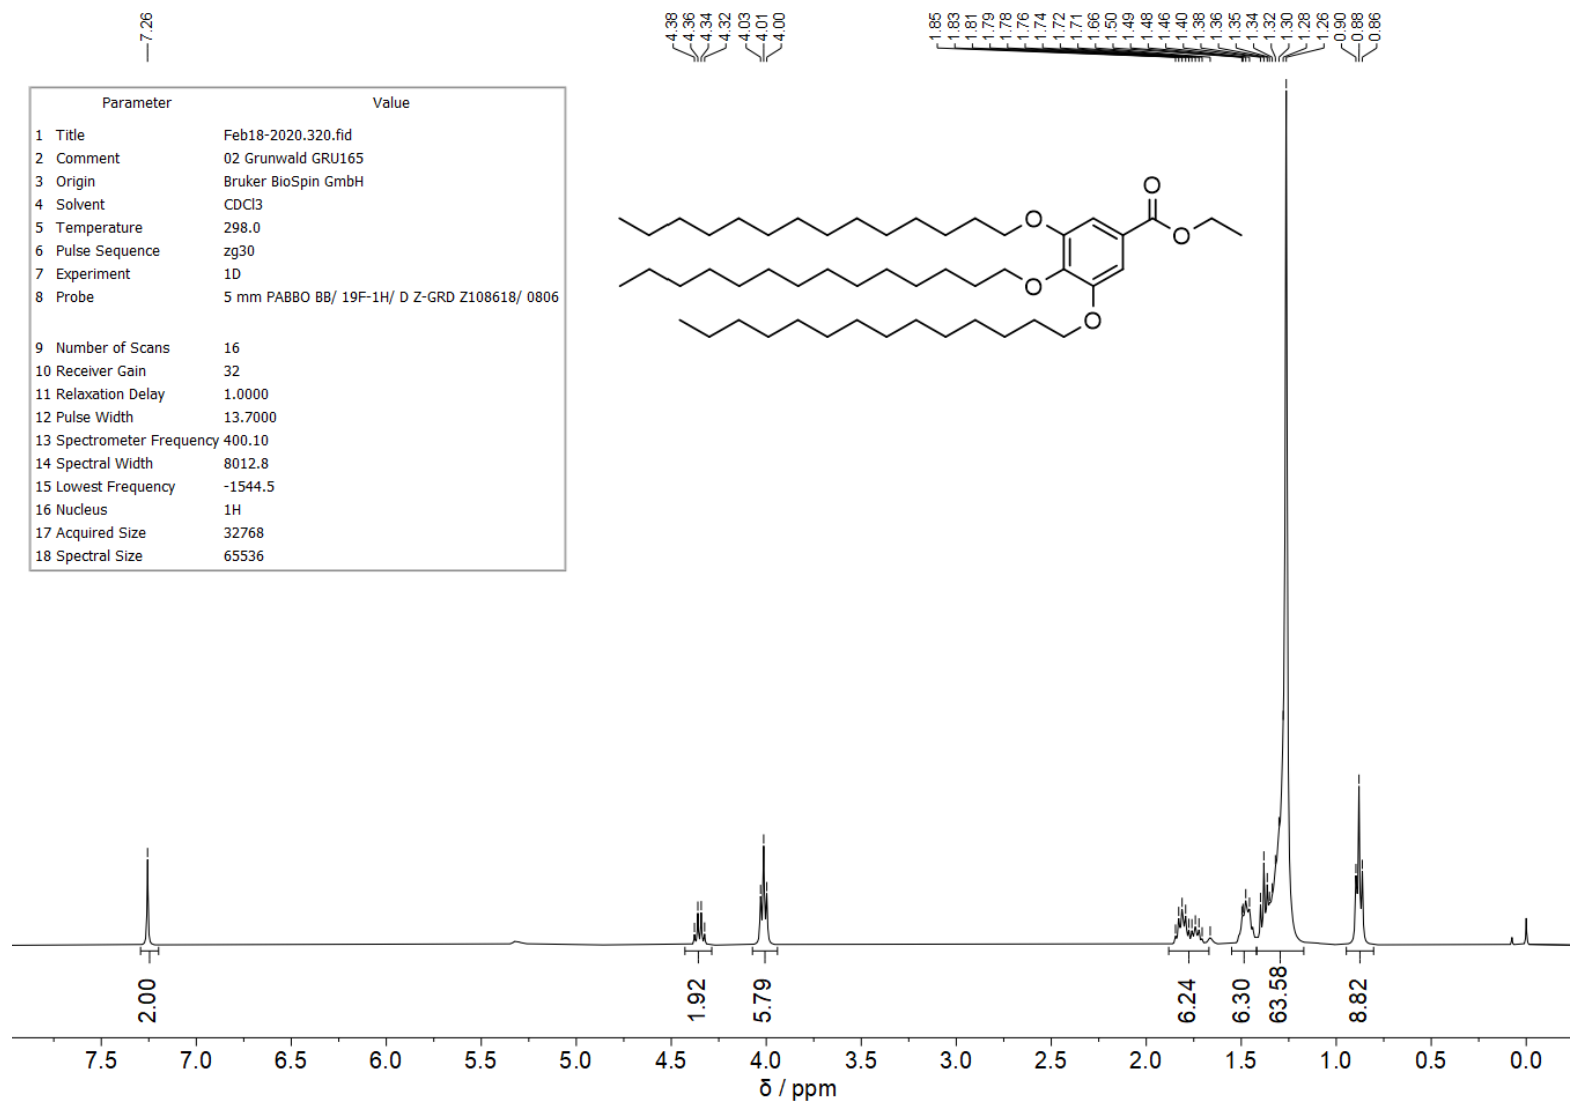

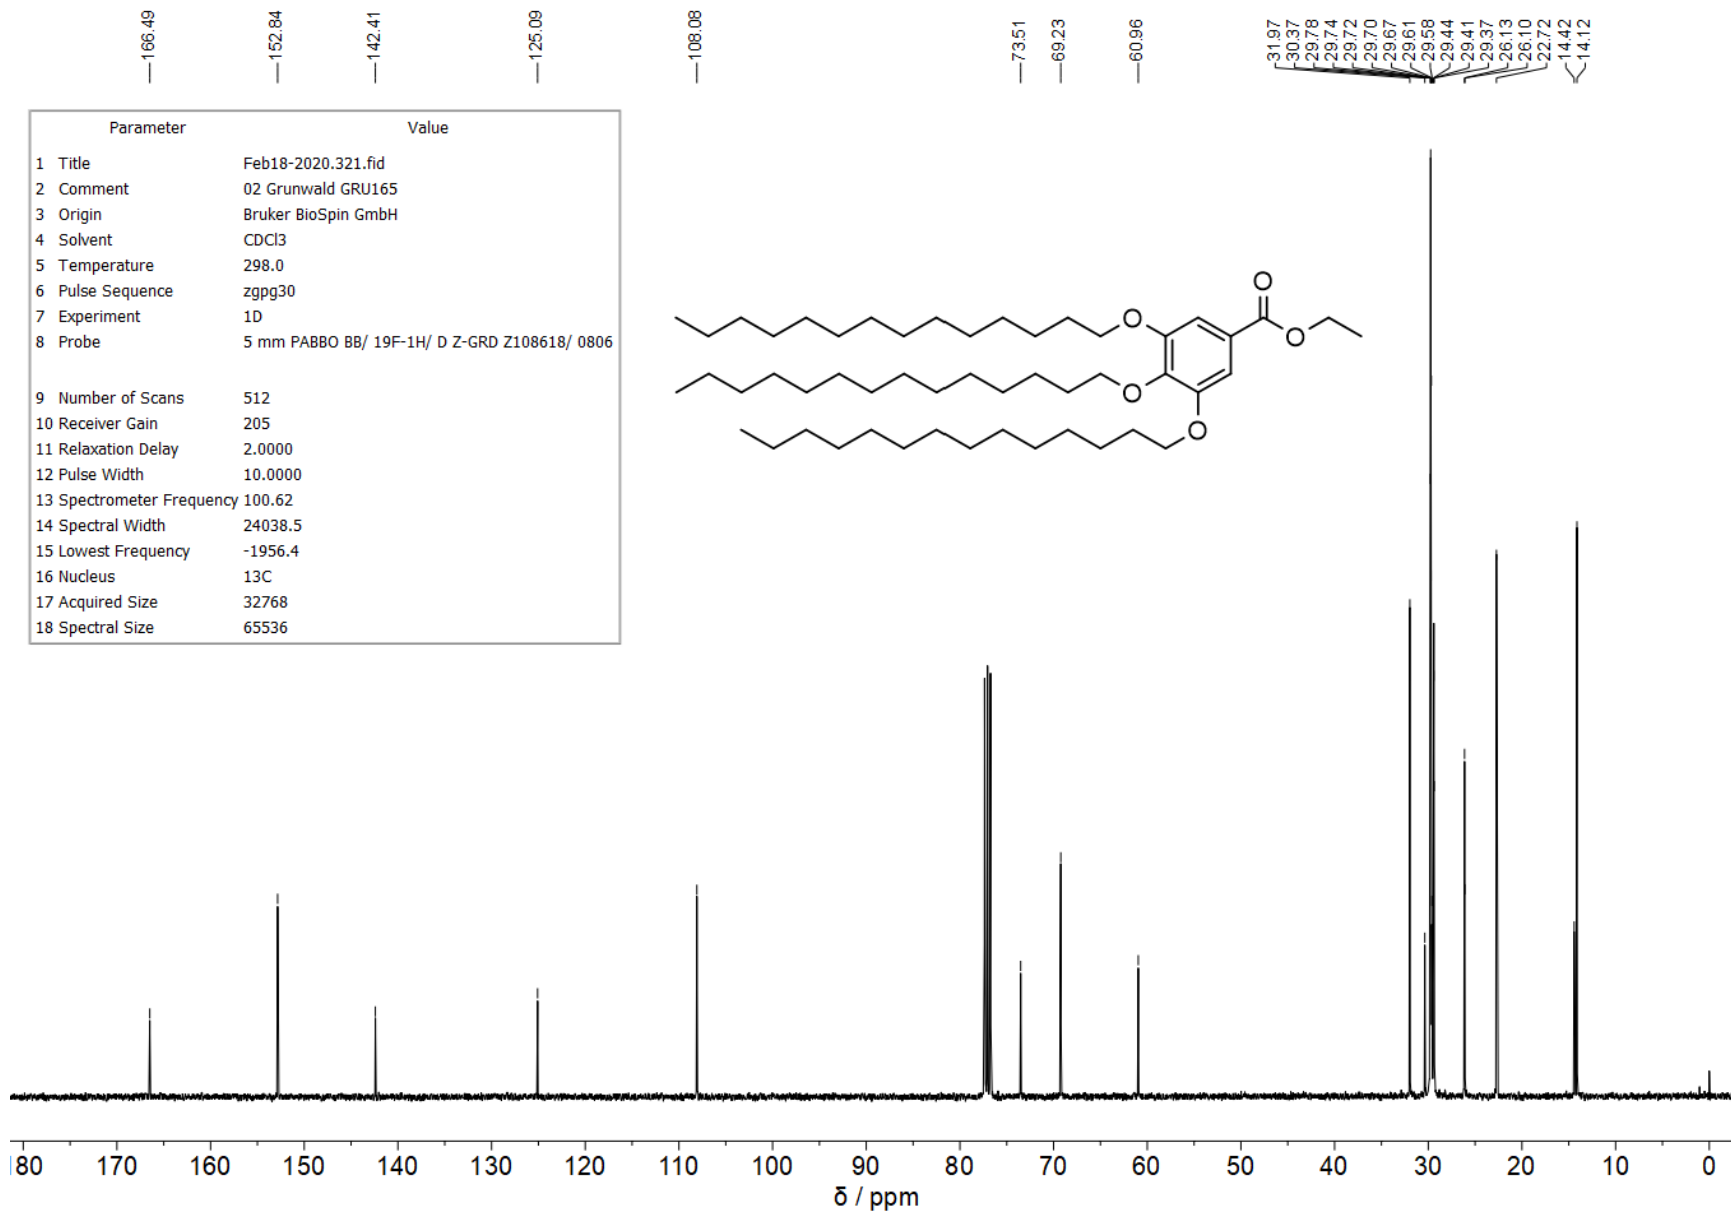

4-C<sub>10</sub>CO<sub>2</sub>H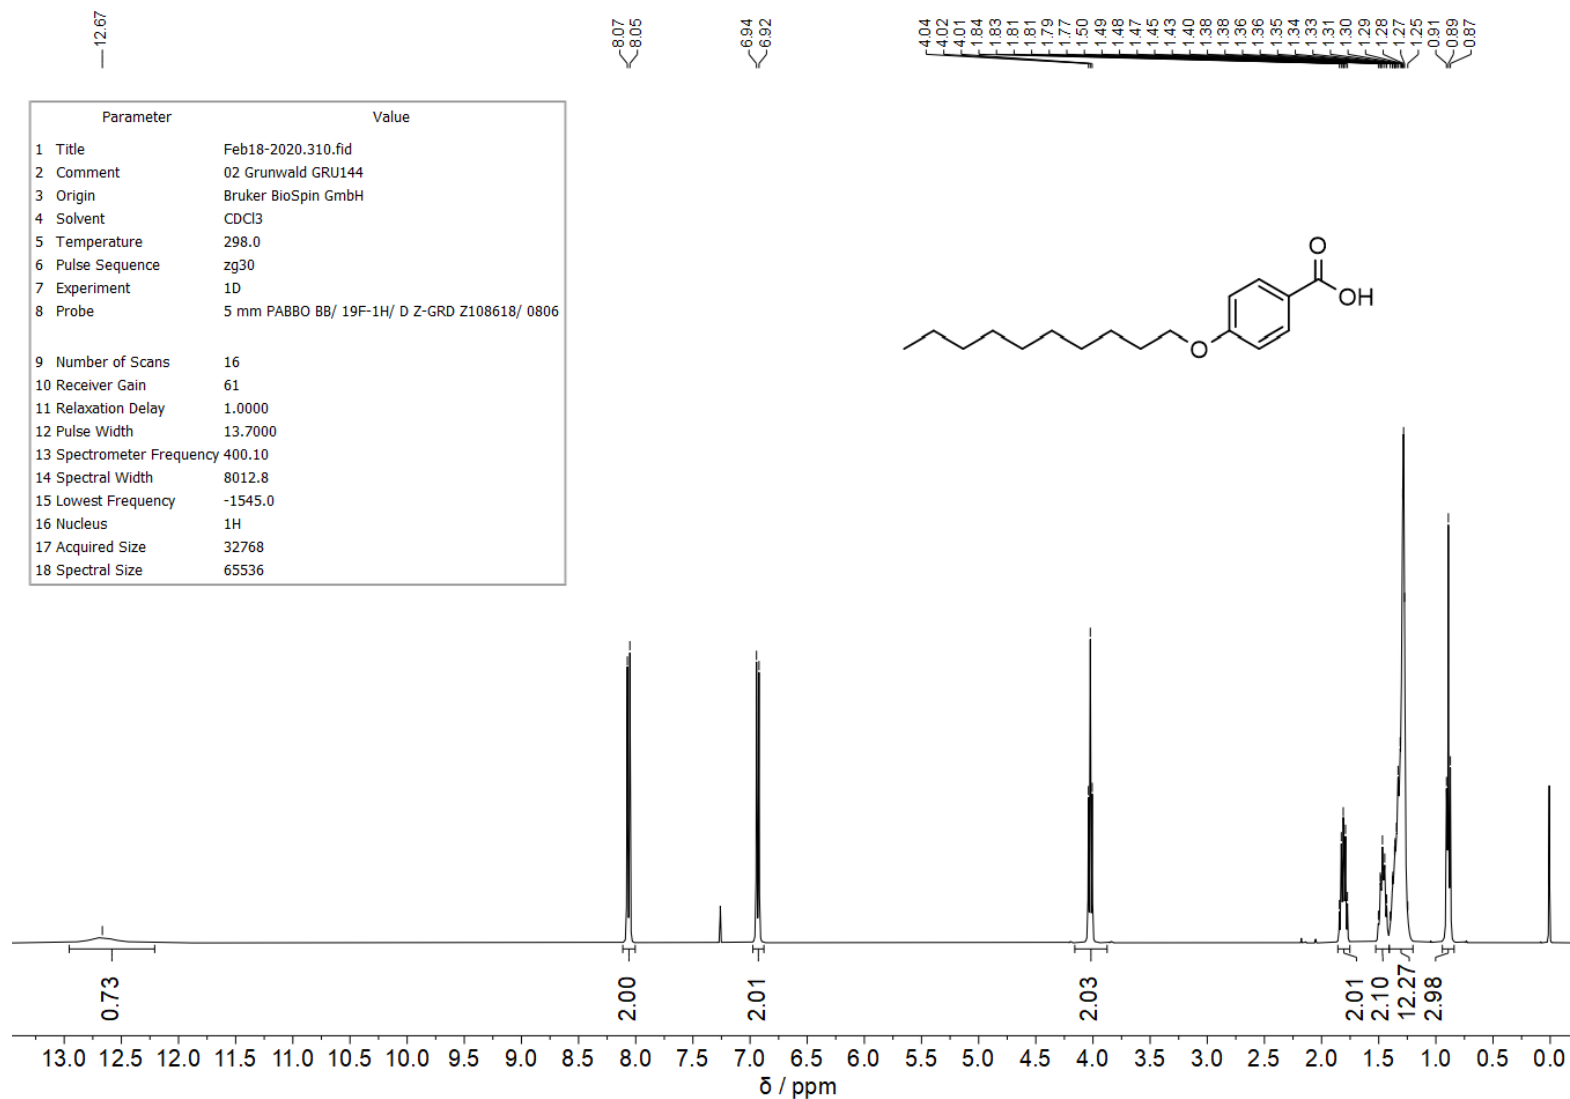

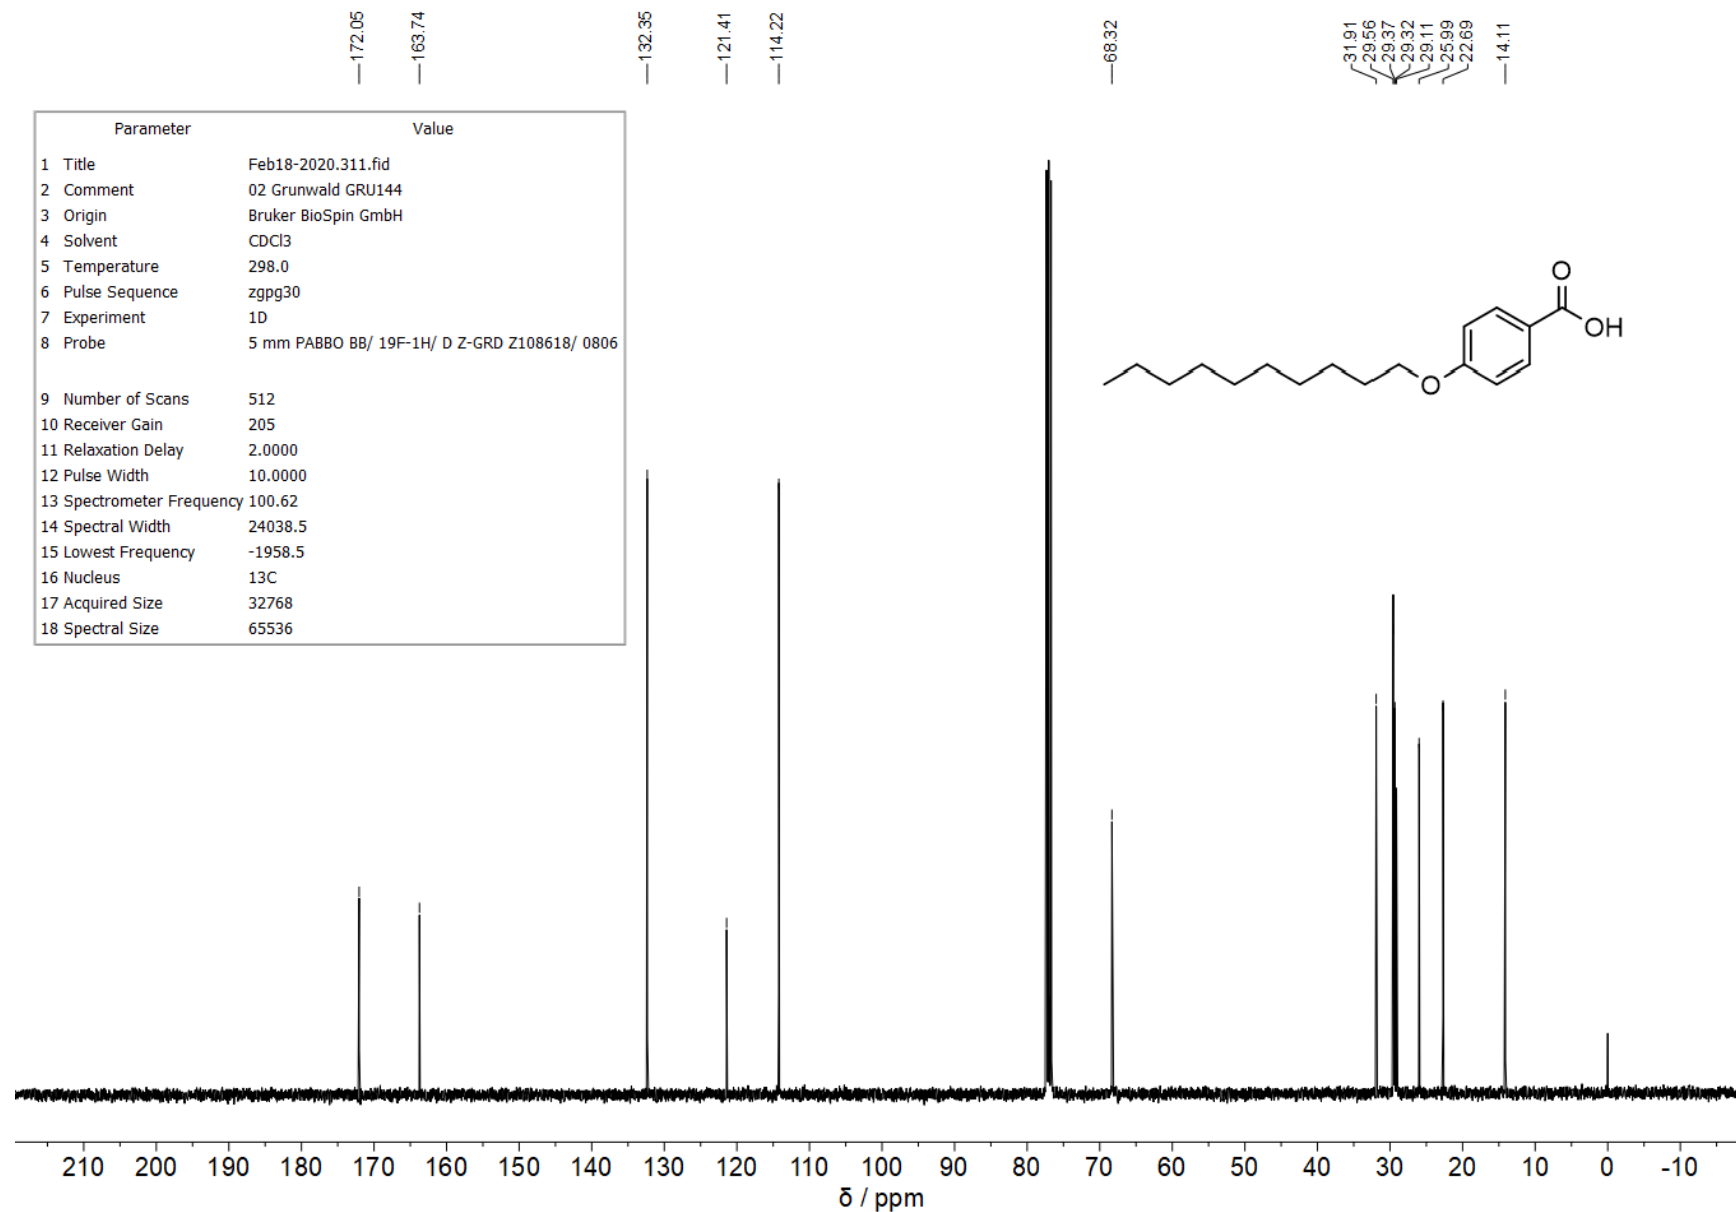

4-C<sub>12</sub>CO<sub>2</sub>H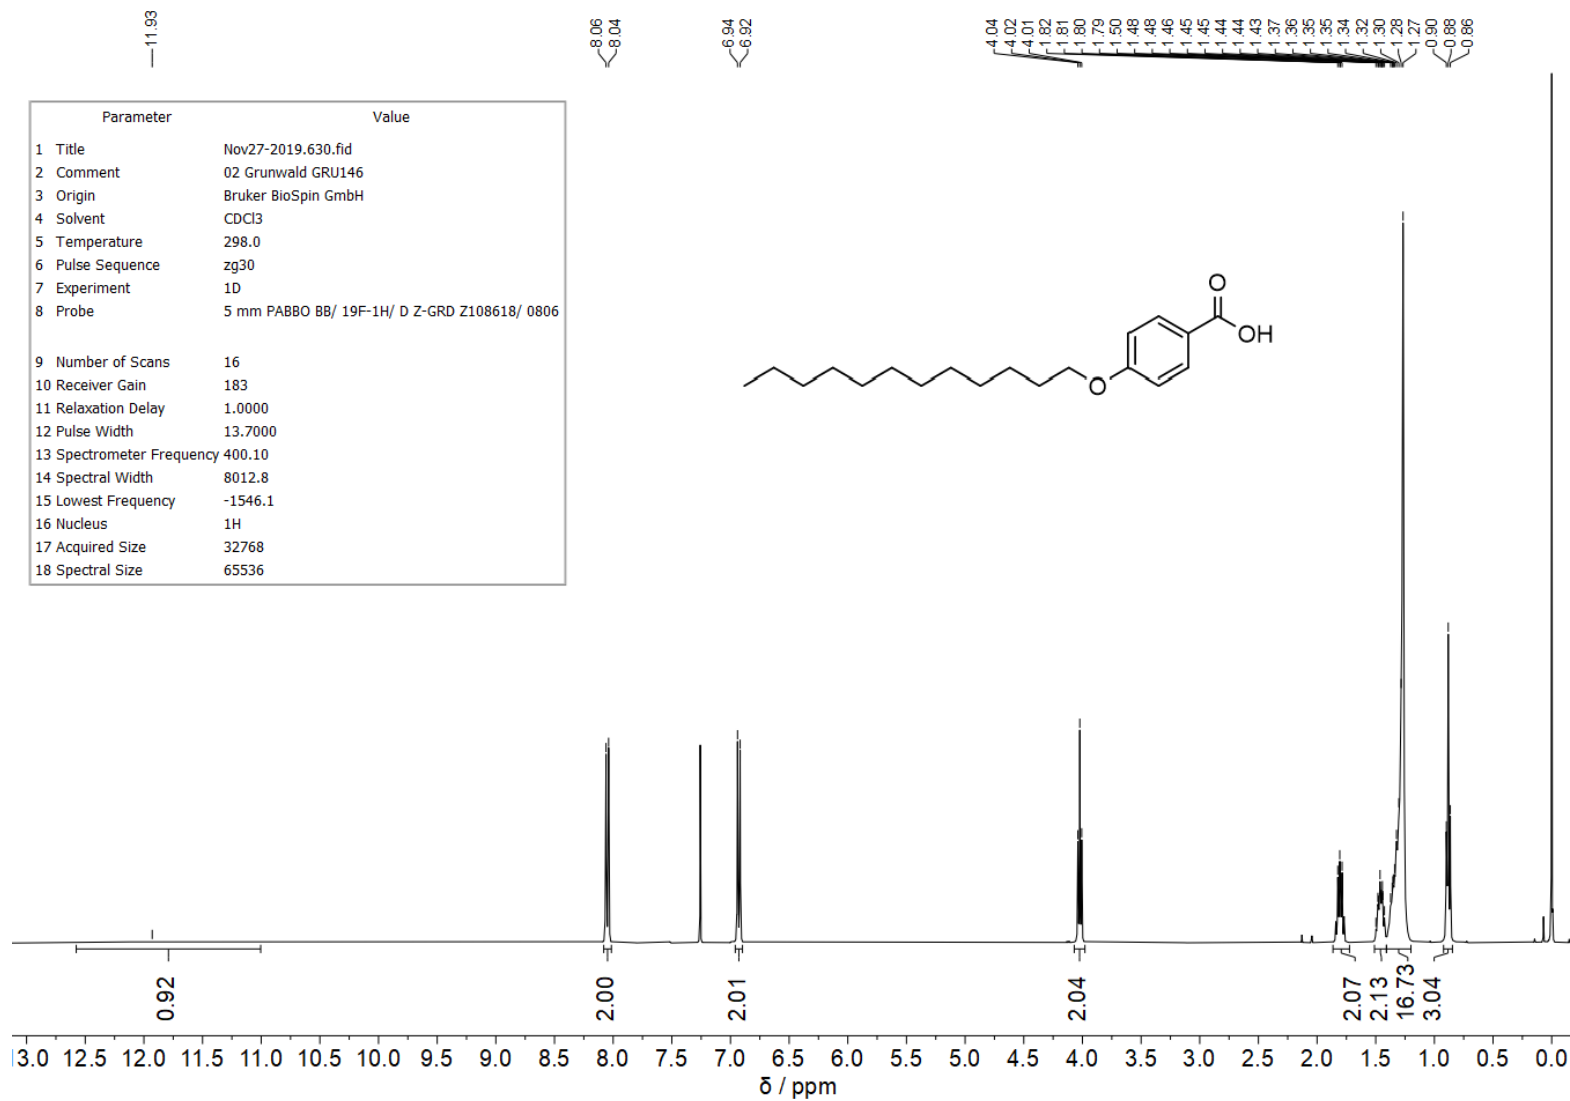



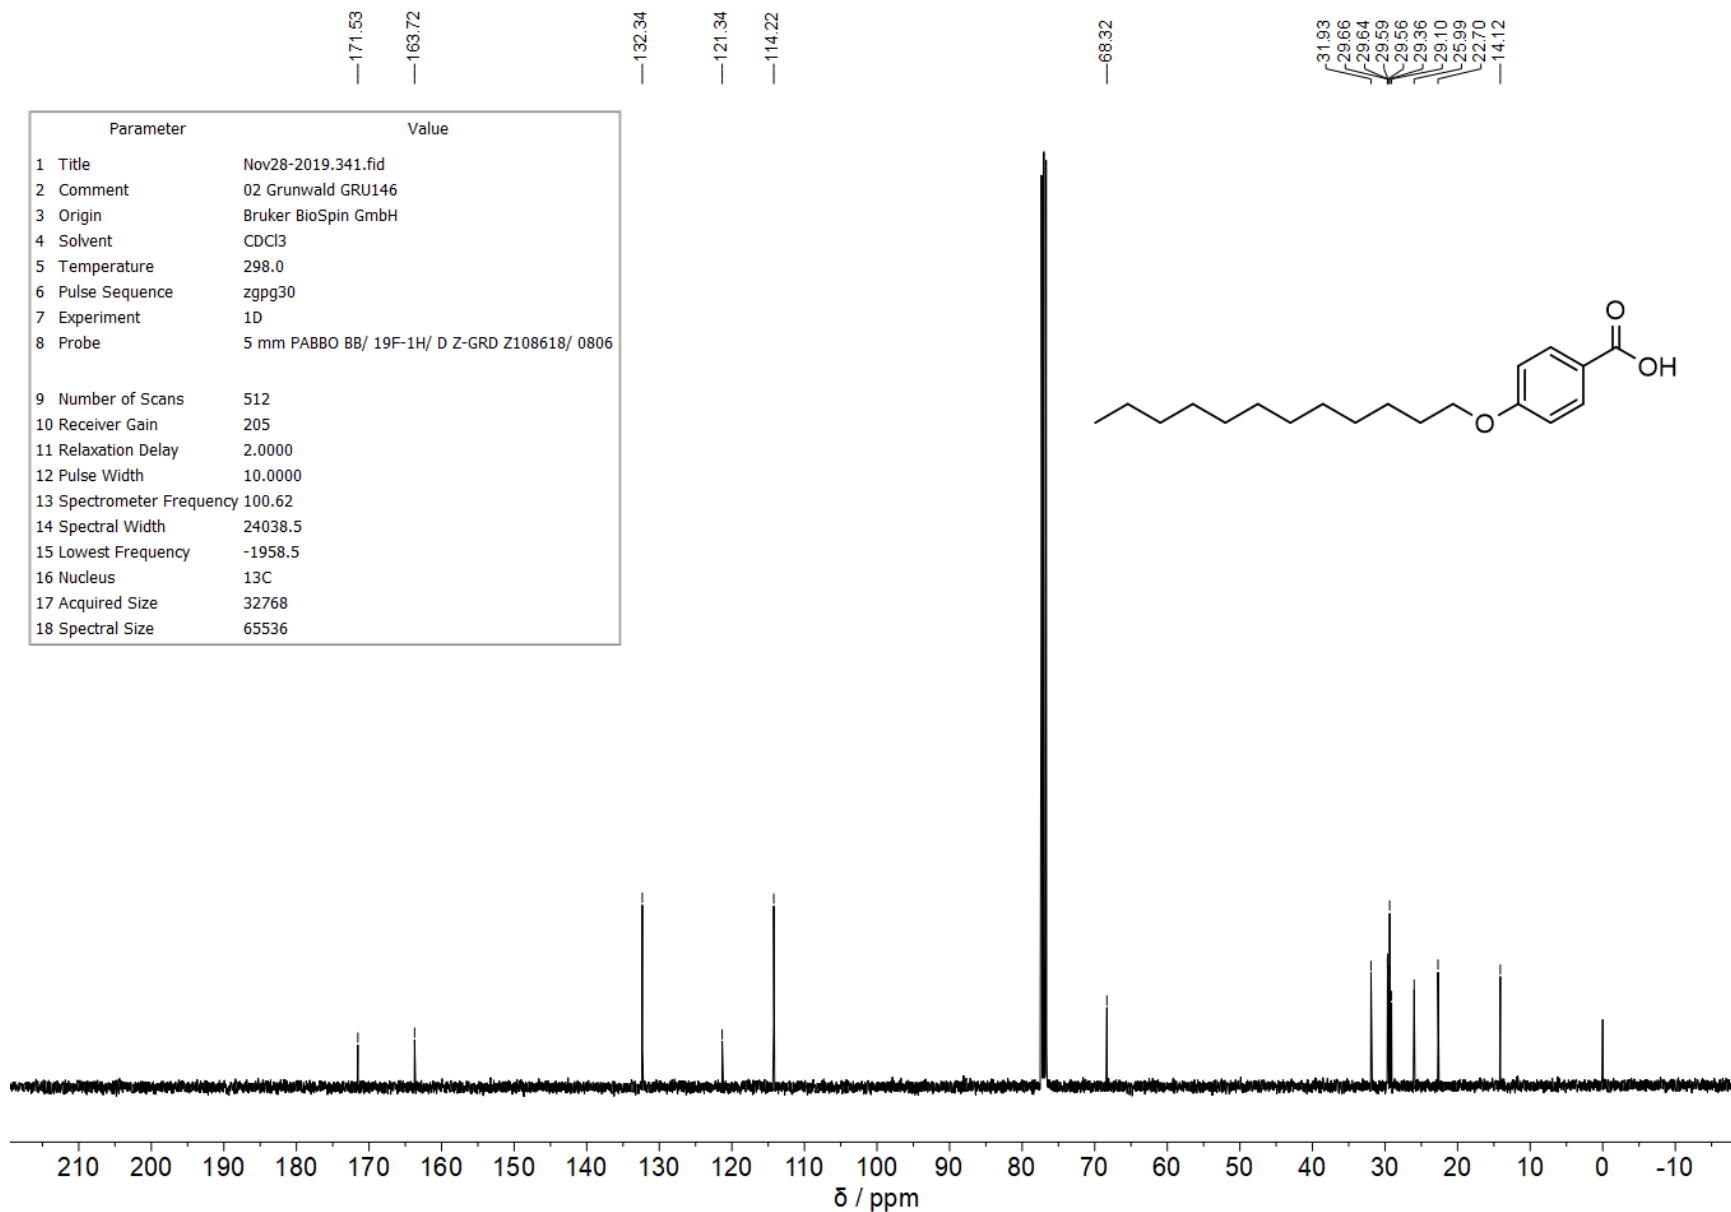

4-C<sup>14</sup>CO<sub>2</sub>H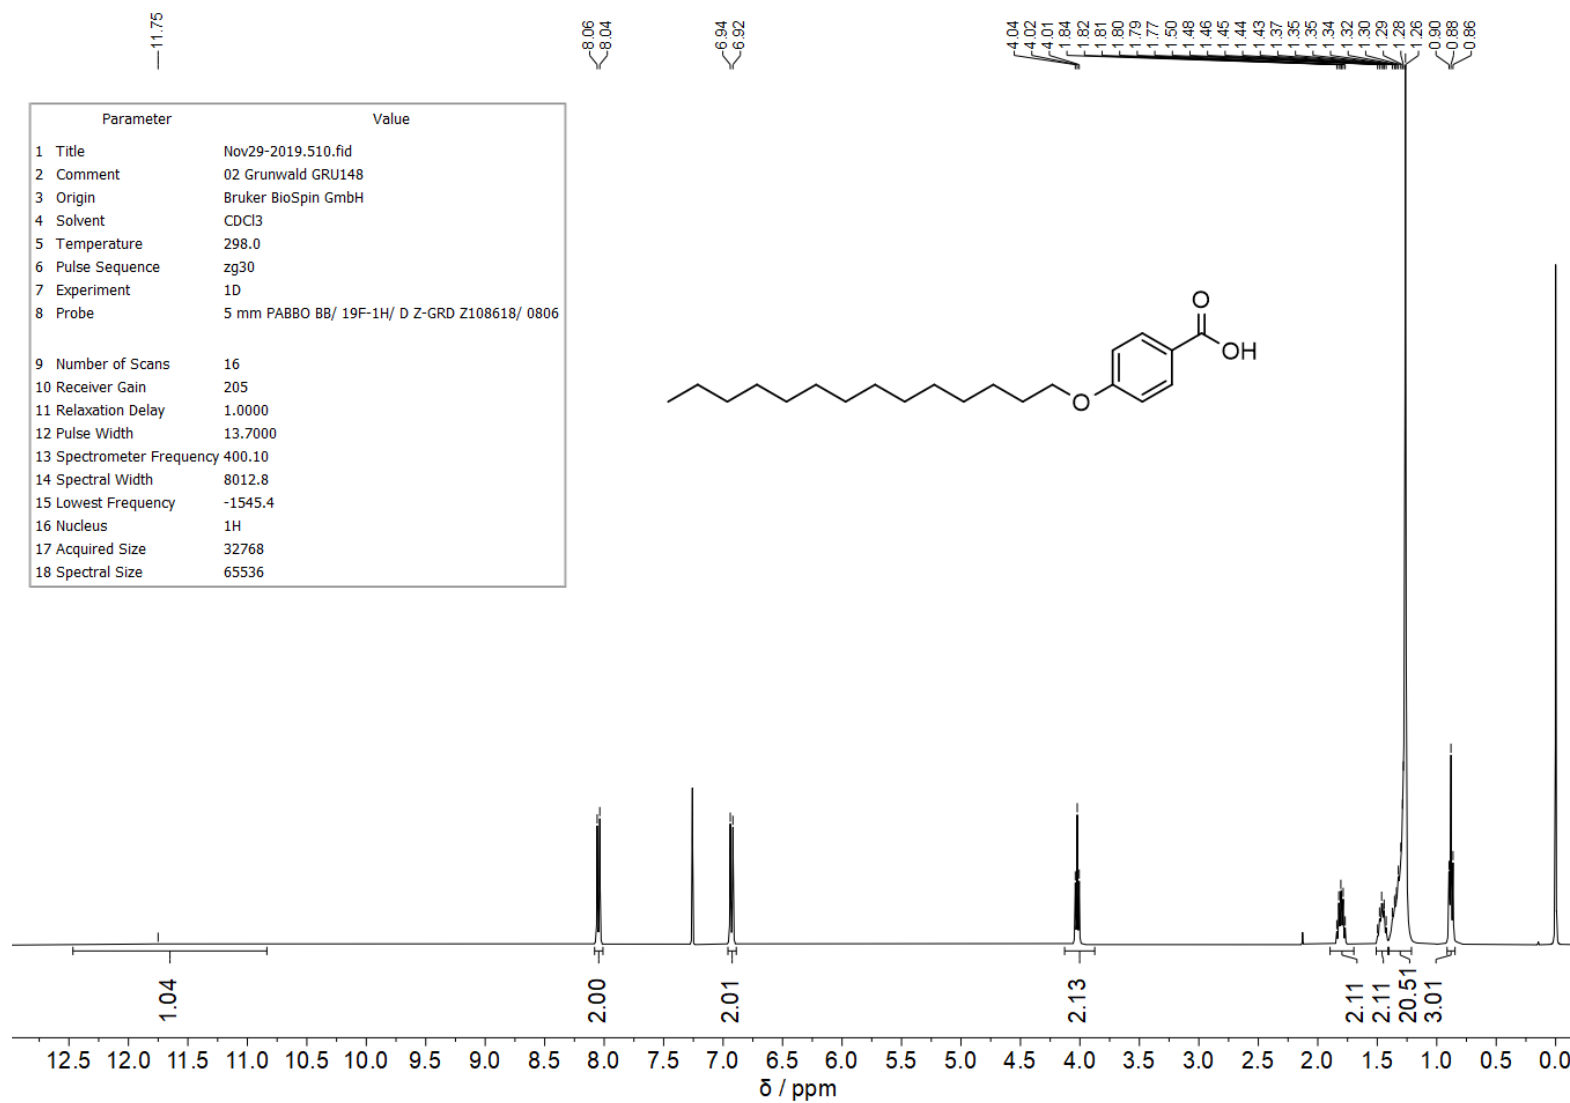

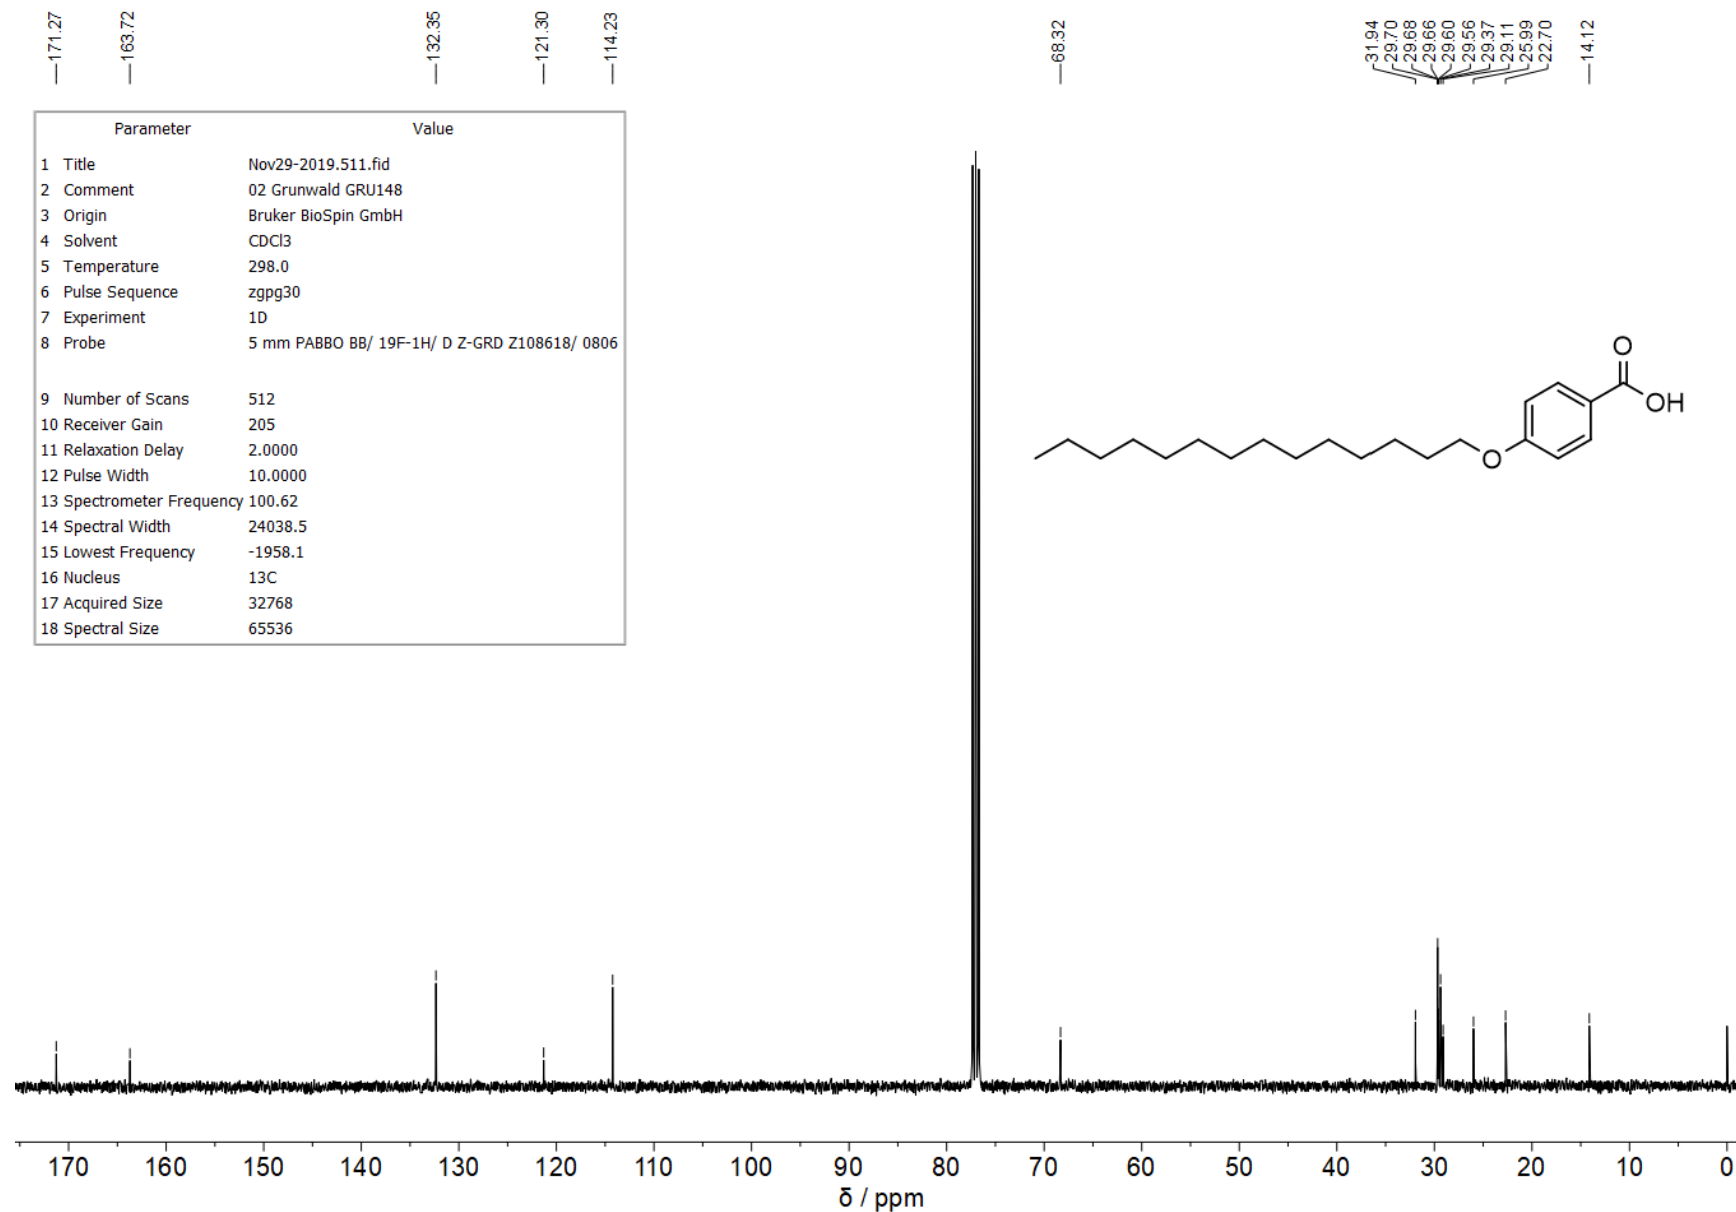

3,4-C<sub>10</sub>CO<sub>2</sub>H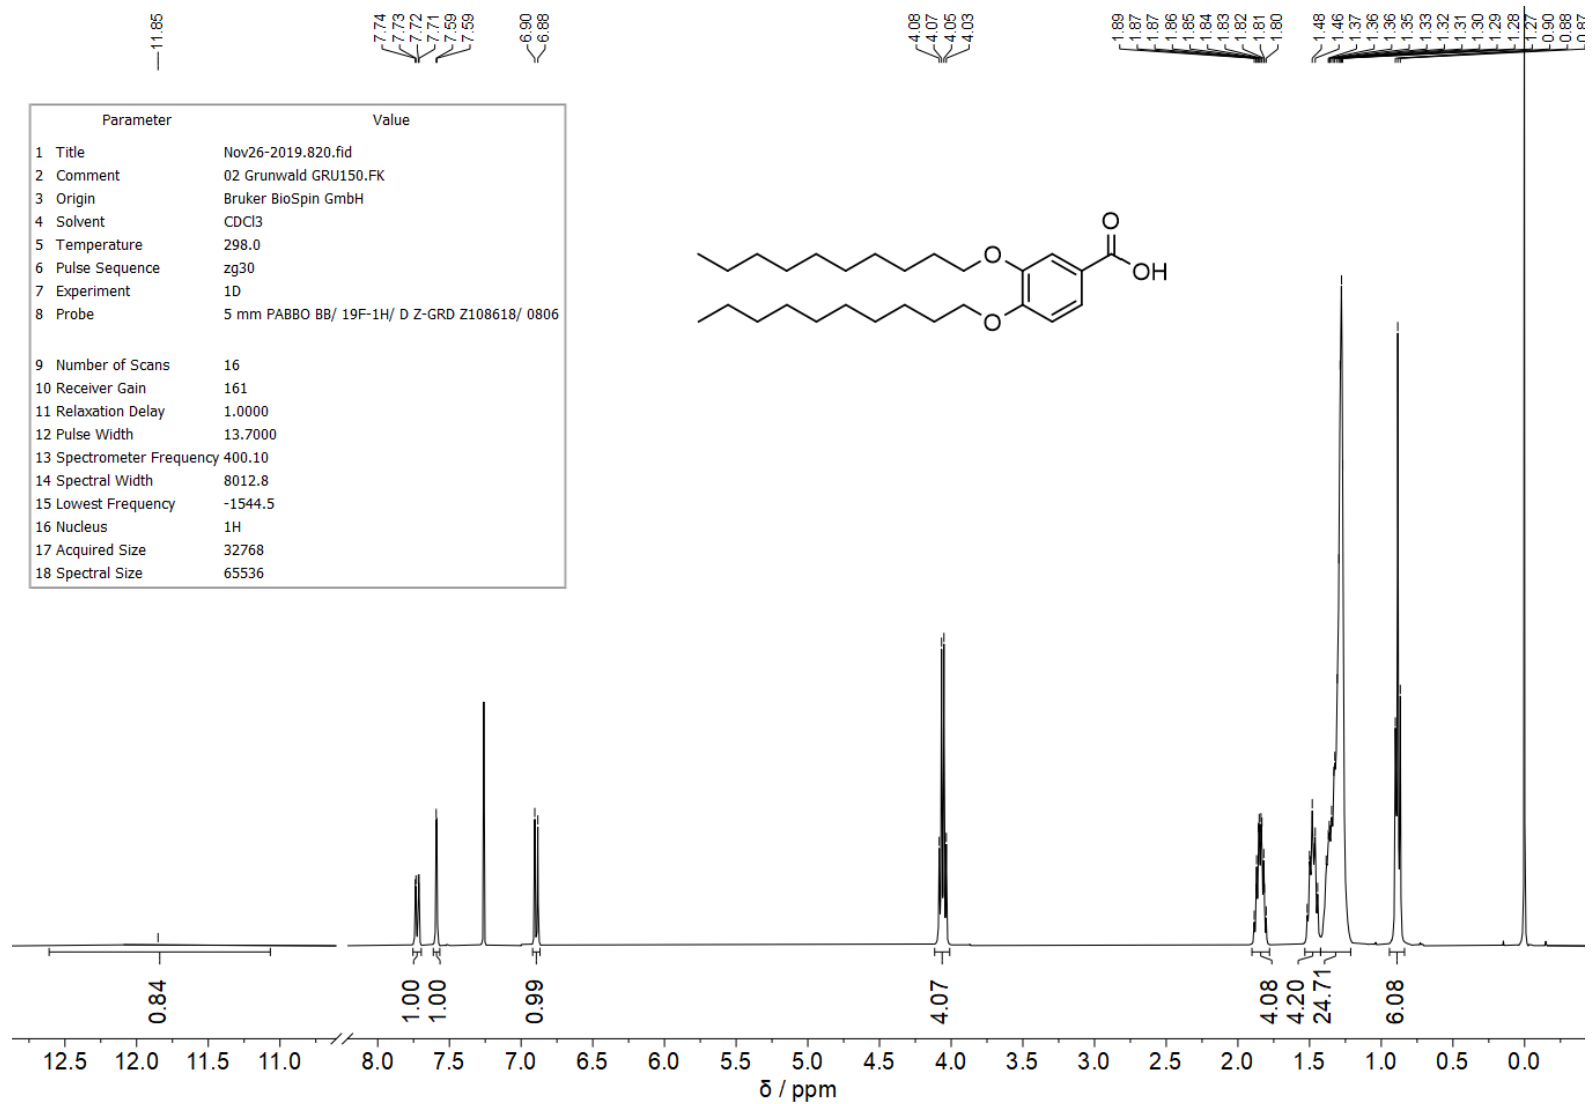

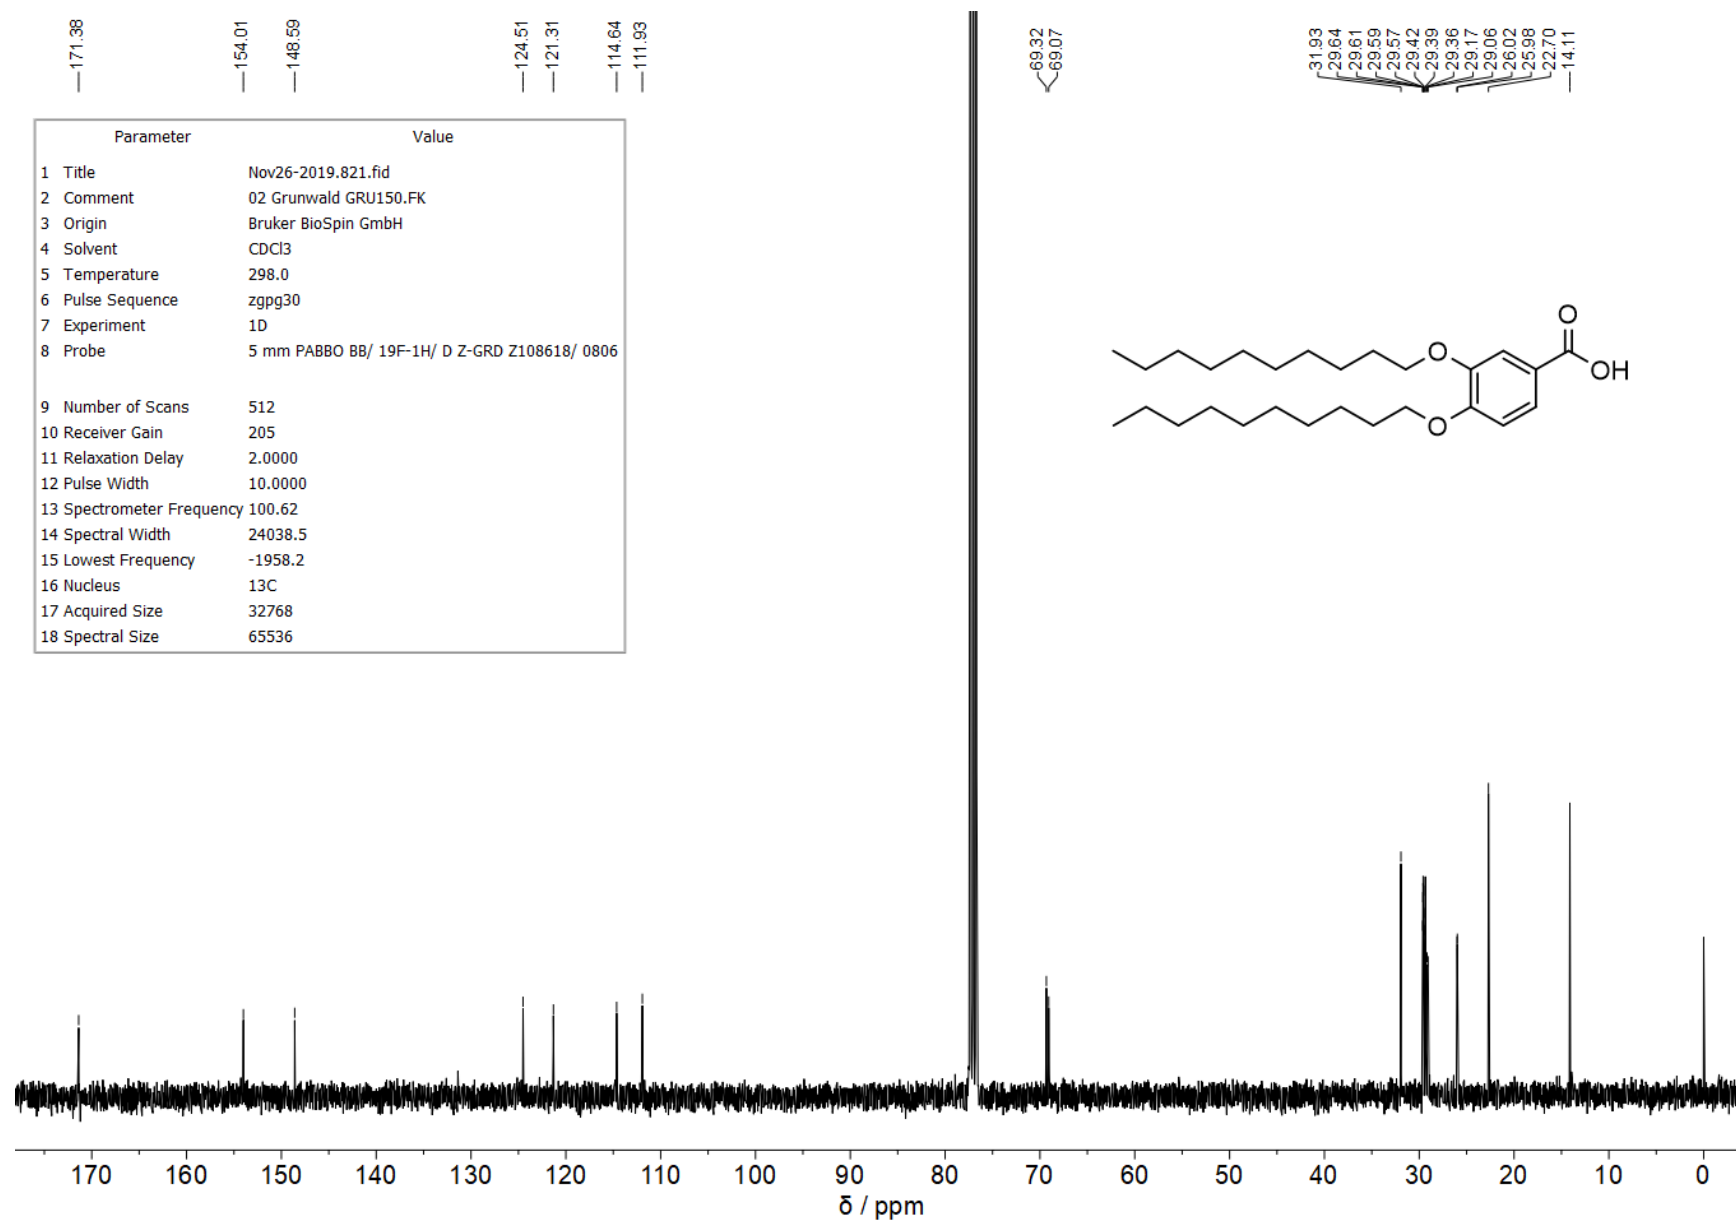

3,4-C<sub>12</sub>CO<sub>2</sub>H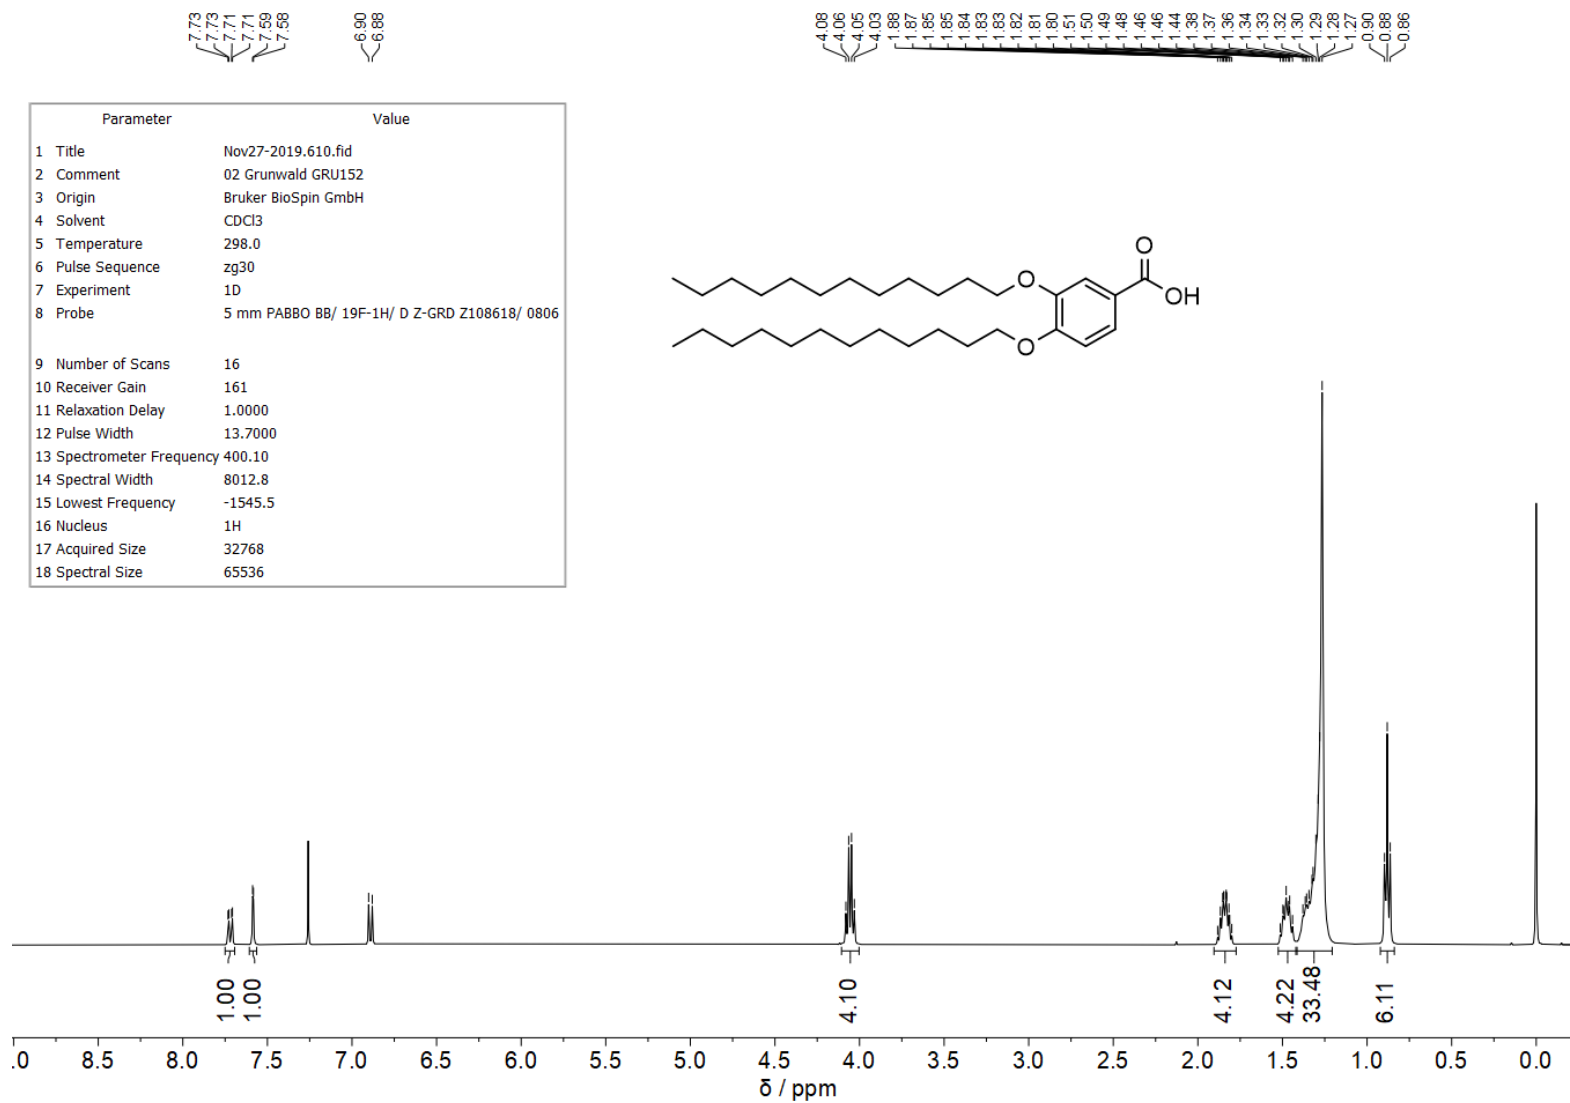

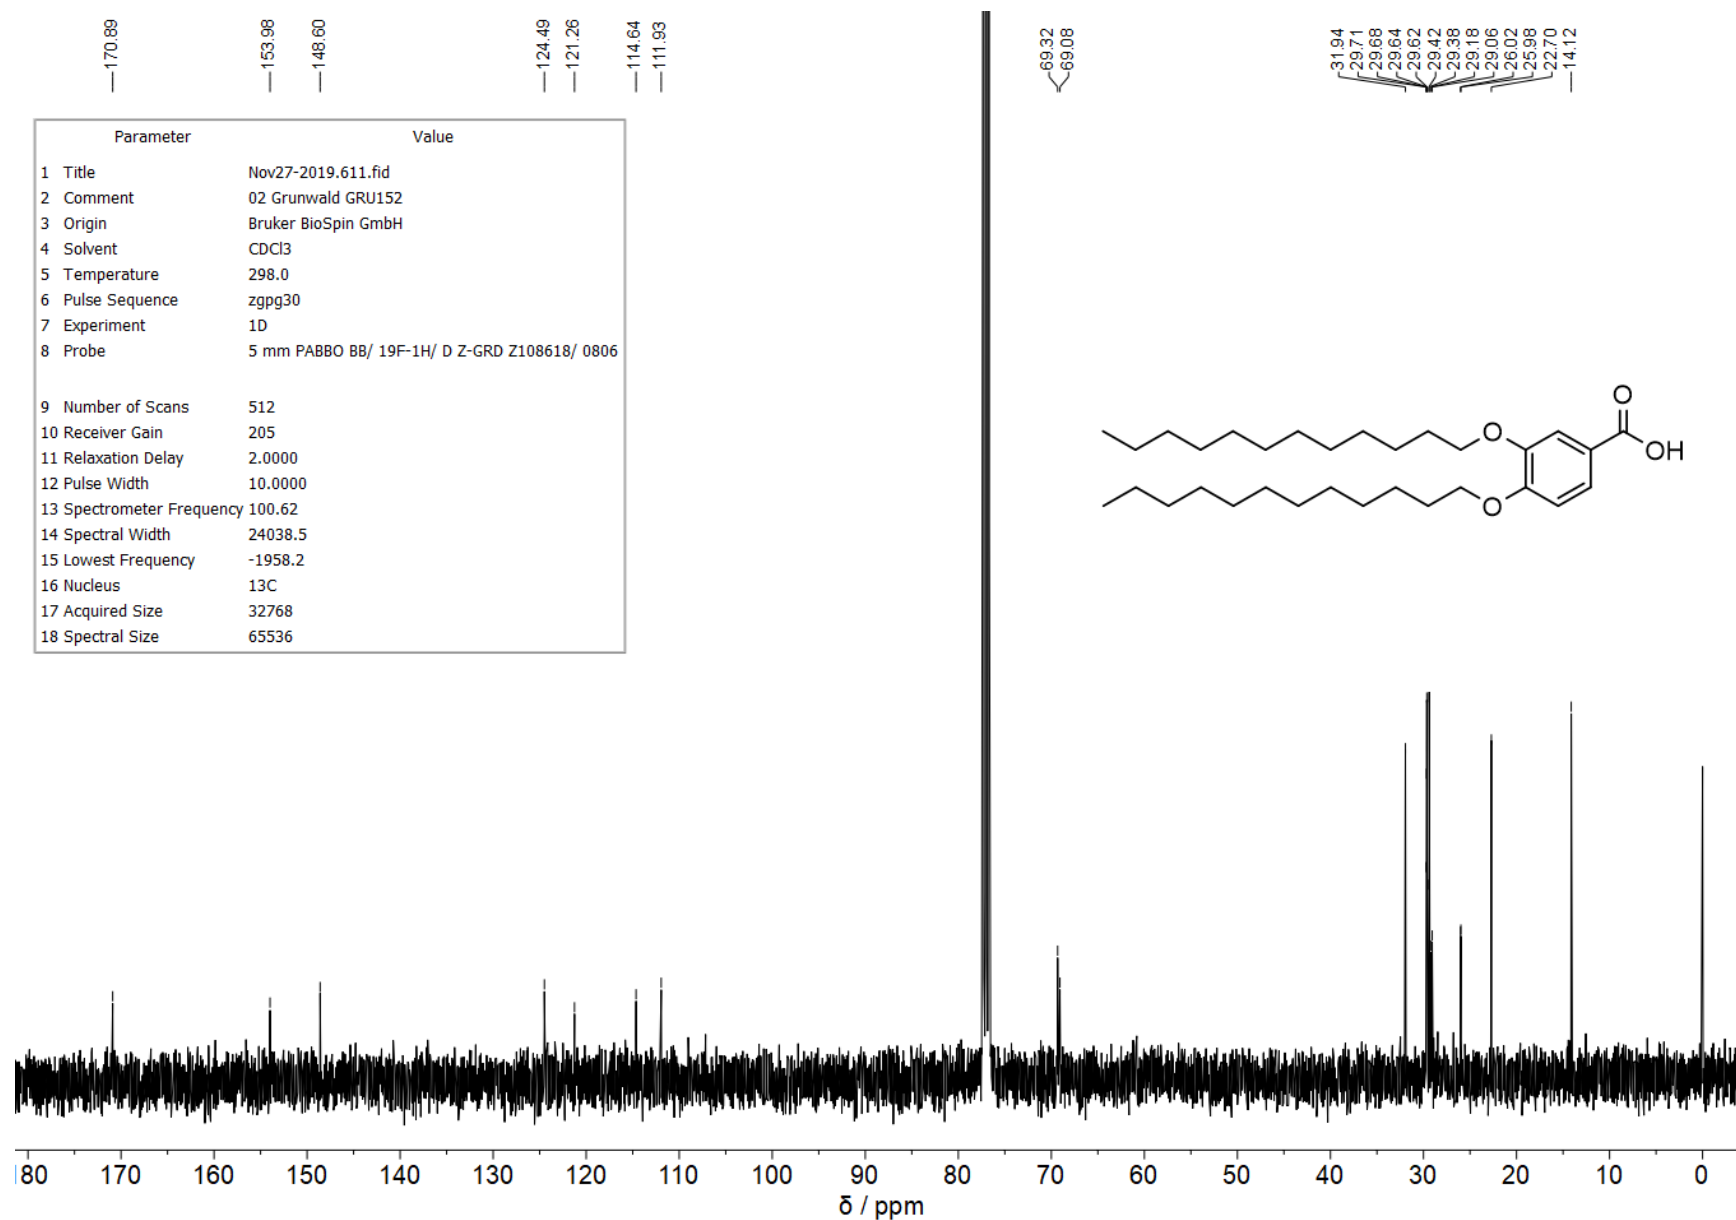

3,4-C<sub>14</sub>CO<sub>2</sub>H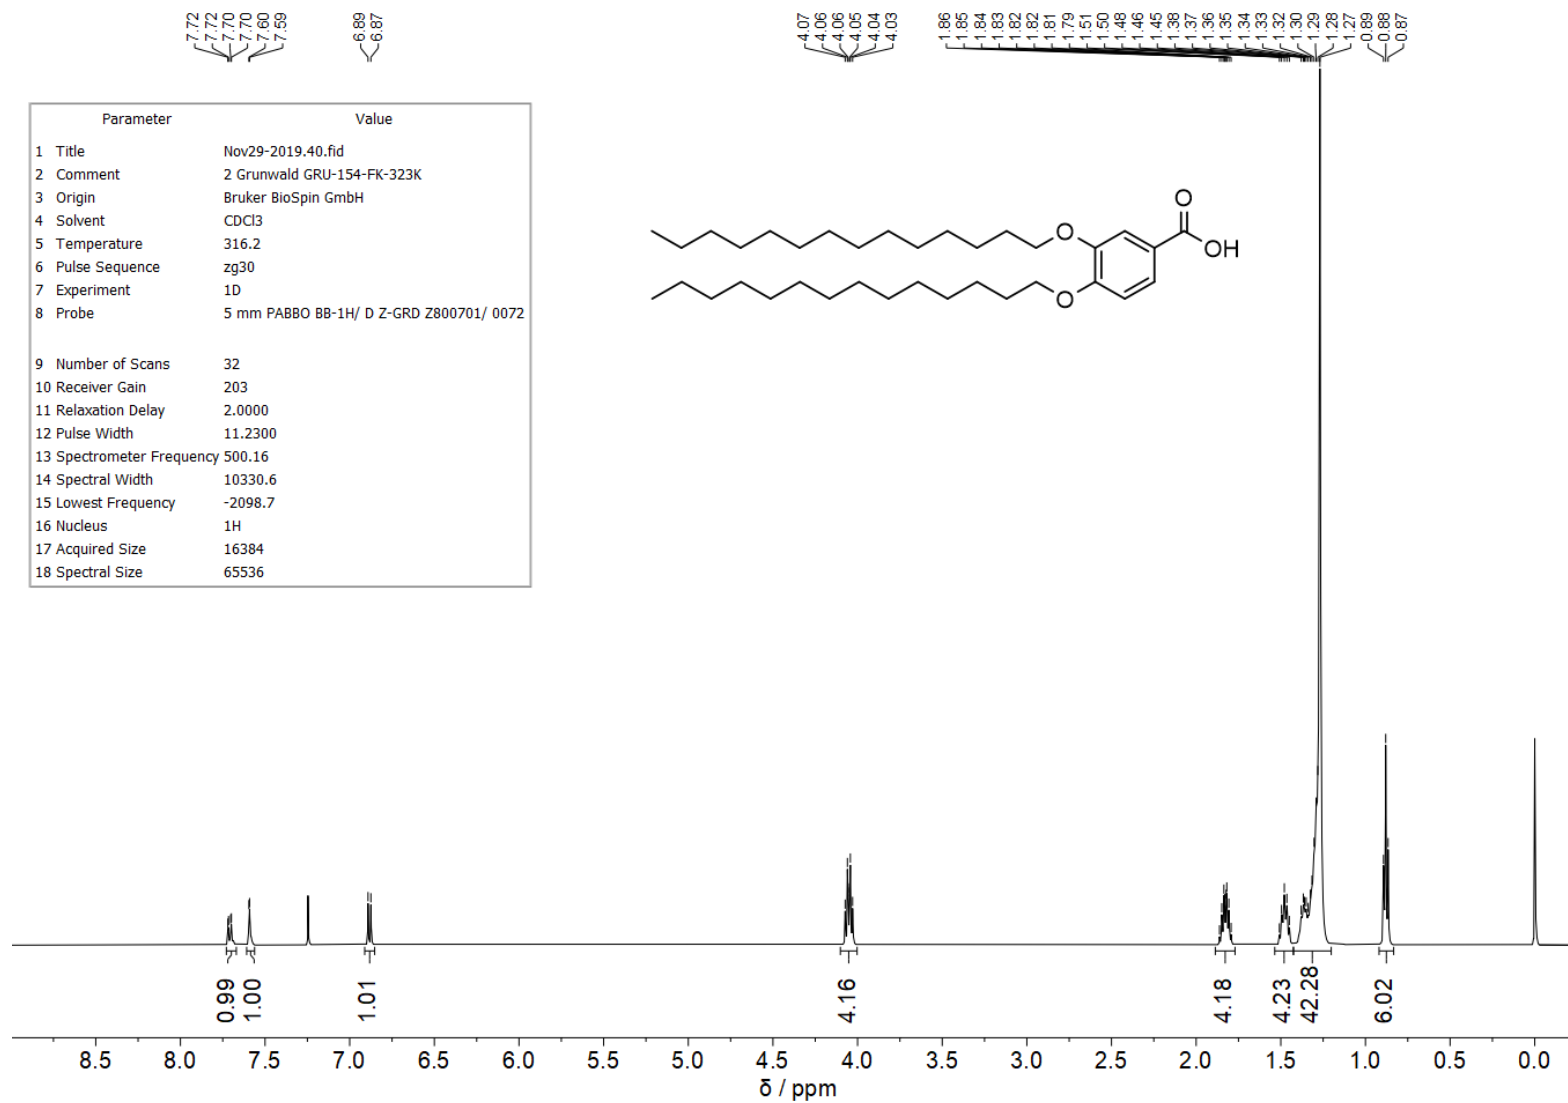



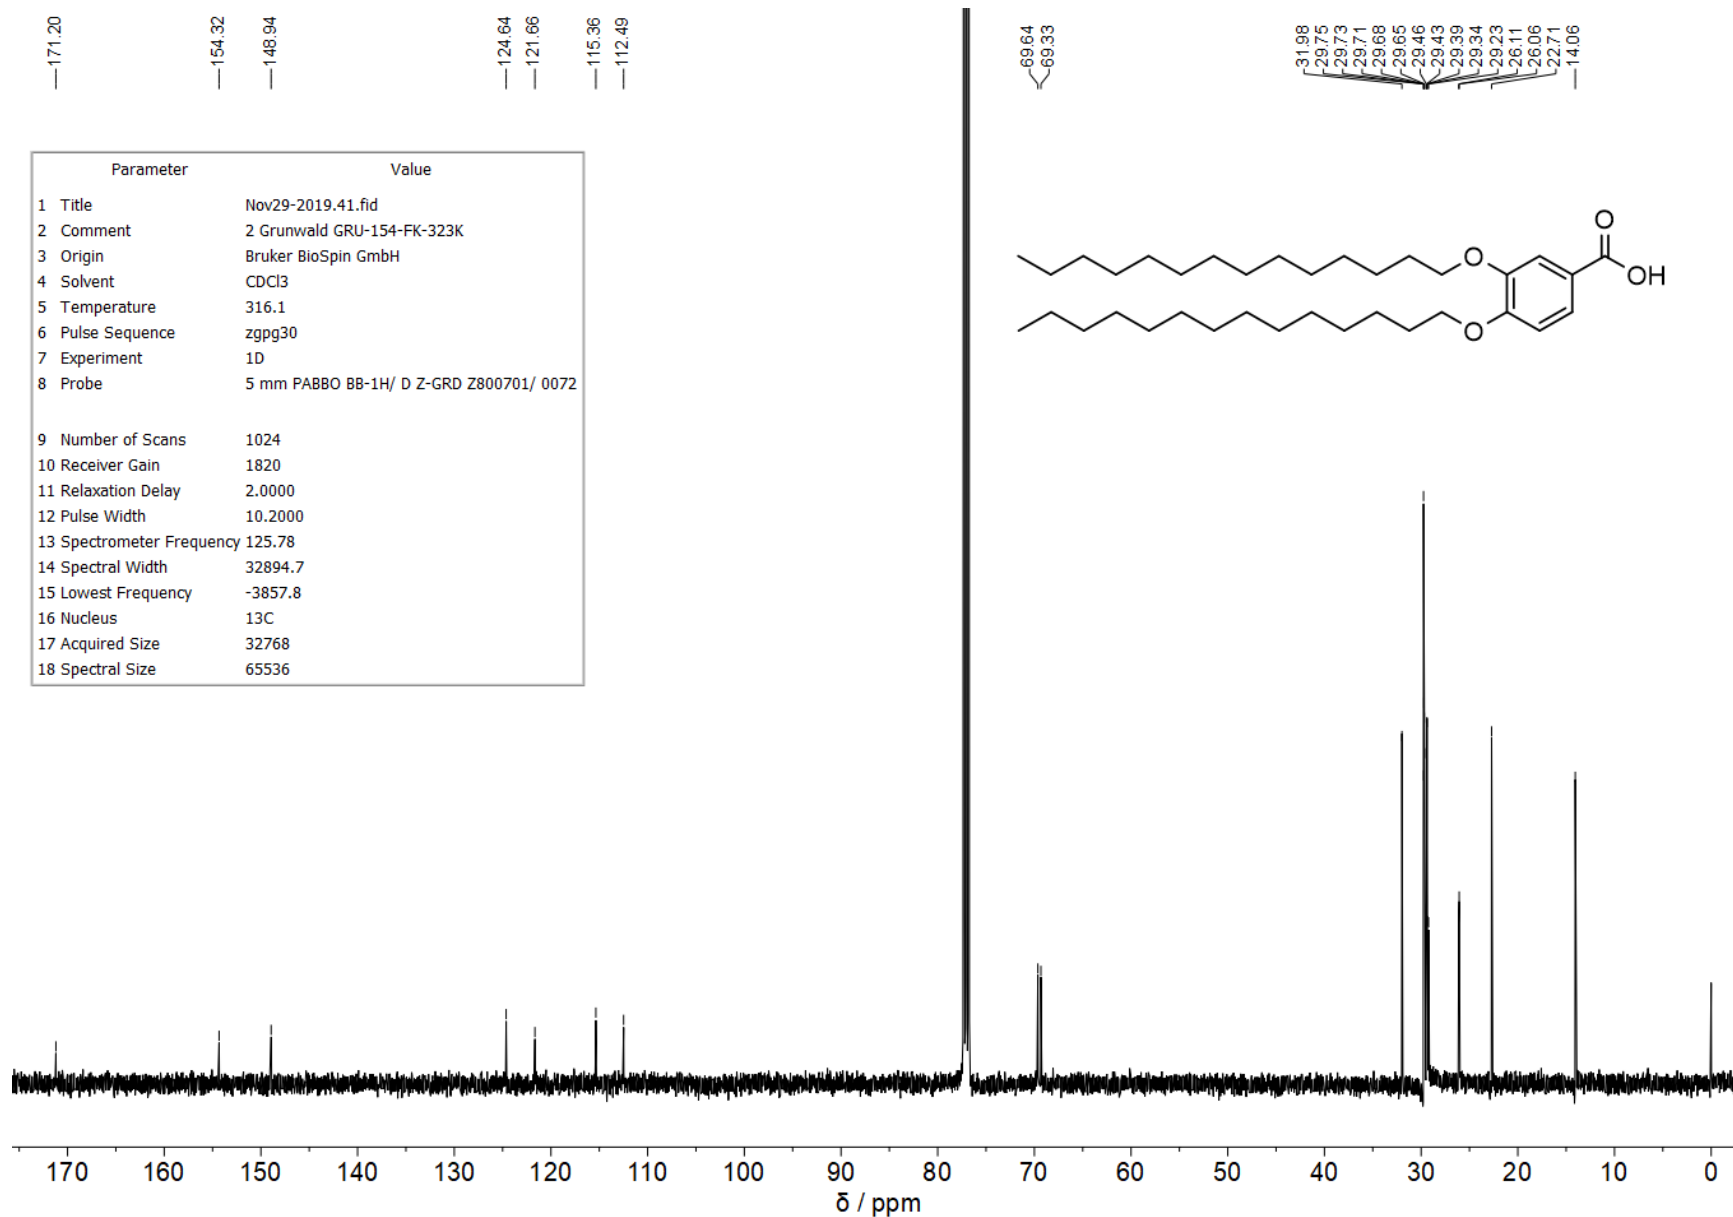

3,5-C<sub>10</sub>CO<sub>2</sub>H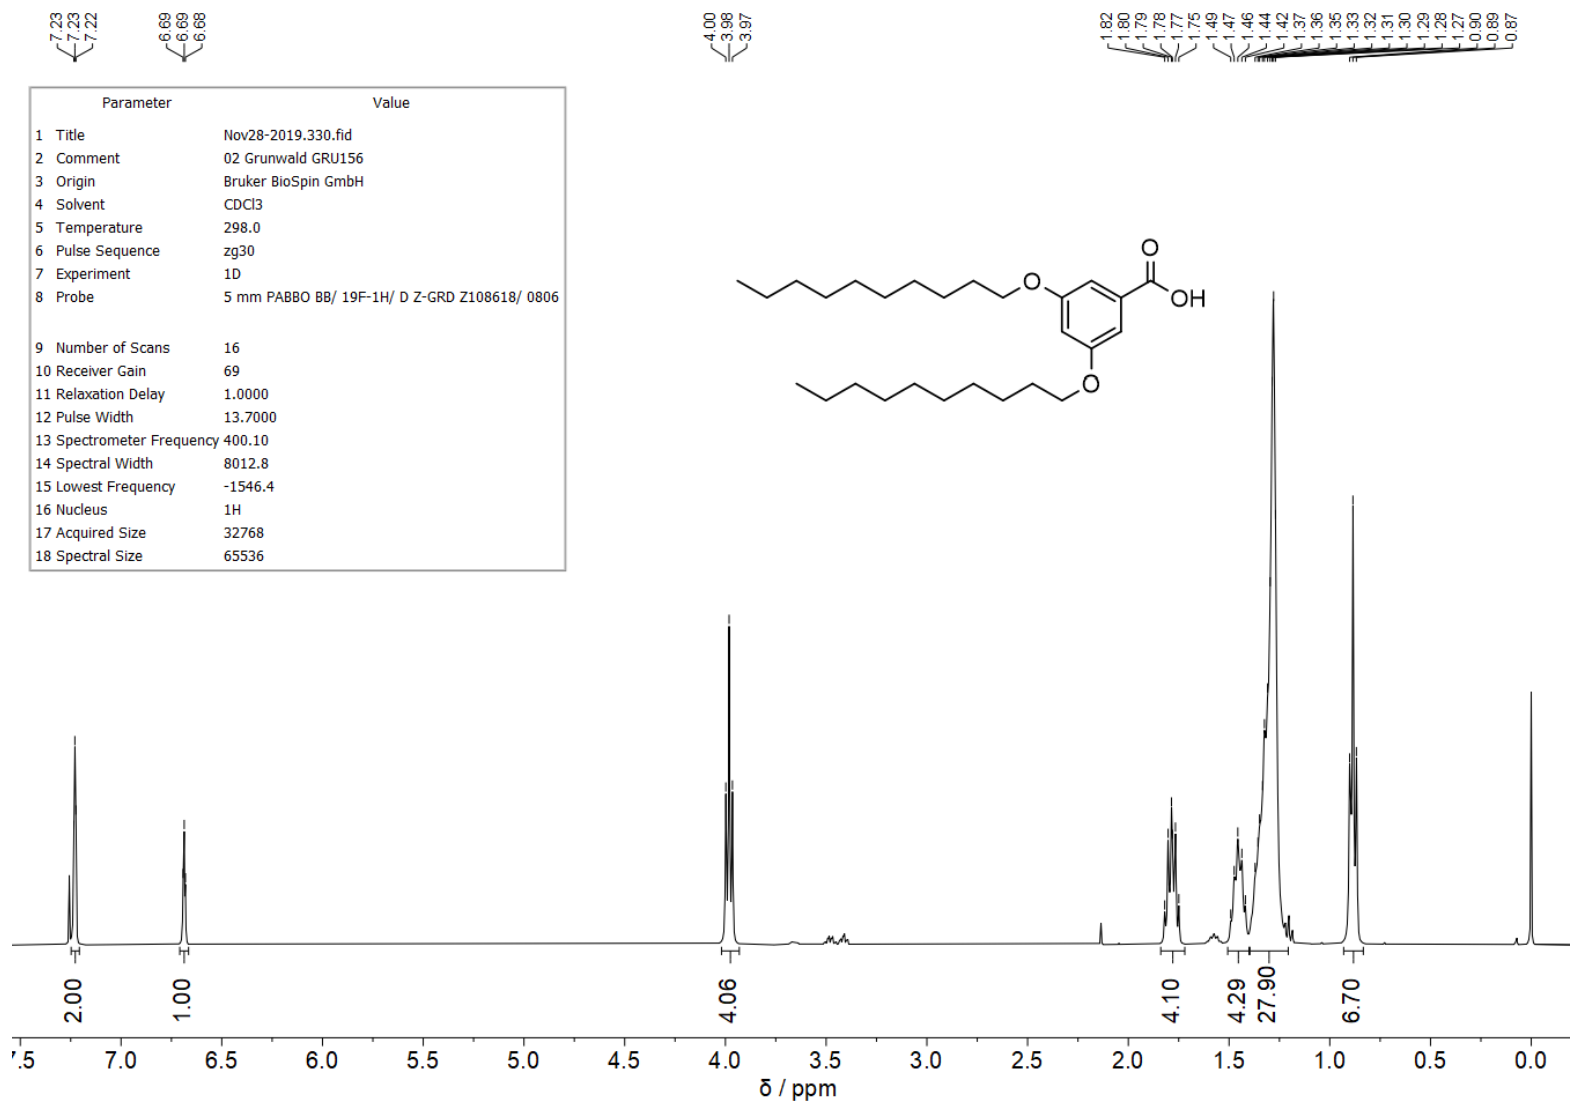

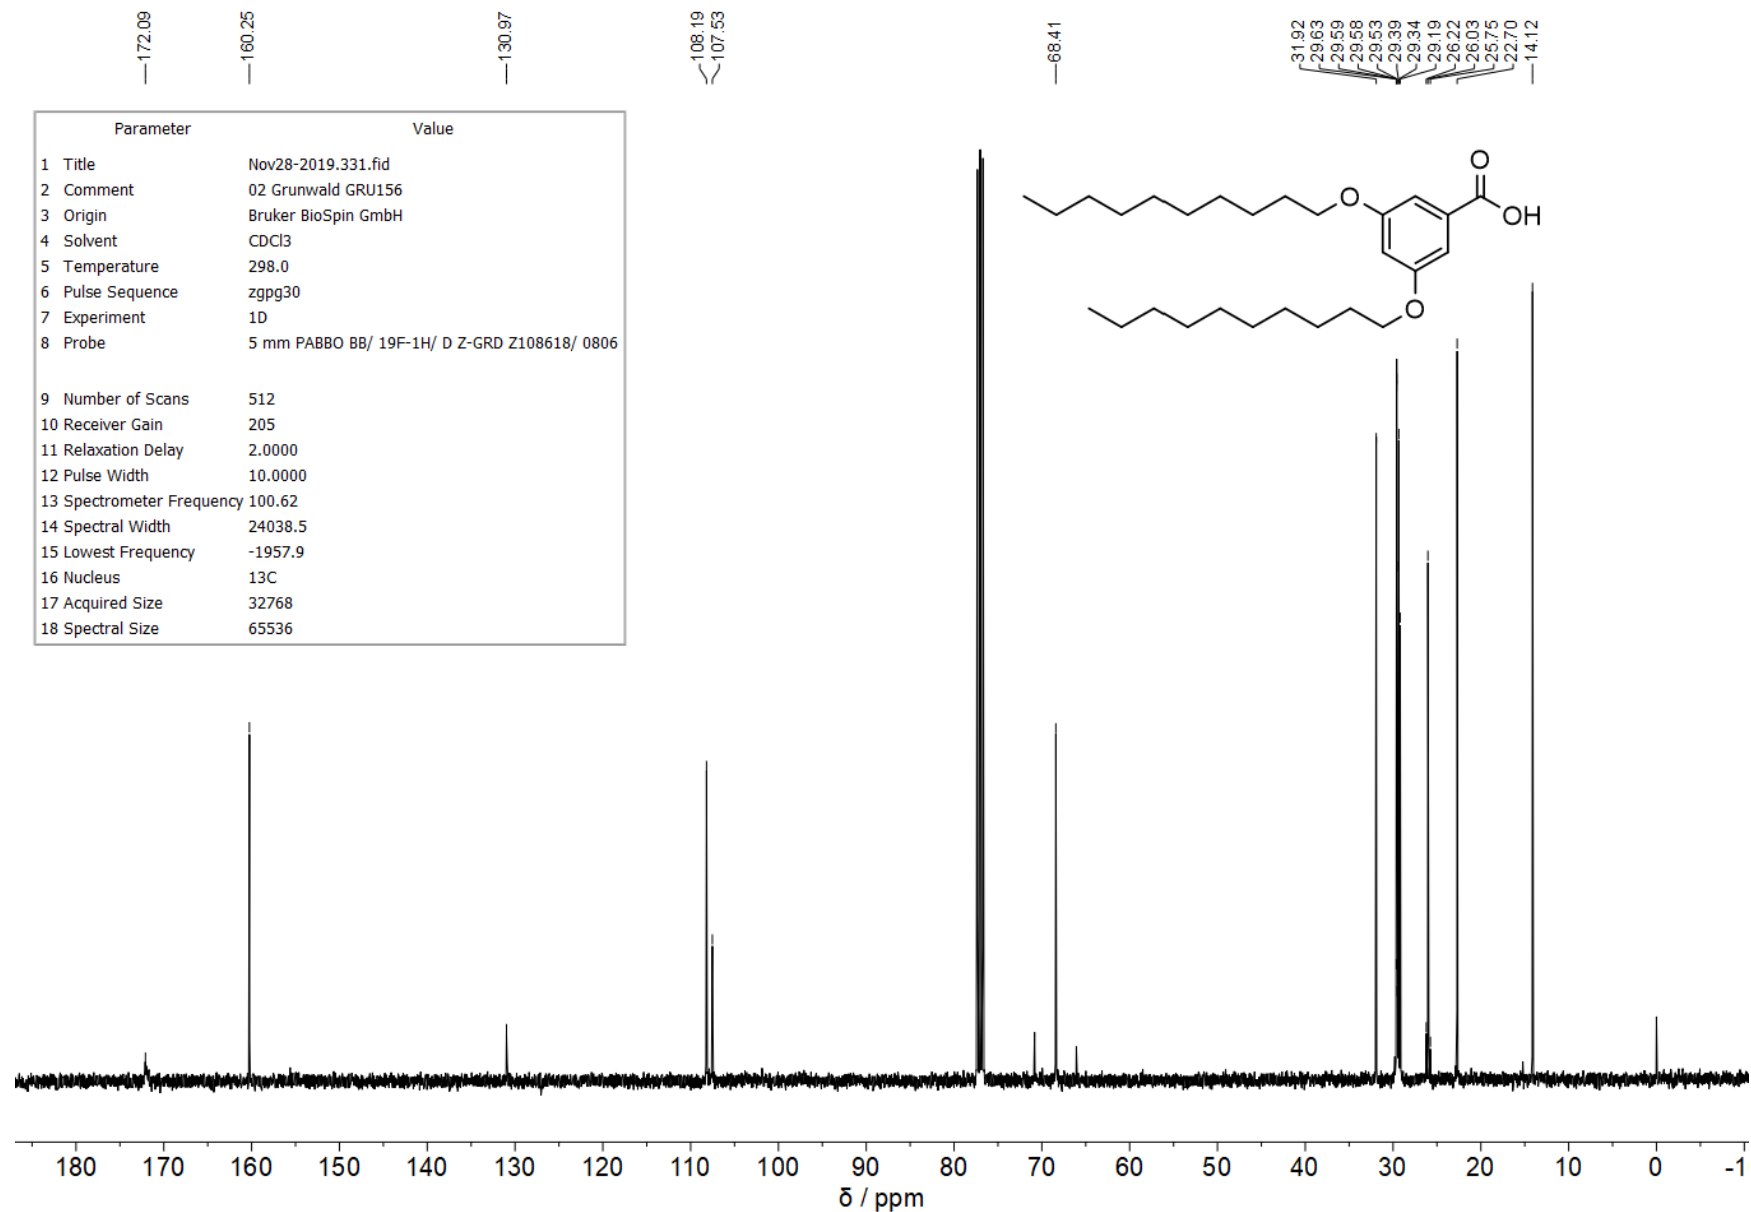

## 3,5-C12CO2H

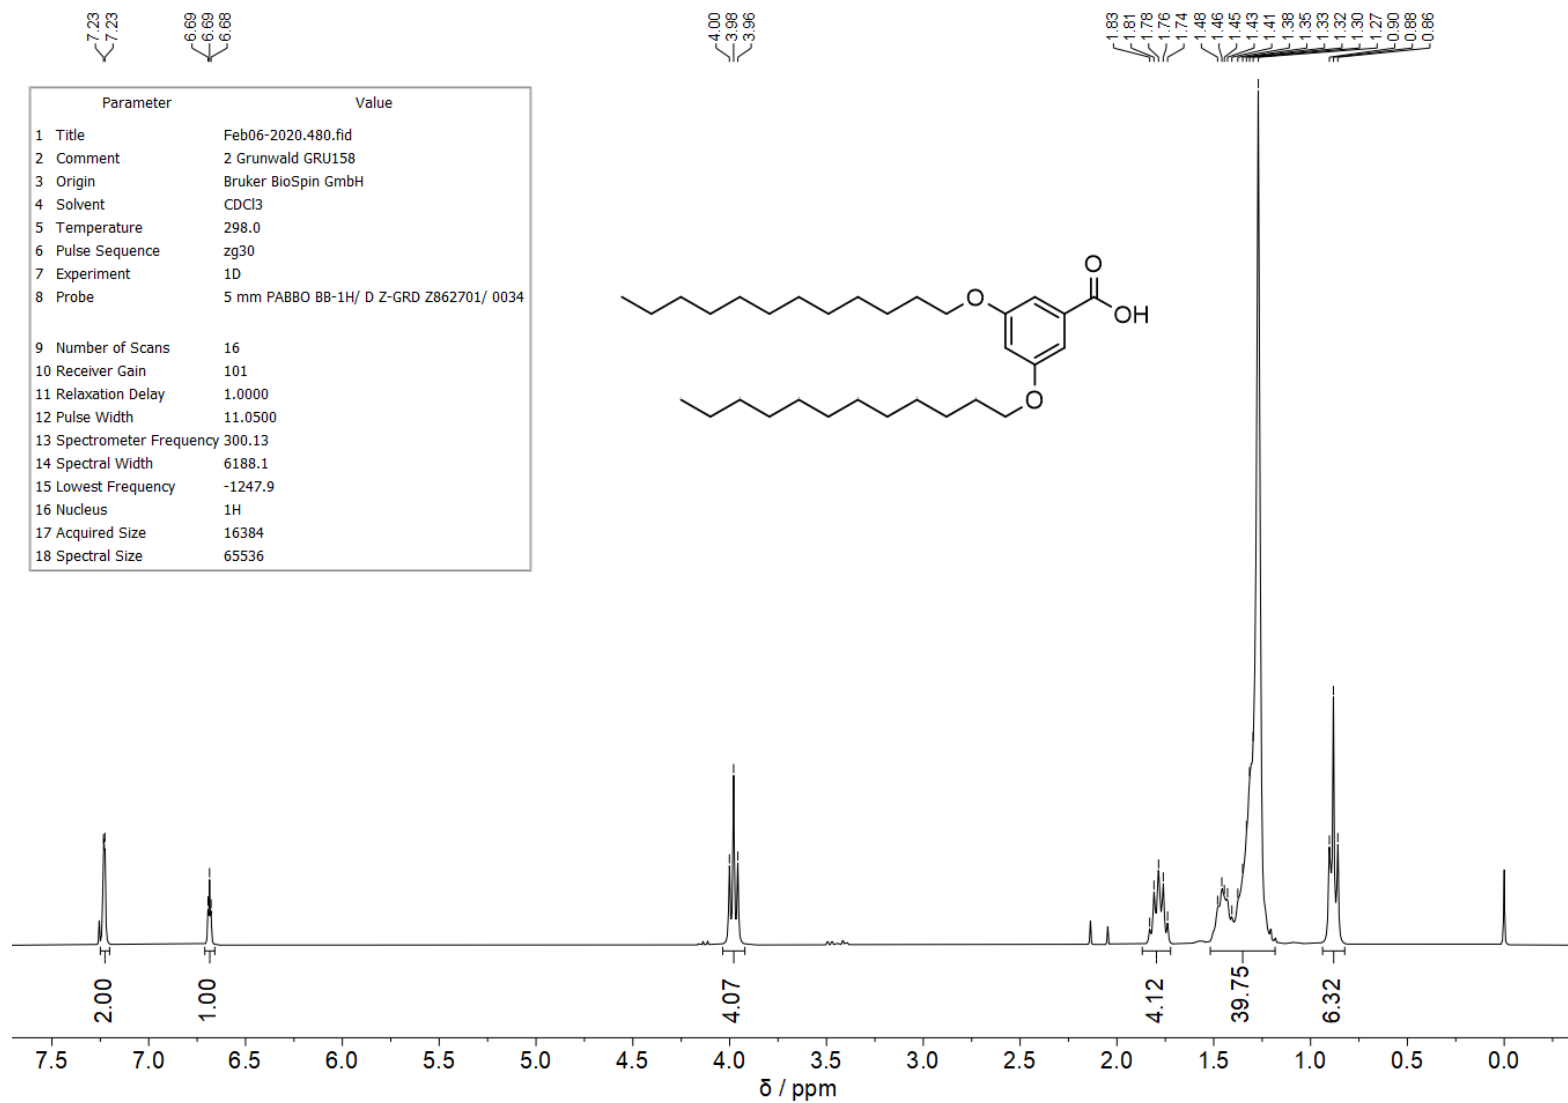

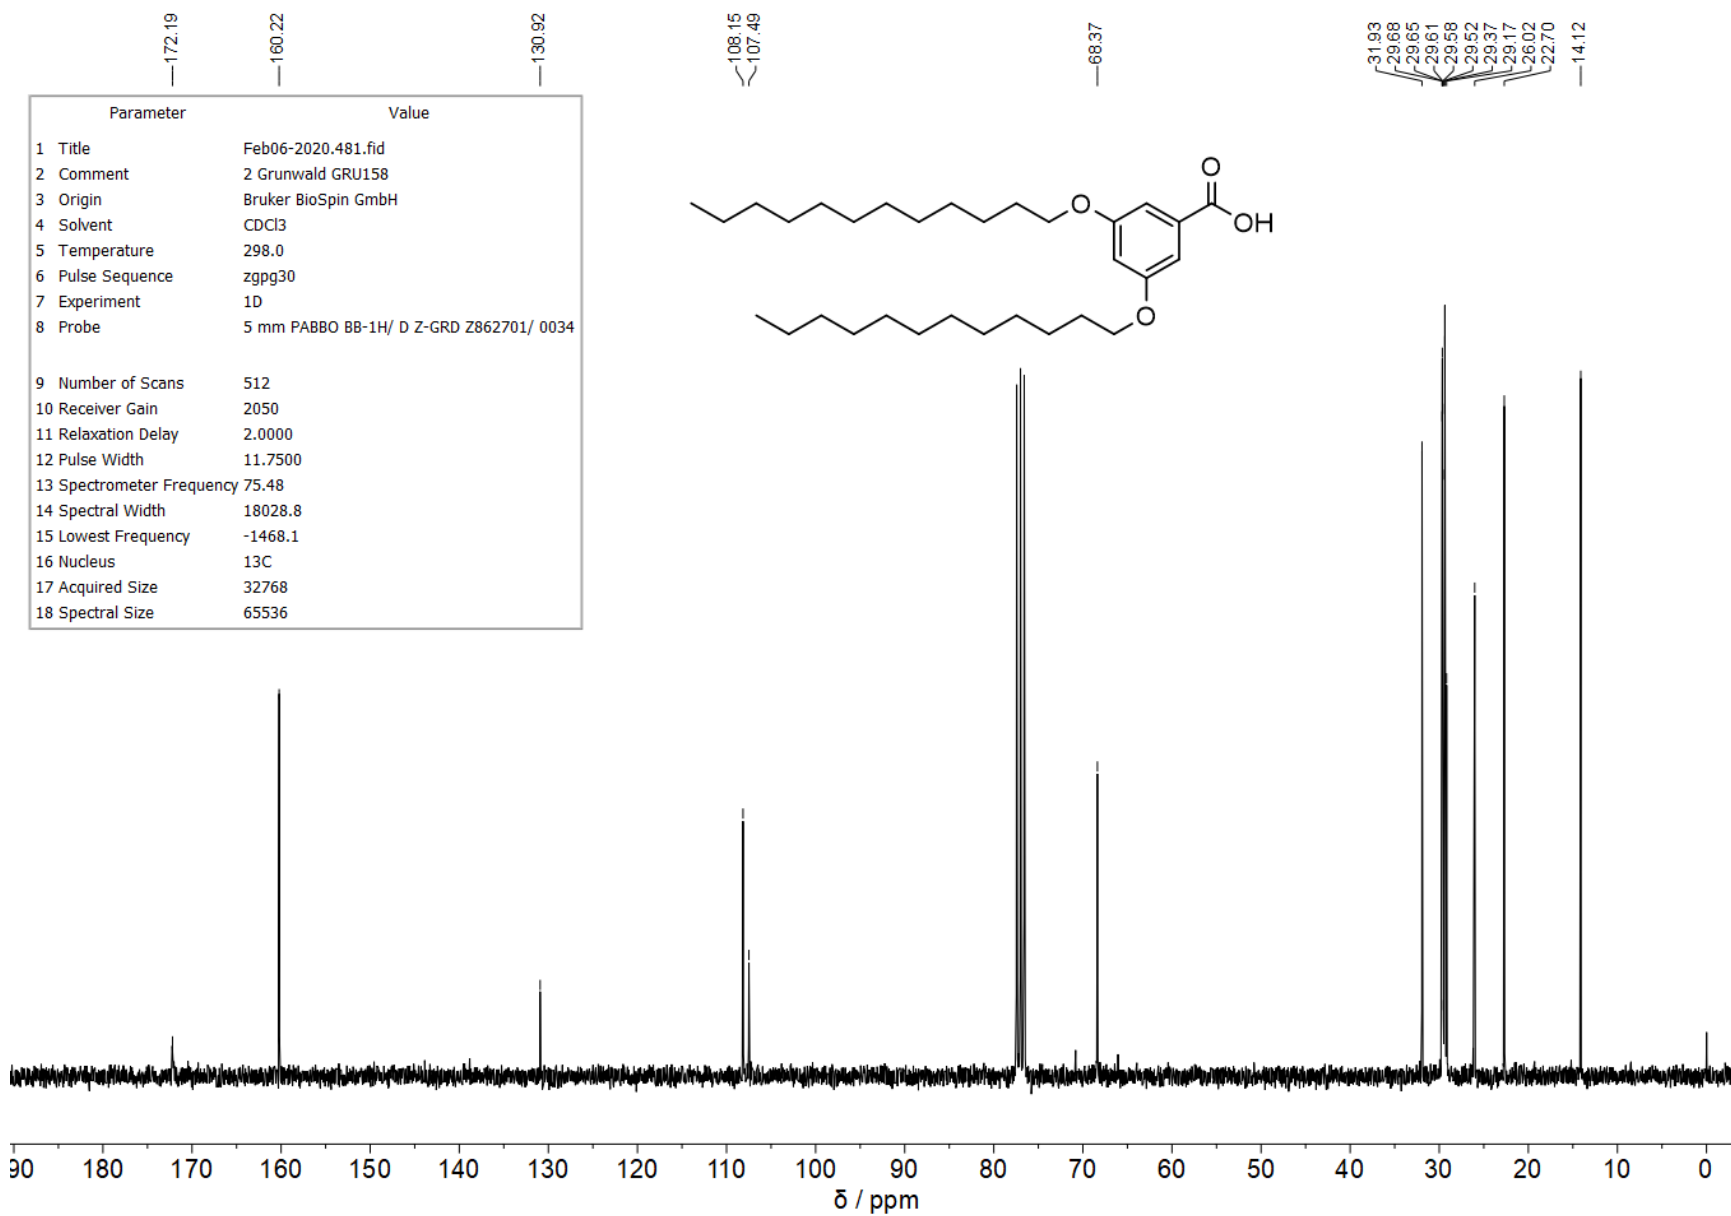

## 3,5-C14CO2H

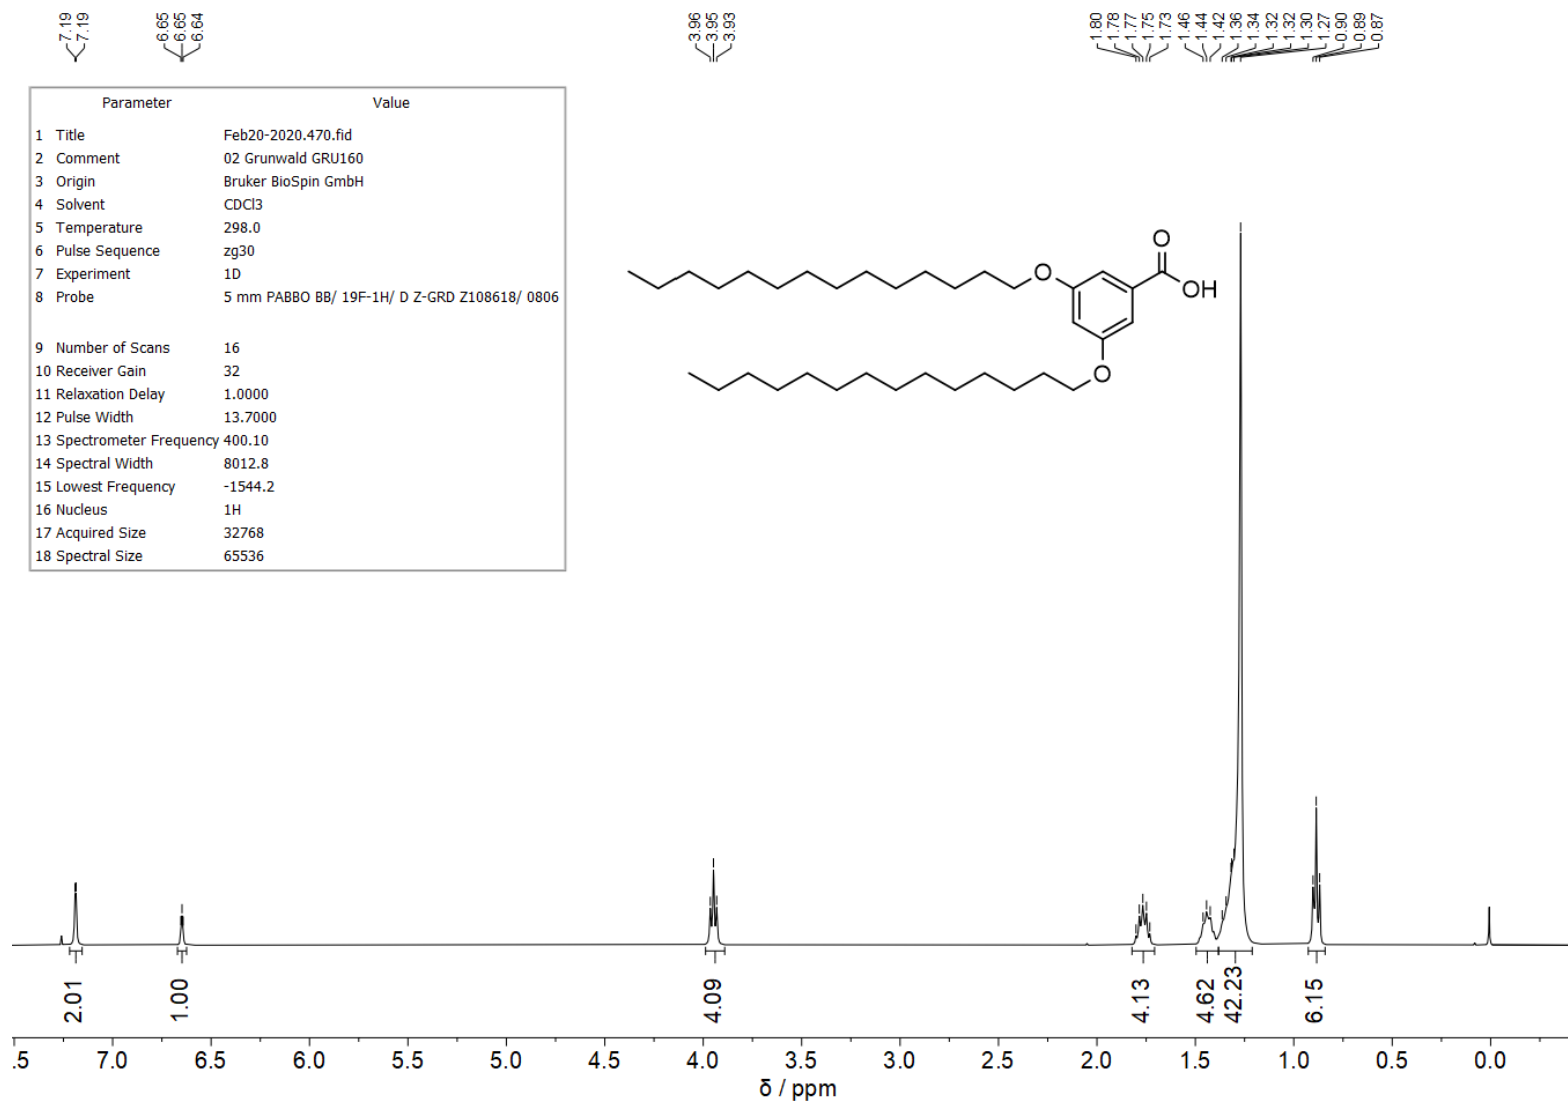

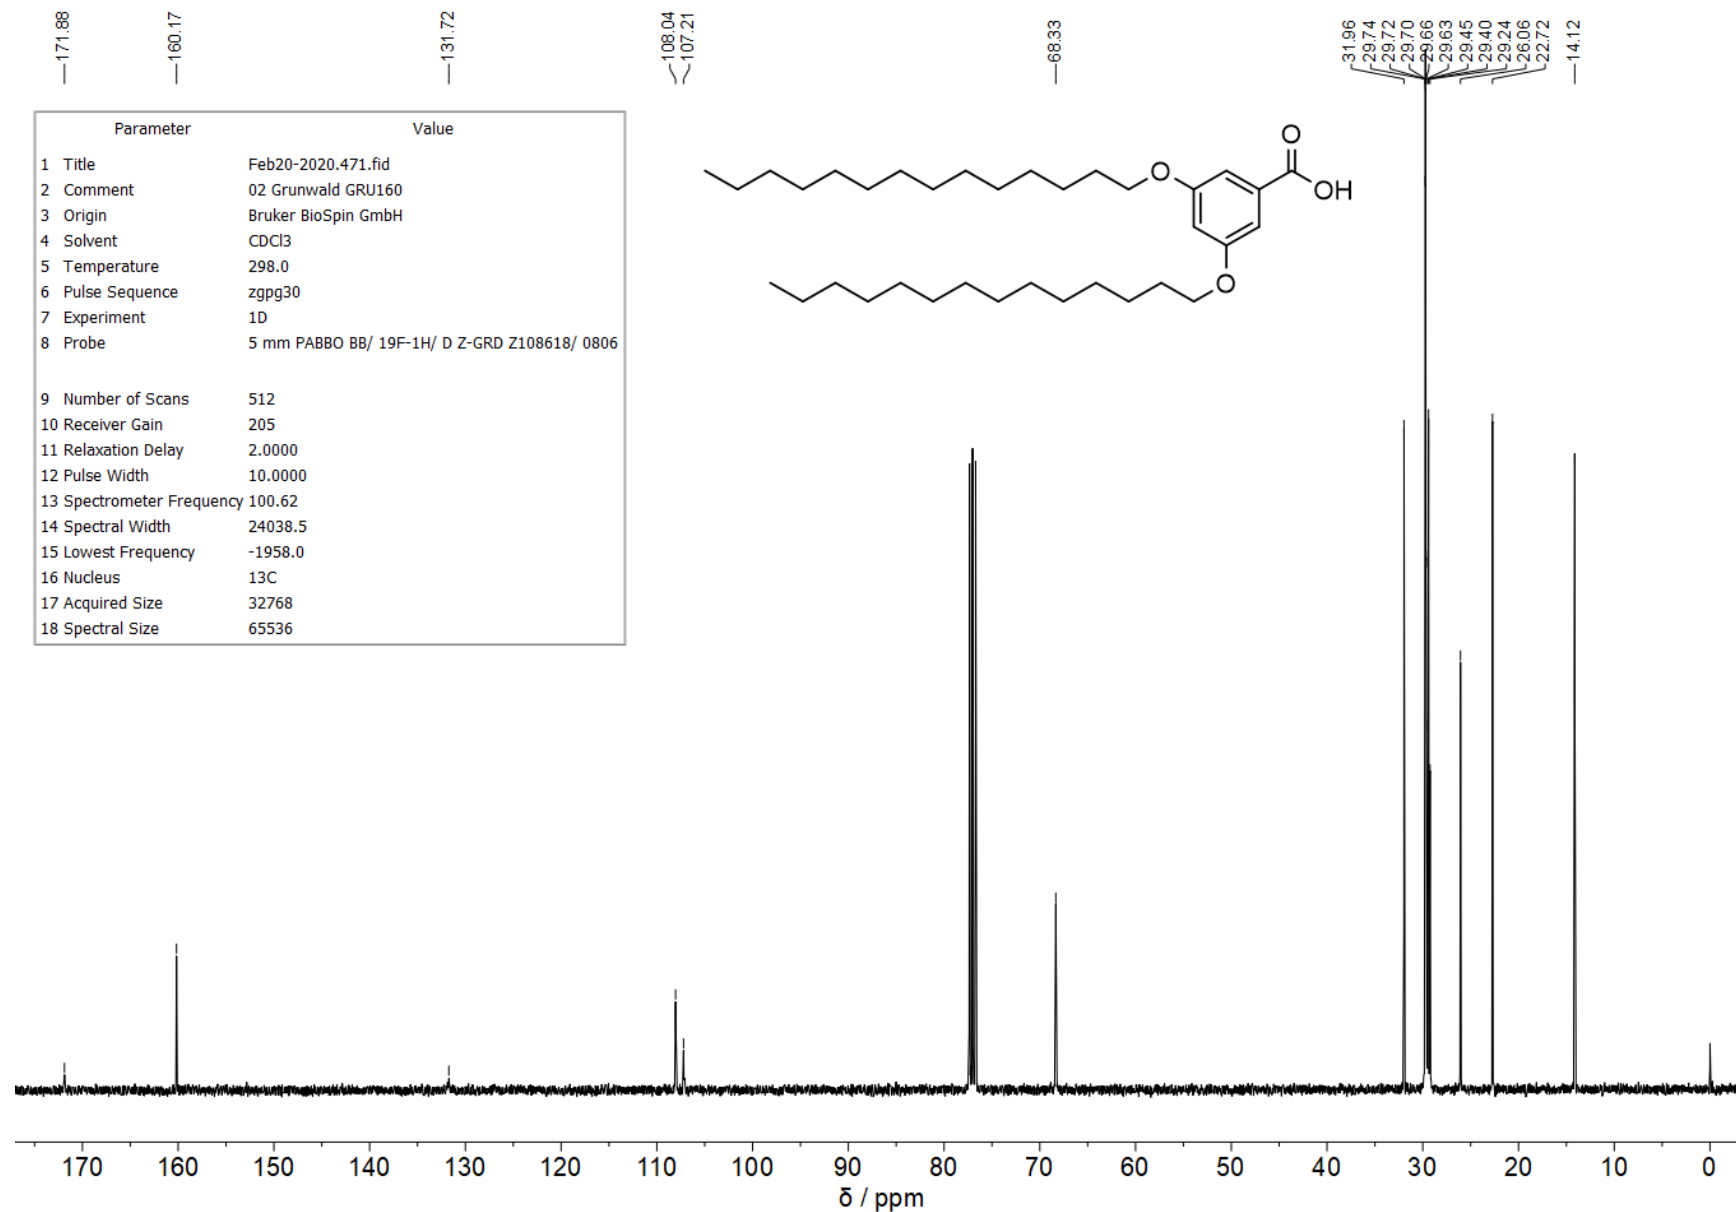

3,4,5-C<sub>10</sub>CO<sub>2</sub>H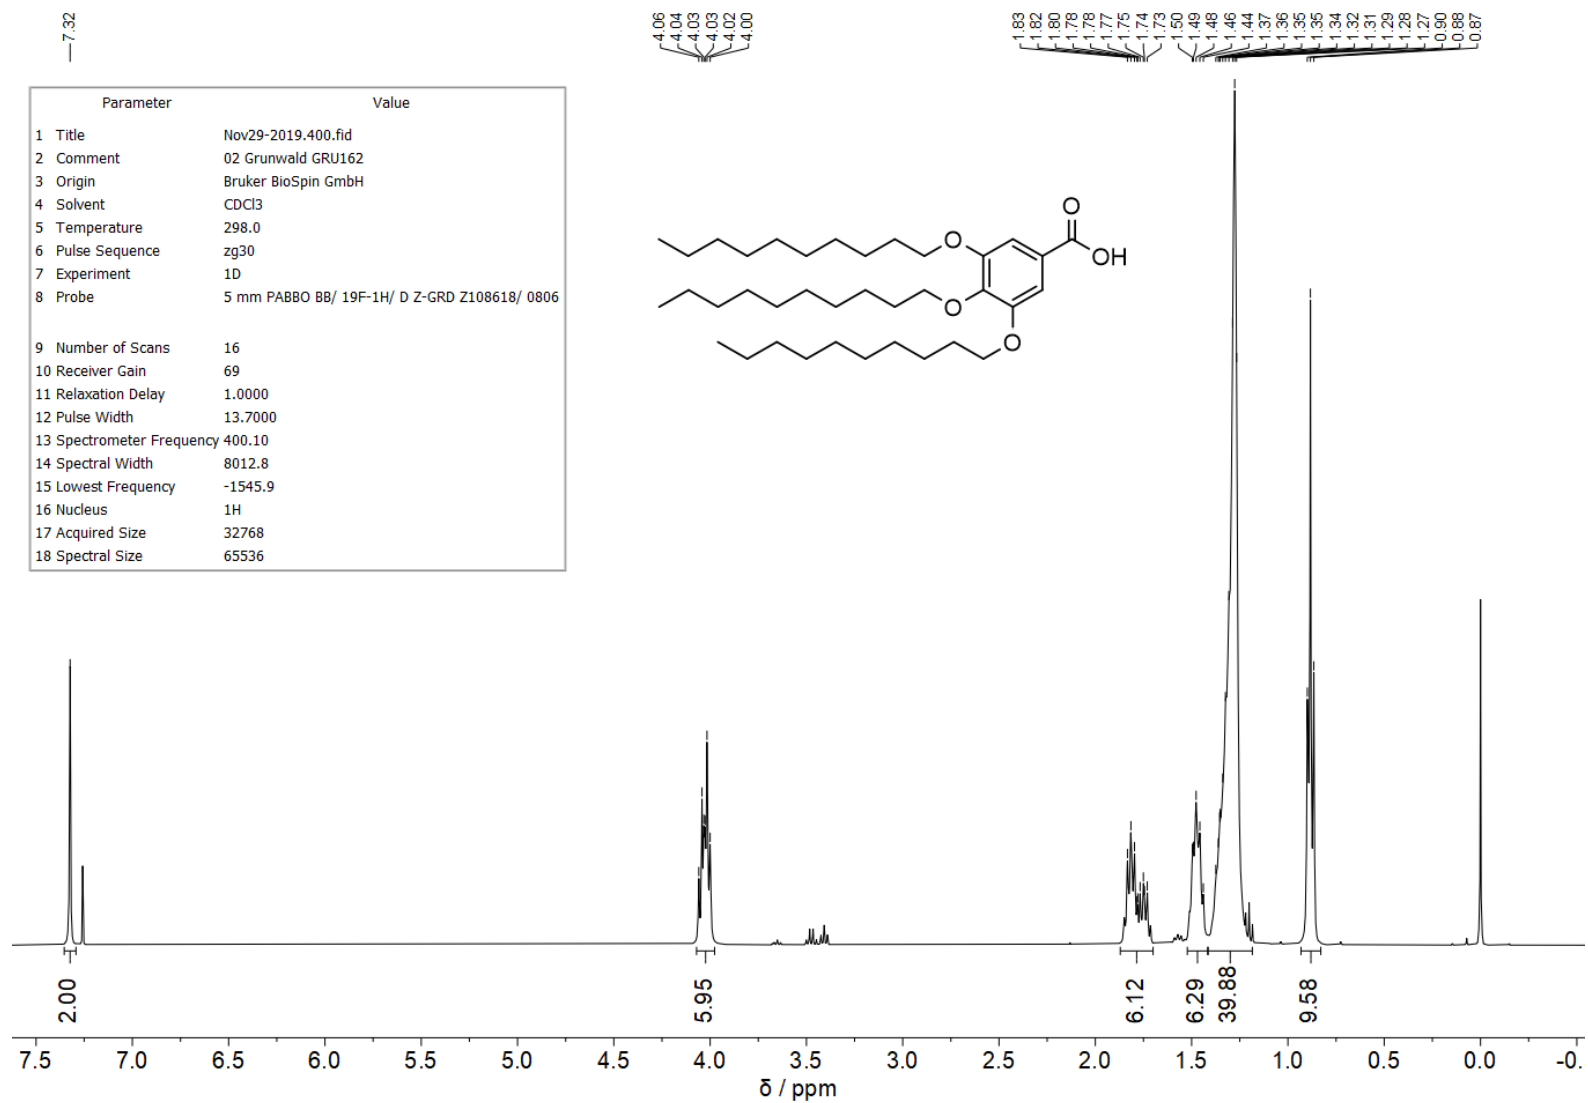



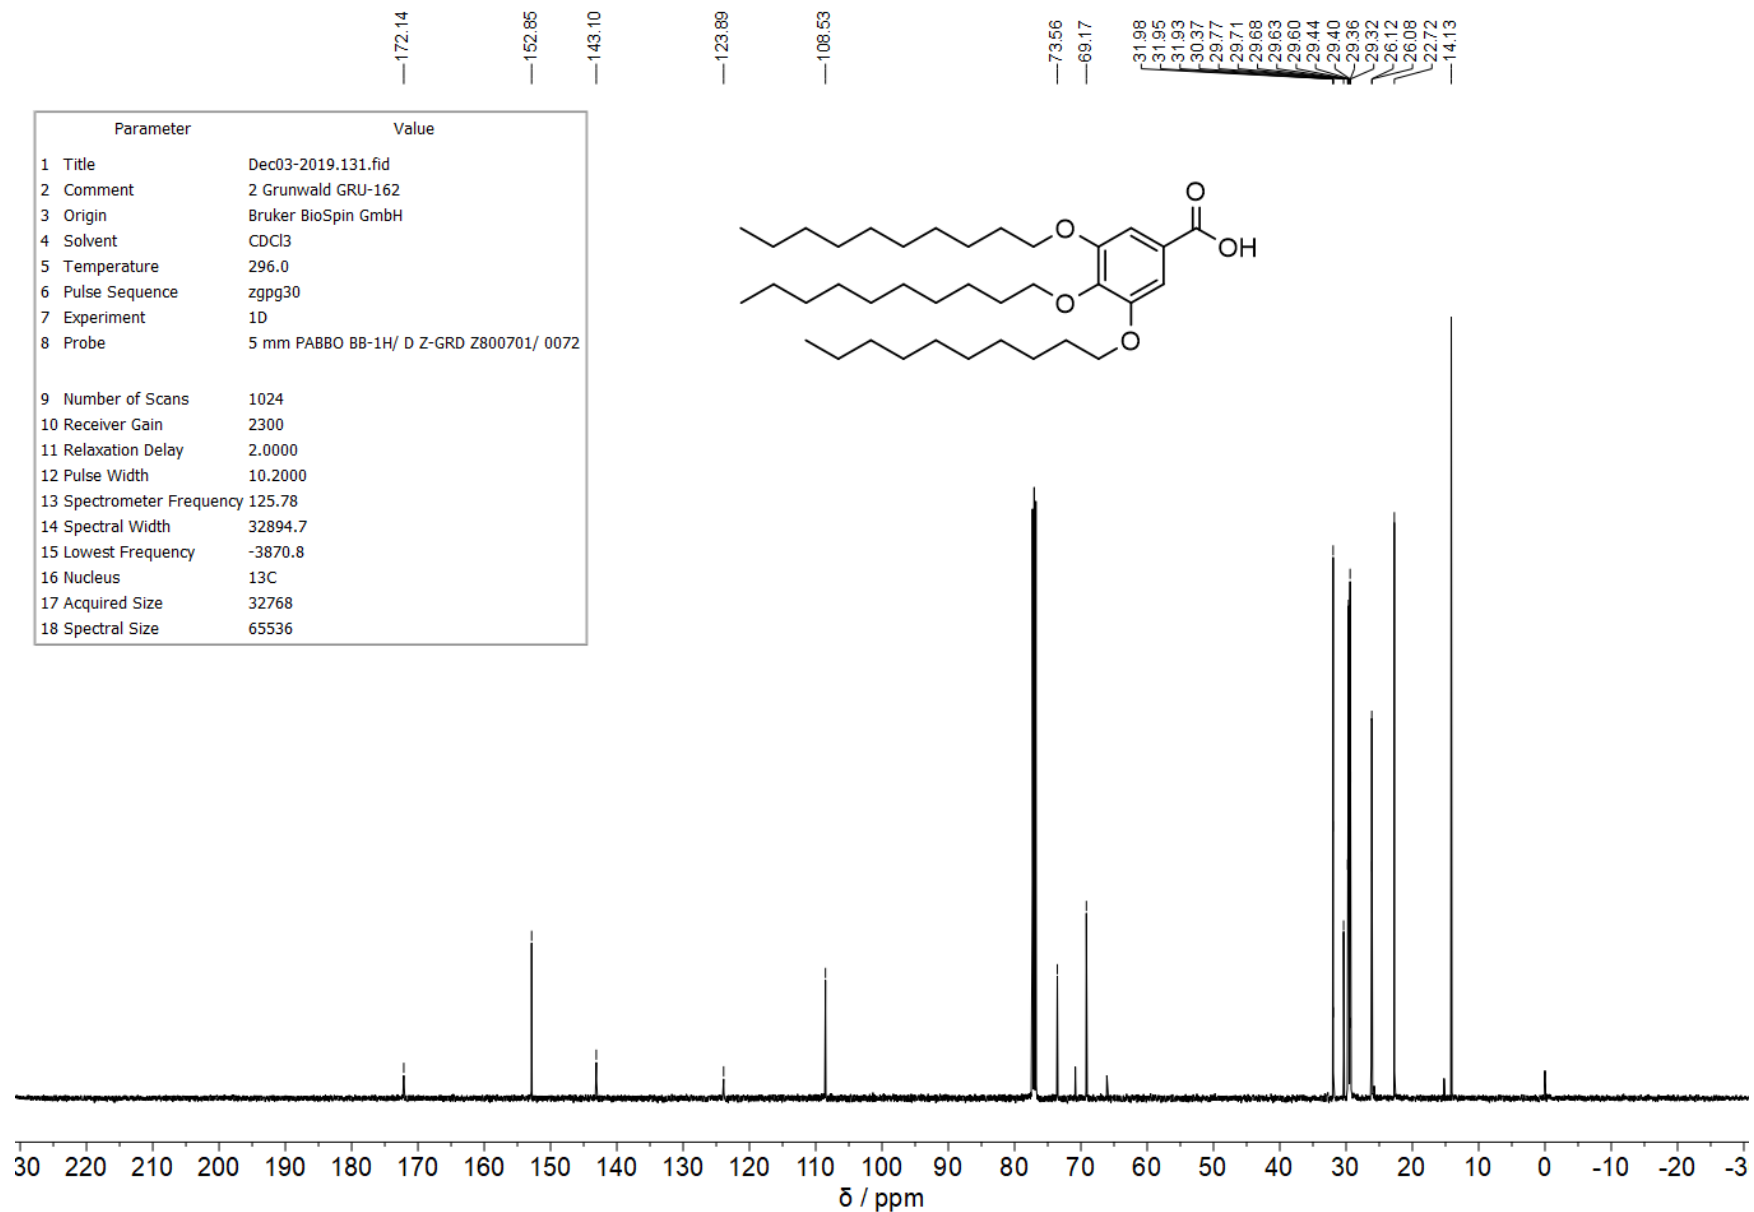

3,4,5-C<sub>12</sub>CO<sub>2</sub>H

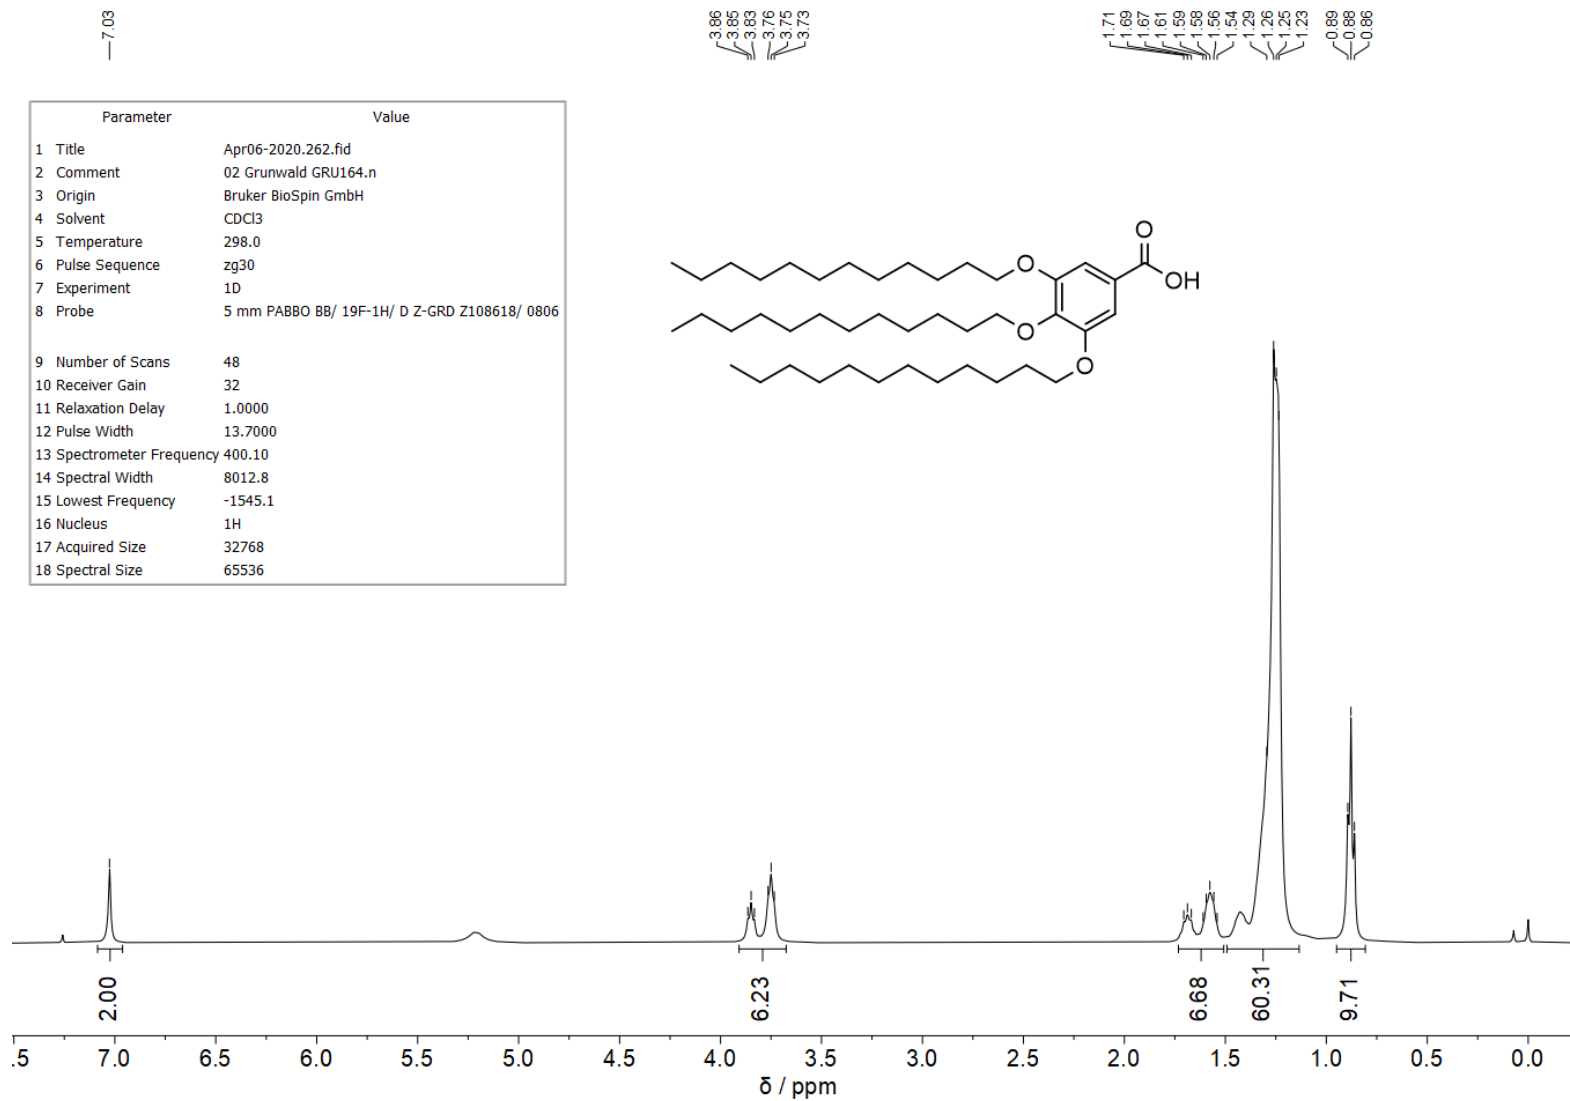

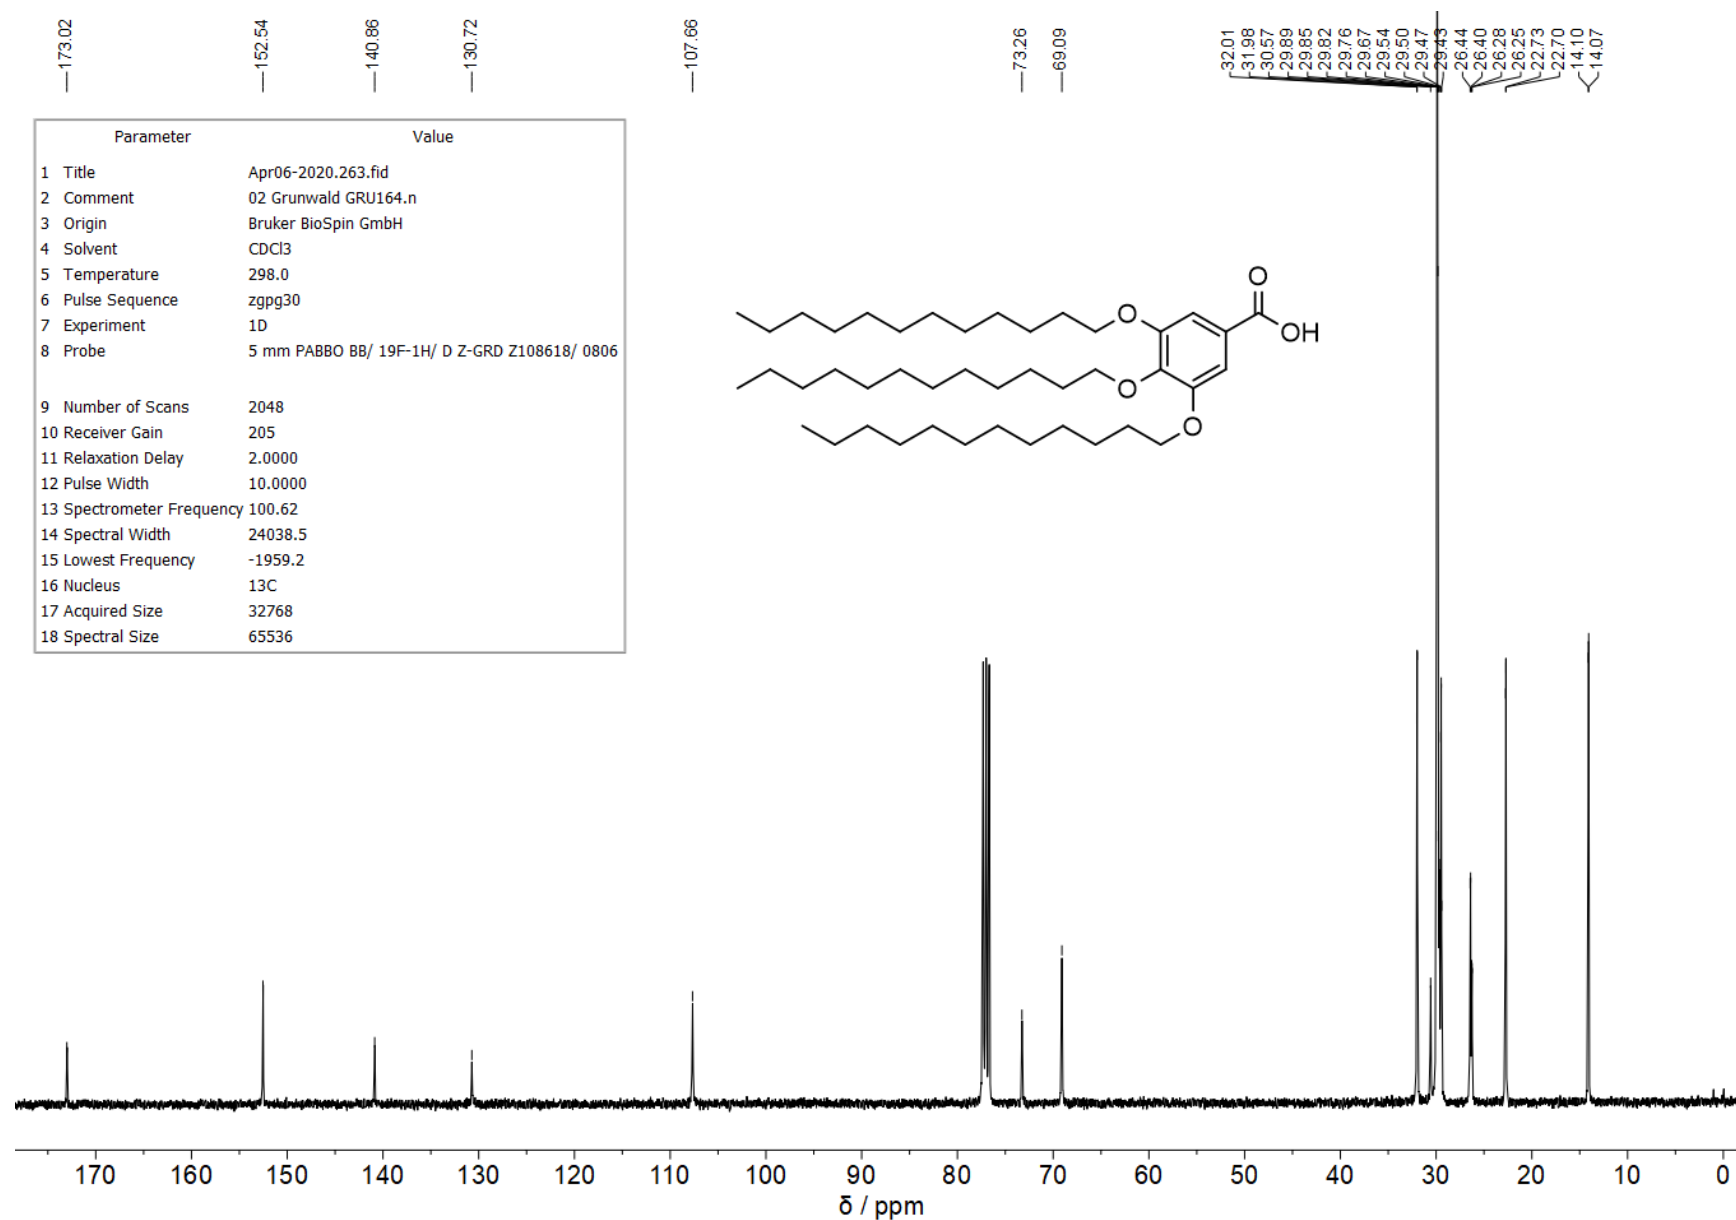

3,4,5-C<sub>14</sub>CO<sub>2</sub>H

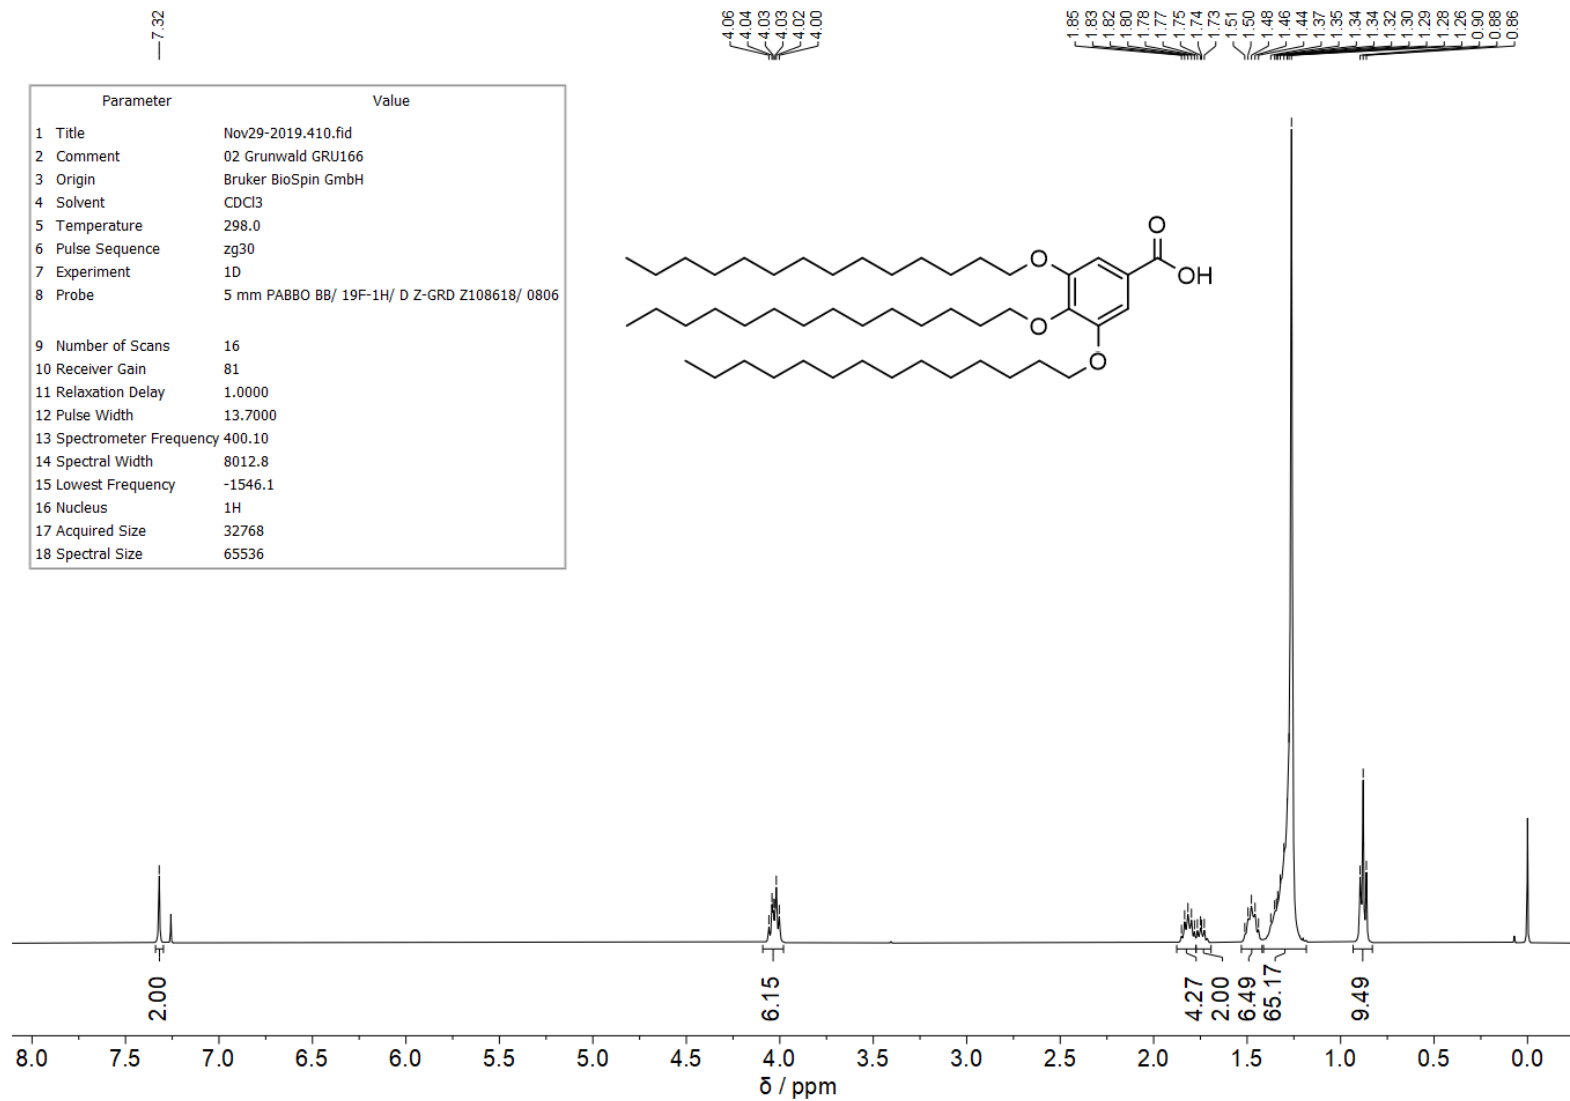

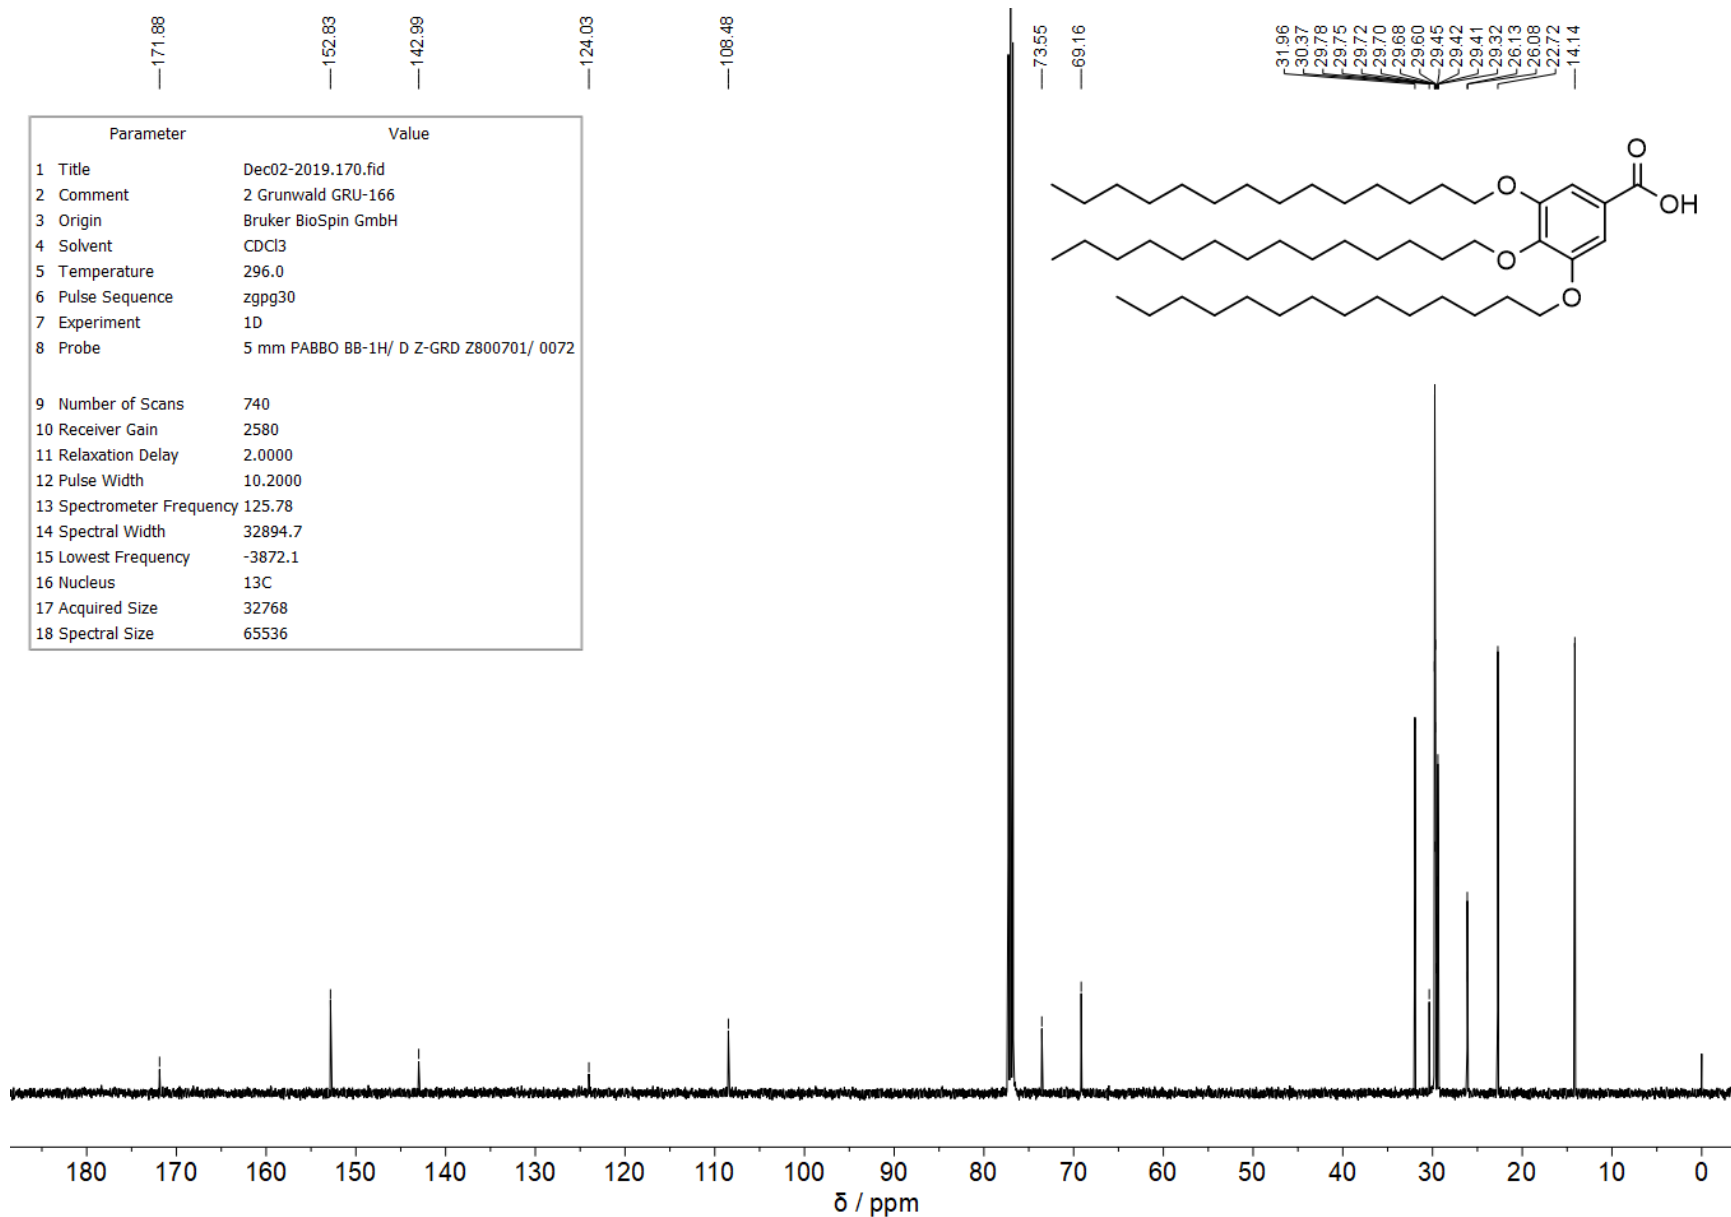

## TyrC10

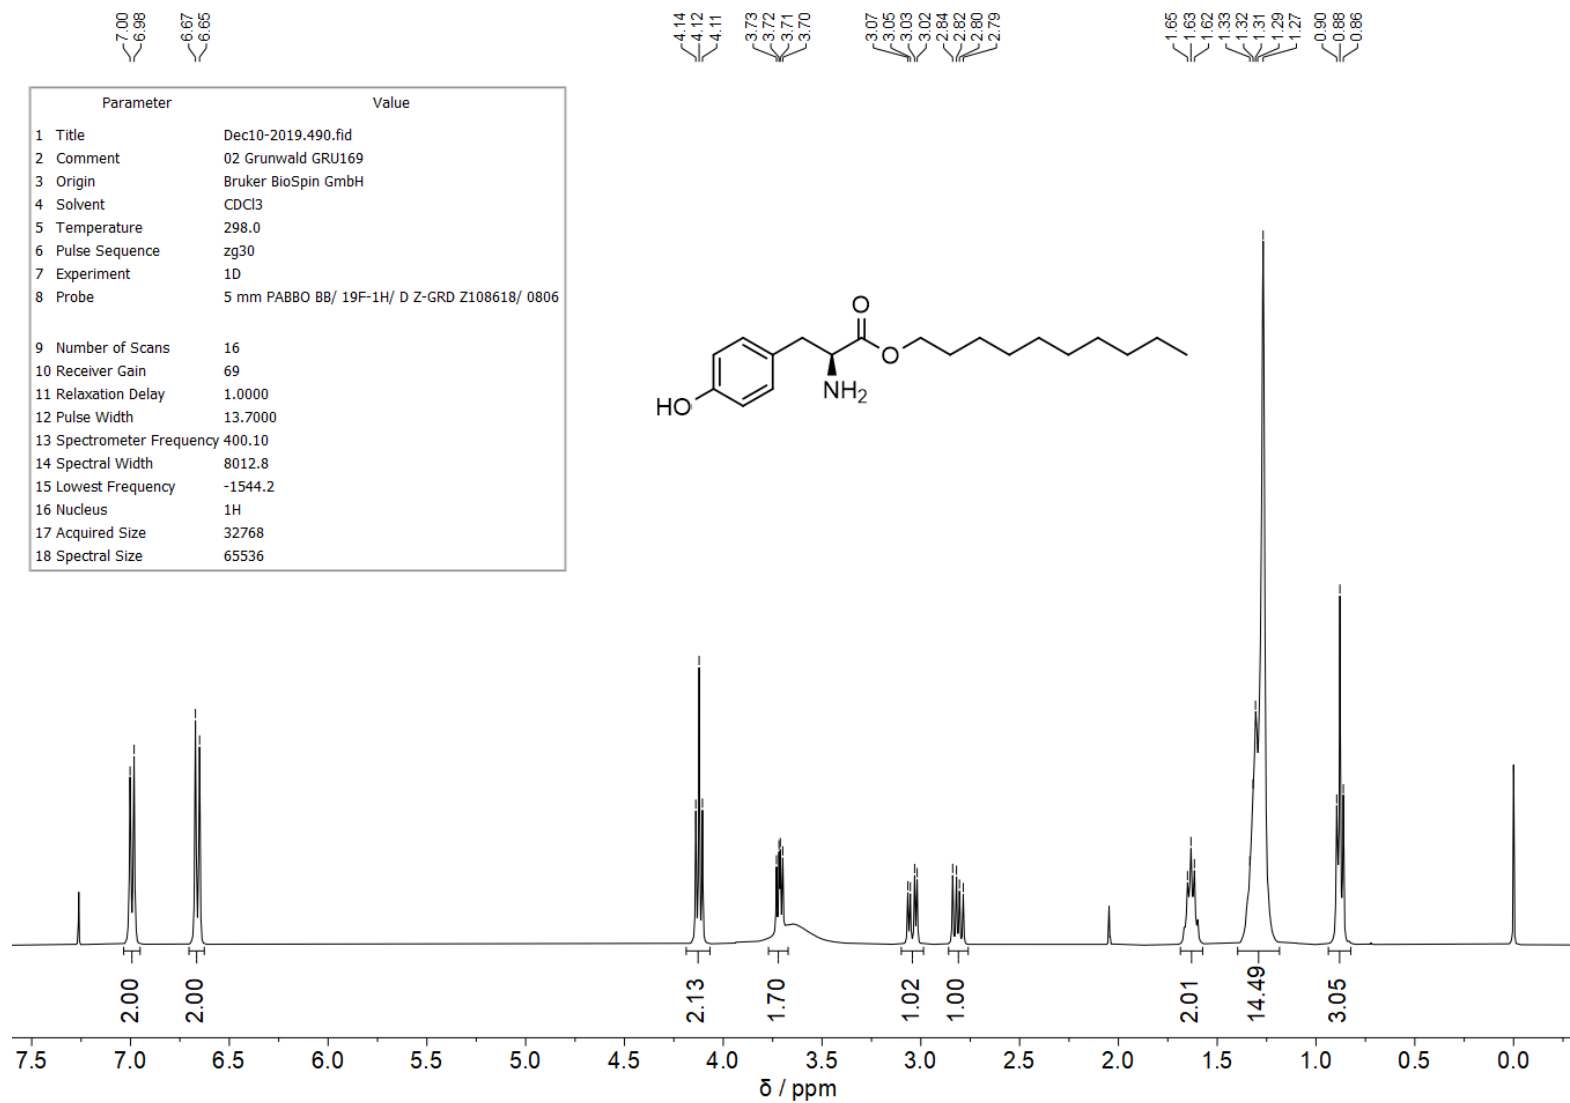

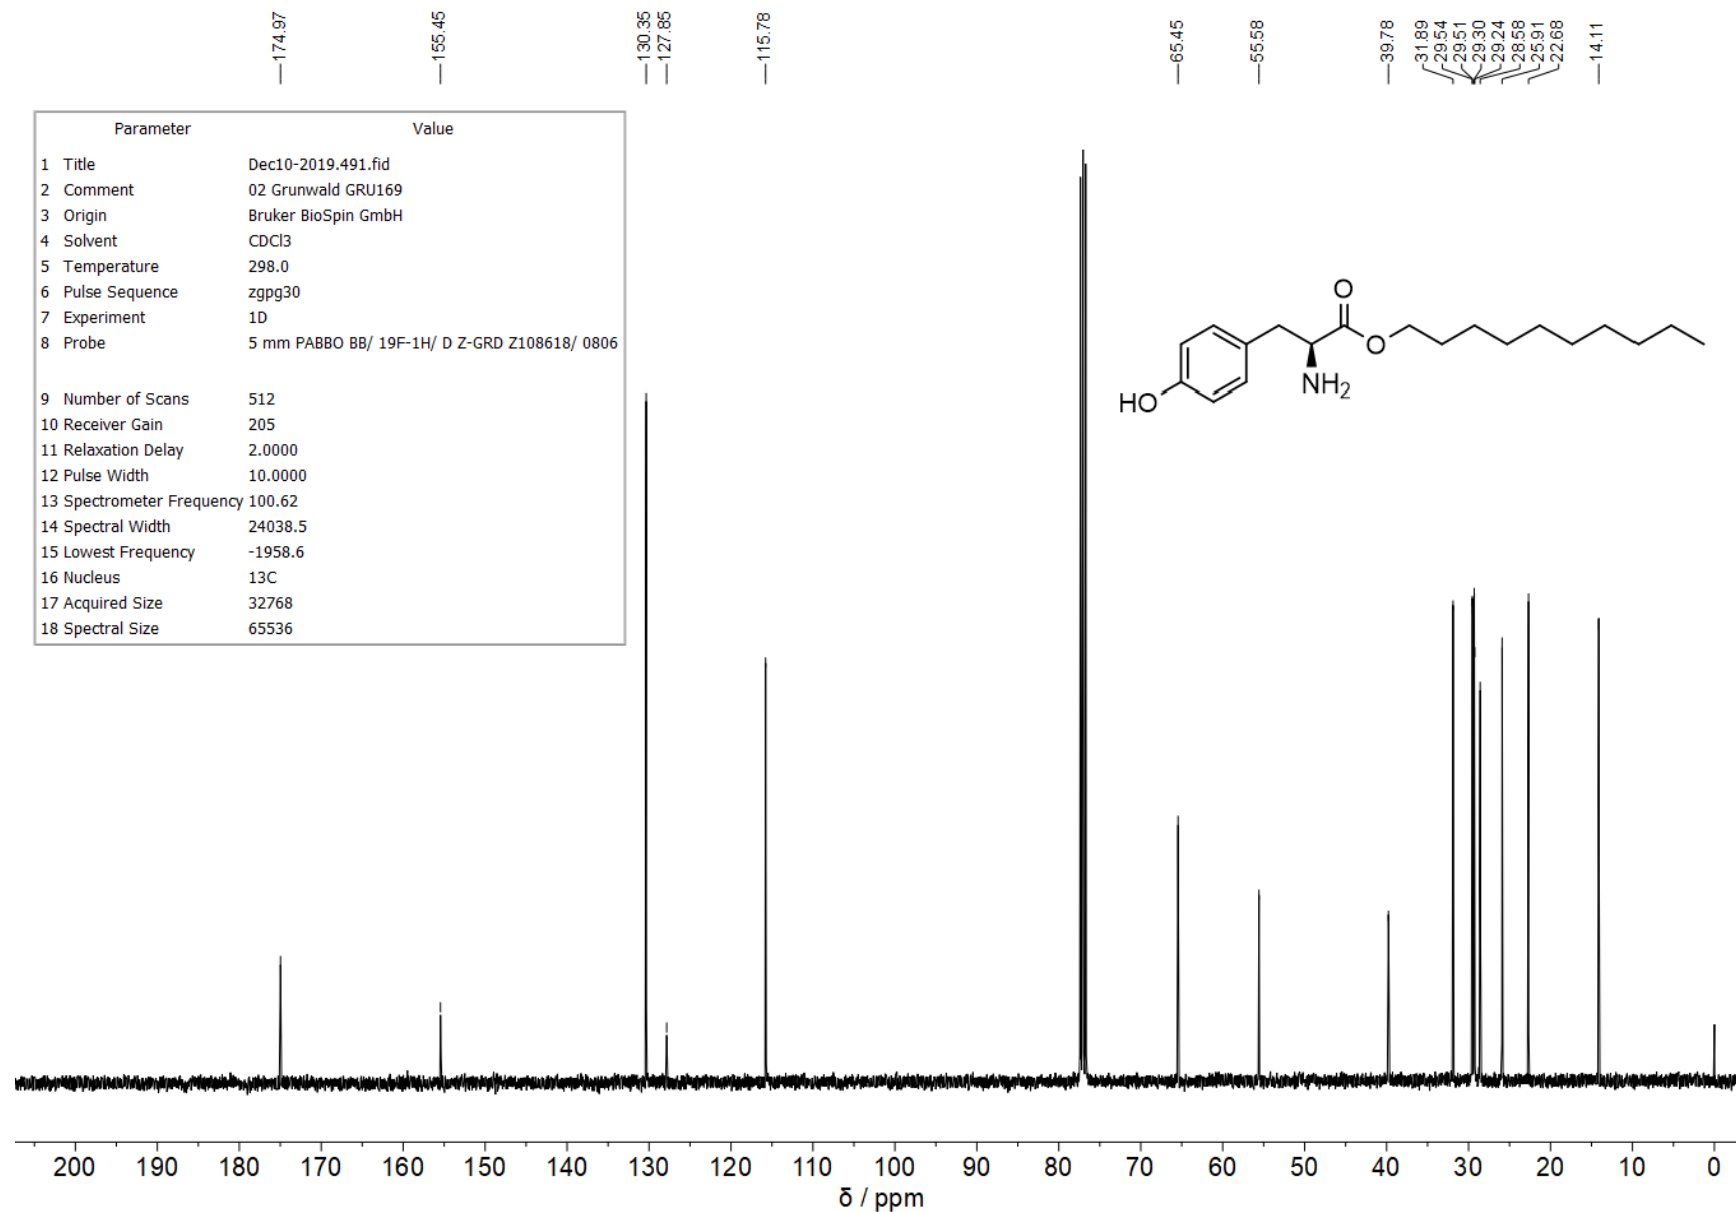

| Parameter                 | Value                                        |
|---------------------------|----------------------------------------------|
| 1 Title                   | Dec10-2019.491.fid                           |
| 2 Comment                 | 02 Grunwald GRU169                           |
| 3 Origin                  | Bruker BioSpin GmbH                          |
| 4 Solvent                 | CDCl3                                        |
| 5 Temperature             | 298.0                                        |
| 6 Pulse Sequence          | zgpg30                                       |
| 7 Experiment              | 1D                                           |
| 8 Probe                   | 5 mm PABBO BB/ 19F-1H/ D Z-GRD Z108618/ 0806 |
| 9 Number of Scans         | 512                                          |
| 10 Receiver Gain          | 205                                          |
| 11 Relaxation Delay       | 2.0000                                       |
| 12 Pulse Width            | 10.0000                                      |
| 13 Spectrometer Frequency | 100.62                                       |
| 14 Spectral Width         | 24038.5                                      |
| 15 Lowest Frequency       | -1958.6                                      |
| 16 Nucleus                | 13C                                          |
| 17 Acquired Size          | 32768                                        |
| 18 Spectral Size          | 65536                                        |

## TyrC12

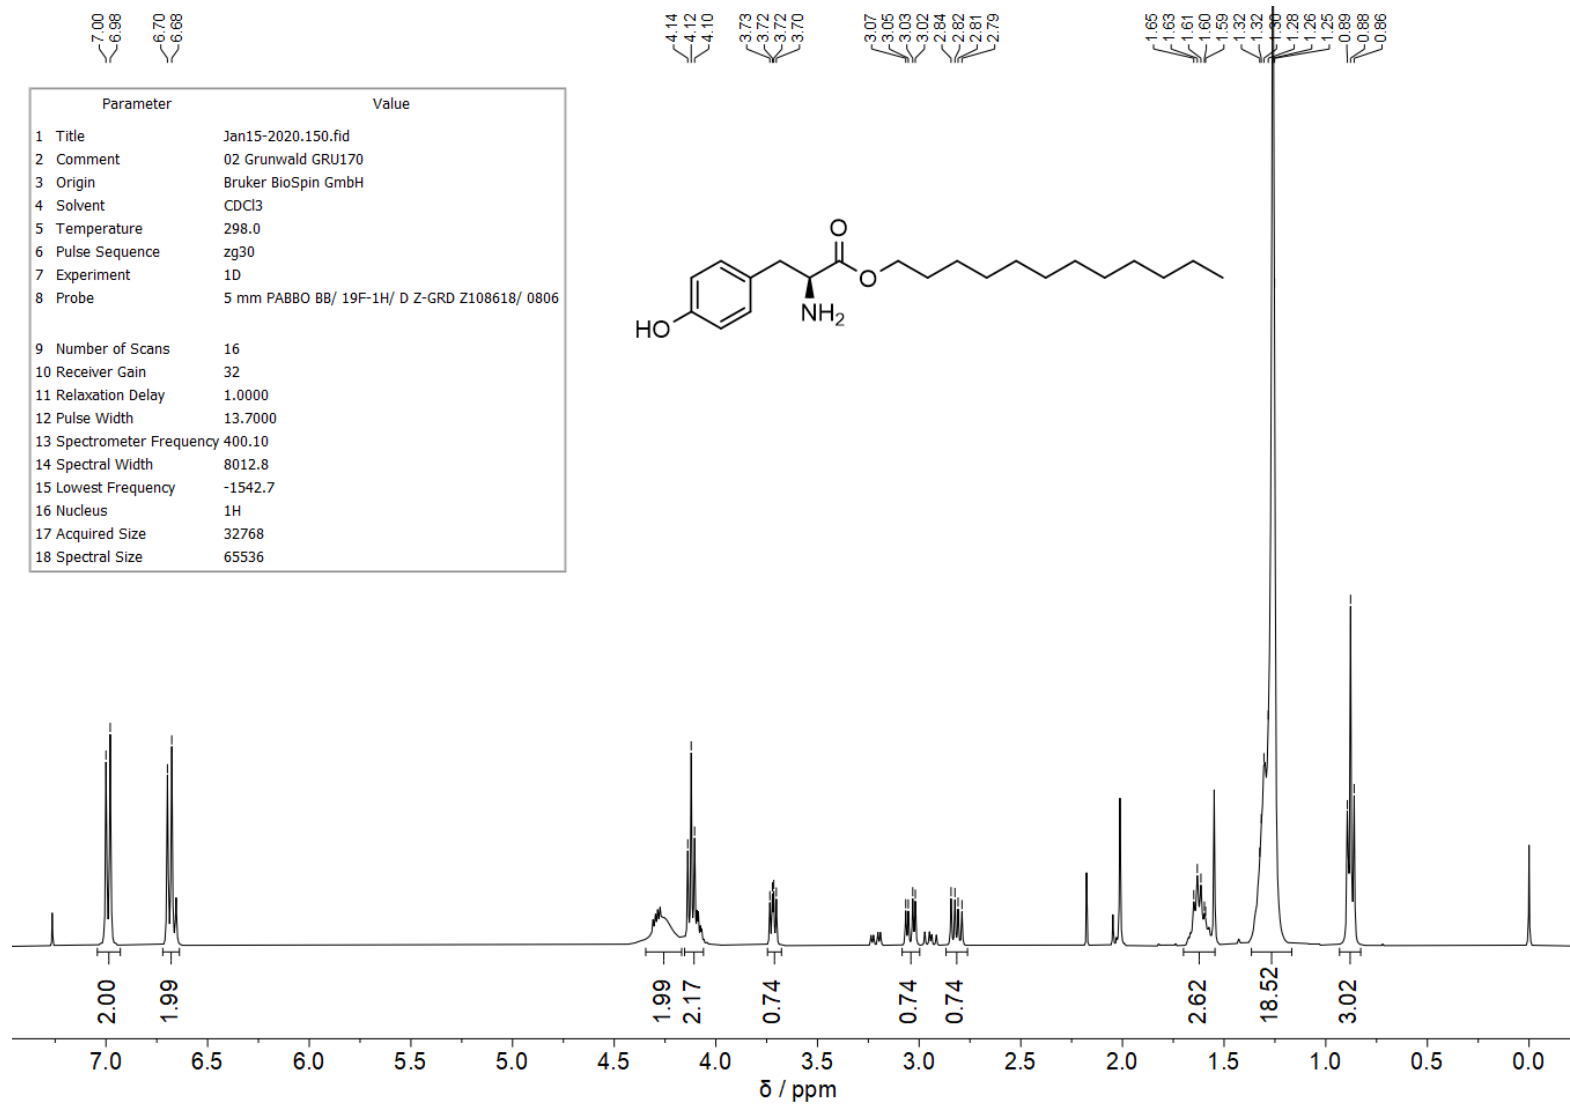



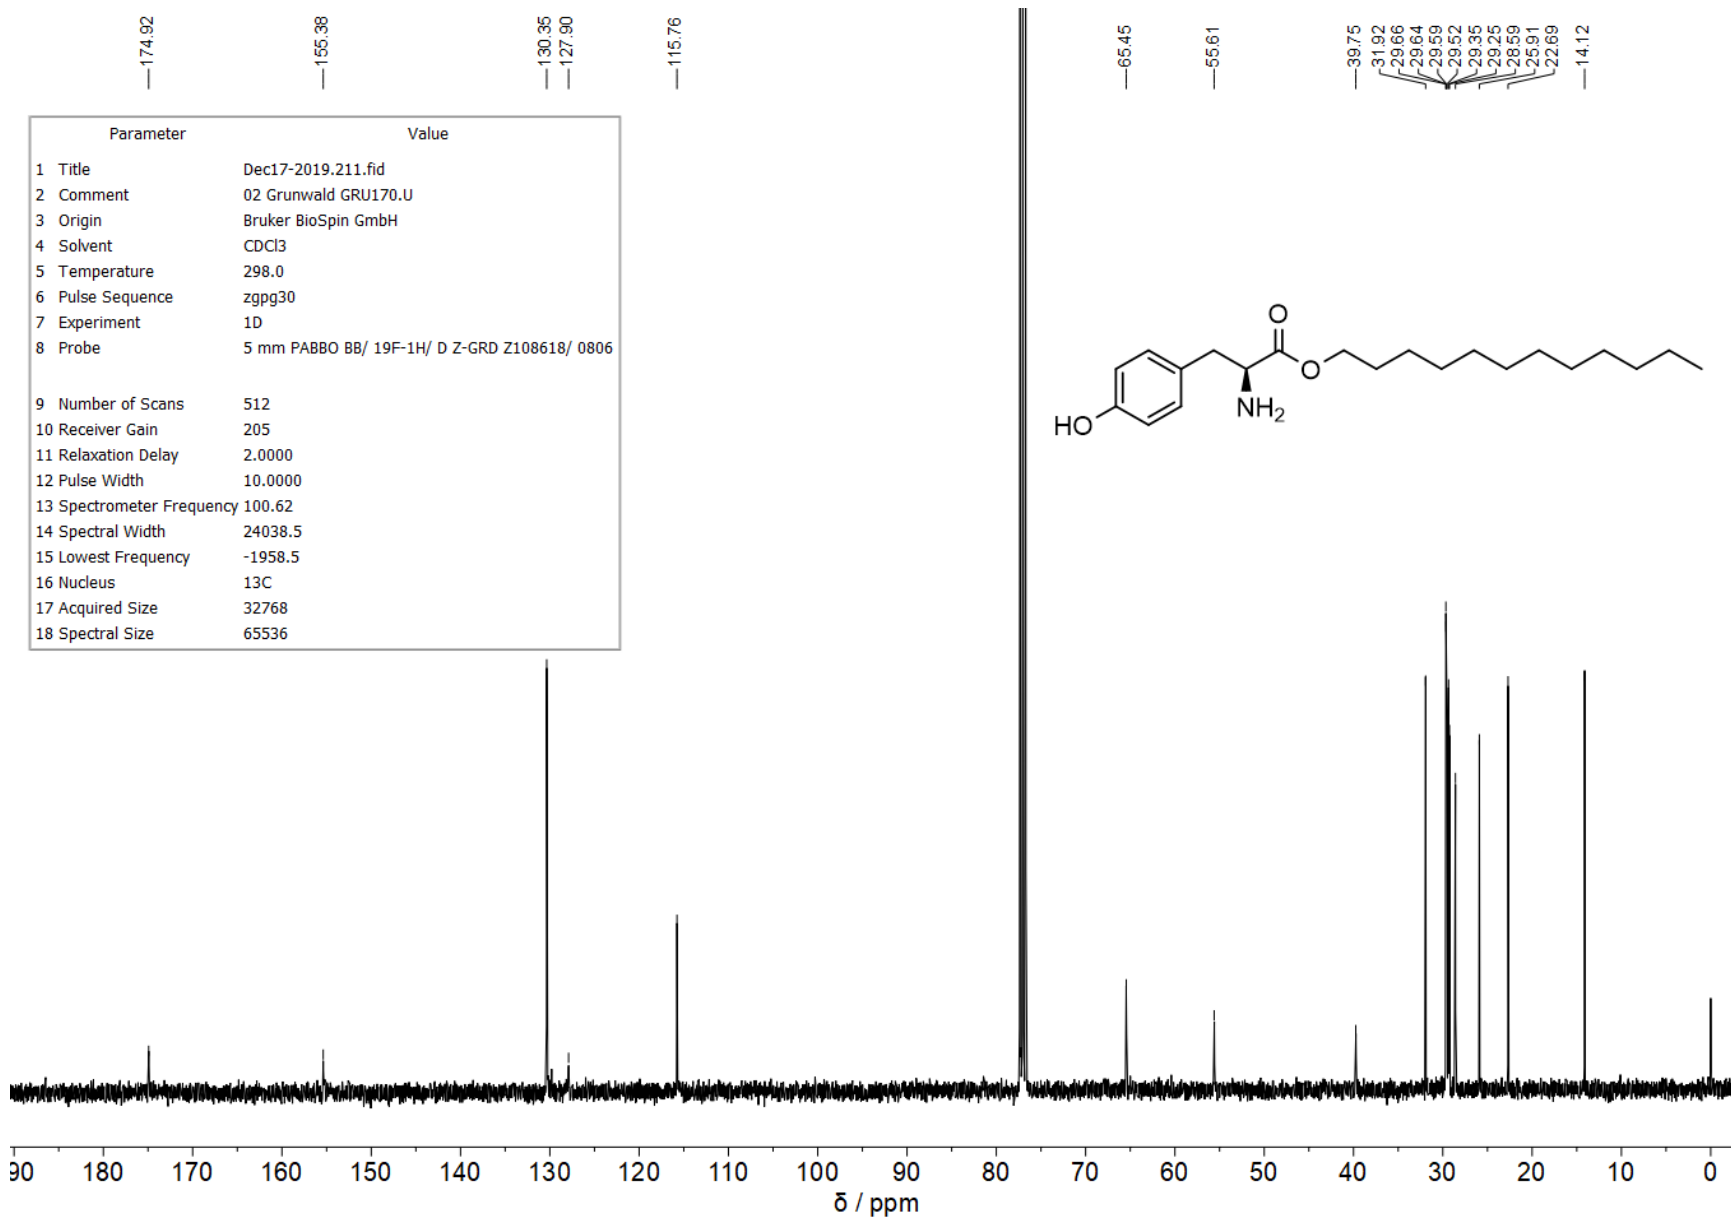

TyrC14

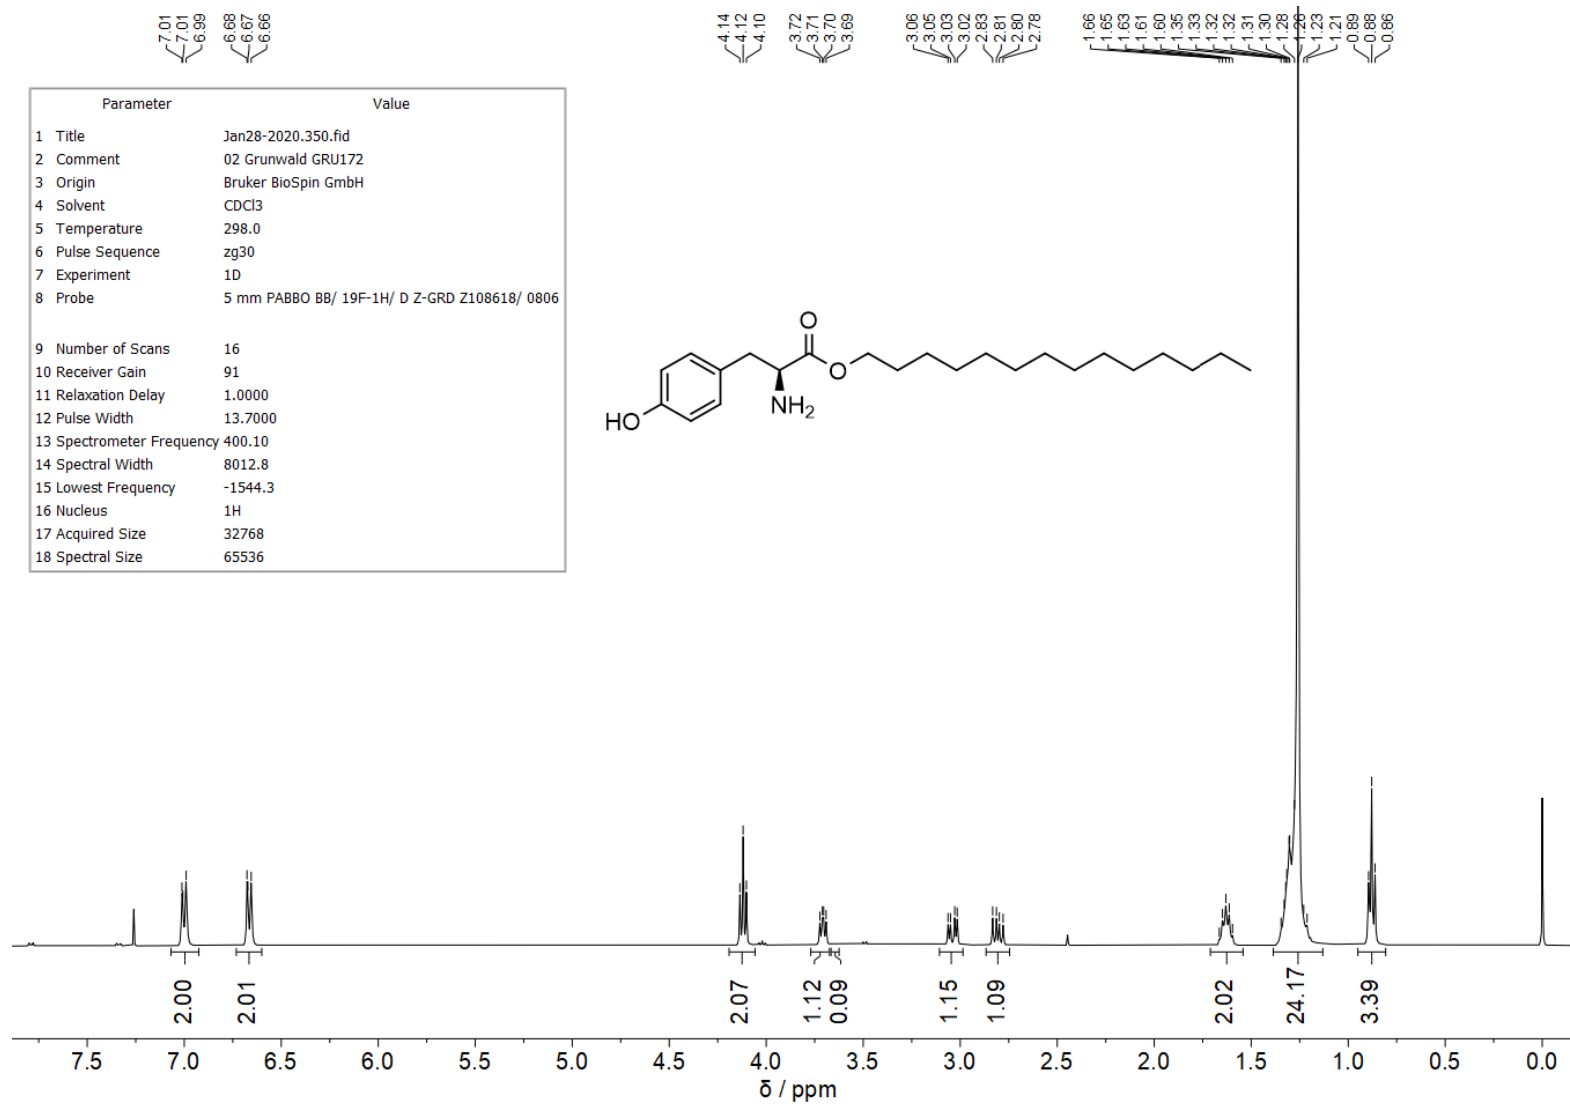

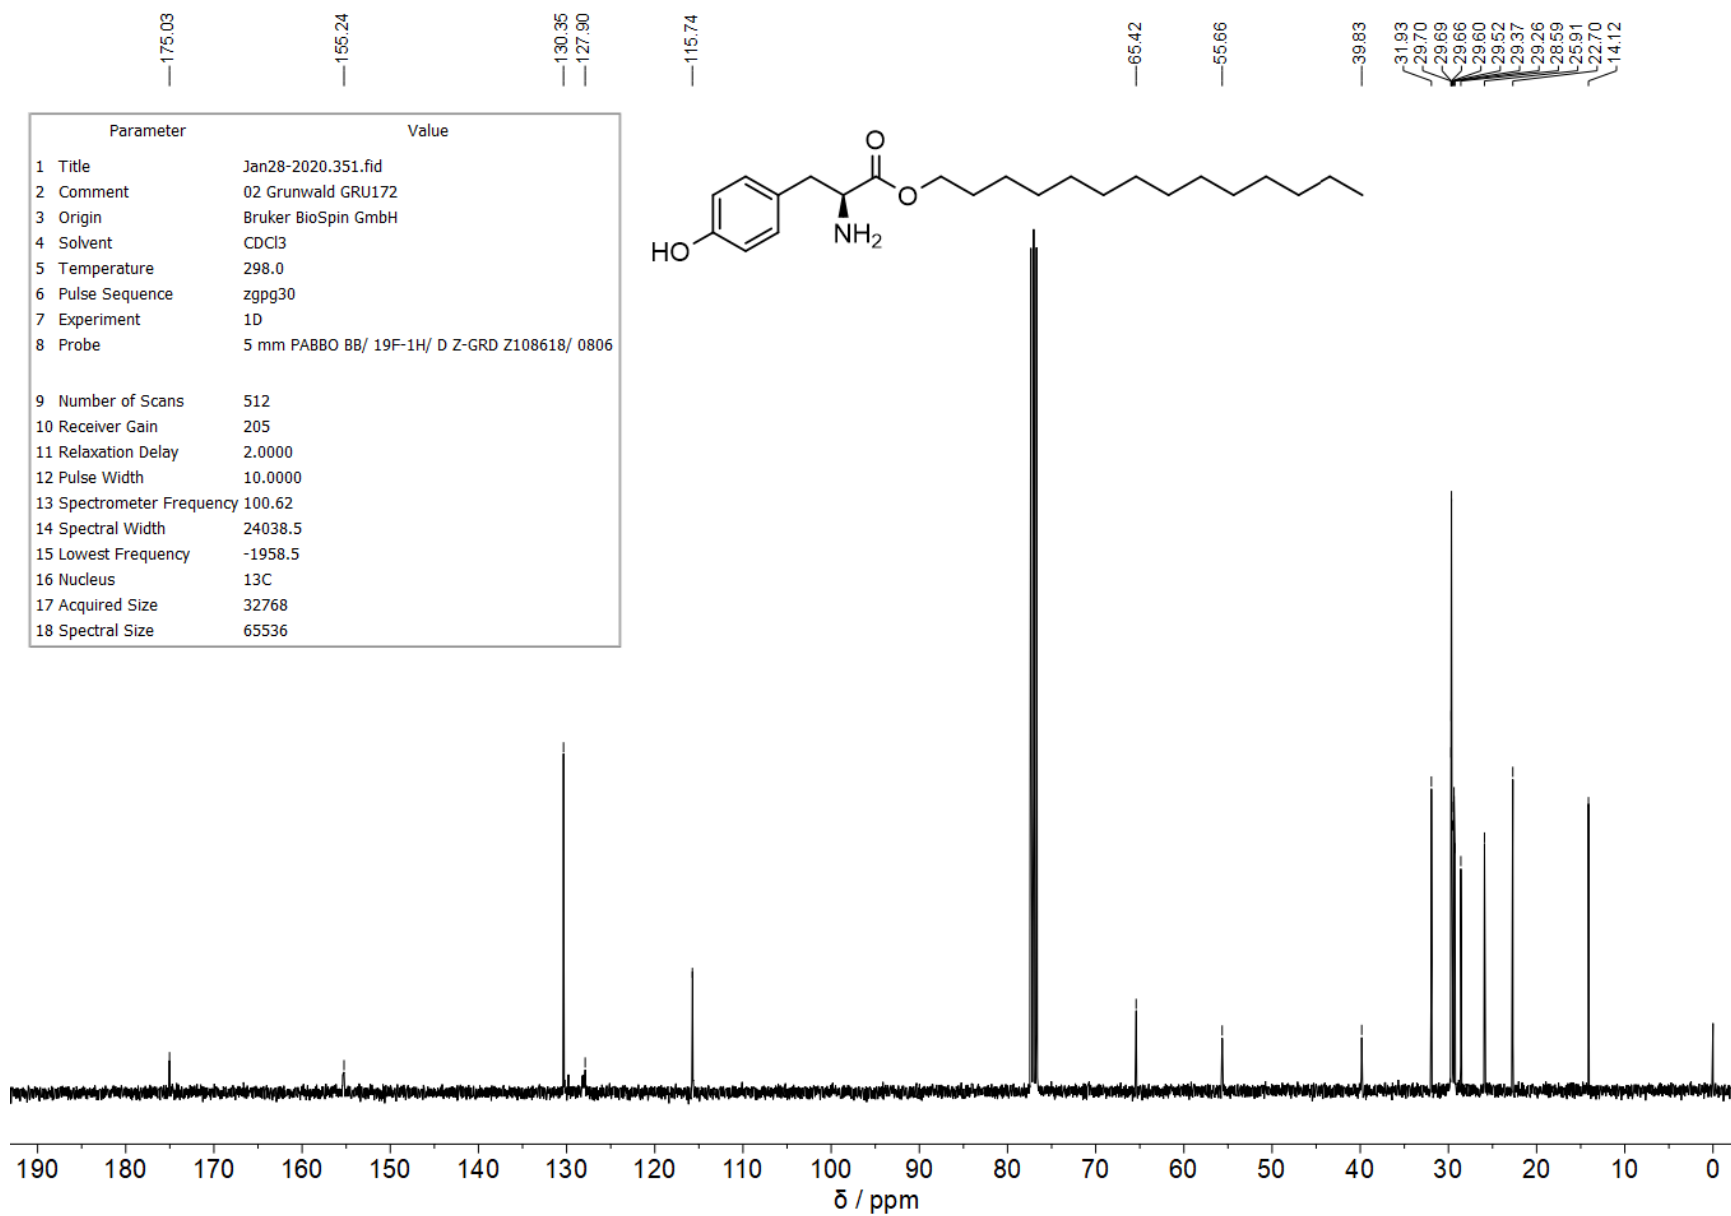

TyrC<sub>10</sub>Boc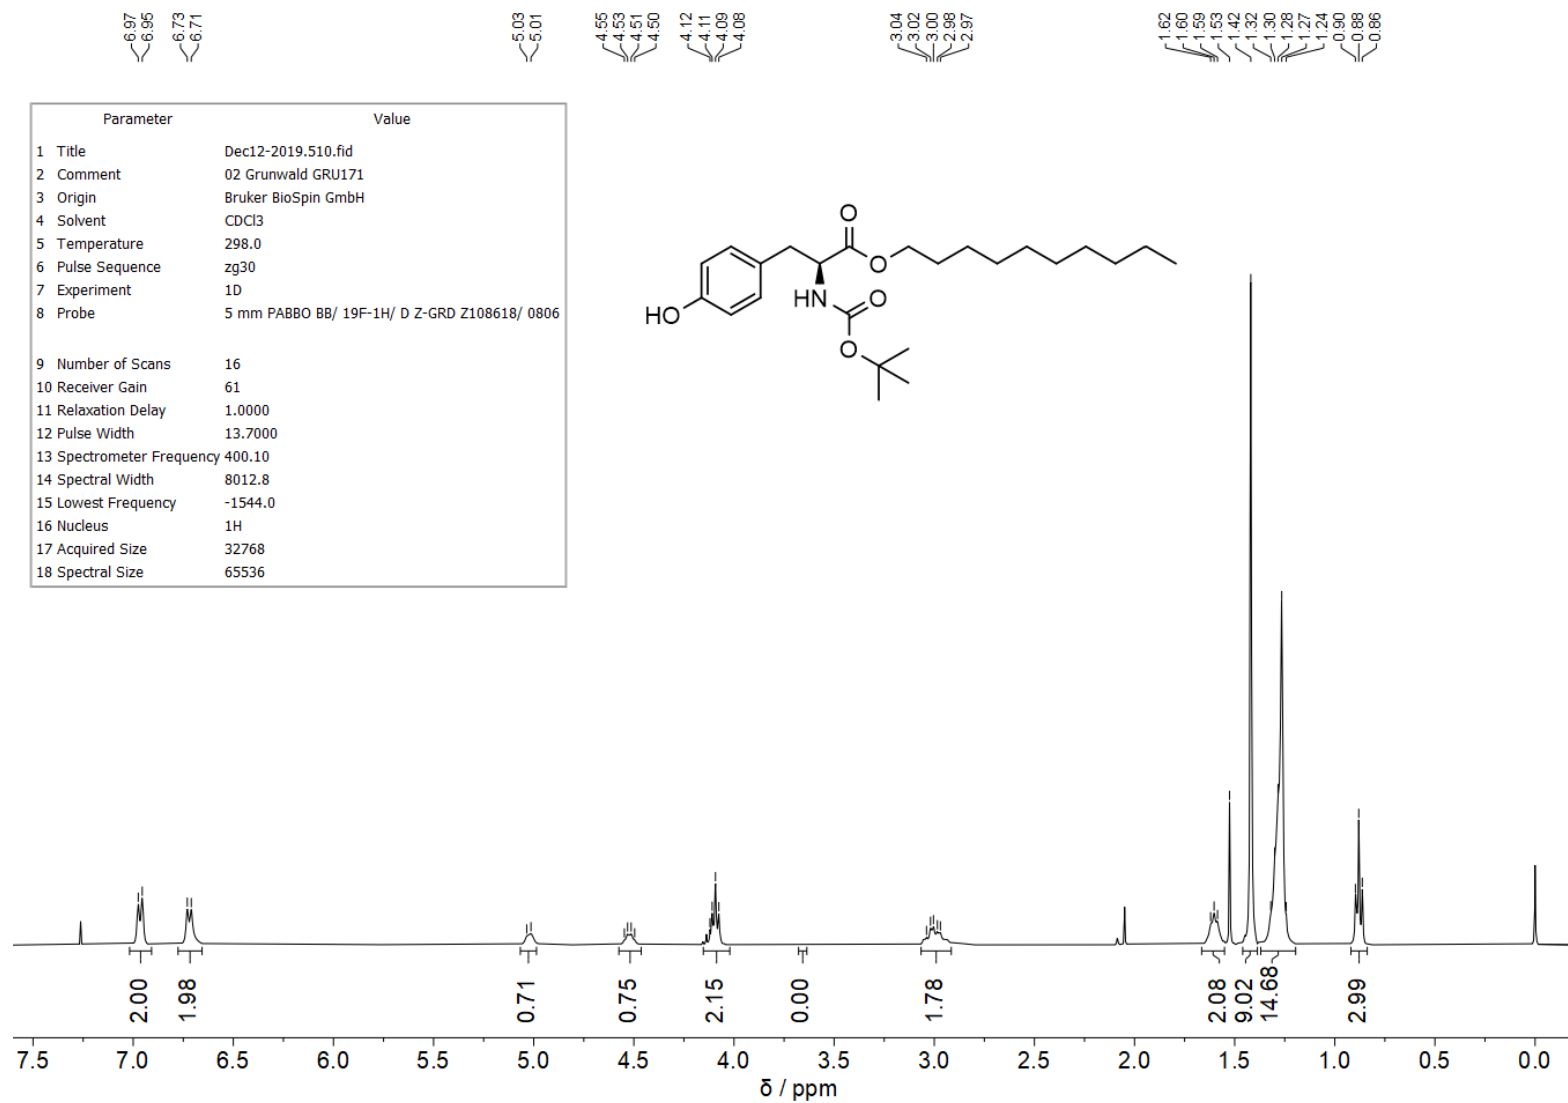

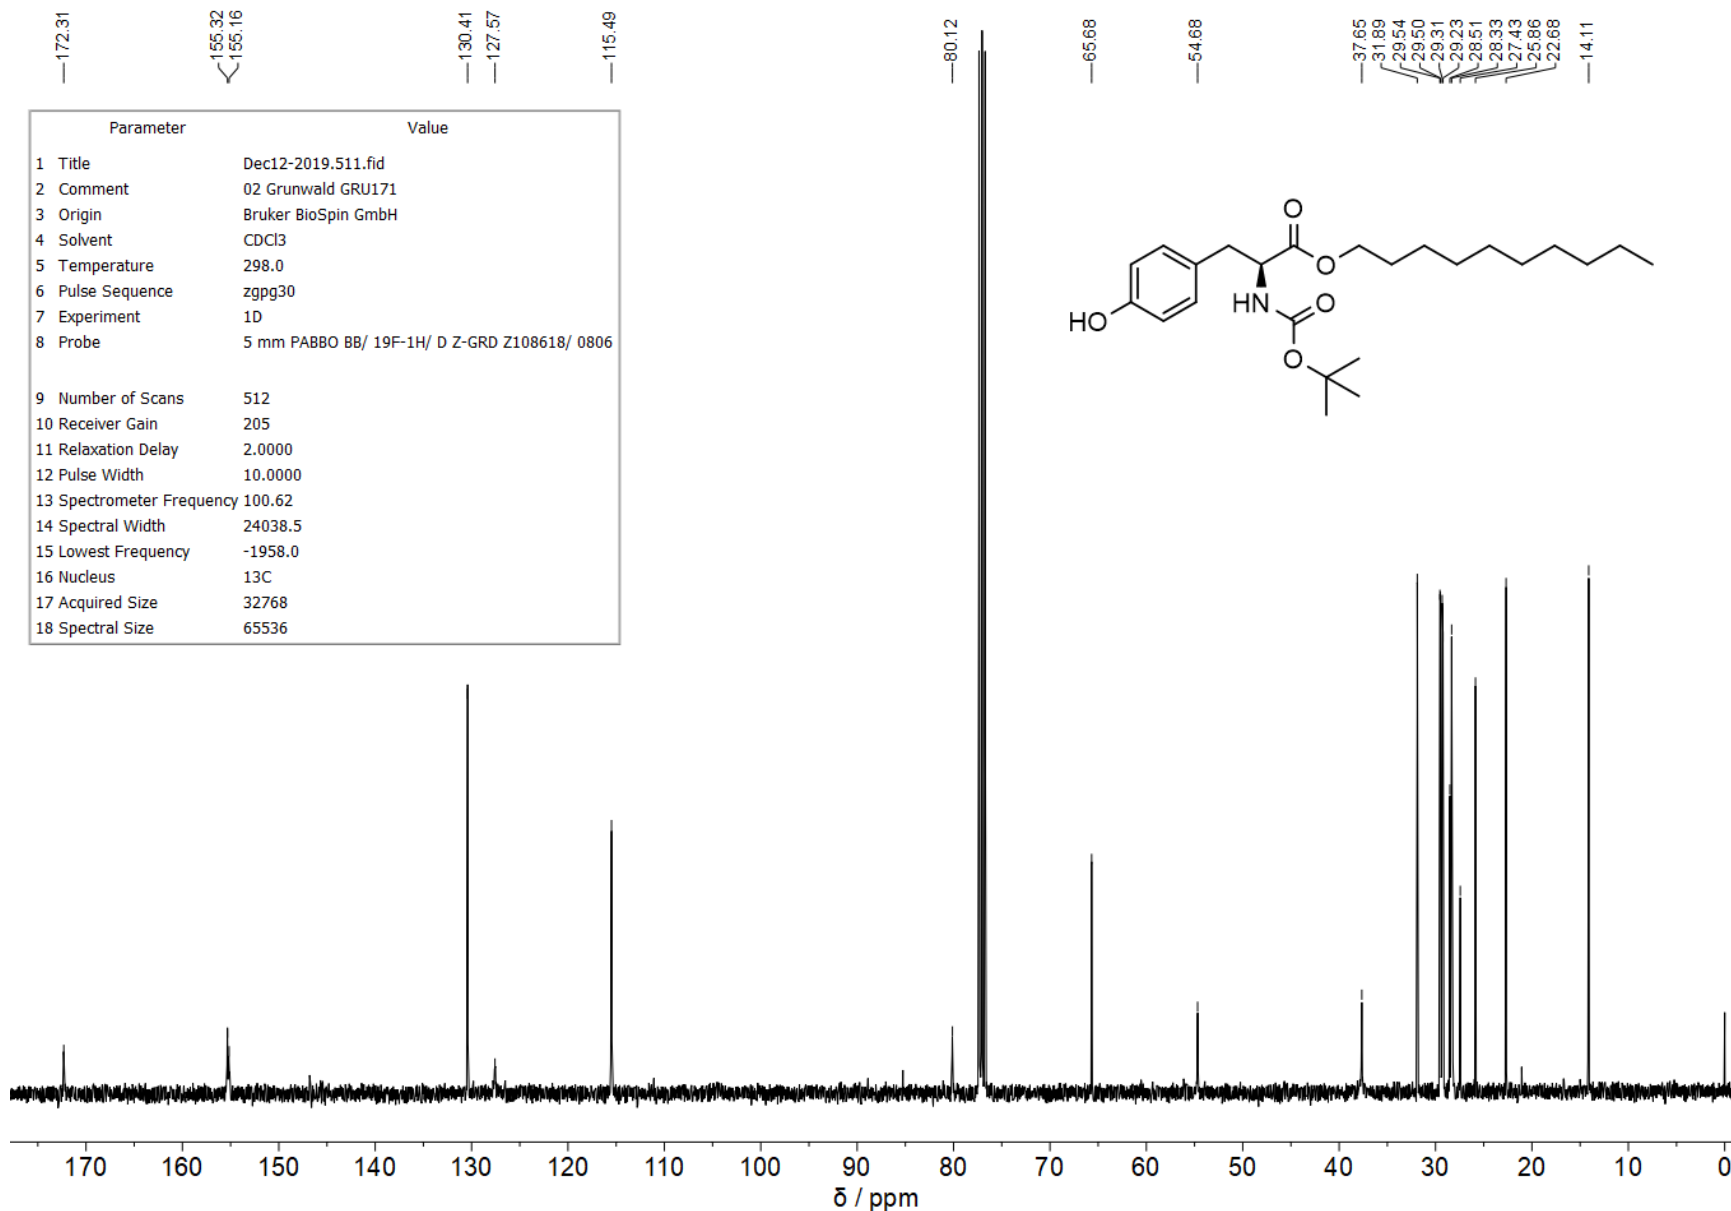

TyrC<sub>12</sub>Boc

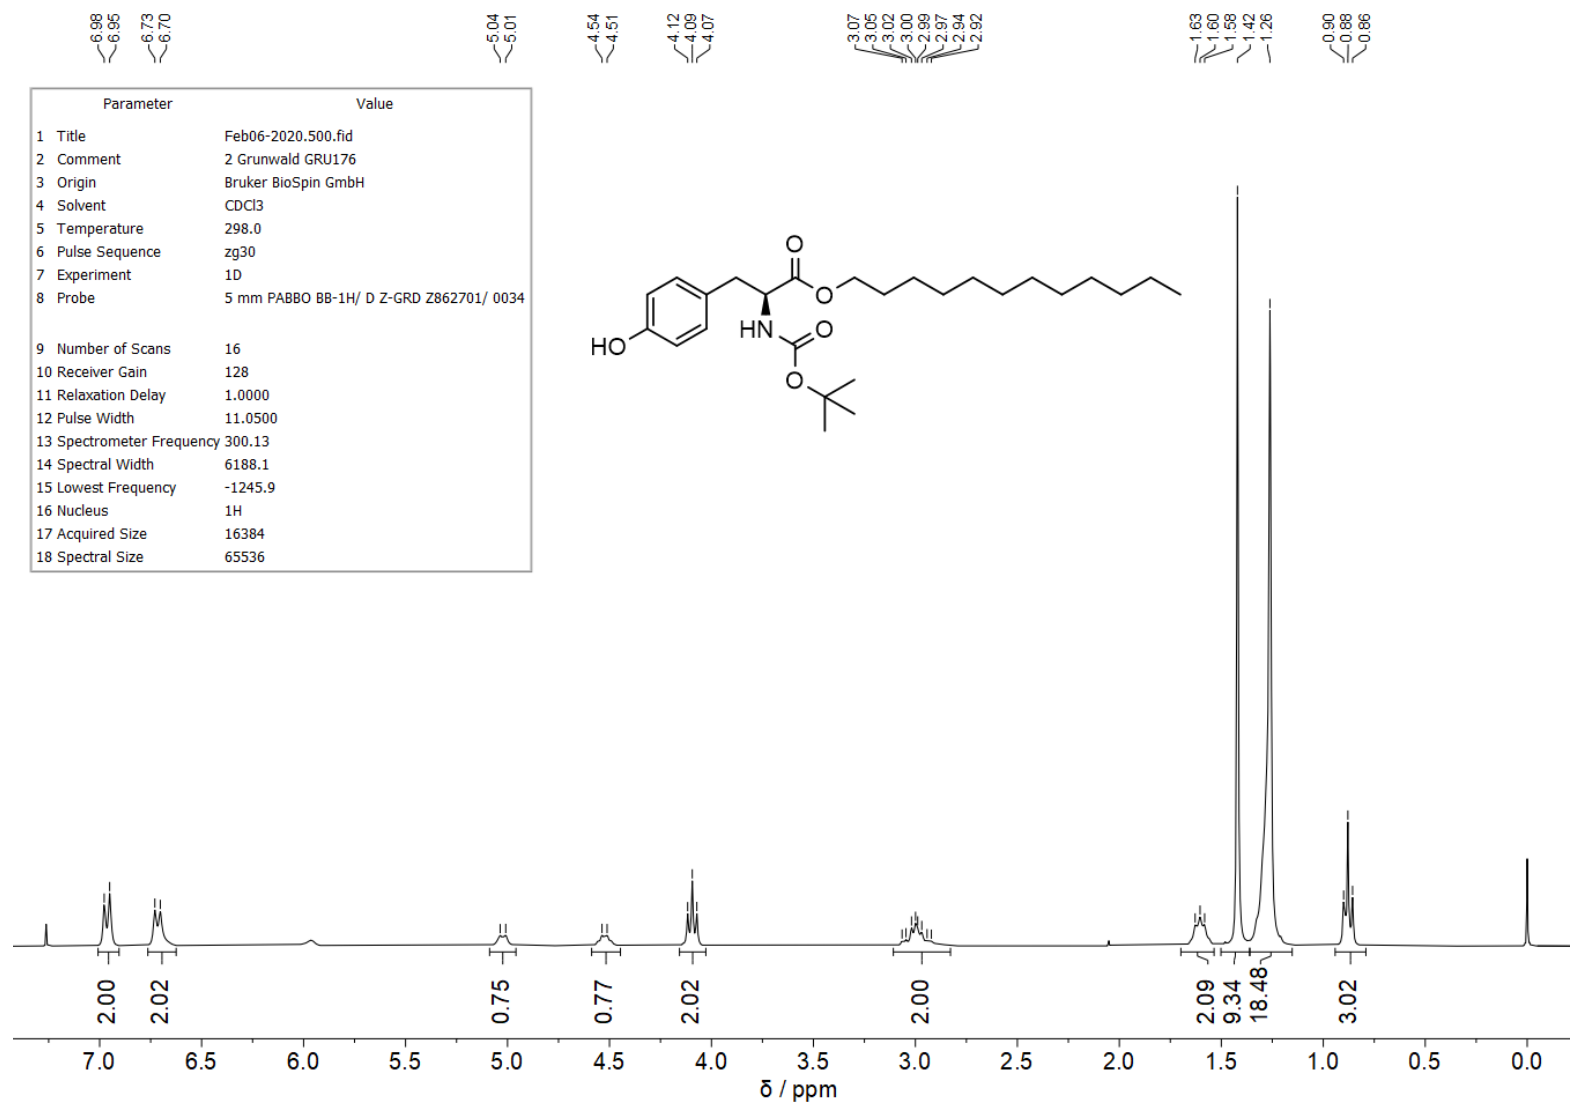

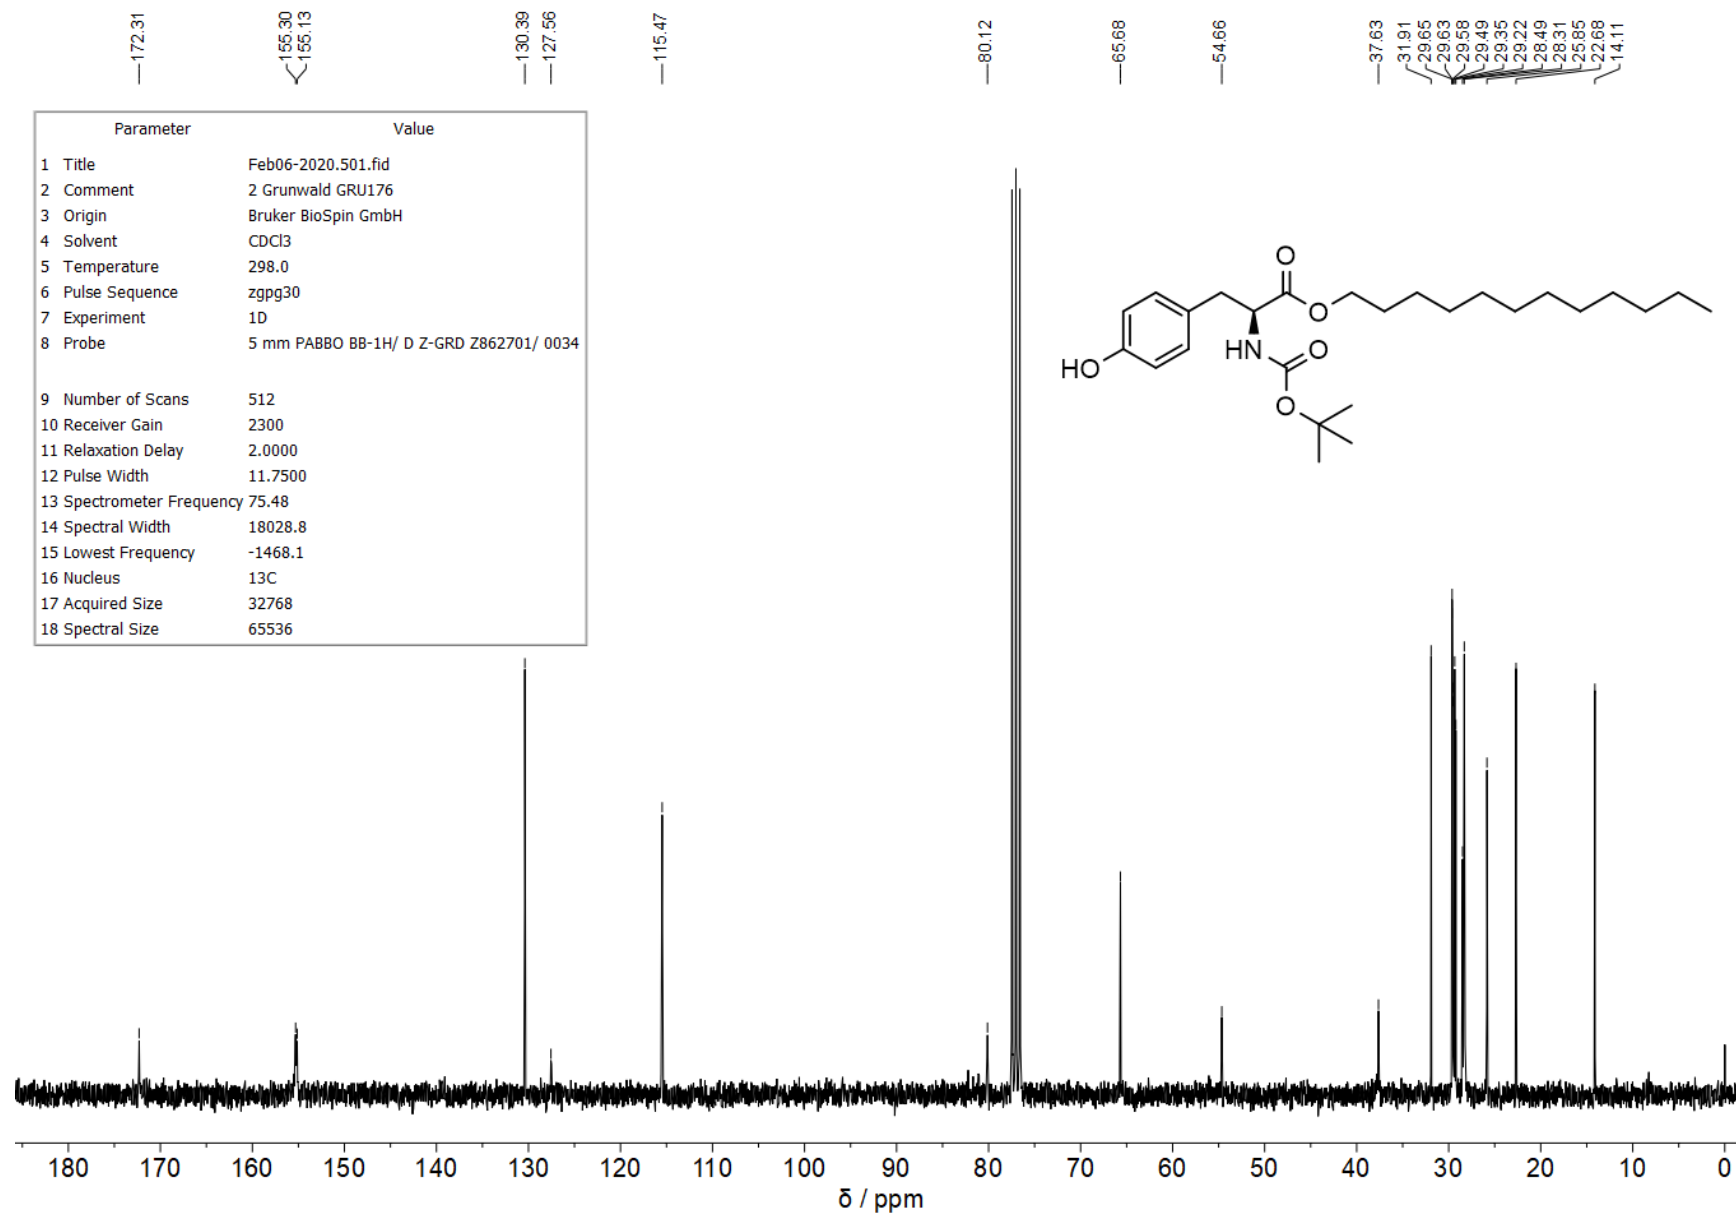

TyrC14Boc

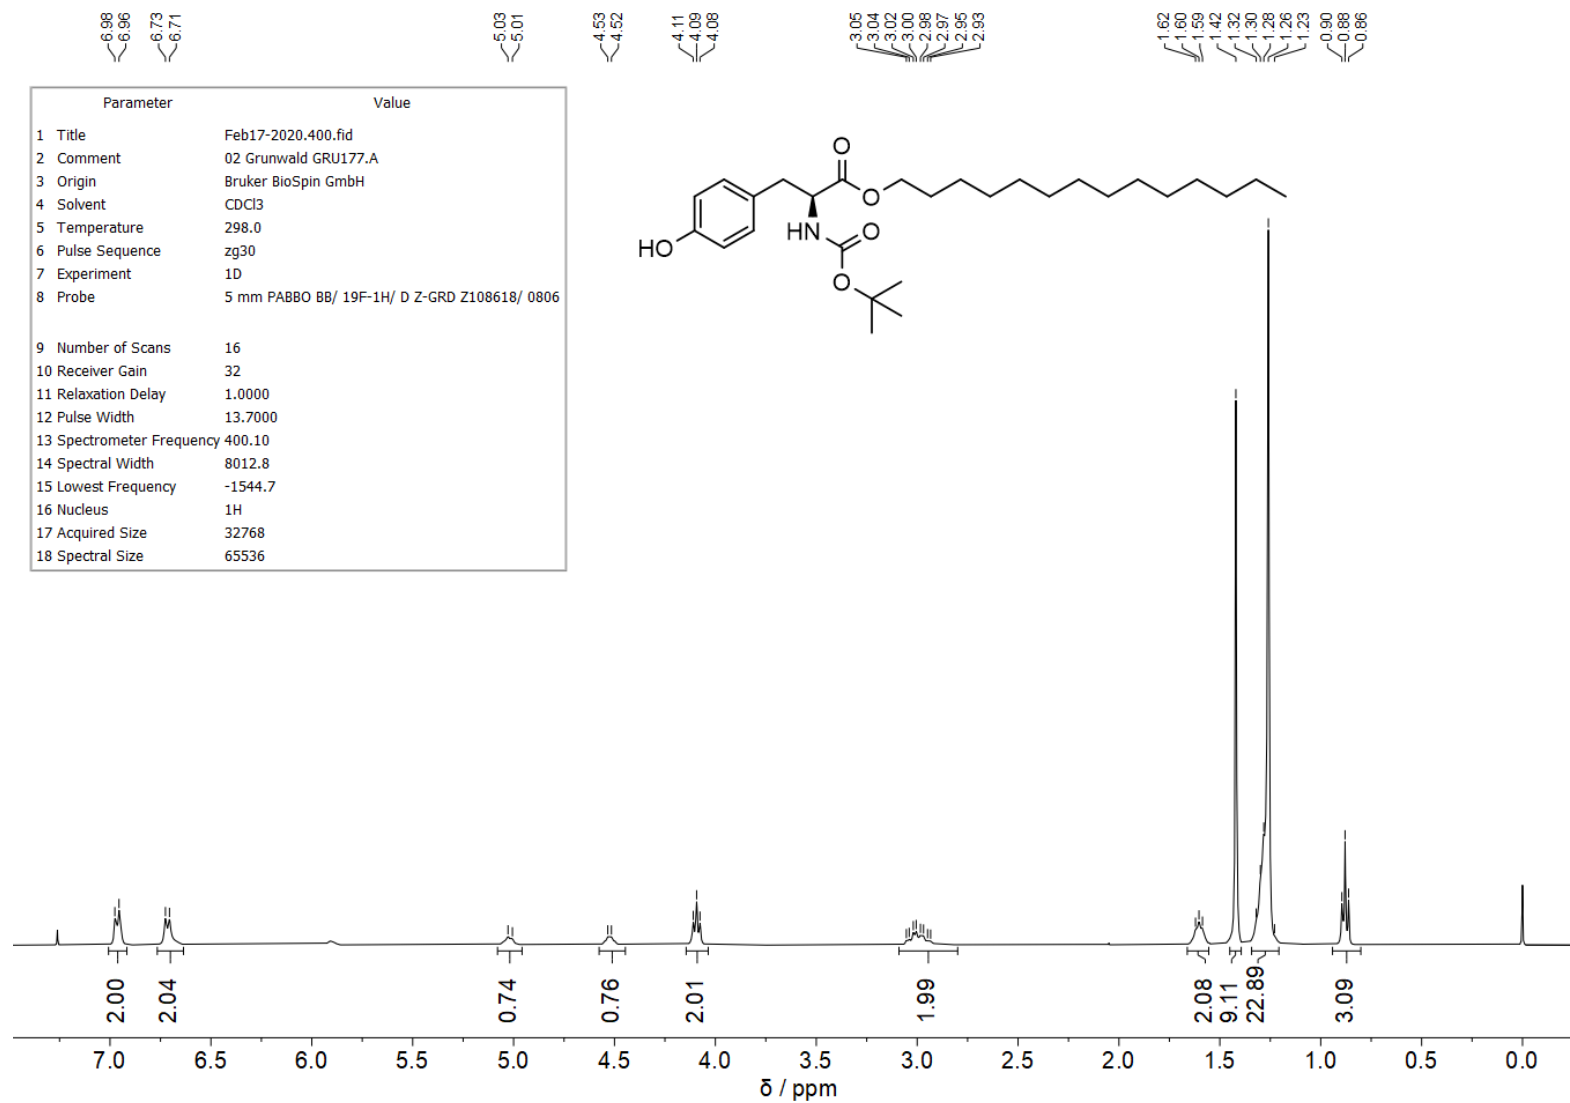



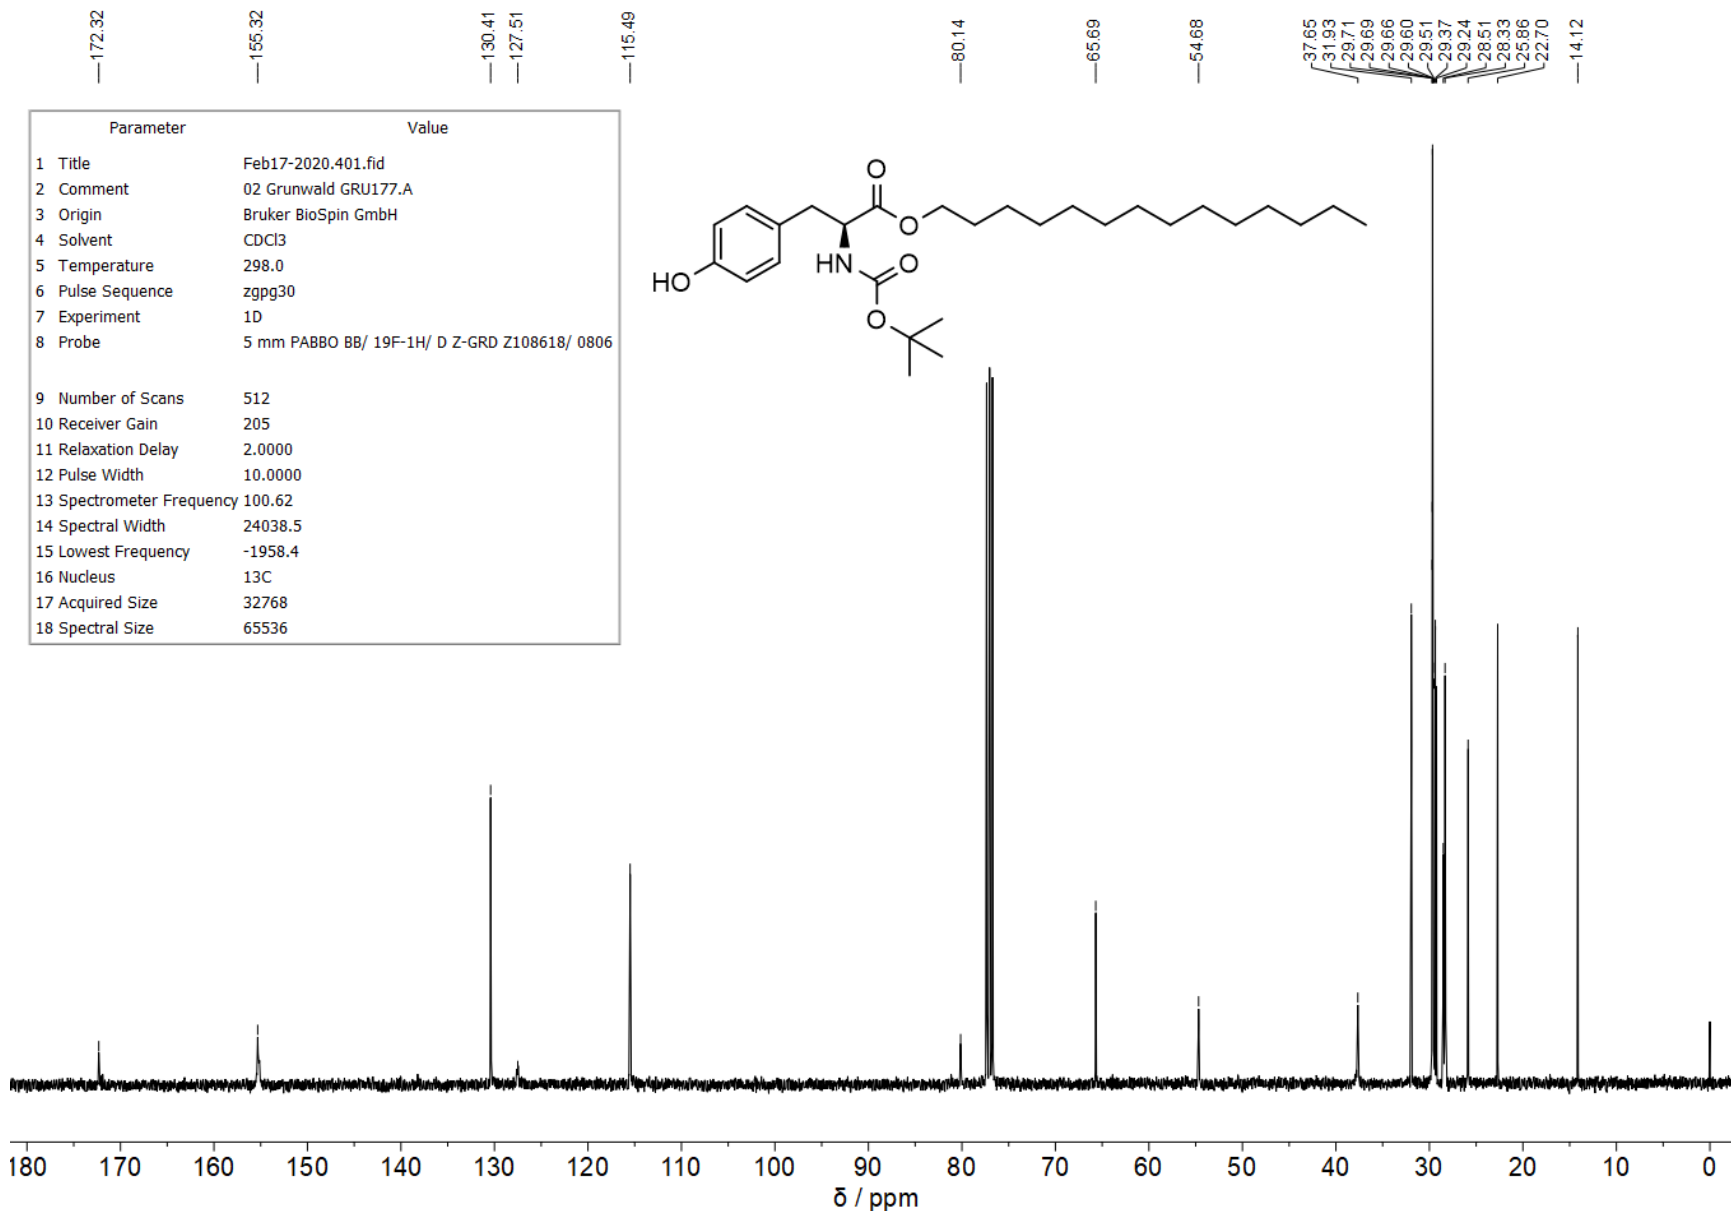

BzTyrC10Boc

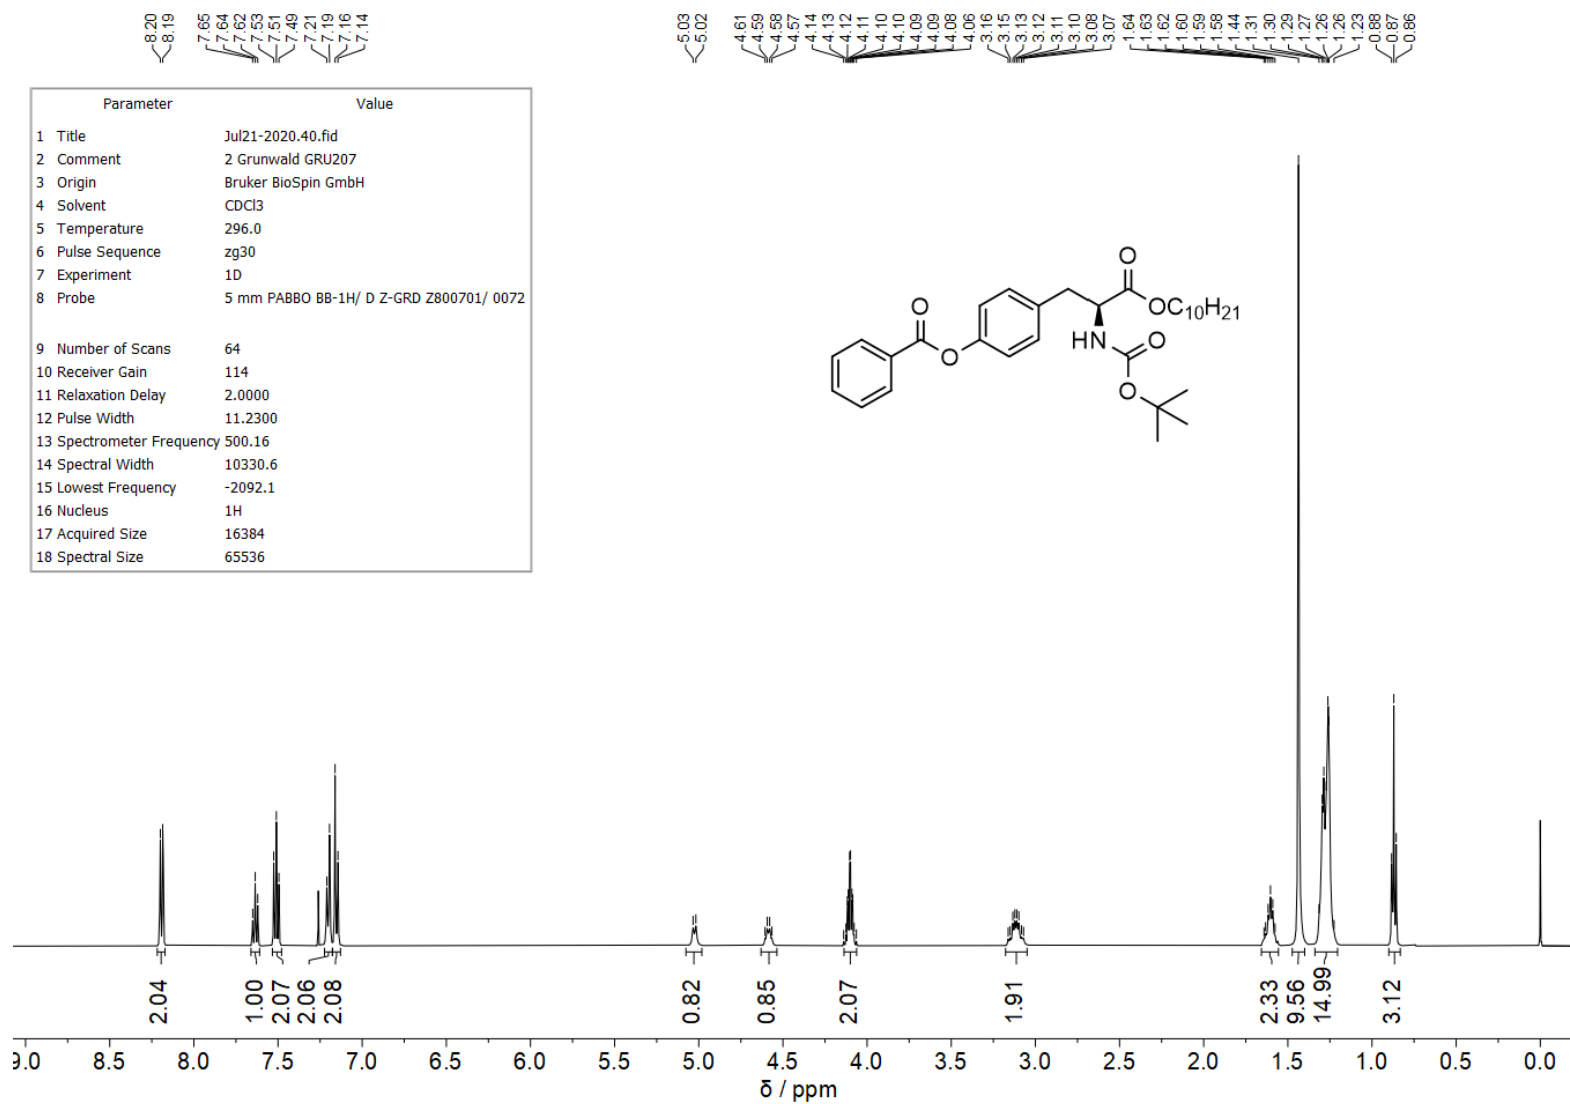

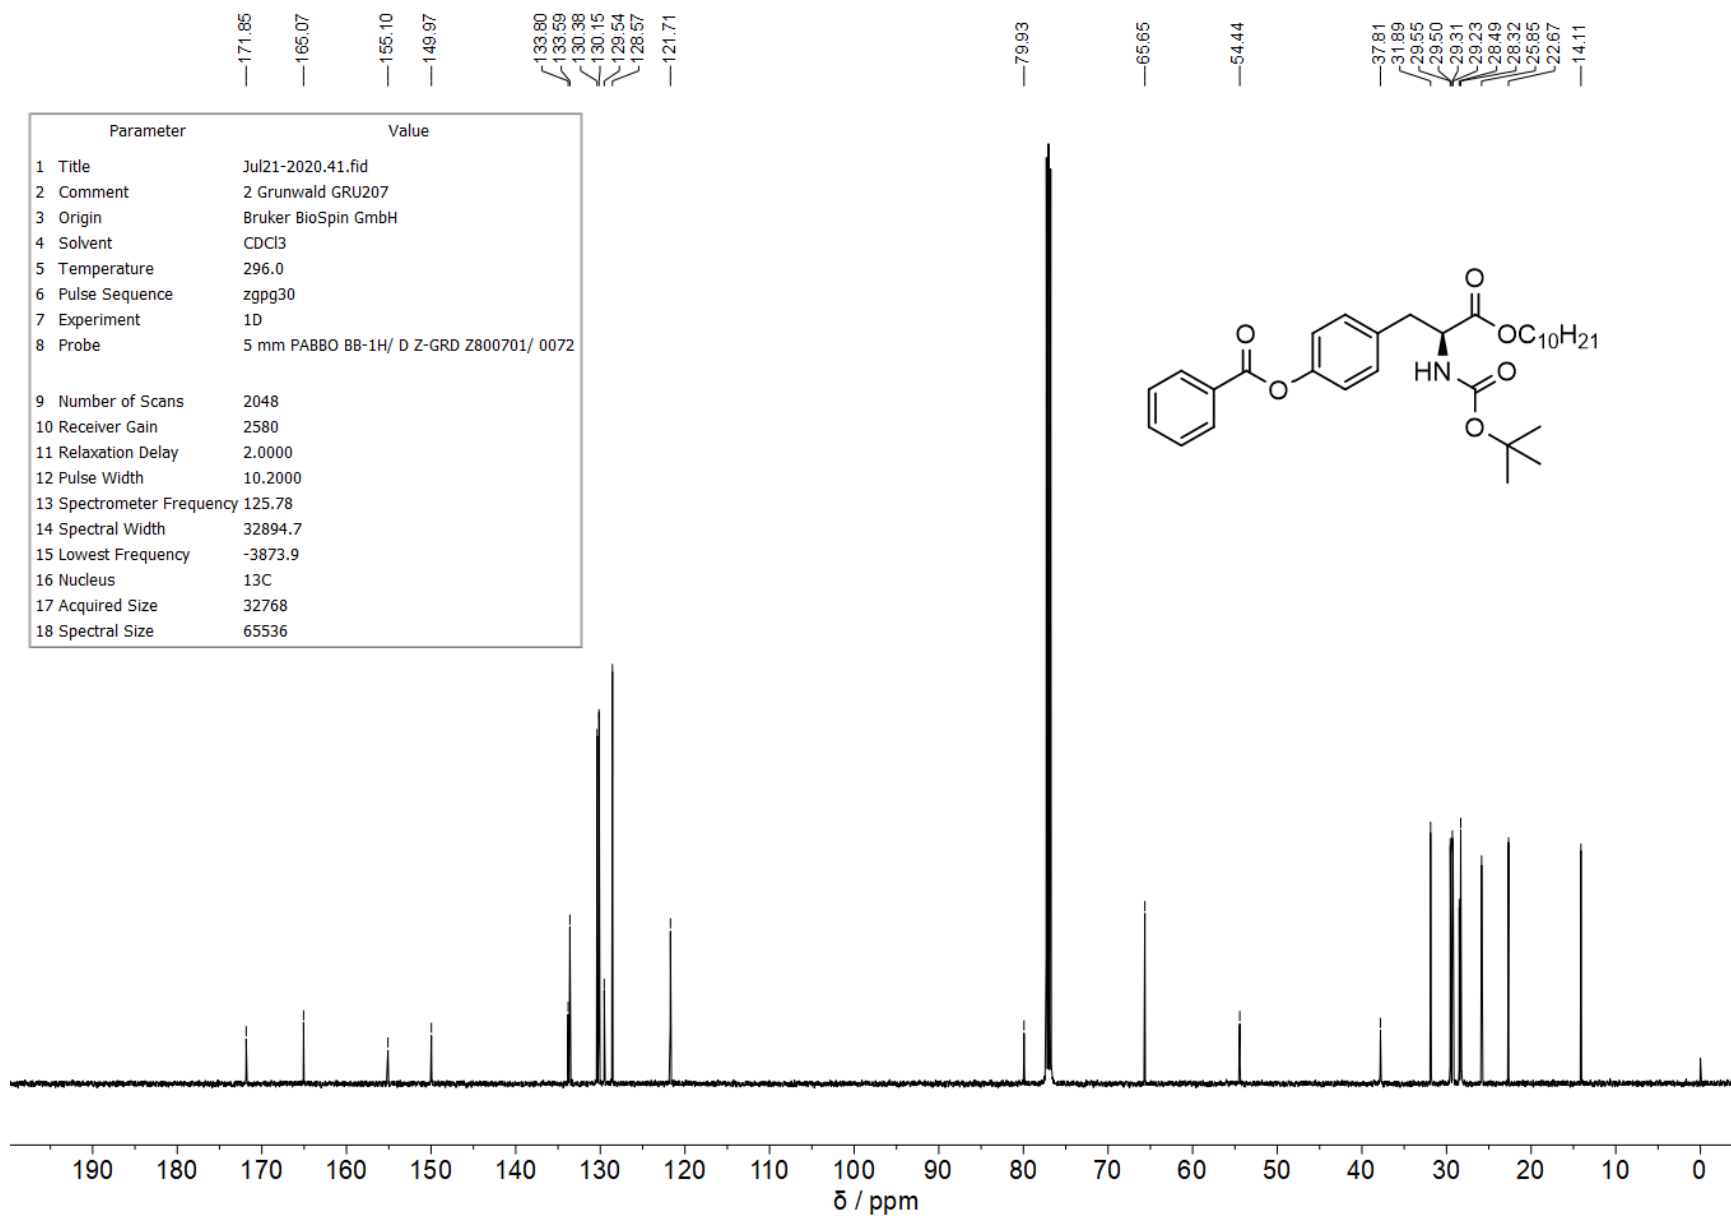

## BzTyrC12Boc

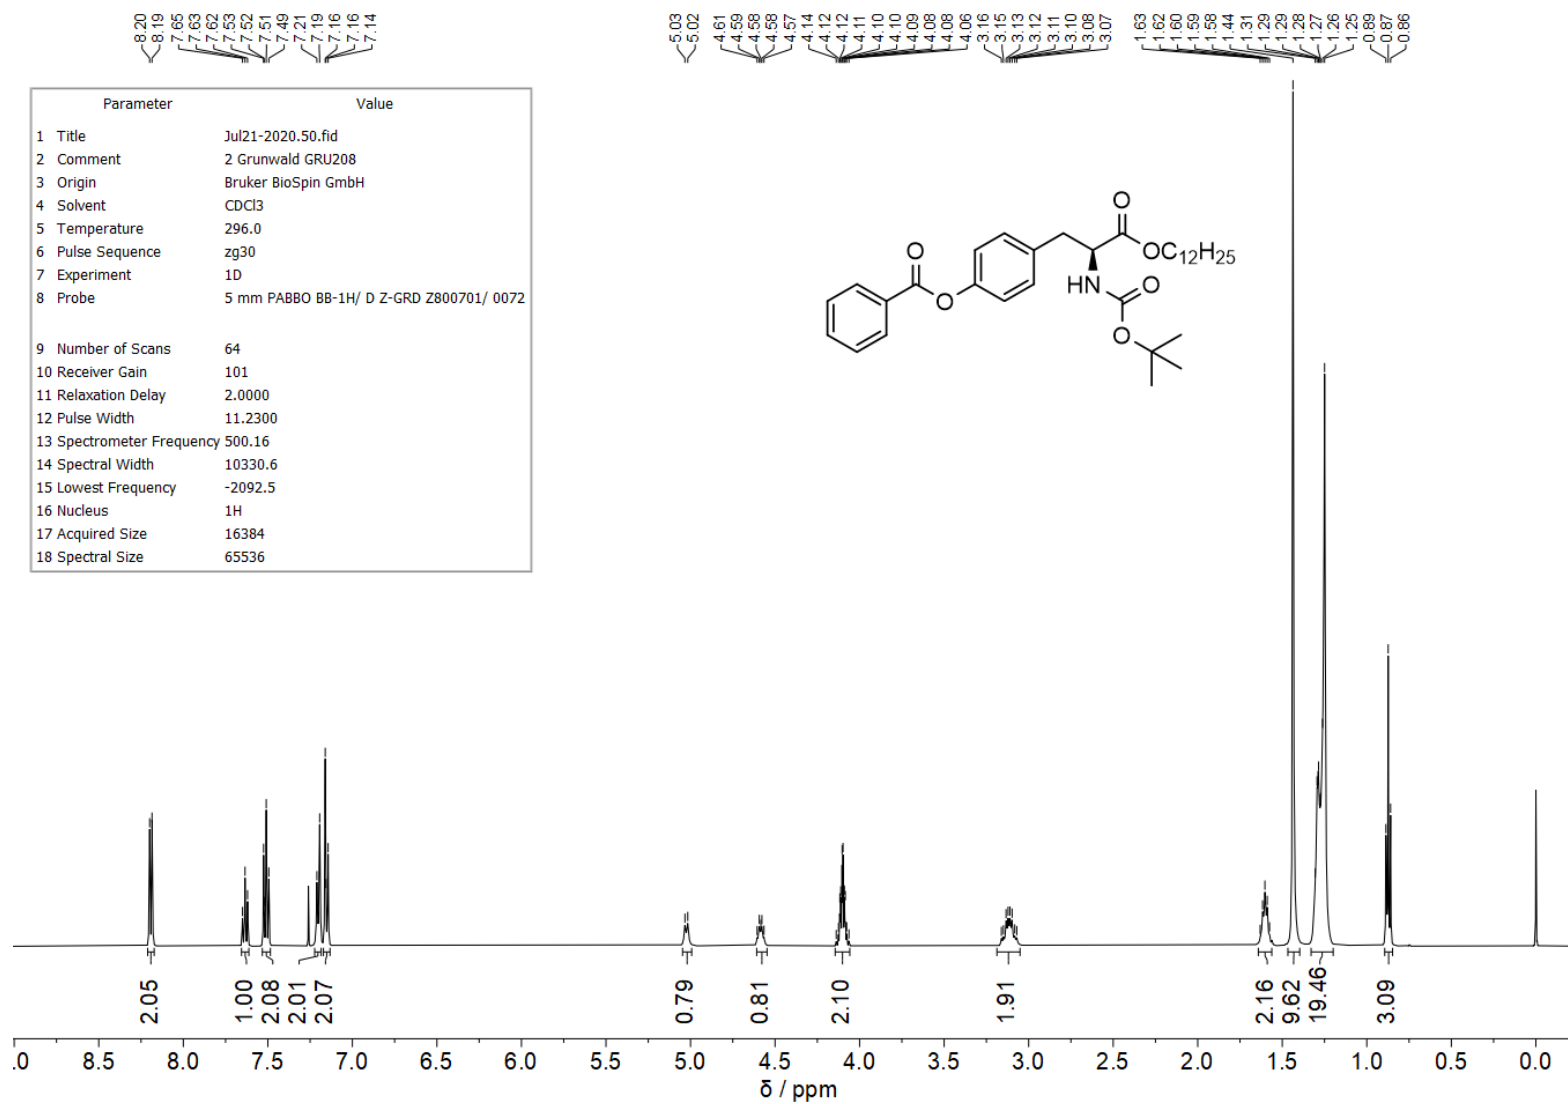

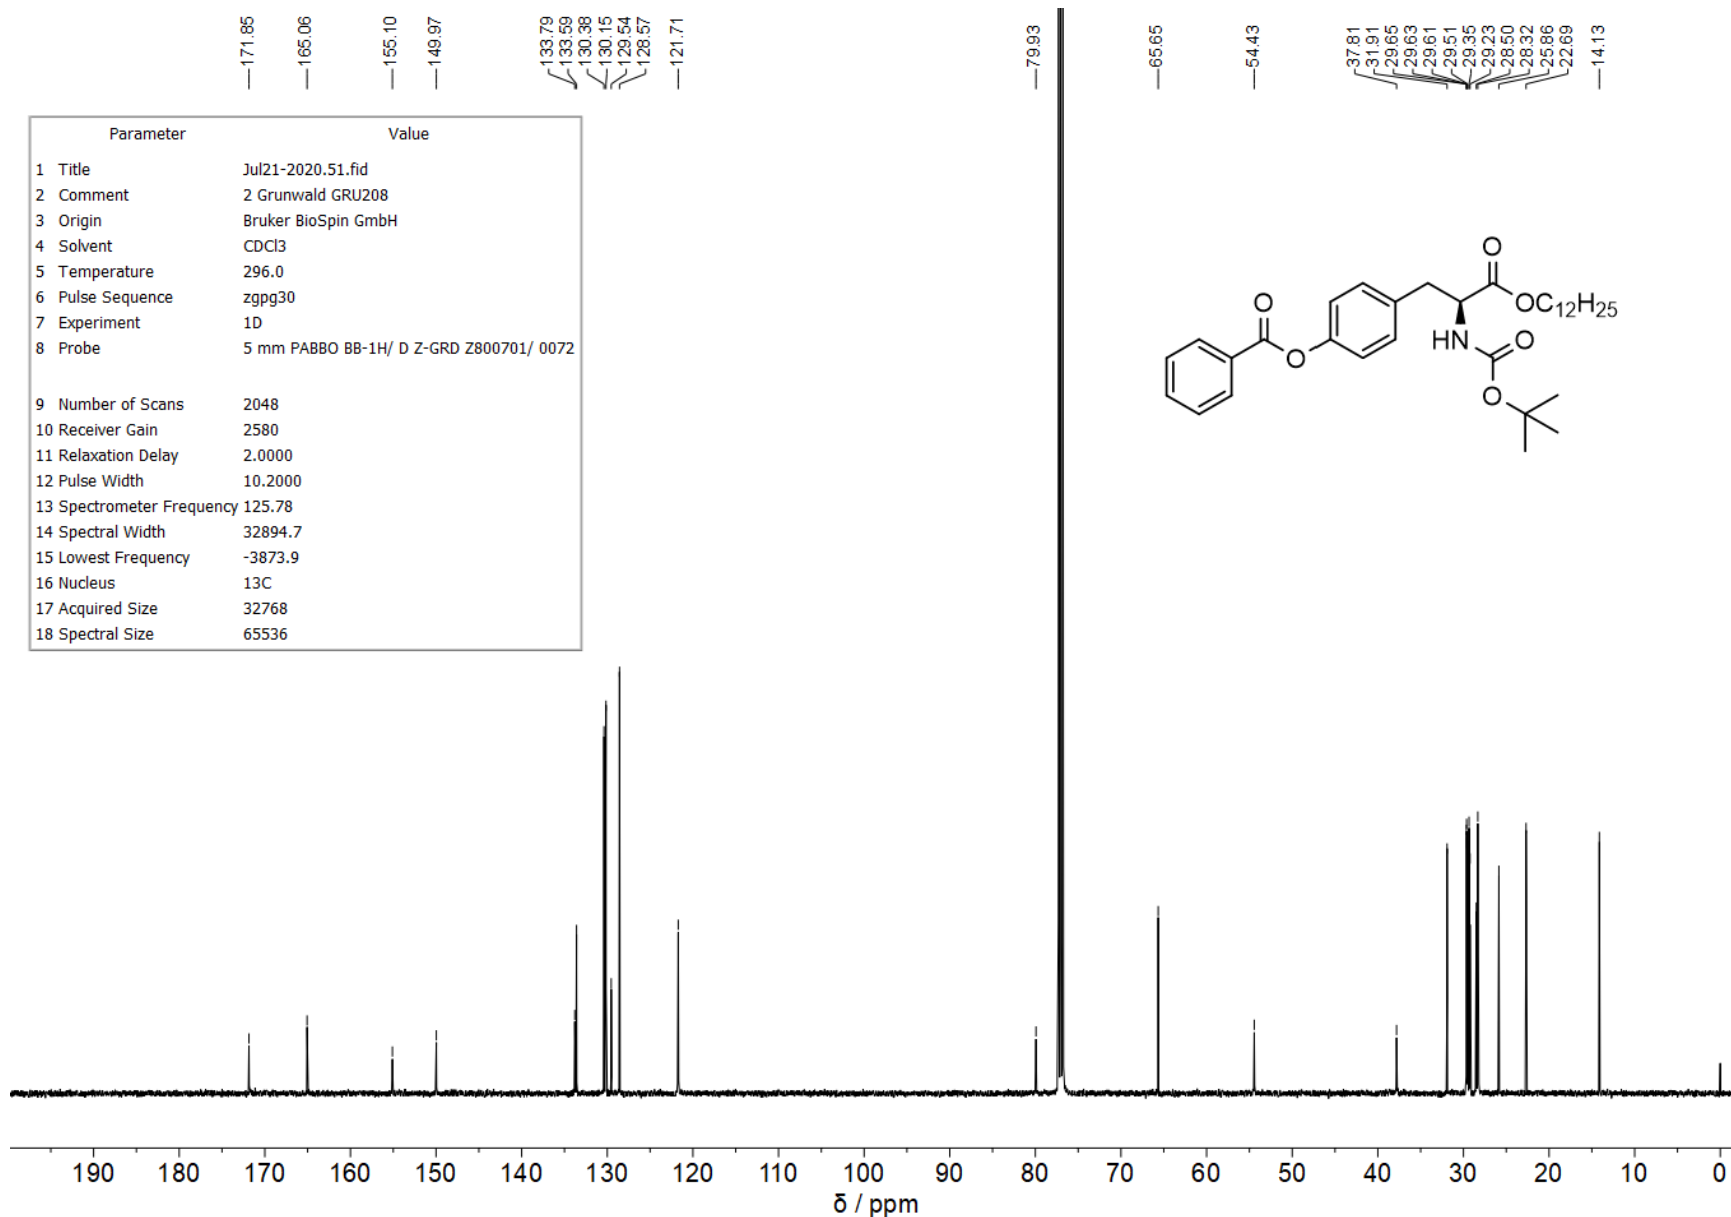

## BzTyrC14Boc

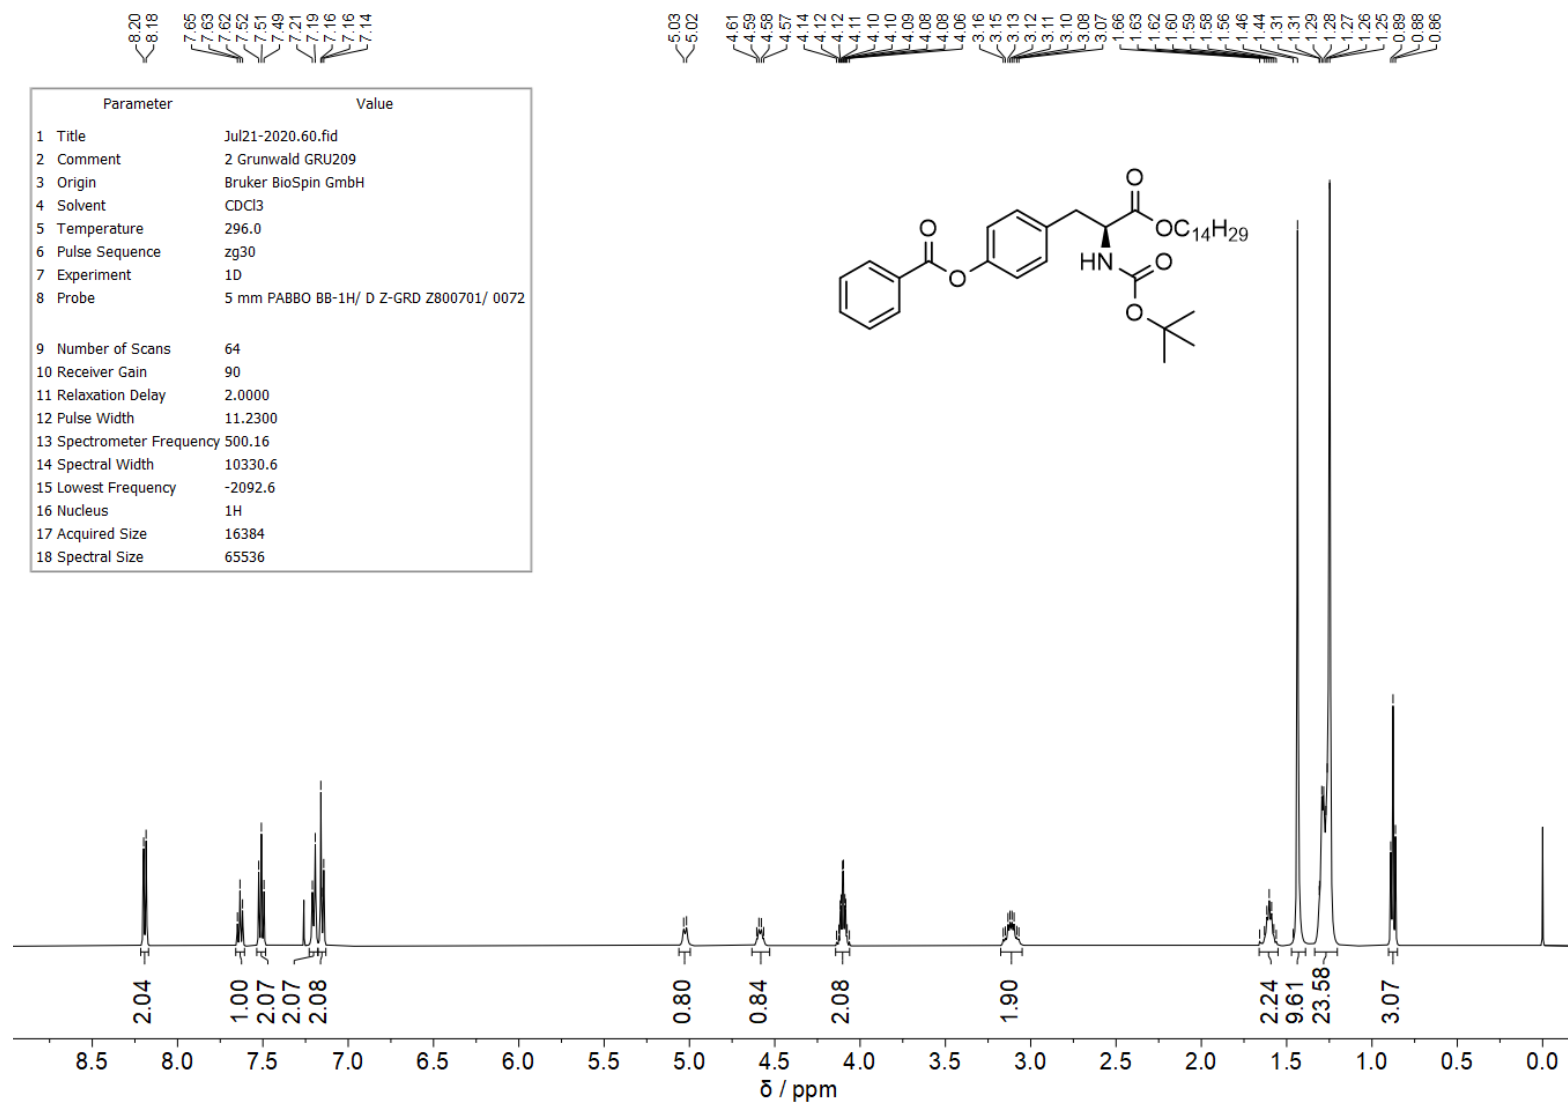

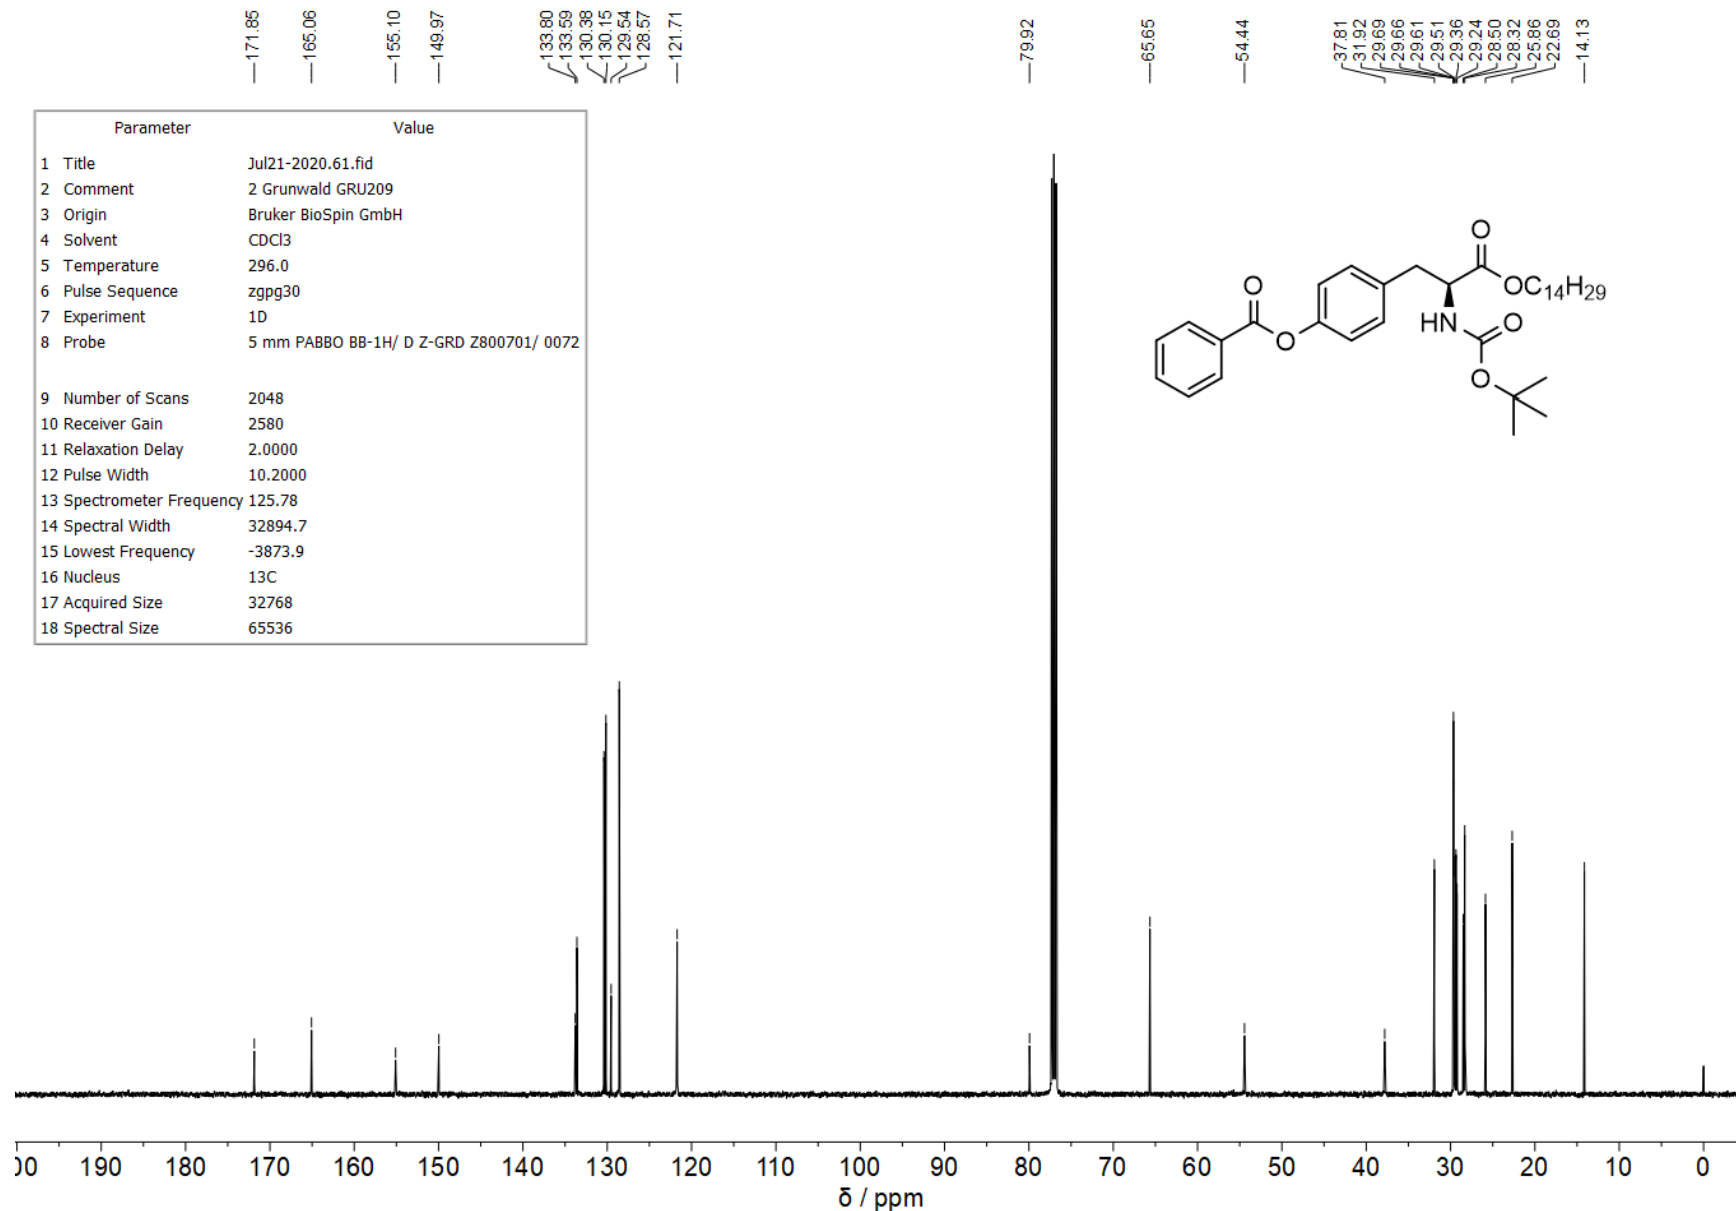

4-C<sub>10</sub>TyrC<sub>10</sub>Boc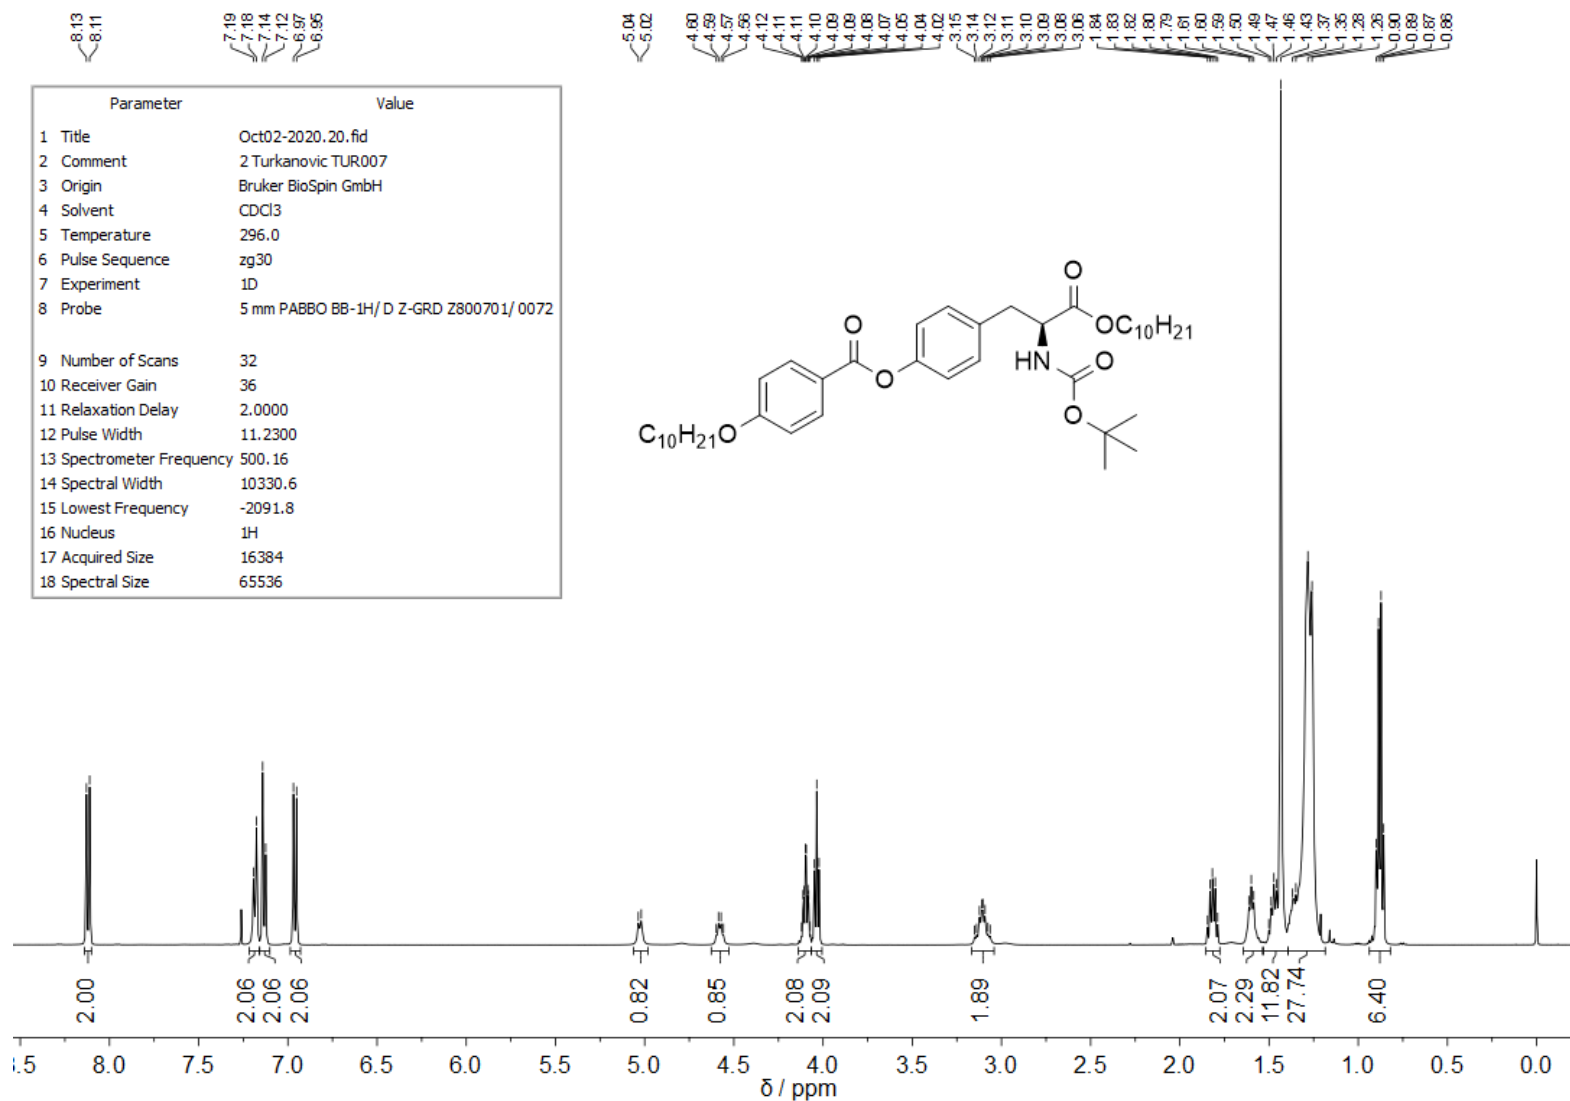



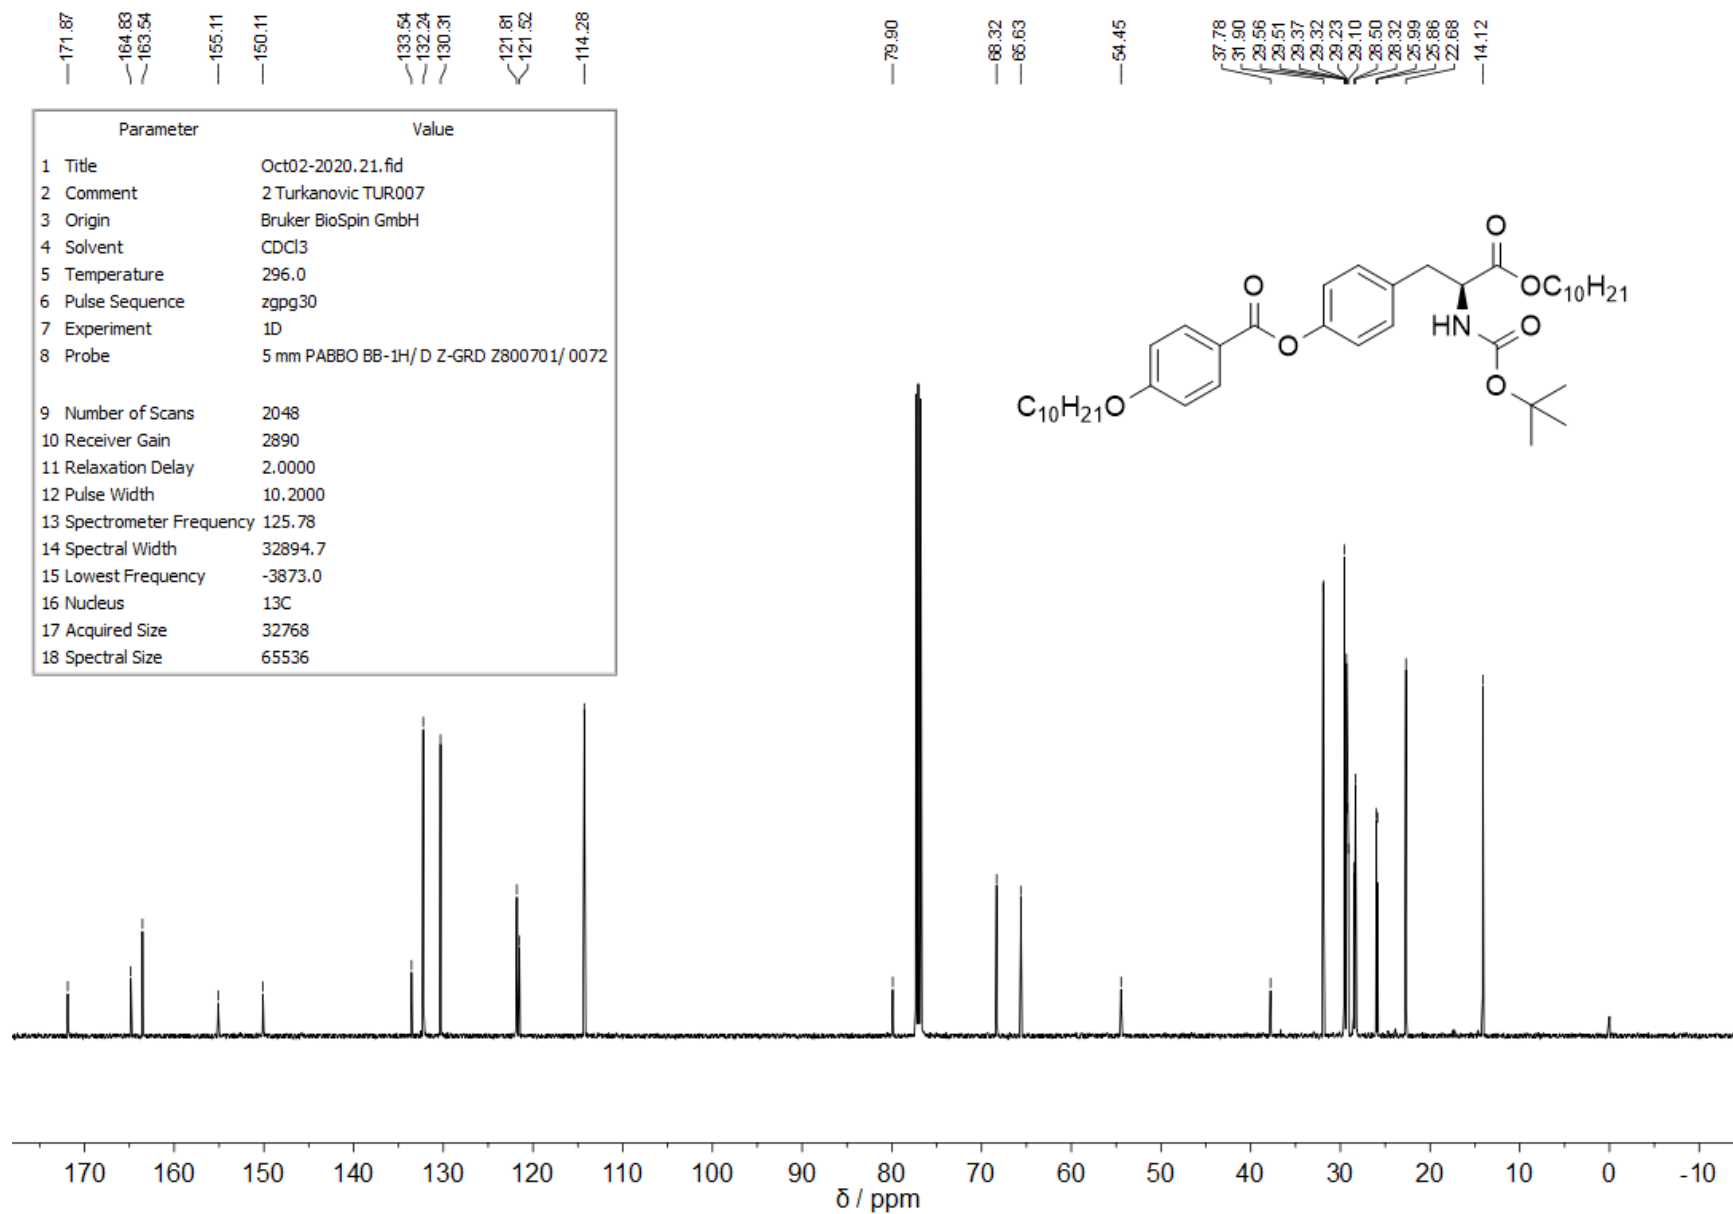

4-C<sub>12</sub>TyrC<sub>10</sub>Boc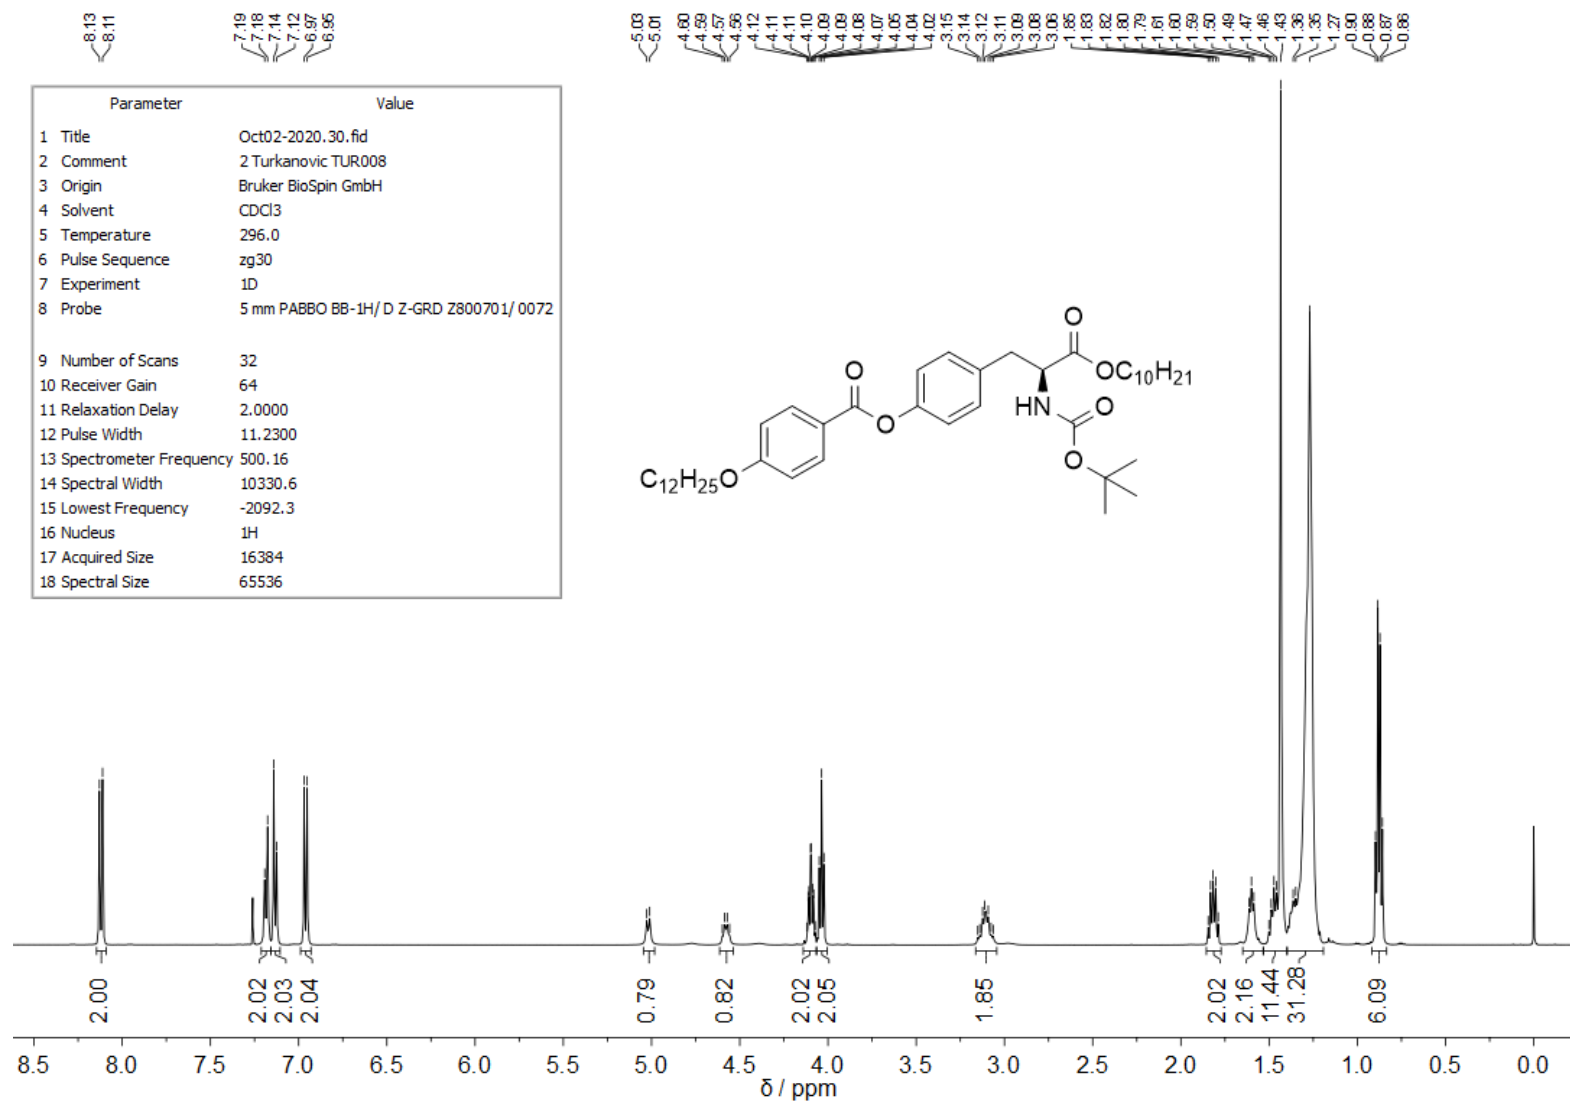

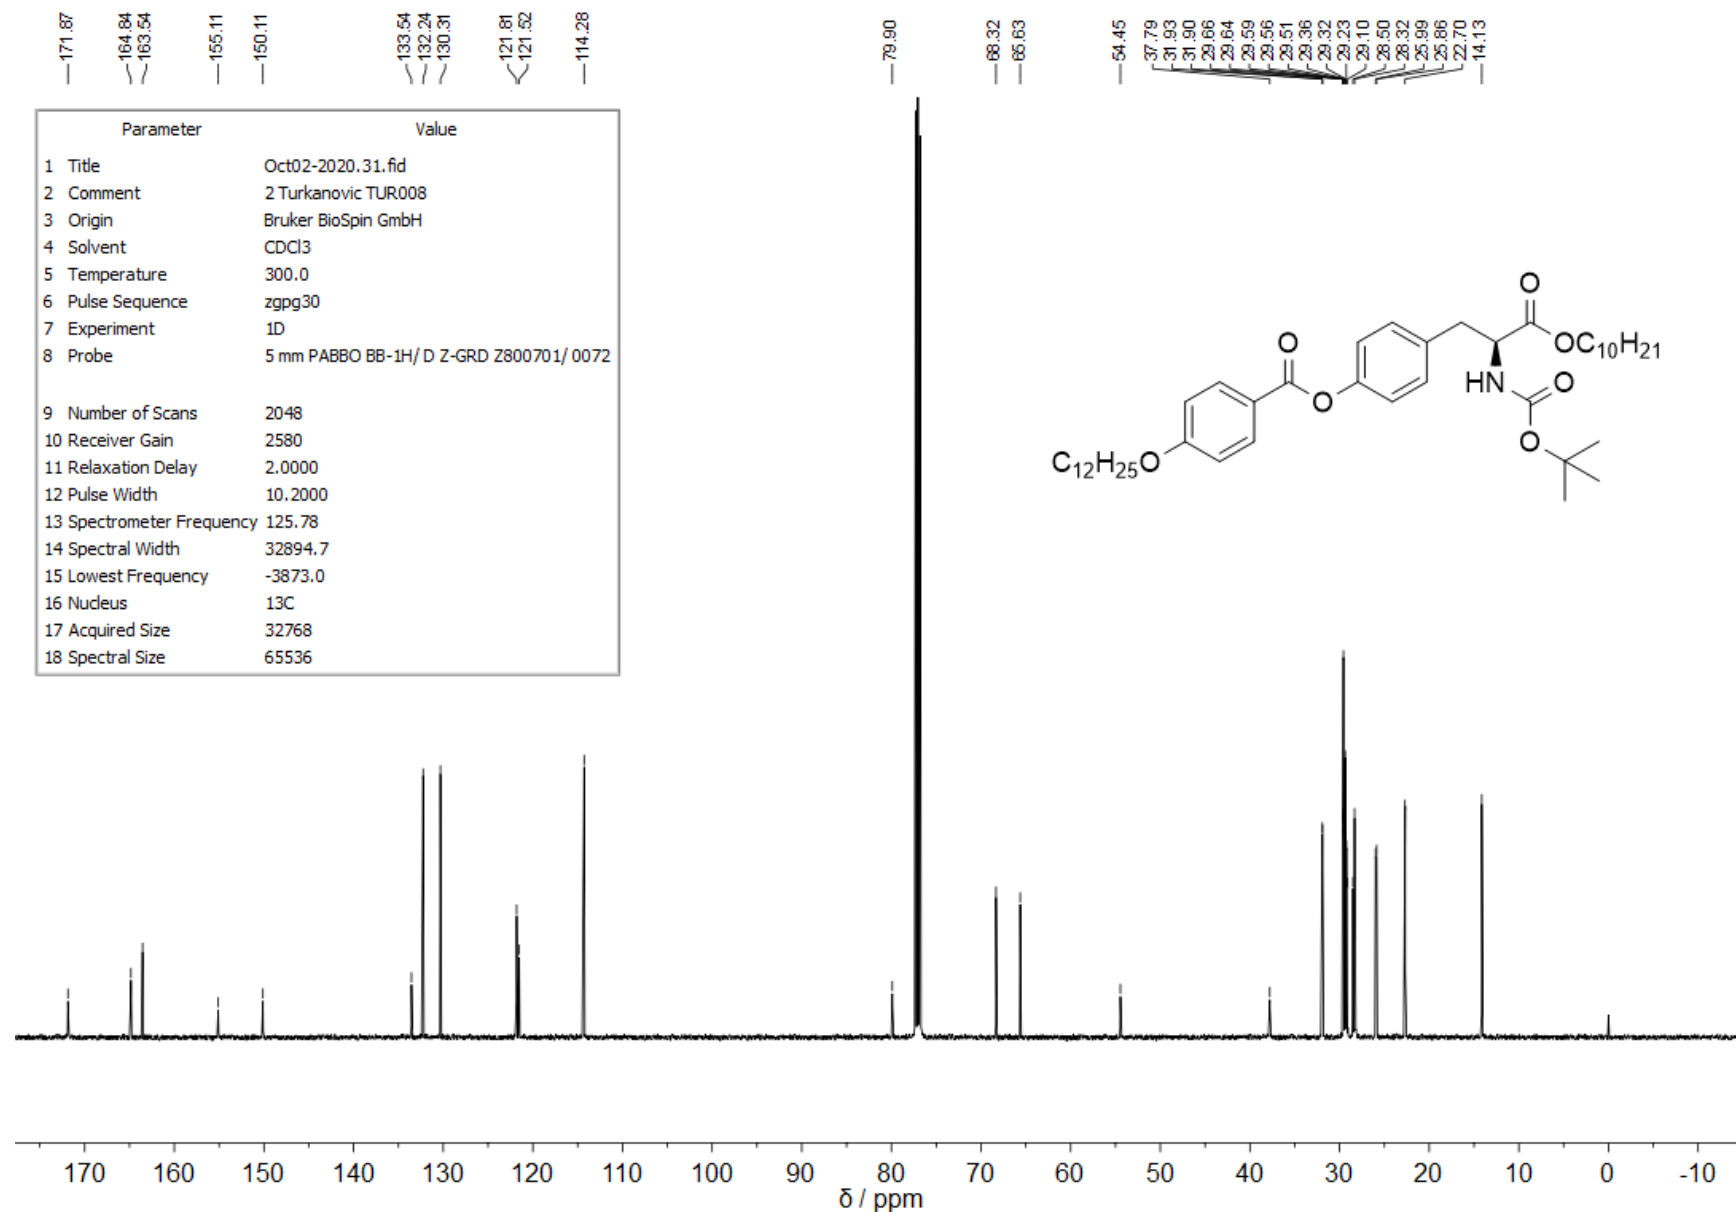

4-C<sub>14</sub>TyrC<sub>10</sub>Boc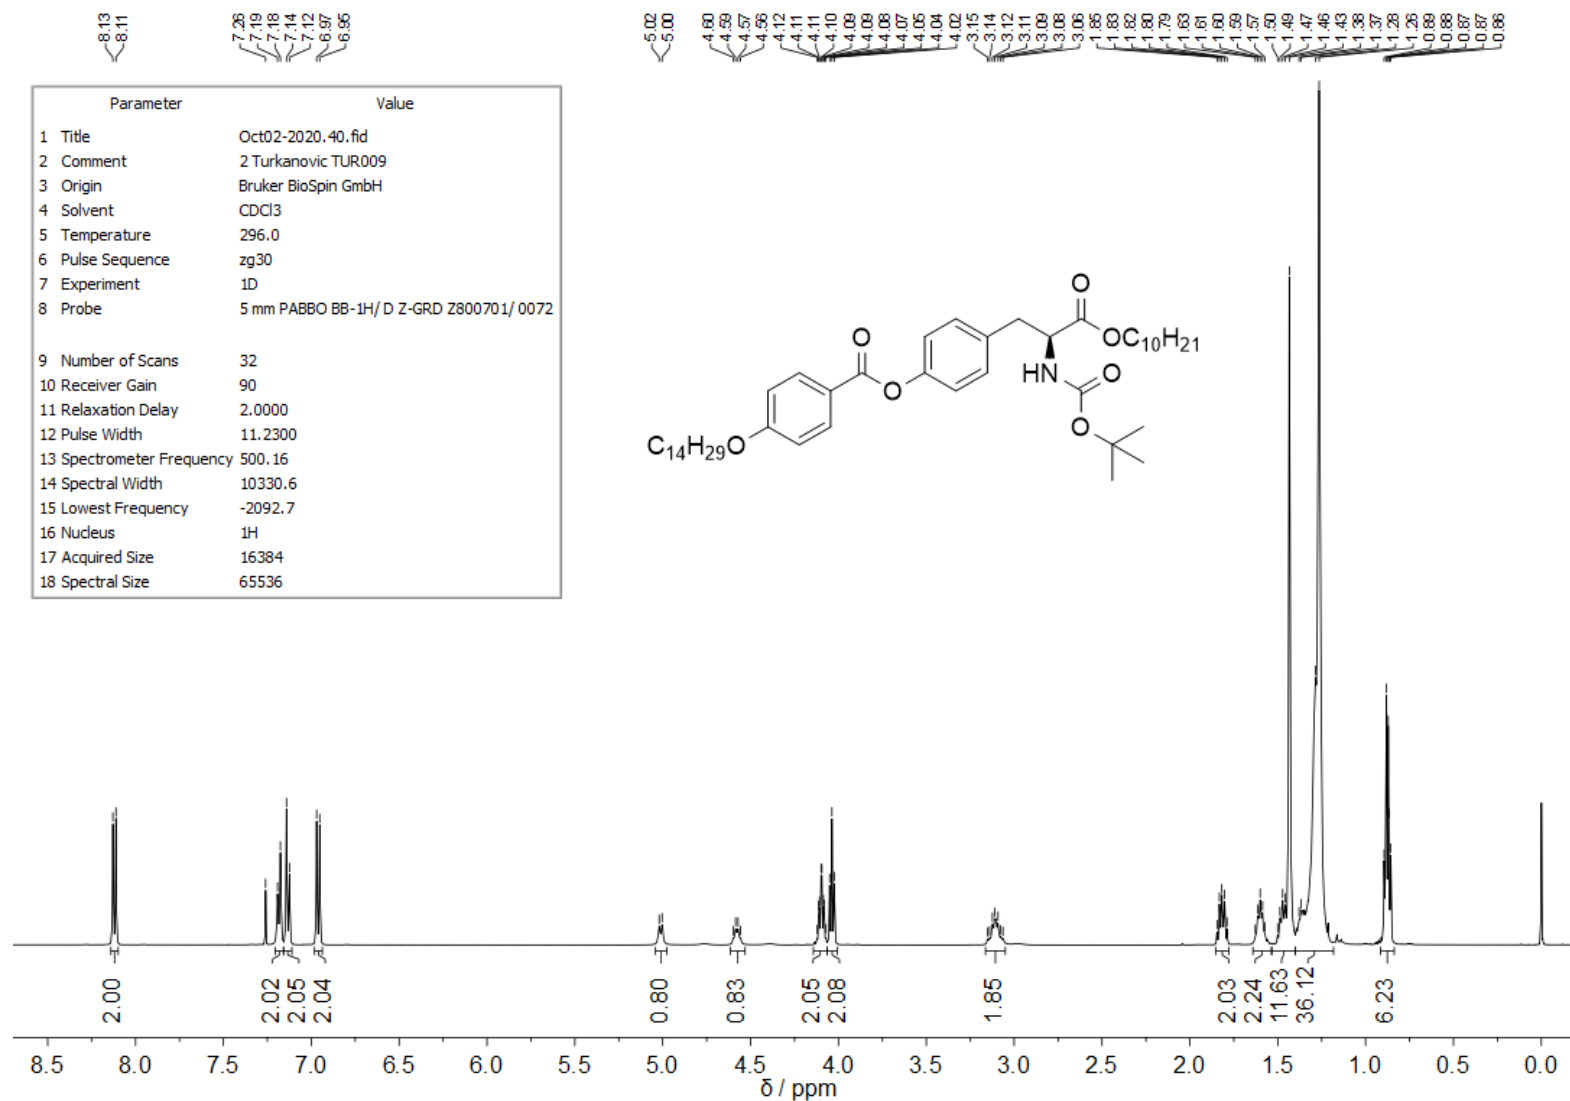

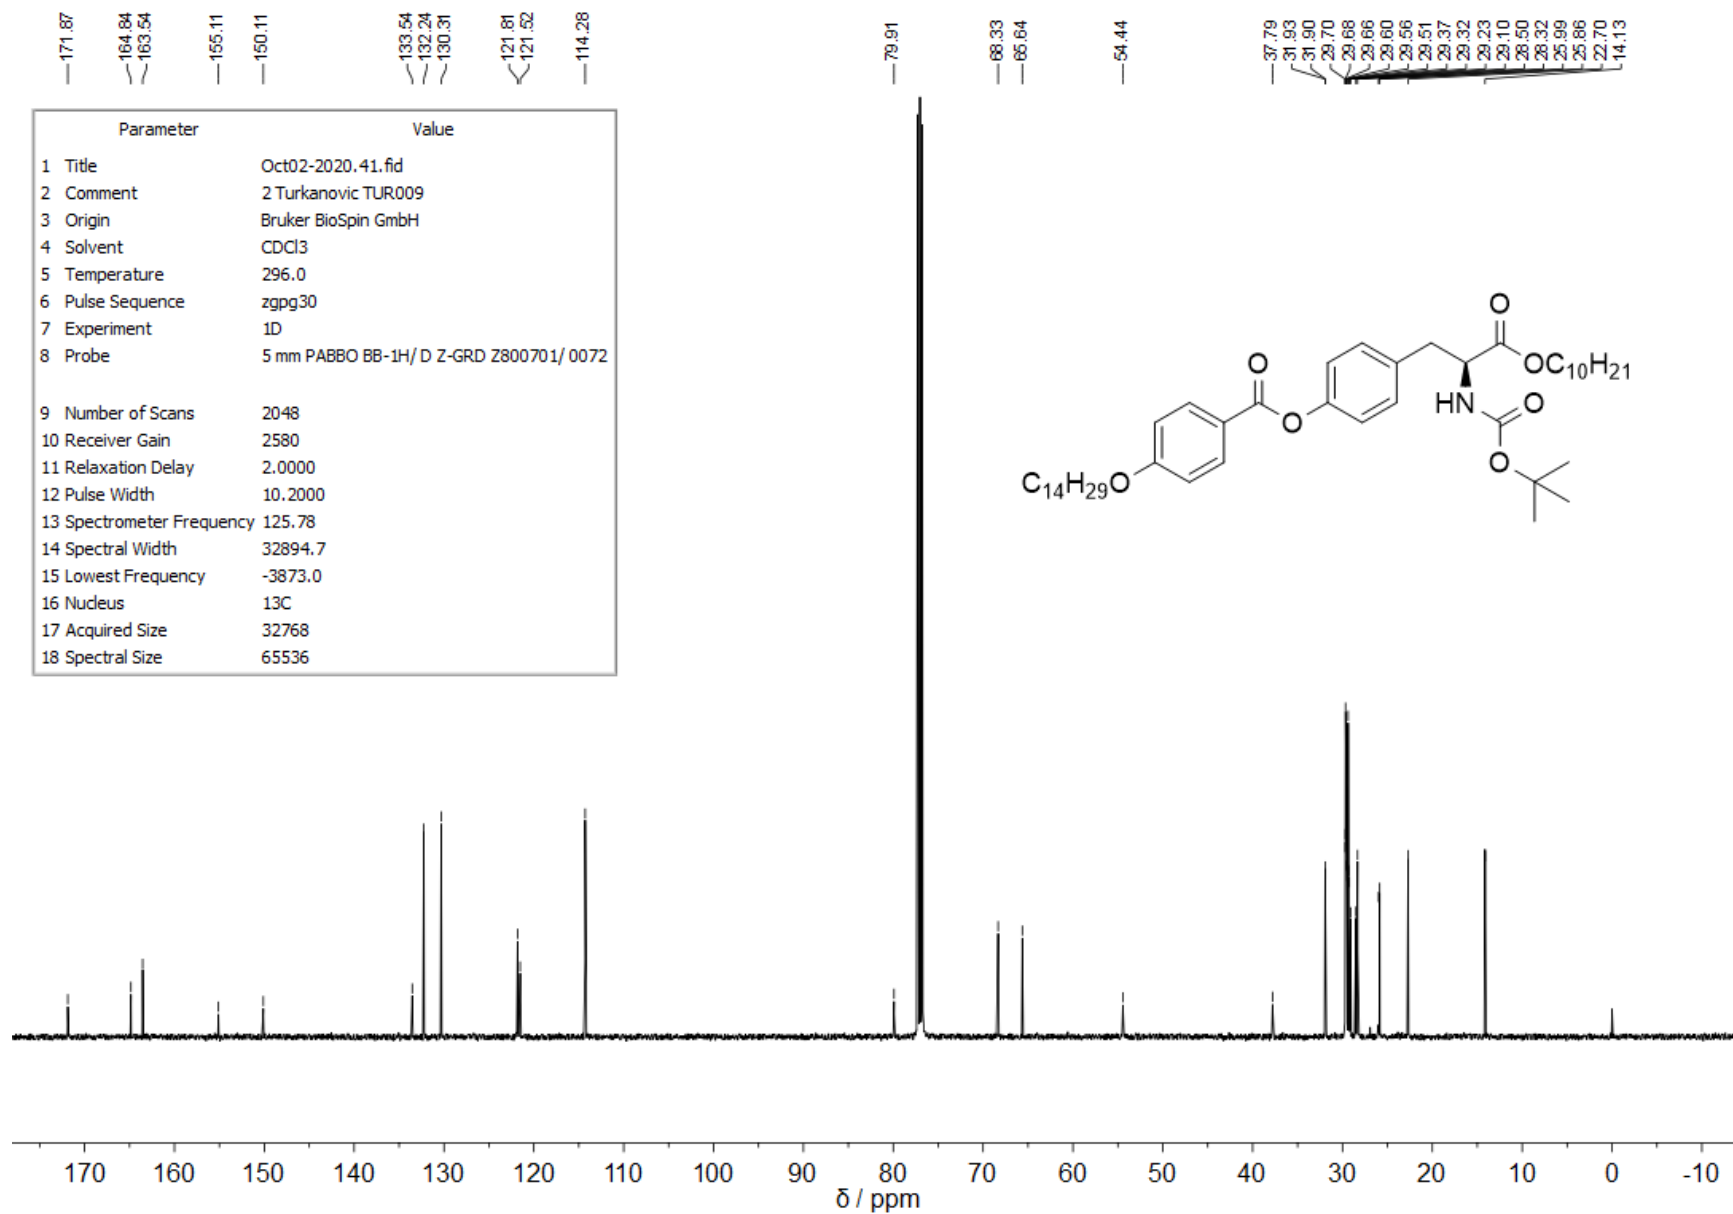

4-C<sub>10</sub>TyrC<sub>12</sub>Boc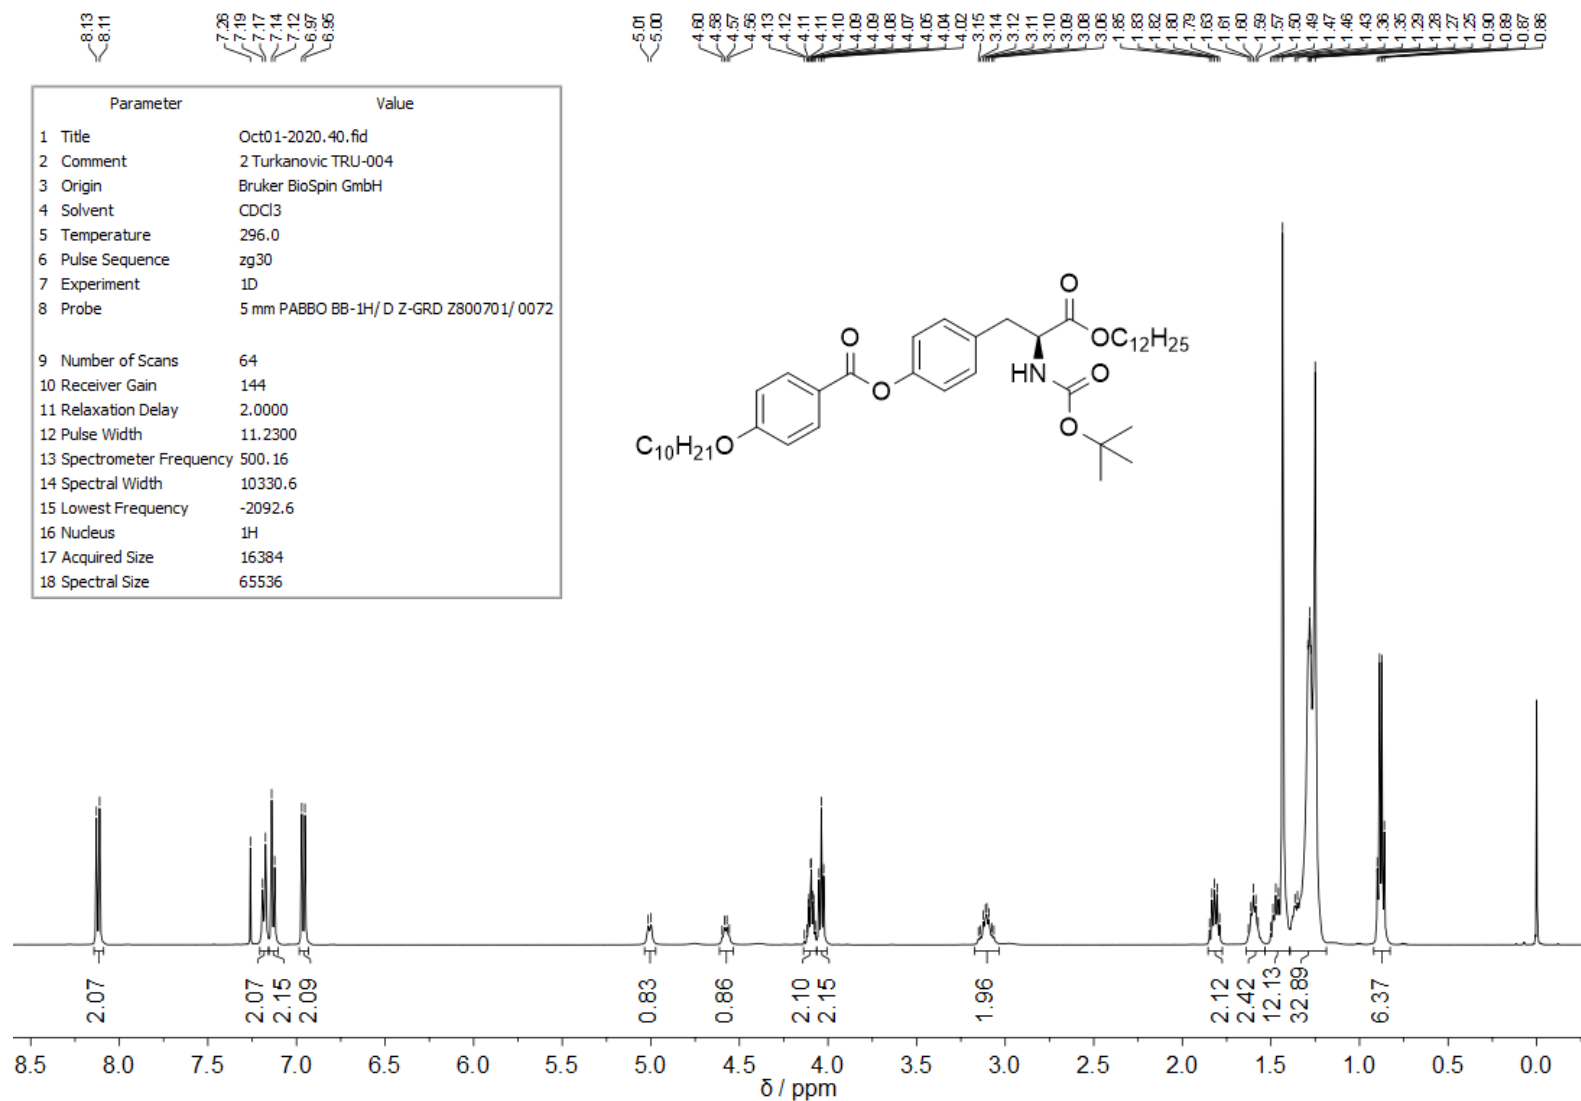

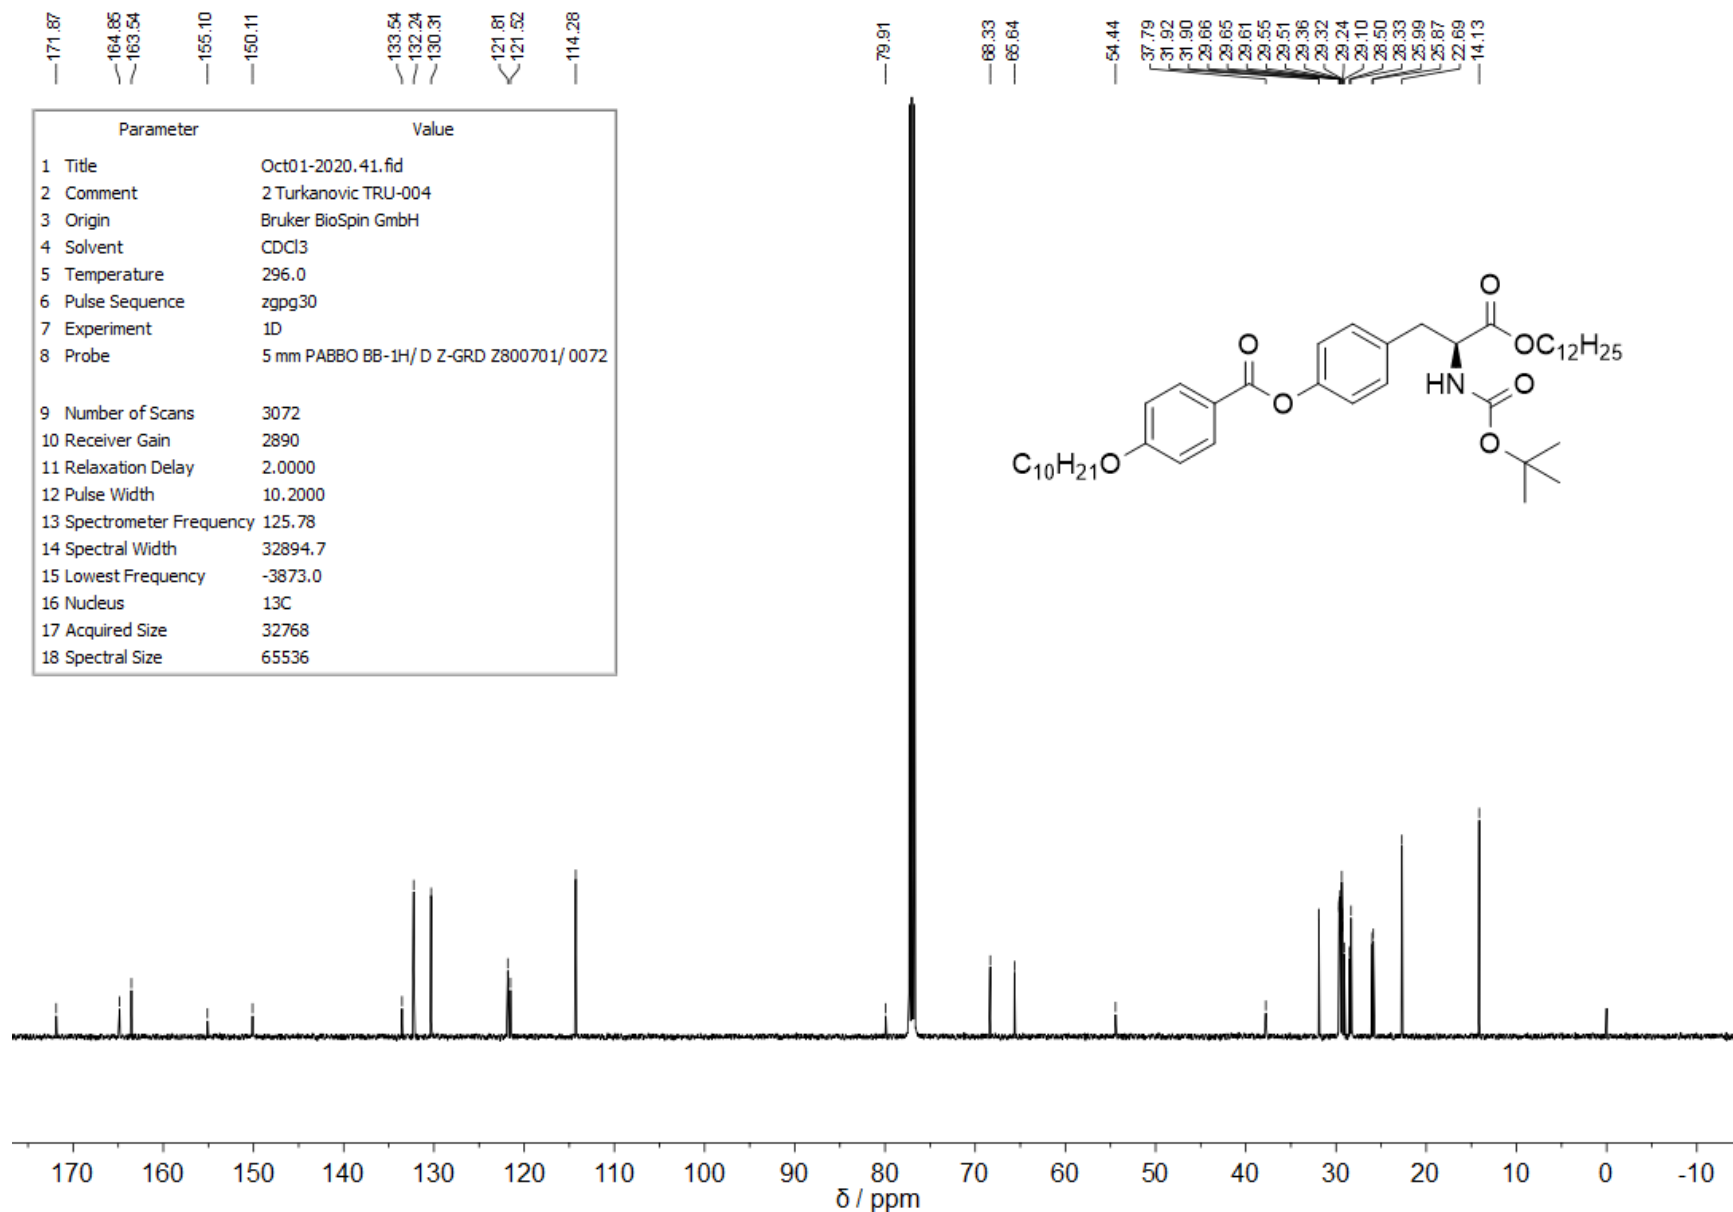

4-C<sub>12</sub>TyrC<sub>12</sub>Boc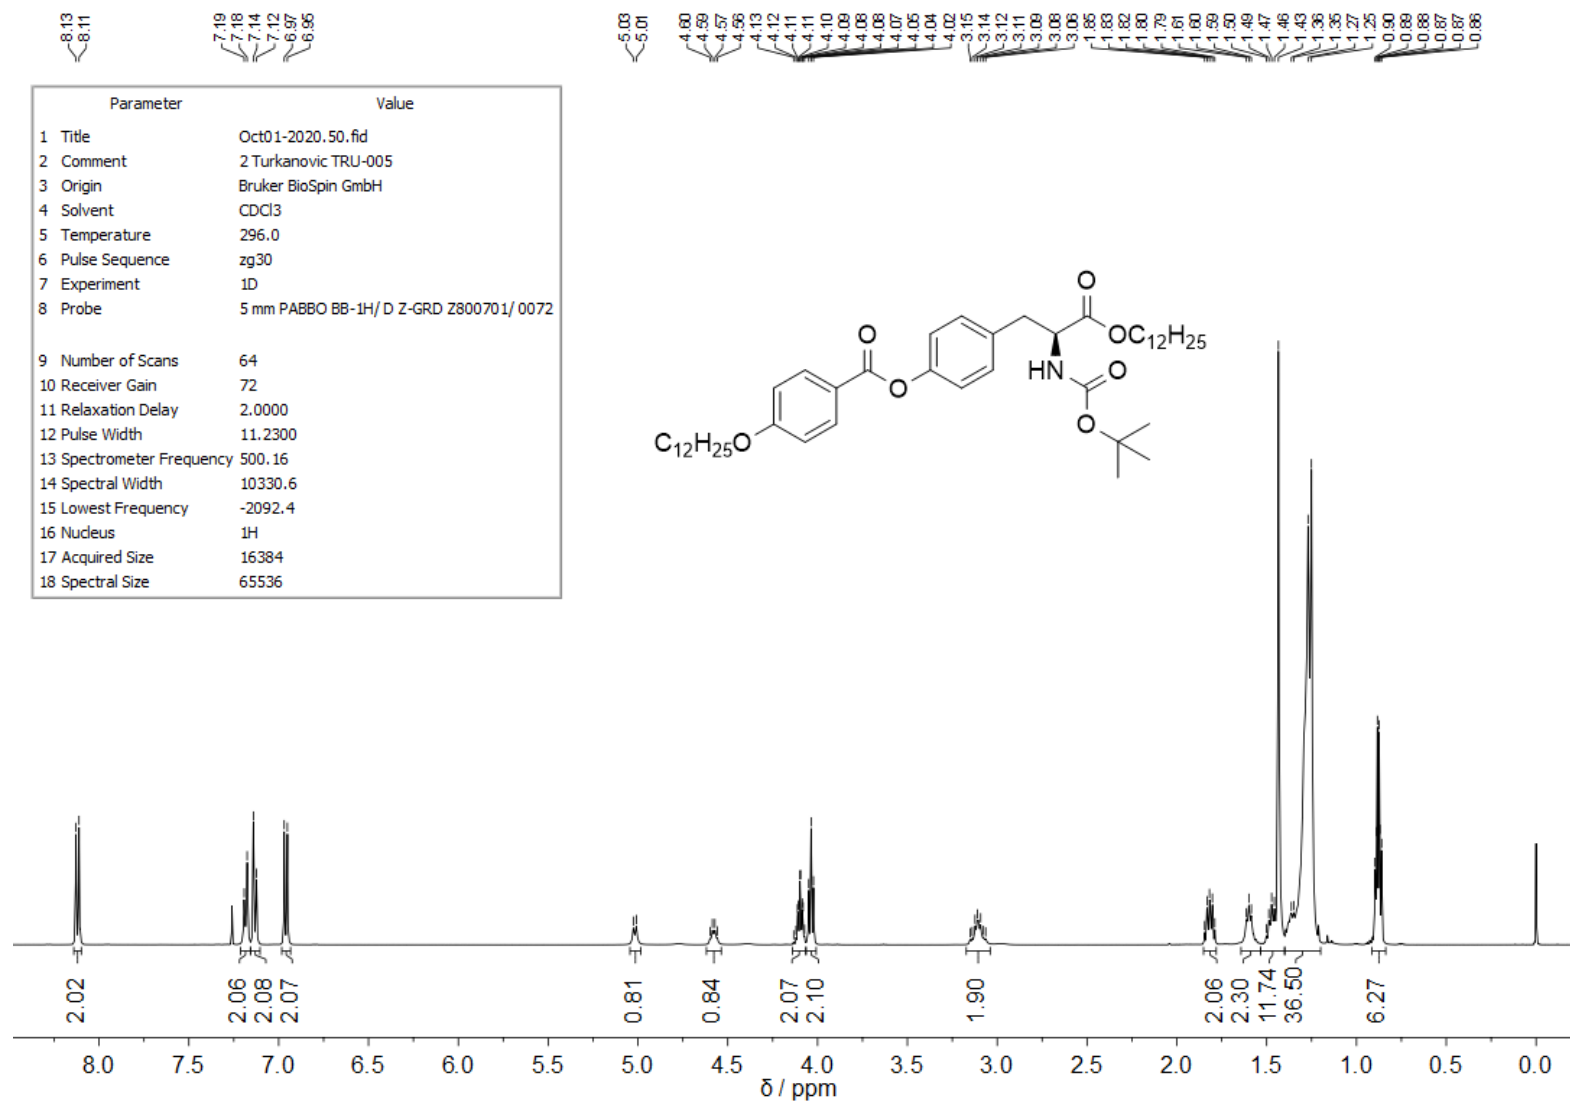



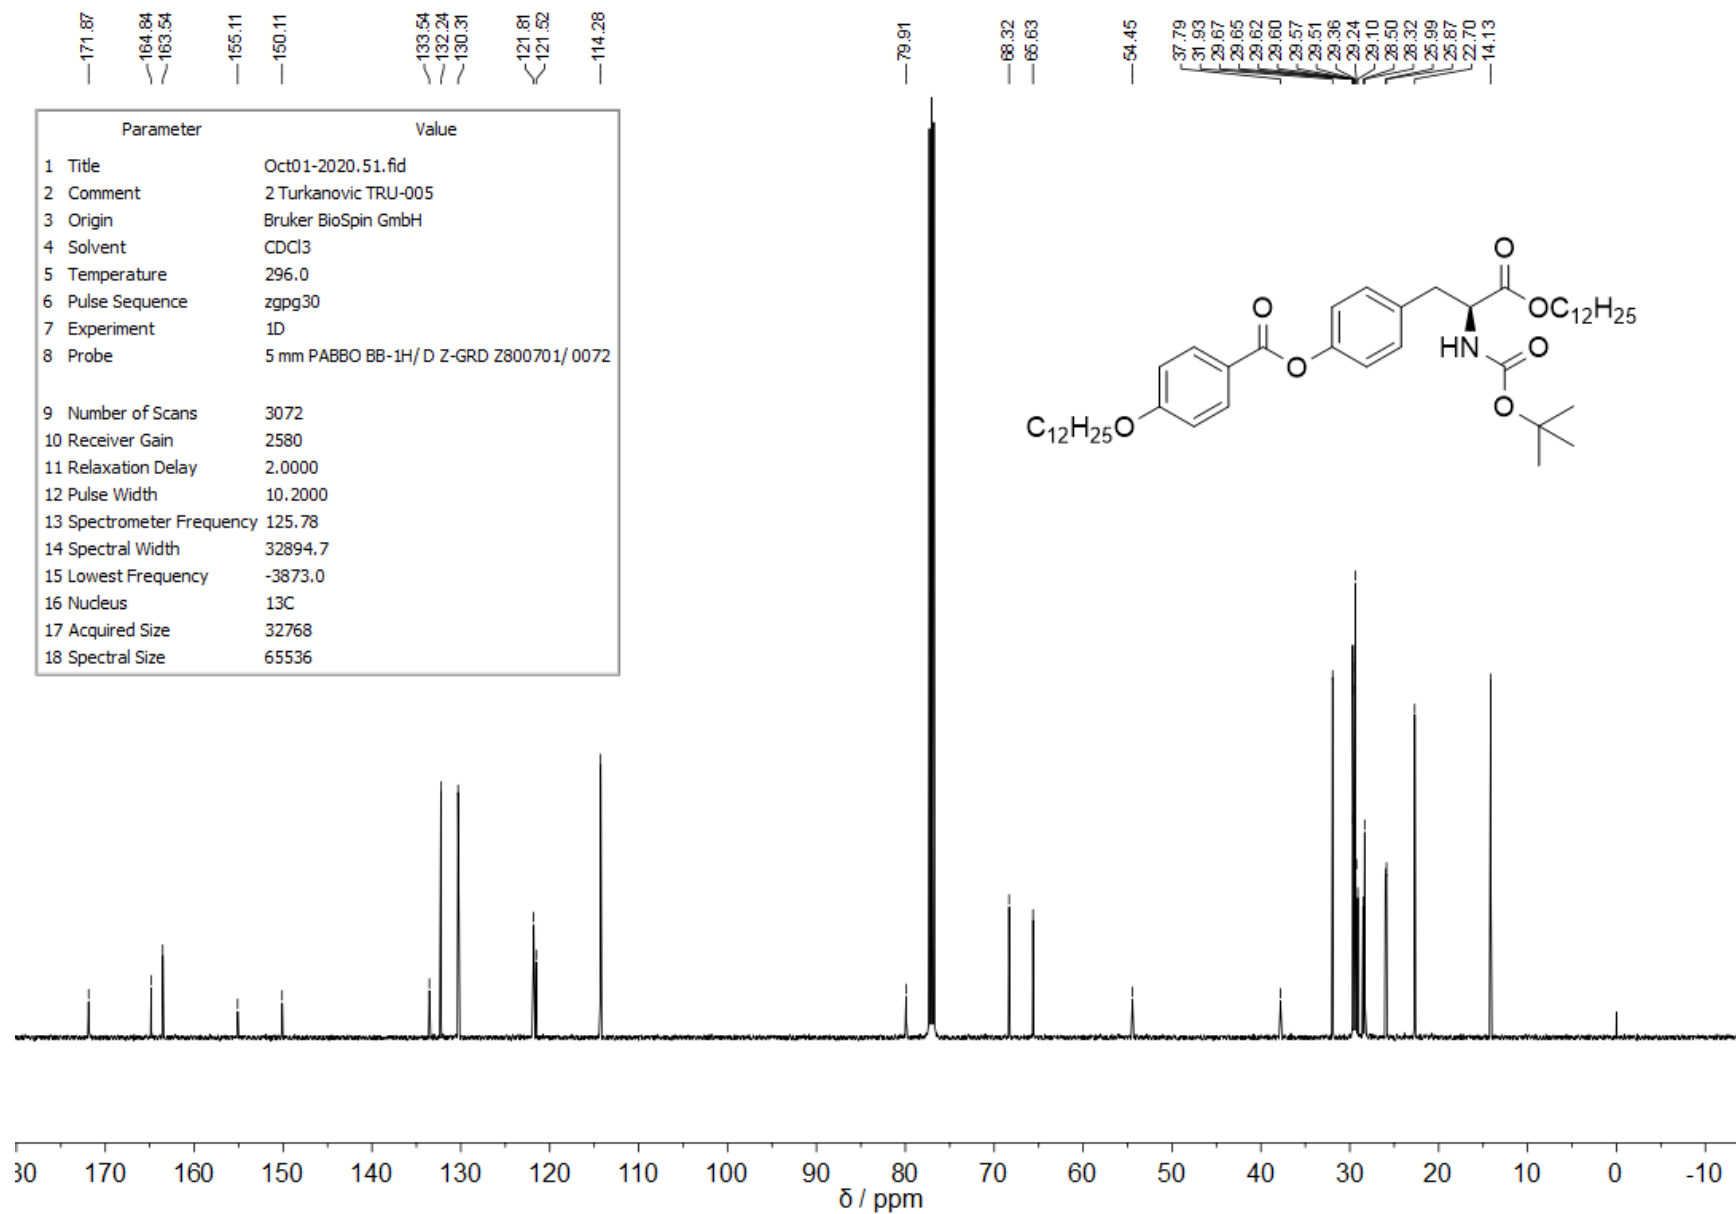

4-C<sub>14</sub>TyrC<sub>12</sub>Boc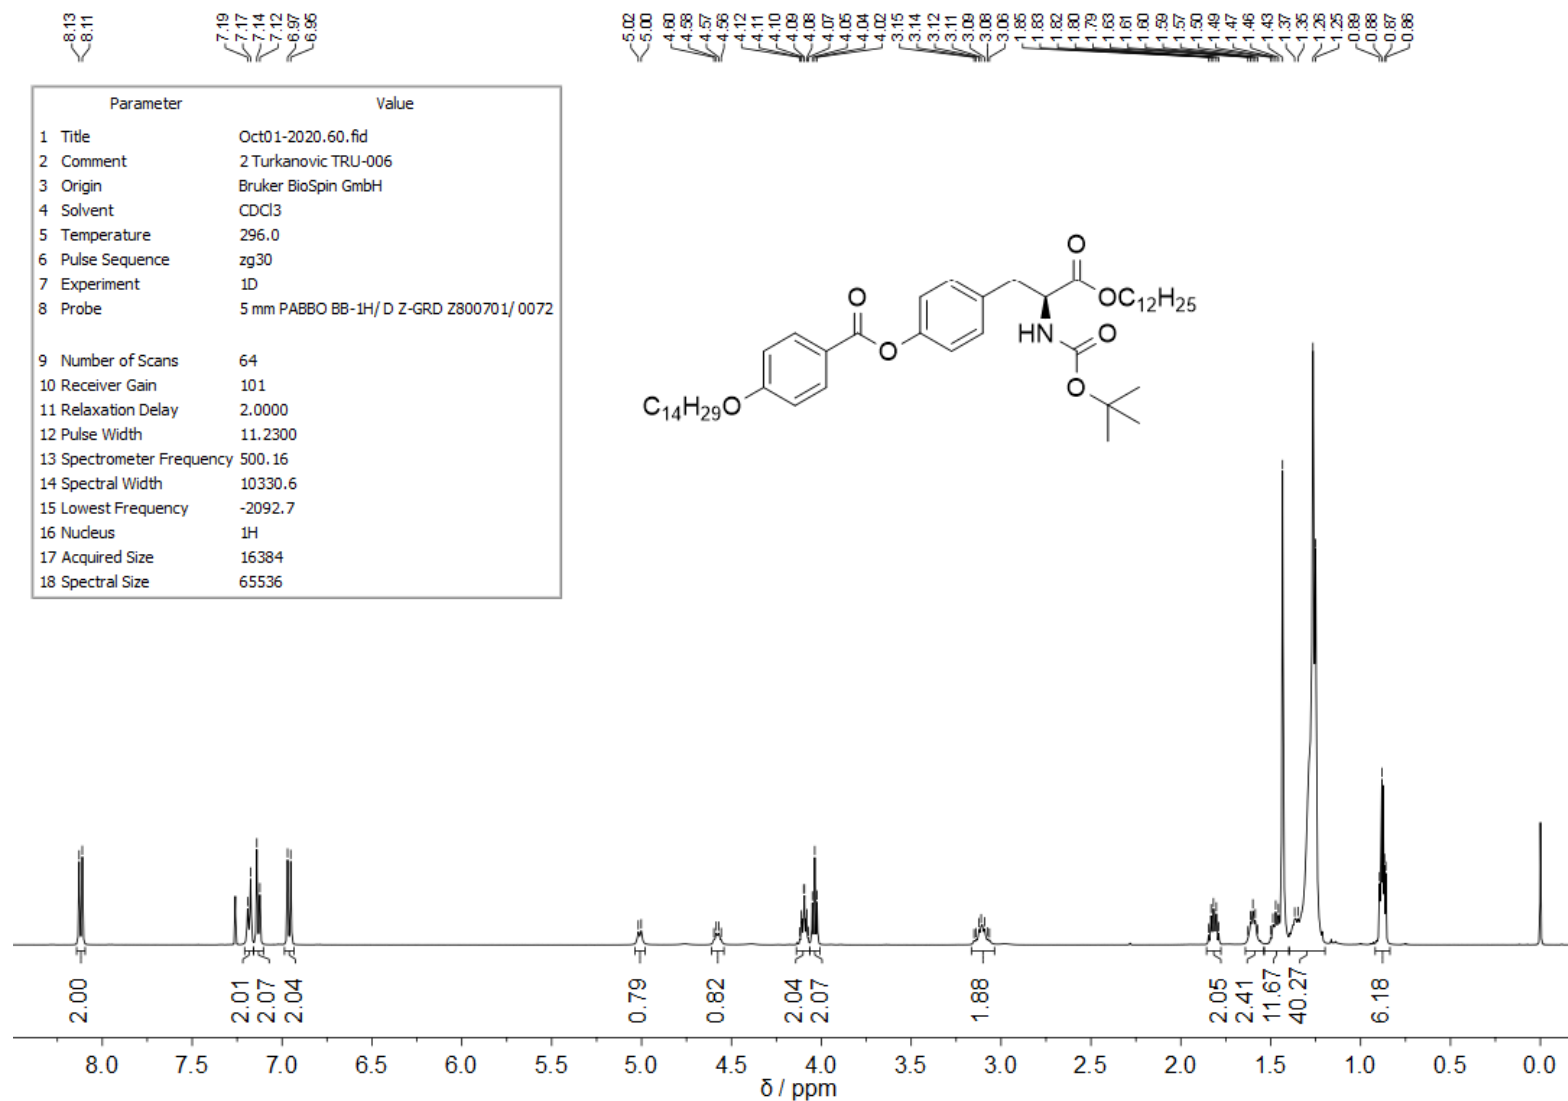

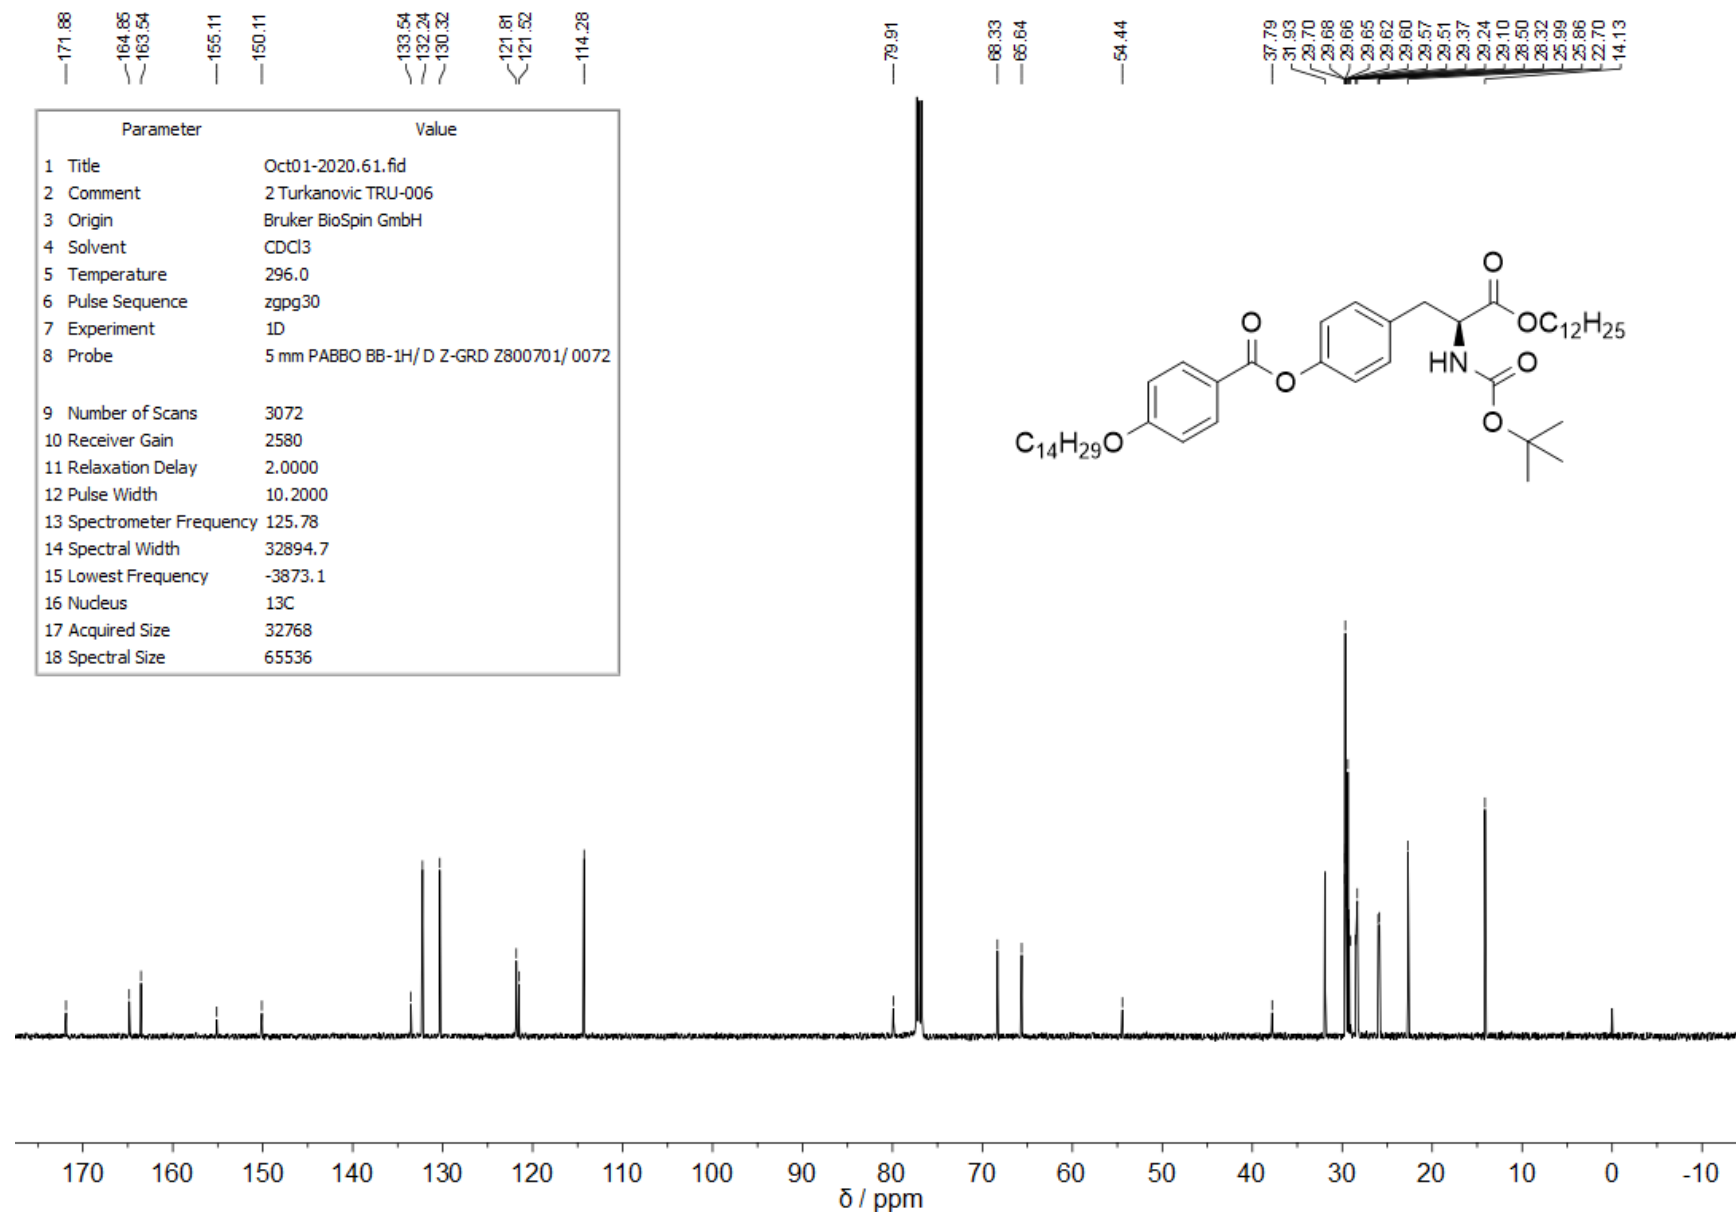

4-C<sub>10</sub>TyrC<sub>14</sub>Boc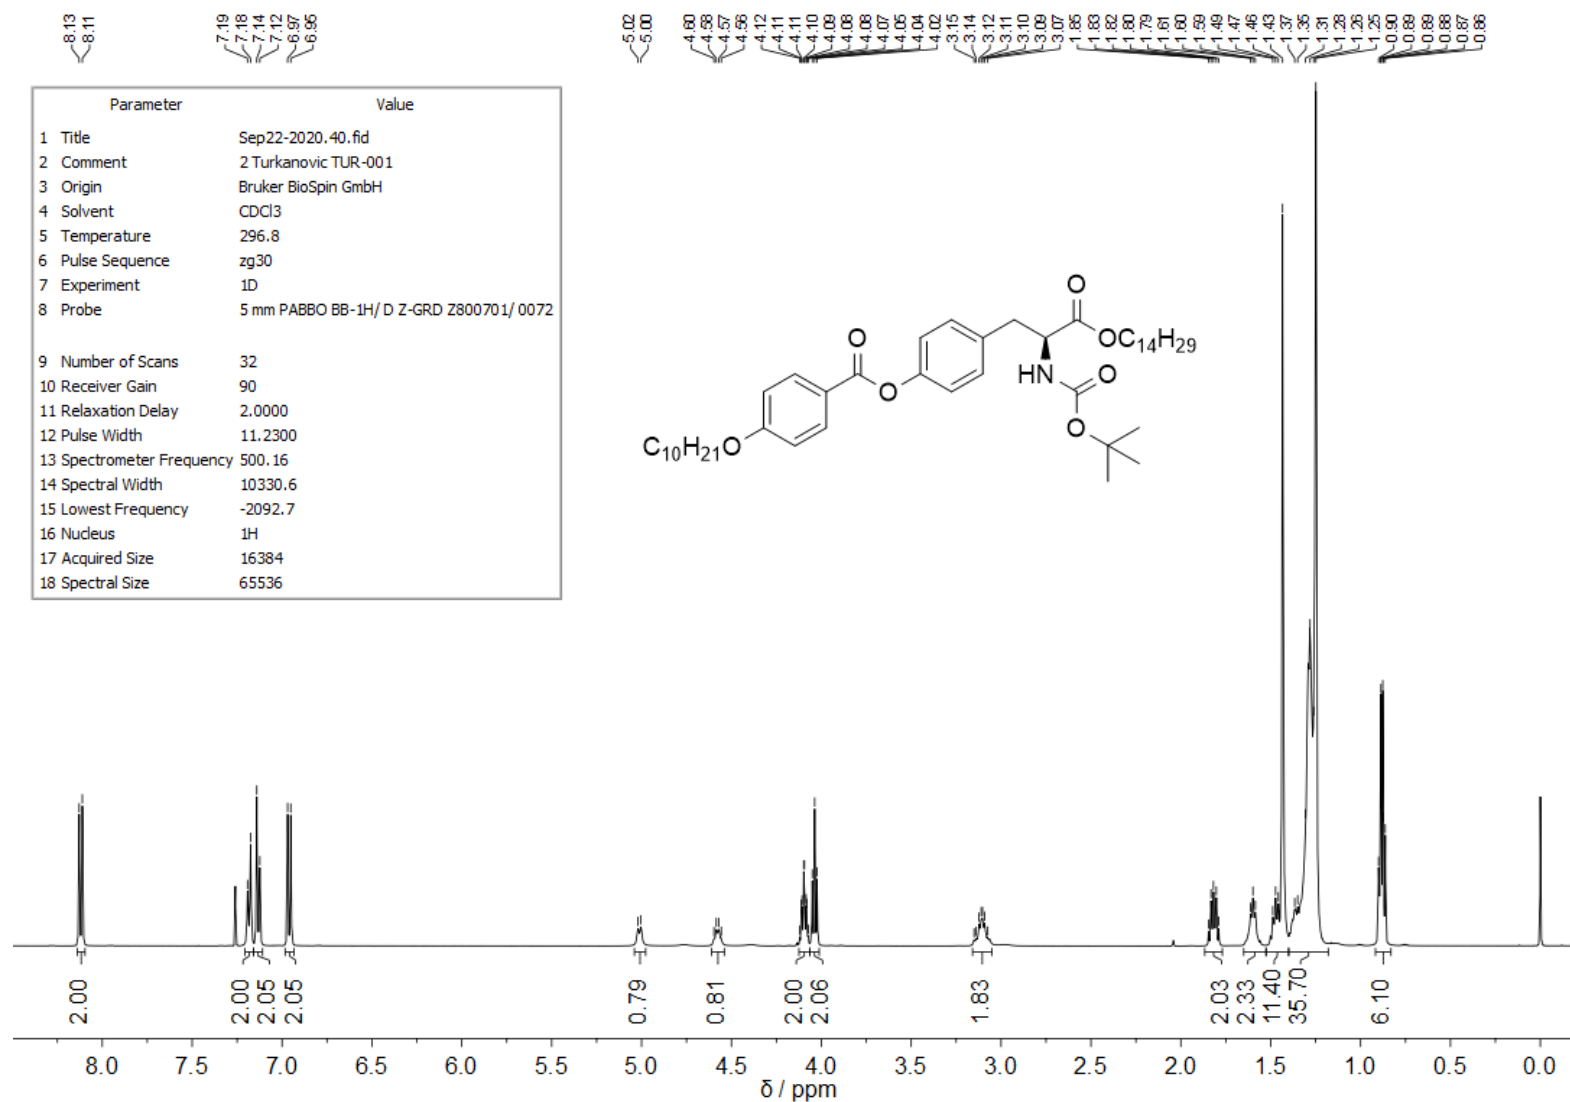

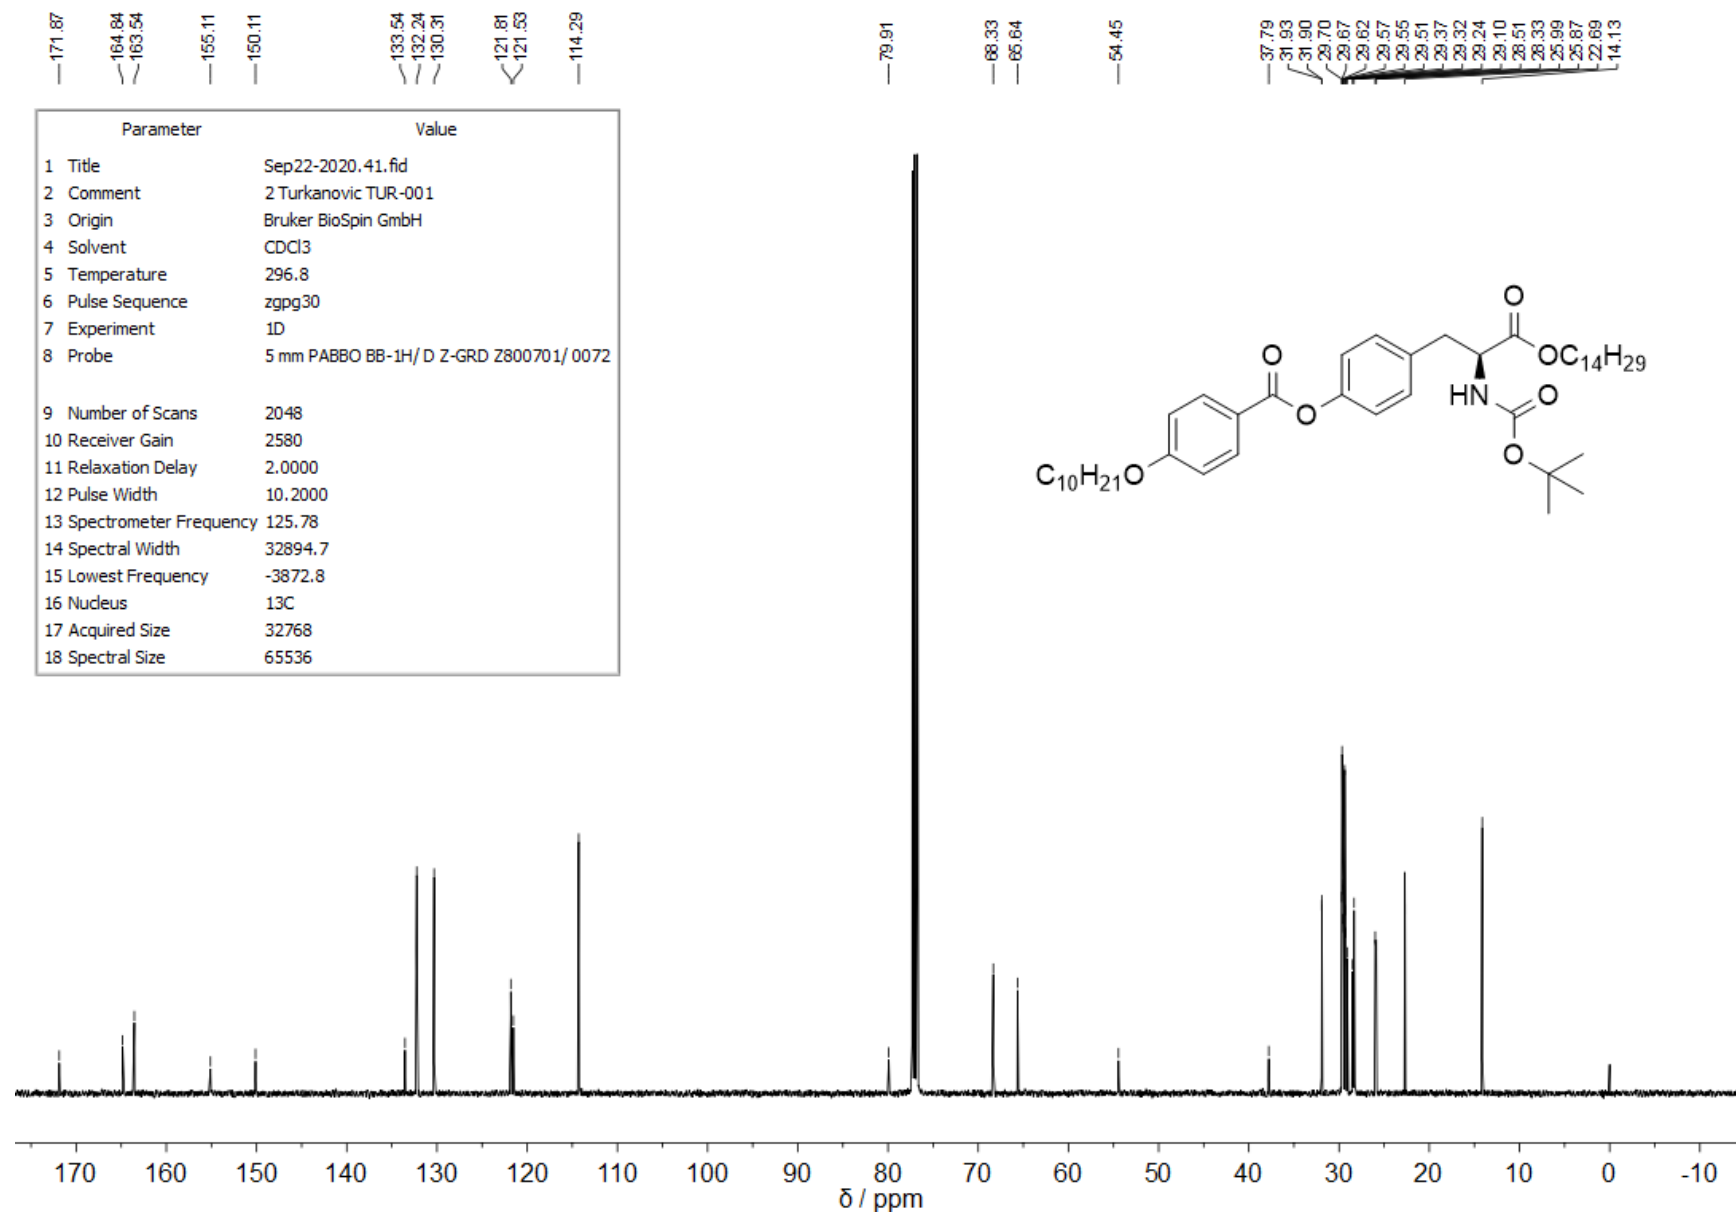

4-C<sub>12</sub>TyrC<sub>14</sub>Boc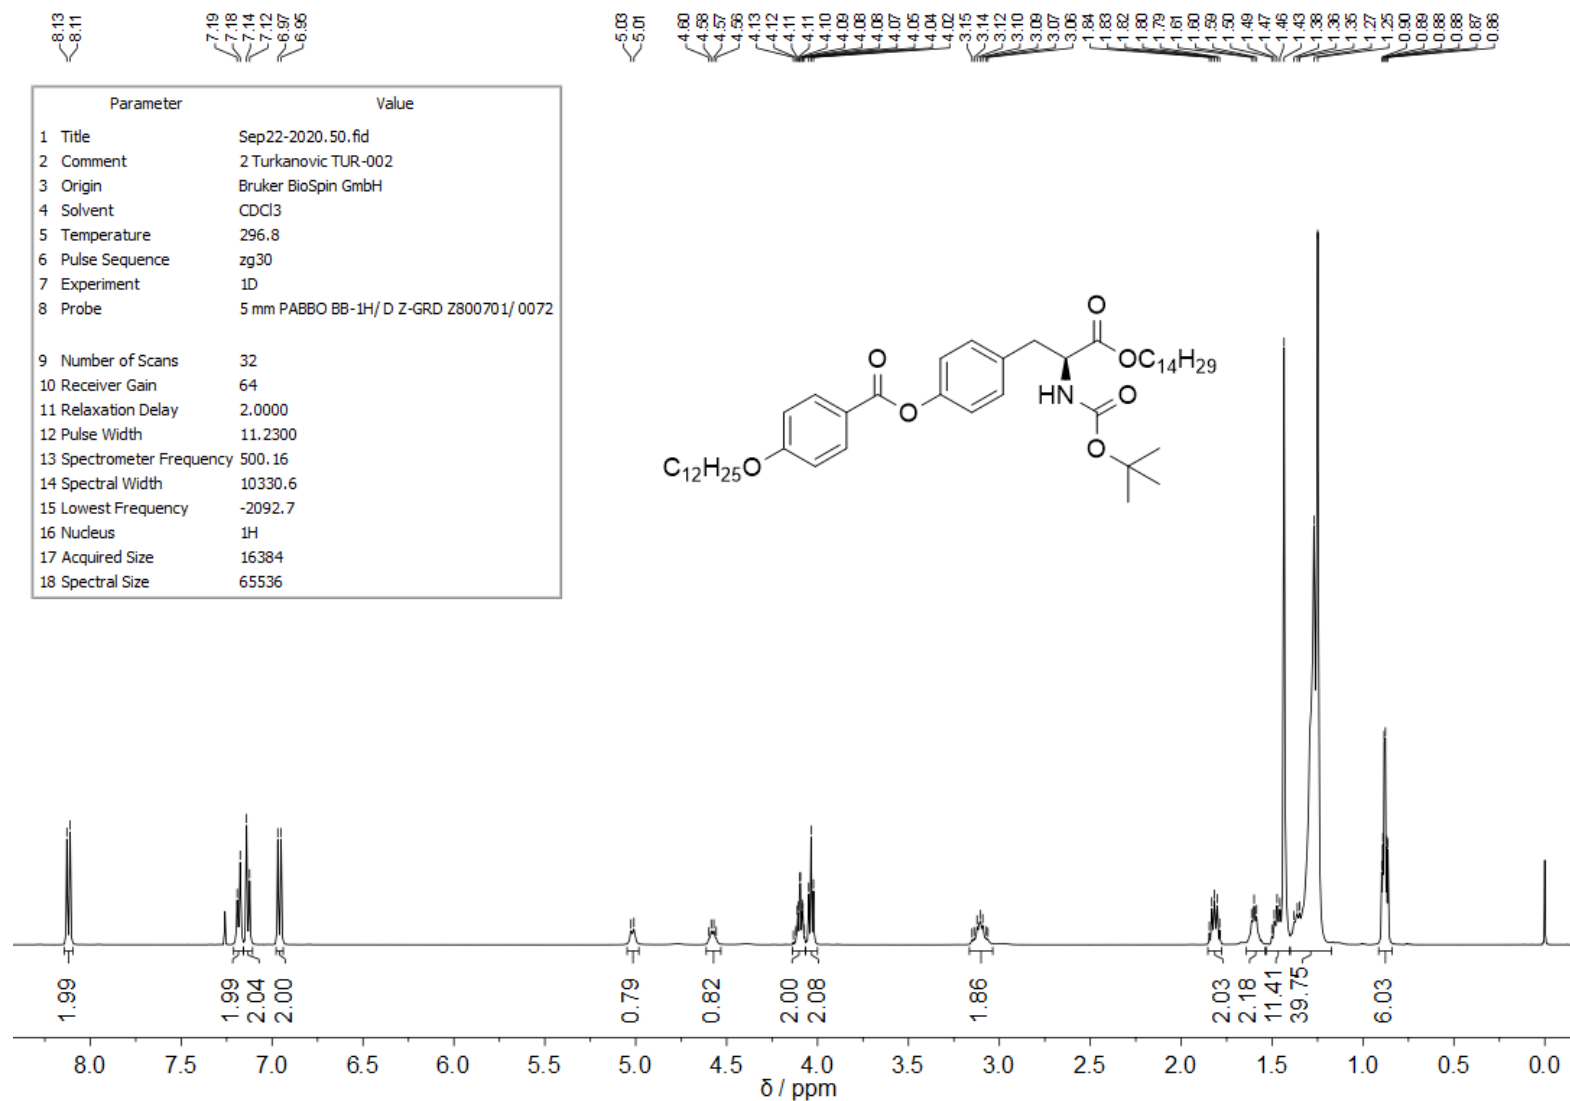

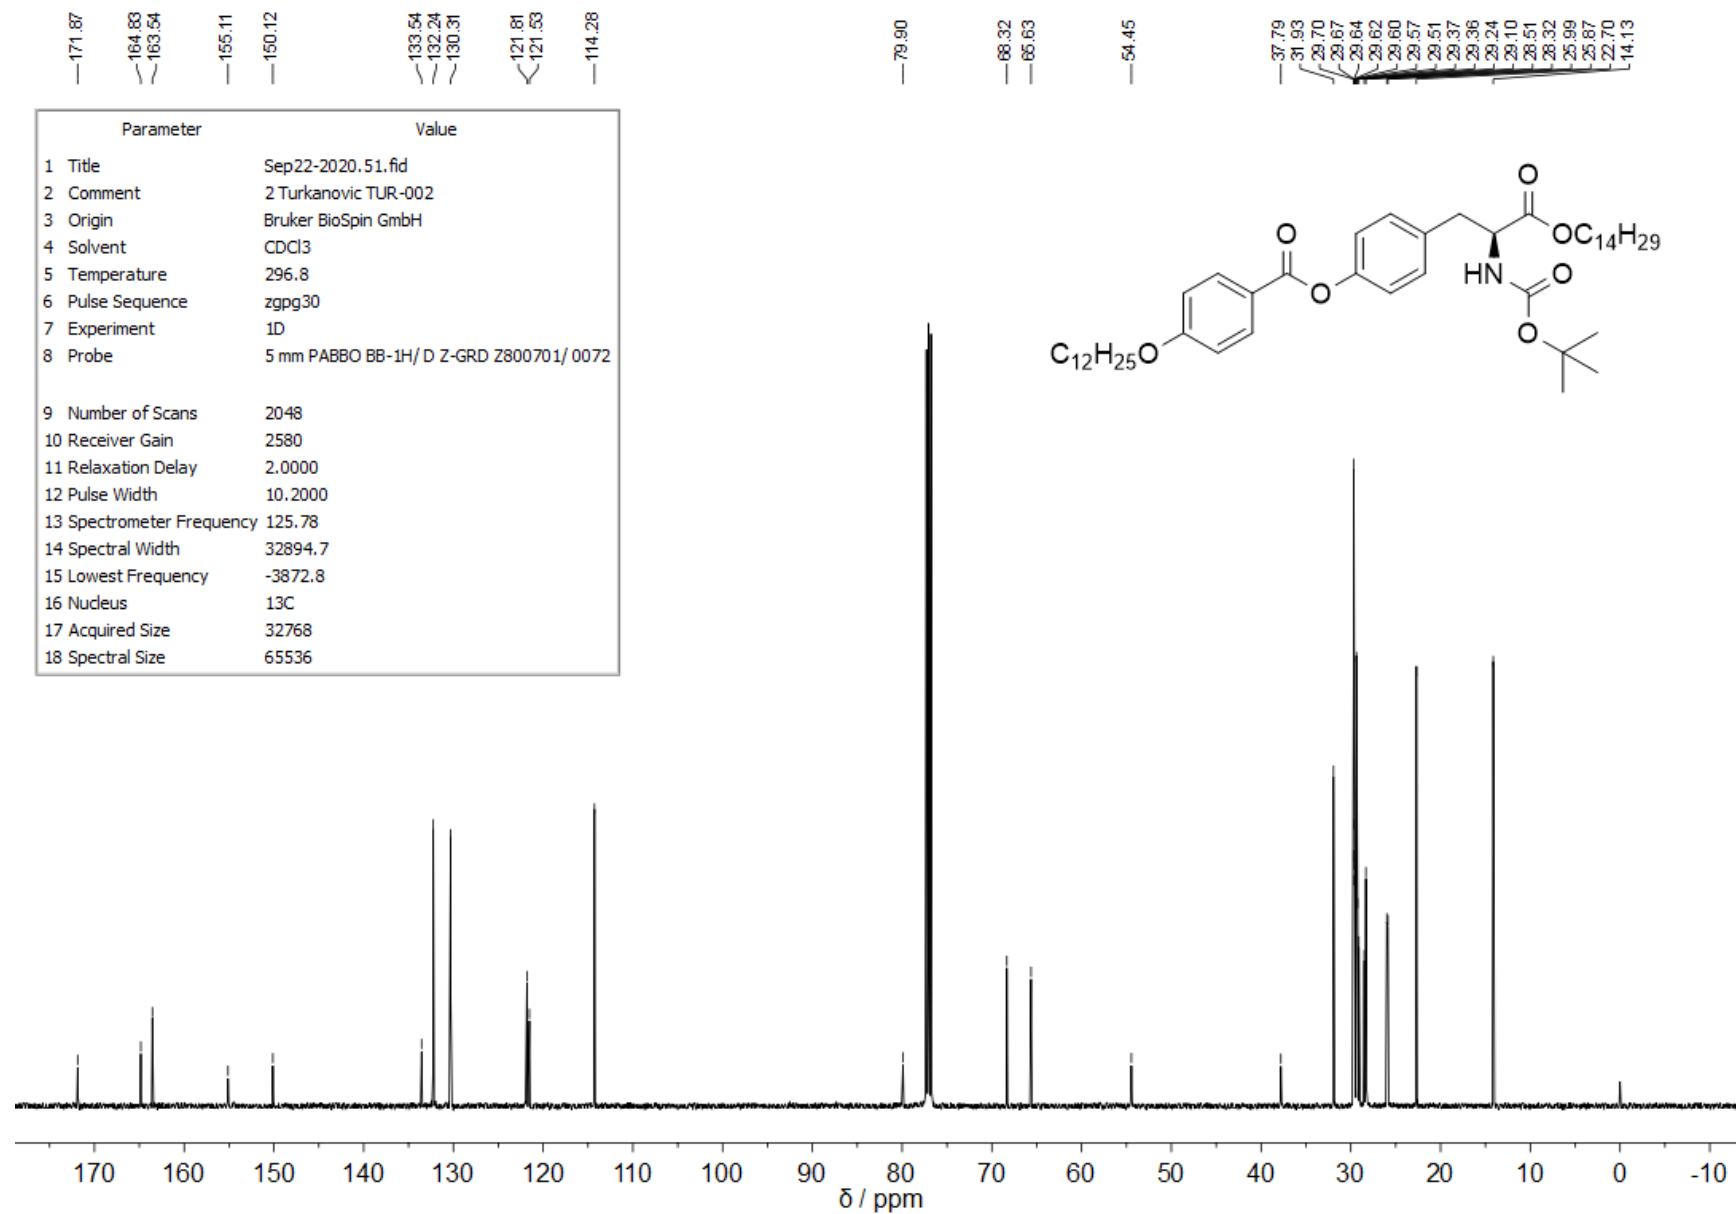

4-C<sub>14</sub>TyrC<sub>14</sub>Boc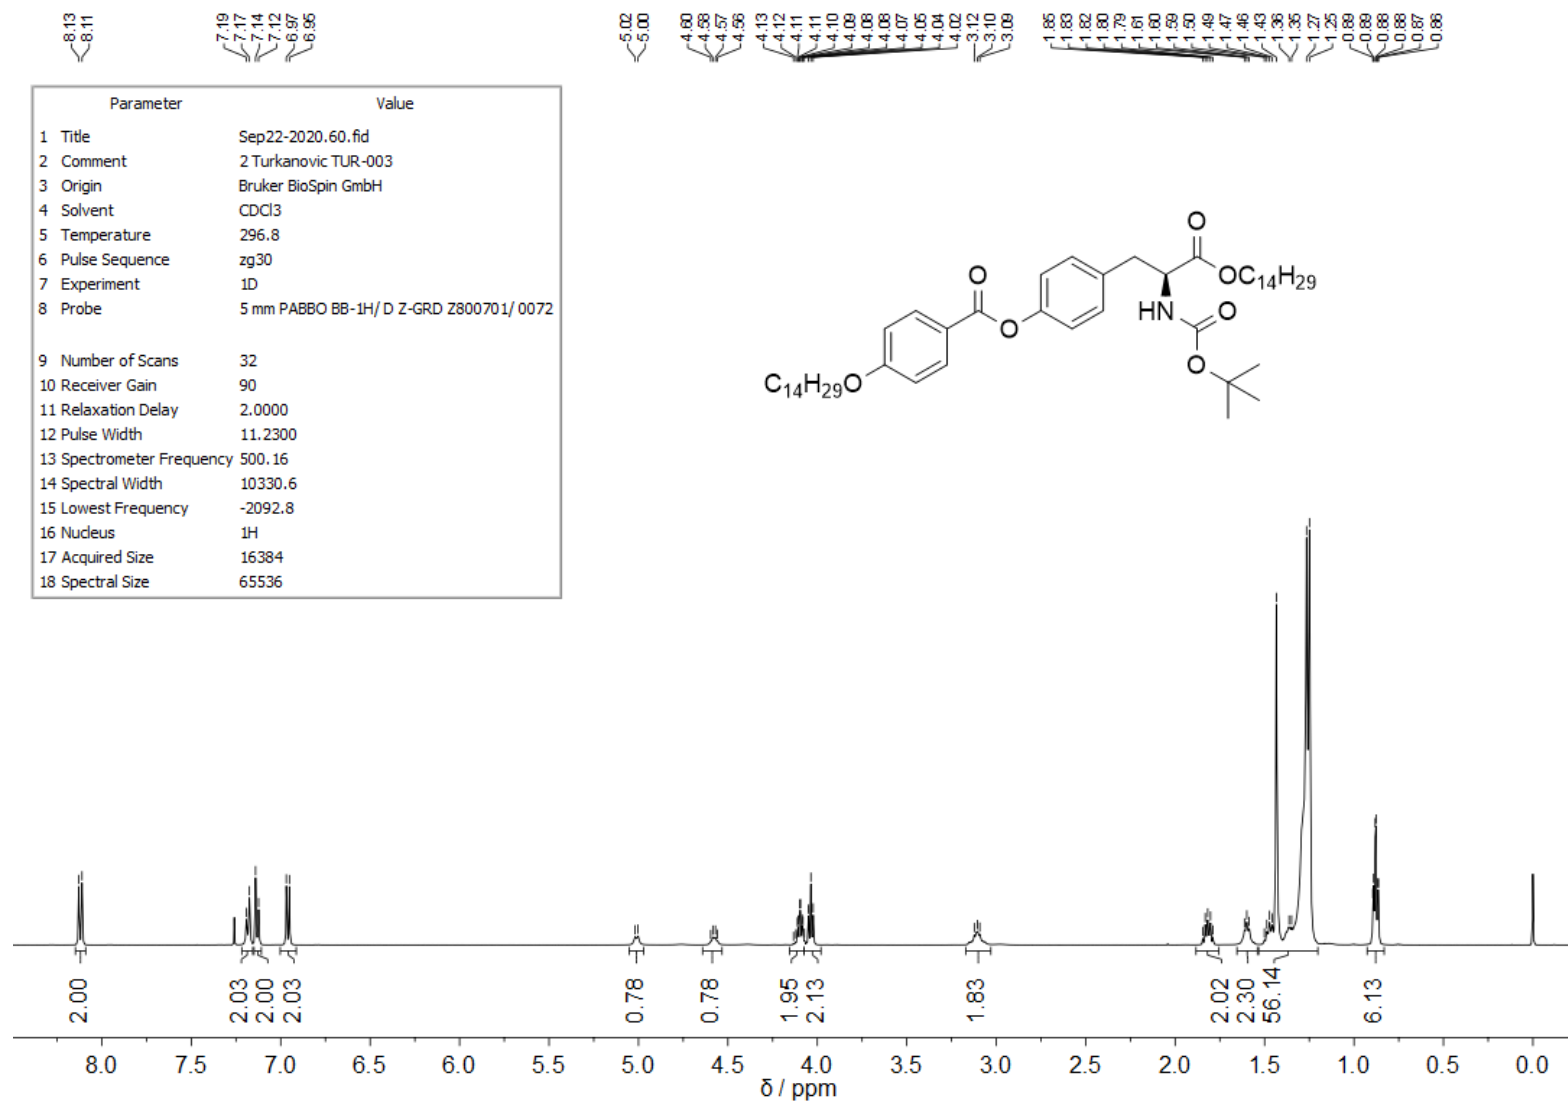



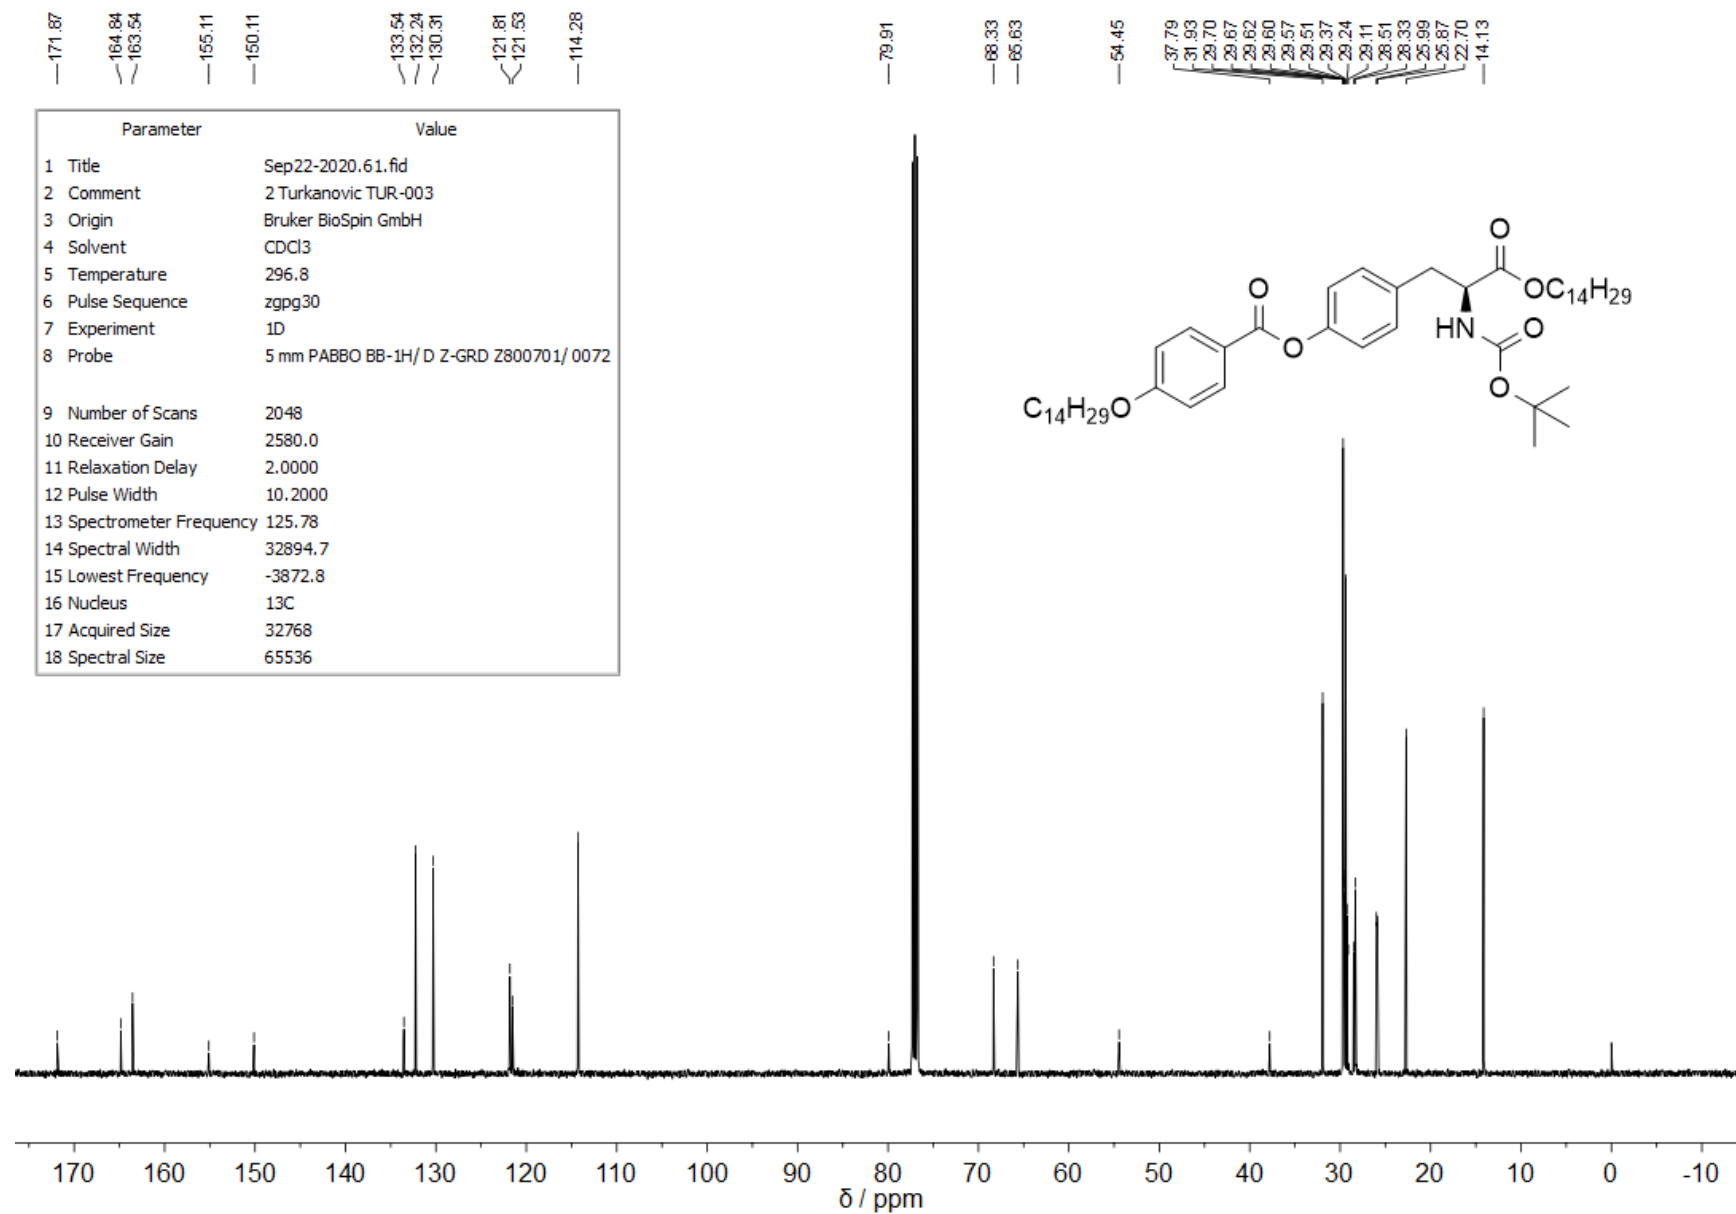

3,4-C<sub>10</sub>TyrC<sub>10</sub>Boc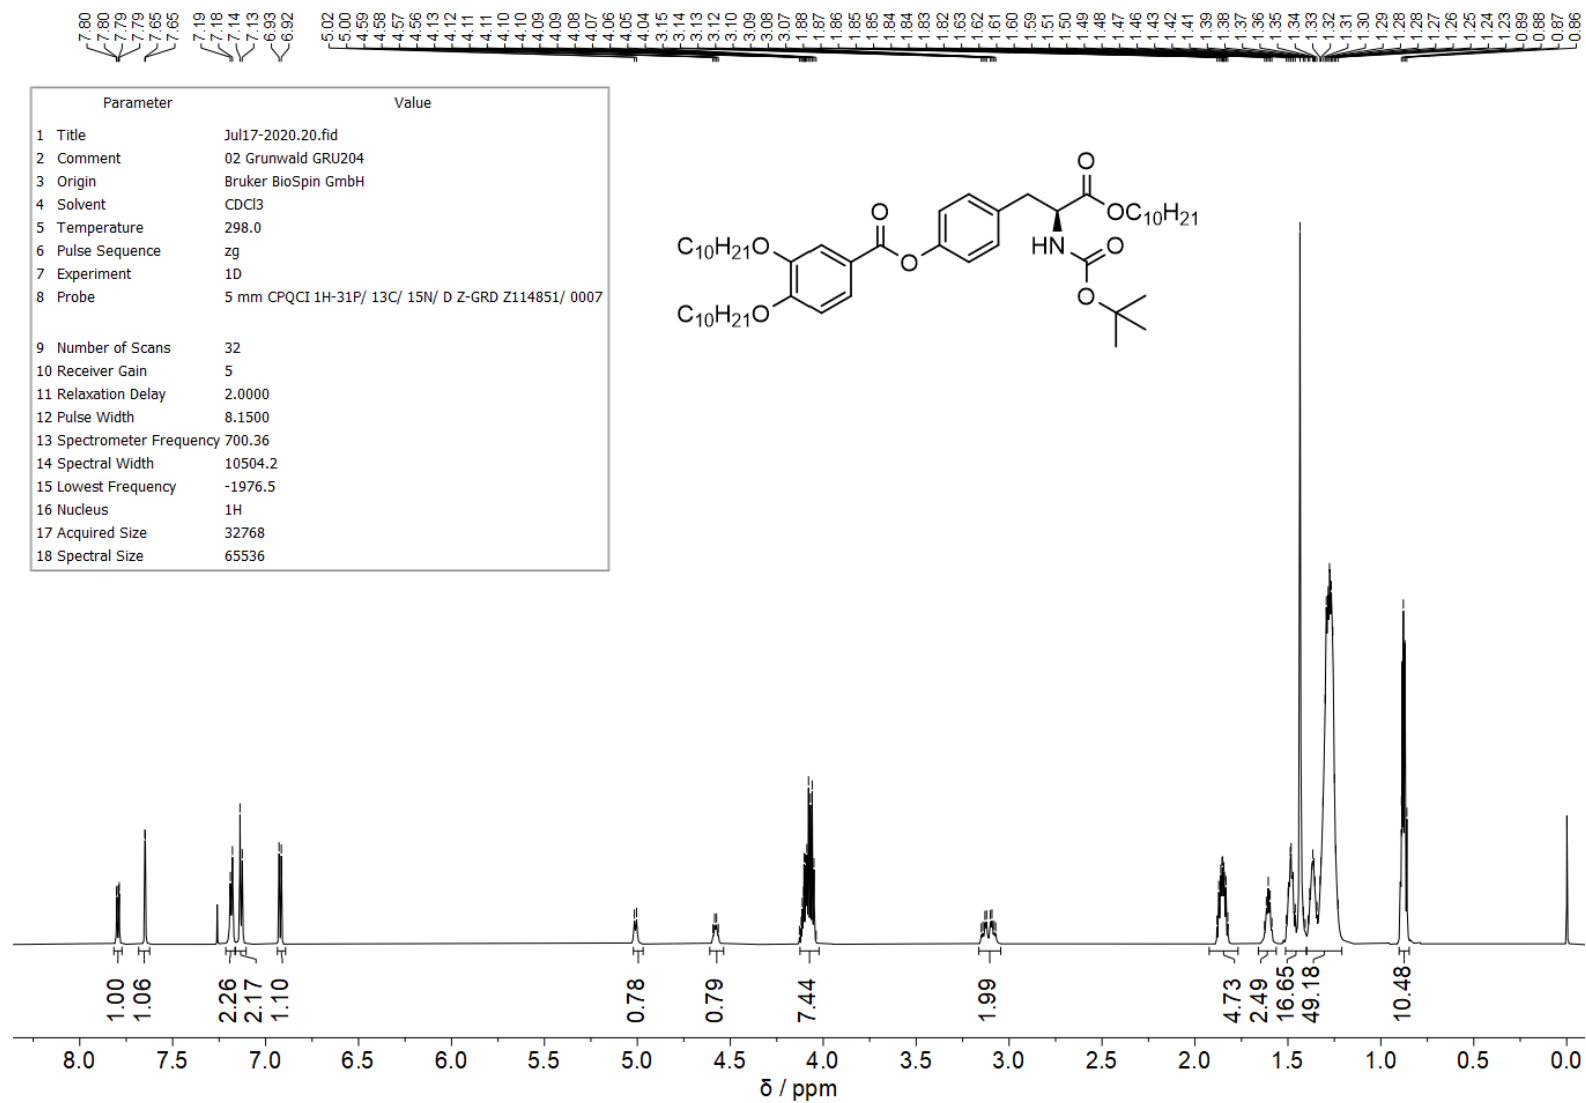

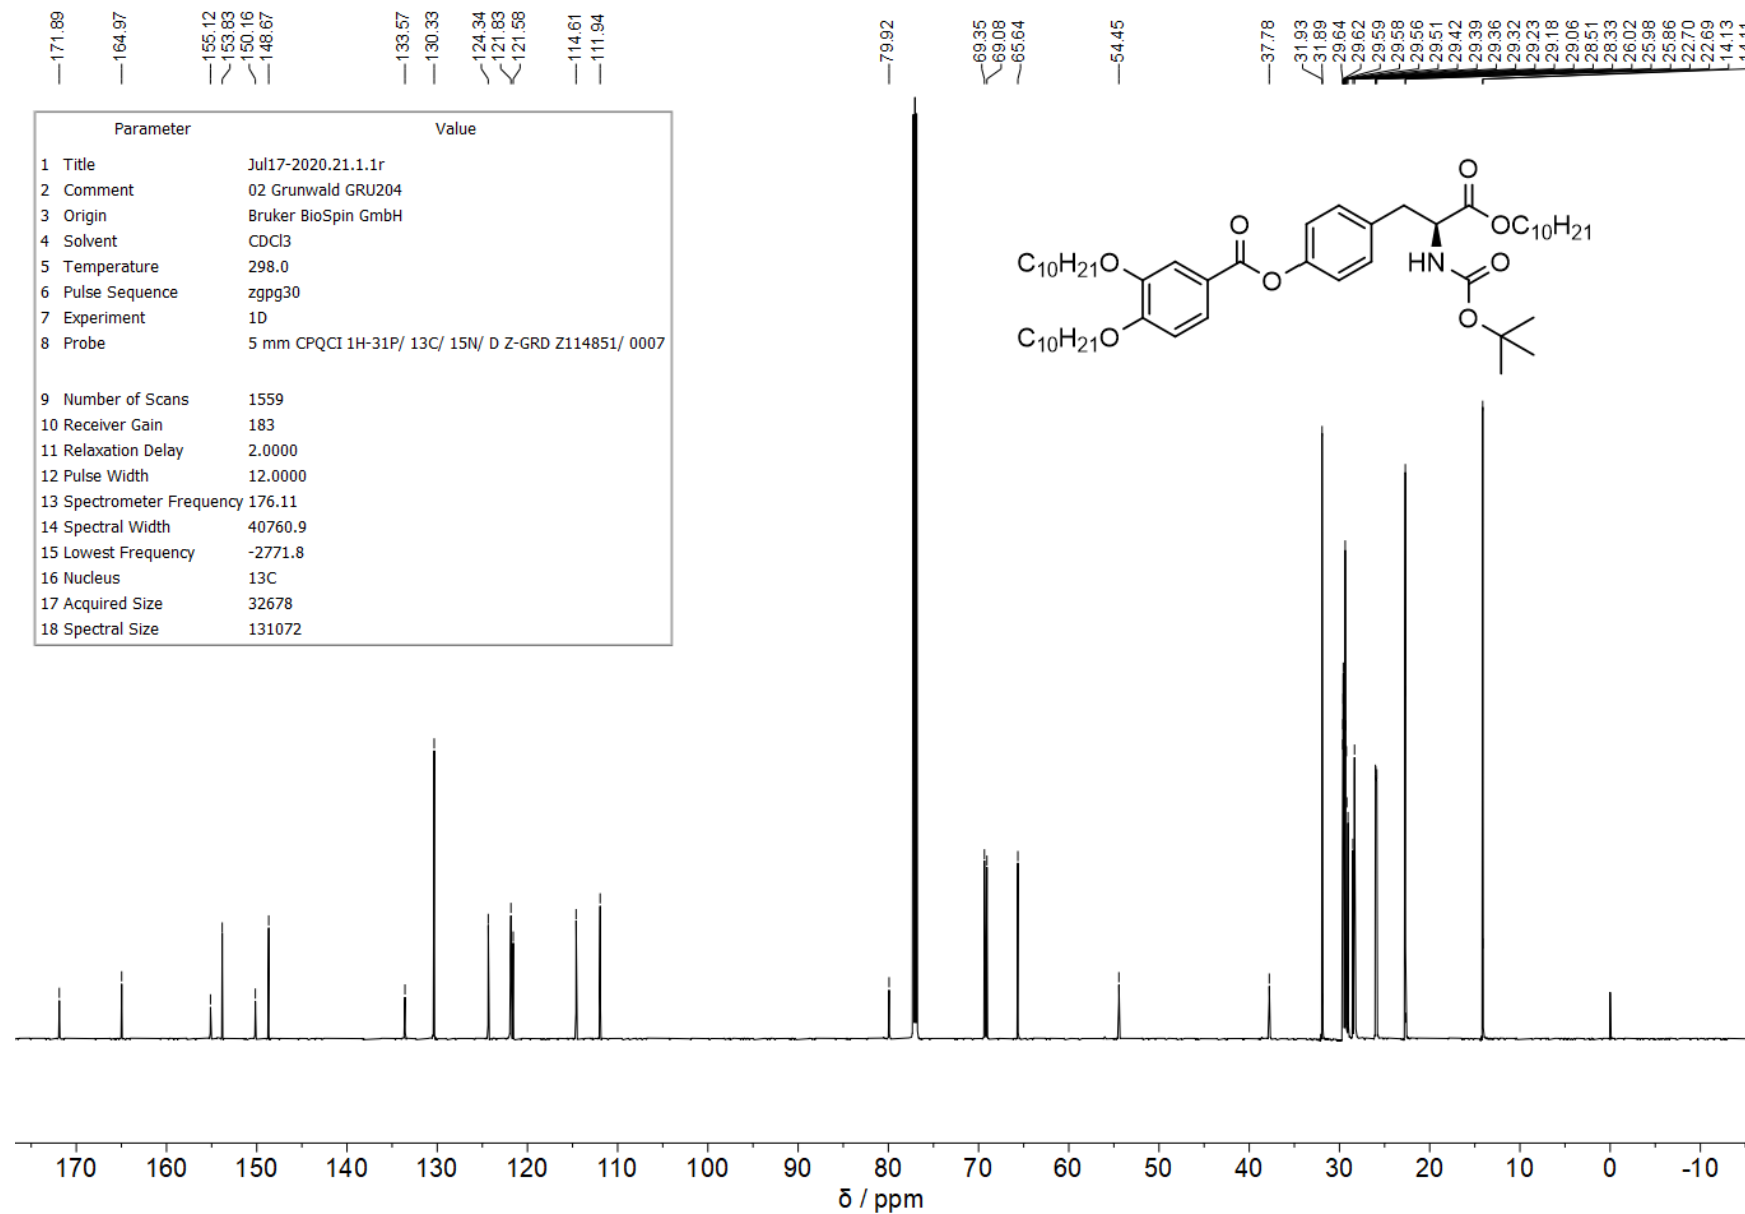

3,4-C<sub>12</sub>TyrC<sub>10</sub>Boc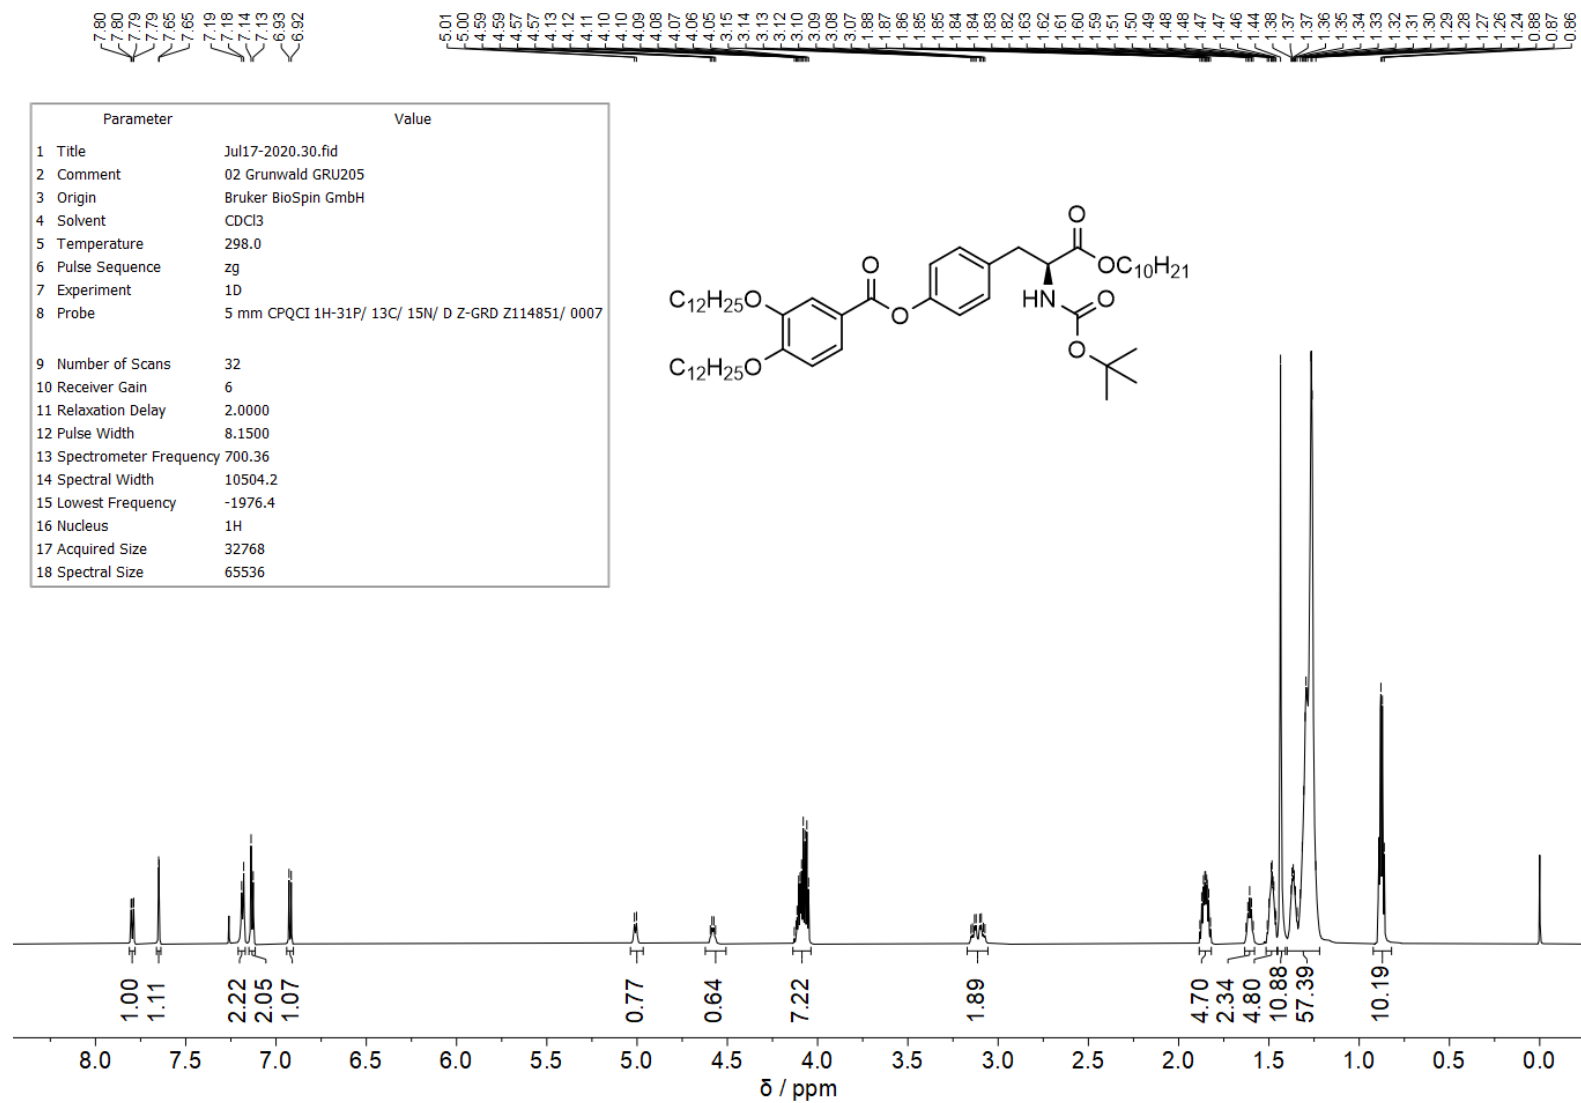

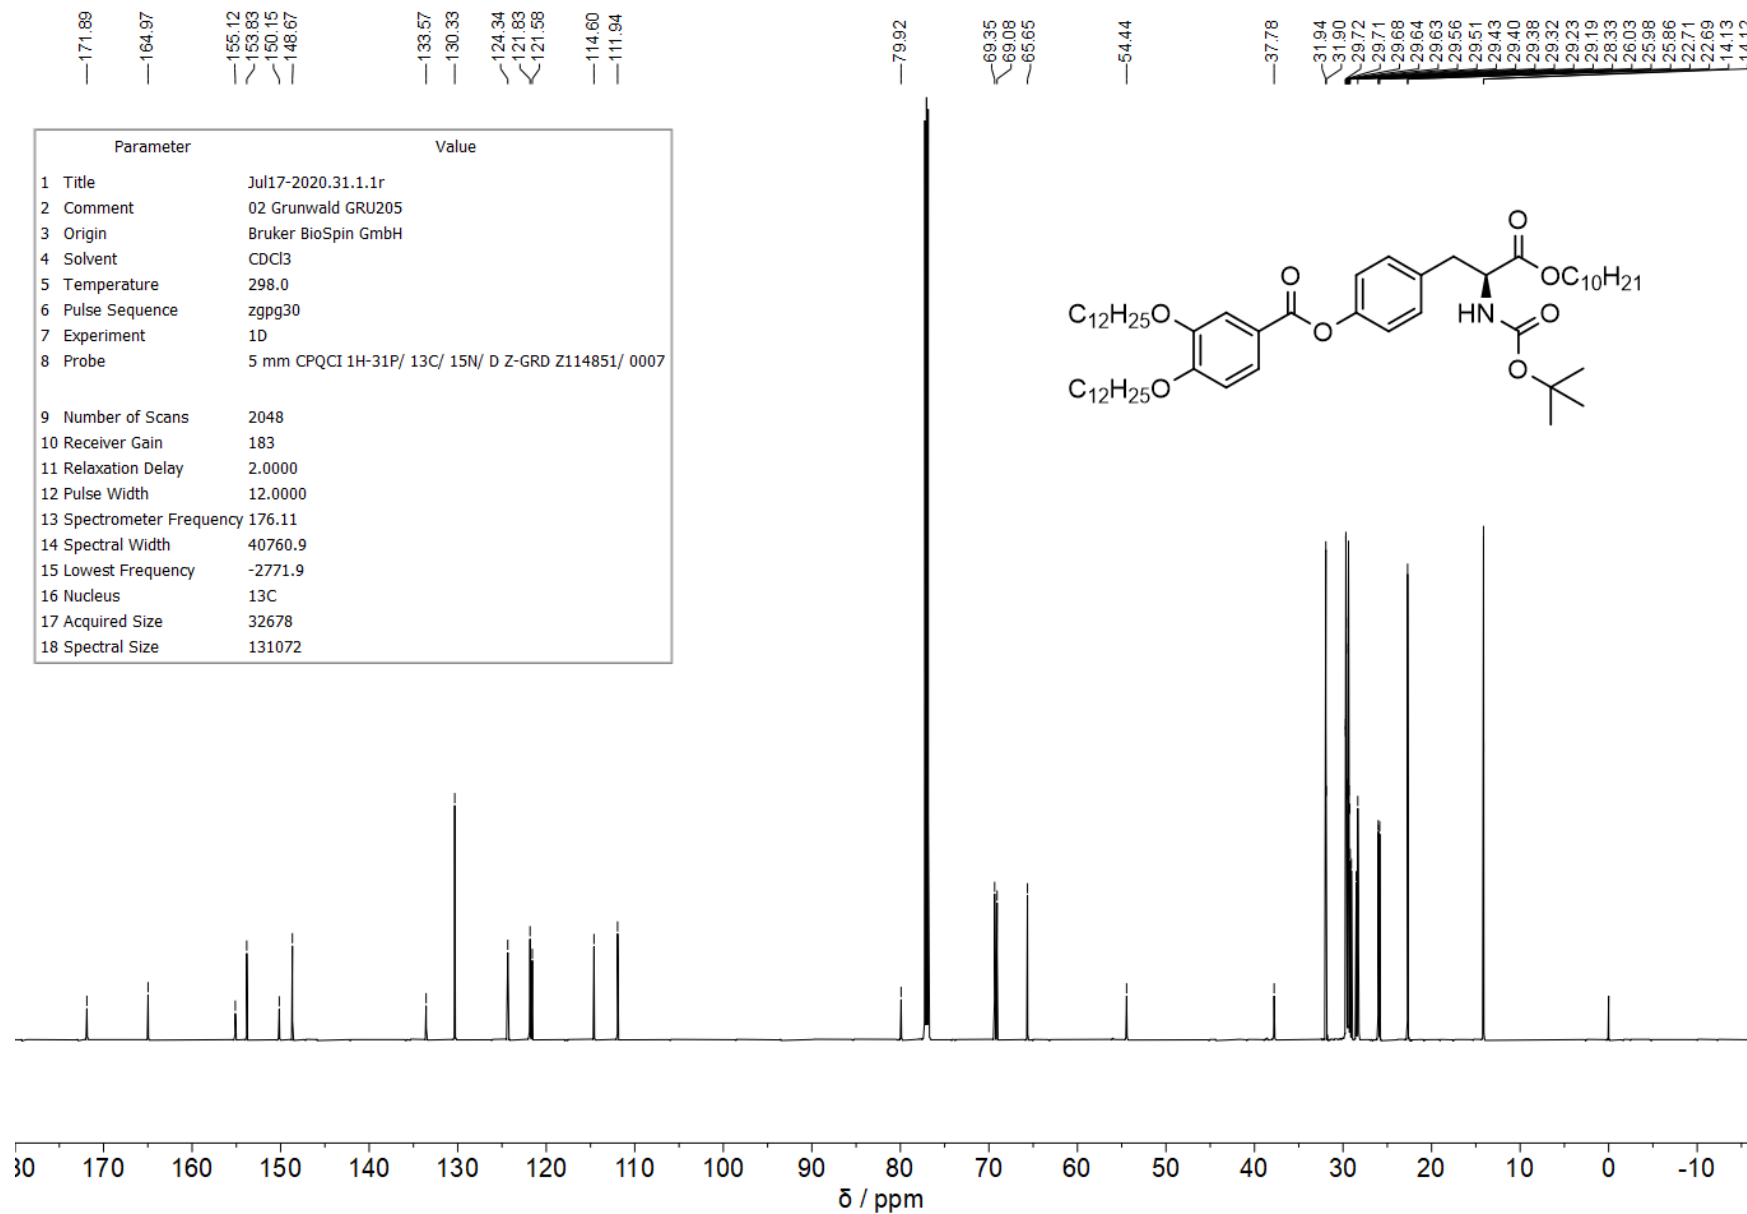

3,4-C<sub>14</sub>TyrC<sub>10</sub>Boc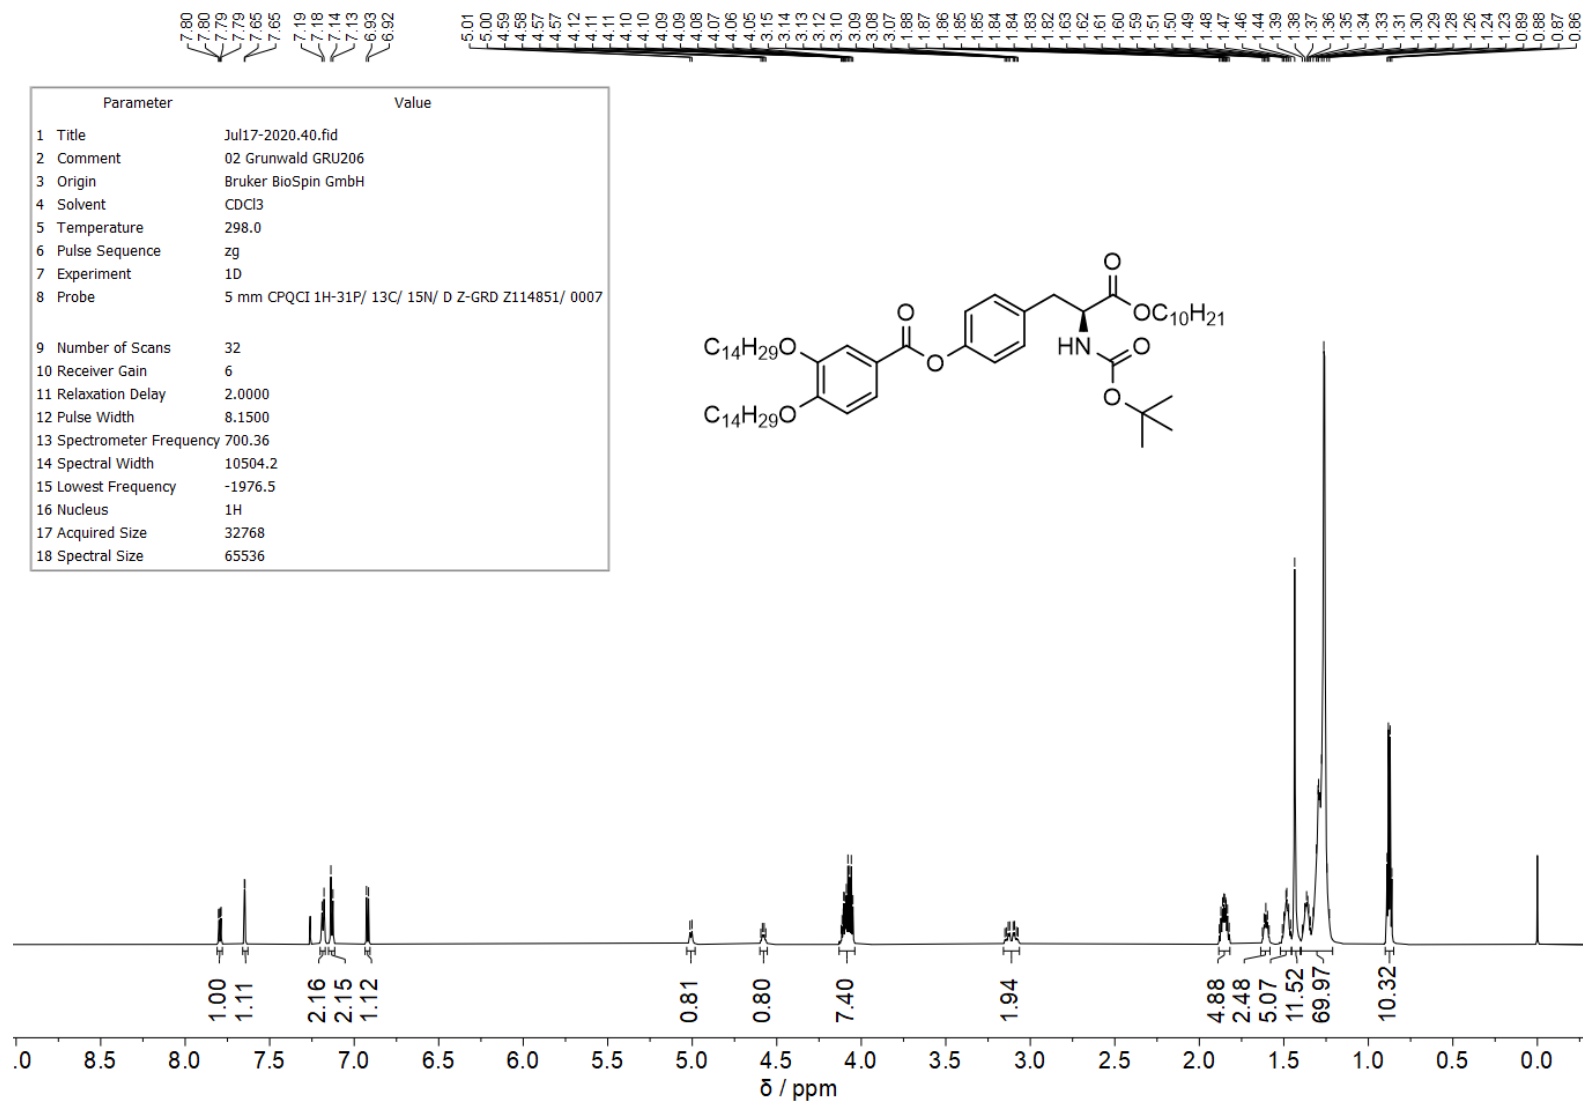

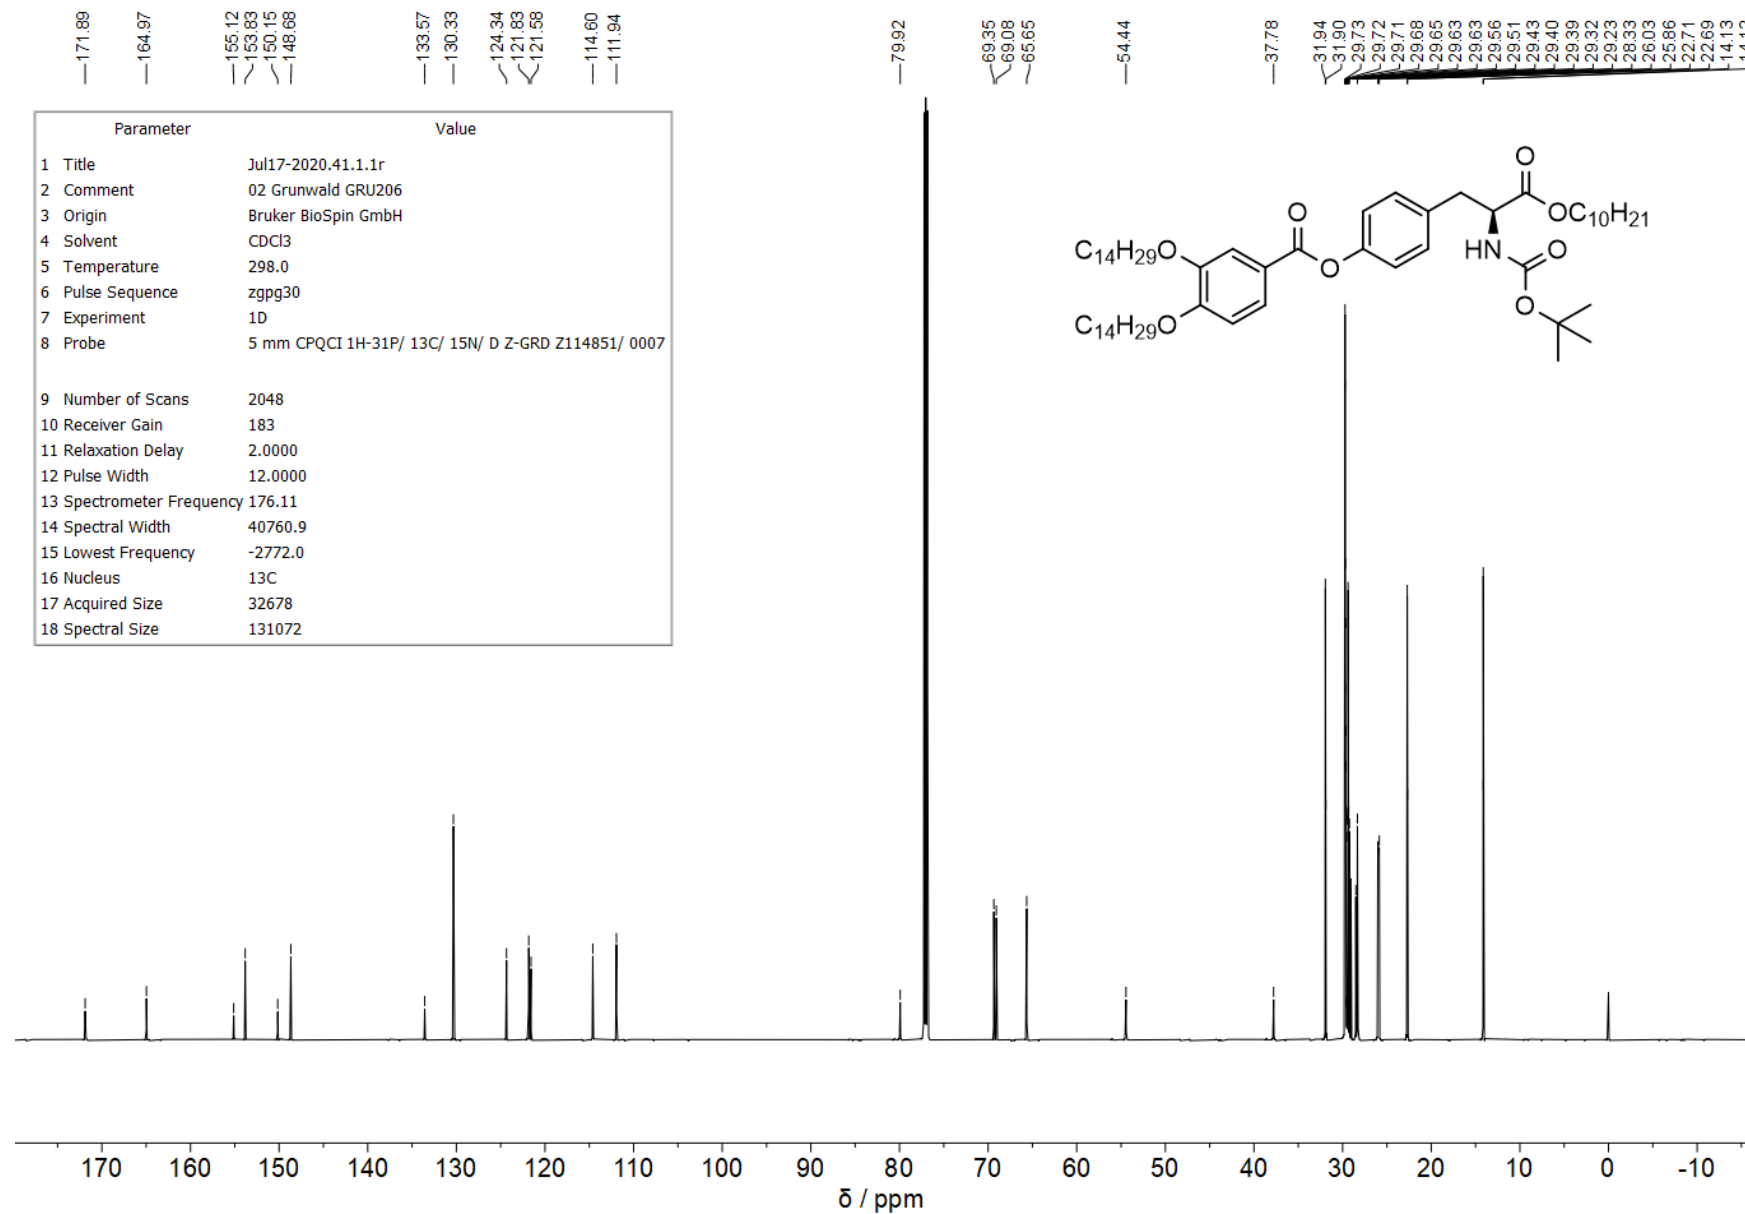

3,4-C<sub>10</sub>TyrC<sub>12</sub>Boc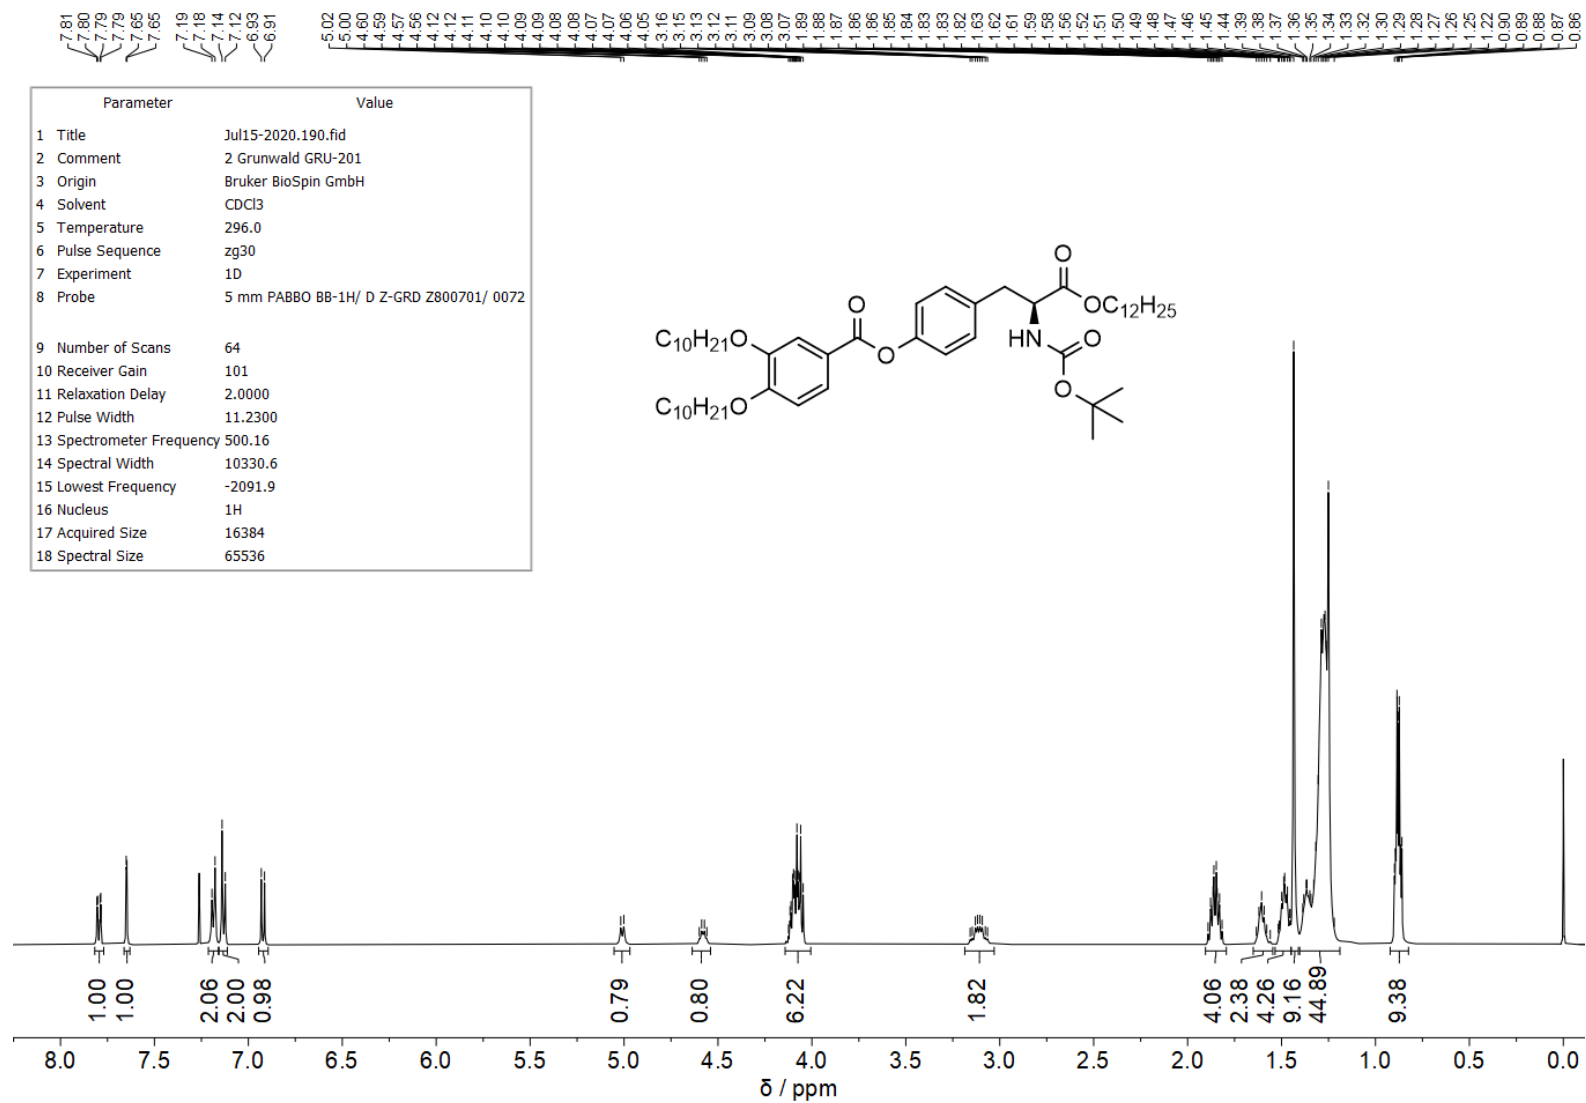



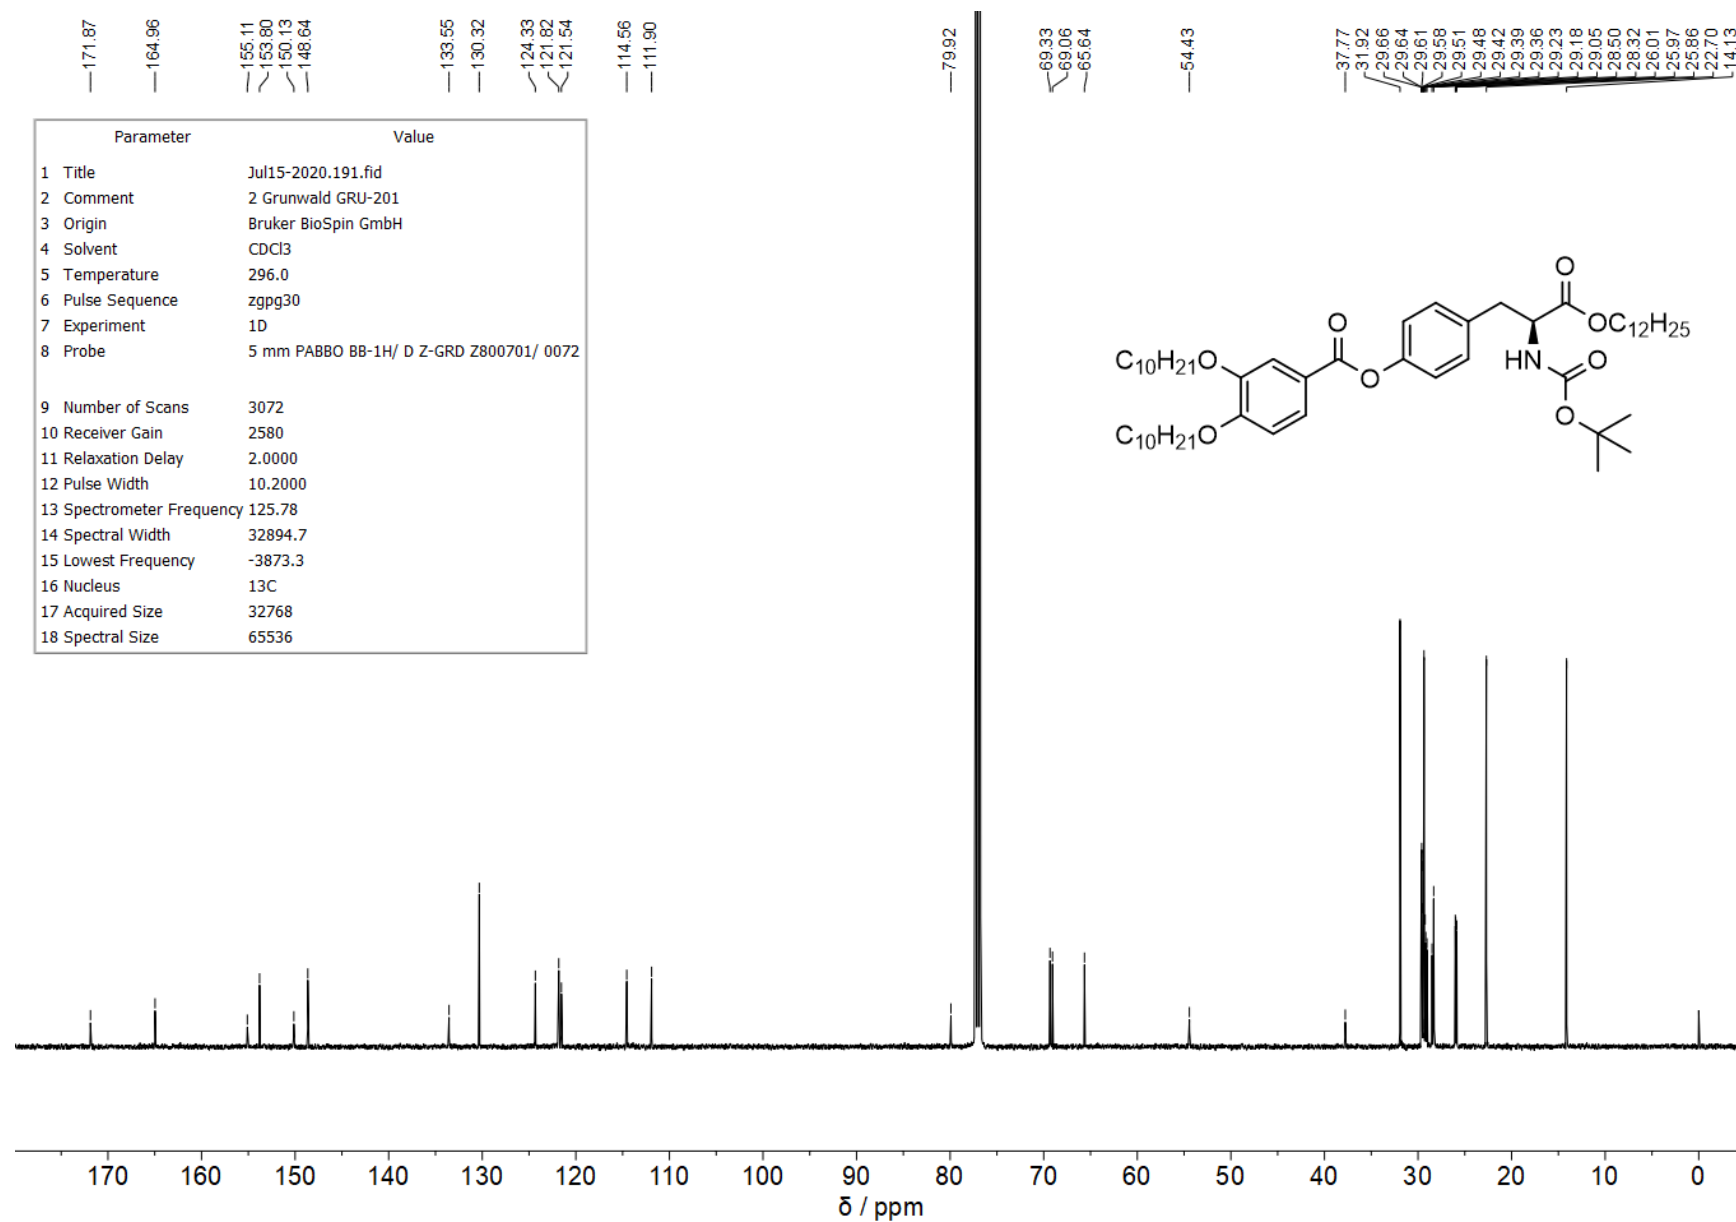

3,4-C<sub>12</sub>TyrC<sub>12</sub>Boc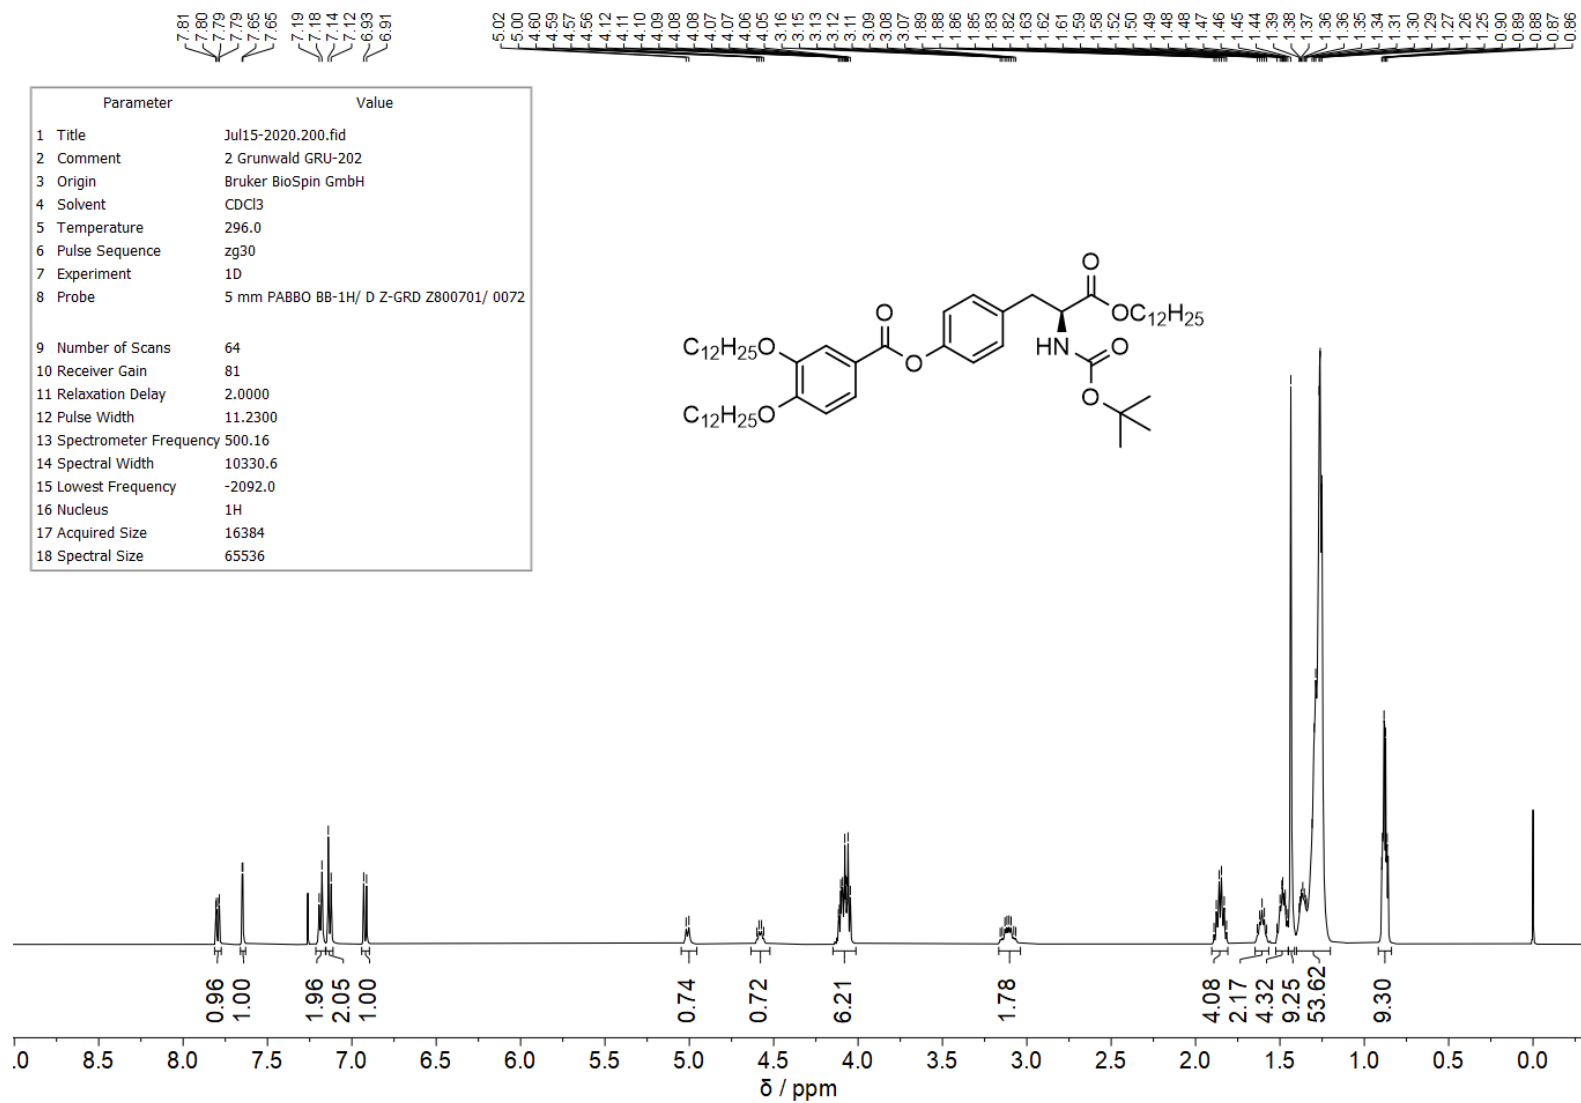

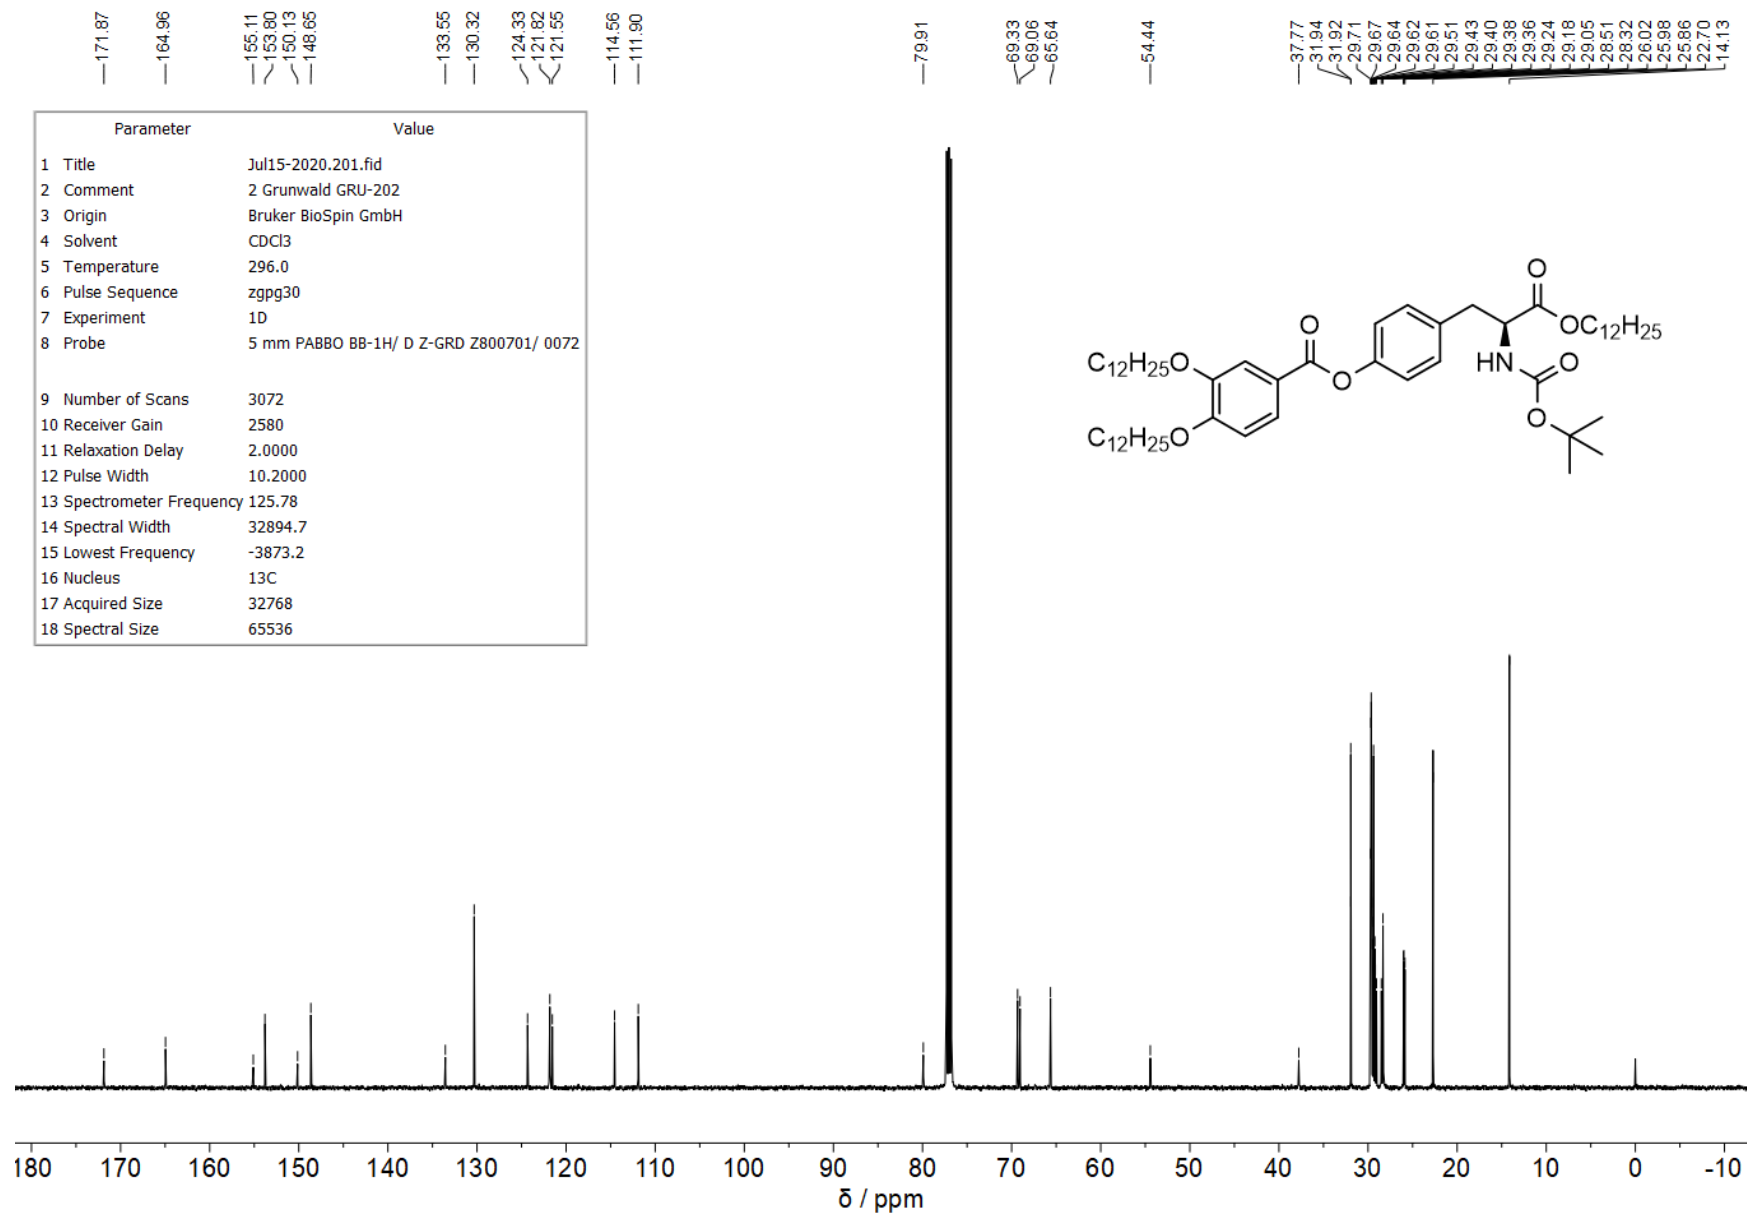

3,4-C<sub>14</sub>TyrC<sub>12</sub>Boc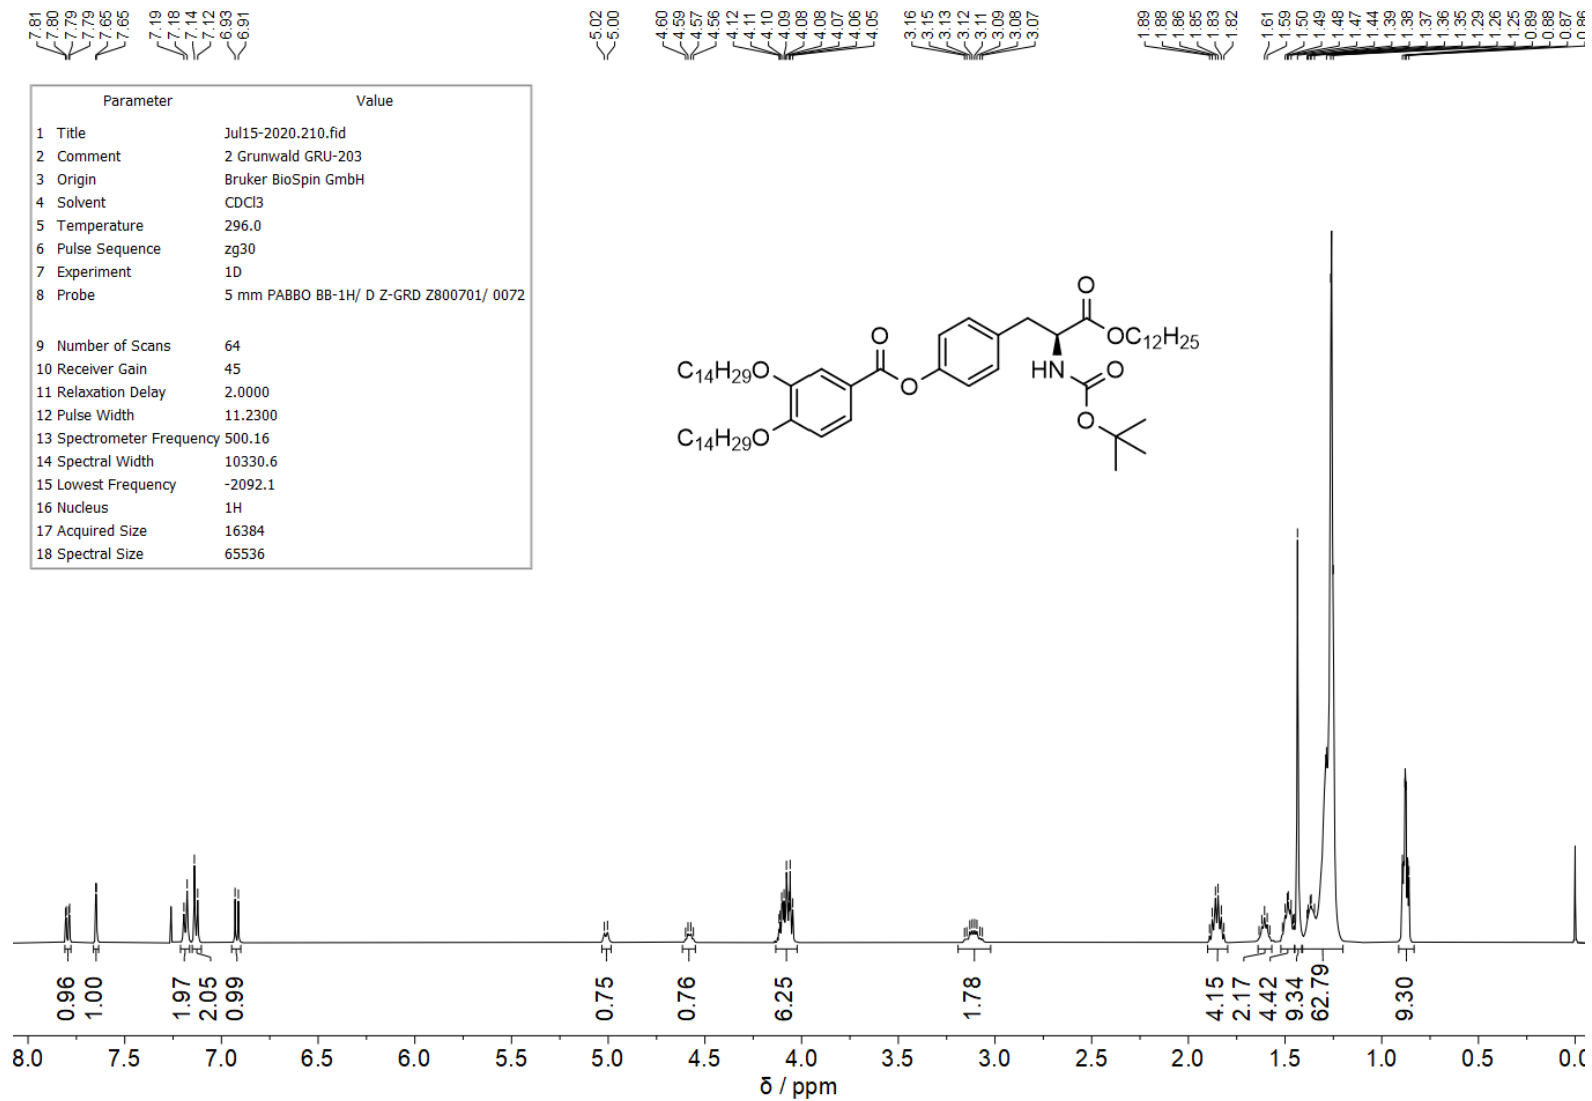

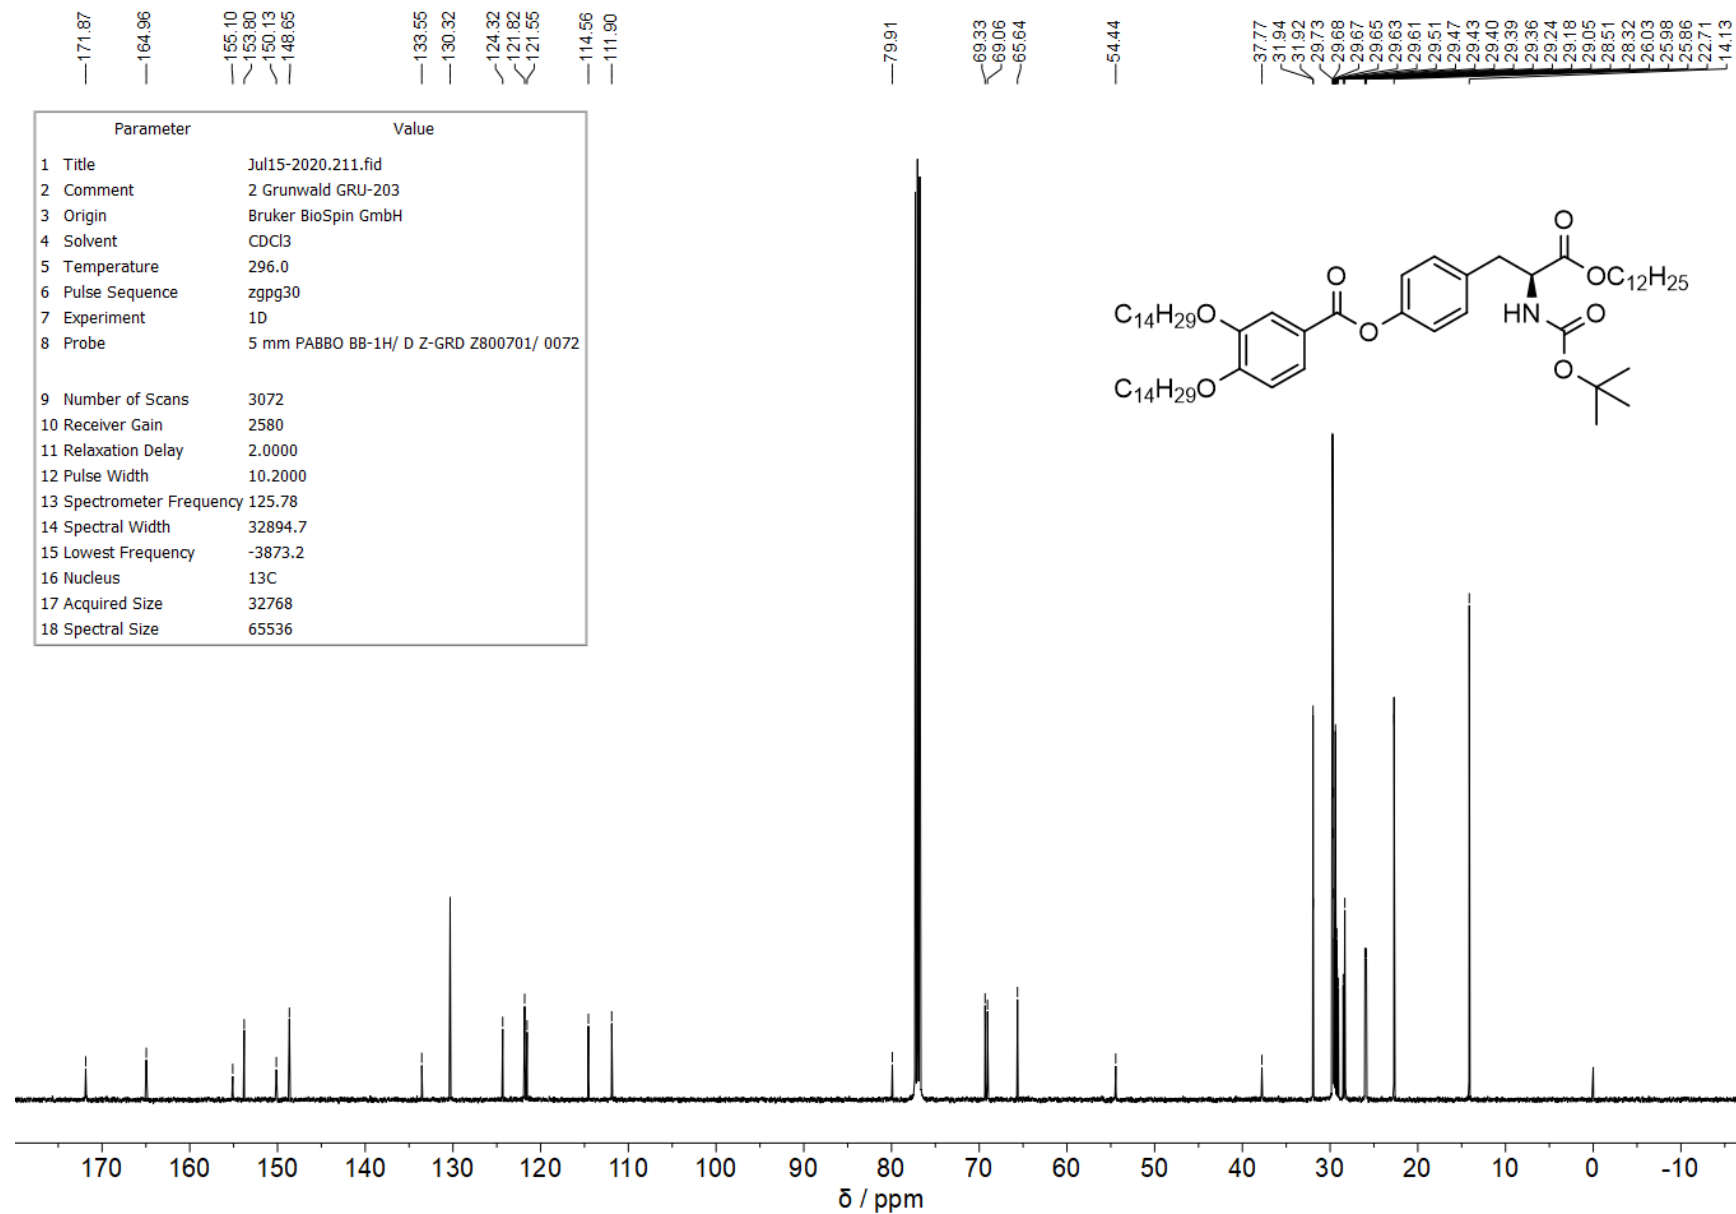

3,4-C<sub>10</sub>TyrC<sub>14</sub>Boc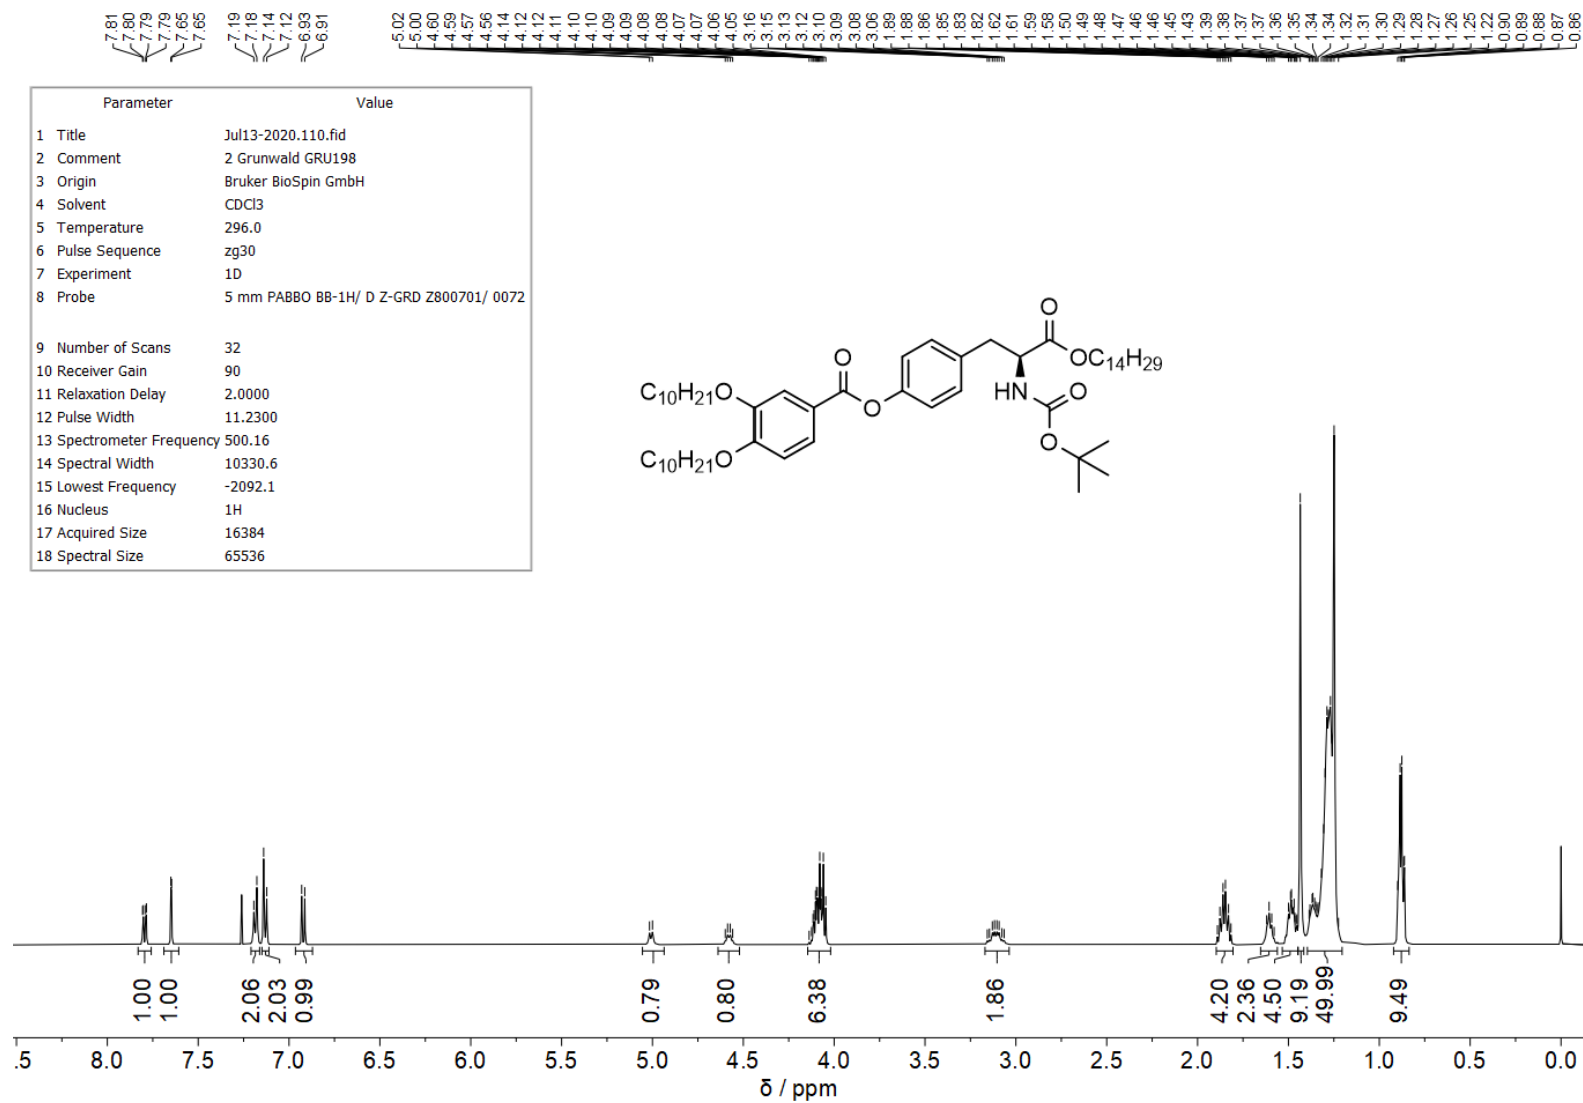

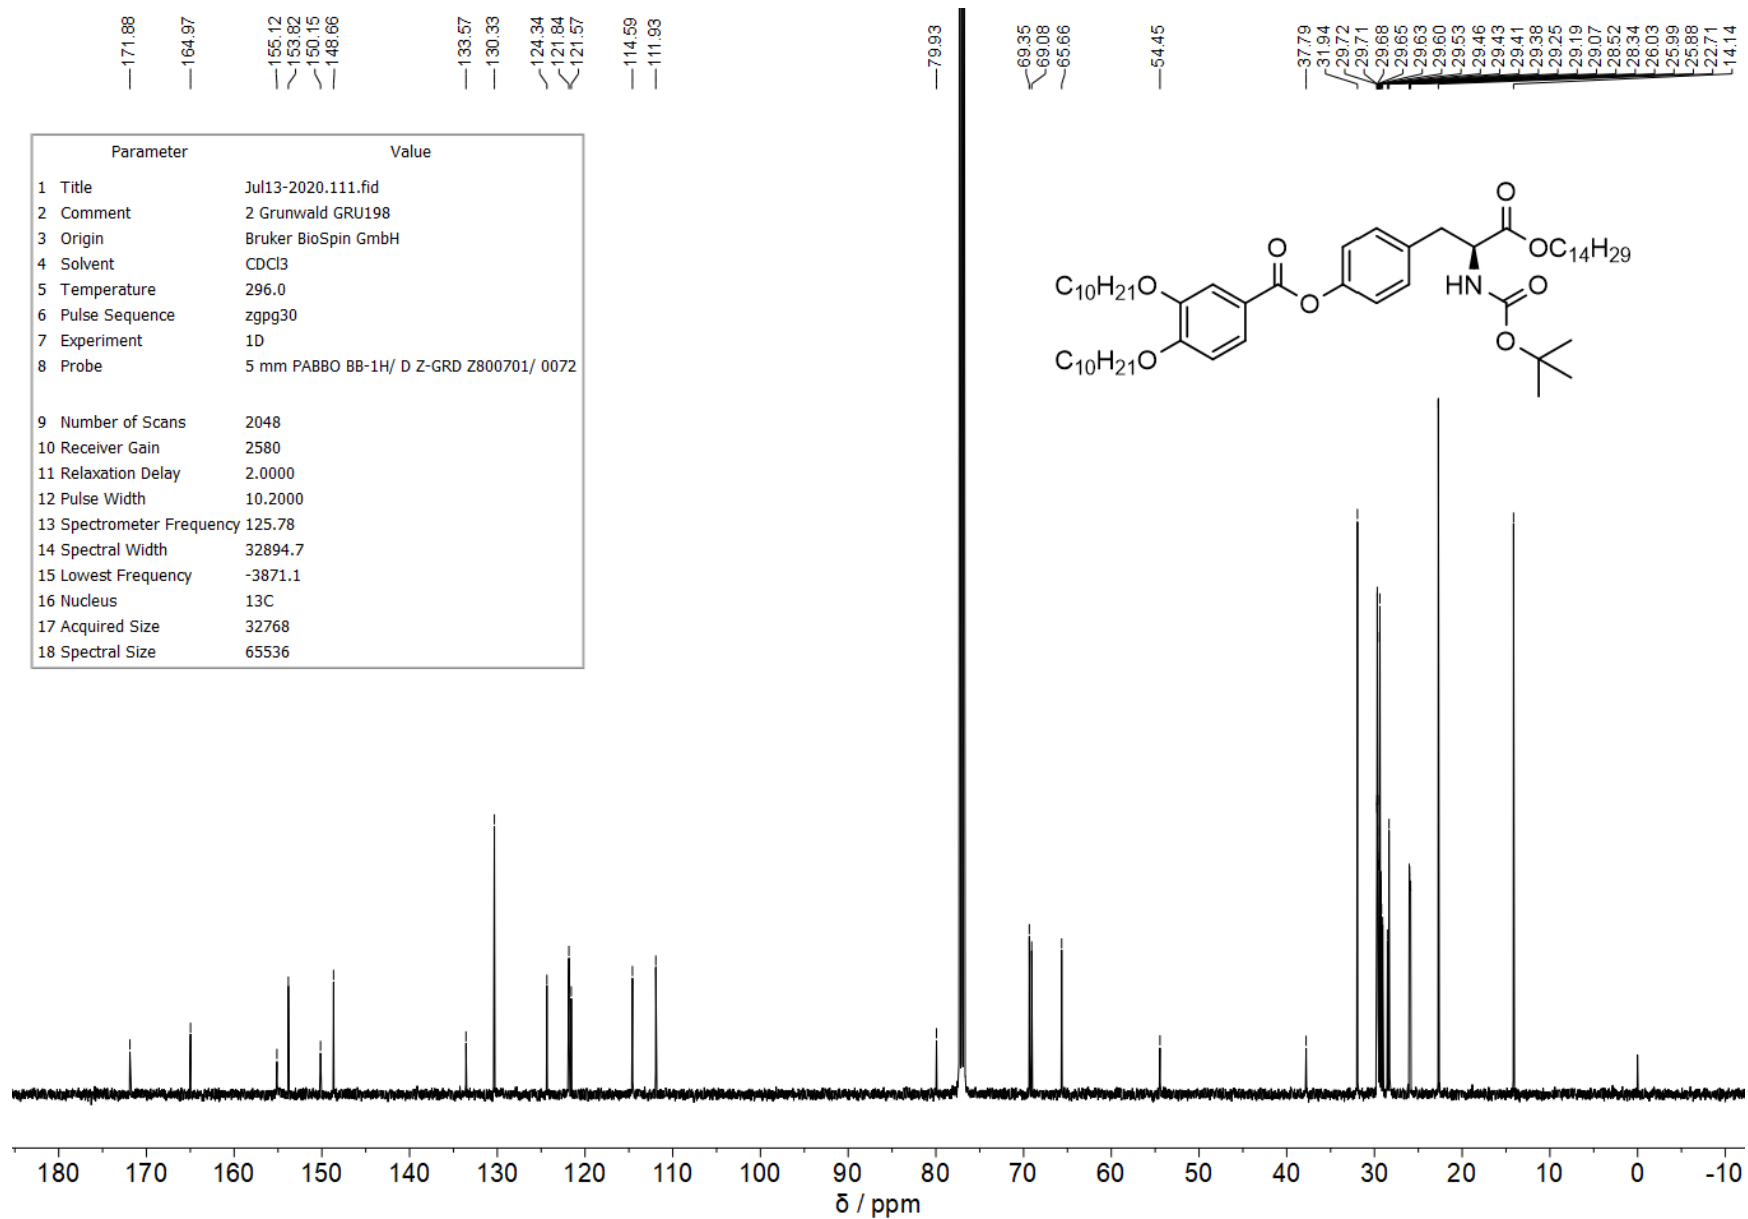

3,4-C<sub>12</sub>TyrC<sub>14</sub>Boc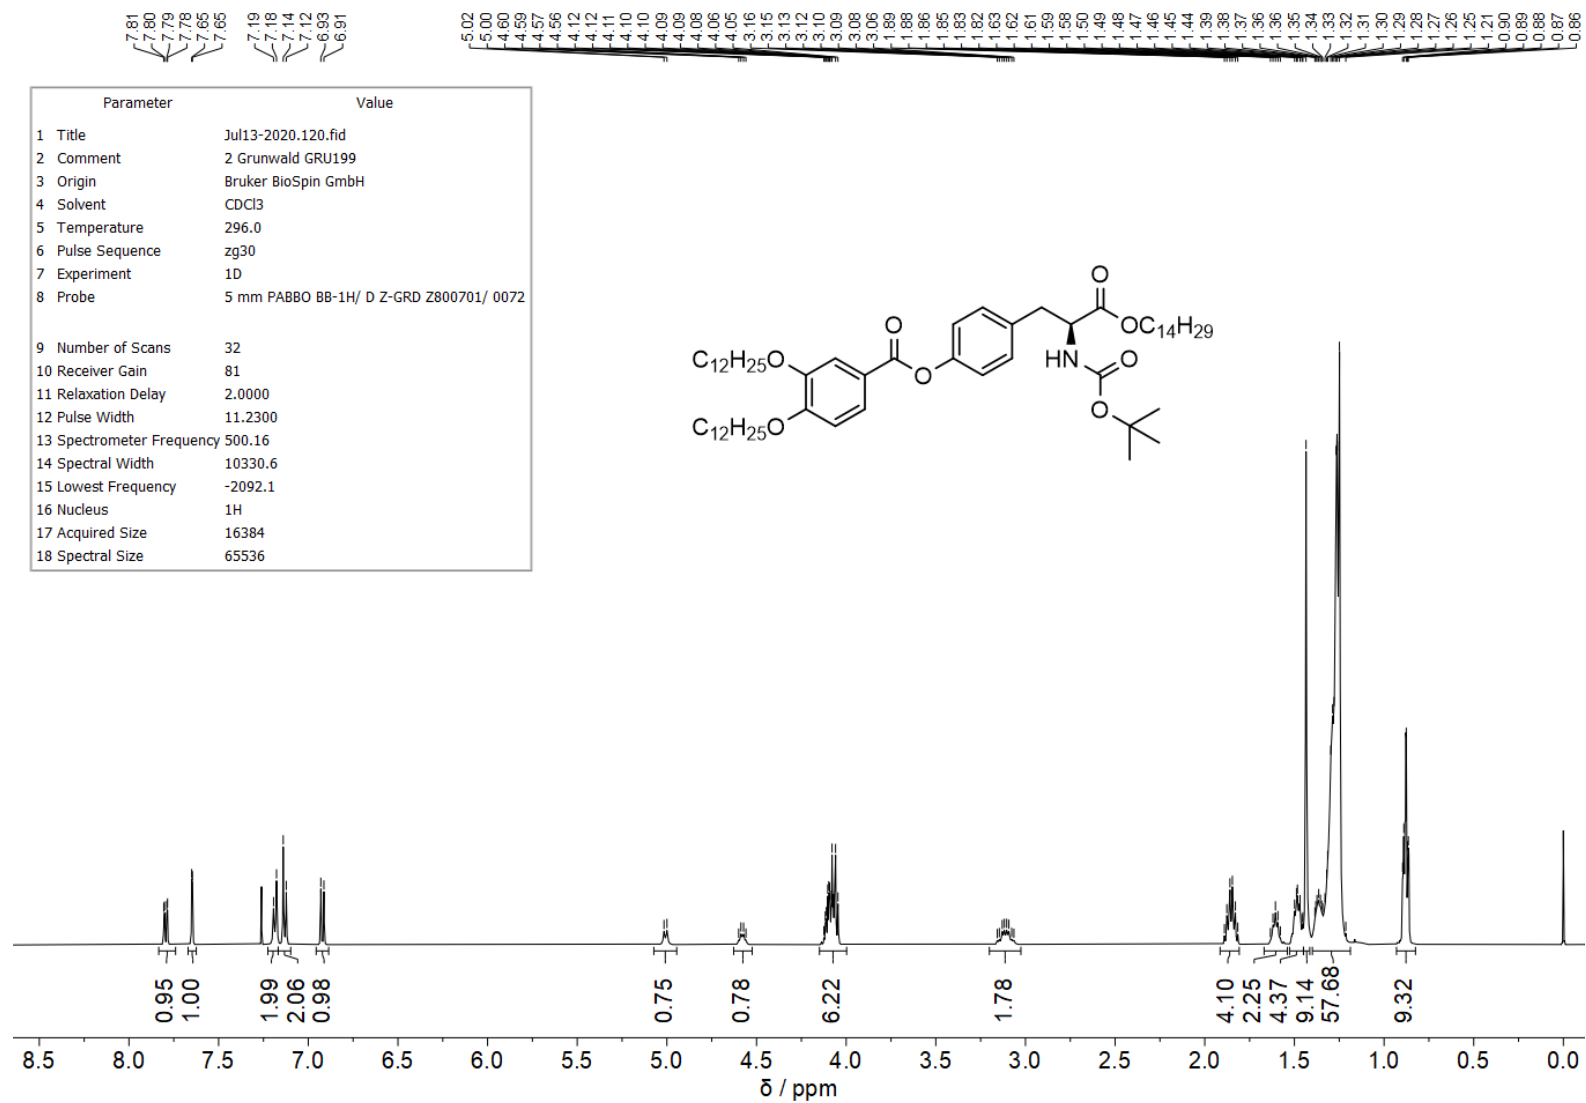



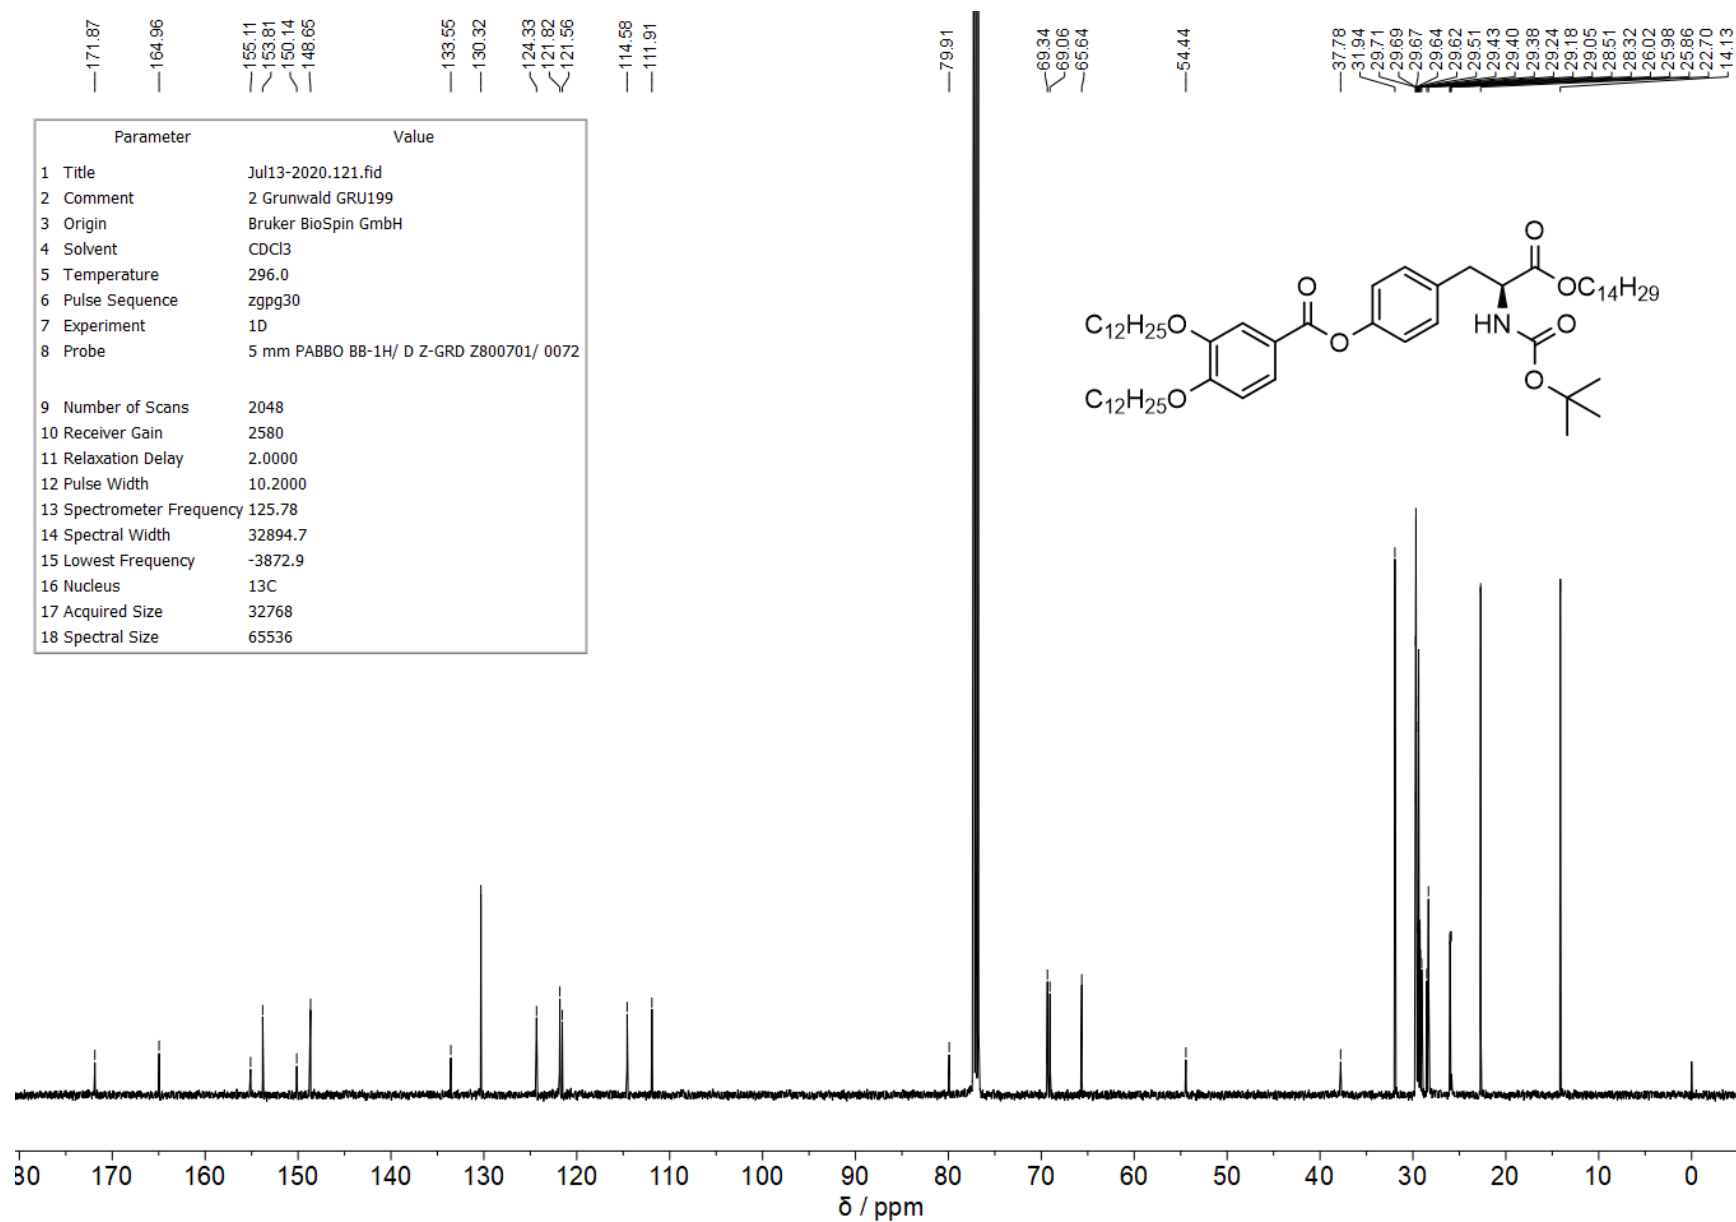

## 3,4-C14TyrC14Boc

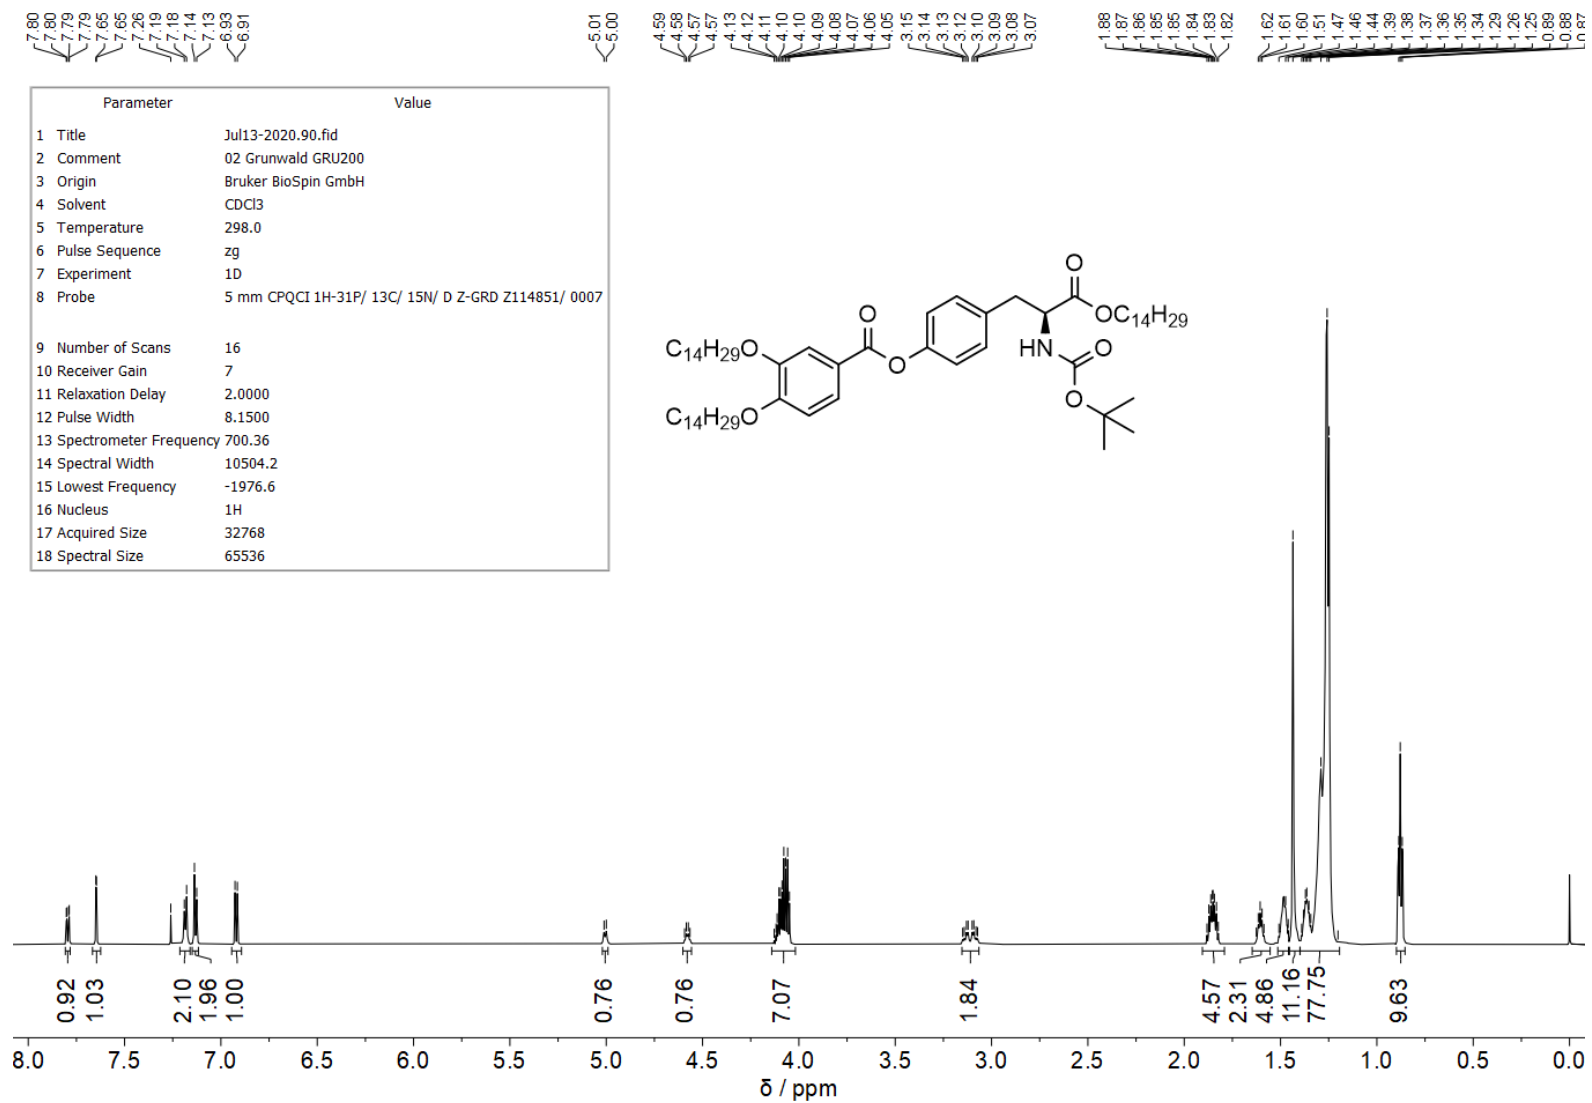

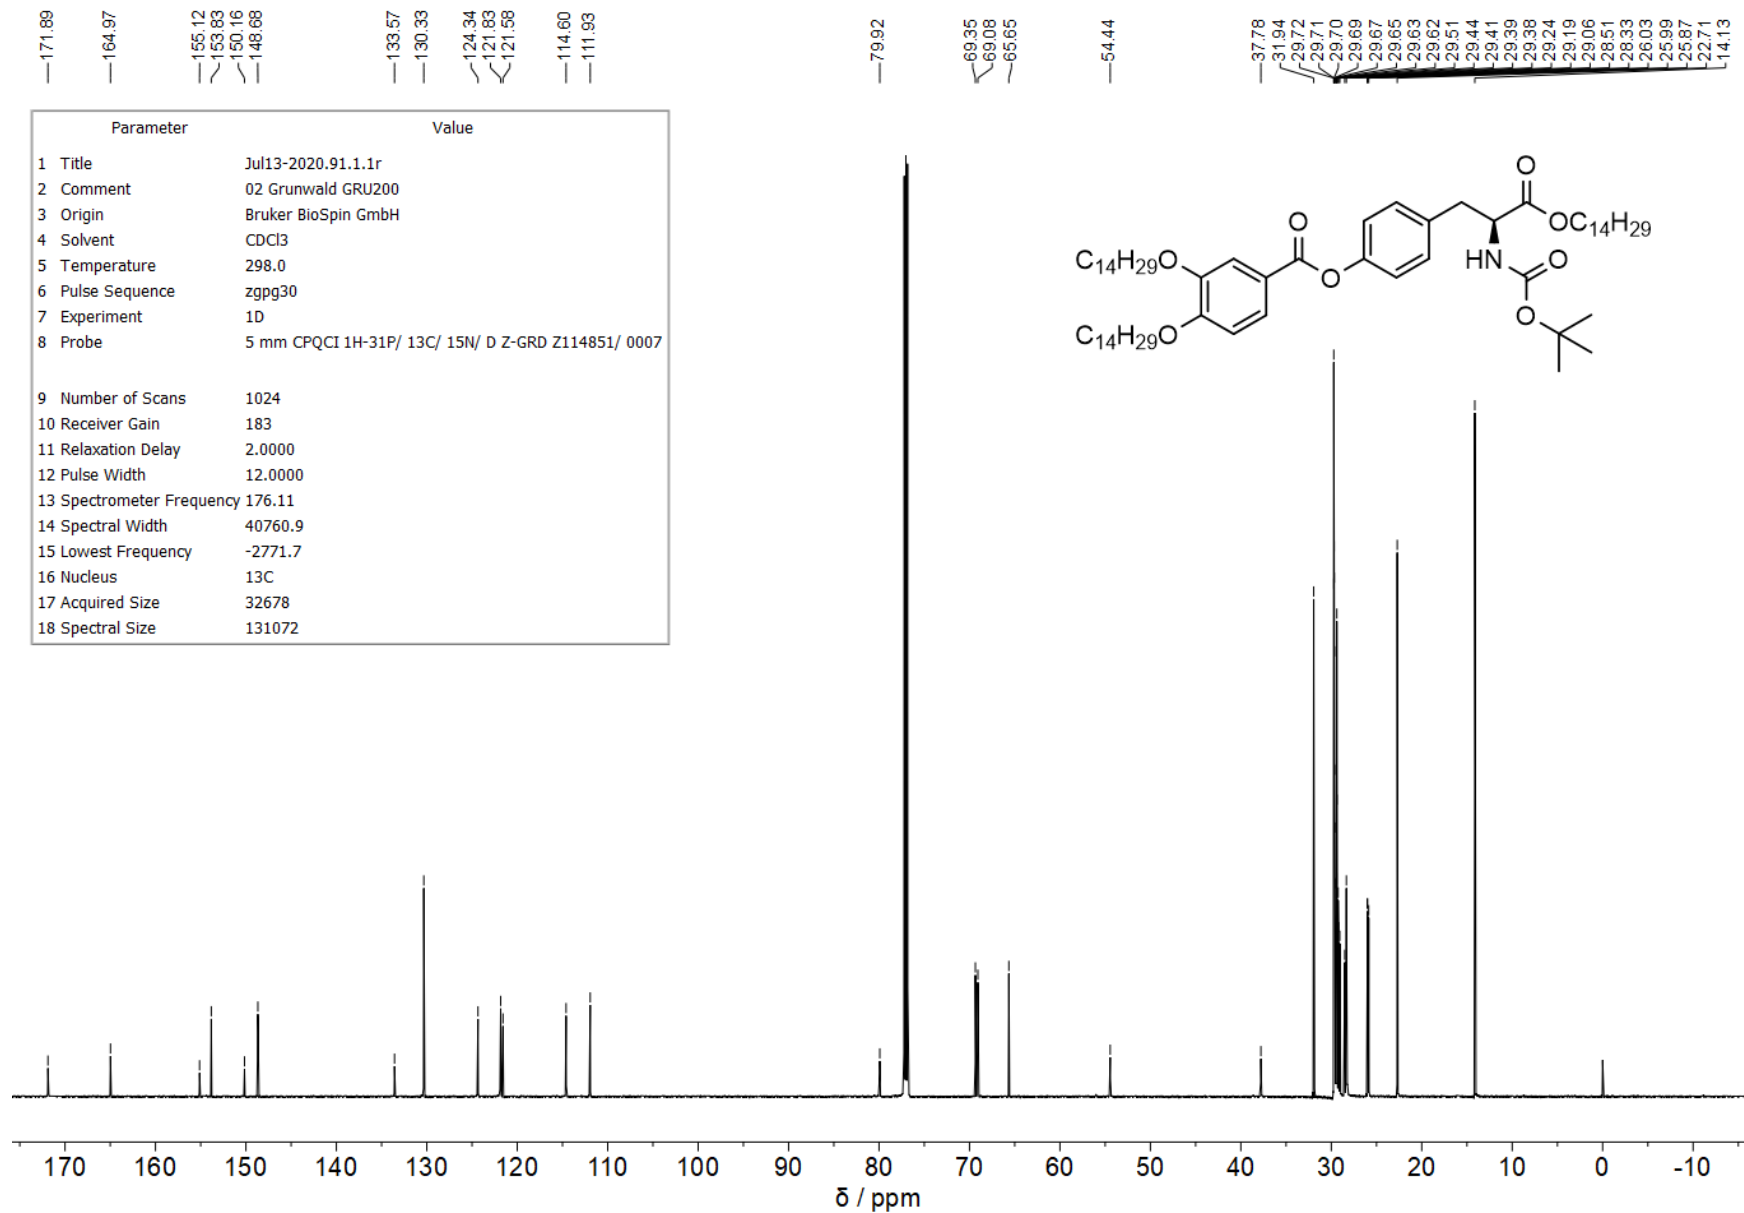

3,5-C<sub>10</sub>TyrC<sub>10</sub>Boc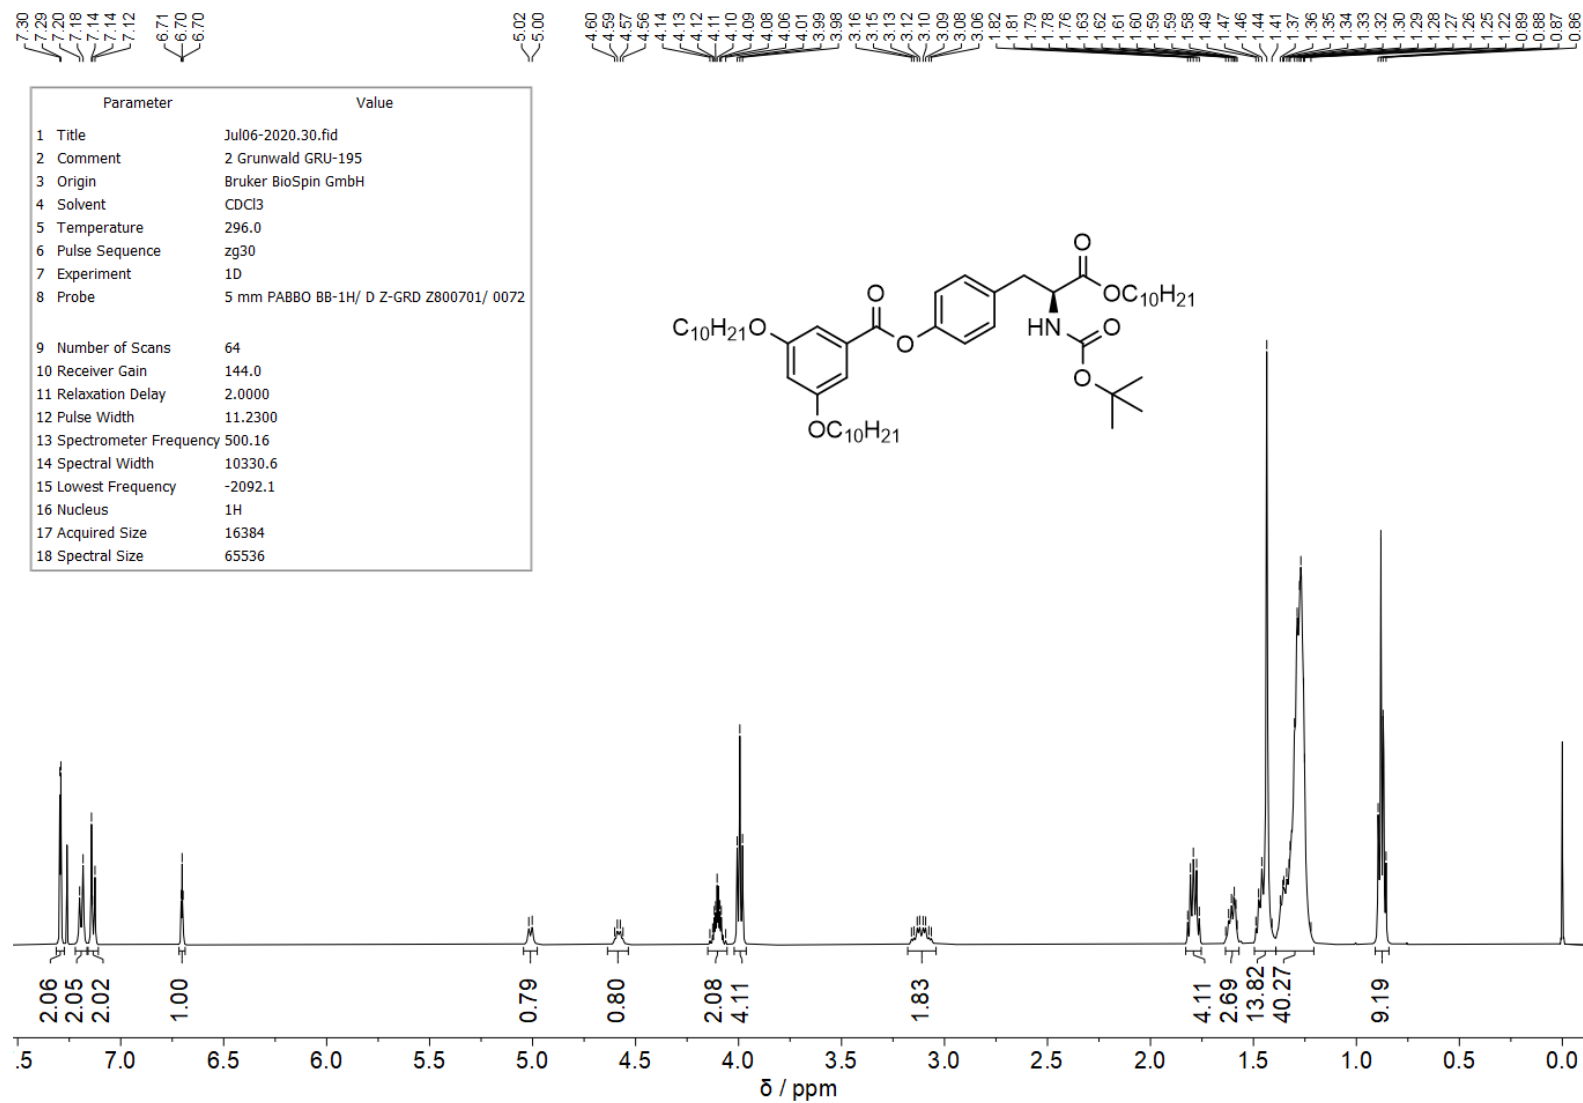

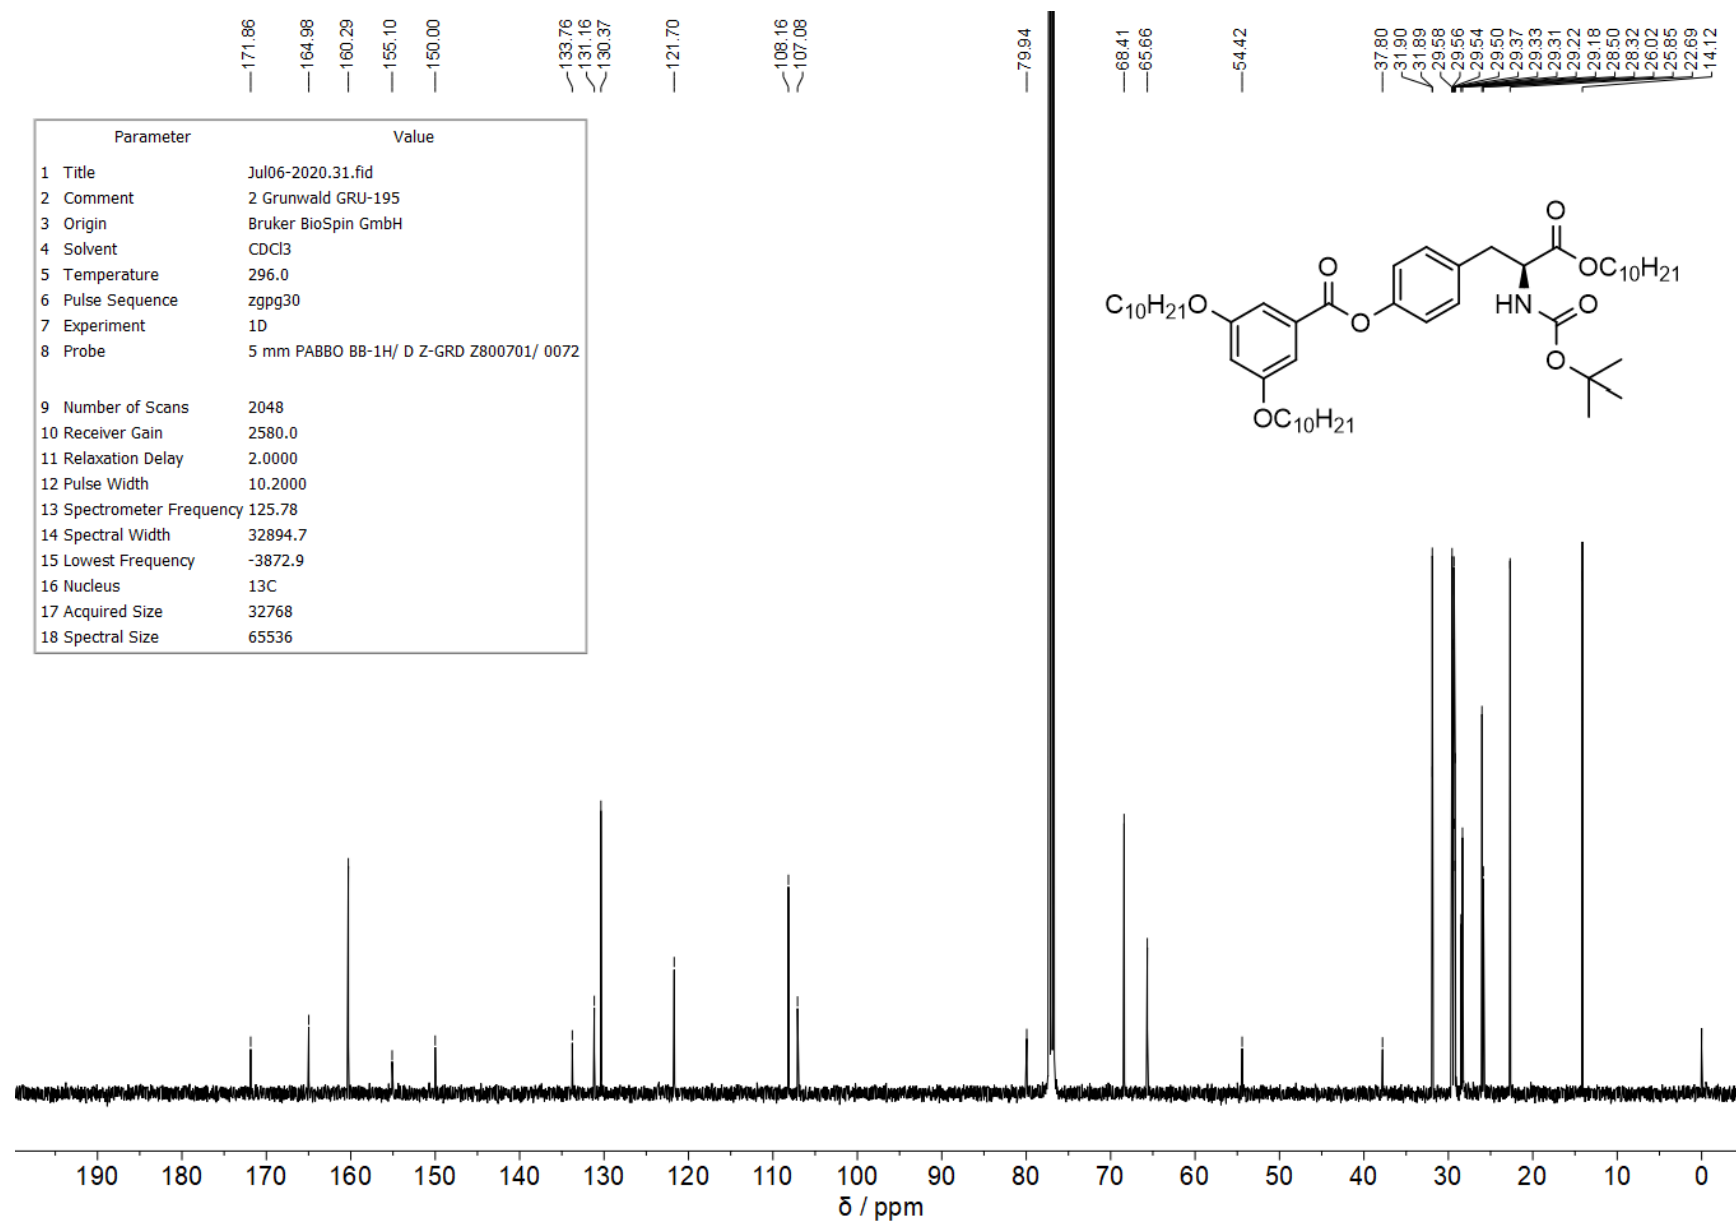

3,5-C<sub>12</sub>TyrC<sub>10</sub>Boc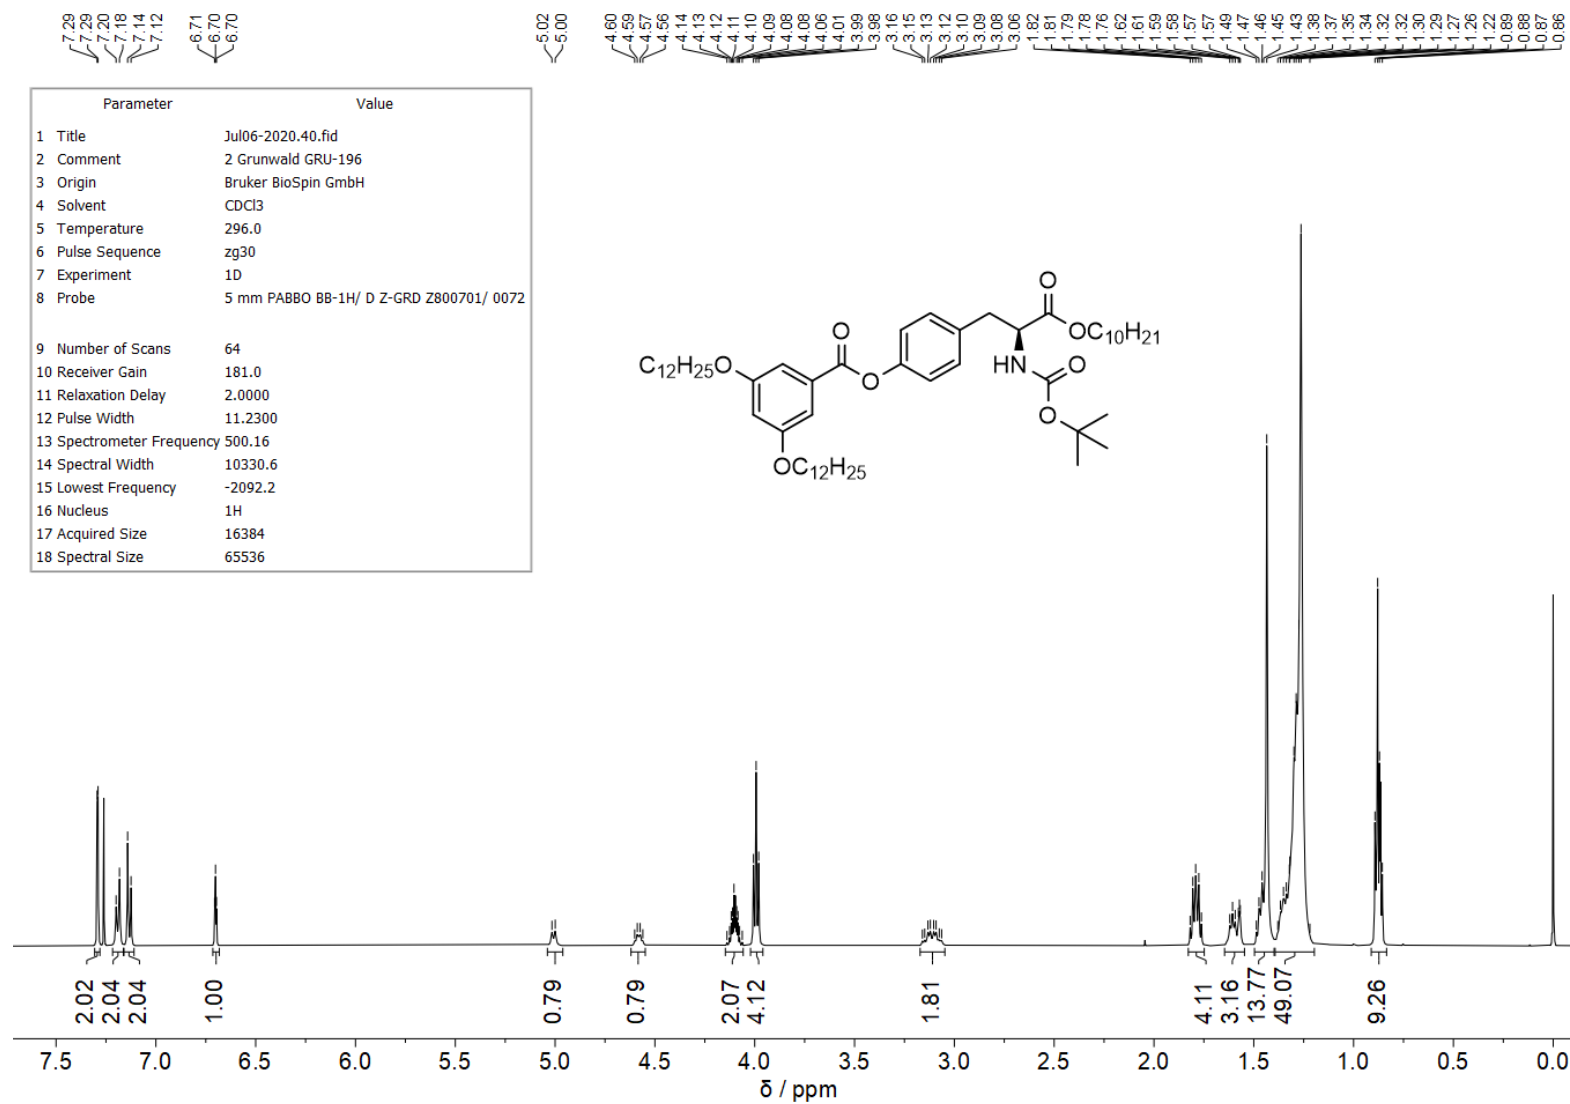

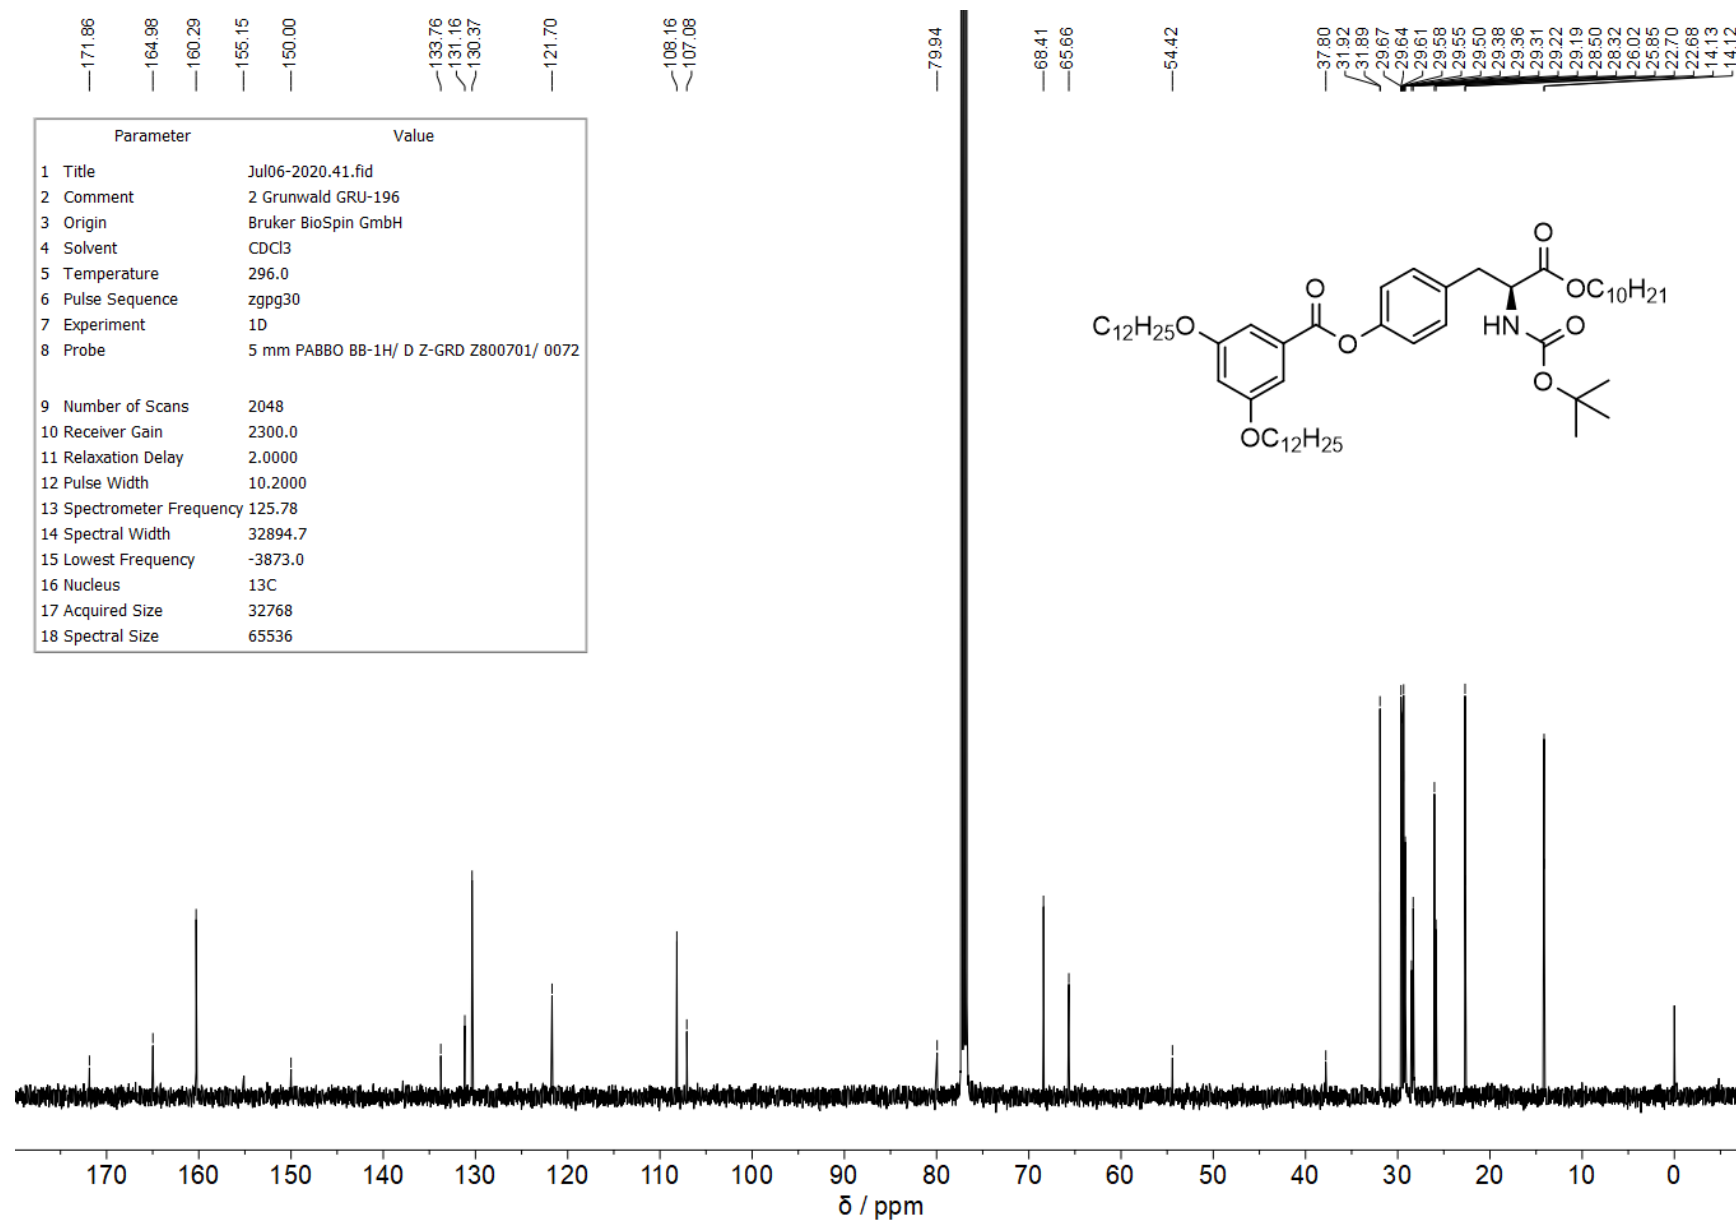

3,5-C<sub>14</sub>TyrC<sub>10</sub>Boc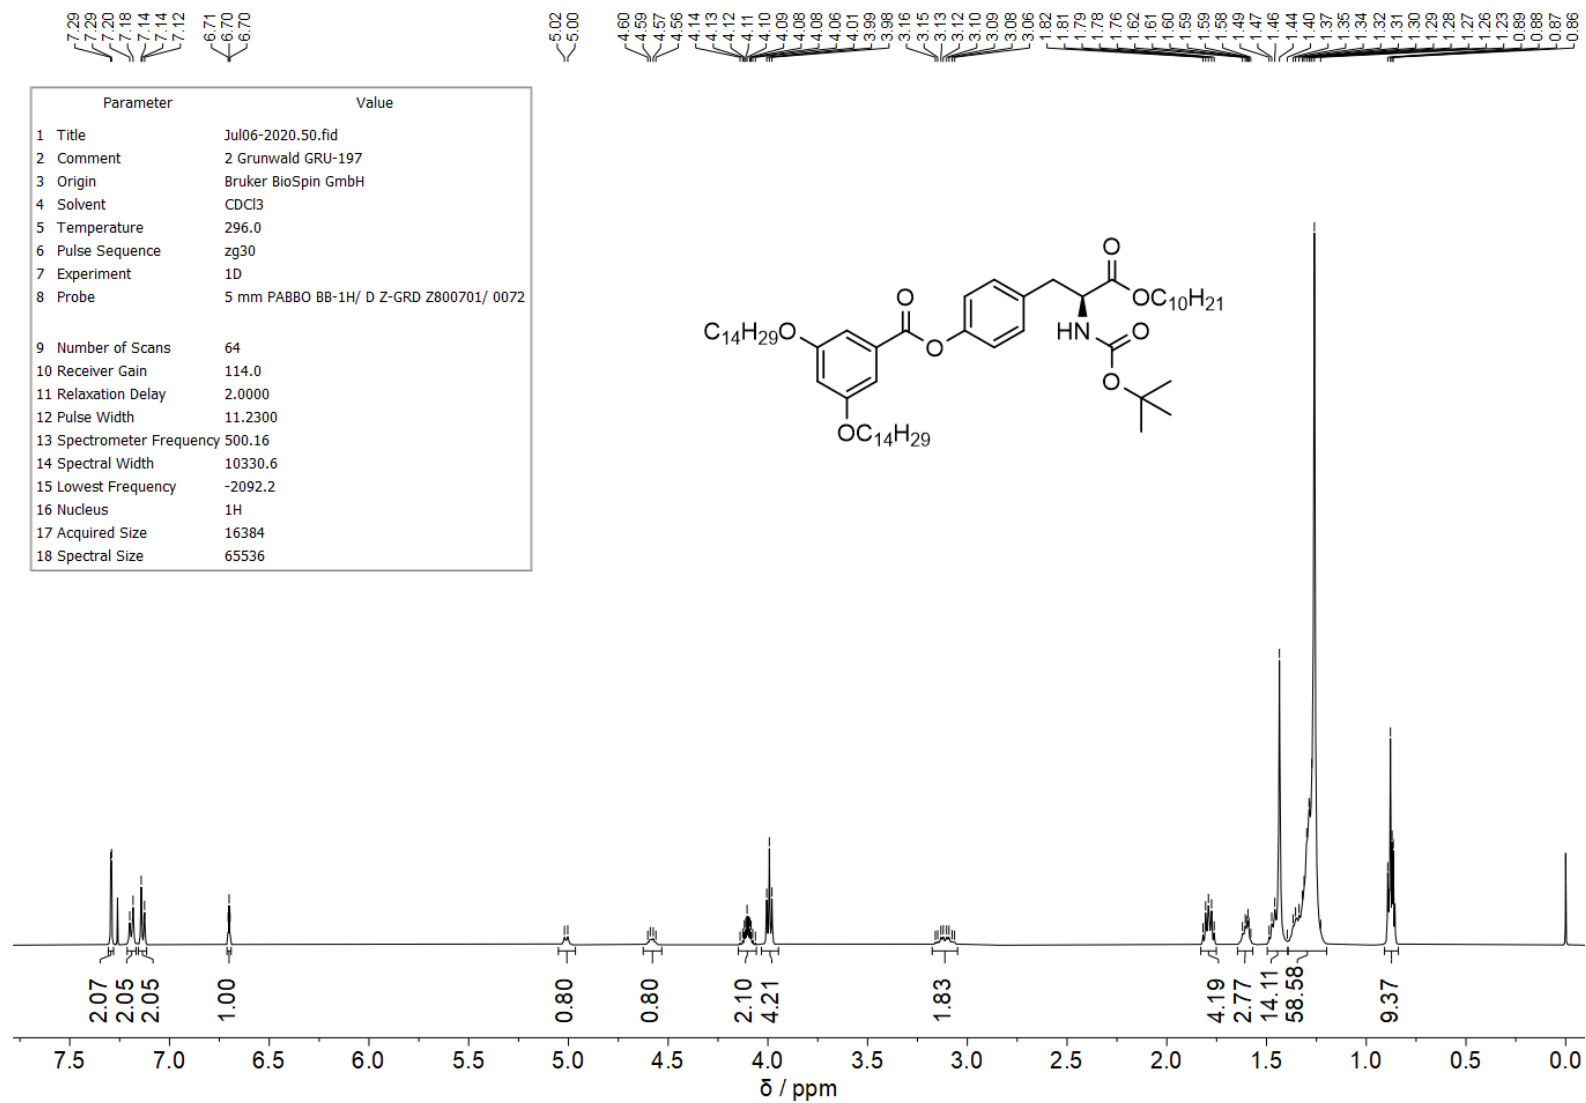



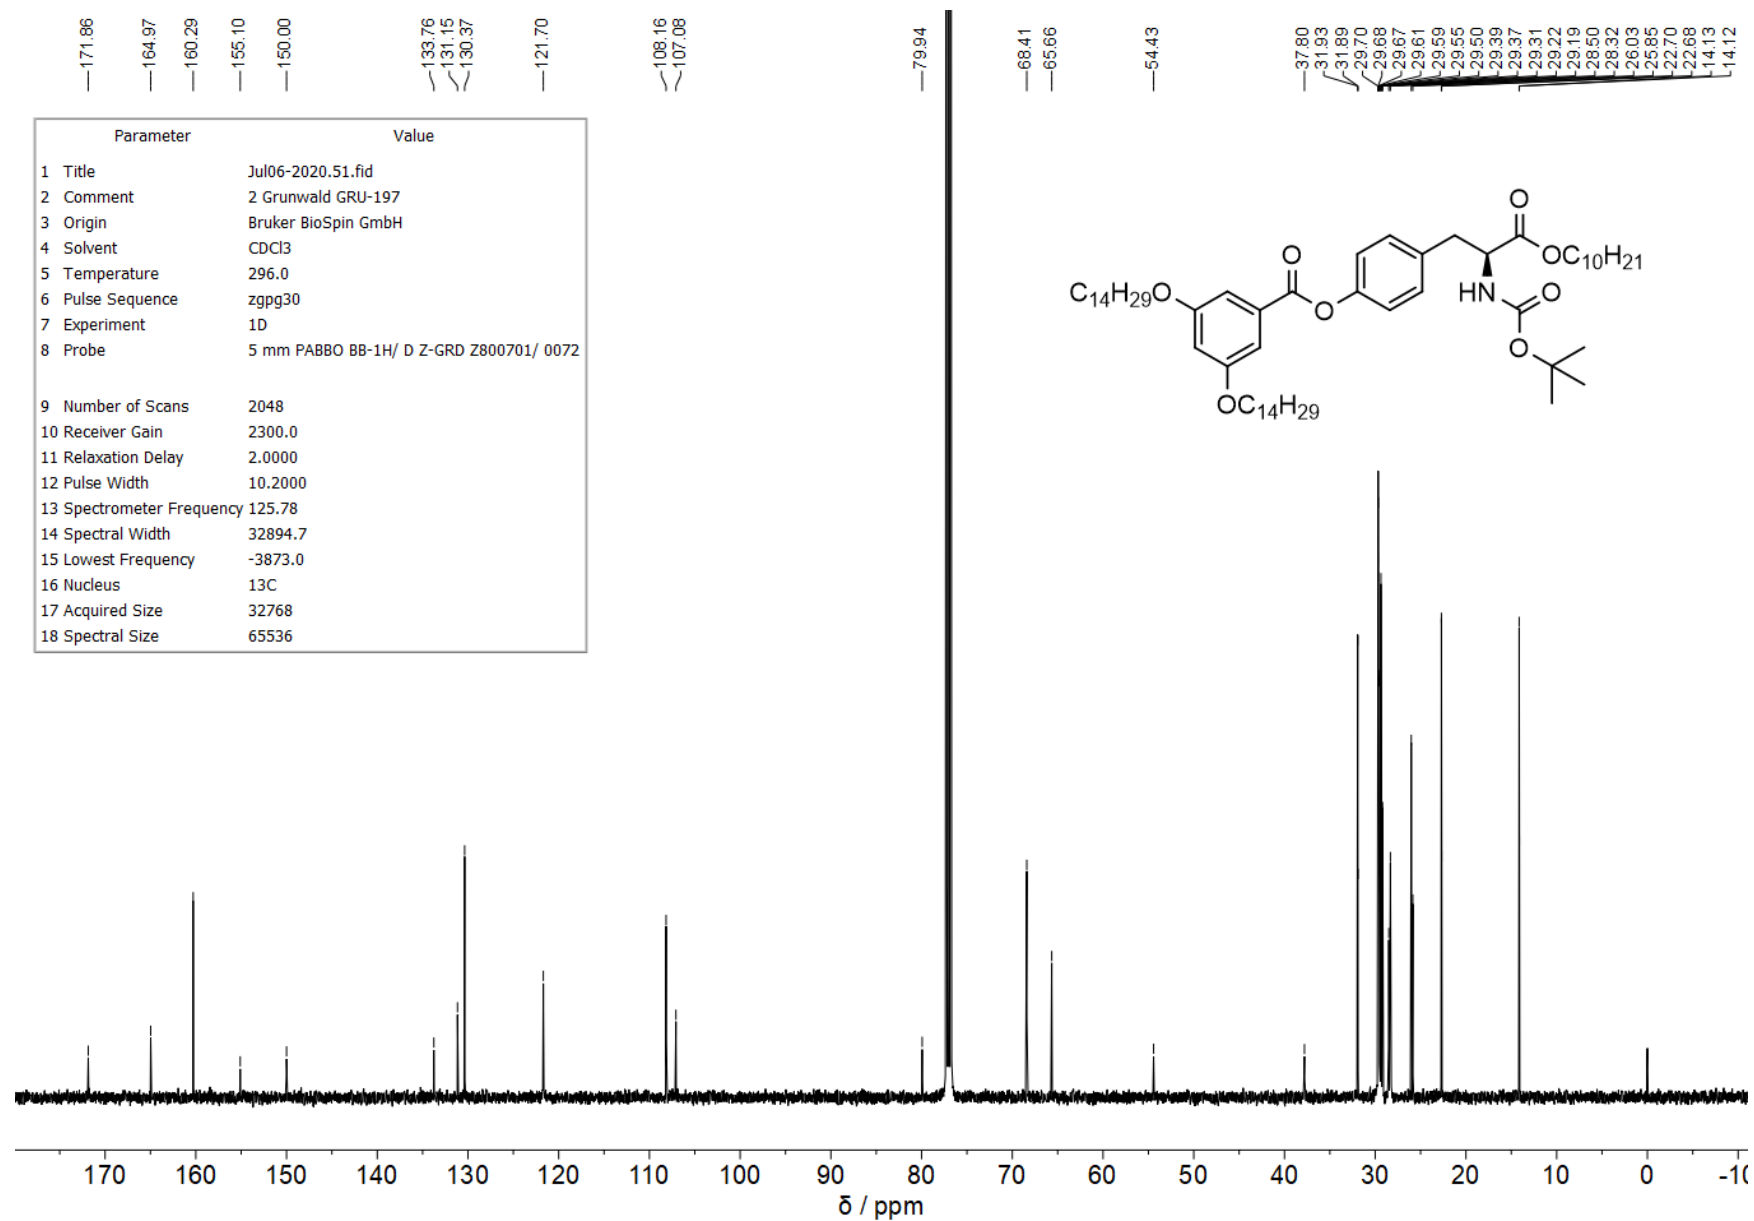

3,5-C<sub>10</sub>TyrC<sub>12</sub>Boc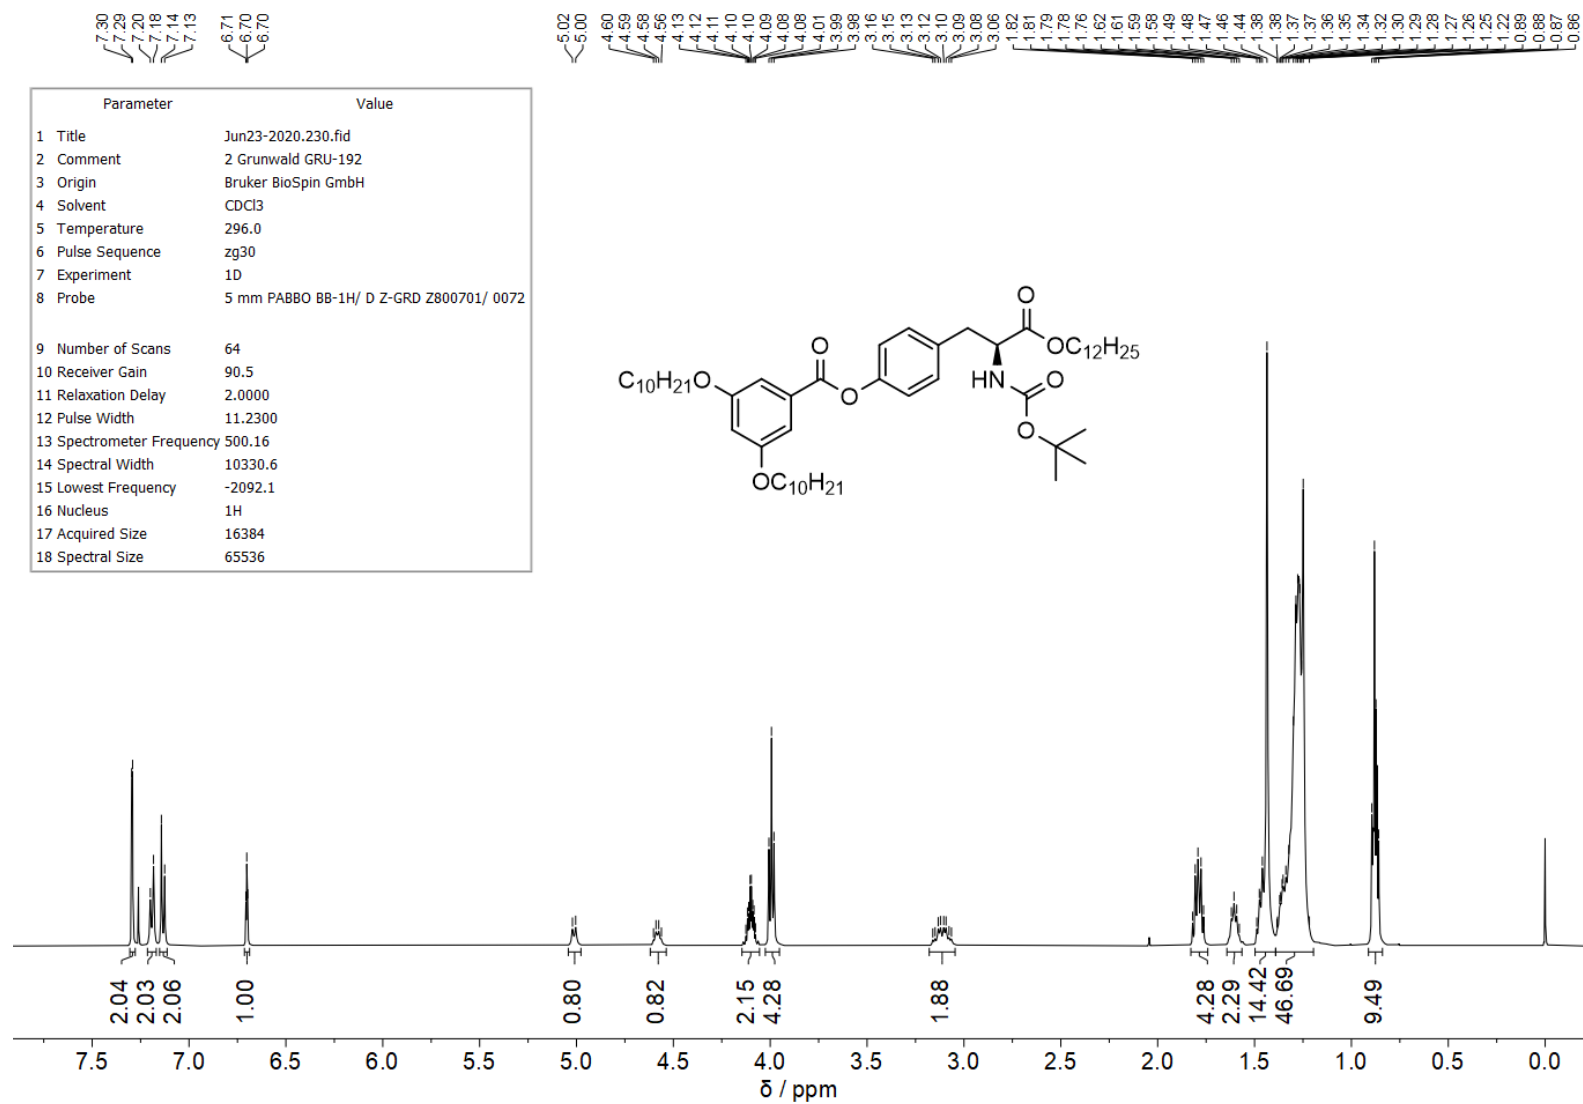

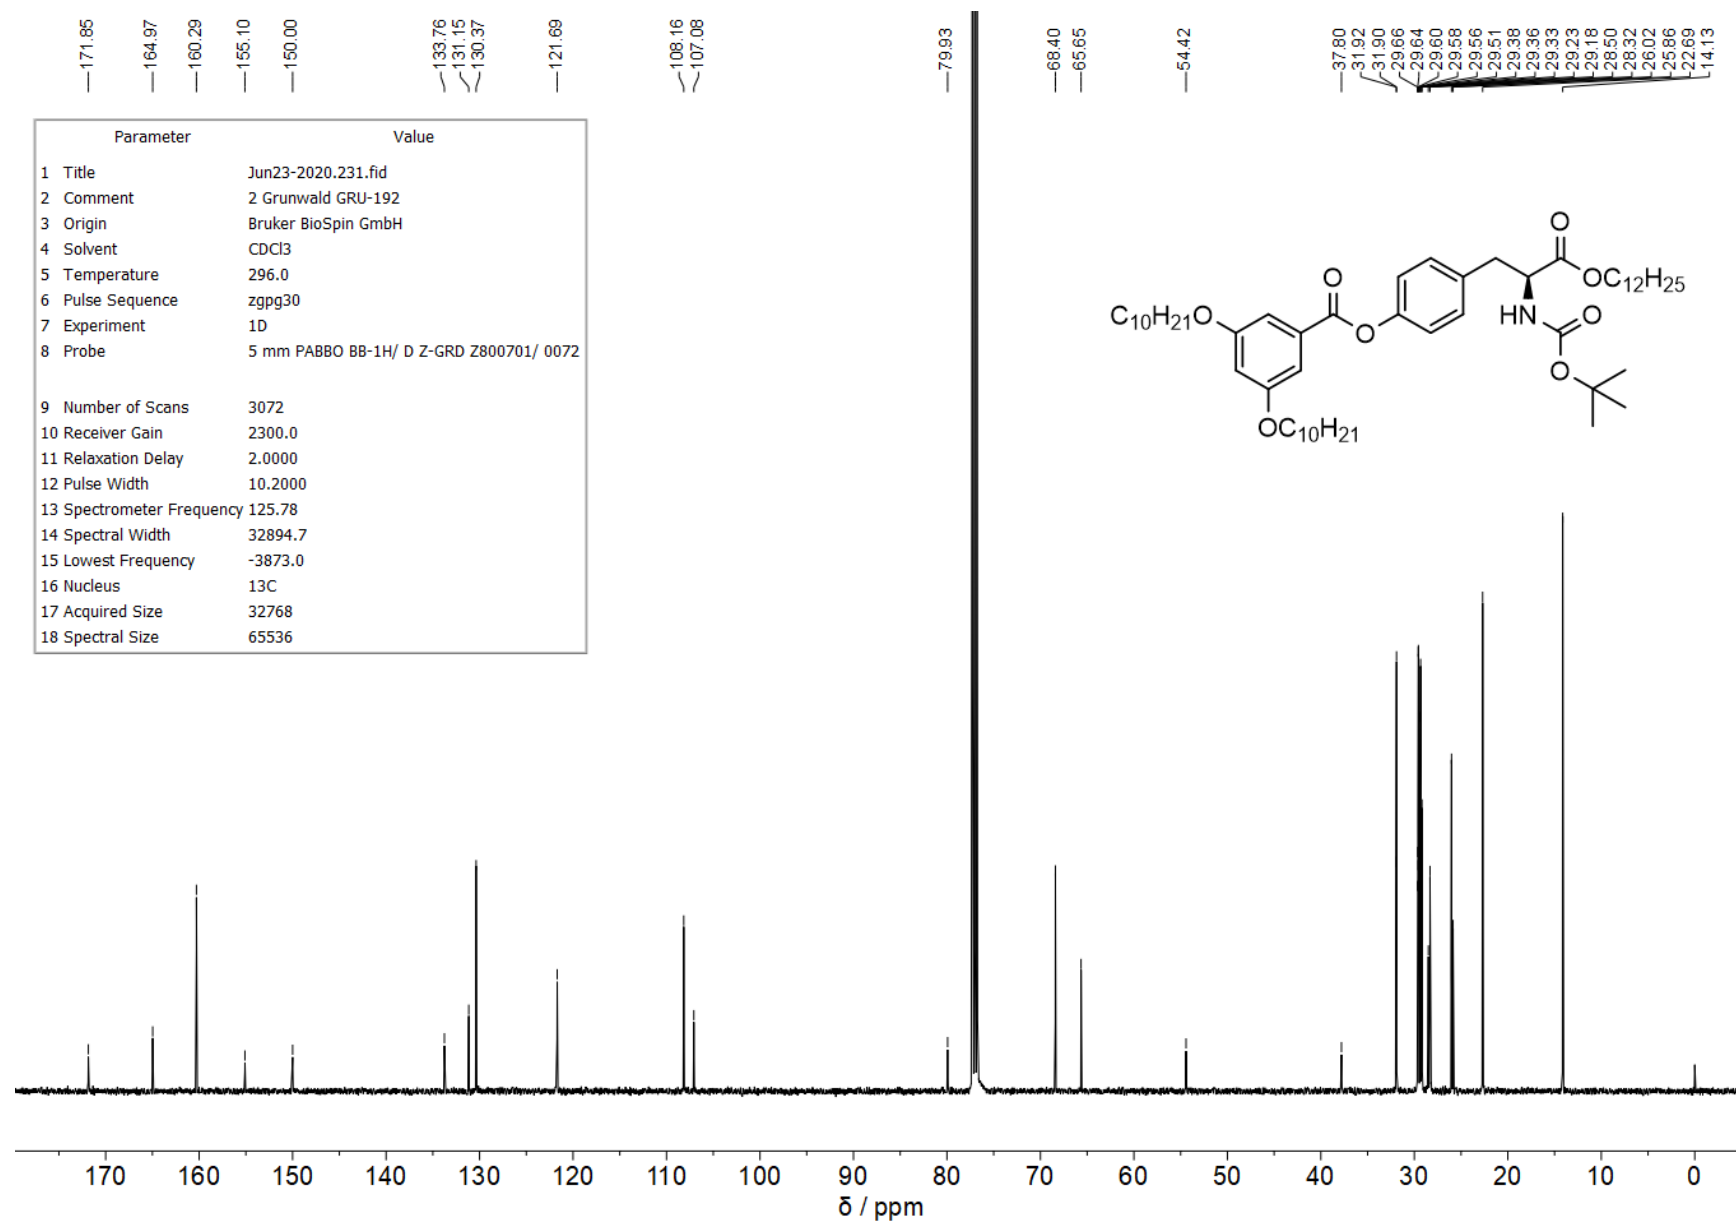

3,5-C<sub>12</sub>TyrC<sub>12</sub>Boc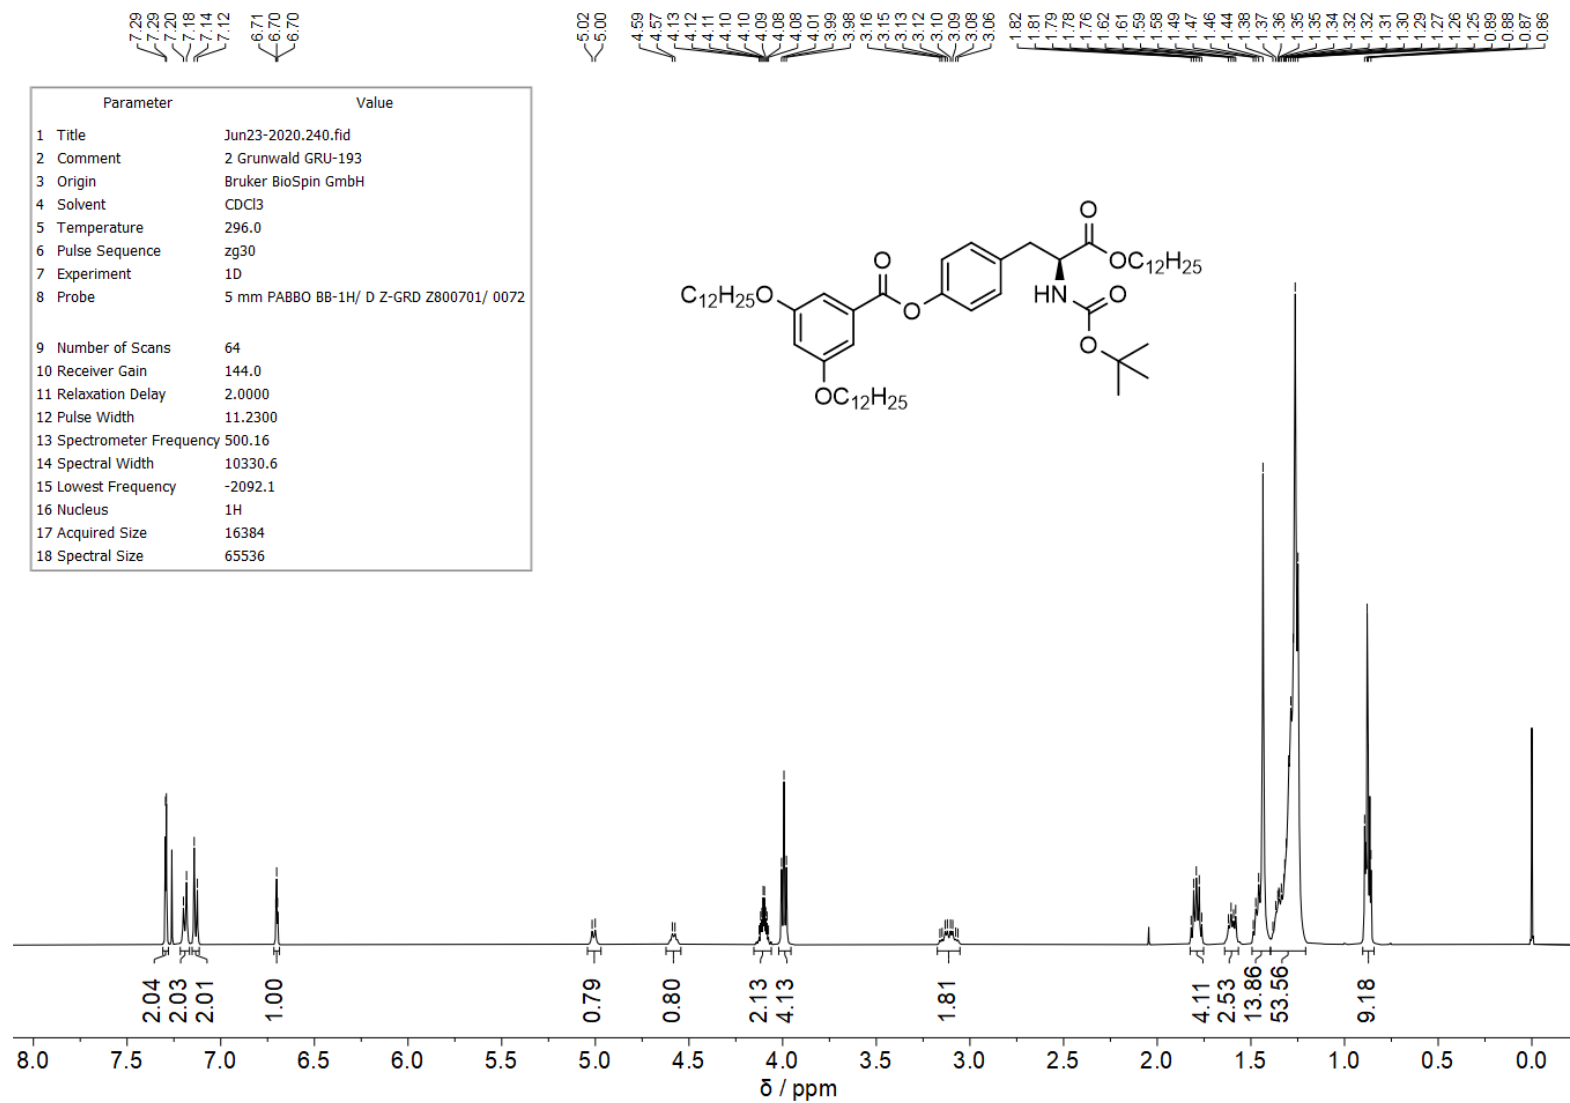

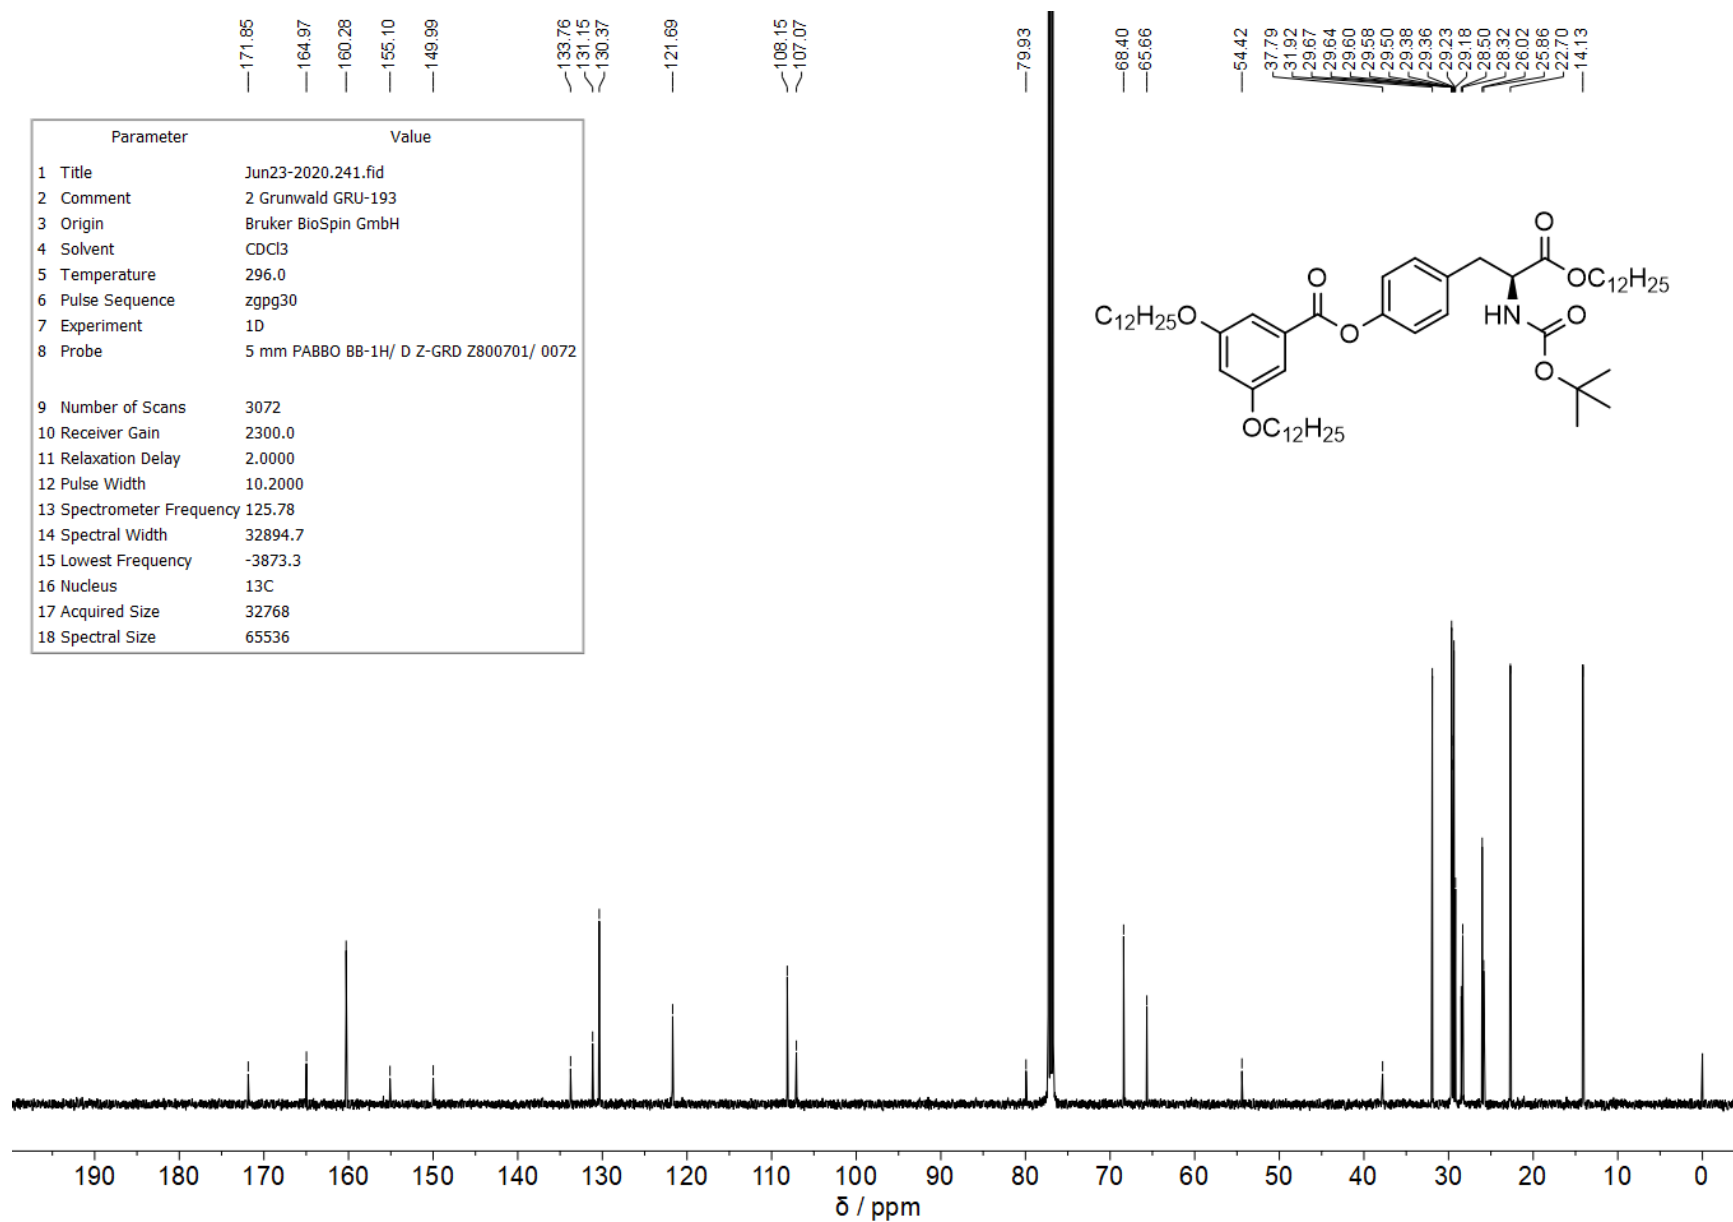

3,5-C<sub>14</sub>TyrC<sub>12</sub>Boc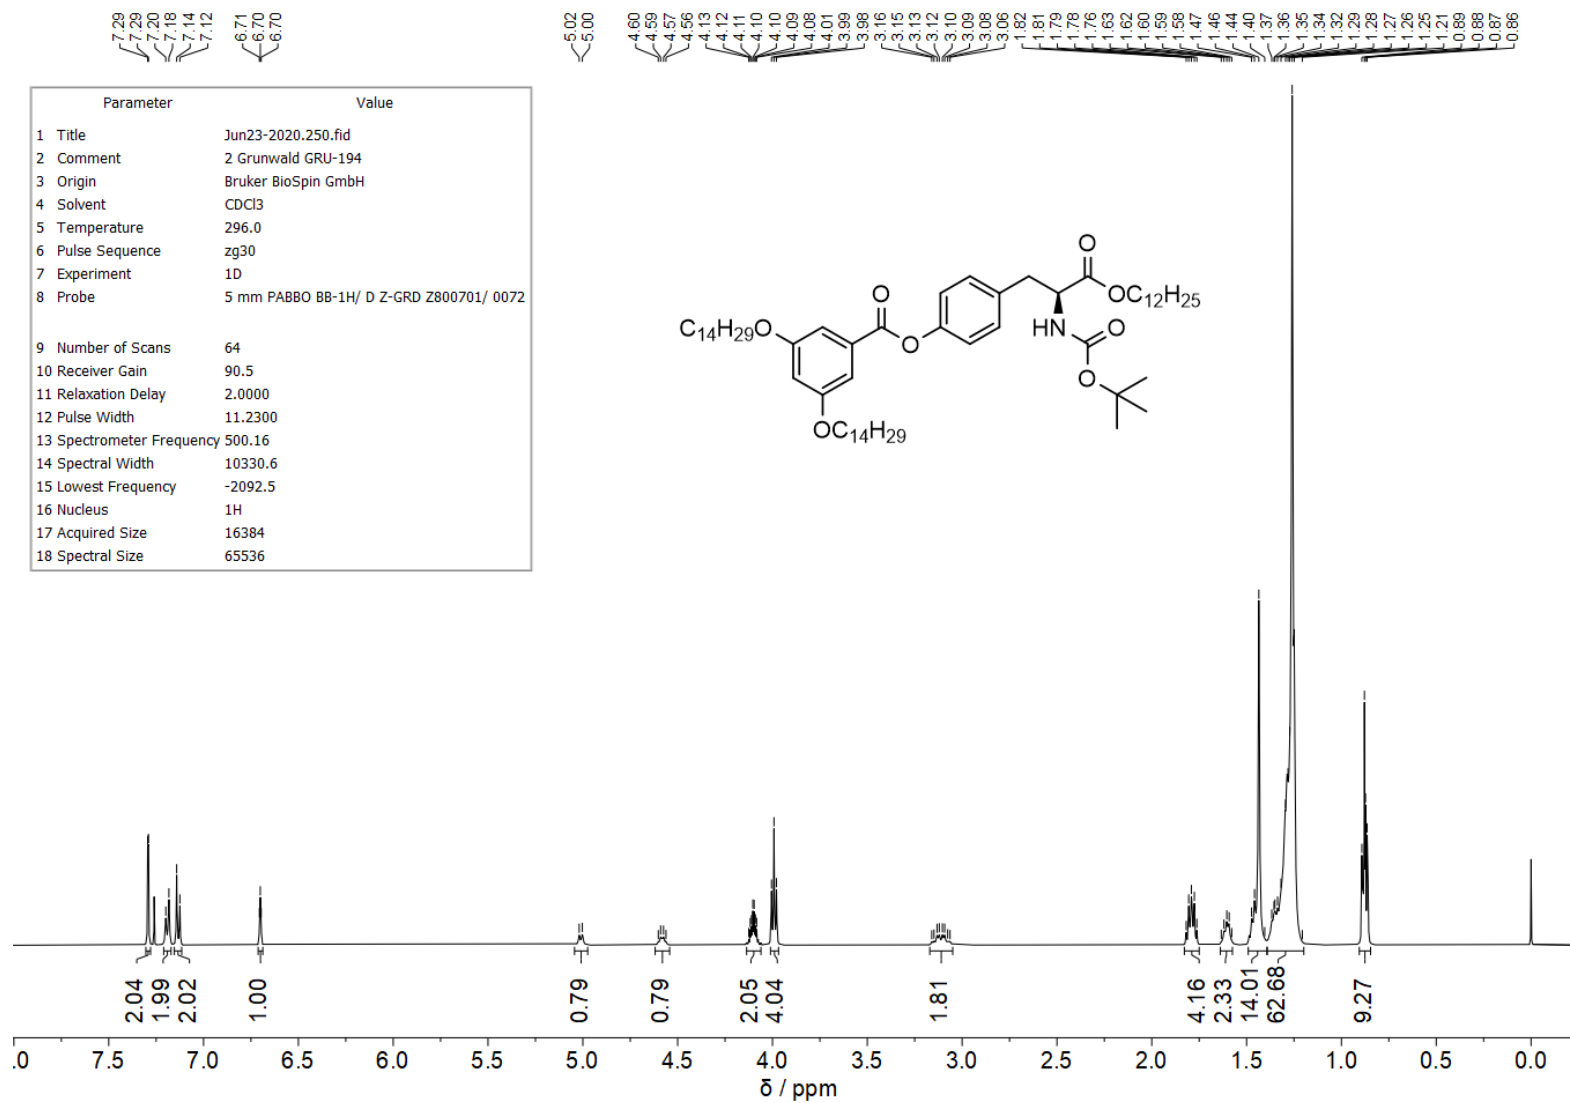

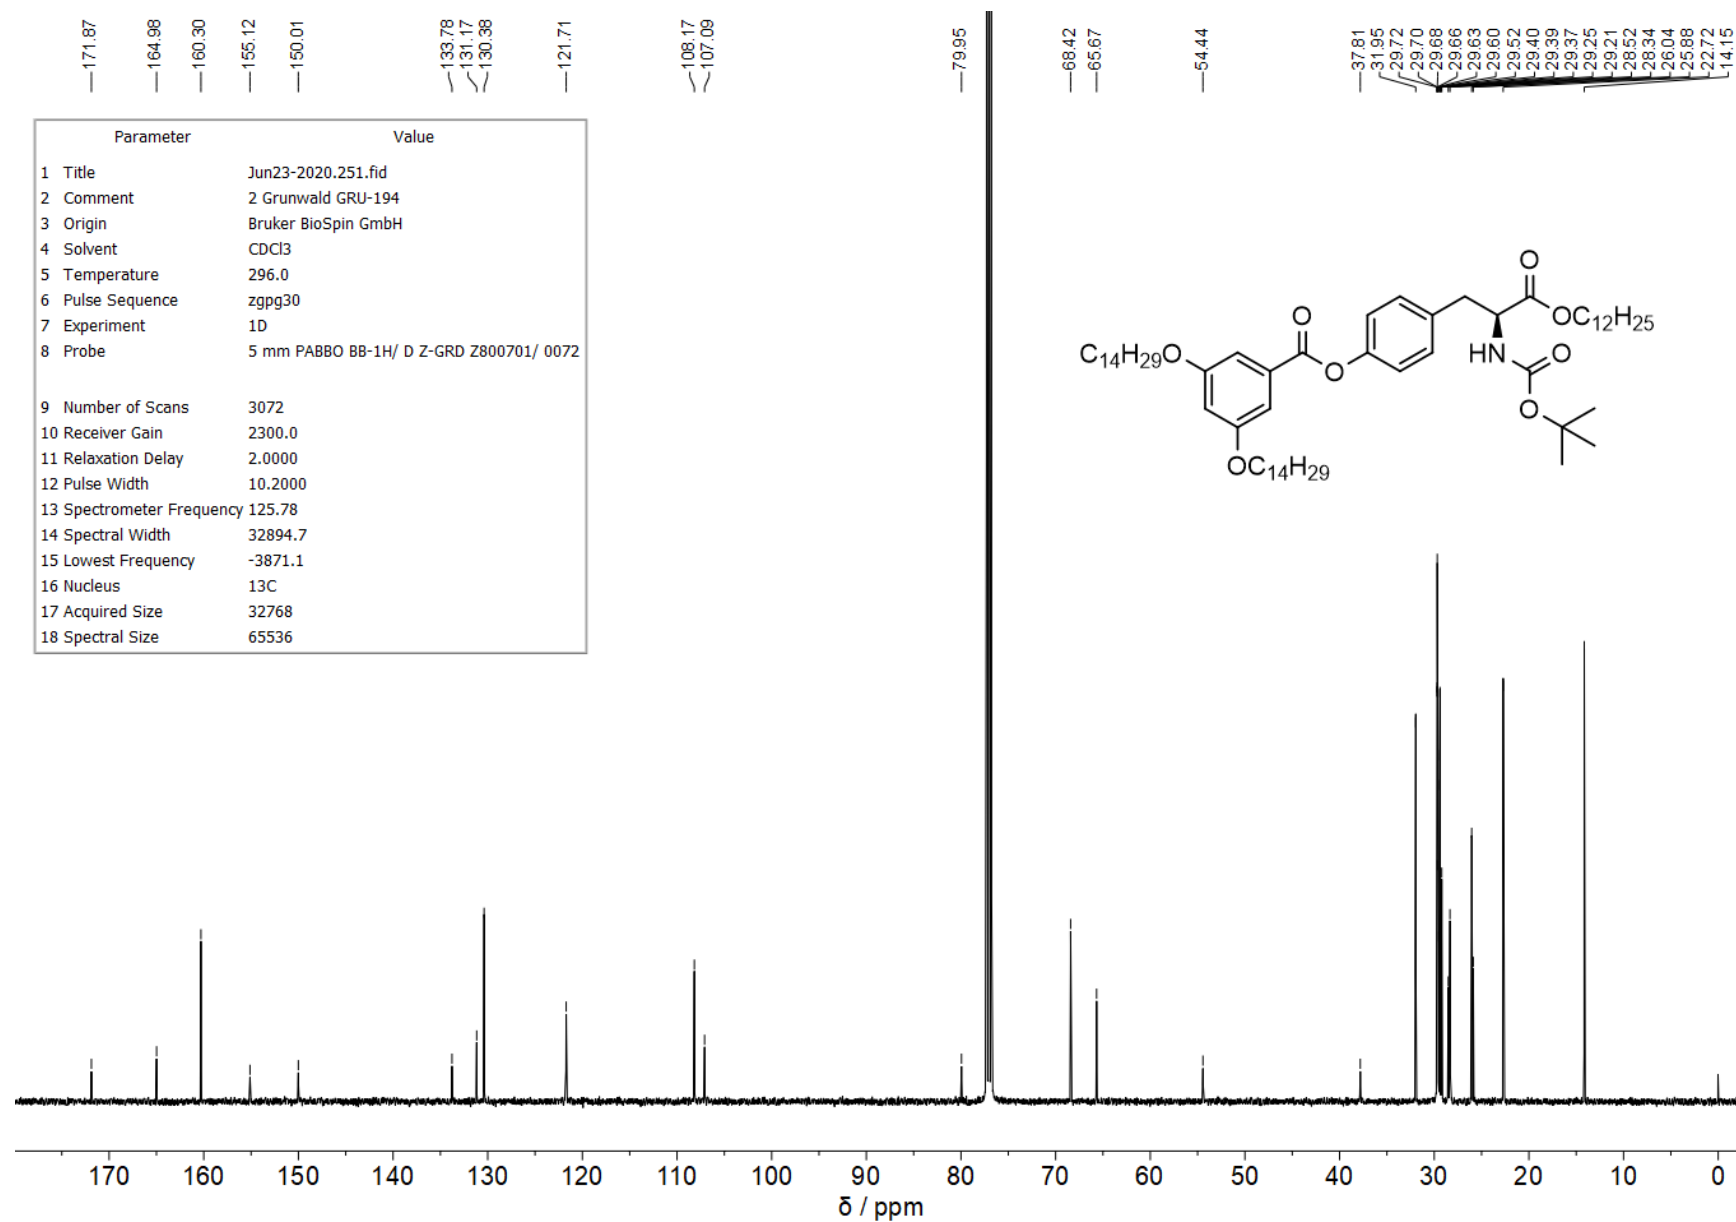

3,5-C<sub>10</sub>TyrC<sub>14</sub>Boc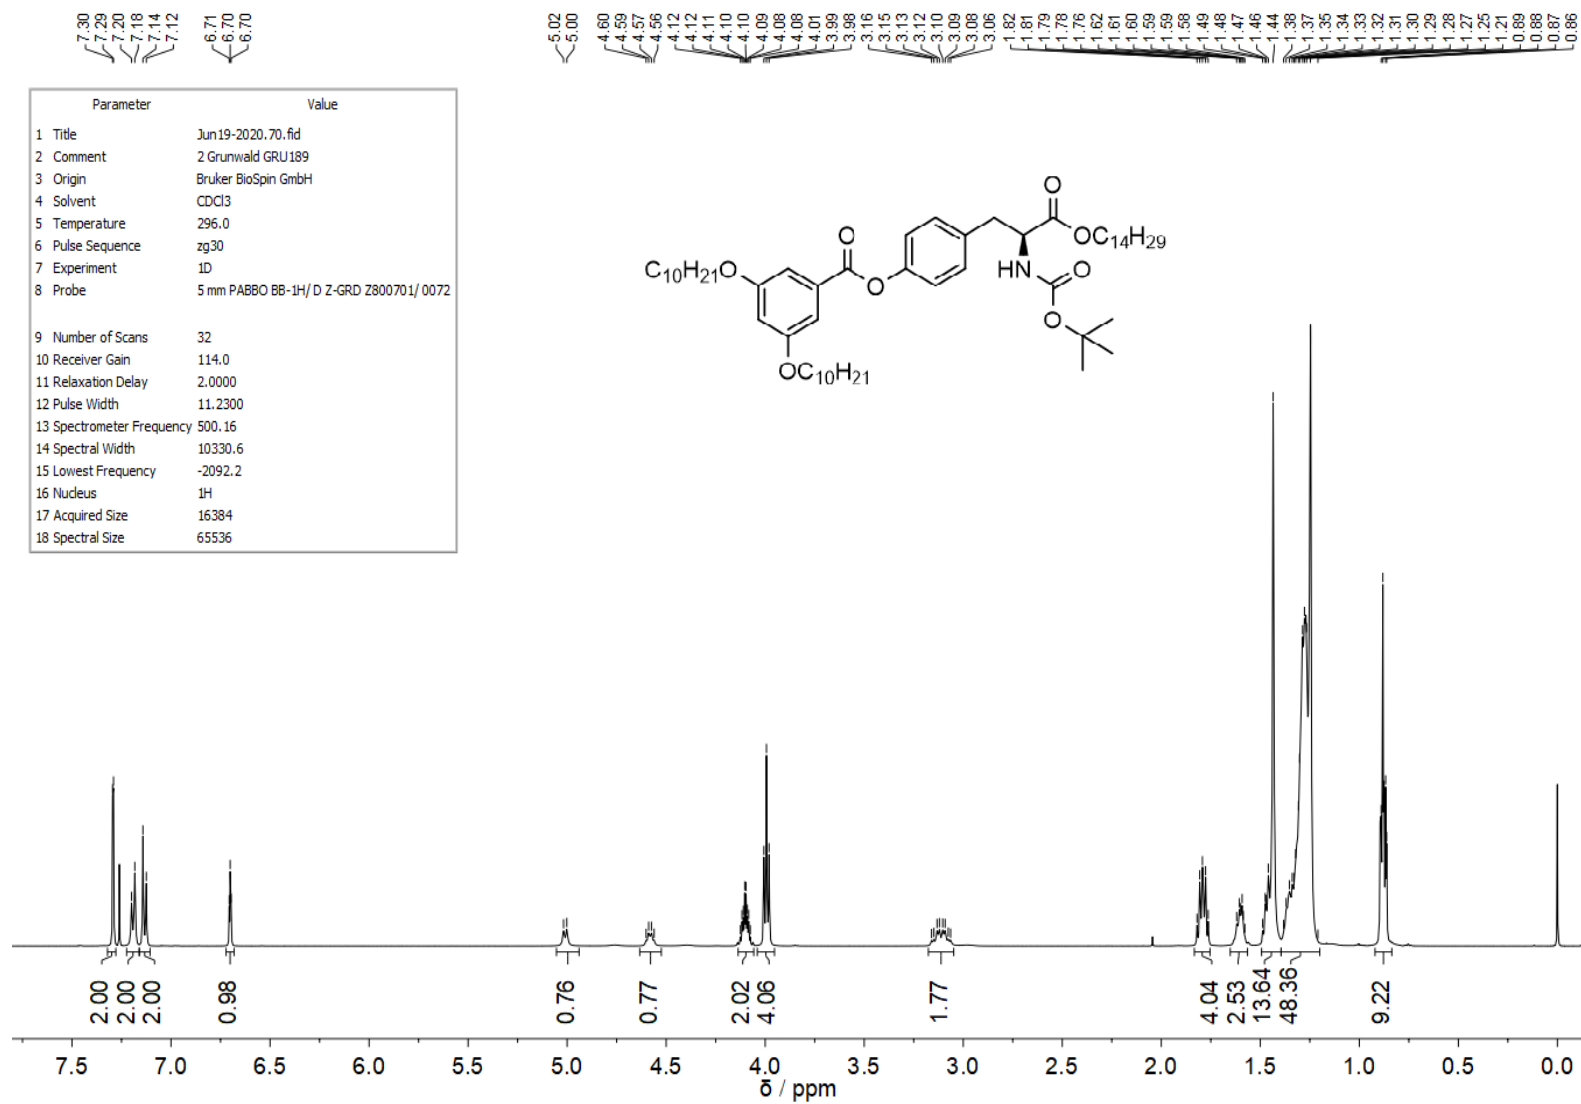



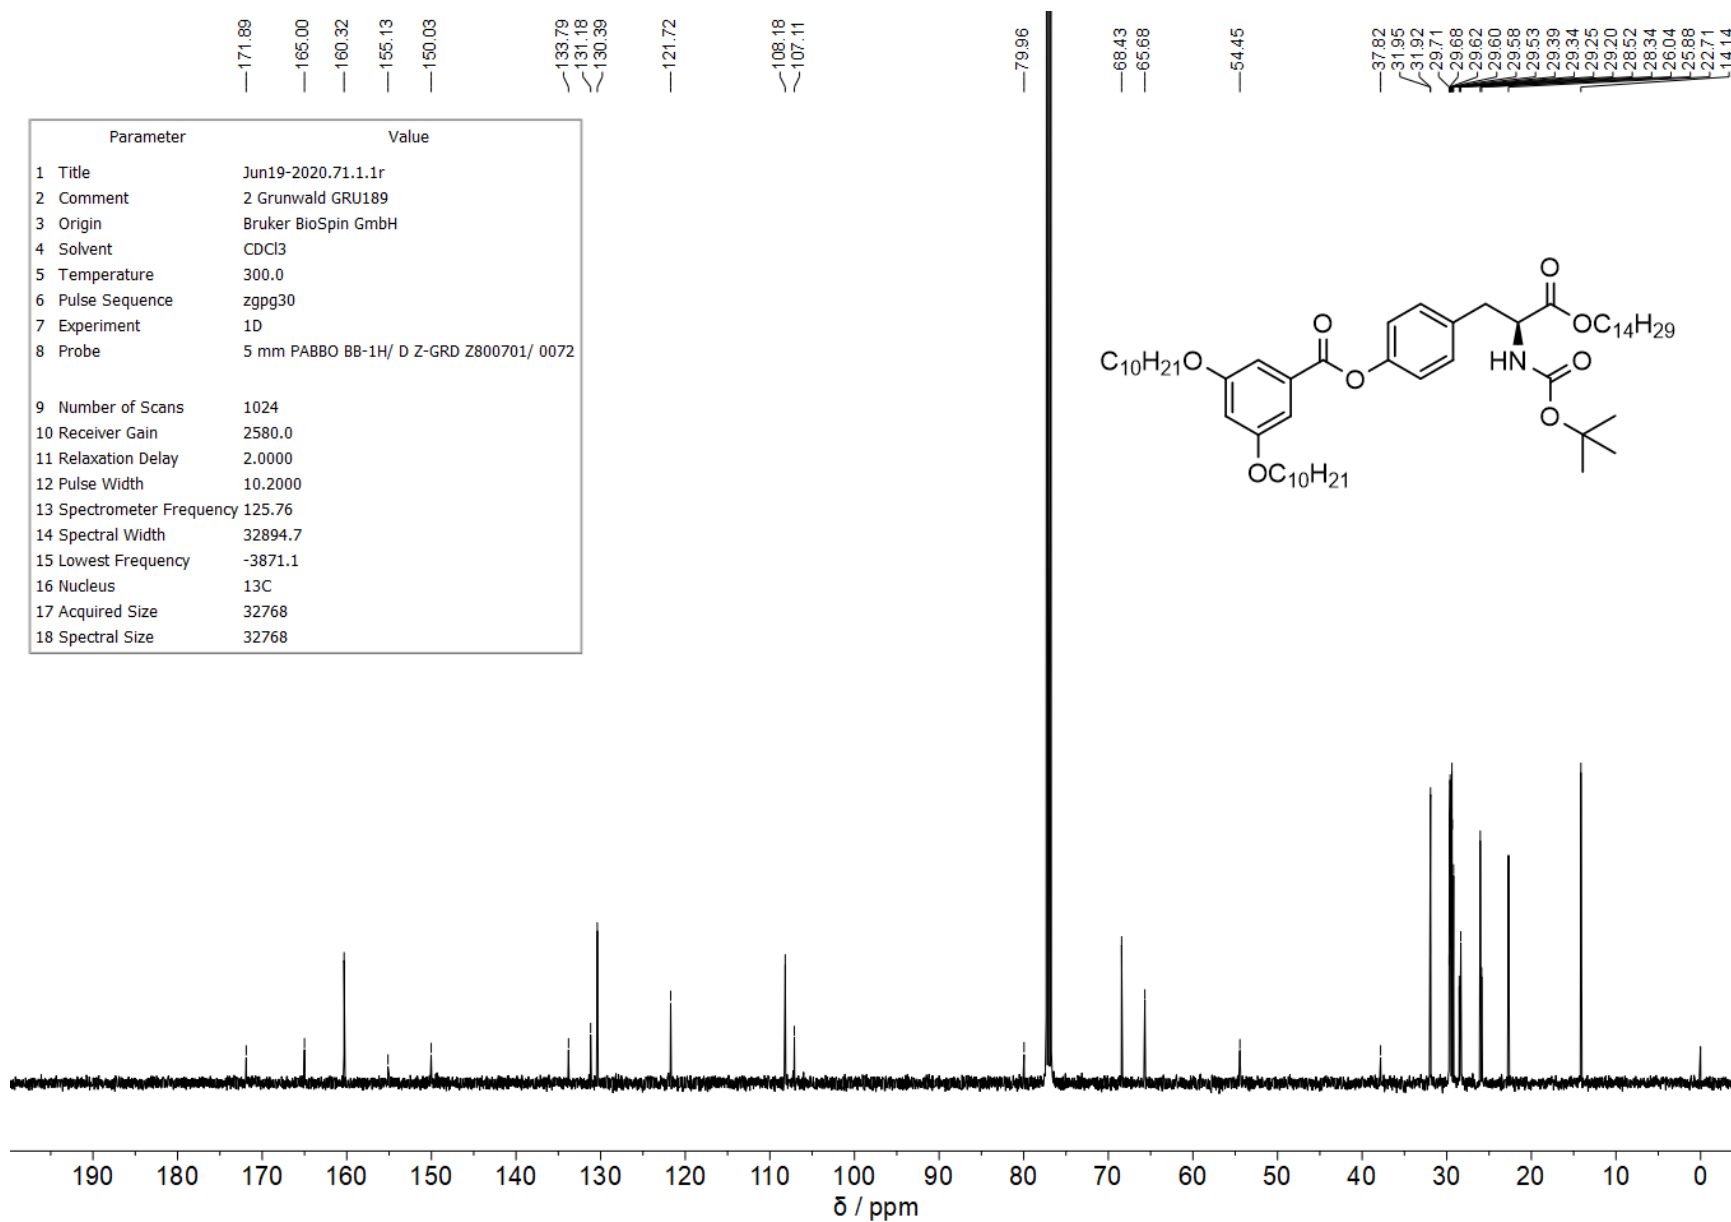

3,5-C<sub>12</sub>TyrC<sub>14</sub>Boc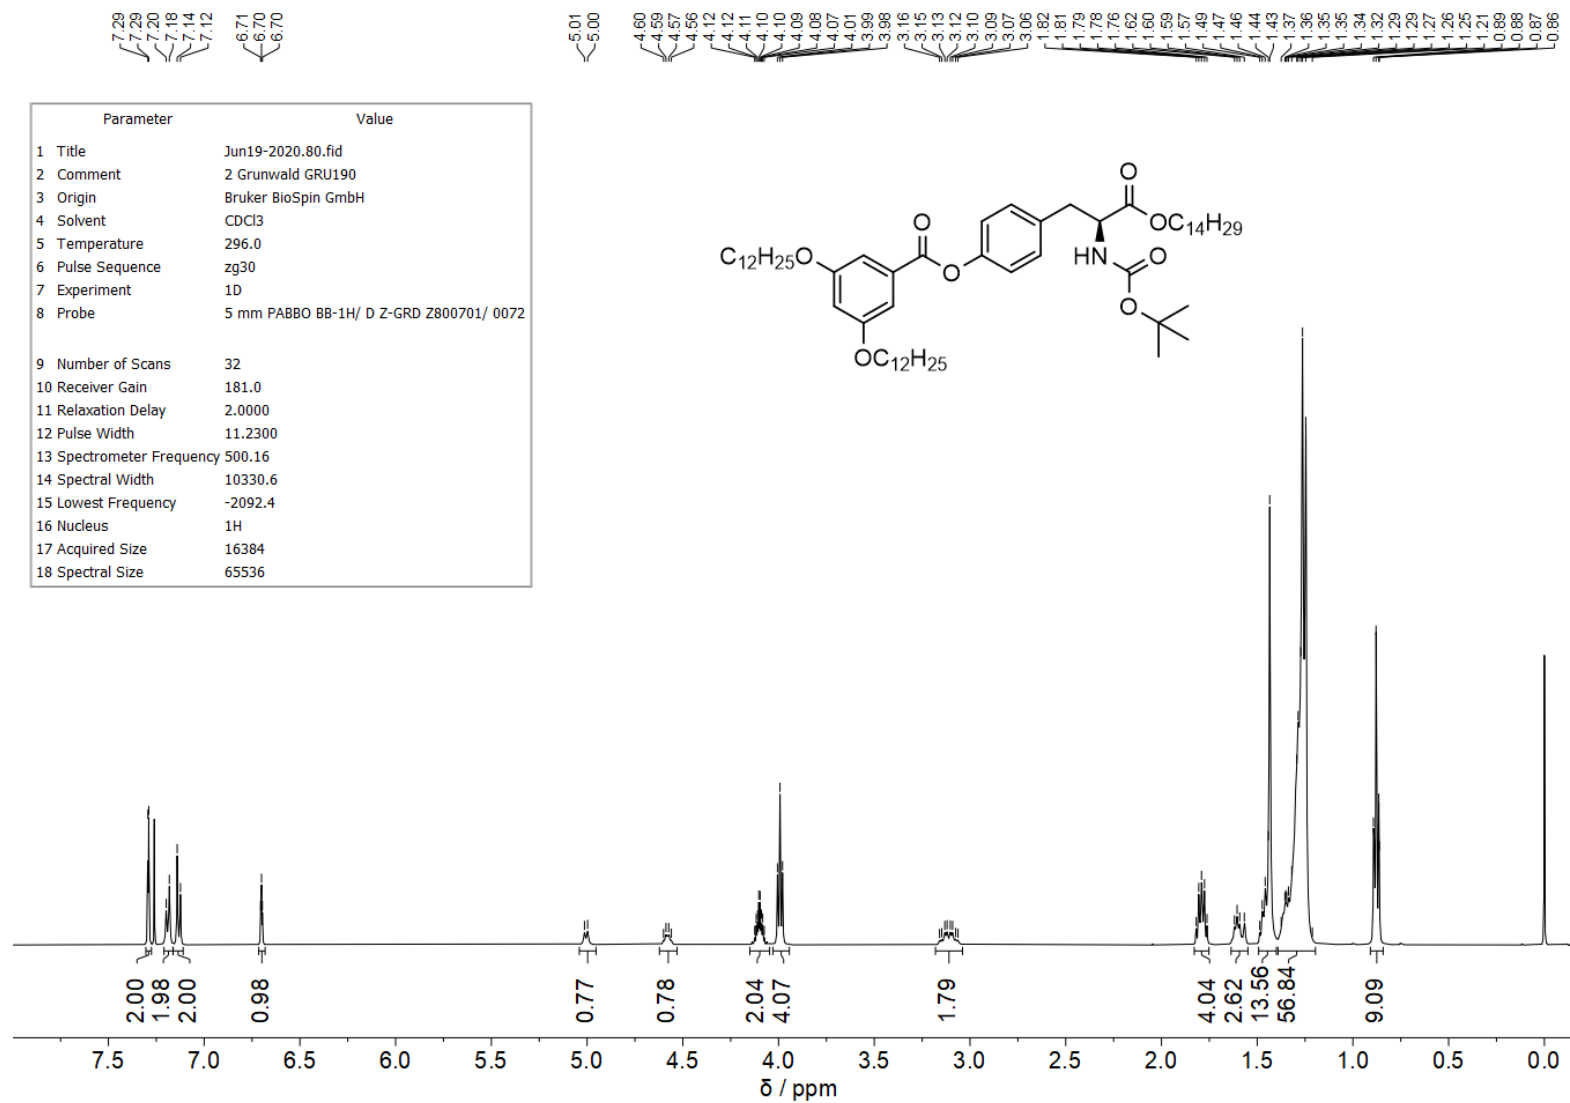

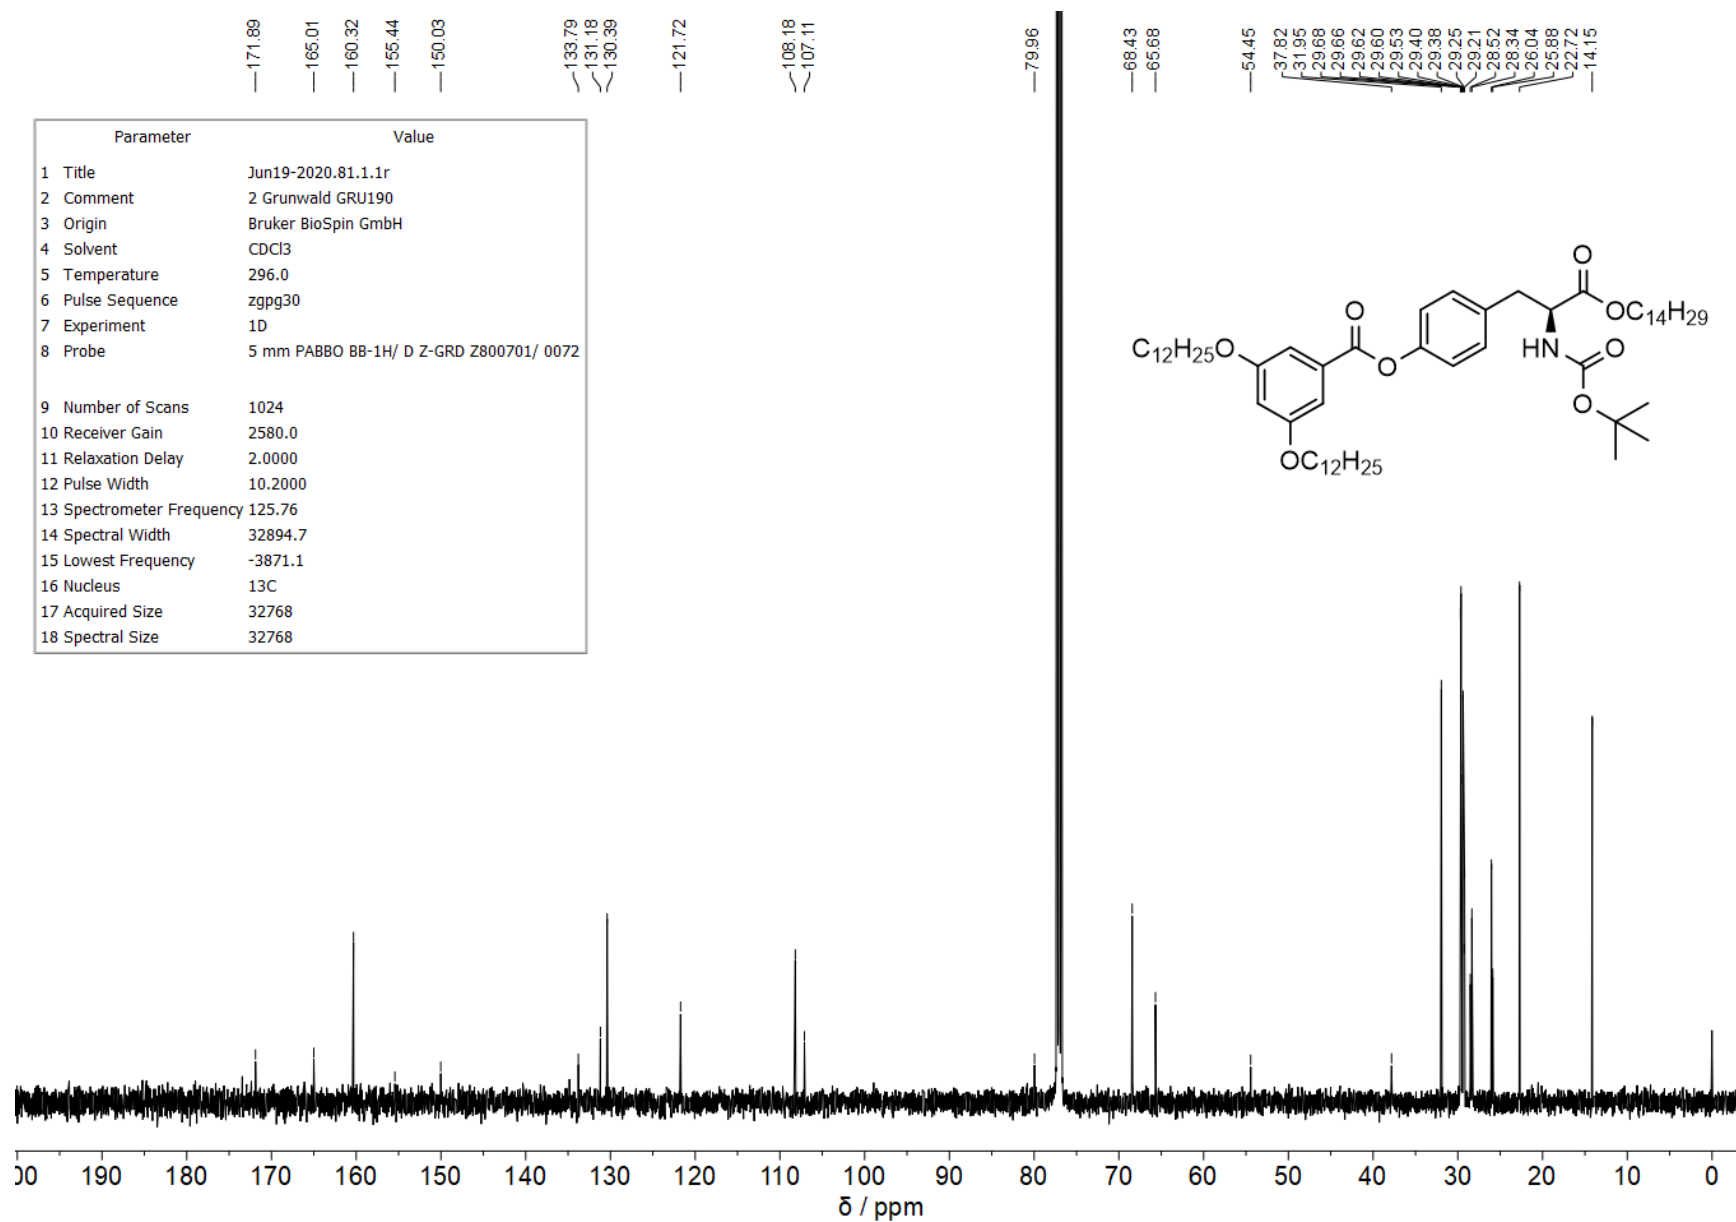

3,5-C<sub>14</sub>TyrC<sub>14</sub>Boc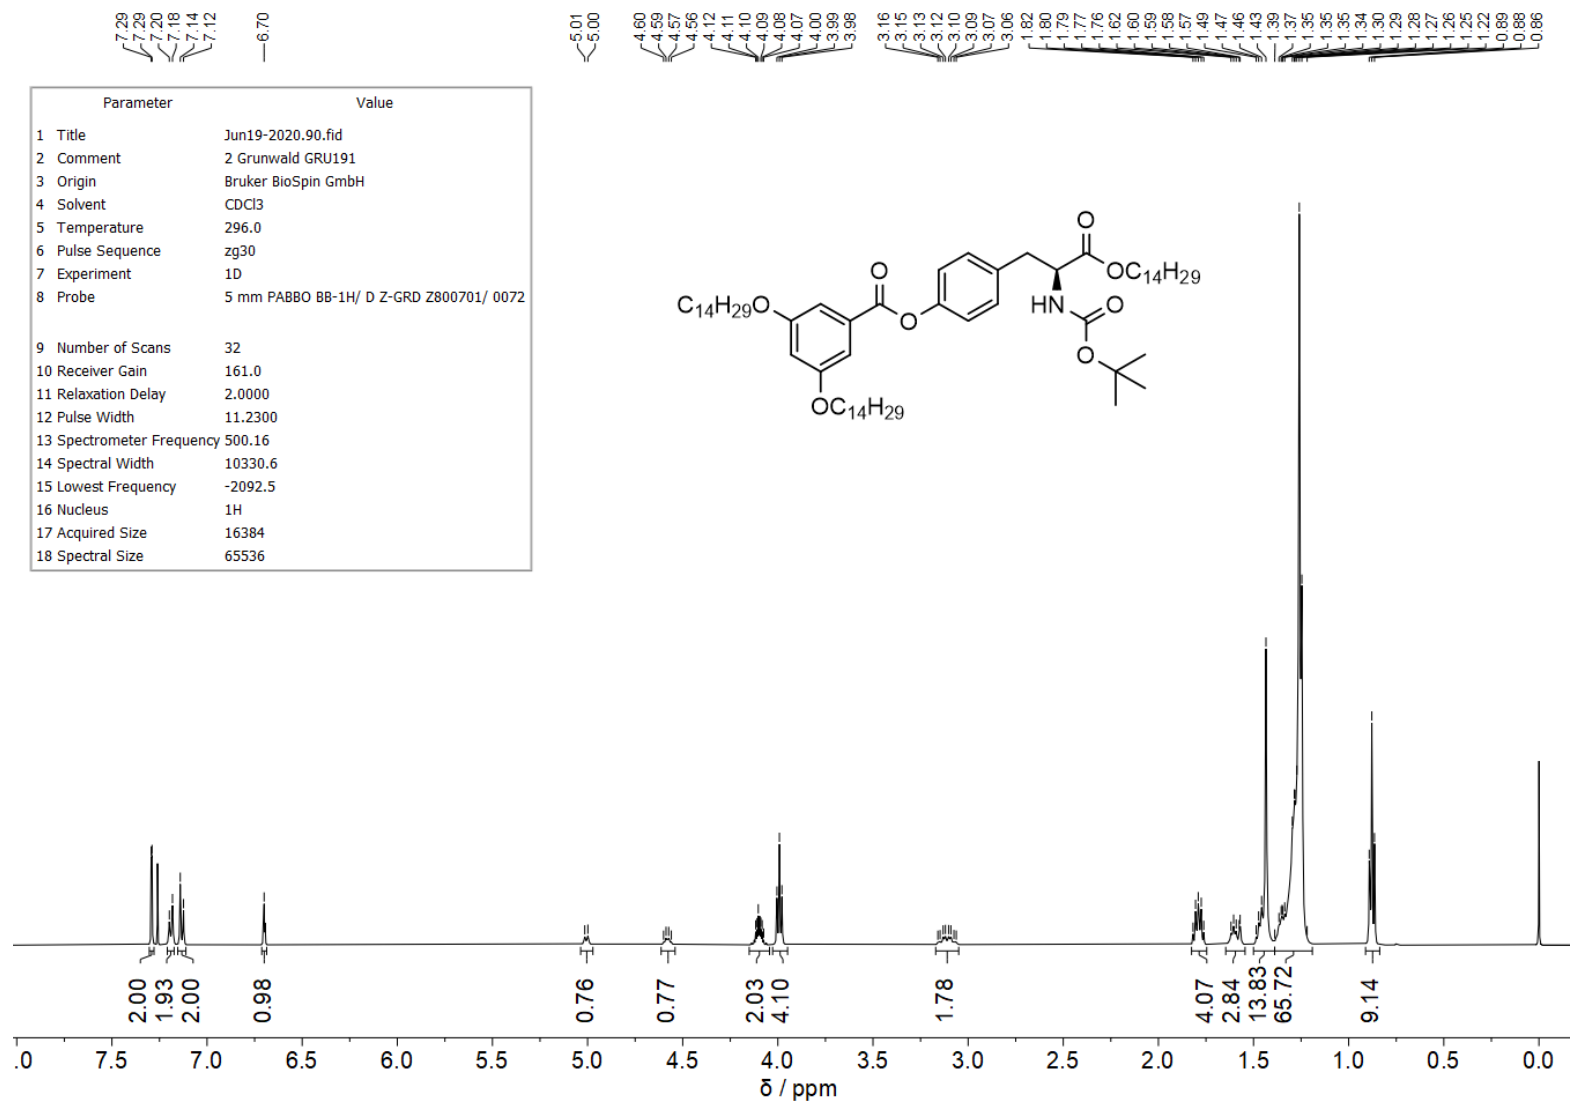

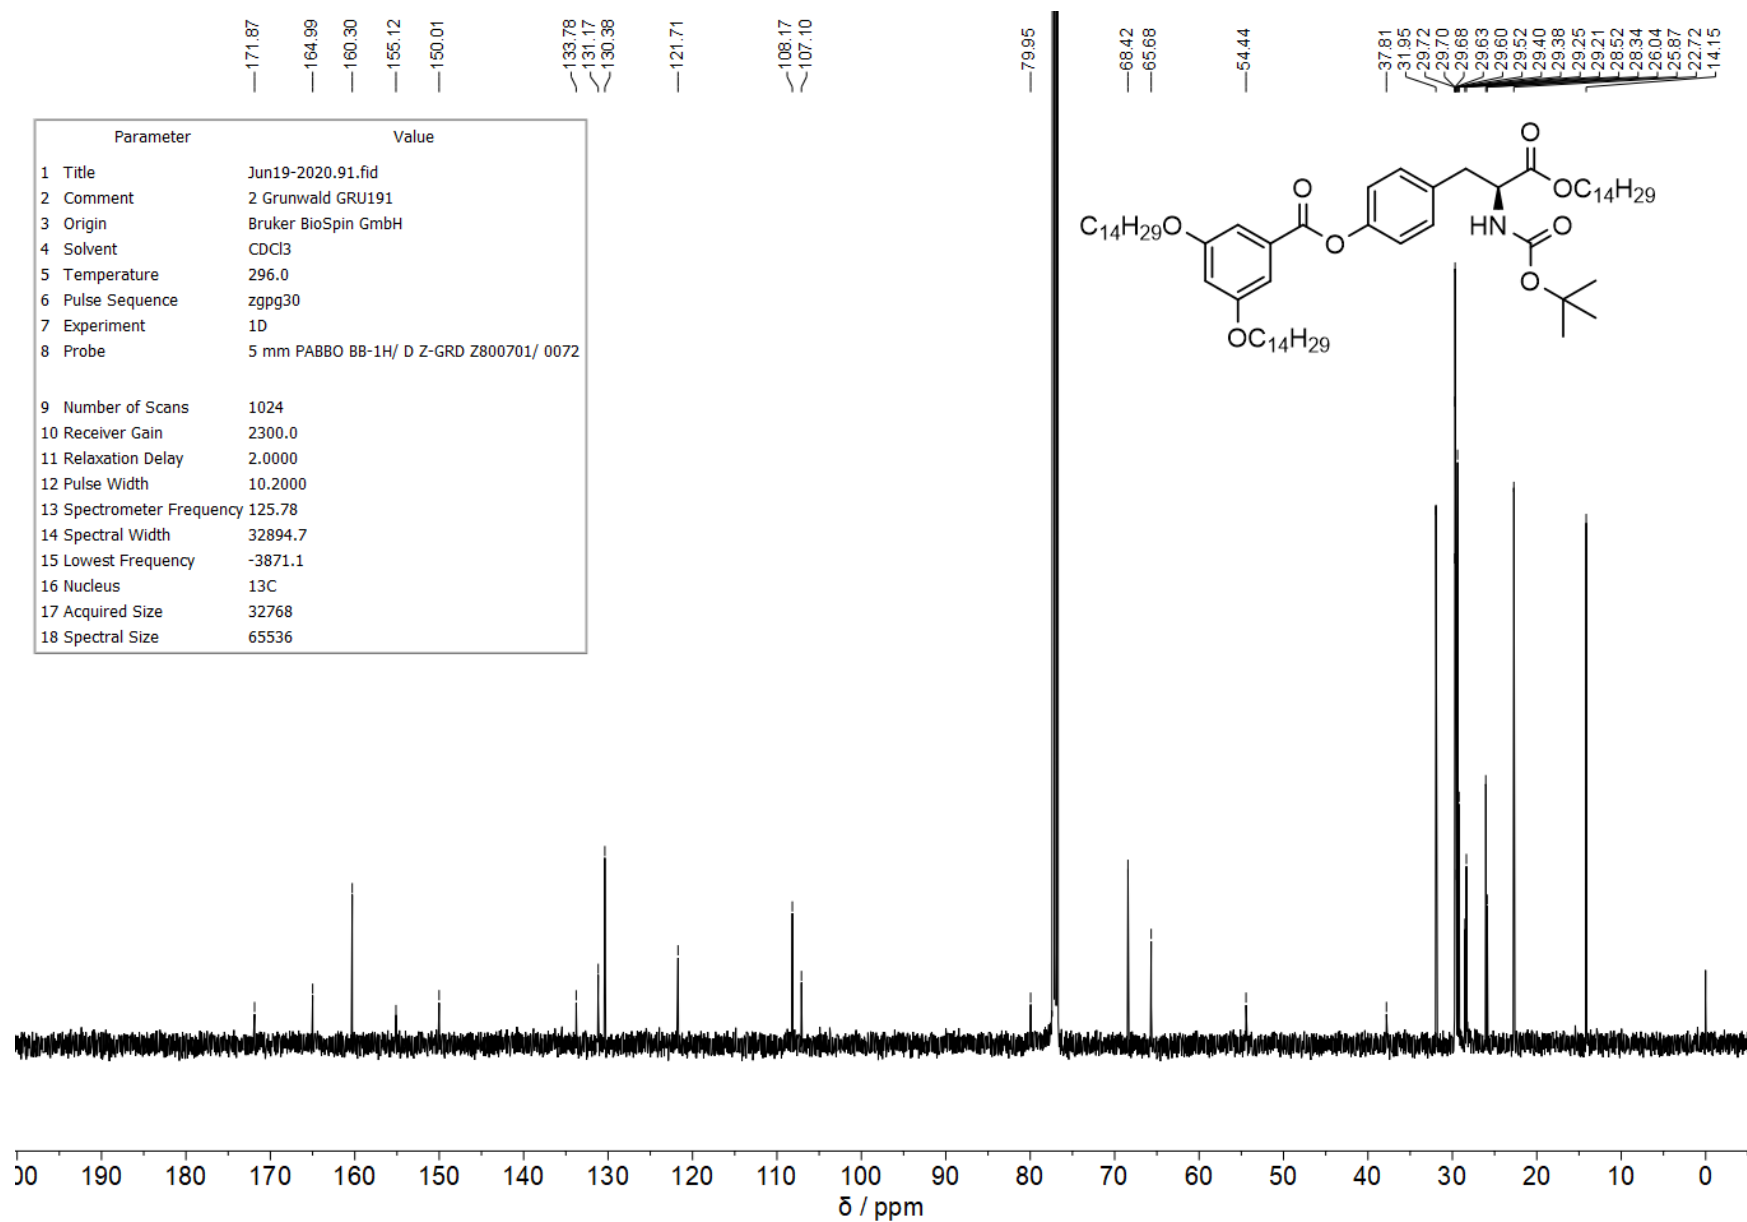

3,4,5-C<sub>10</sub>TyrC<sub>10</sub>Boc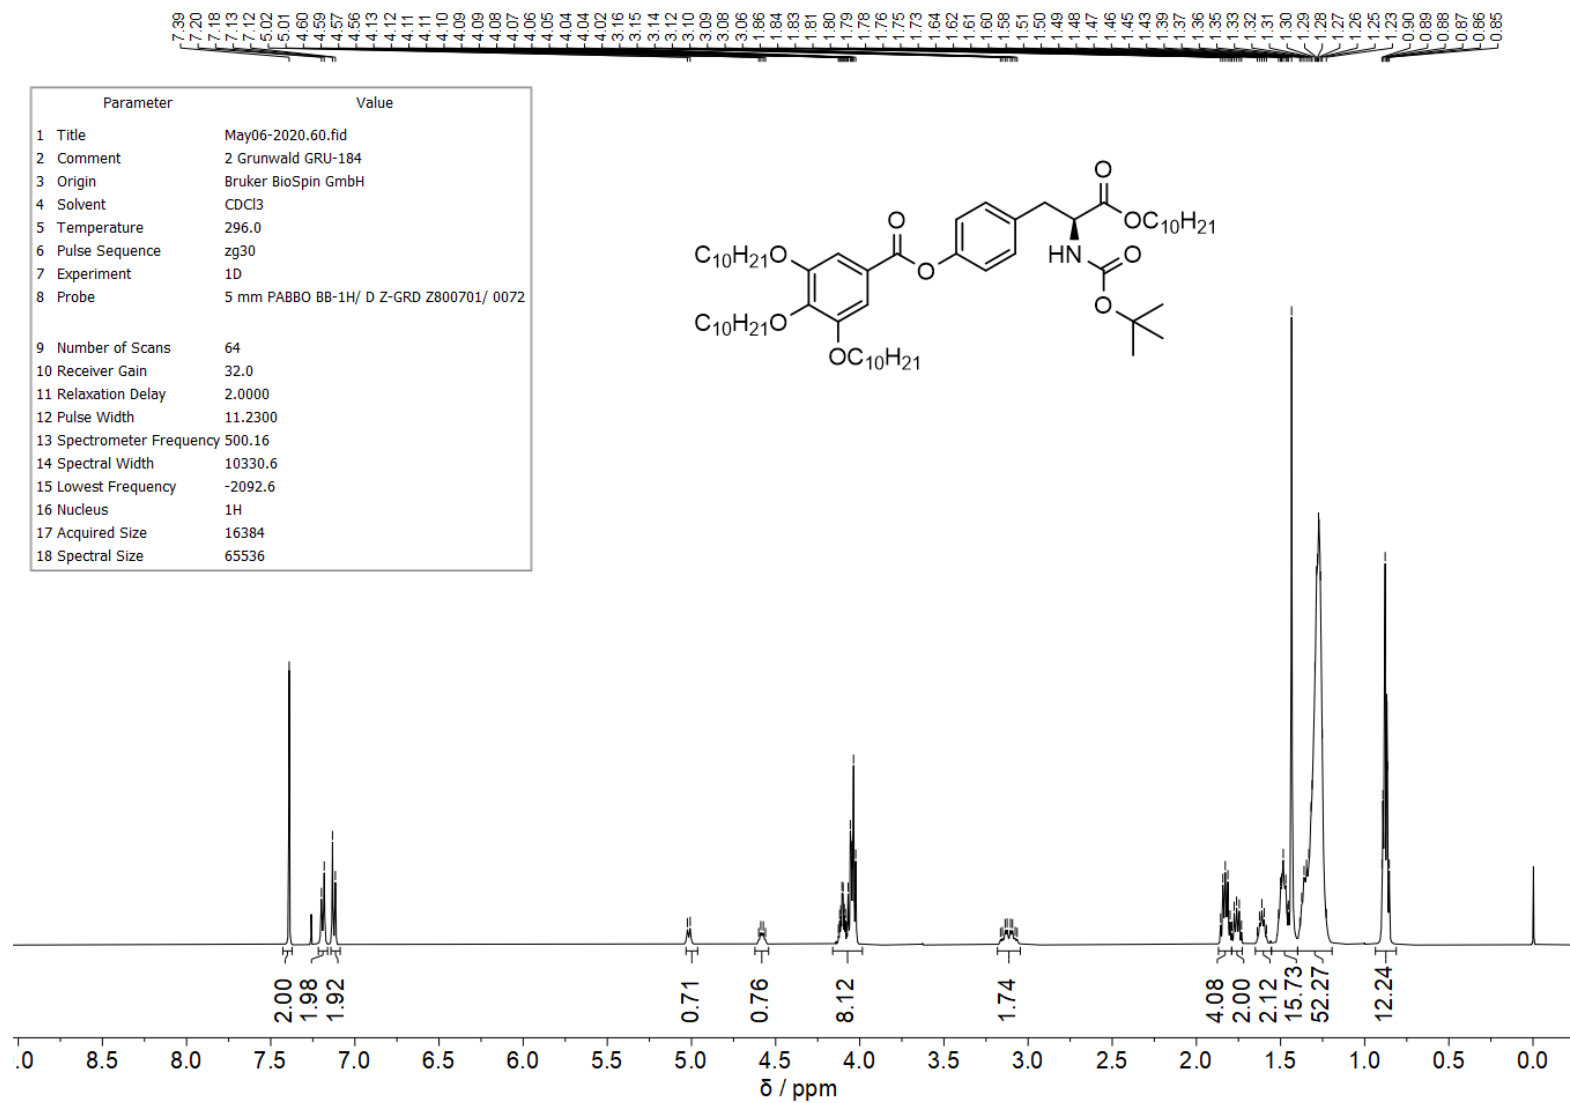

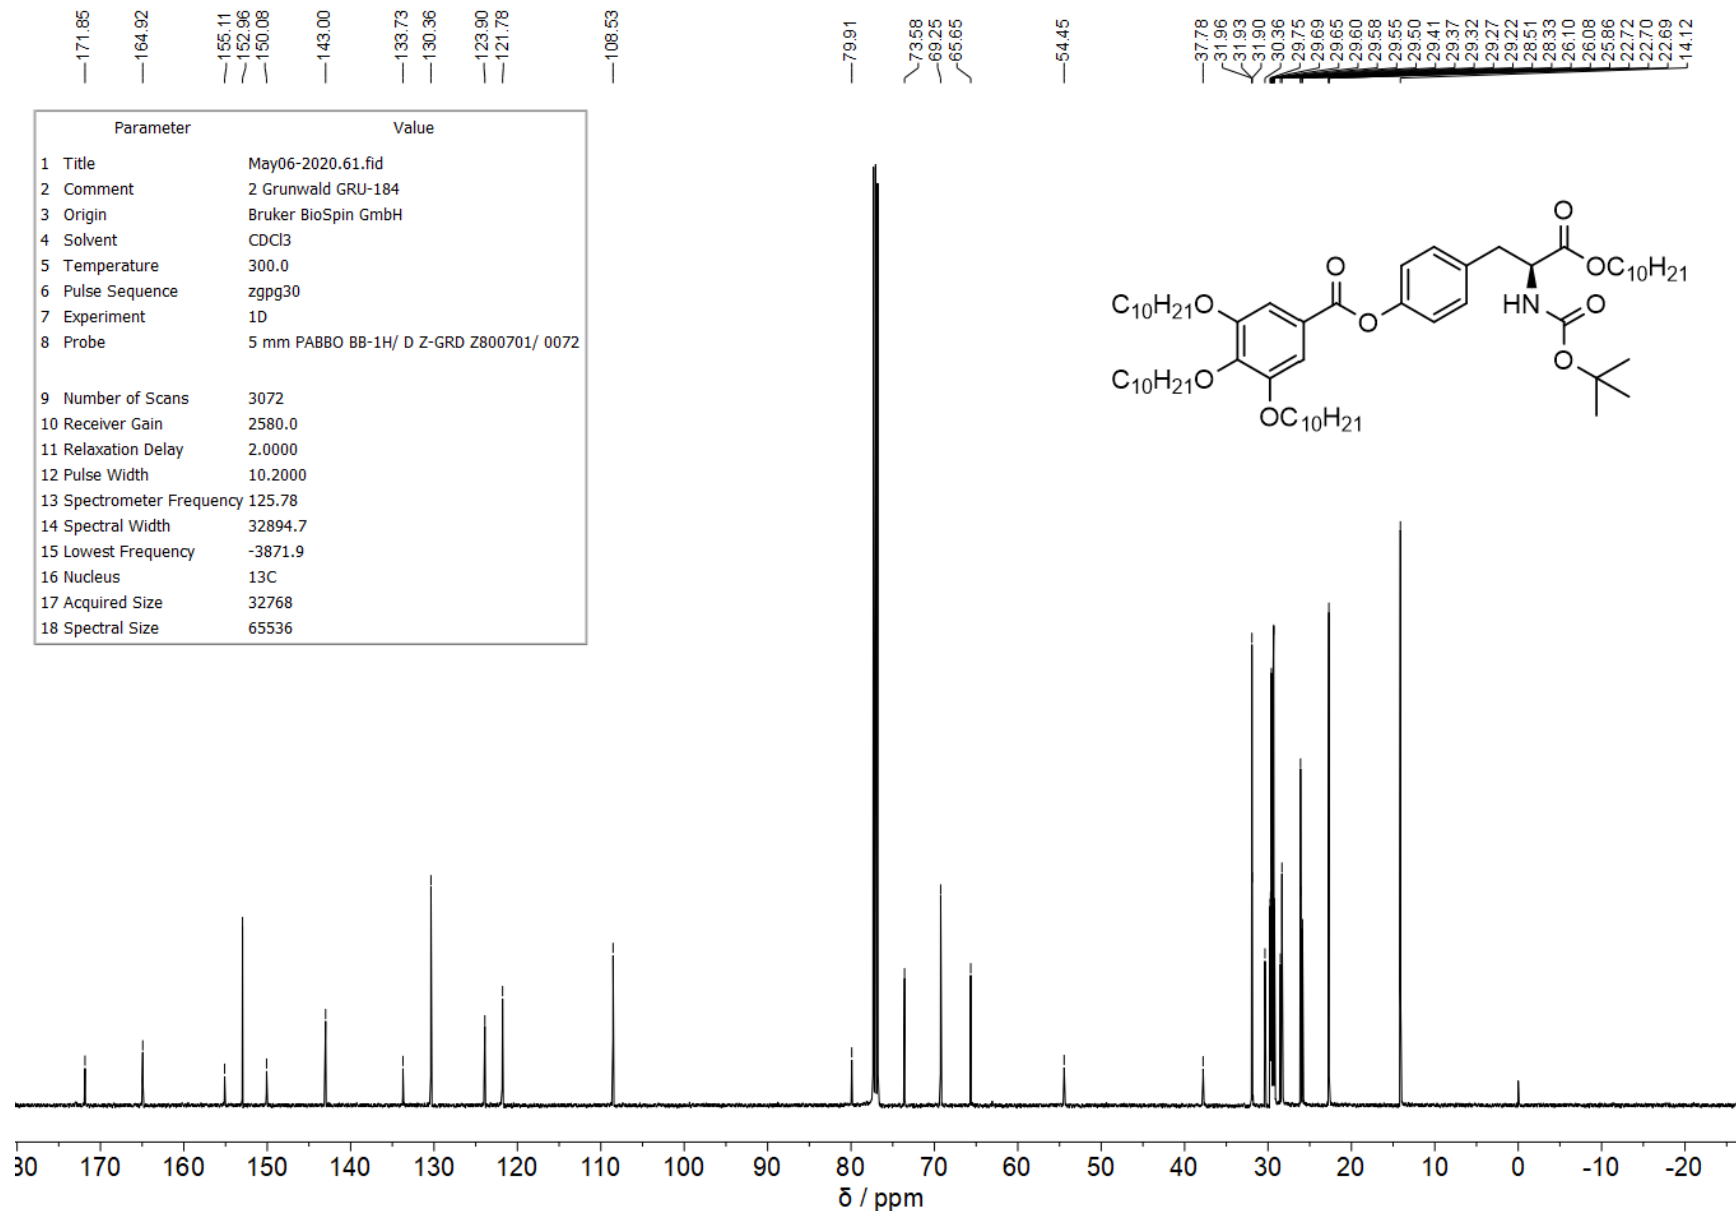

3,4,5-C<sub>12</sub>TyrC<sub>10</sub>Boc

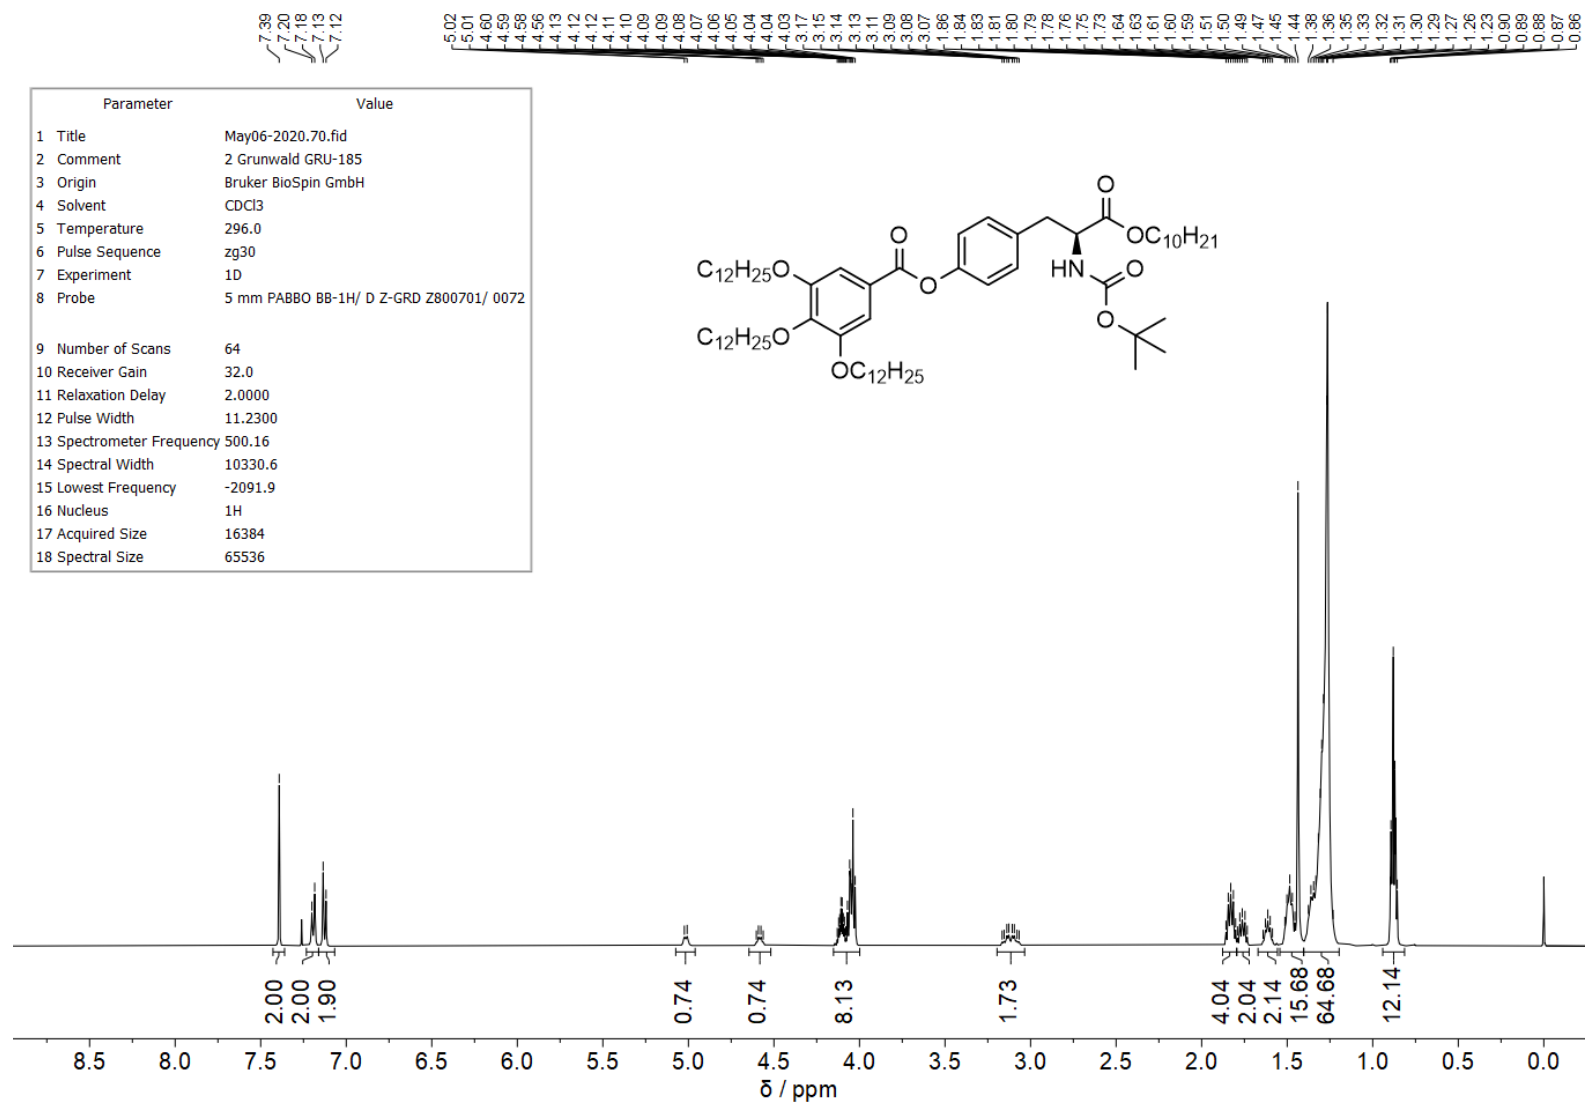

| Parameter                 | Value                                   |
|---------------------------|-----------------------------------------|
| 1 Title                   | May06-2020.70.fid                       |
| 2 Comment                 | 2 Grunwald GRU-185                      |
| 3 Origin                  | Bruker BioSpin GmbH                     |
| 4 Solvent                 | CDCl <sub>3</sub>                       |
| 5 Temperature             | 296.0                                   |
| 6 Pulse Sequence          | zg30                                    |
| 7 Experiment              | 1D                                      |
| 8 Probe                   | 5 mm PABBO BB-1H/ D Z-GRD Z800701/ 0072 |
| 9 Number of Scans         | 64                                      |
| 10 Receiver Gain          | 32.0                                    |
| 11 Relaxation Delay       | 2.0000                                  |
| 12 Pulse Width            | 11.2300                                 |
| 13 Spectrometer Frequency | 500.16                                  |
| 14 Spectral Width         | 10330.6                                 |
| 15 Lowest Frequency       | -2091.9                                 |
| 16 Nucleus                | <sup>1</sup> H                          |
| 17 Acquired Size          | 16384                                   |
| 18 Spectral Size          | 65536                                   |



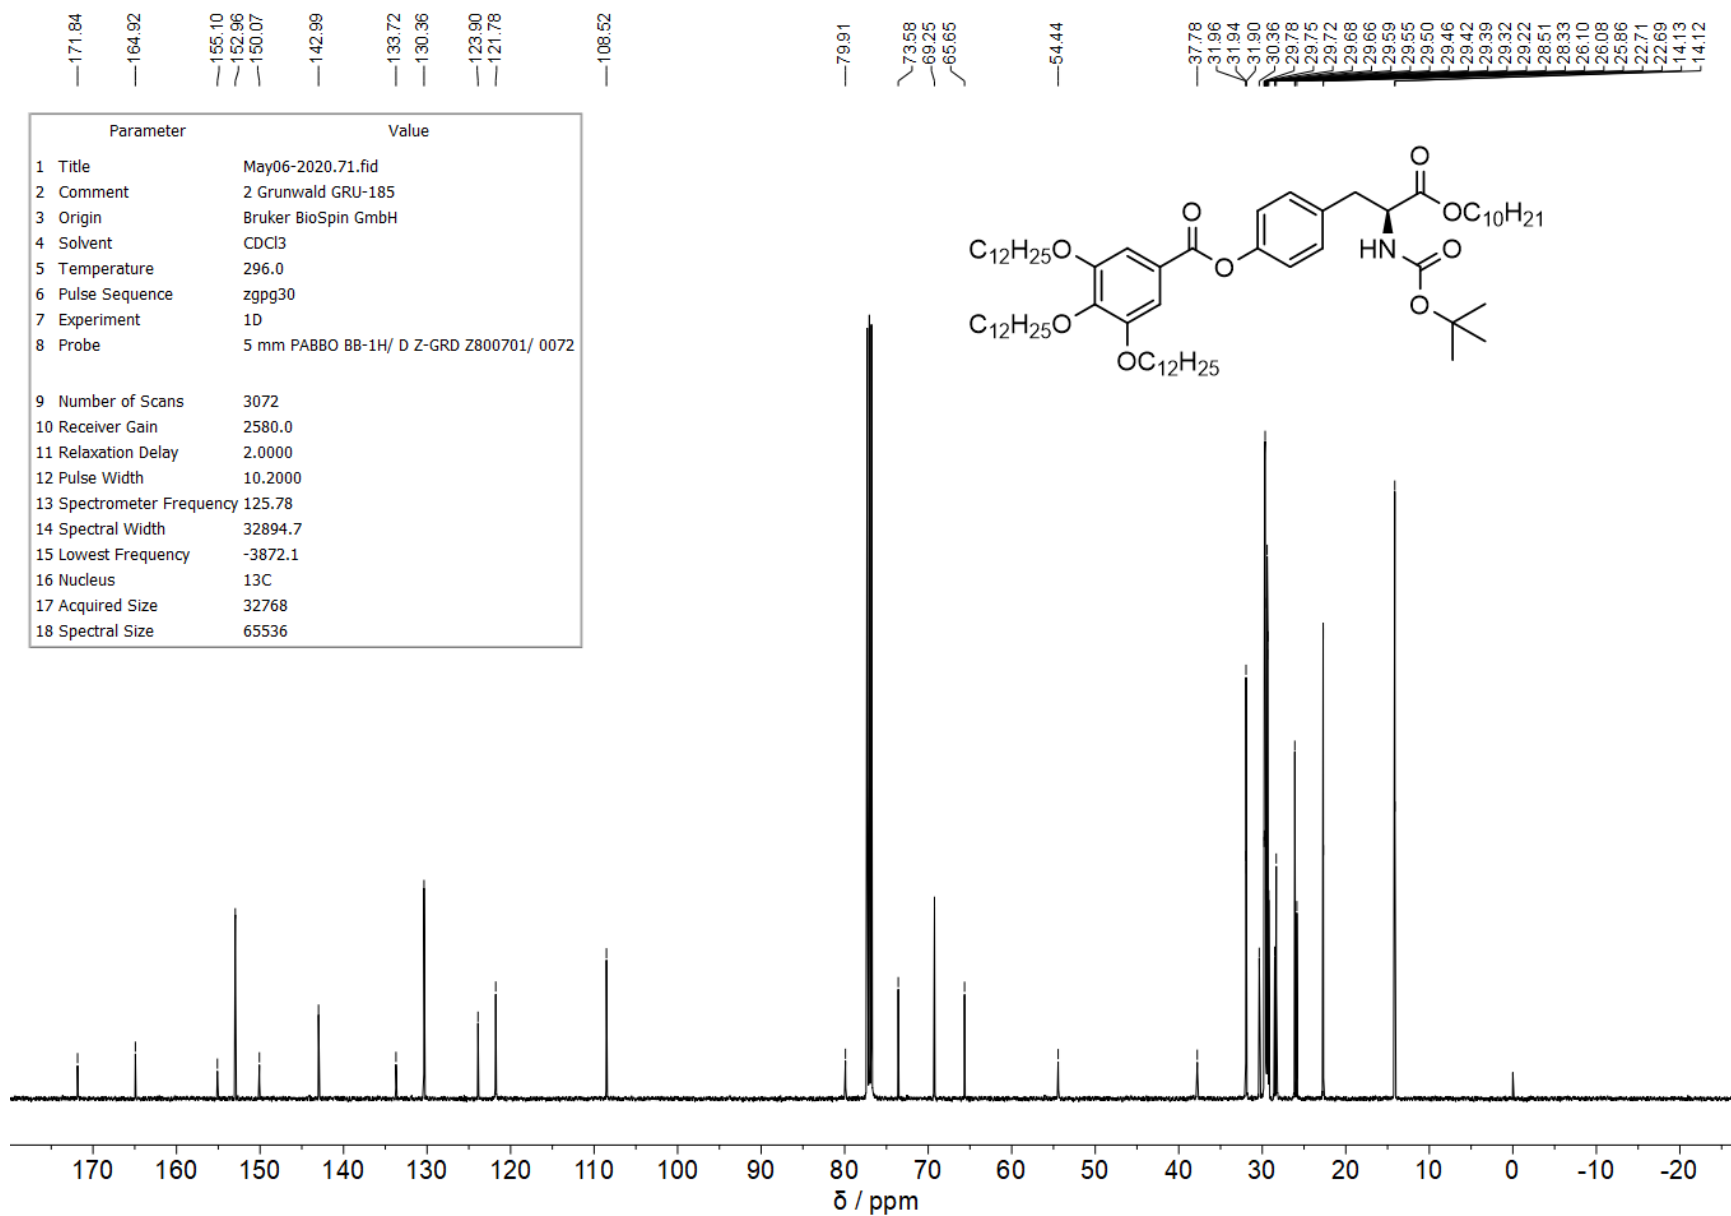

| Parameter                 | Value                                   |
|---------------------------|-----------------------------------------|
| 1 Title                   | May06-2020.71.fid                       |
| 2 Comment                 | 2 Grunwald GRU-185                      |
| 3 Origin                  | Bruker BioSpin GmbH                     |
| 4 Solvent                 | CDCl3                                   |
| 5 Temperature             | 296.0                                   |
| 6 Pulse Sequence          | zgpg30                                  |
| 7 Experiment              | 1D                                      |
| 8 Probe                   | 5 mm PABBO BB-1H/ D Z-GRD Z800701/ 0072 |
| 9 Number of Scans         | 3072                                    |
| 10 Receiver Gain          | 2580.0                                  |
| 11 Relaxation Delay       | 2.0000                                  |
| 12 Pulse Width            | 10.2000                                 |
| 13 Spectrometer Frequency | 125.78                                  |
| 14 Spectral Width         | 32894.7                                 |
| 15 Lowest Frequency       | -3872.1                                 |
| 16 Nucleus                | 13C                                     |
| 17 Acquired Size          | 32768                                   |
| 18 Spectral Size          | 65536                                   |

3,4,5-C14TyrC10Boc

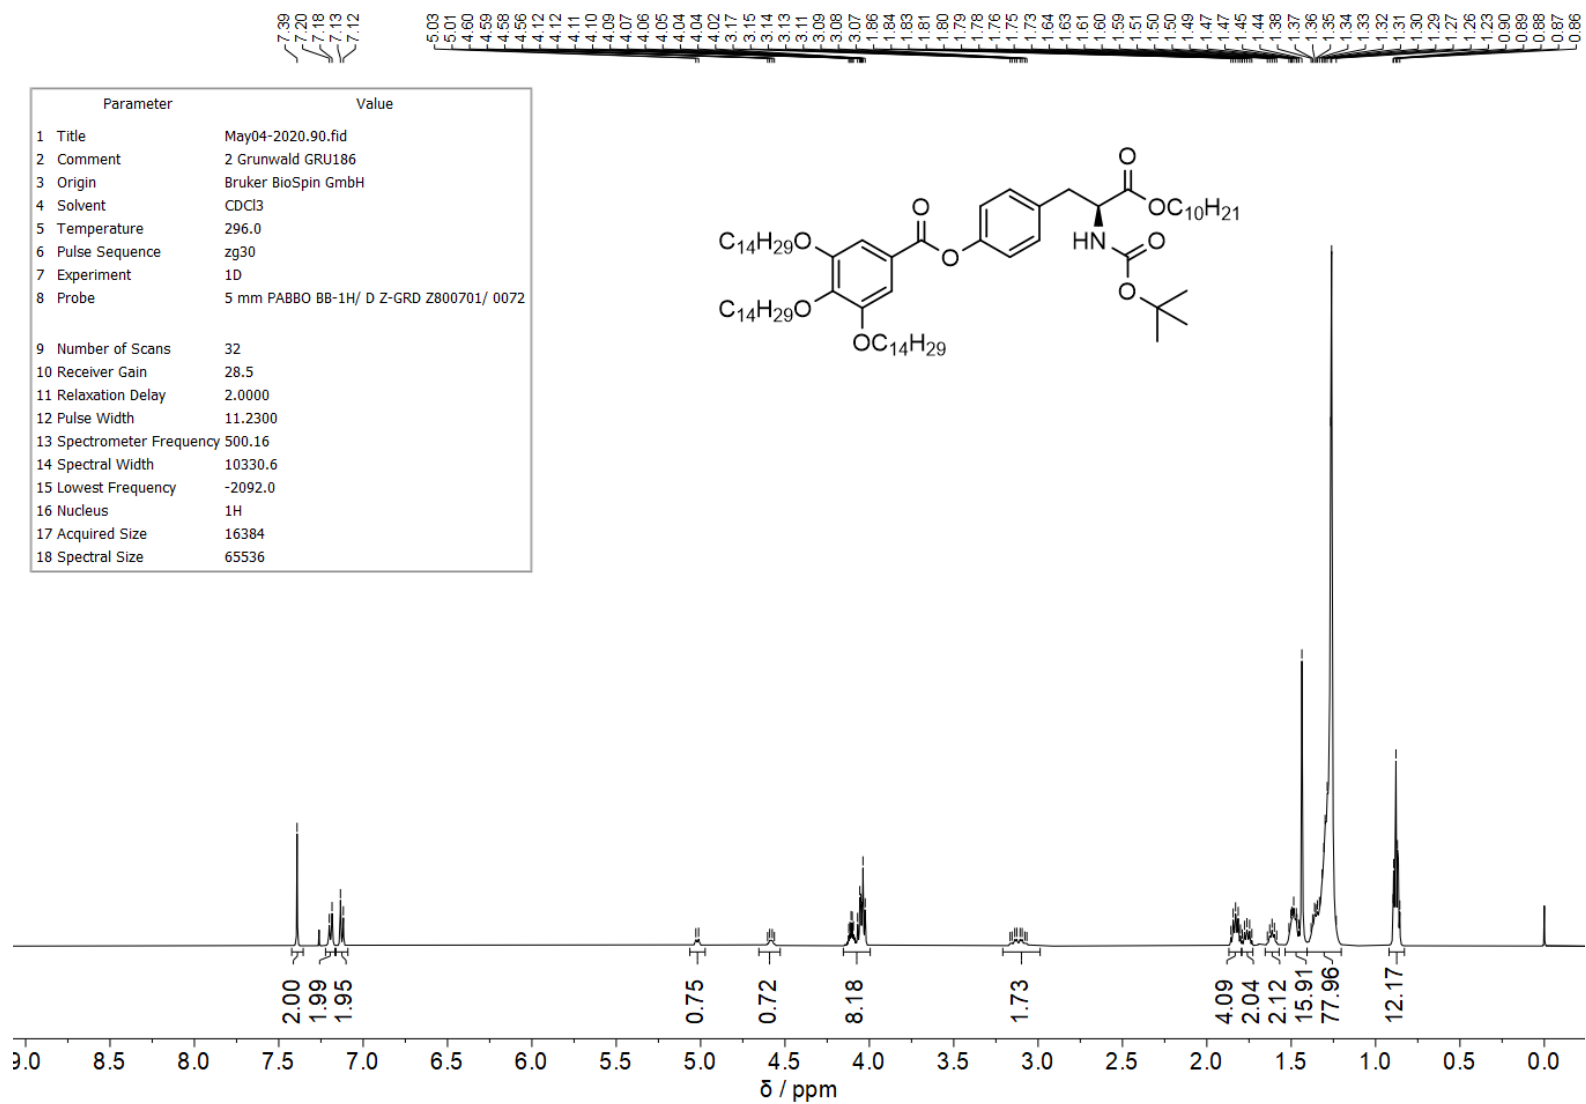

| Parameter                 | Value                                   |
|---------------------------|-----------------------------------------|
| 1 Title                   | May04-2020.90.fid                       |
| 2 Comment                 | 2 Grunwald GRU186                       |
| 3 Origin                  | Bruker BioSpin GmbH                     |
| 4 Solvent                 | CDCl3                                   |
| 5 Temperature             | 296.0                                   |
| 6 Pulse Sequence          | zg30                                    |
| 7 Experiment              | 1D                                      |
| 8 Probe                   | 5 mm PABBO BB-1H/ D Z-GRD Z800701/ 0072 |
| 9 Number of Scans         | 32                                      |
| 10 Receiver Gain          | 28.5                                    |
| 11 Relaxation Delay       | 2.0000                                  |
| 12 Pulse Width            | 11.2300                                 |
| 13 Spectrometer Frequency | 500.16                                  |
| 14 Spectral Width         | 10330.6                                 |
| 15 Lowest Frequency       | -2092.0                                 |
| 16 Nucleus                | 1H                                      |
| 17 Acquired Size          | 16384                                   |
| 18 Spectral Size          | 65536                                   |

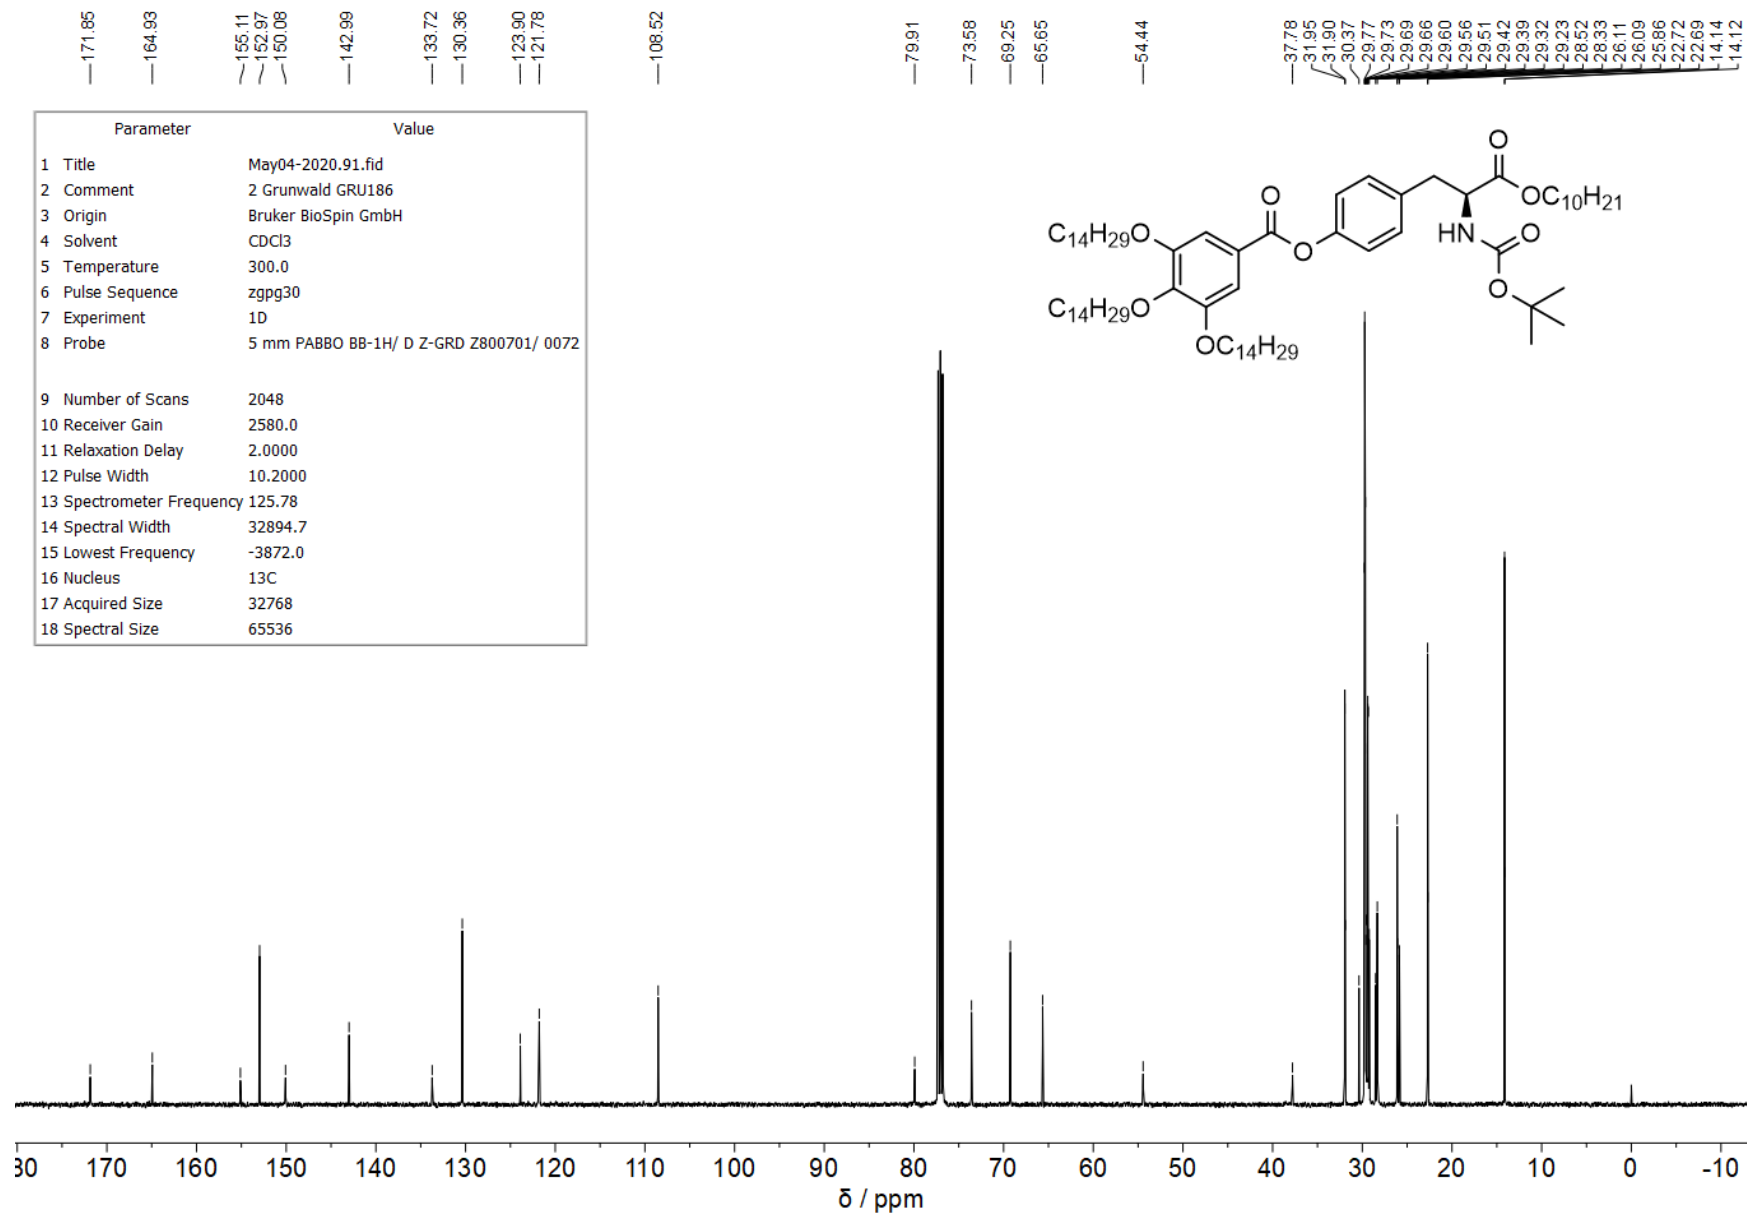

3,4,5-C<sub>10</sub>TyrC<sub>12</sub>Boc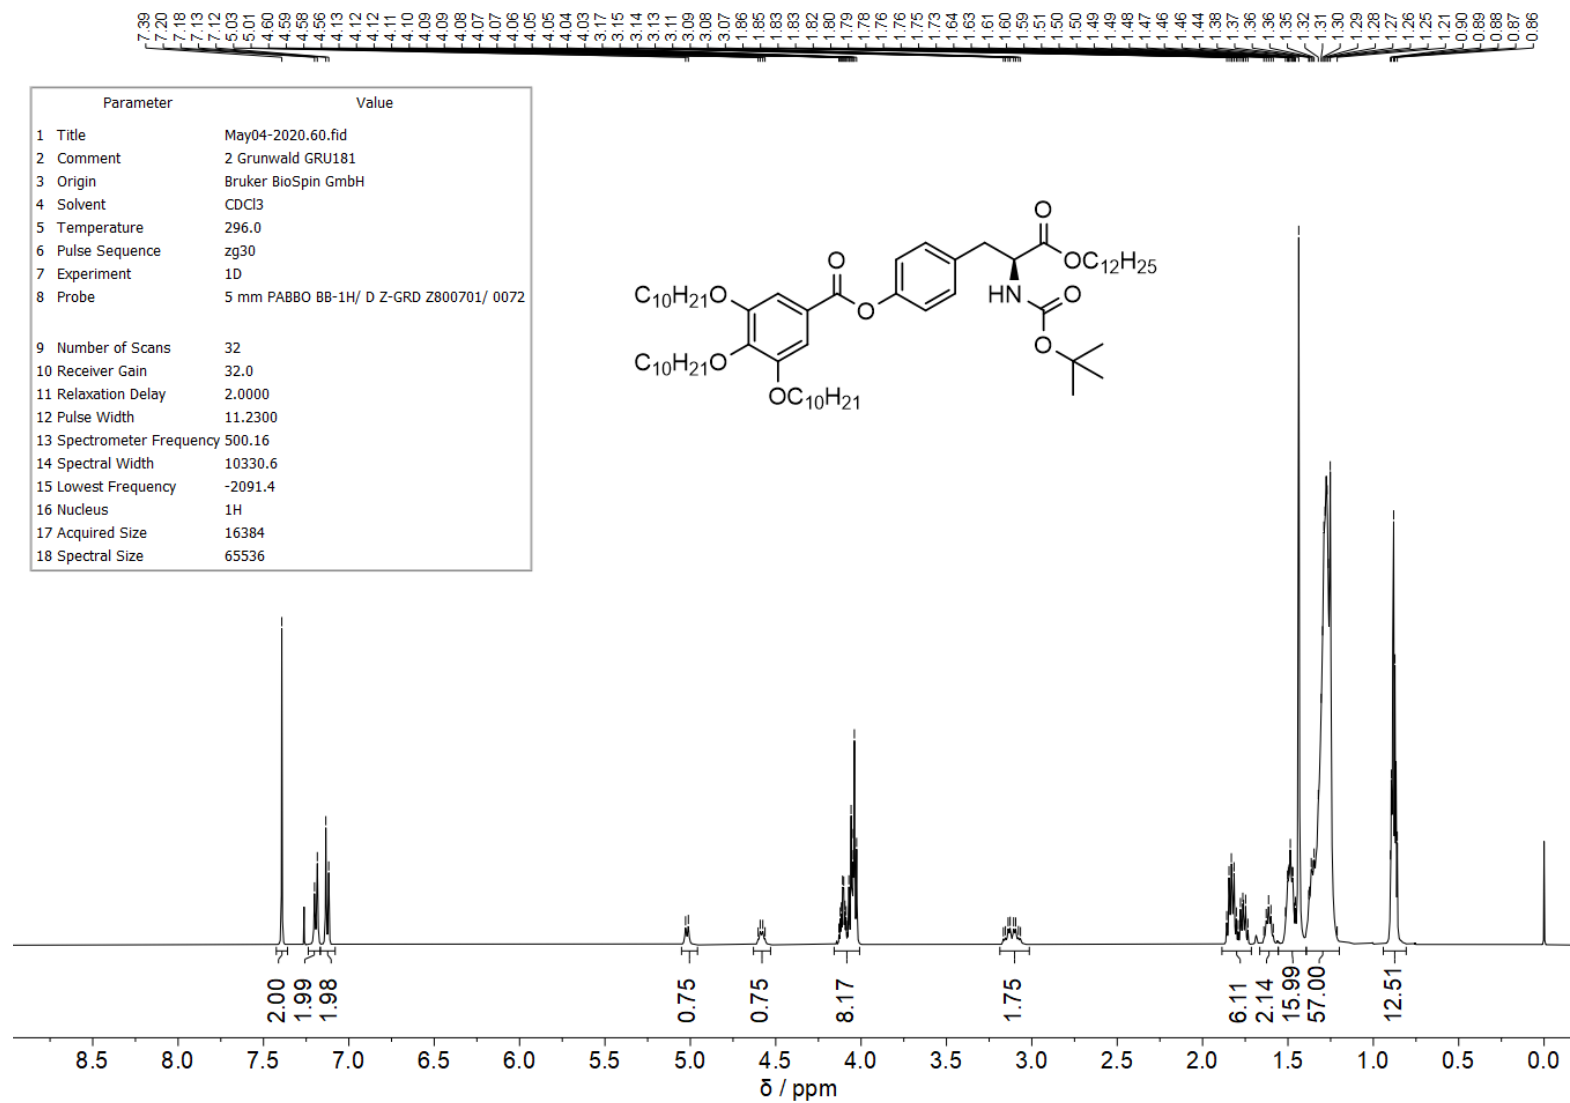

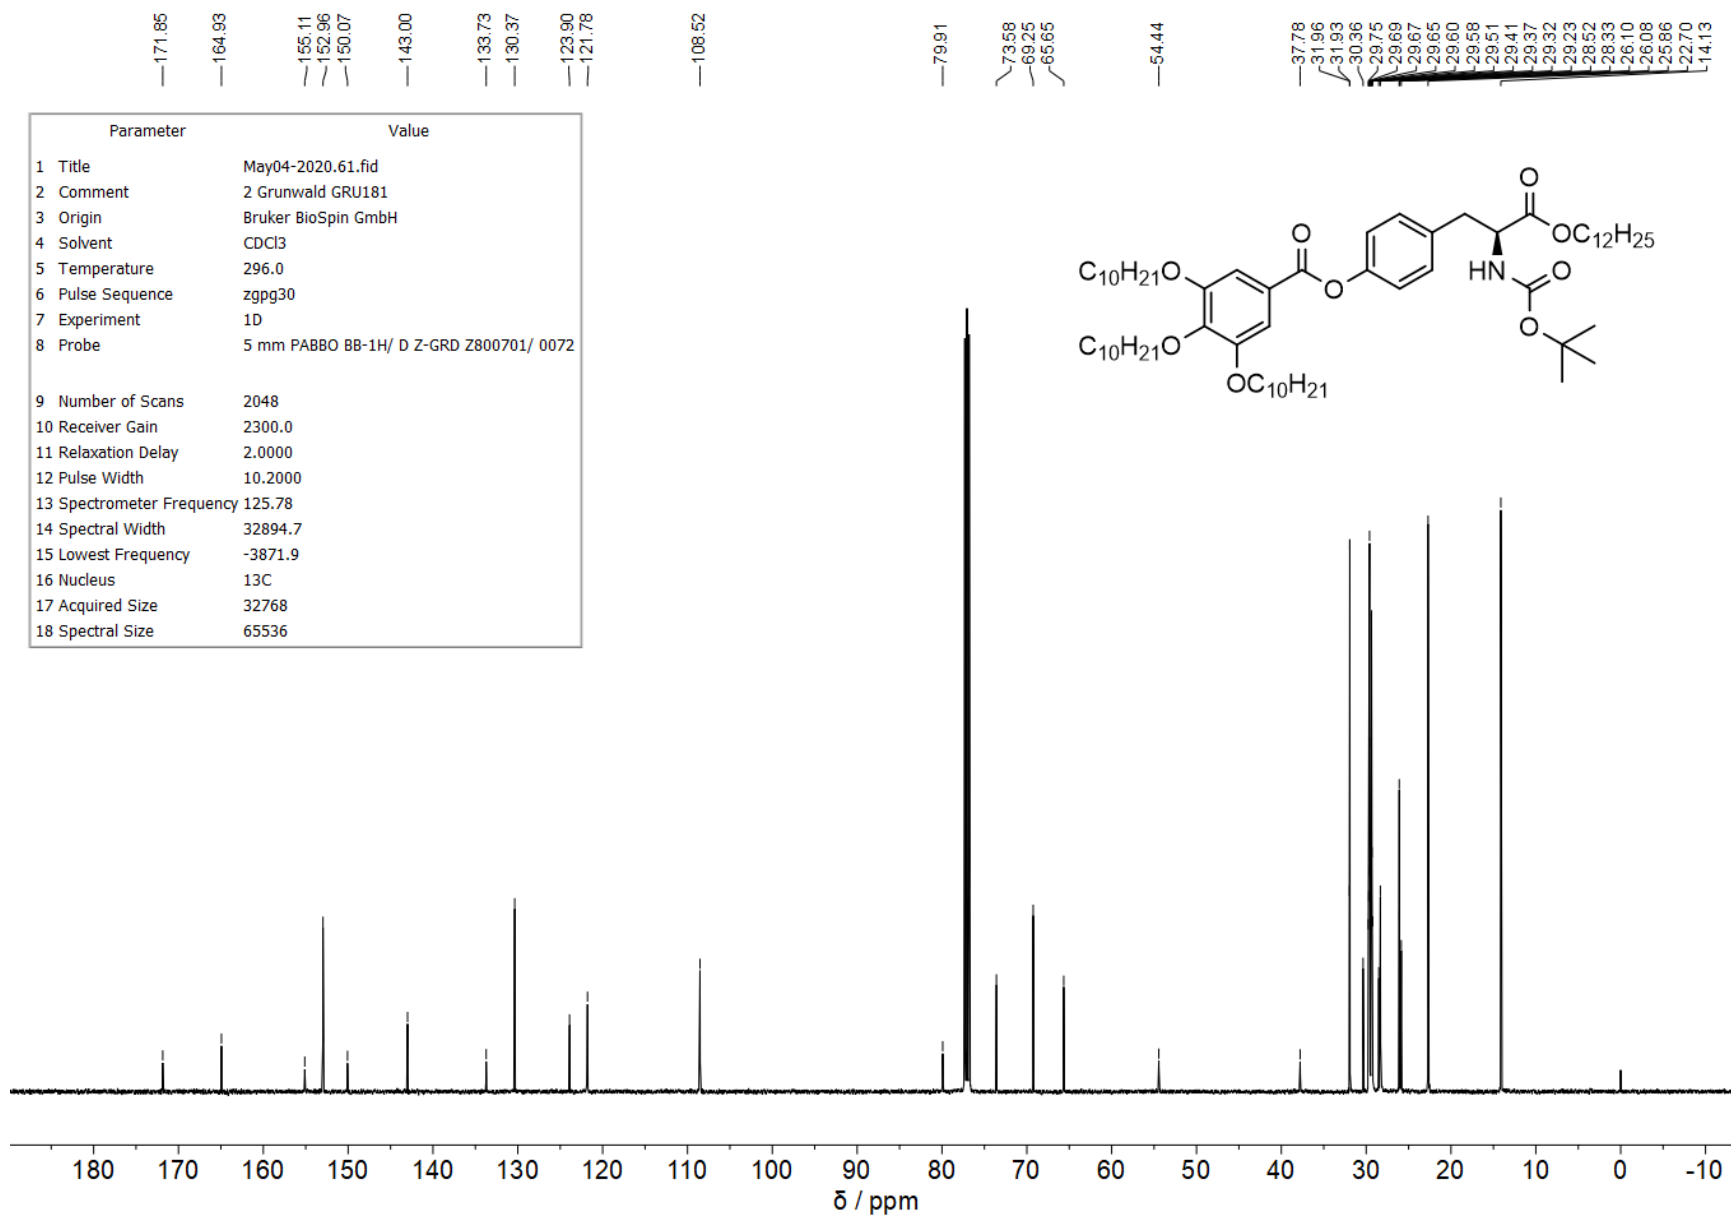

| Parameter                 | Value                                   |
|---------------------------|-----------------------------------------|
| 1 Title                   | May04-2020.61.fid                       |
| 2 Comment                 | 2 Grunwald GRU181                       |
| 3 Origin                  | Bruker BioSpin GmbH                     |
| 4 Solvent                 | CDCl3                                   |
| 5 Temperature             | 296.0                                   |
| 6 Pulse Sequence          | zgpg30                                  |
| 7 Experiment              | 1D                                      |
| 8 Probe                   | 5 mm PABBO BB-1H/ D Z-GRD Z800701/ 0072 |
| 9 Number of Scans         | 2048                                    |
| 10 Receiver Gain          | 2300.0                                  |
| 11 Relaxation Delay       | 2.0000                                  |
| 12 Pulse Width            | 10.2000                                 |
| 13 Spectrometer Frequency | 125.78                                  |
| 14 Spectral Width         | 32894.7                                 |
| 15 Lowest Frequency       | -3871.9                                 |
| 16 Nucleus                | 13C                                     |
| 17 Acquired Size          | 32768                                   |
| 18 Spectral Size          | 65536                                   |

3,4,5-C<sub>12</sub>TyrC<sub>12</sub>Boc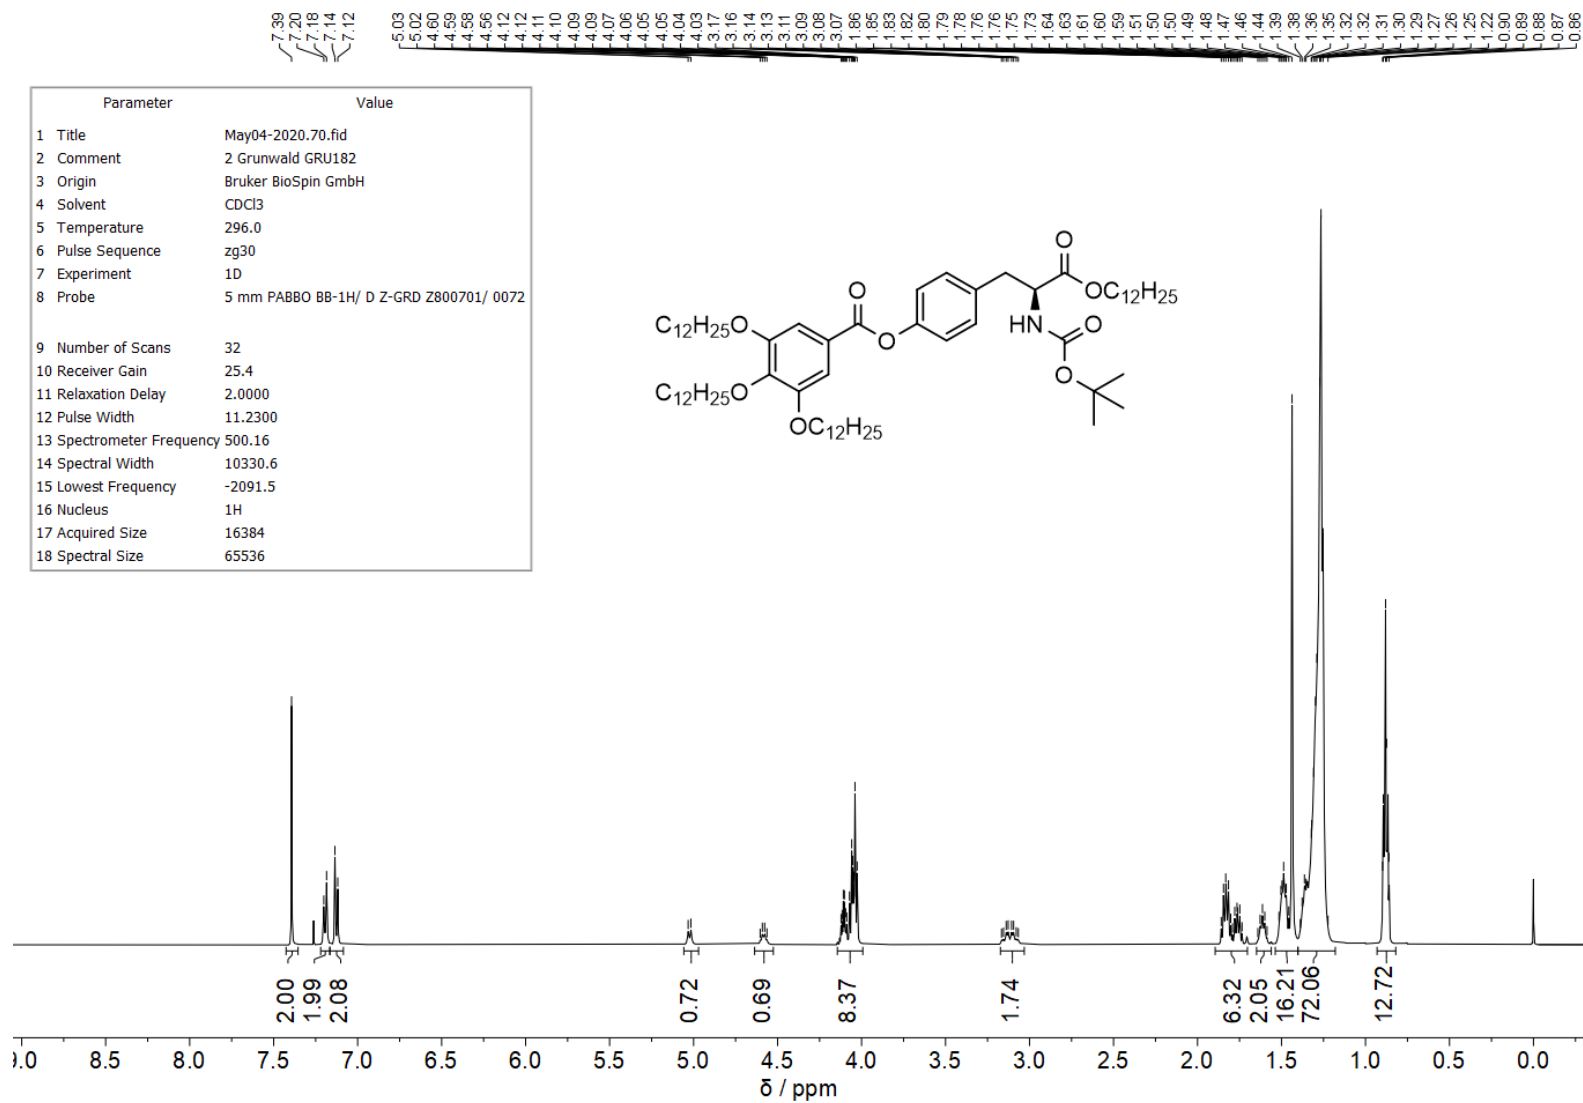

171.85 164.93 155.11 152.97 150.08 143.00 133.73 130.36 123.90 121.78 108.52 79.90 73.58 69.25 65.65 54.45 37.78 31.97 31.95 31.93 30.37 29.78 29.76 29.72 29.68 29.66 29.60 29.51 29.42 29.39 29.37 29.32 29.23 28.52 28.53 26.11 26.09 25.87 22.71 14.13

| Parameter                 | Value                                   |
|---------------------------|-----------------------------------------|
| 1 Title                   | May04-2020.71.fid                       |
| 2 Comment                 | 2 Grunwald GRU182                       |
| 3 Origin                  | Bruker BioSpin GmbH                     |
| 4 Solvent                 | CDCl3                                   |
| 5 Temperature             | 296.0                                   |
| 6 Pulse Sequence          | zgpg30                                  |
| 7 Experiment              | 1D                                      |
| 8 Probe                   | 5 mm PABBO BB-1H/ D Z-GRD Z800701/ 0072 |
| 9 Number of Scans         | 2048                                    |
| 10 Receiver Gain          | 2300.0                                  |
| 11 Relaxation Delay       | 2.0000                                  |
| 12 Pulse Width            | 10.2000                                 |
| 13 Spectrometer Frequency | 125.78                                  |
| 14 Spectral Width         | 32894.7                                 |
| 15 Lowest Frequency       | -3871.8                                 |
| 16 Nucleus                | 13C                                     |
| 17 Acquired Size          | 32768                                   |
| 18 Spectral Size          | 65536                                   |

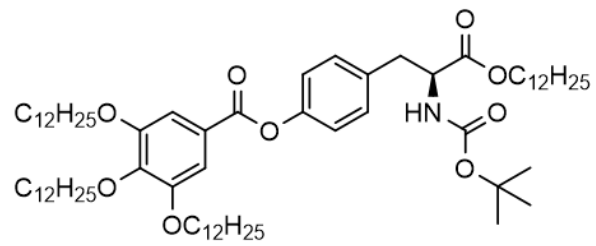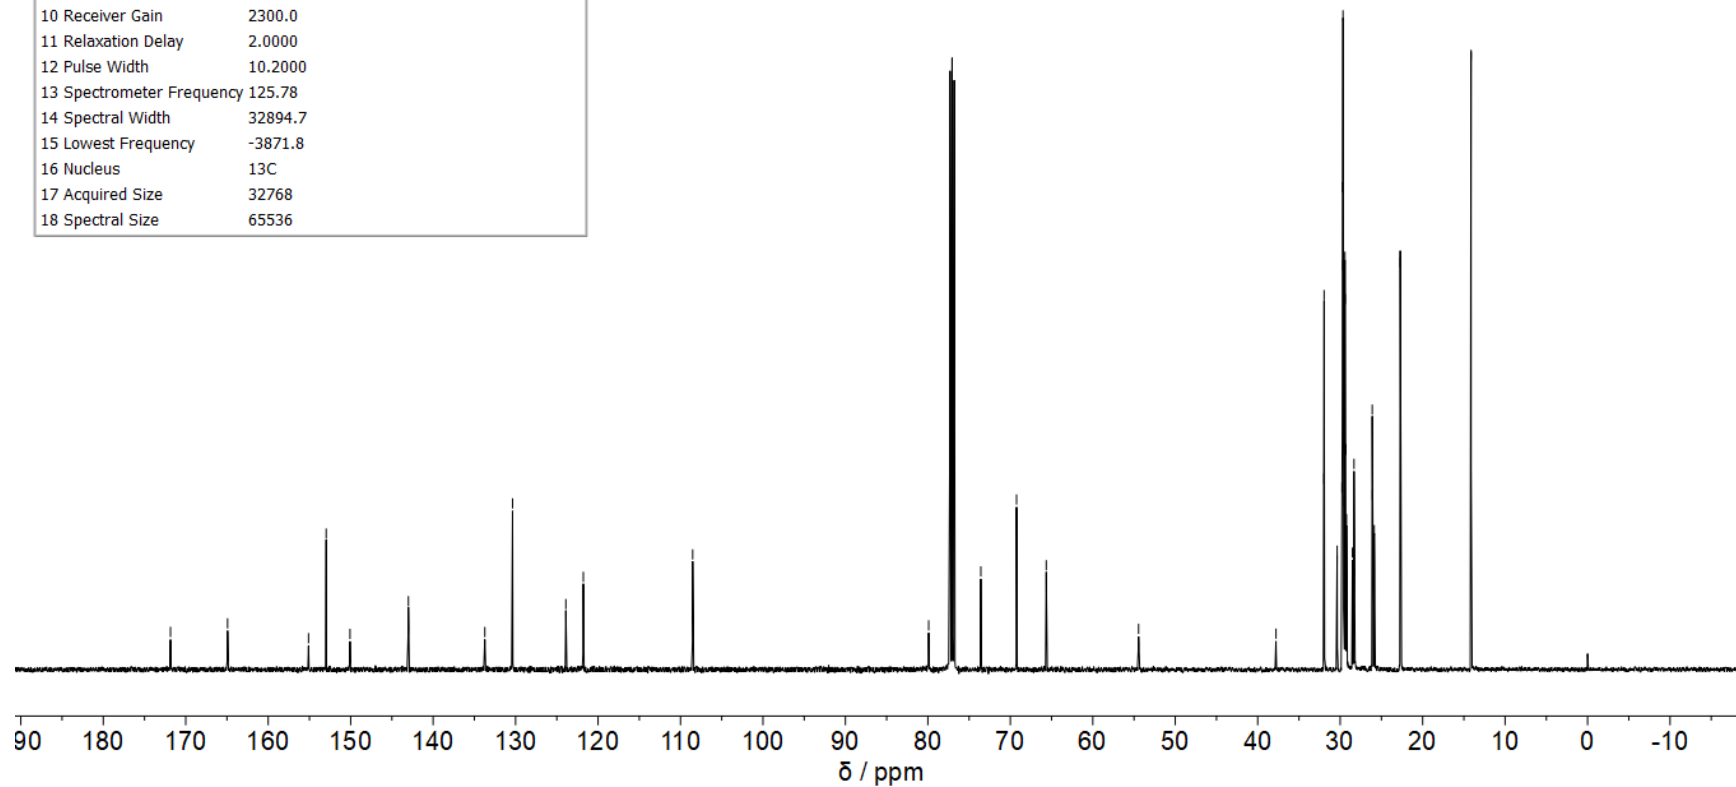

3,4,5-C<sub>14</sub>TyrC<sub>12</sub>Boc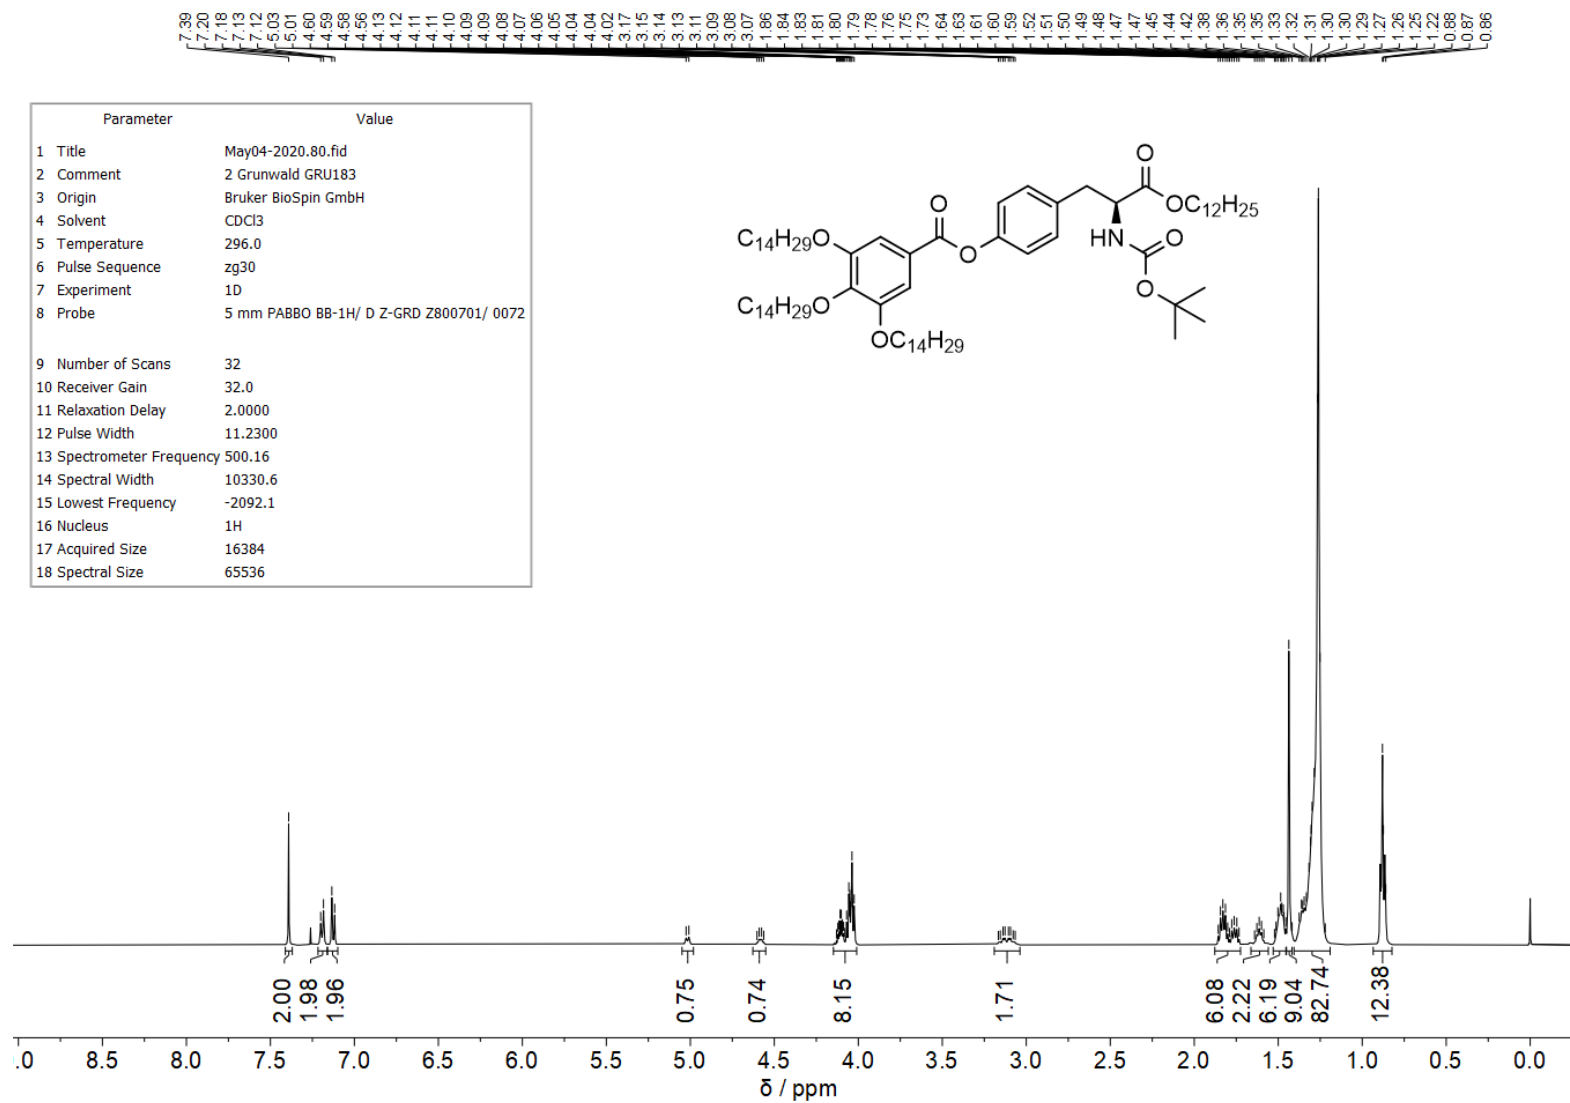



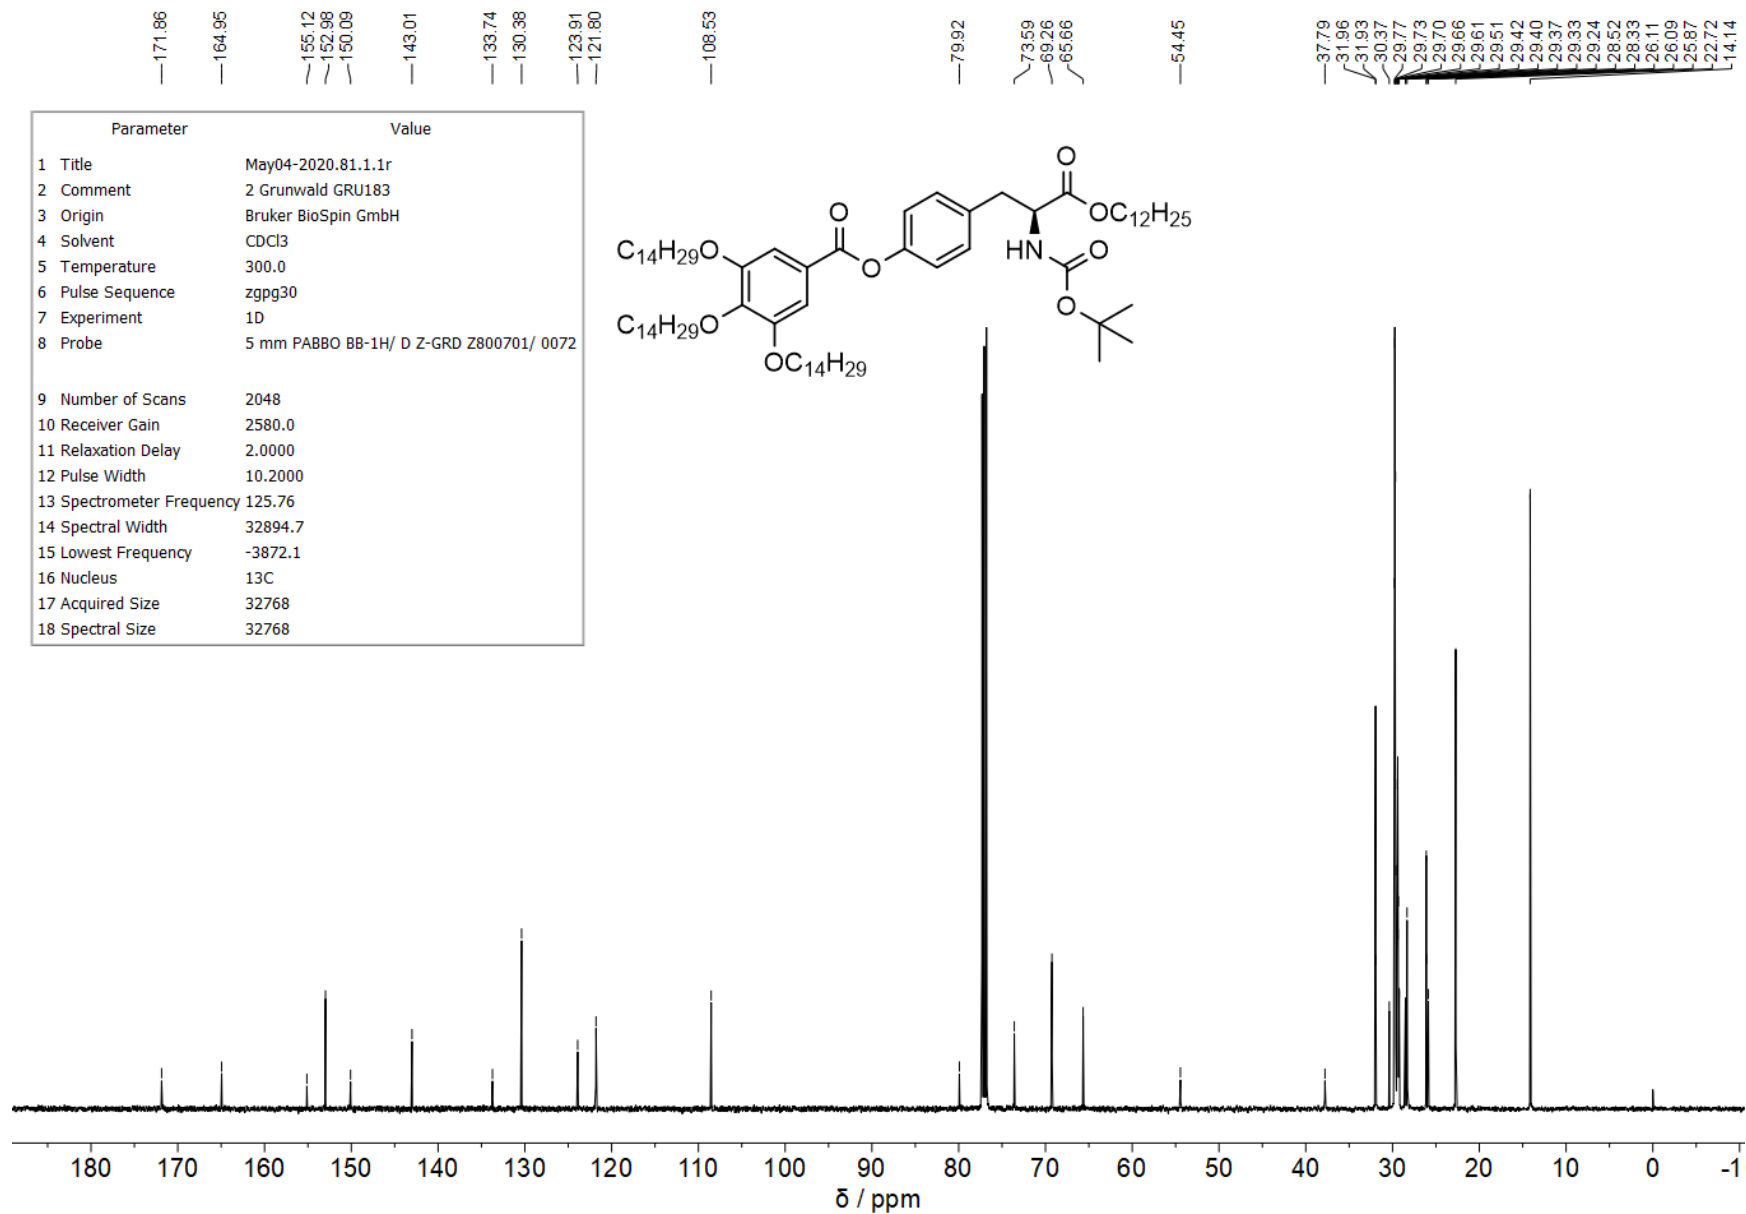

3,4,5-C<sub>10</sub>TyrC<sub>14</sub>Boc

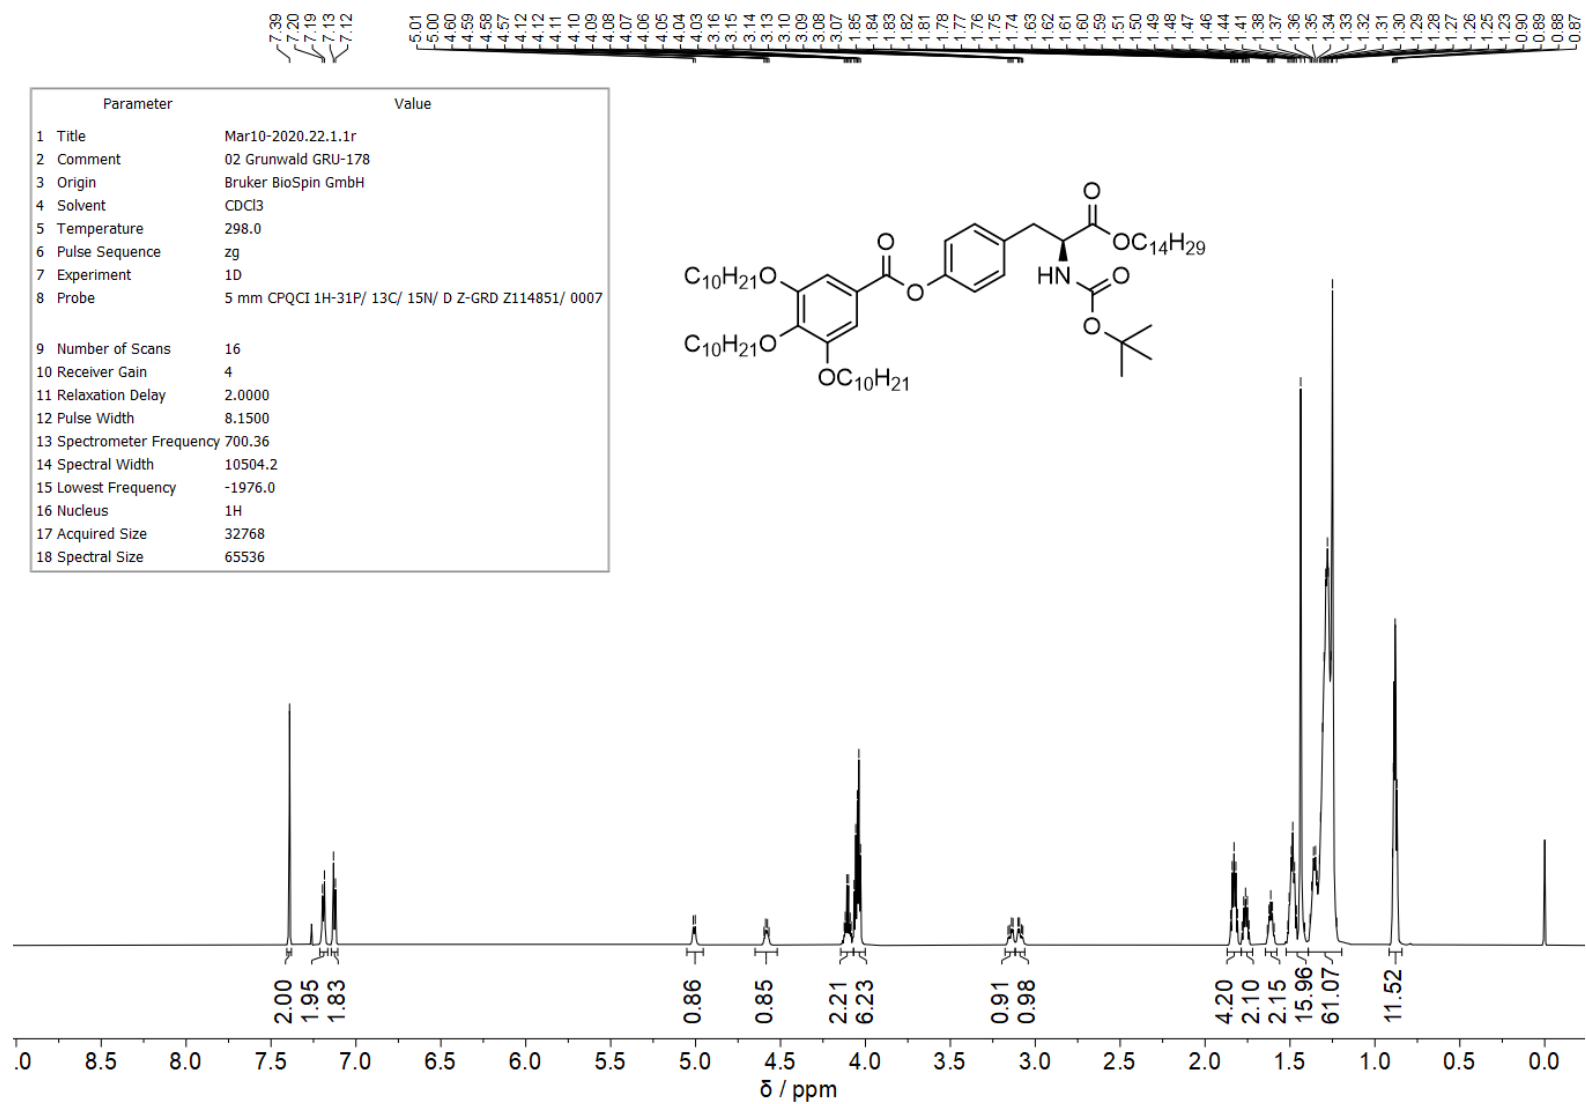

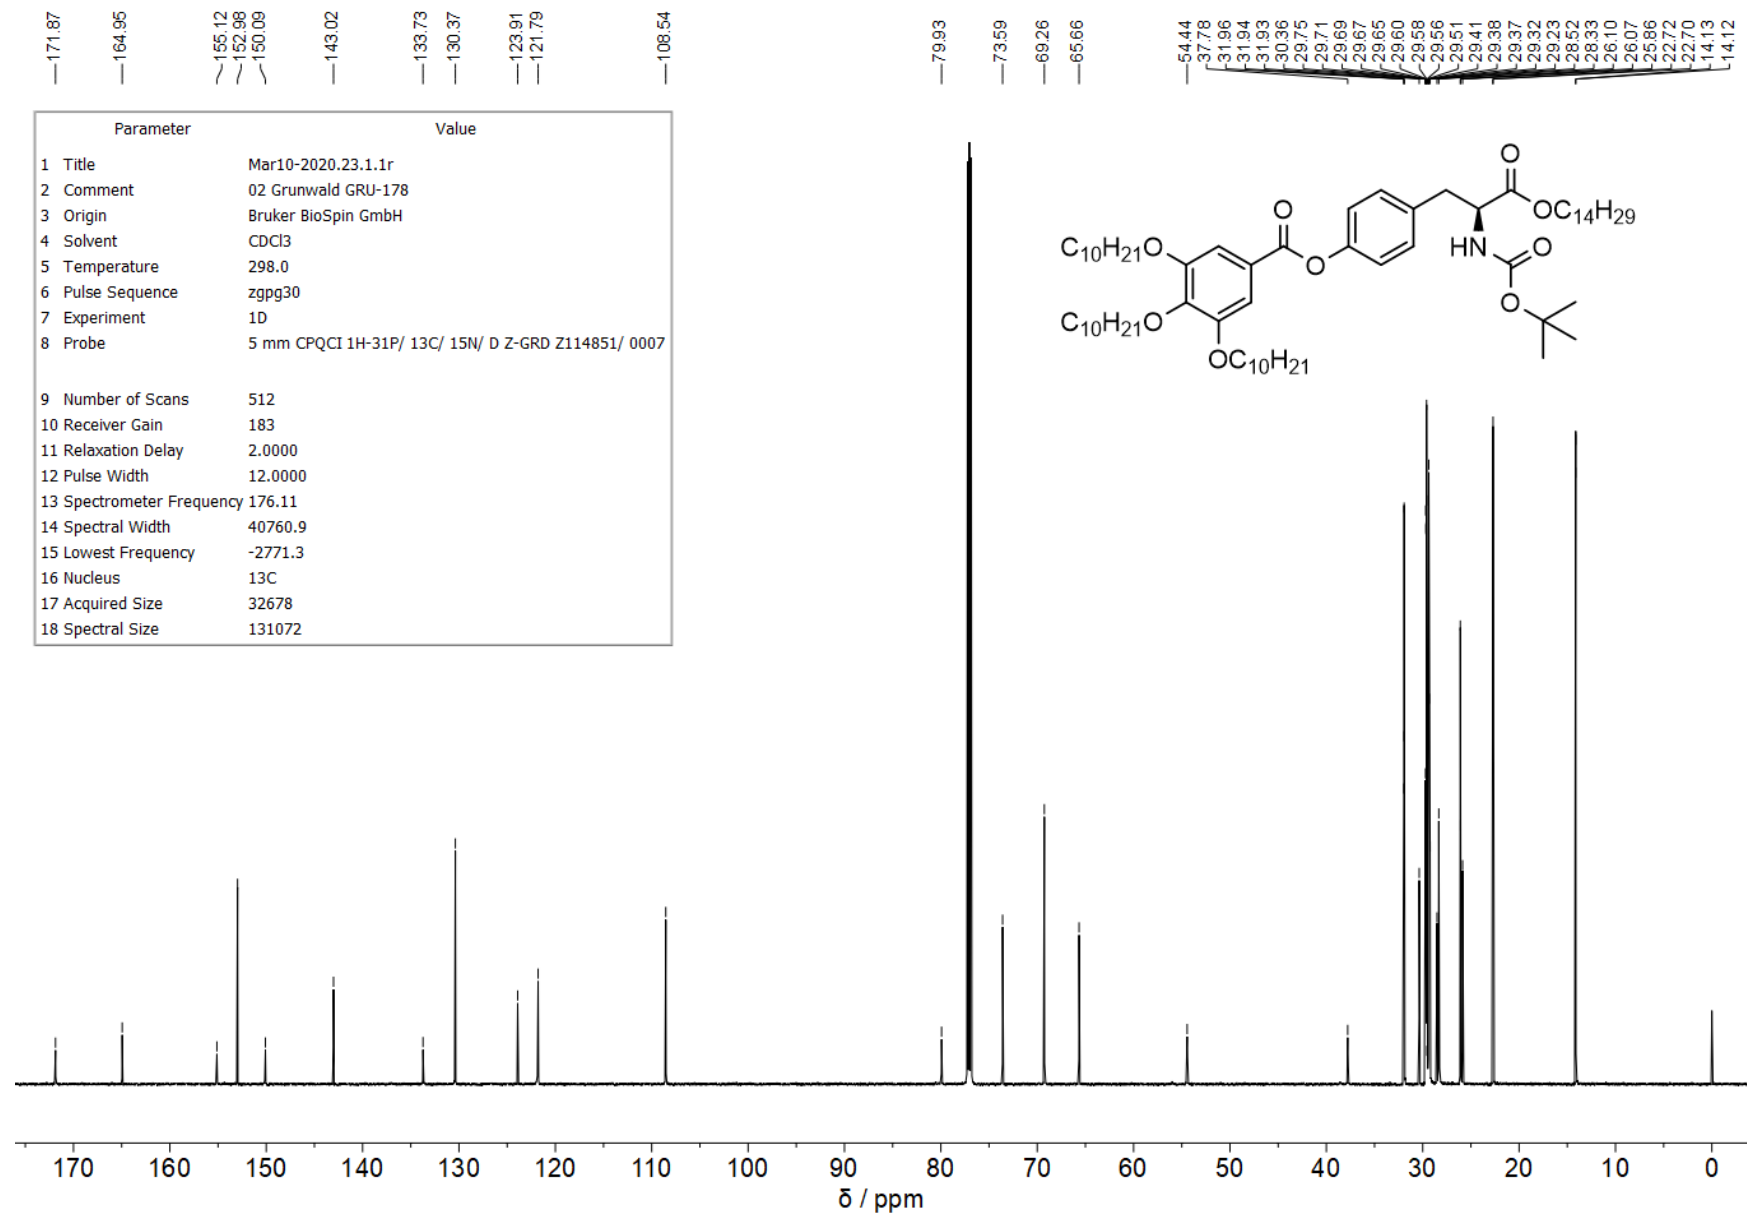

3,4,5-C<sub>12</sub>TyrC<sub>14</sub>Boc

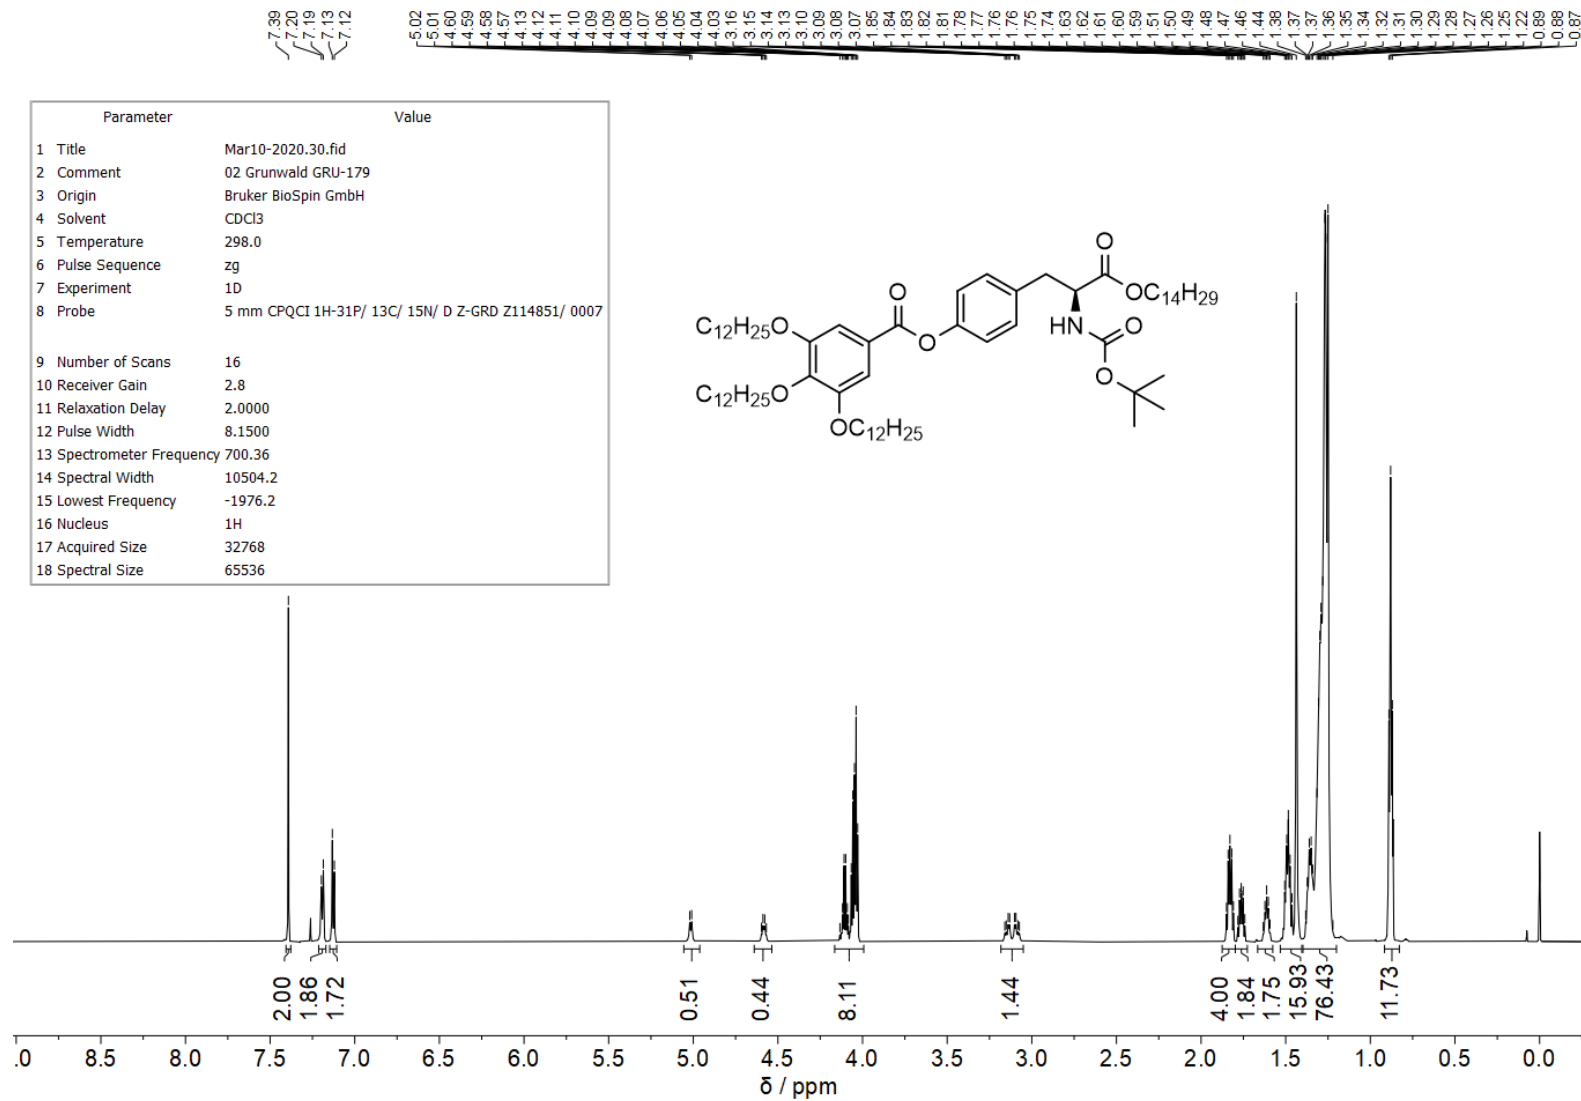

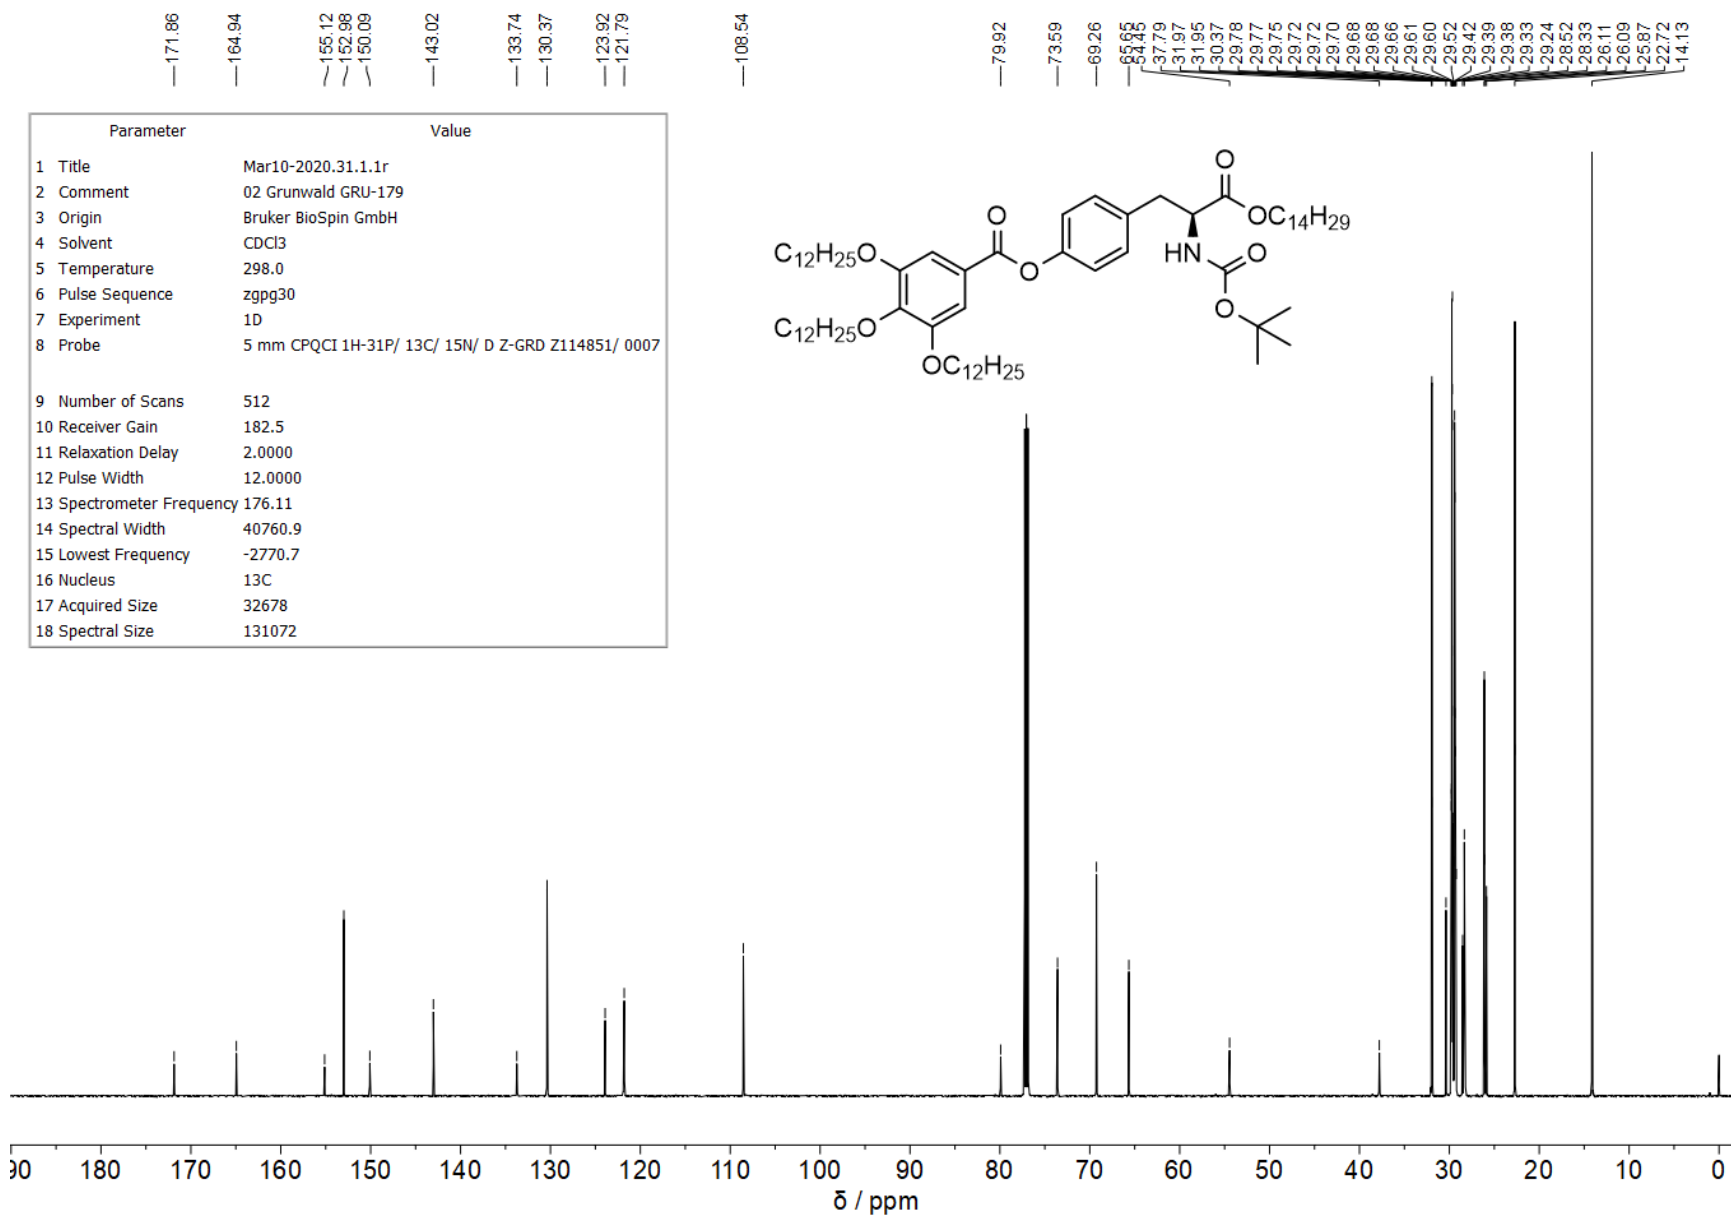

| Parameter                 | Value                                              |
|---------------------------|----------------------------------------------------|
| 1 Title                   | Mar10-2020.31.1.1r                                 |
| 2 Comment                 | 02 Grunwald GRU-179                                |
| 3 Origin                  | Bruker BioSpin GmbH                                |
| 4 Solvent                 | CDCl3                                              |
| 5 Temperature             | 298.0                                              |
| 6 Pulse Sequence          | zgpg30                                             |
| 7 Experiment              | 1D                                                 |
| 8 Probe                   | 5 mm CPQCI 1H-31P/ 13C/ 15N/ D Z-GRD Z114851/ 0007 |
| 9 Number of Scans         | 512                                                |
| 10 Receiver Gain          | 182.5                                              |
| 11 Relaxation Delay       | 2.0000                                             |
| 12 Pulse Width            | 12.0000                                            |
| 13 Spectrometer Frequency | 176.11                                             |
| 14 Spectral Width         | 40760.9                                            |
| 15 Lowest Frequency       | -2770.7                                            |
| 16 Nucleus                | 13C                                                |
| 17 Acquired Size          | 32678                                              |
| 18 Spectral Size          | 131072                                             |

3,4,5-C<sub>14</sub>TyrC<sub>14</sub>Boc

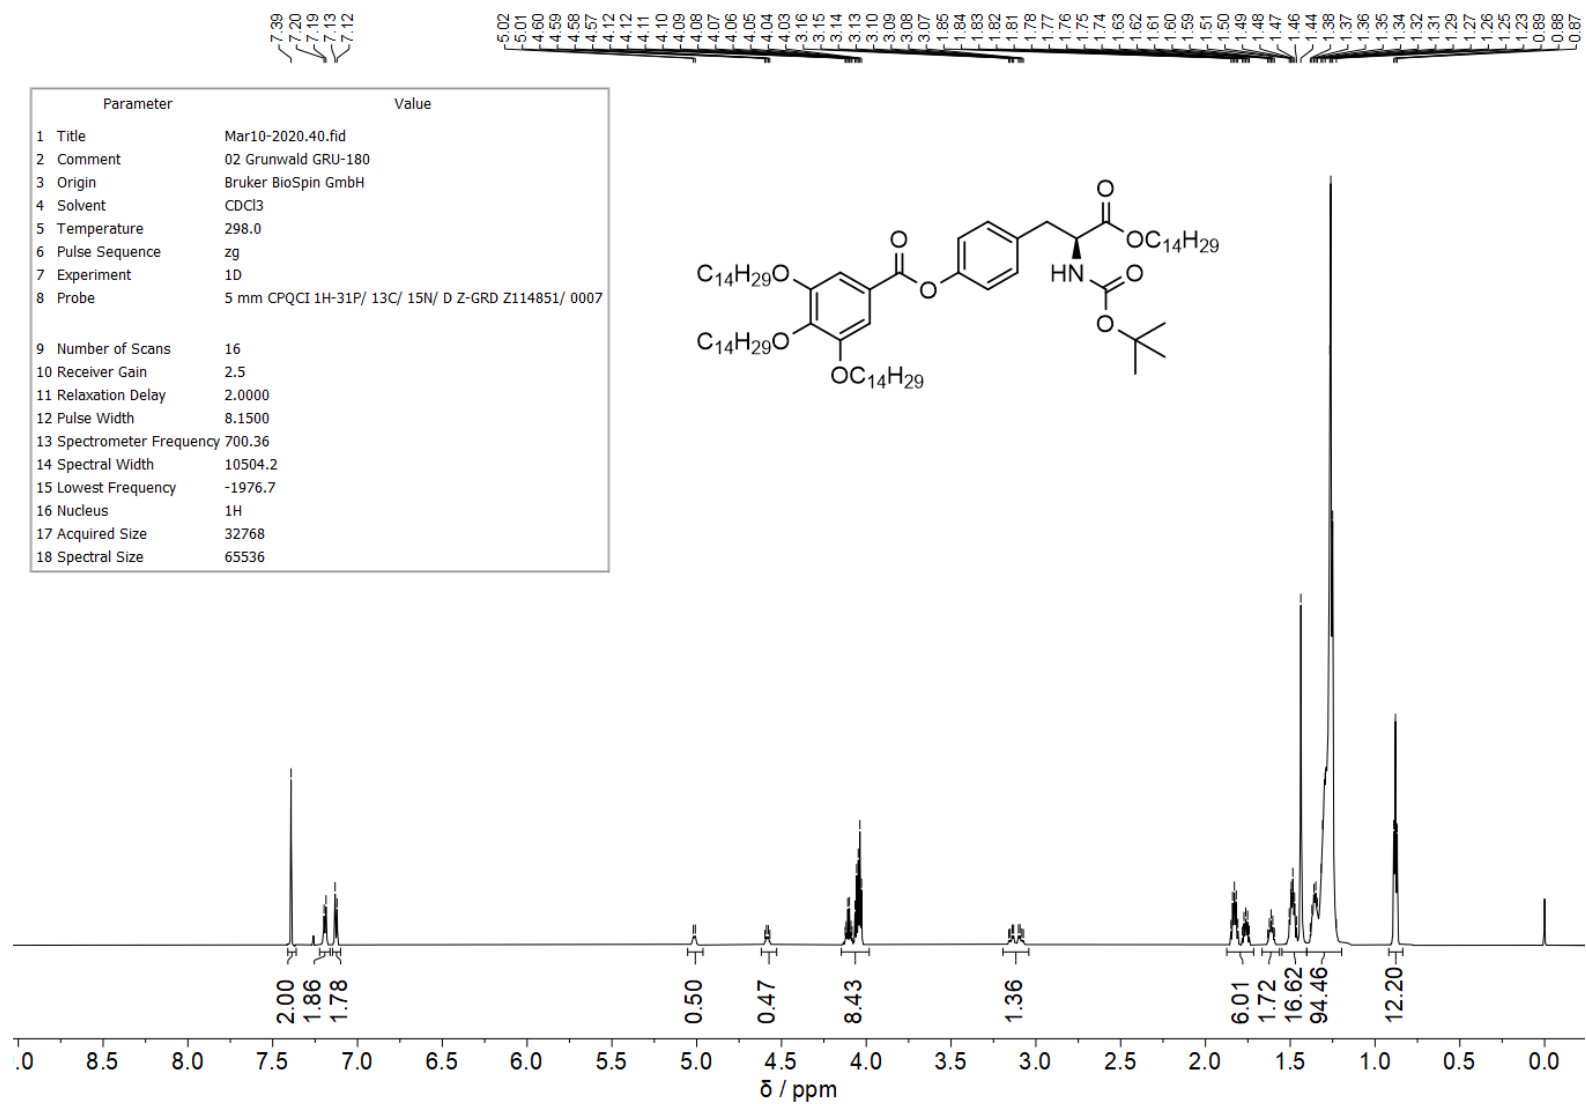

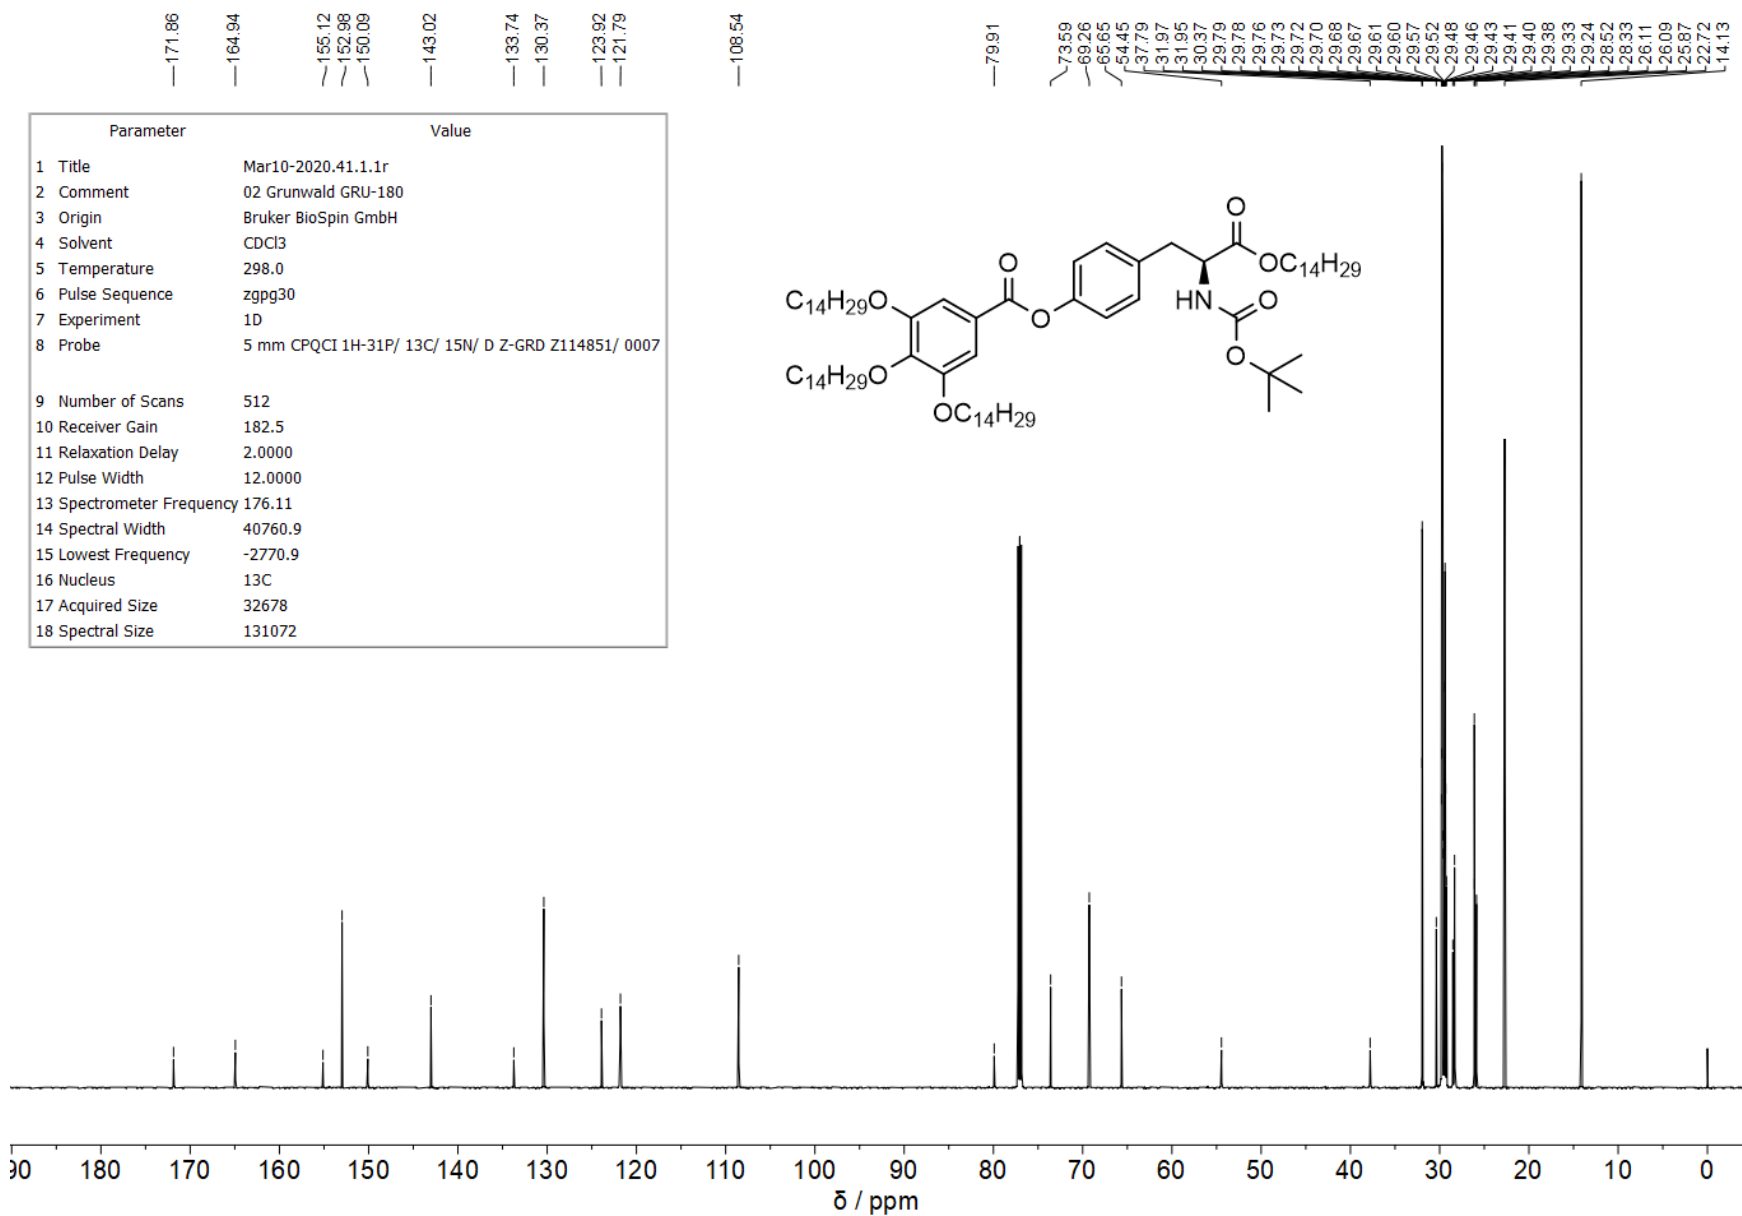

| Parameter                 | Value                                              |
|---------------------------|----------------------------------------------------|
| 1 Title                   | Mar10-2020.41.1.1r                                 |
| 2 Comment                 | 02 Grunwald GRU-180                                |
| 3 Origin                  | Bruker BioSpin GmbH                                |
| 4 Solvent                 | CDCl3                                              |
| 5 Temperature             | 298.0                                              |
| 6 Pulse Sequence          | zgpg30                                             |
| 7 Experiment              | 1D                                                 |
| 8 Probe                   | 5 mm CPQCI 1H-31P/ 13C/ 15N/ D Z-GRD Z114851/ 0007 |
| 9 Number of Scans         | 512                                                |
| 10 Receiver Gain          | 182.5                                              |
| 11 Relaxation Delay       | 2.0000                                             |
| 12 Pulse Width            | 12.0000                                            |
| 13 Spectrometer Frequency | 176.11                                             |
| 14 Spectral Width         | 40760.9                                            |
| 15 Lowest Frequency       | -2770.9                                            |
| 16 Nucleus                | 13C                                                |
| 17 Acquired Size          | 32678                                              |
| 18 Spectral Size          | 131072                                             |

BzTyrC<sub>10</sub>NH<sub>2</sub>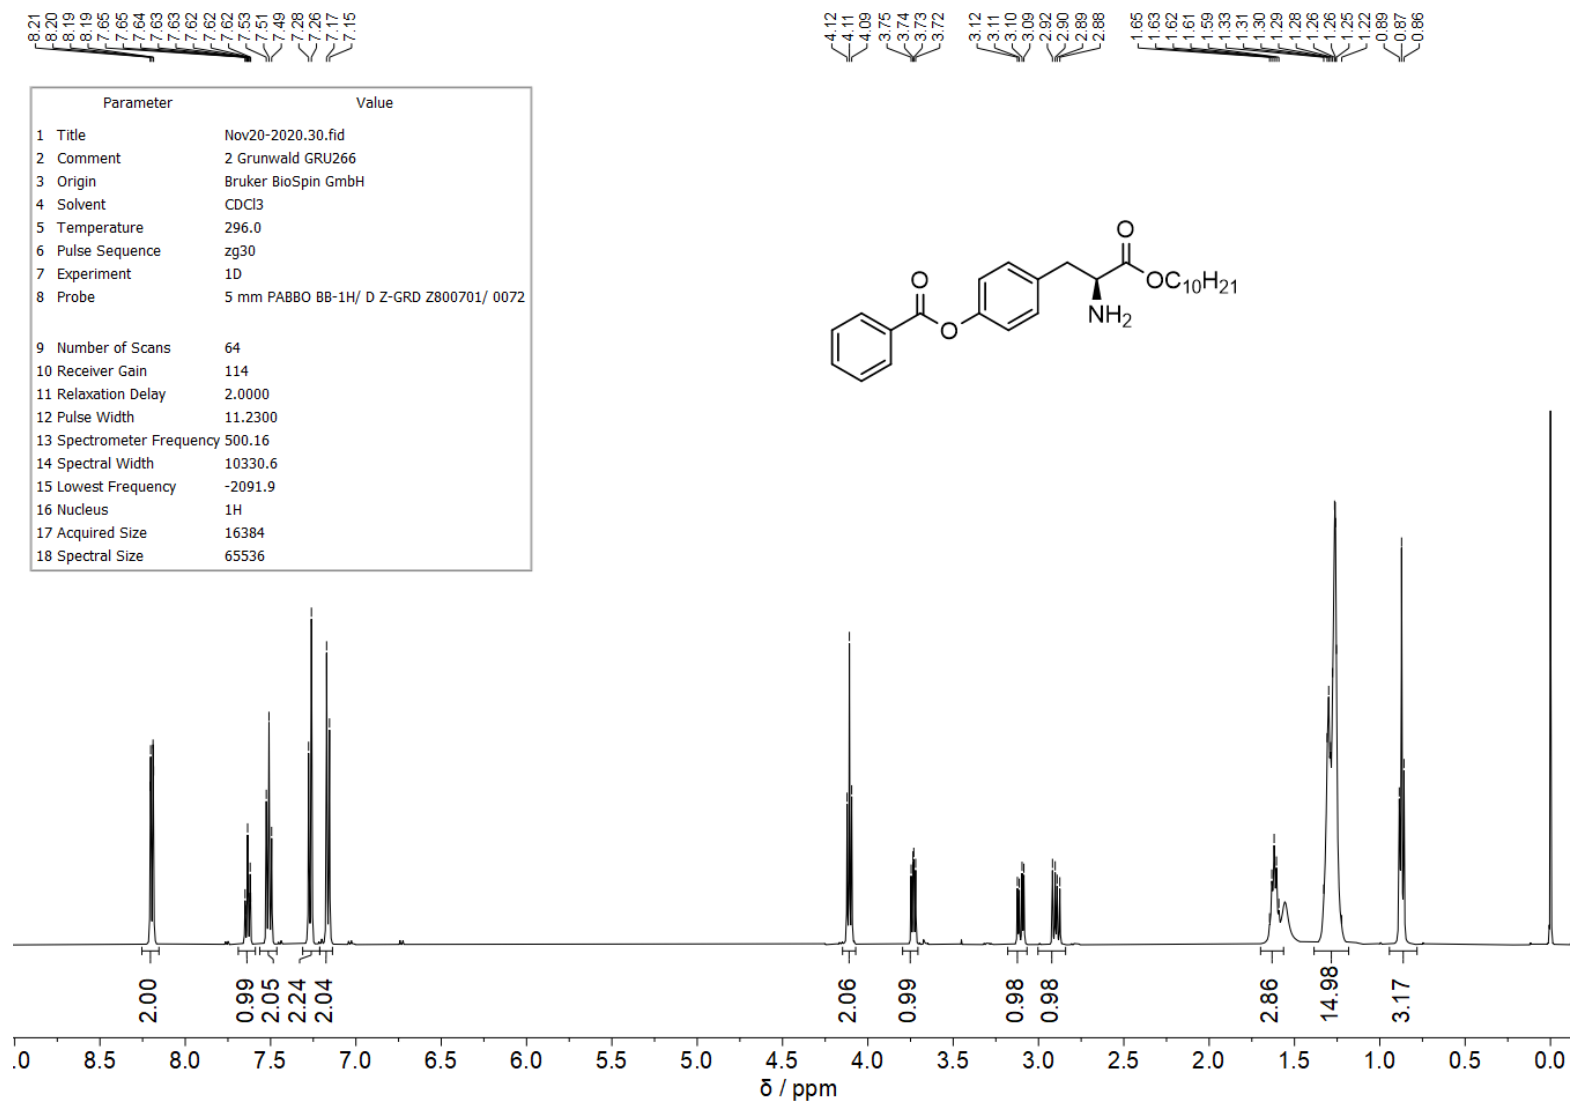



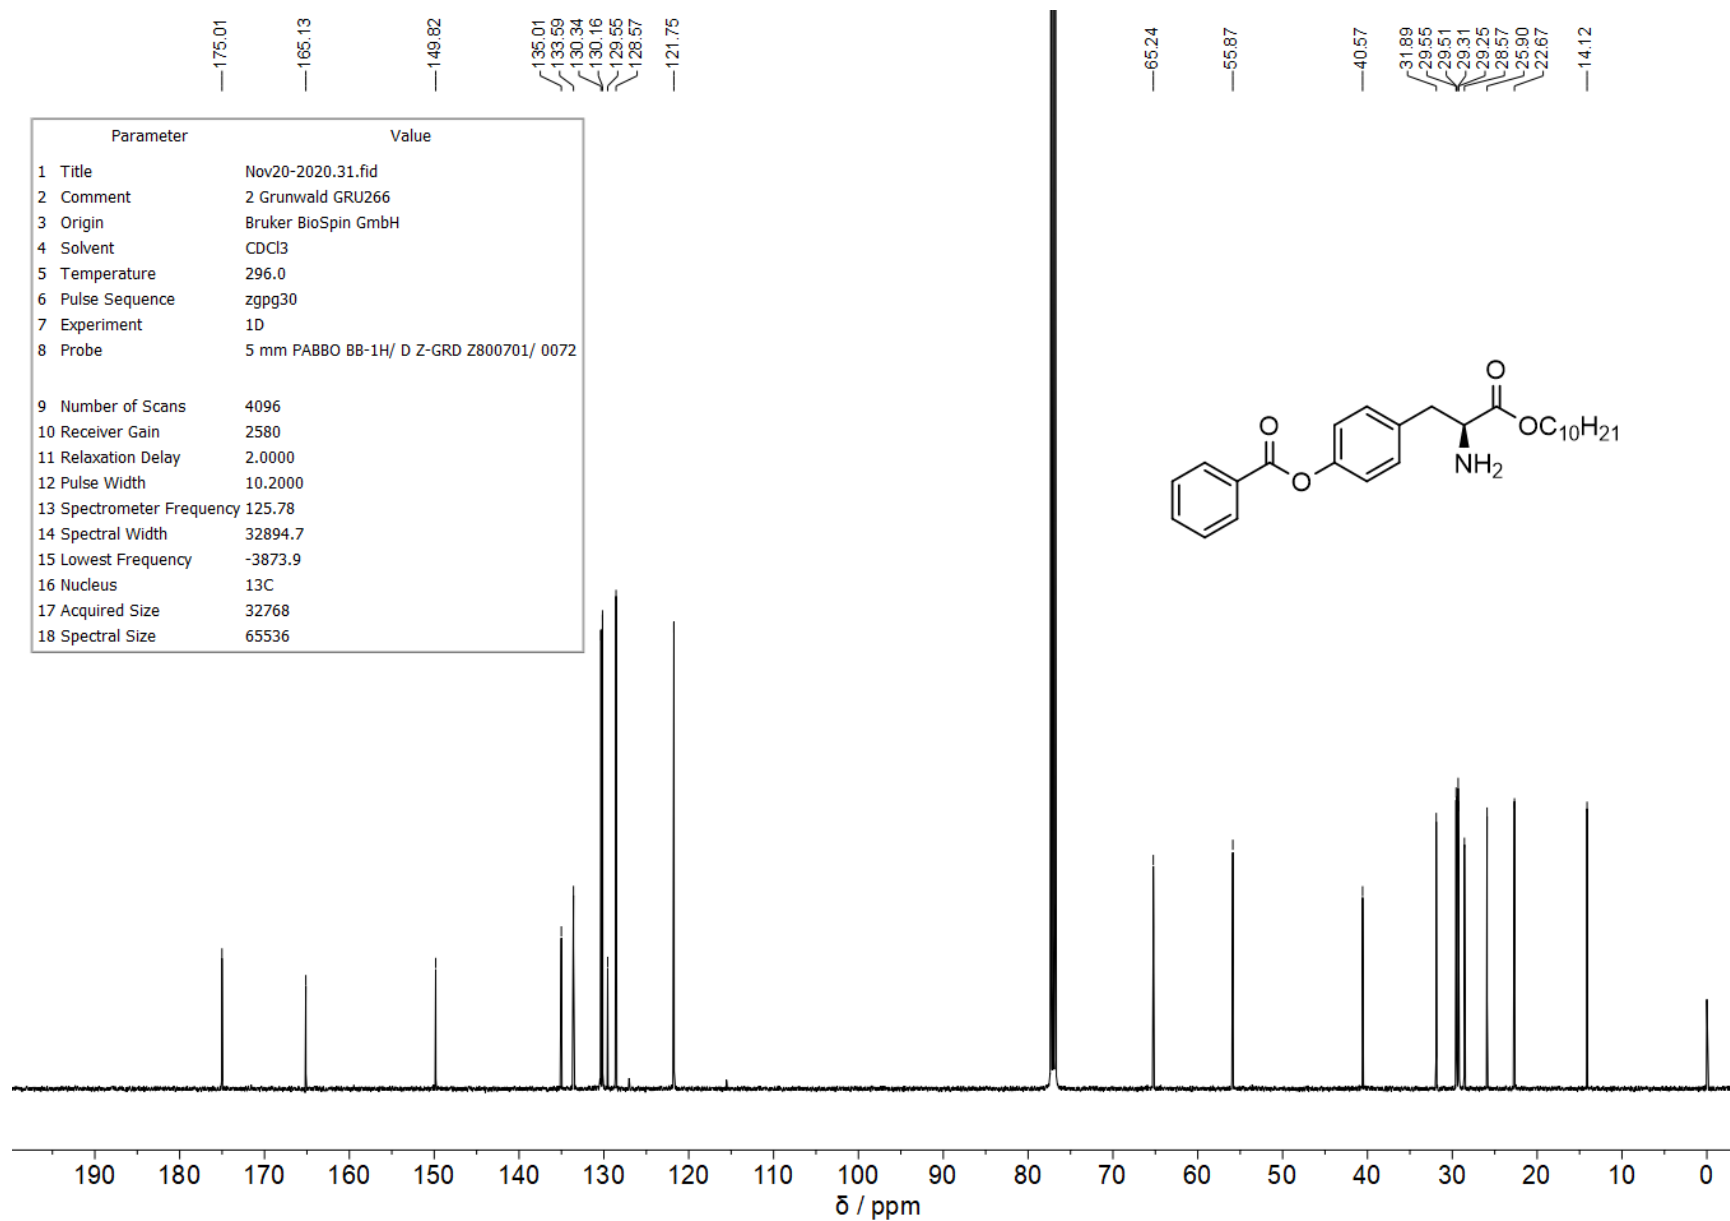

BzTyrC<sub>12</sub>NH<sub>2</sub>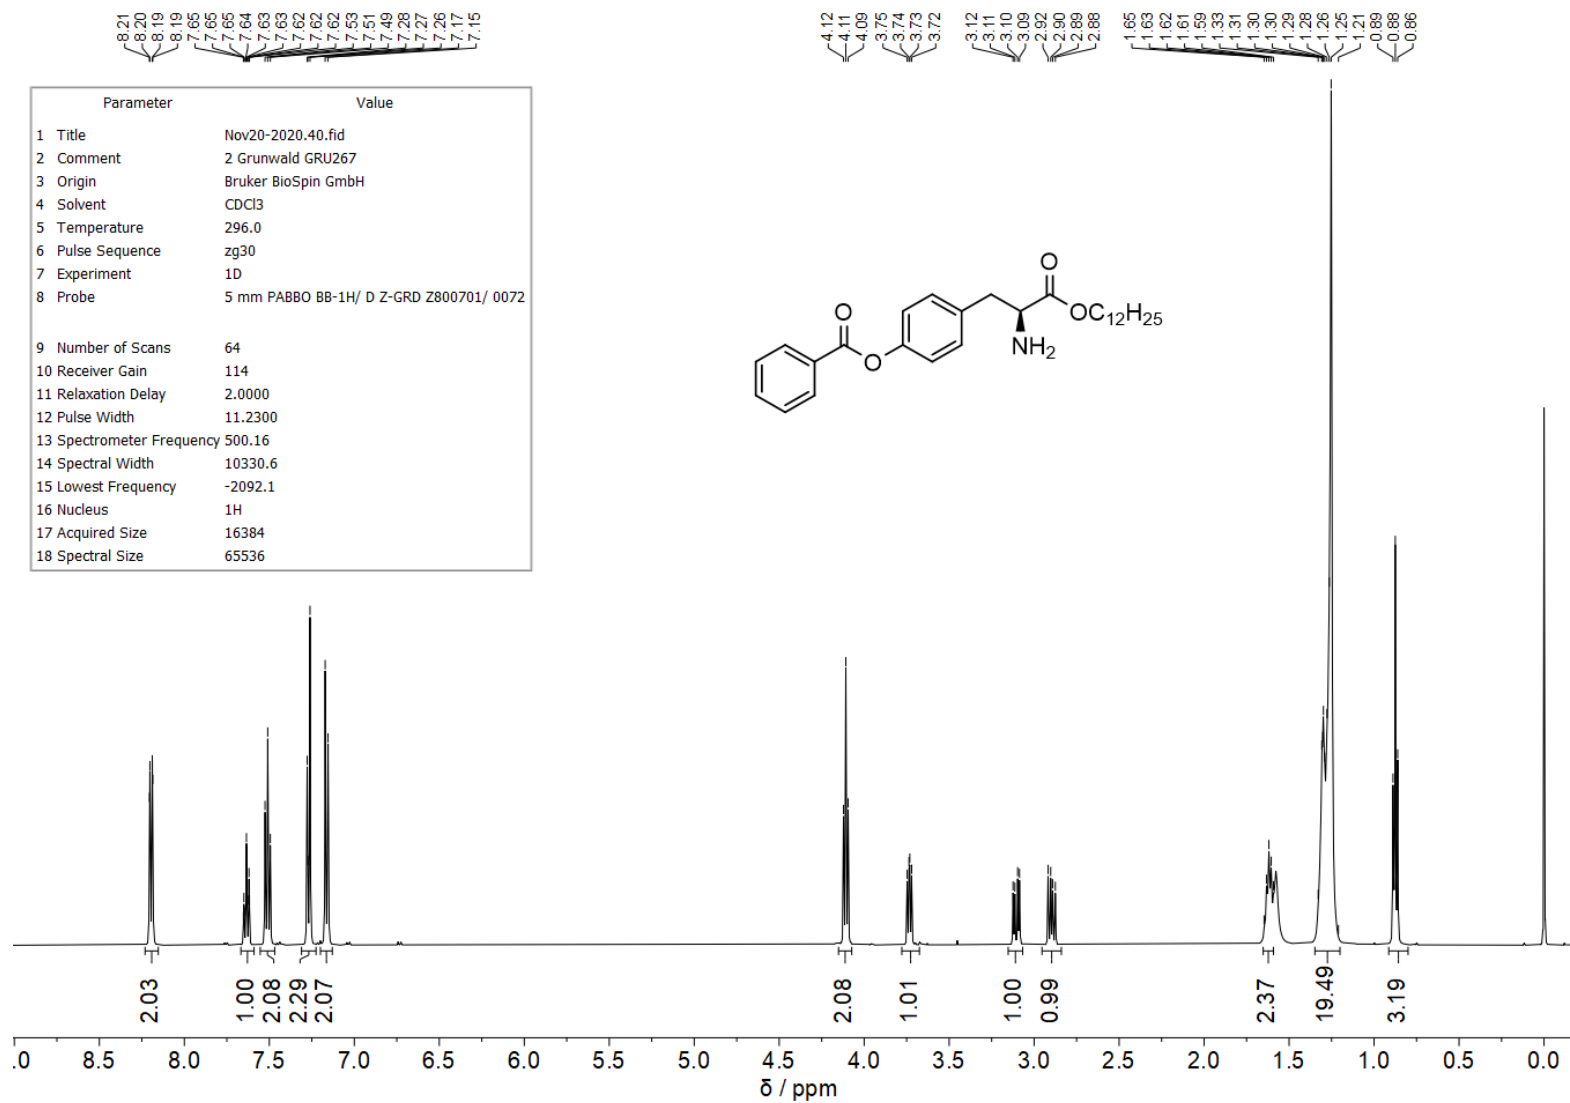

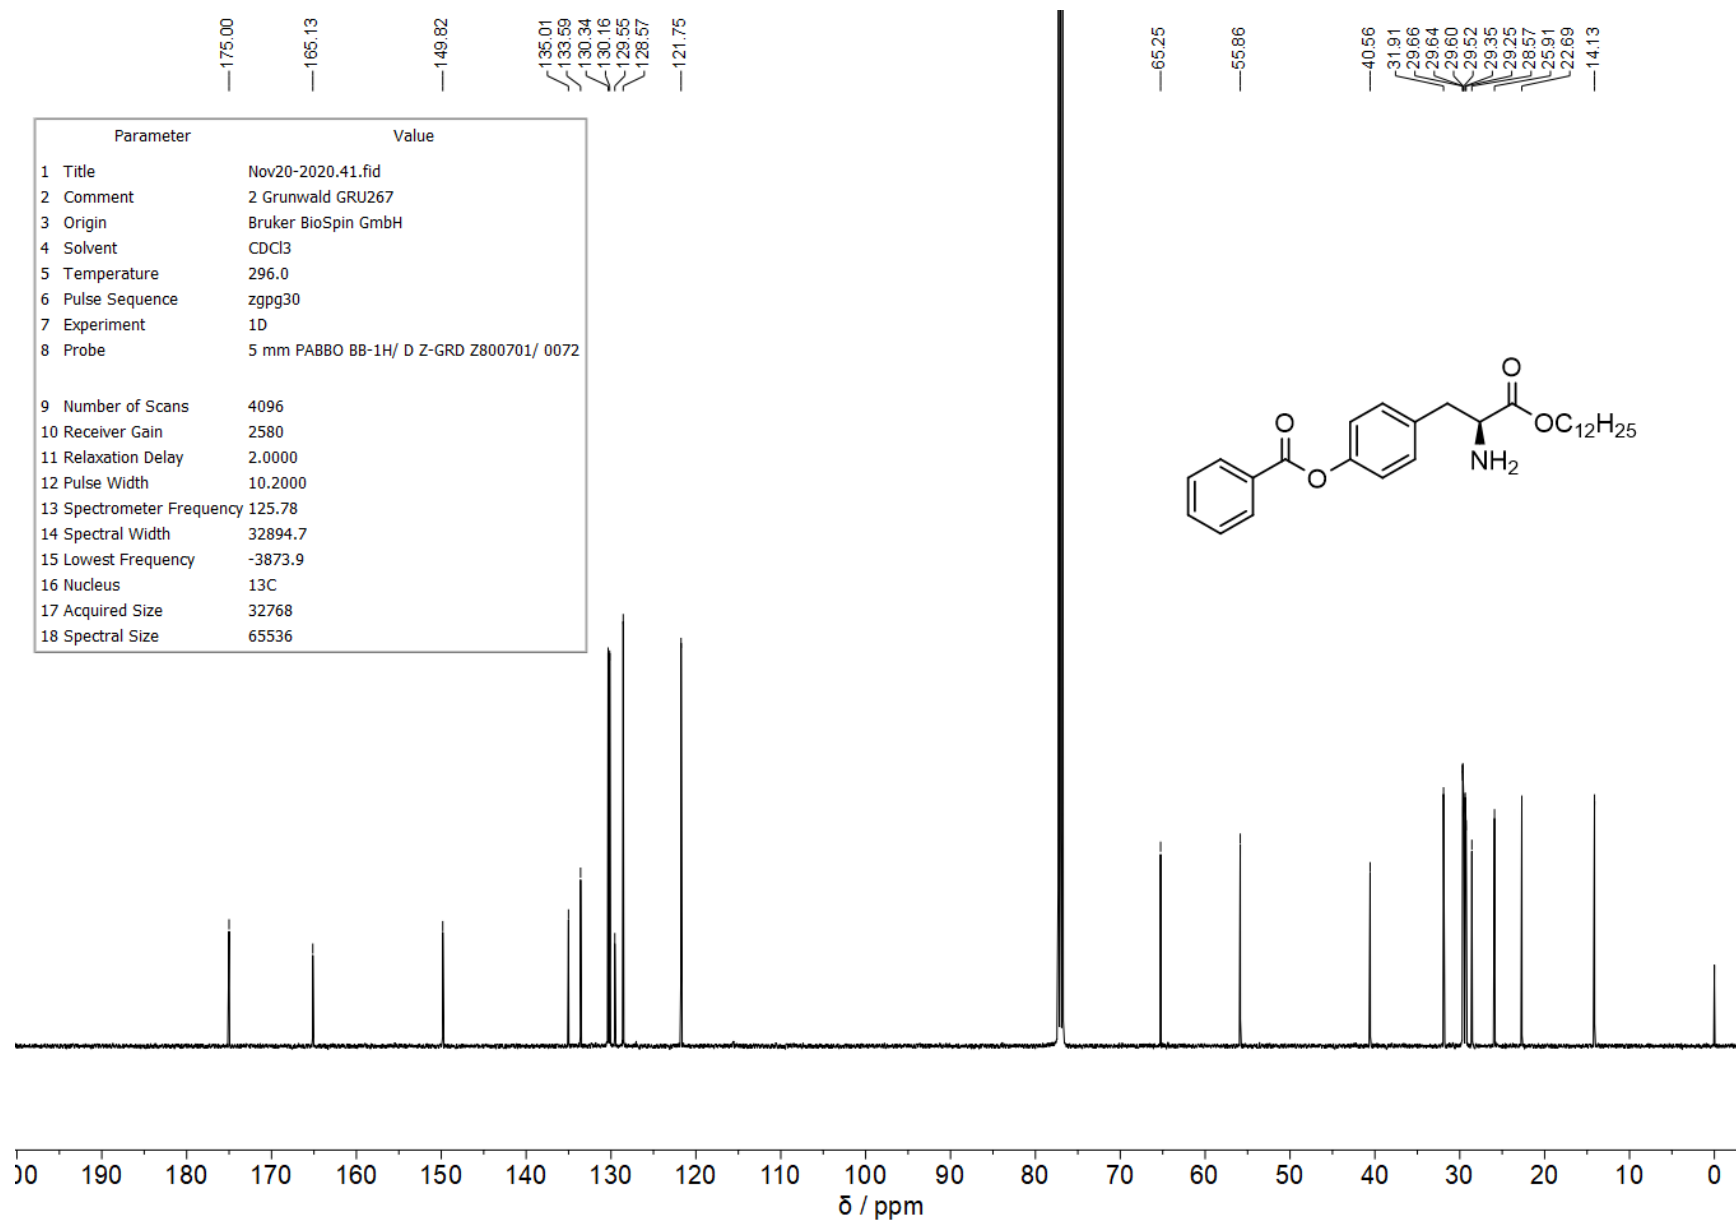

## BzTyrC14NH2

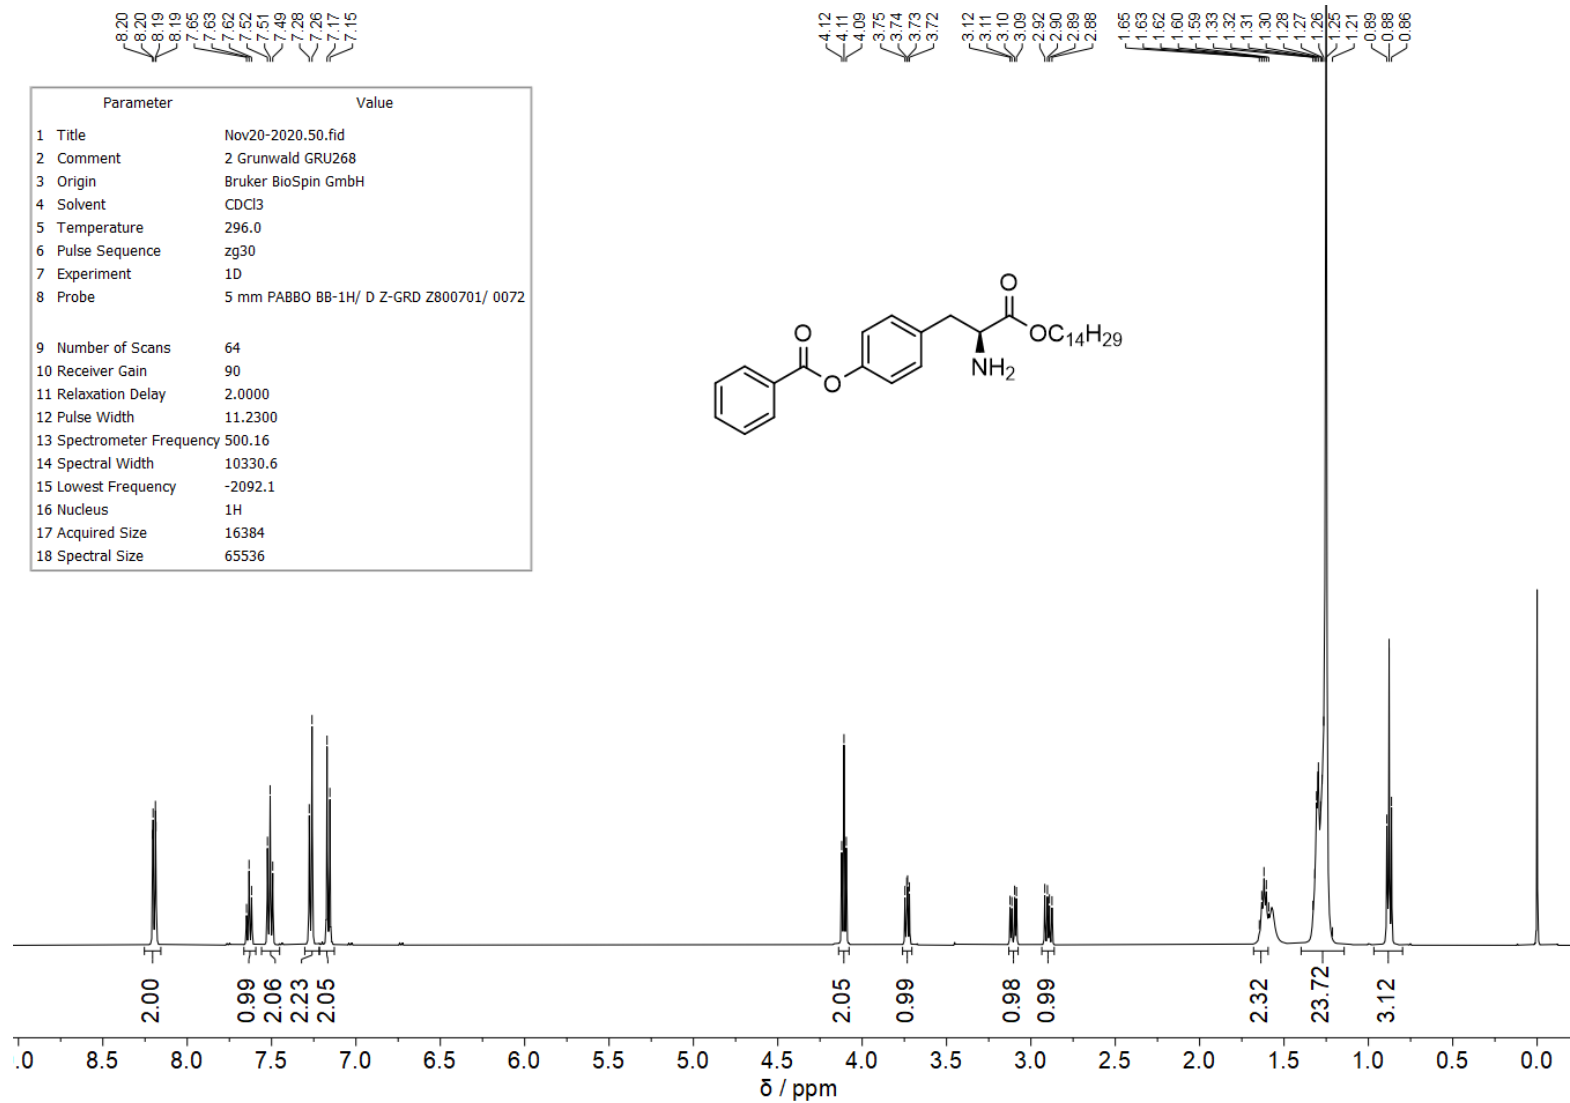

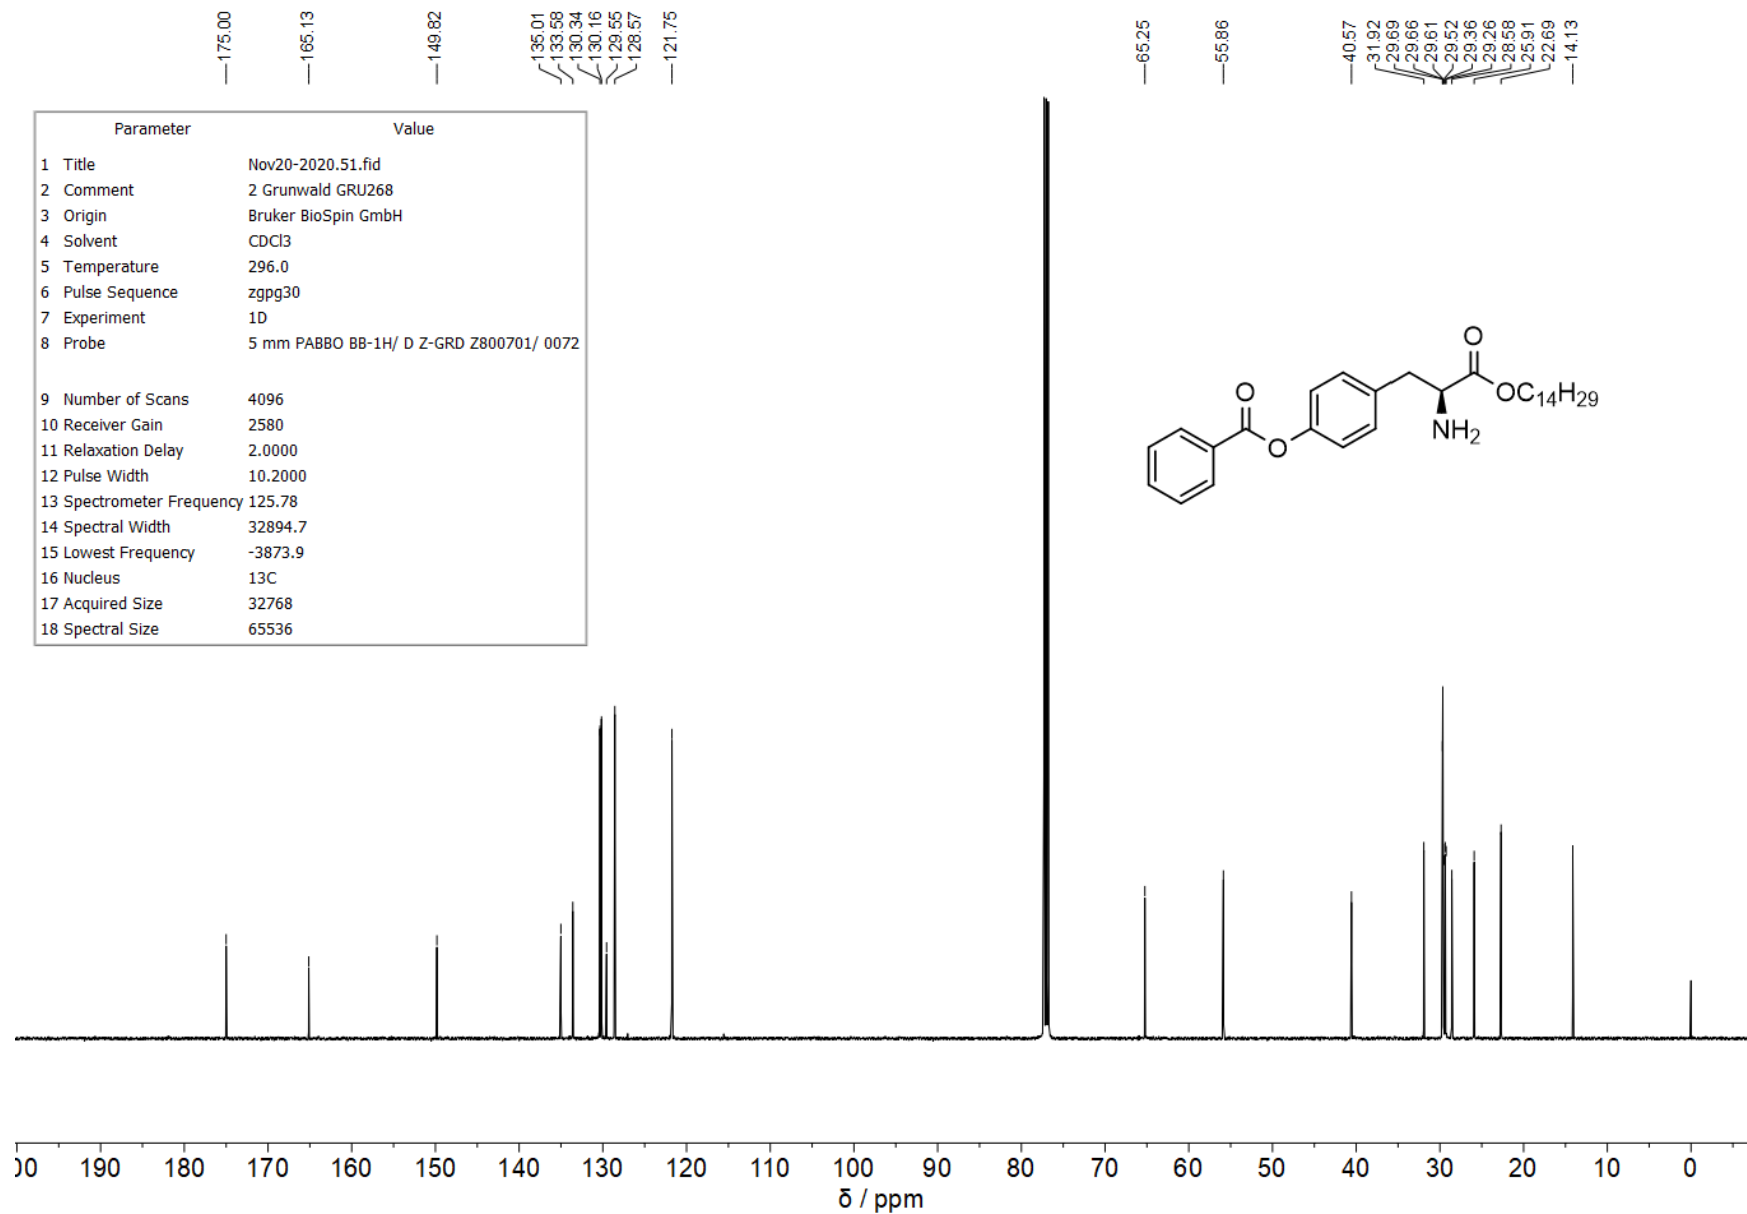

4-C<sub>10</sub>TyrC<sub>10</sub>NH<sub>2</sub>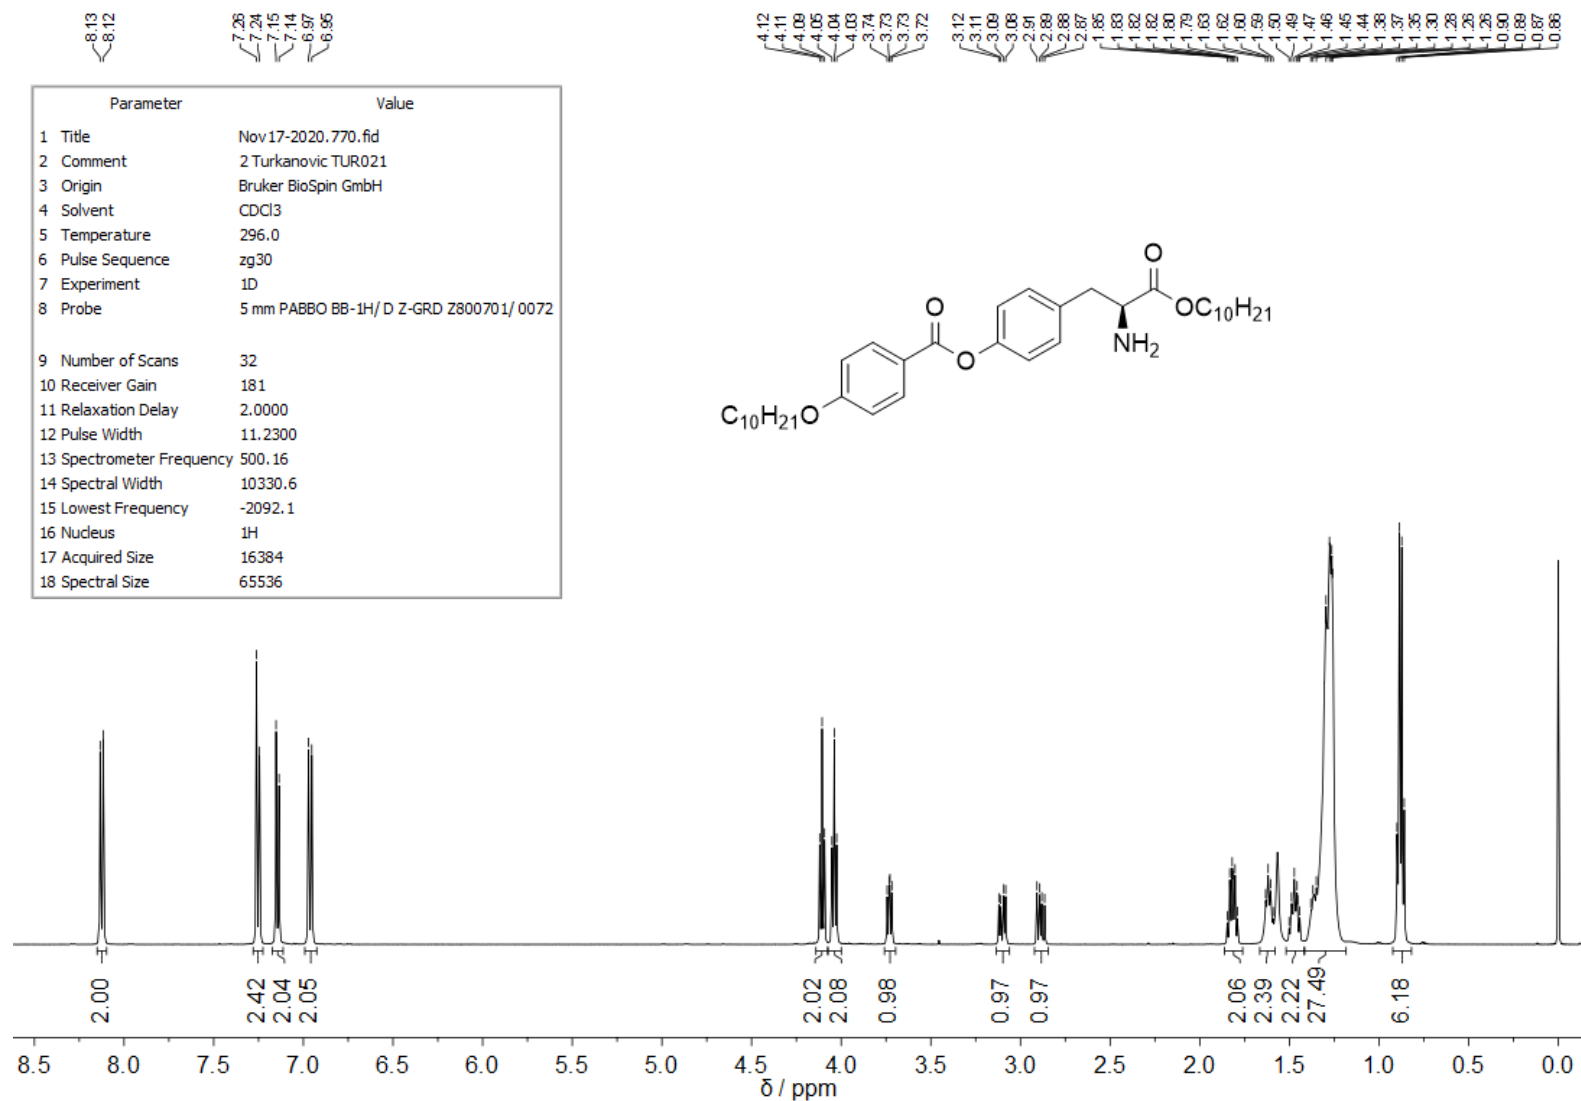

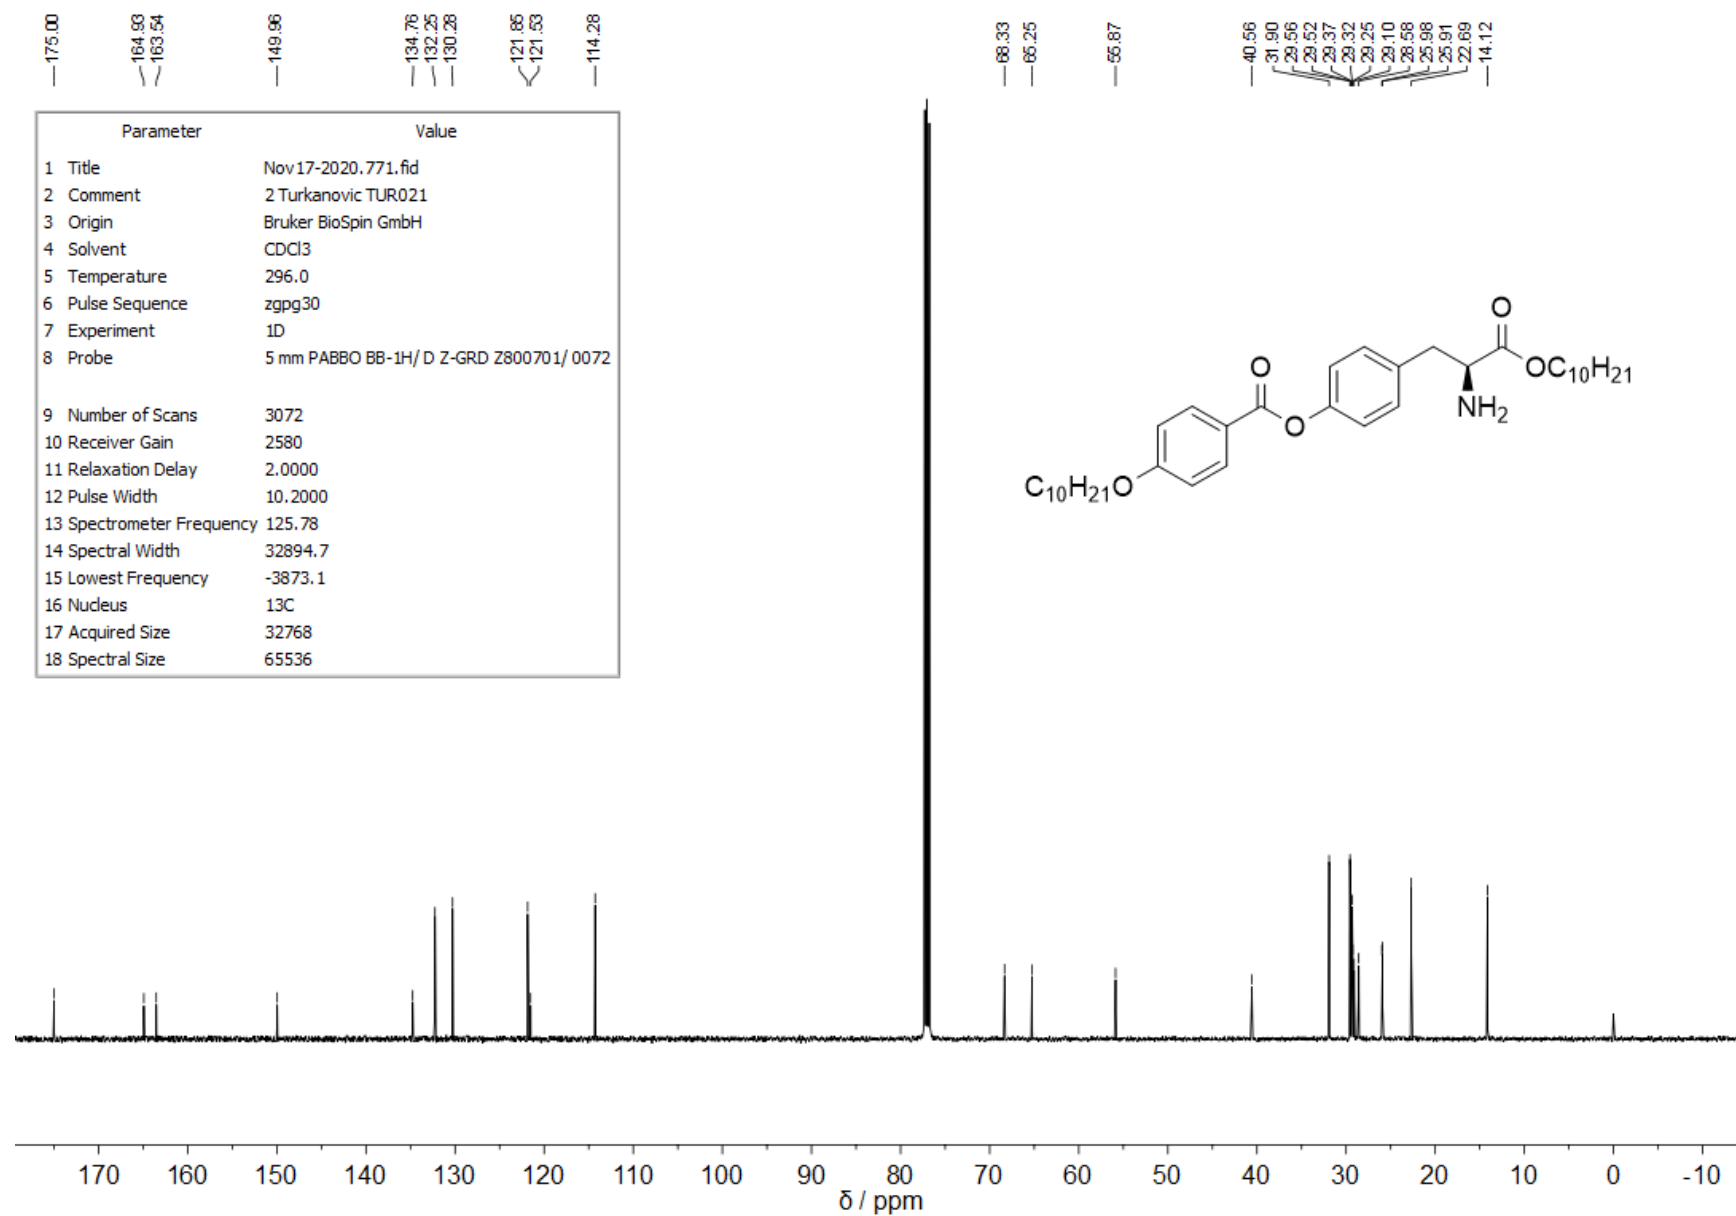

4-C<sub>12</sub>TyrC<sub>10</sub>NH<sub>2</sub>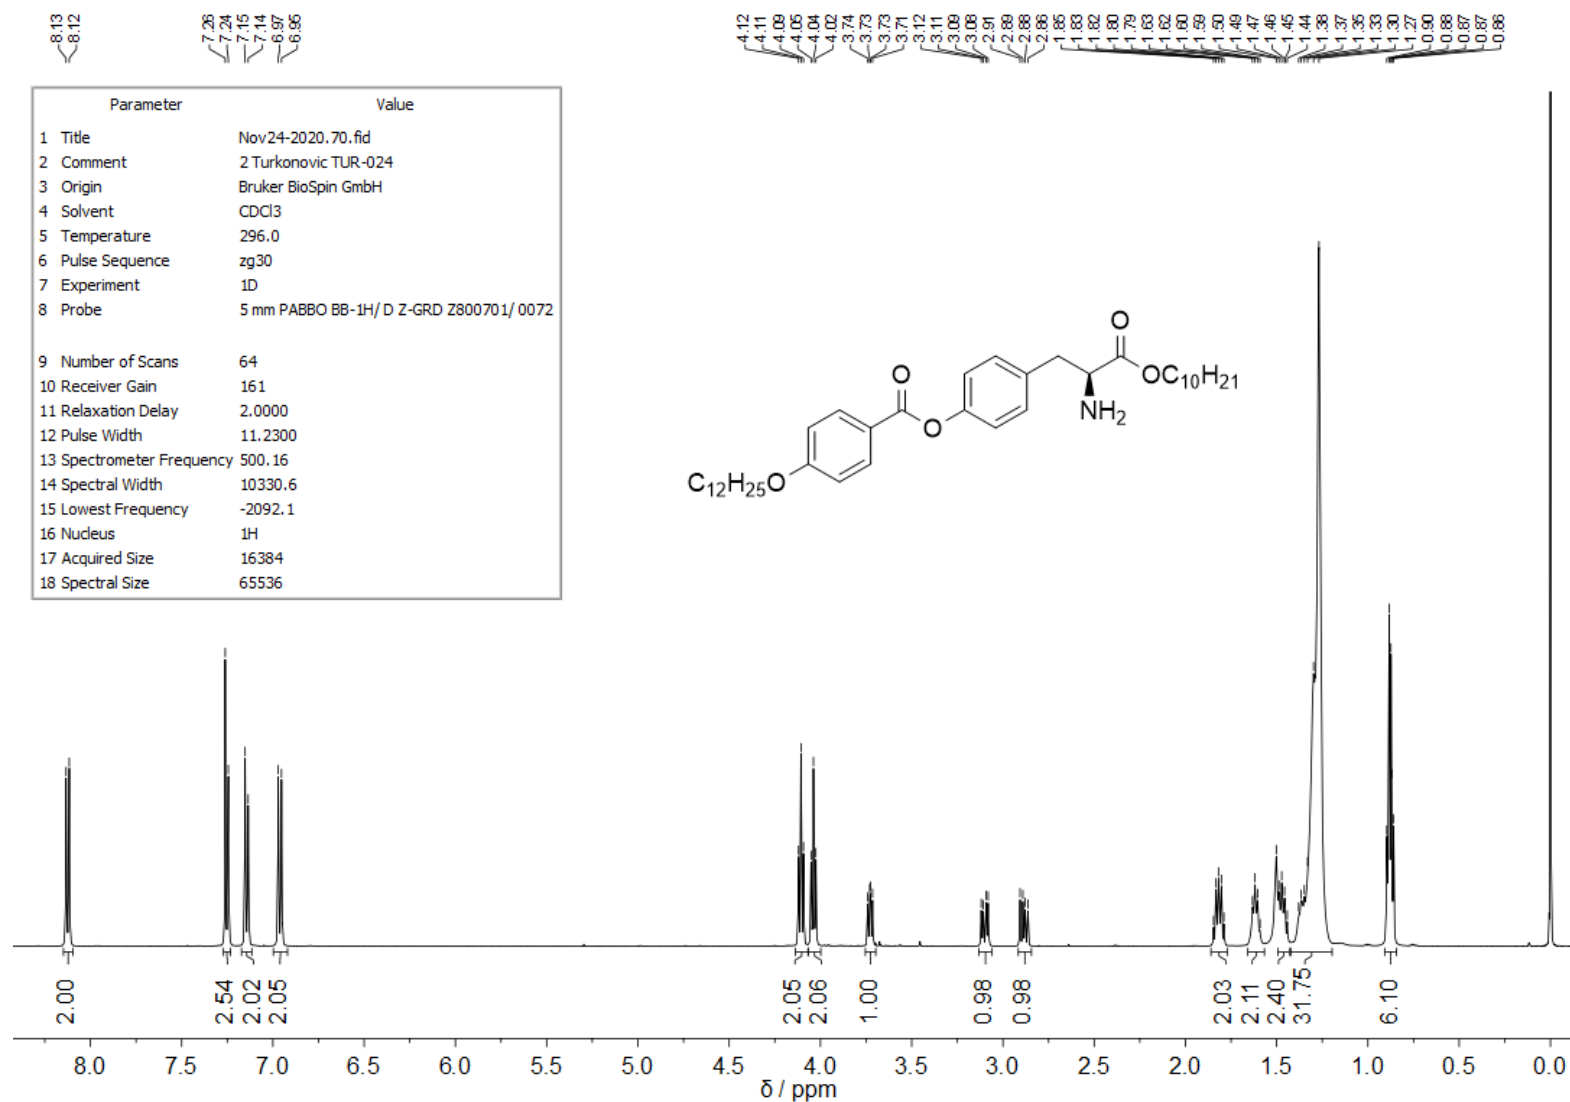



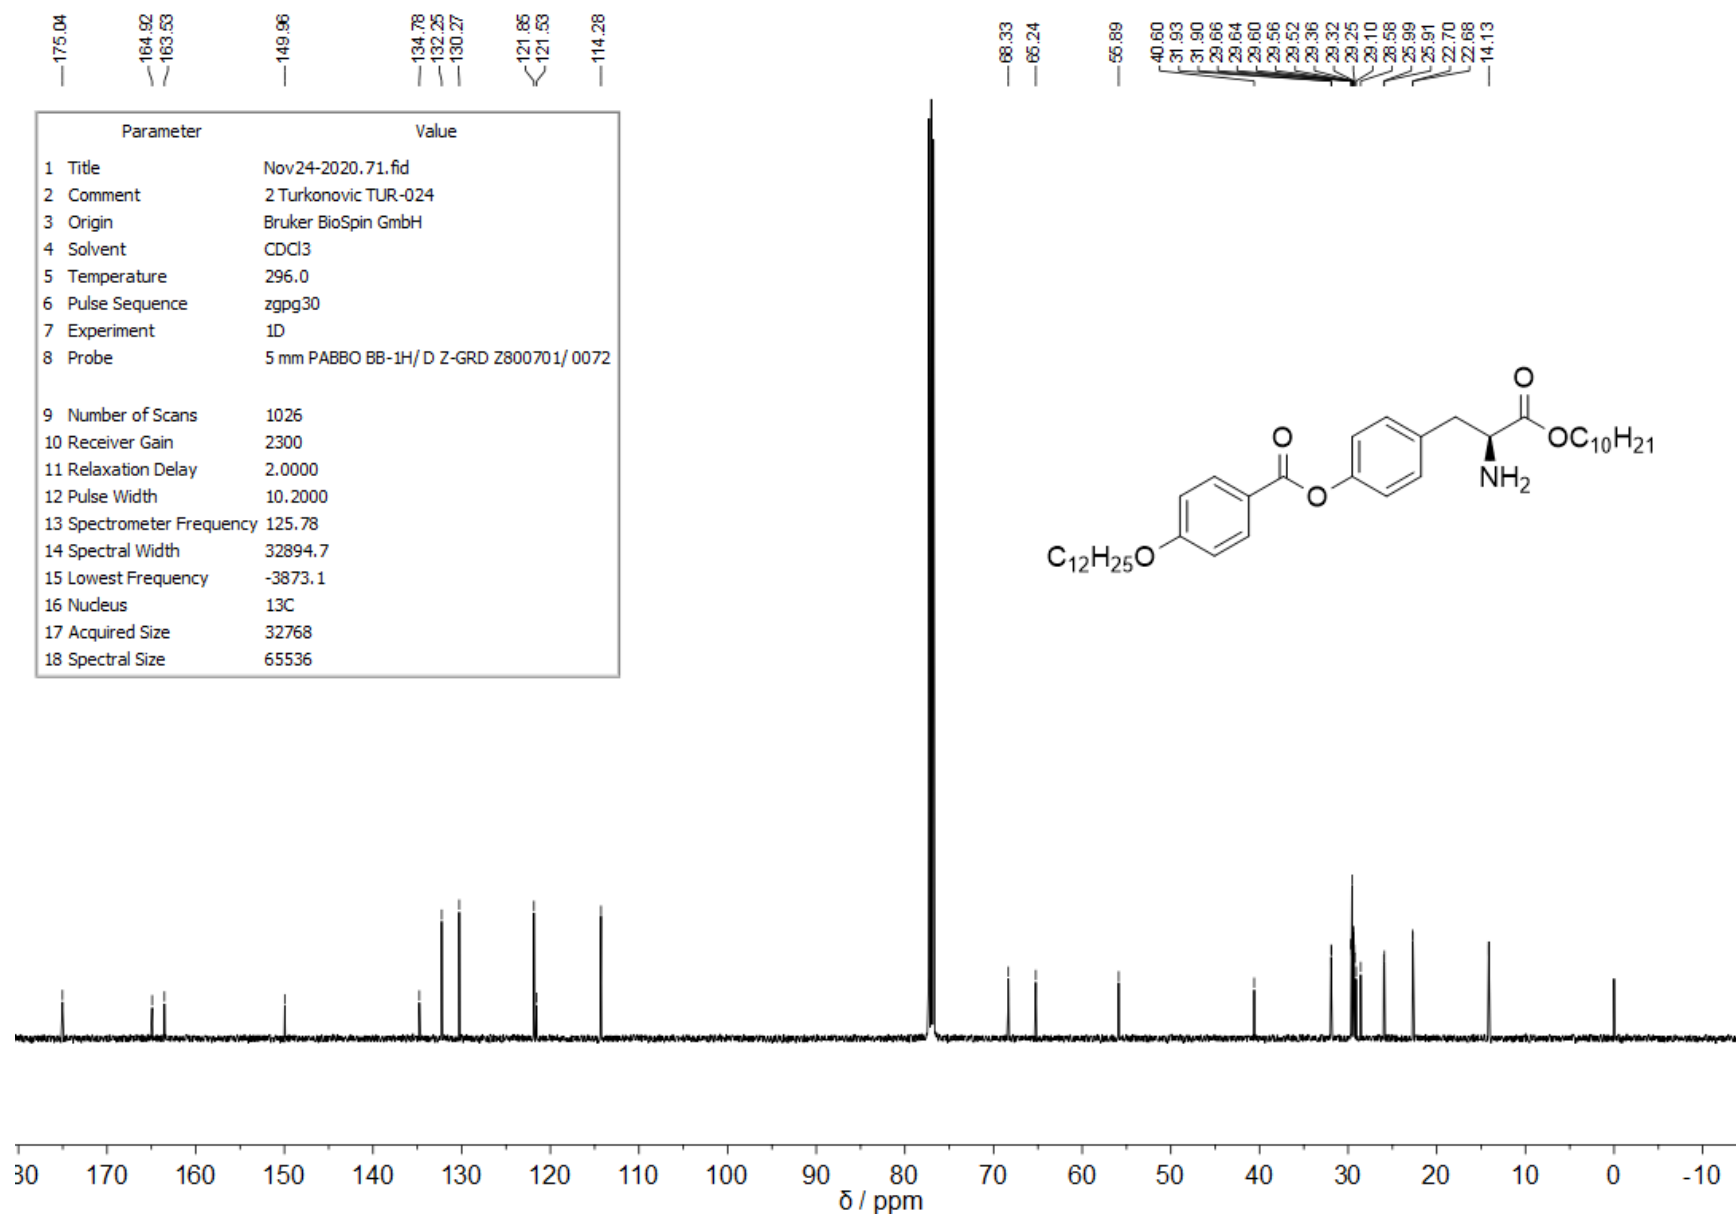

4-C<sub>14</sub>TyrC<sub>10</sub>NH<sub>2</sub>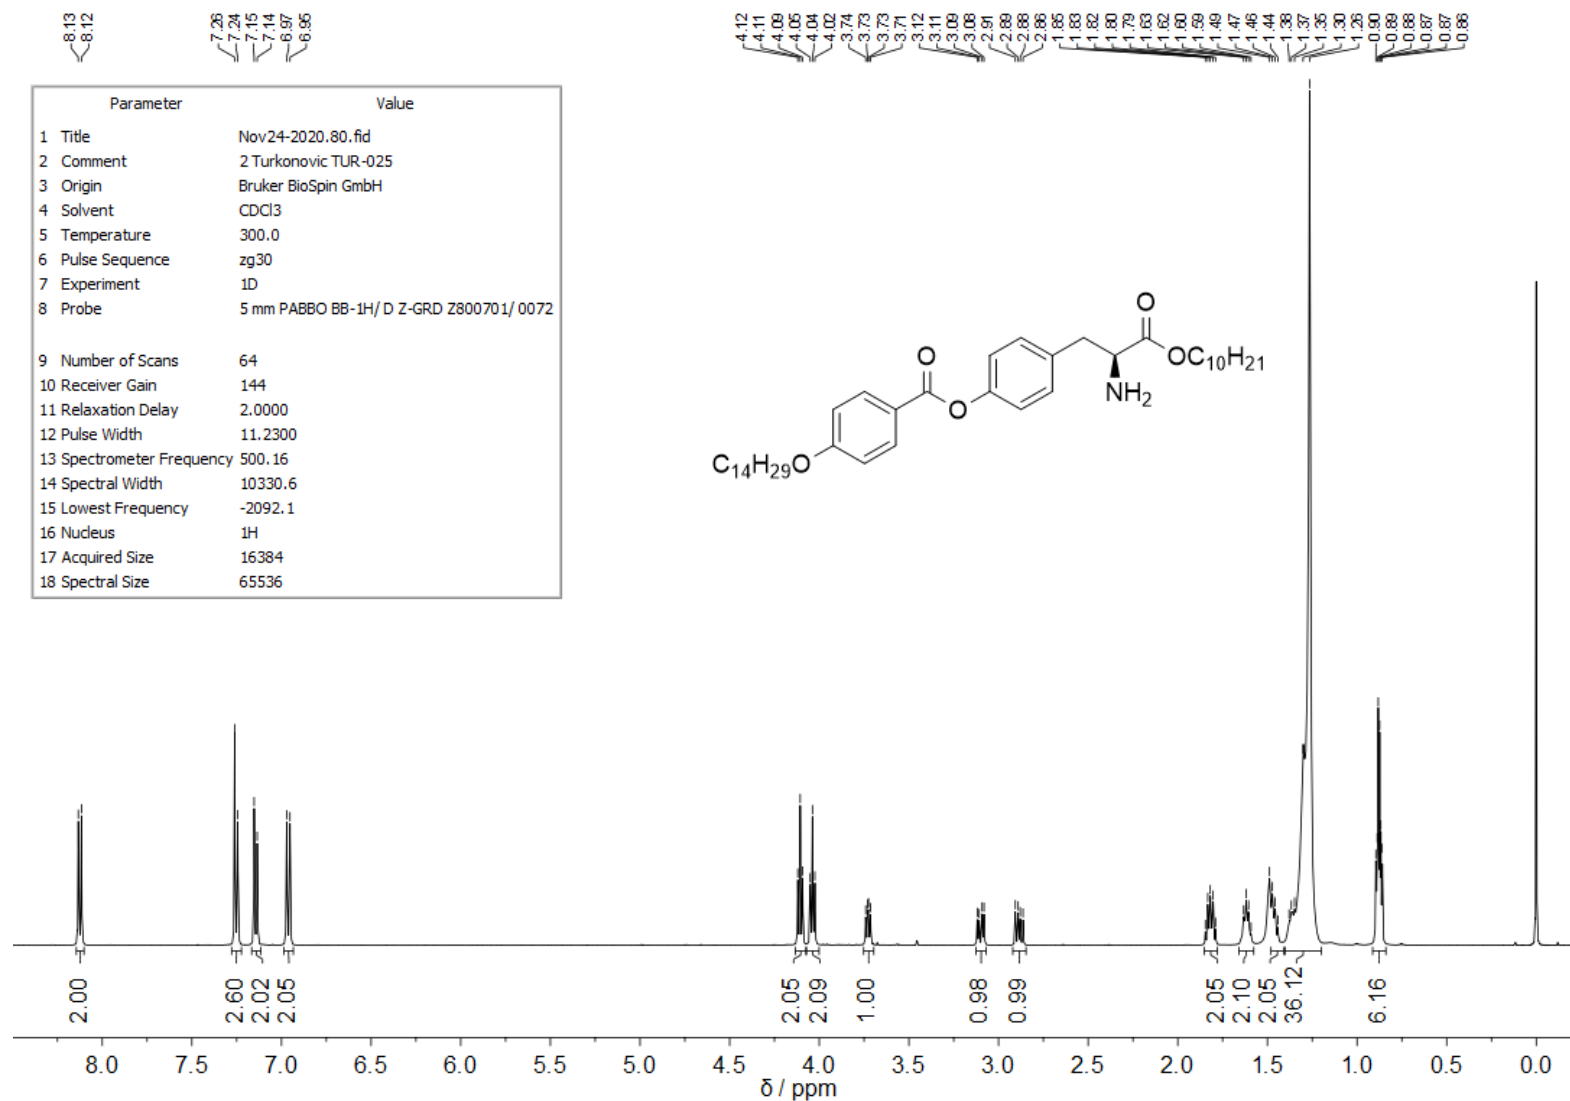

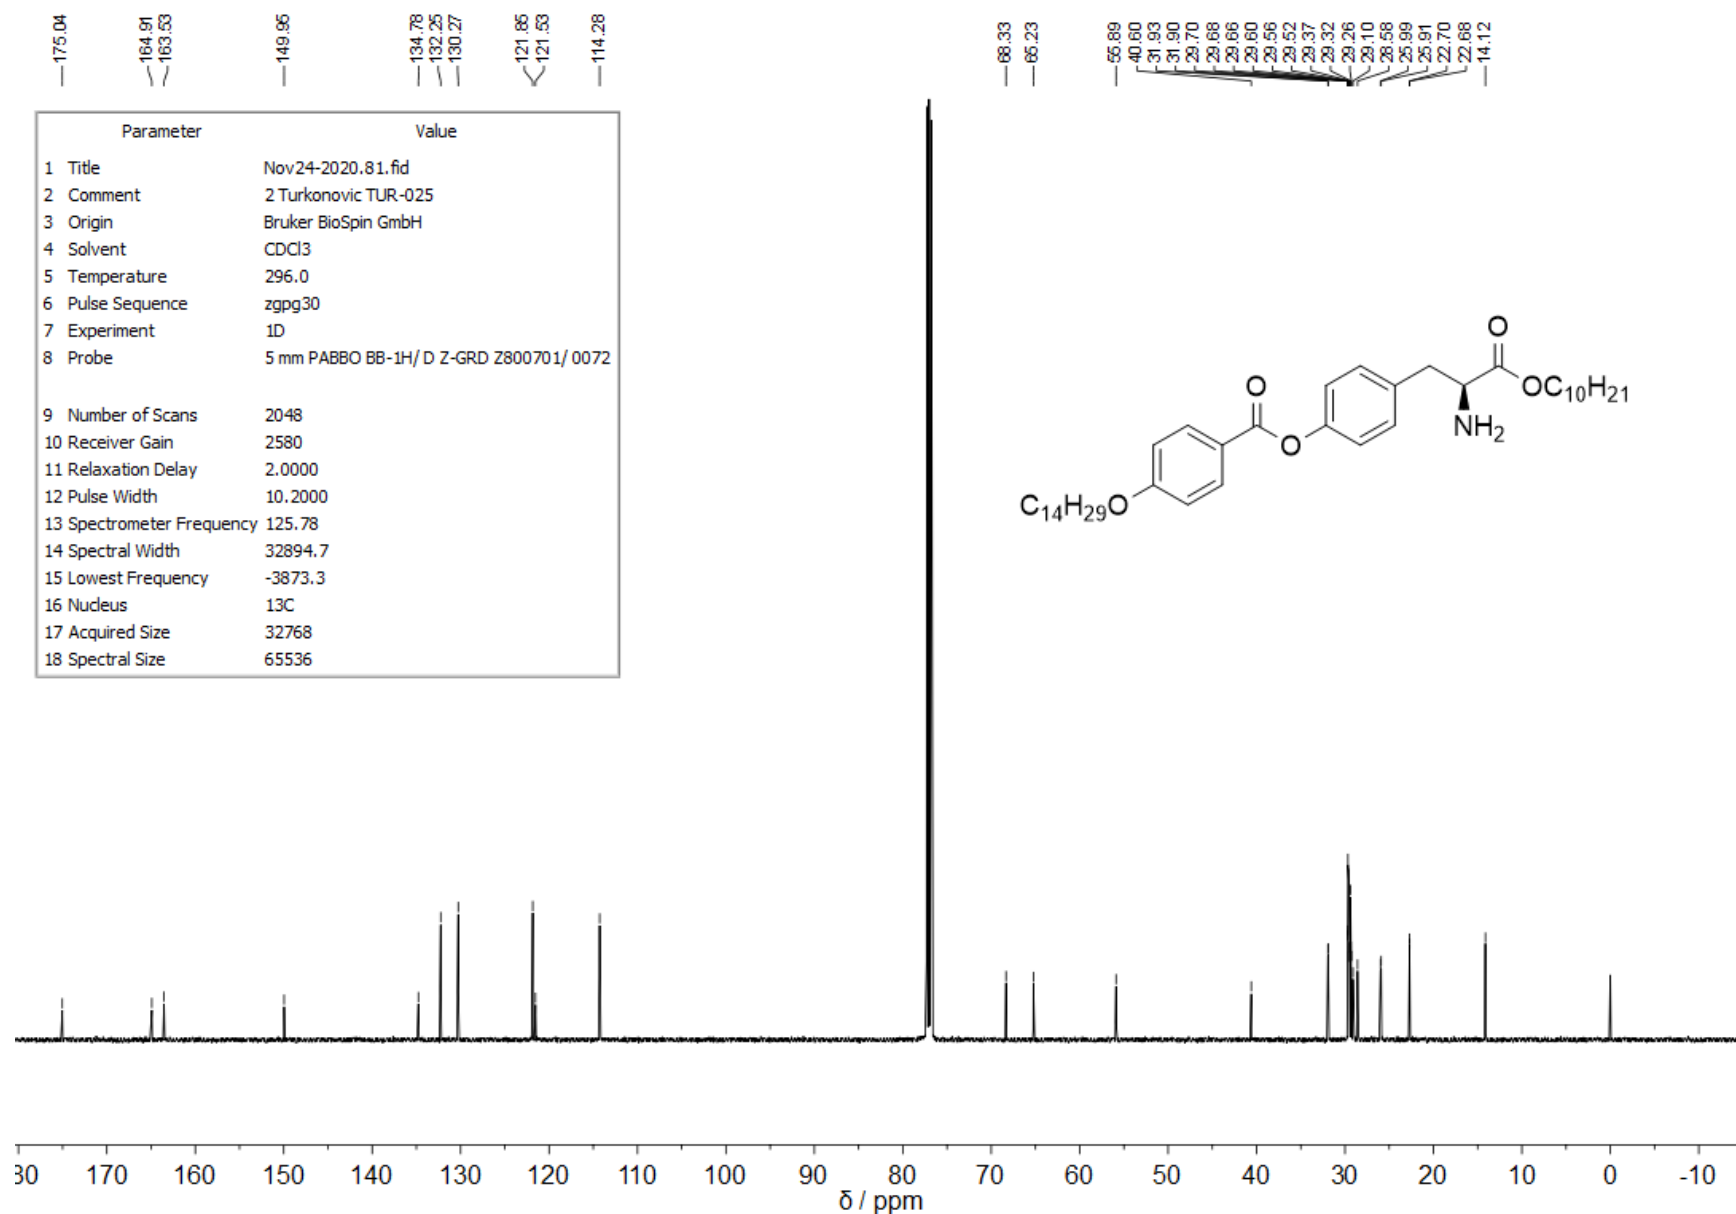

4-C<sub>10</sub>TyrC<sub>12</sub>NH<sub>2</sub>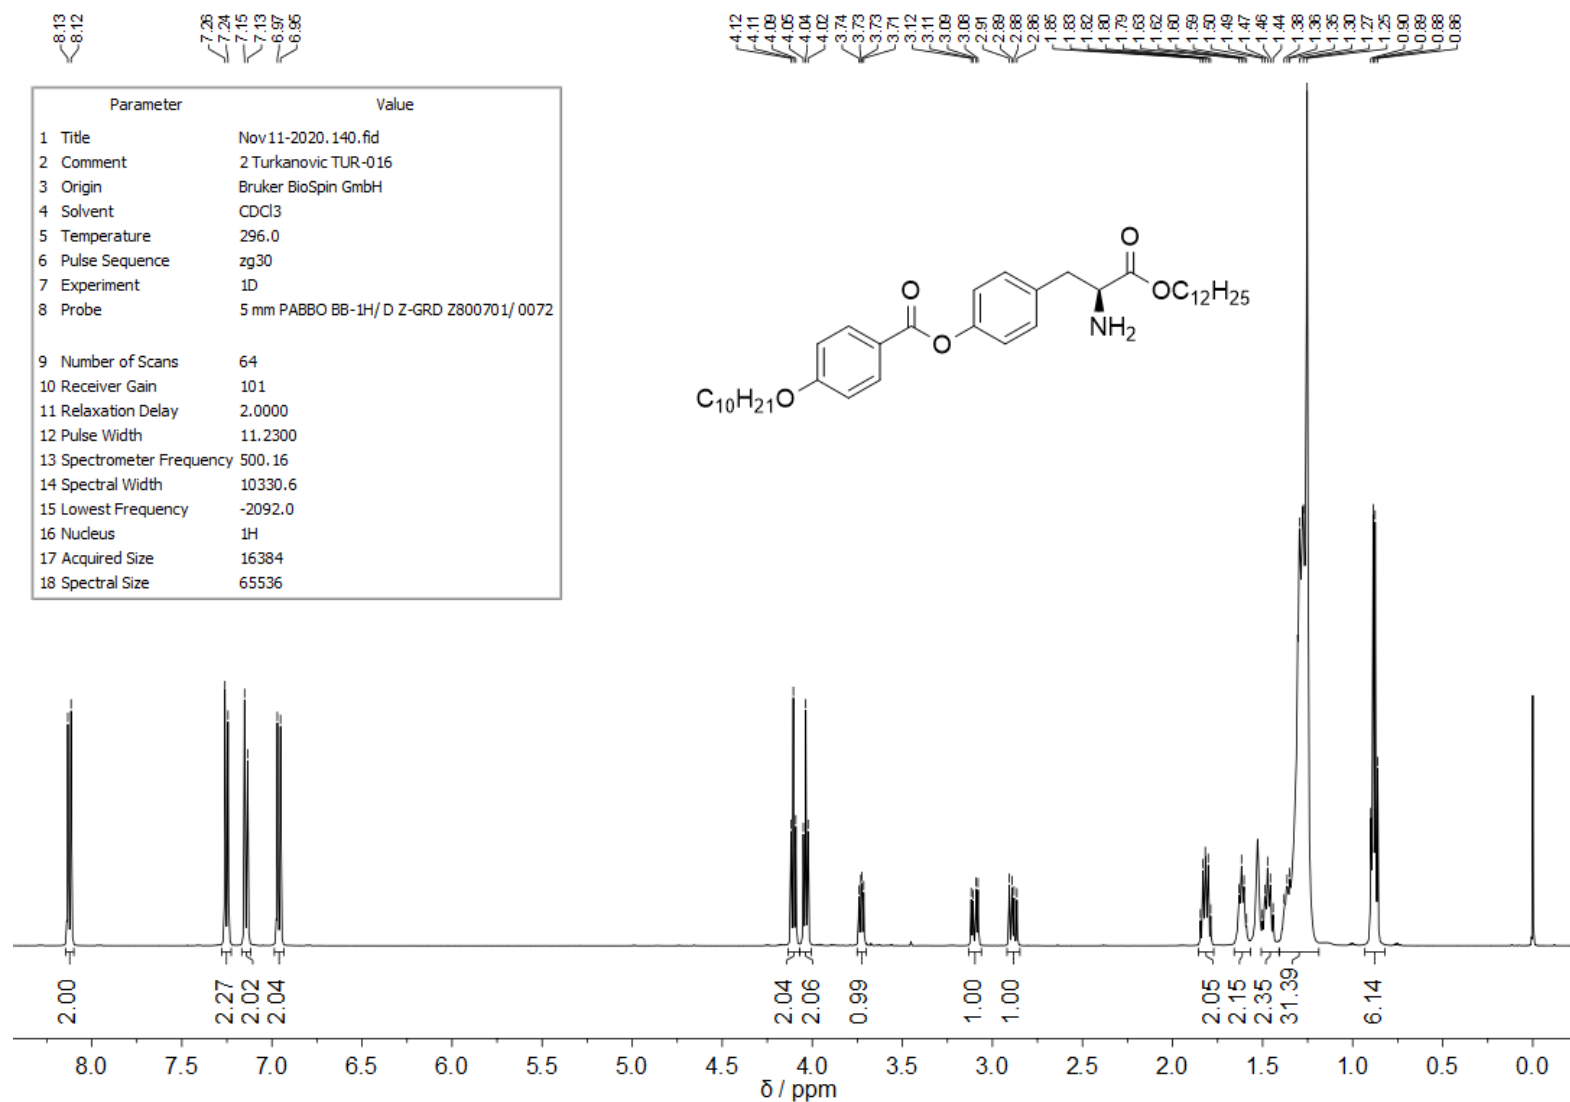

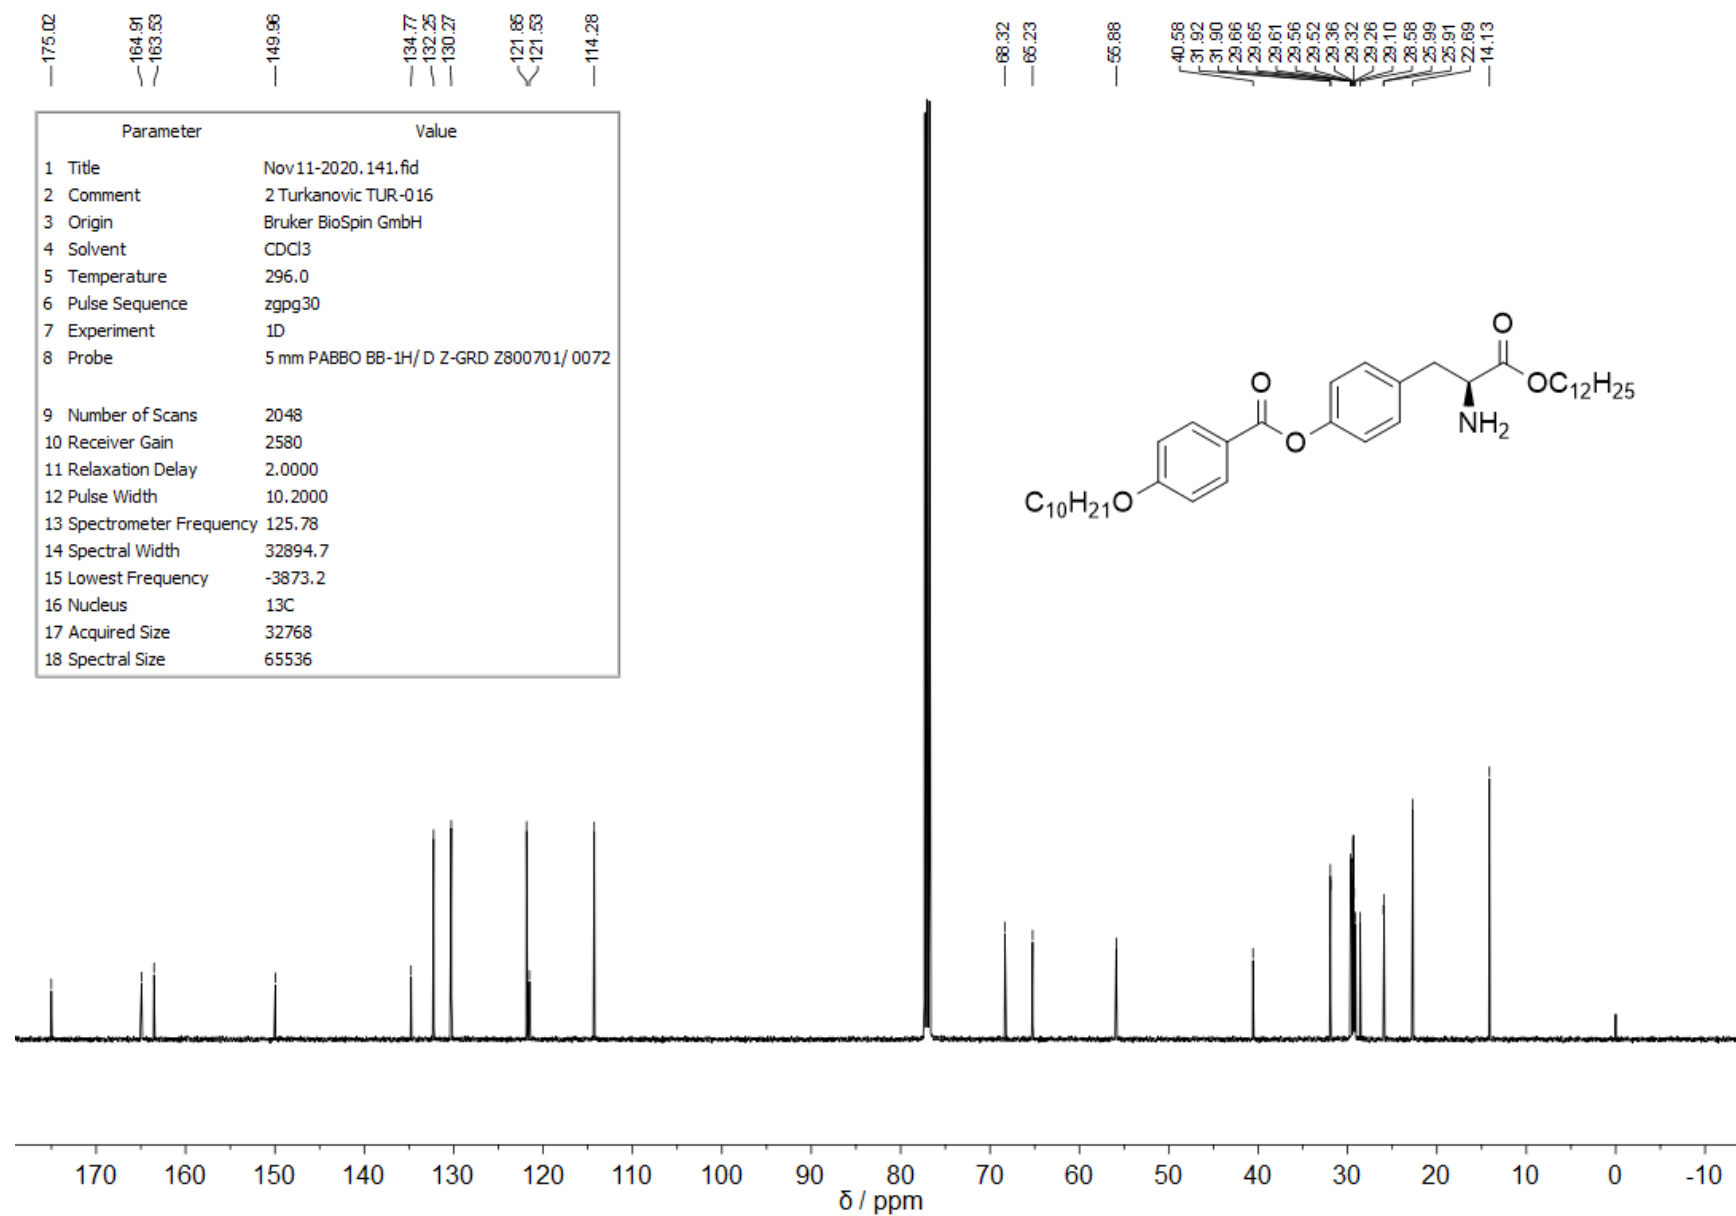

4-C<sub>12</sub>TyrC<sub>12</sub>NH<sub>2</sub>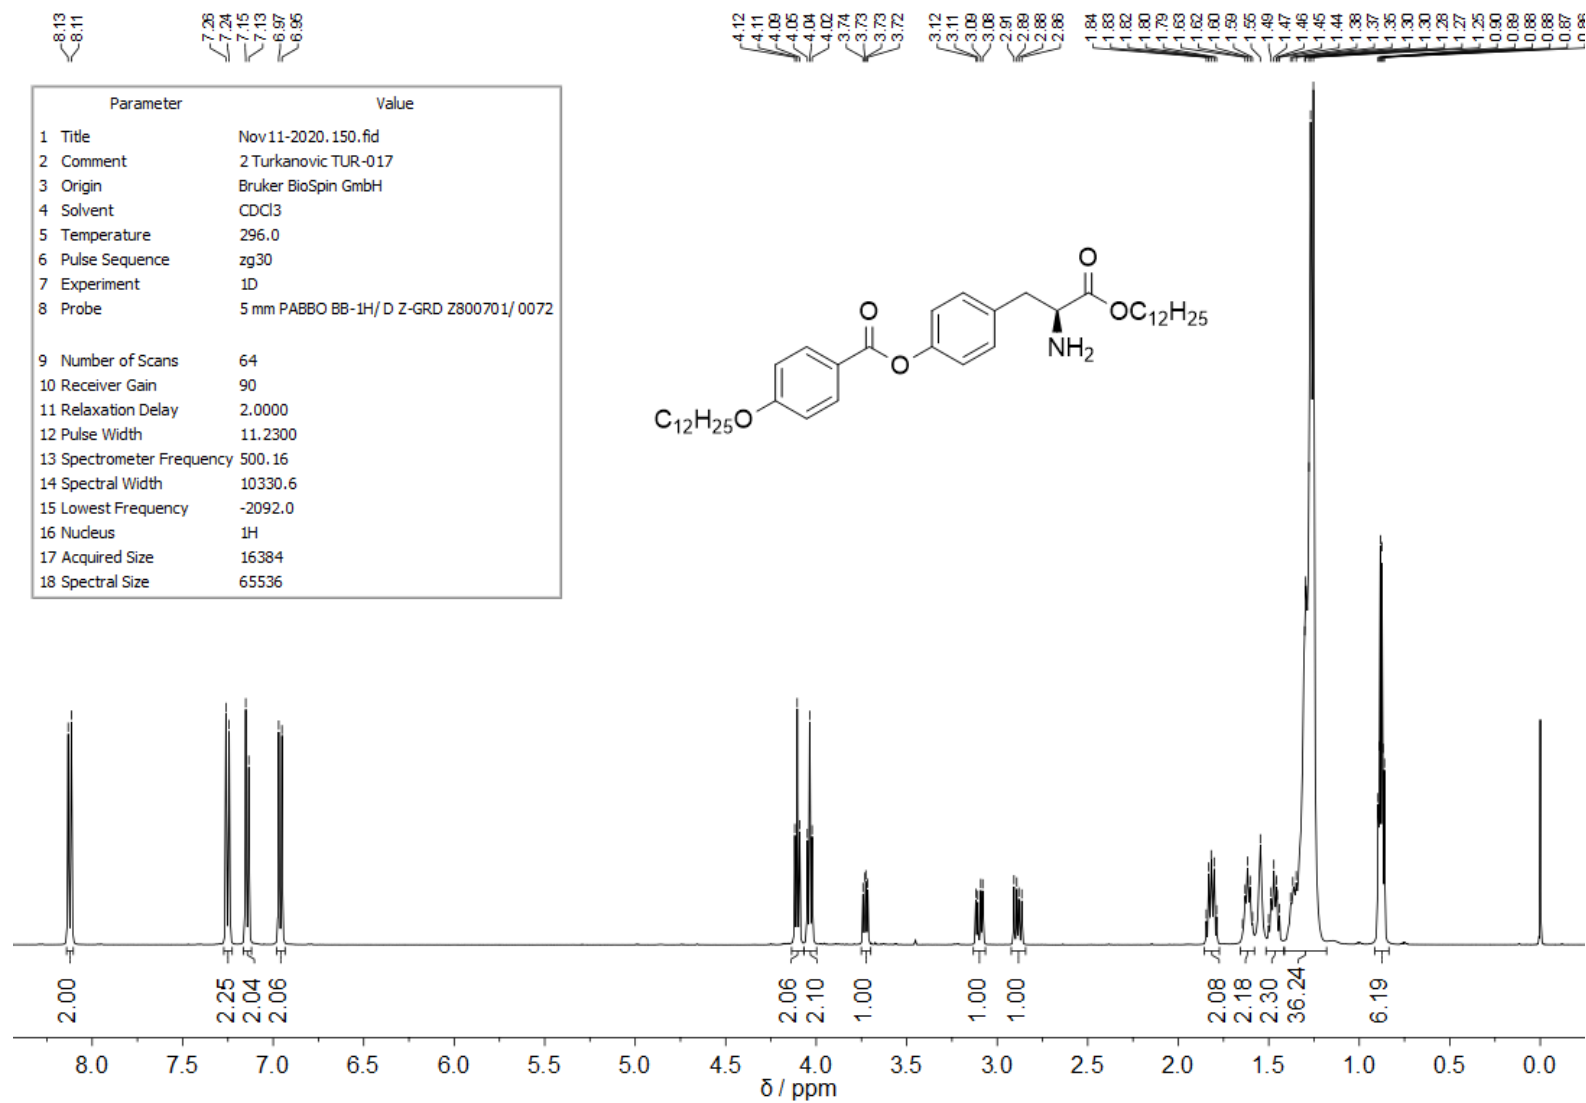

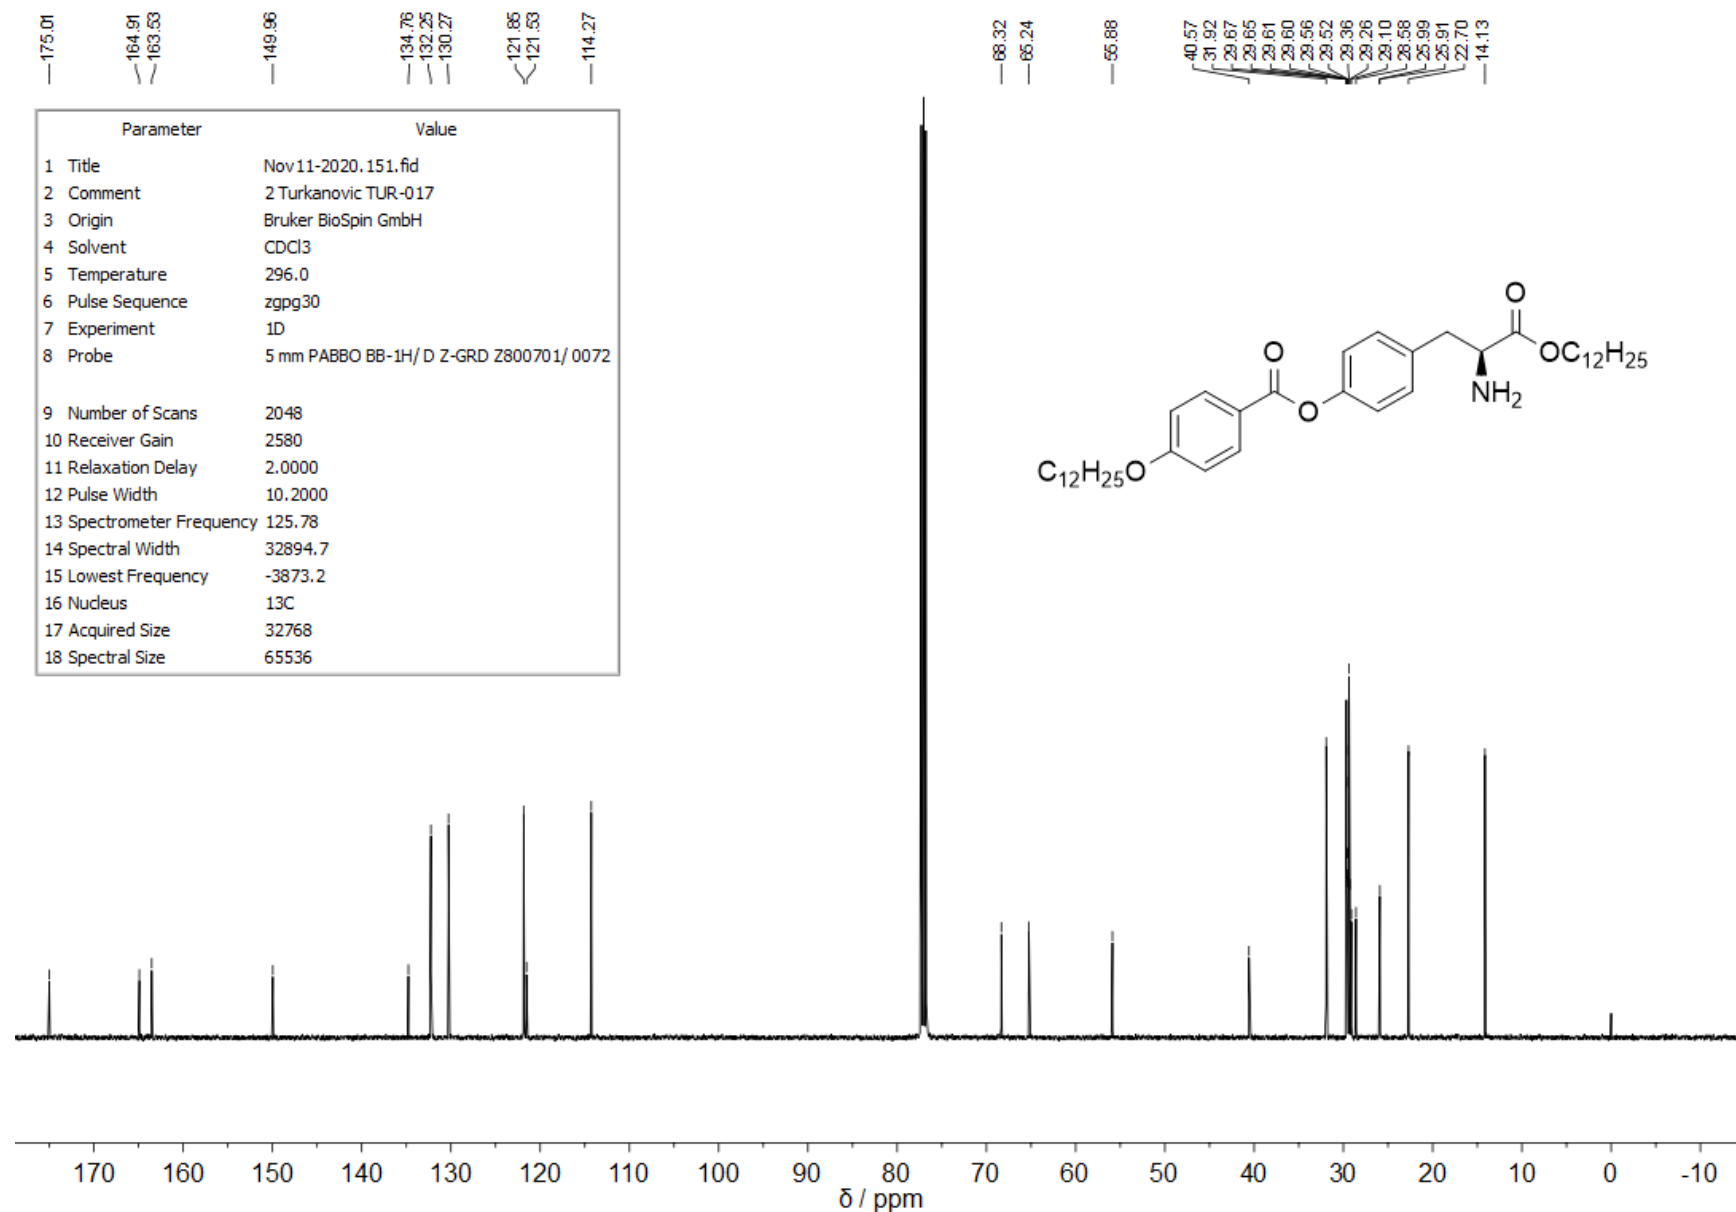

4-C<sub>14</sub>TyrC<sub>12</sub>NH<sub>2</sub>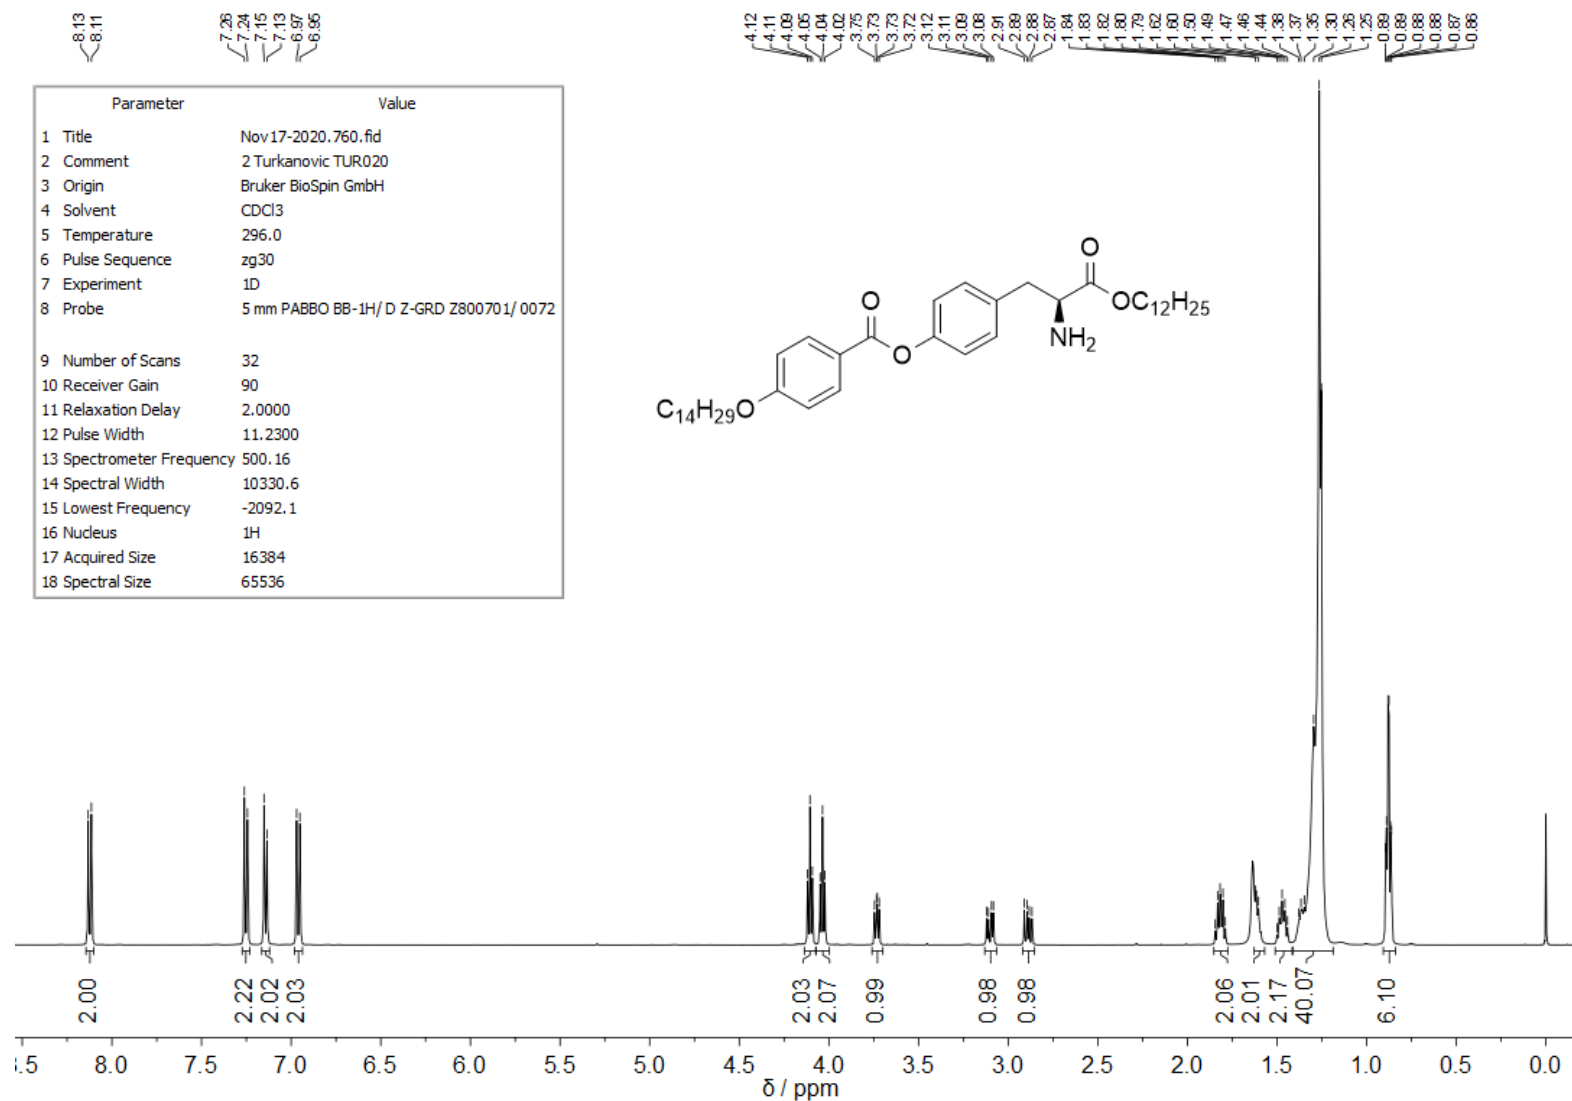



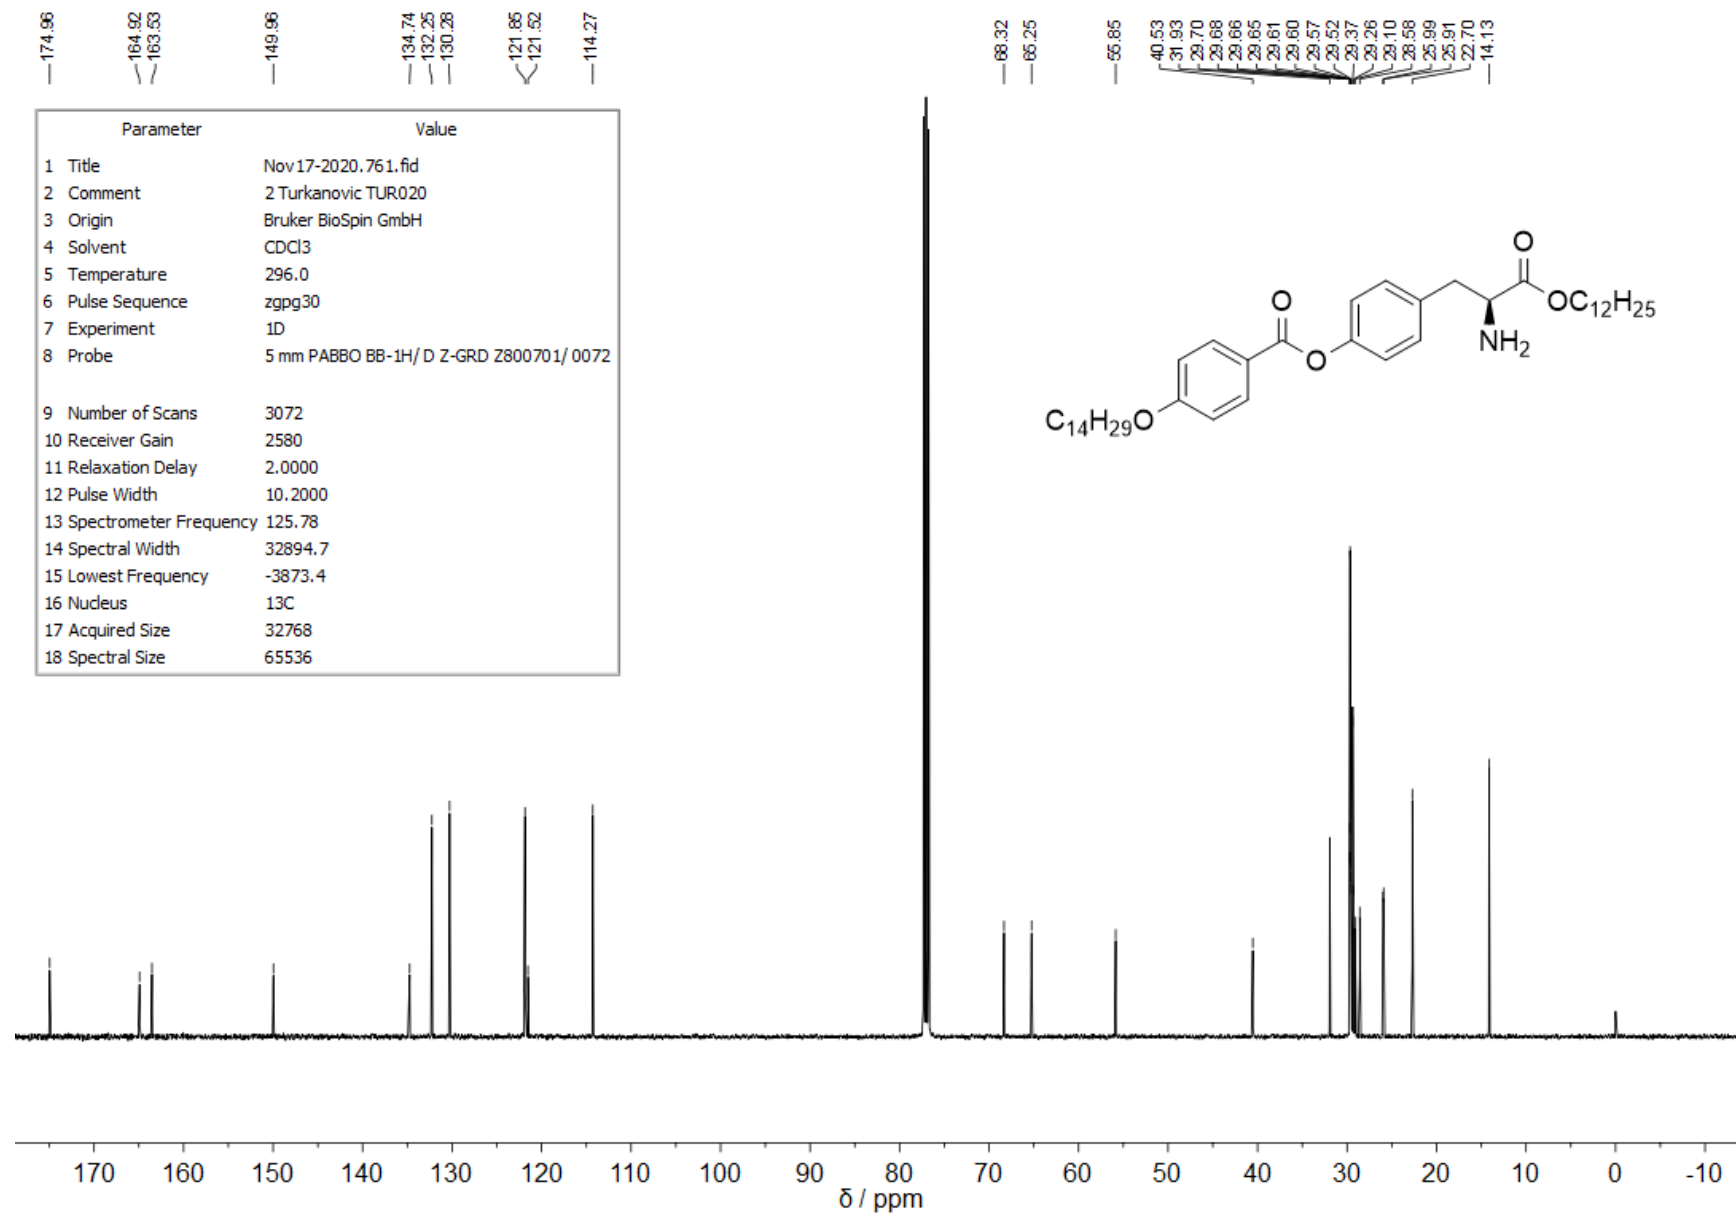

4-C<sub>10</sub>TyrC<sub>14</sub>NH<sub>2</sub>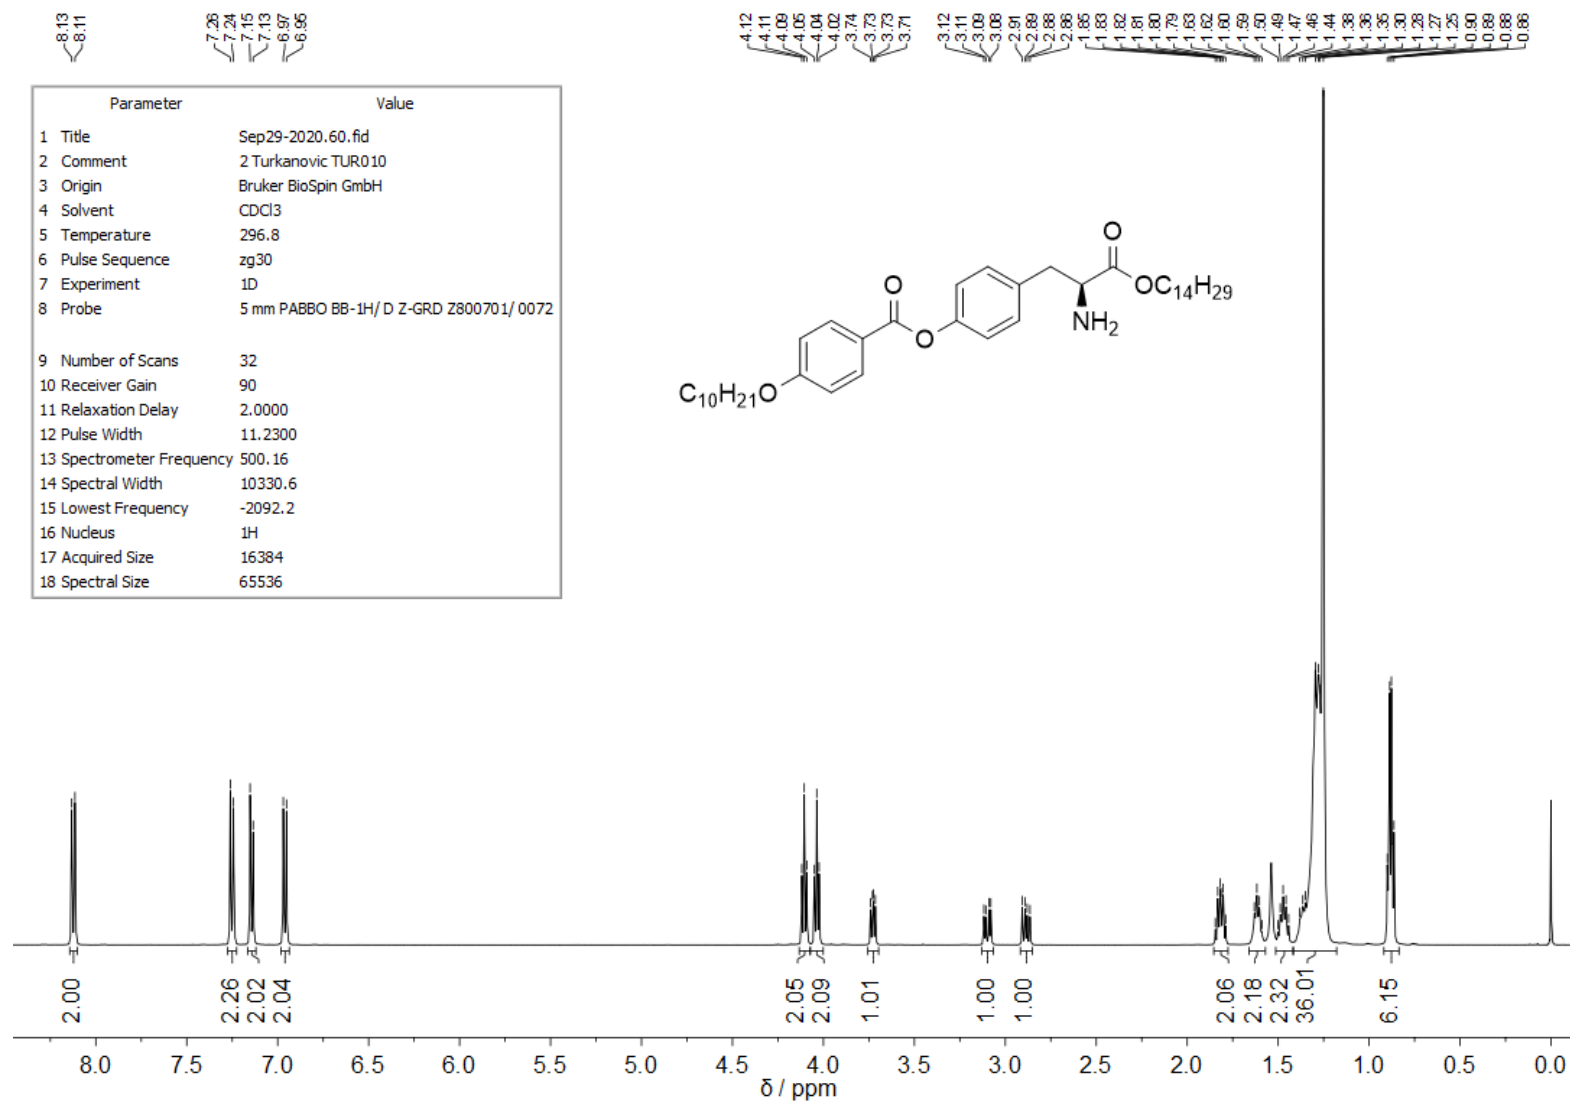

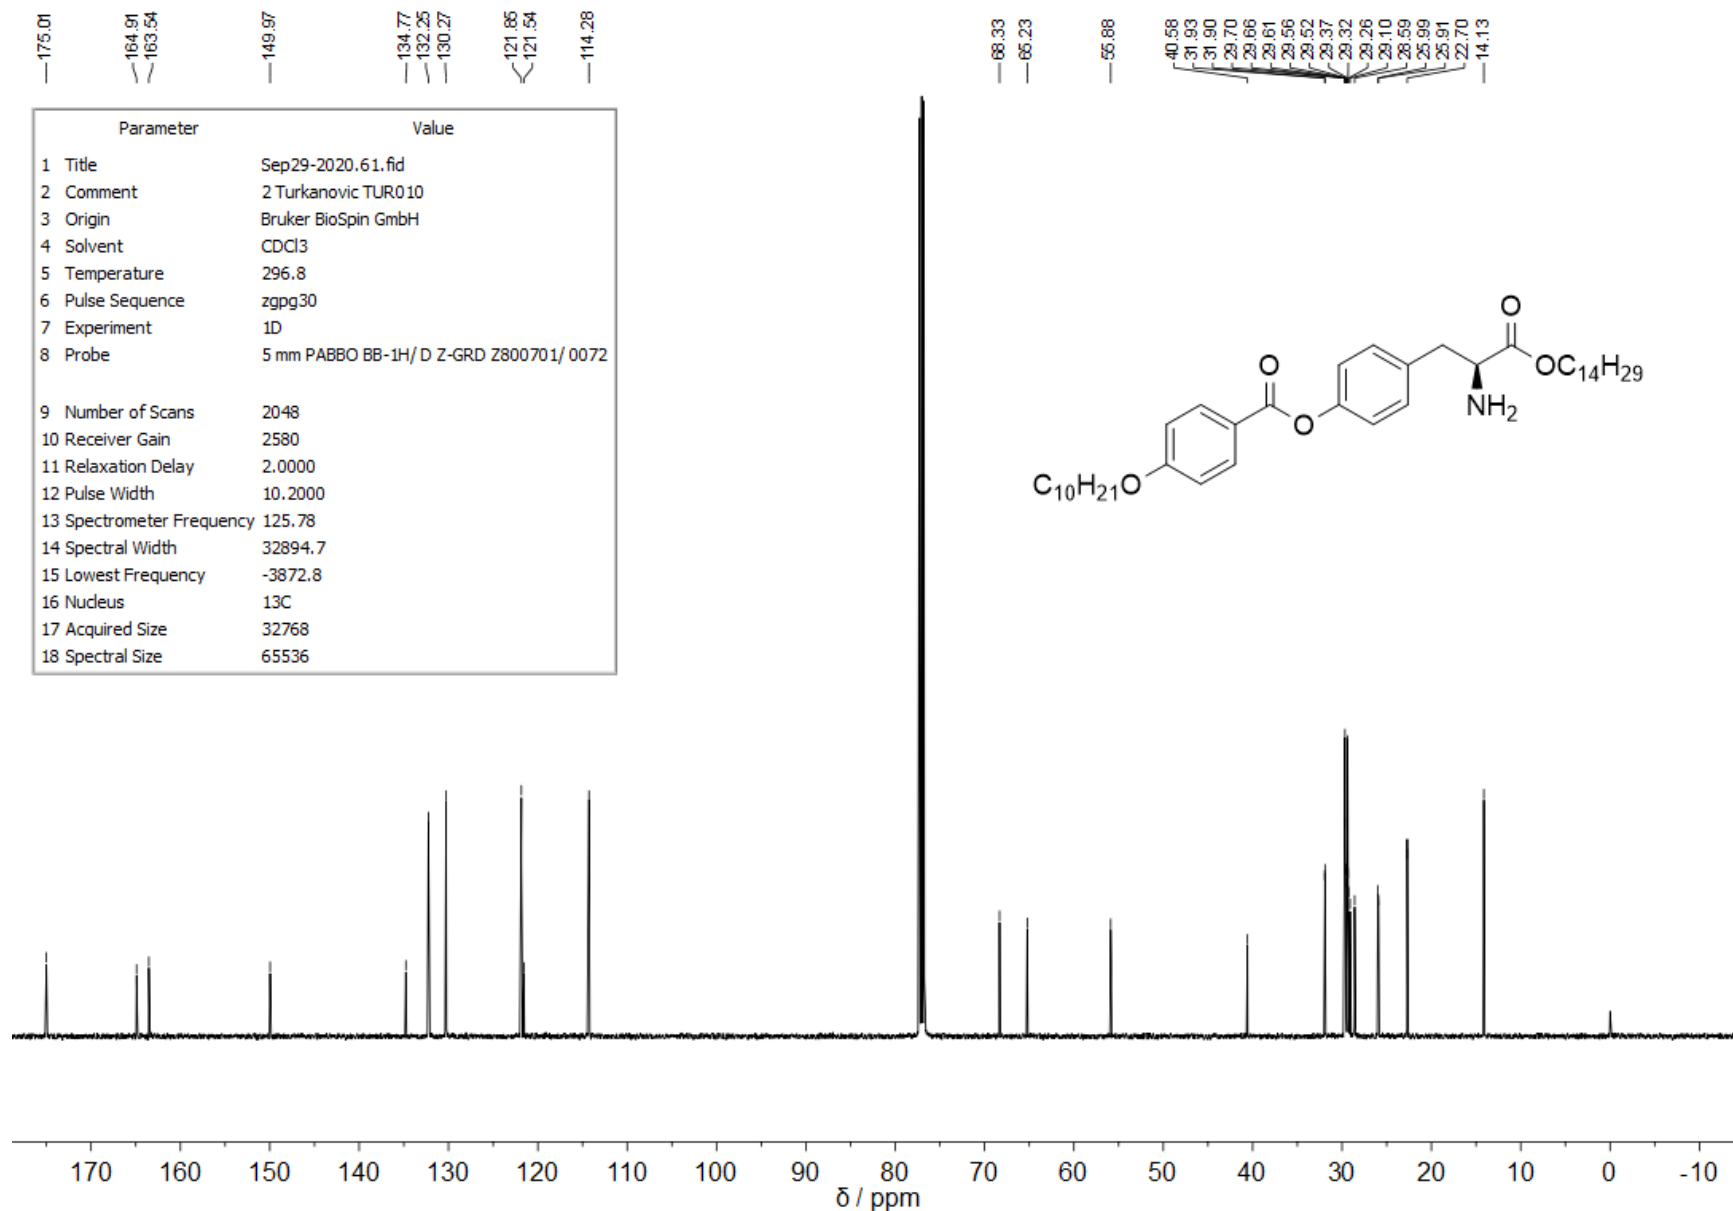

4-C<sub>12</sub>TyrC<sub>14</sub>NH<sub>2</sub>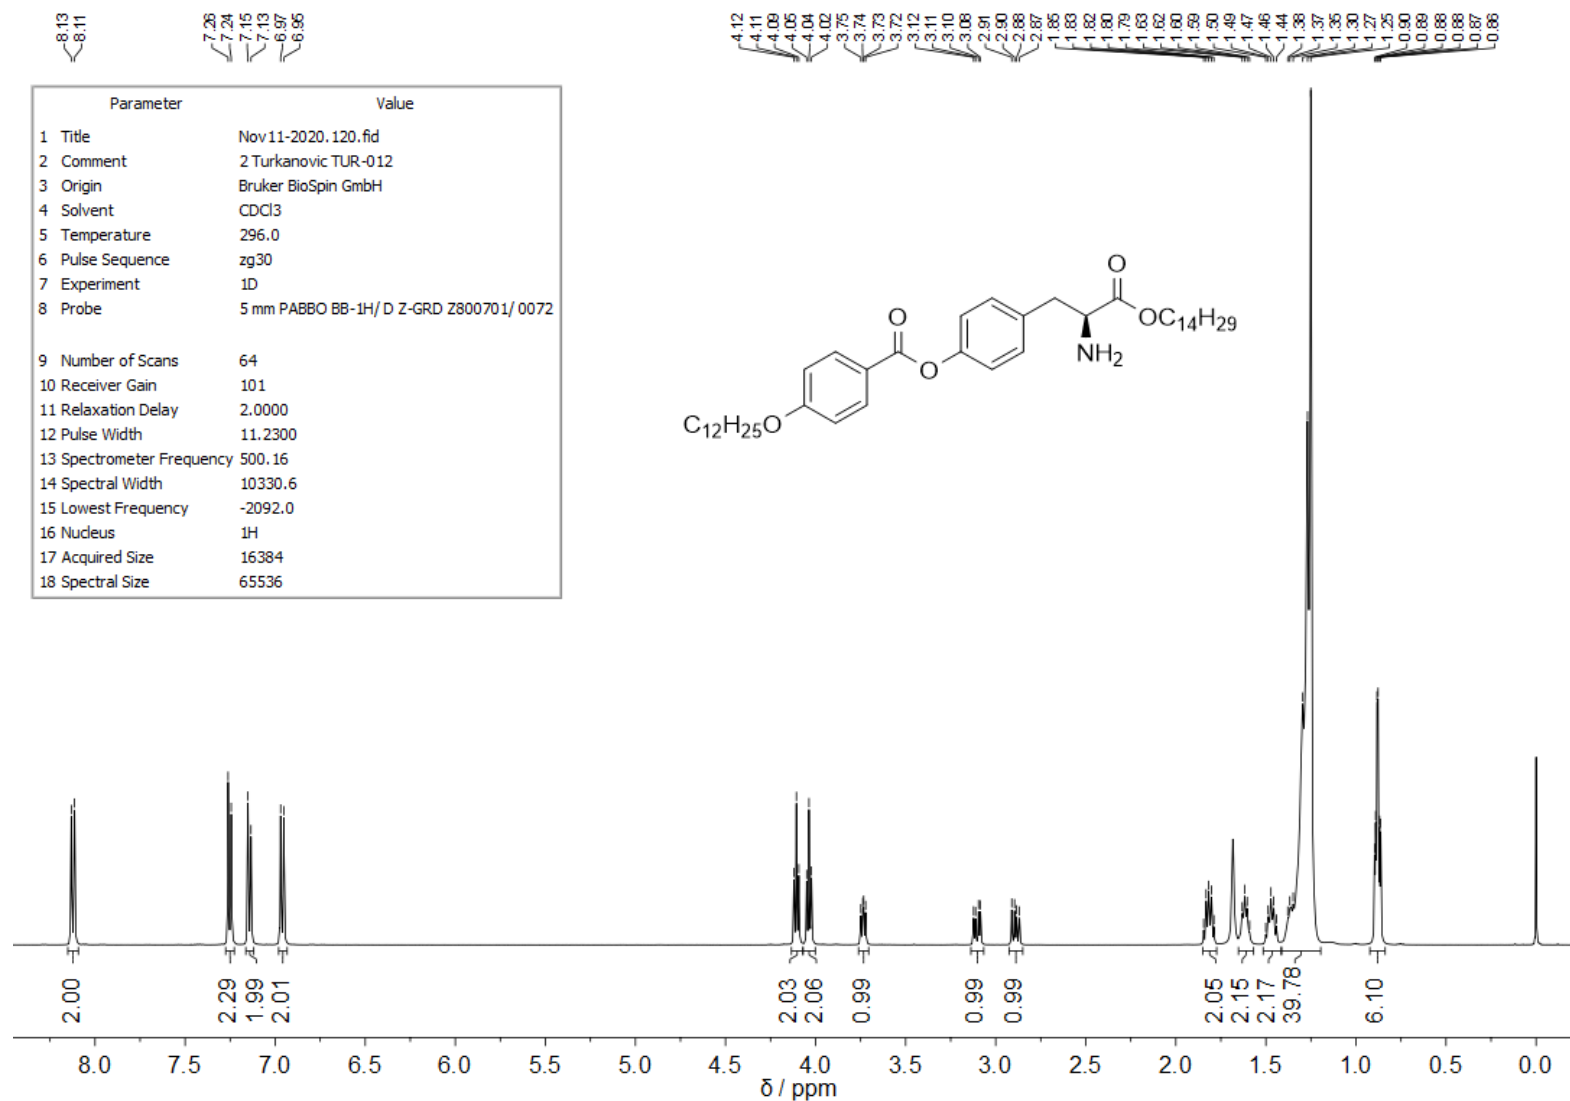

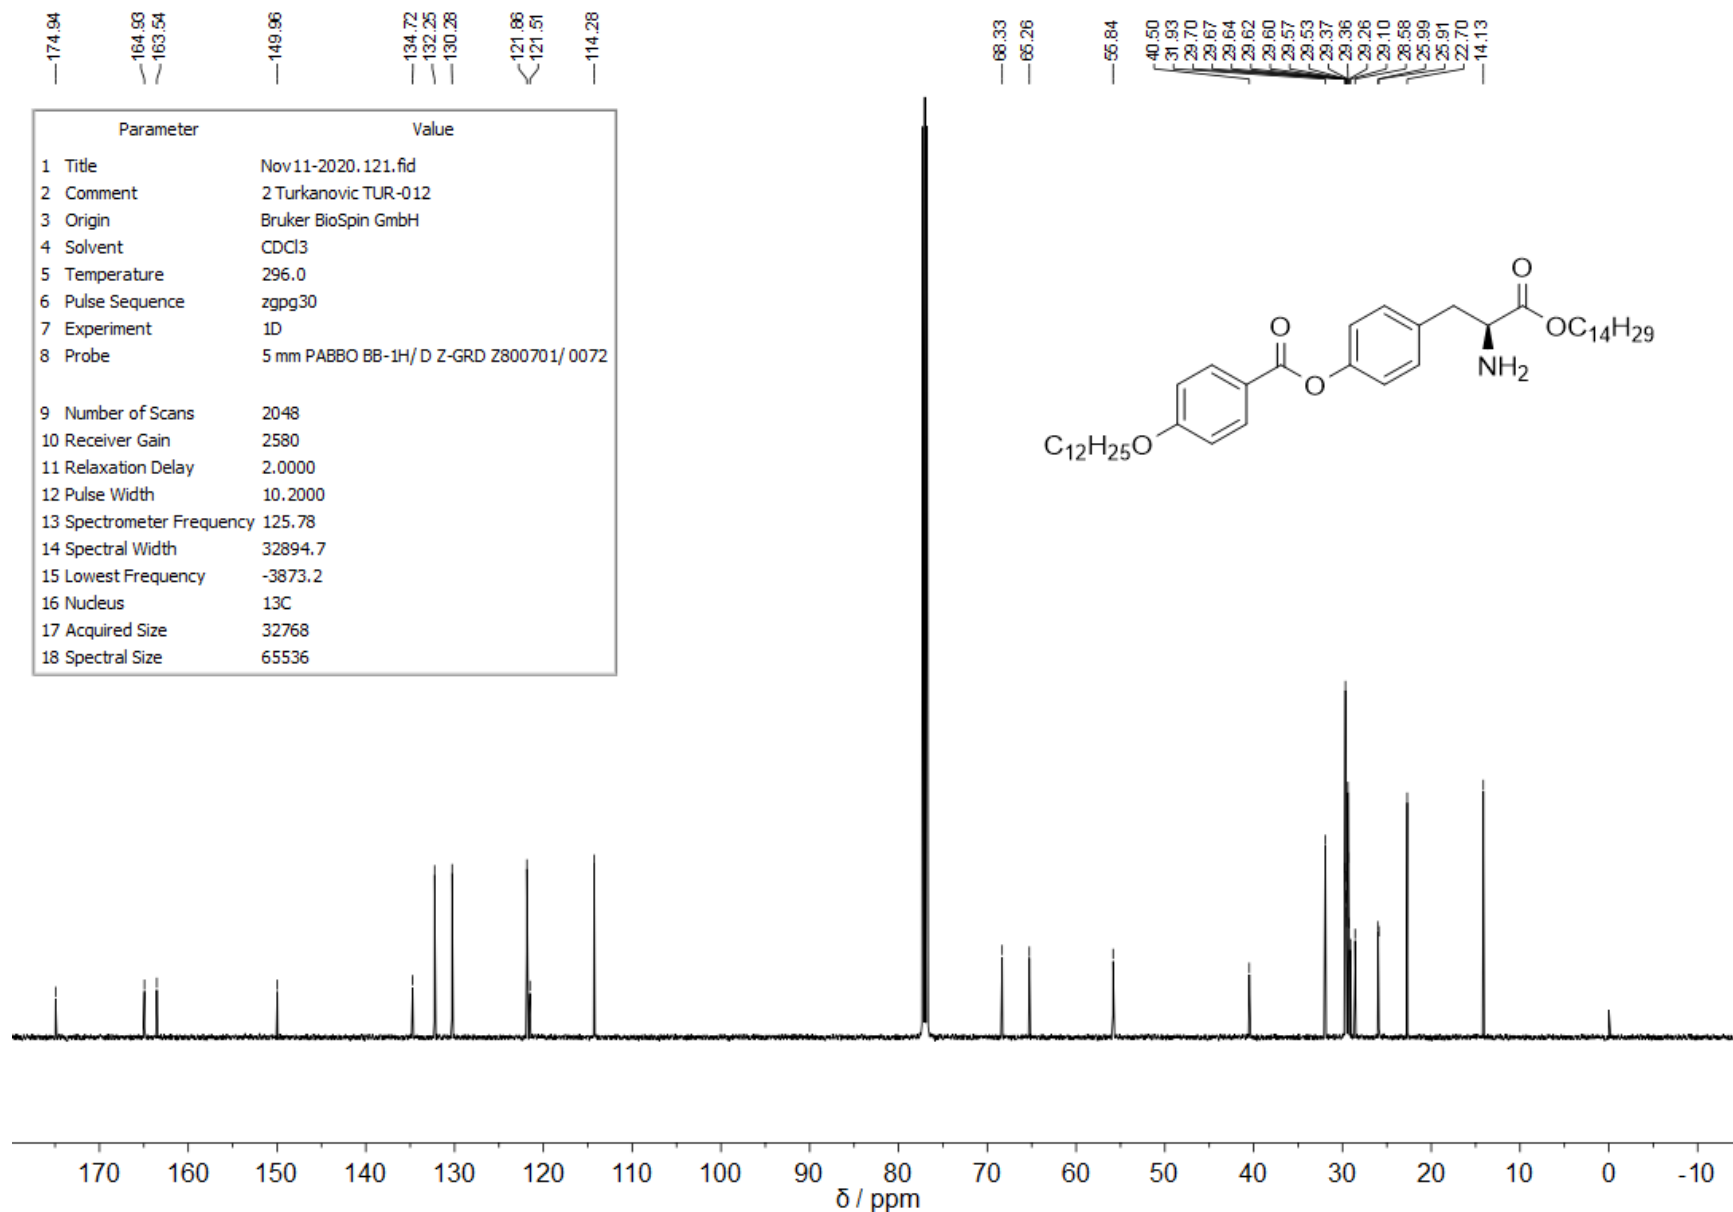

4-C<sub>14</sub>TyrC<sub>14</sub>NH<sub>2</sub>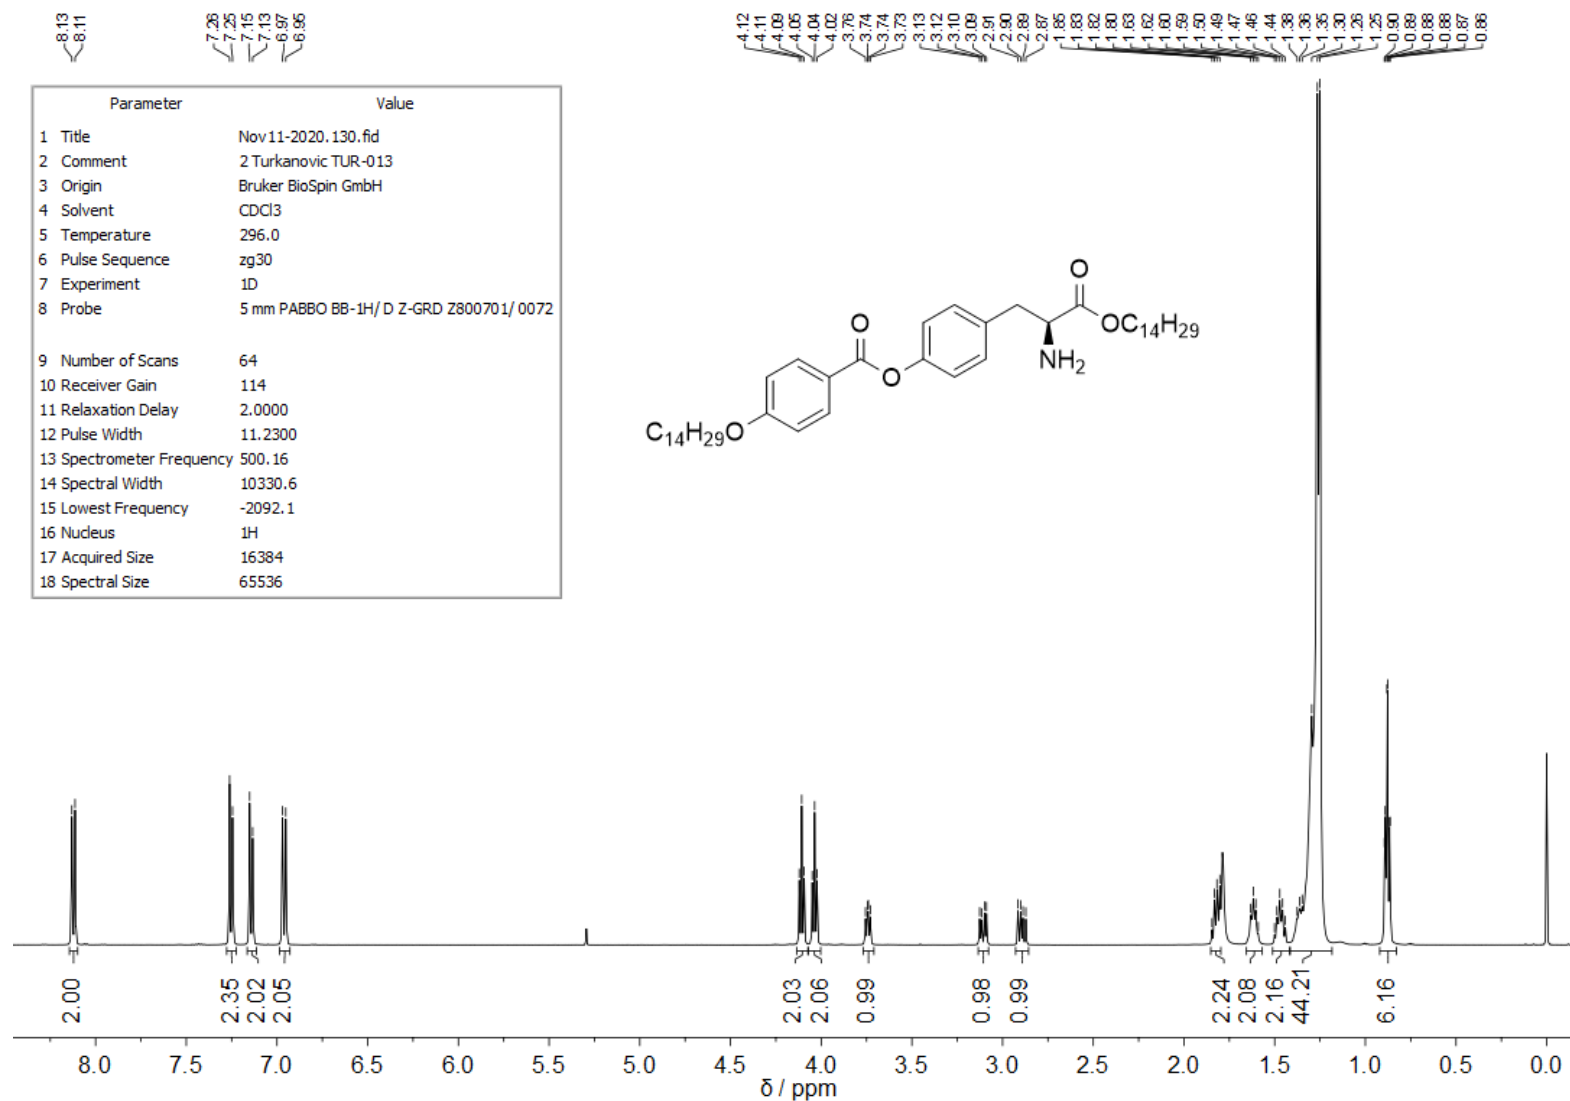

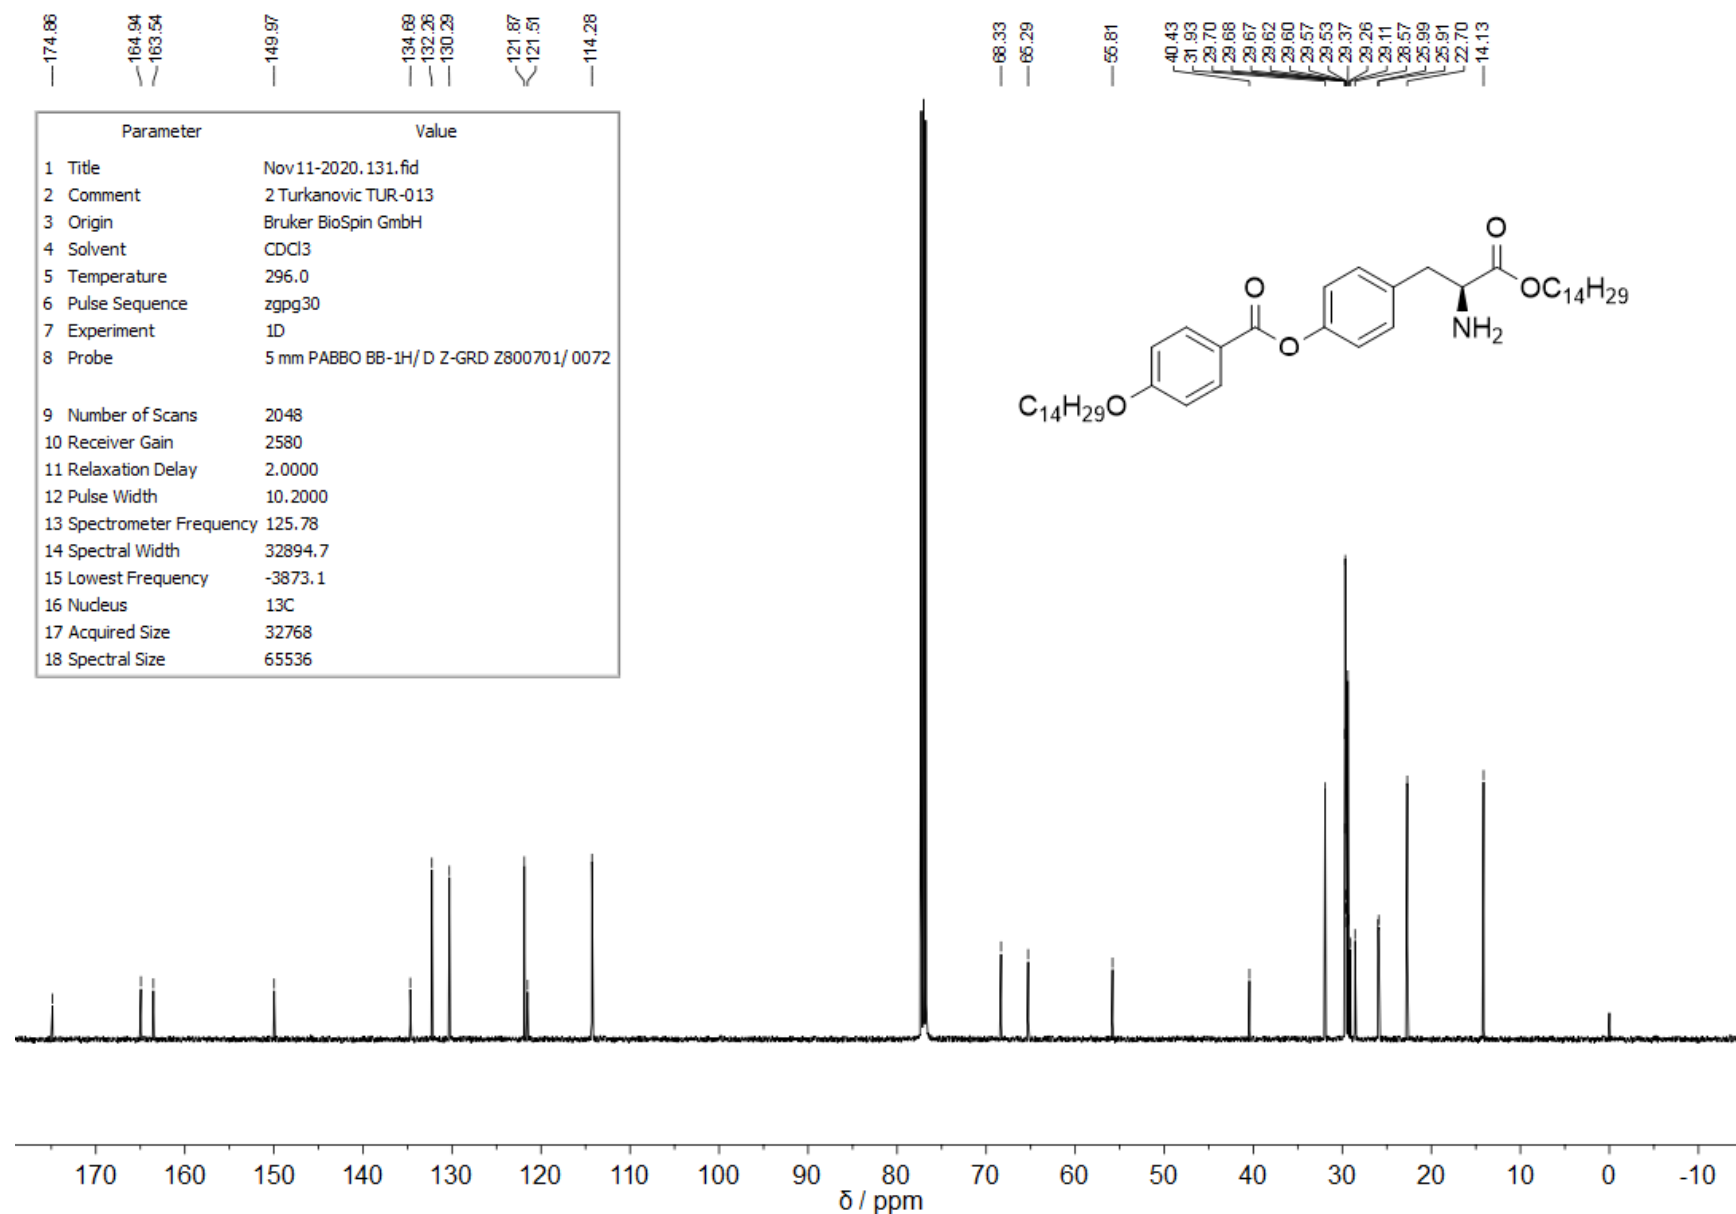

3,4-C<sub>10</sub>TyrC<sub>10</sub>NH<sub>2</sub>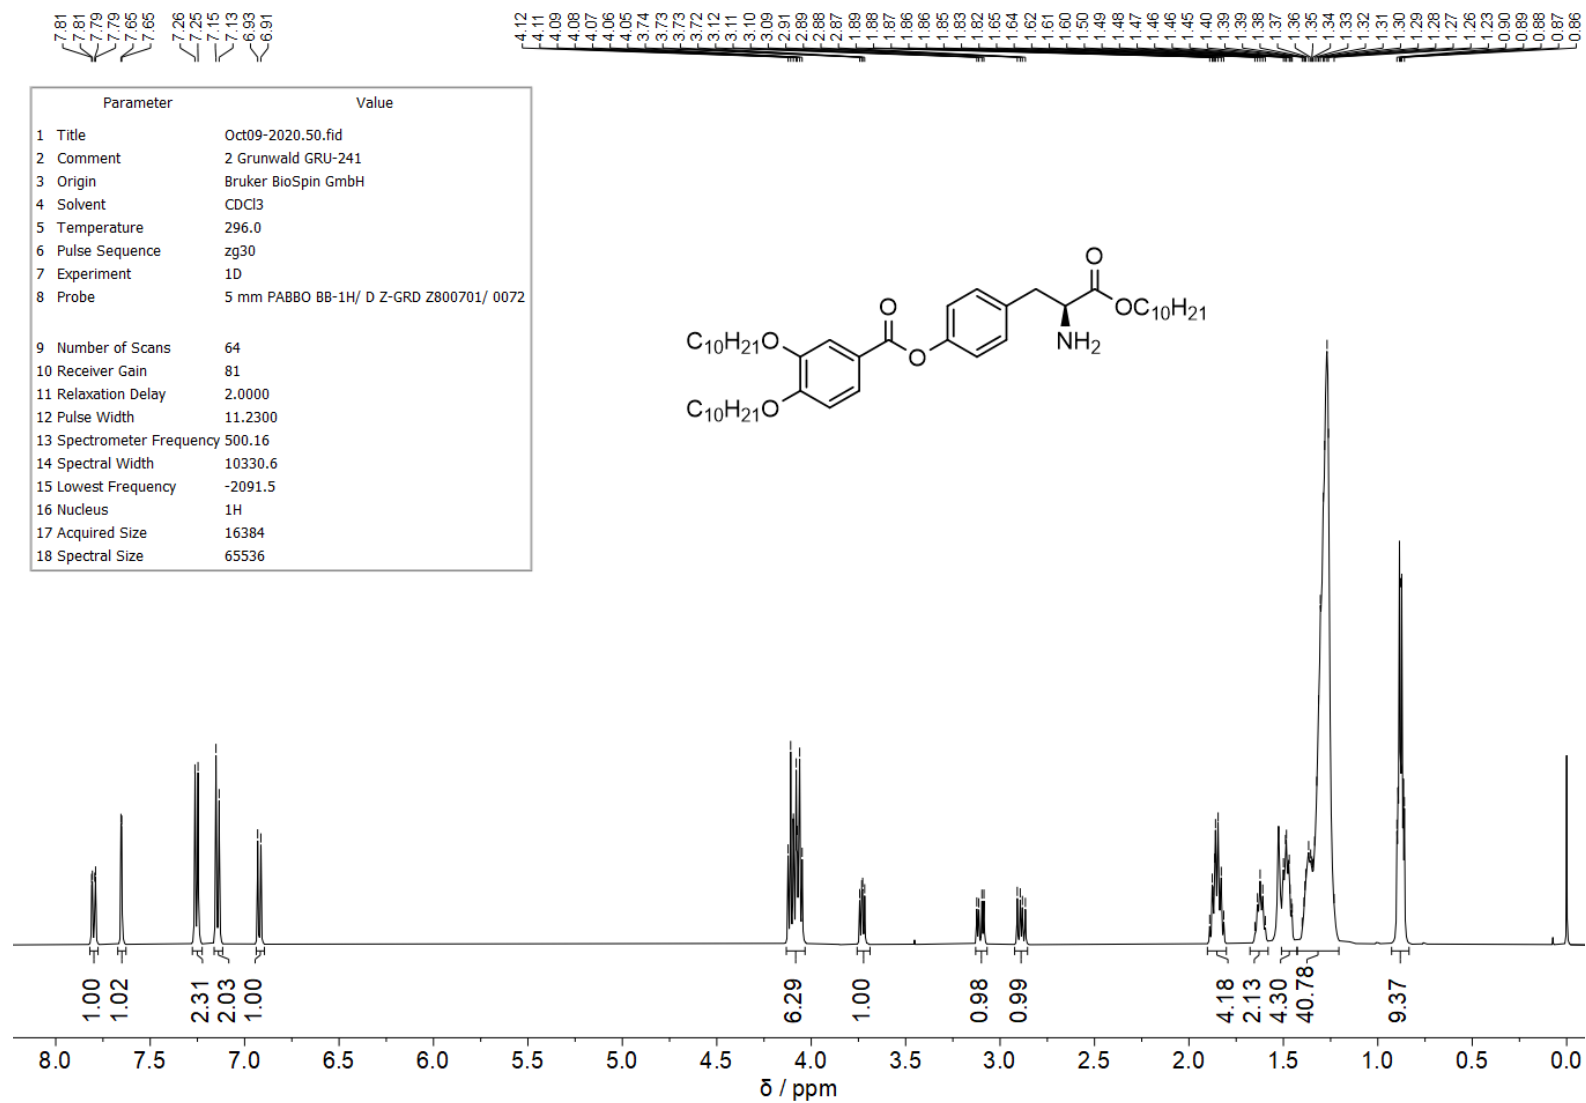



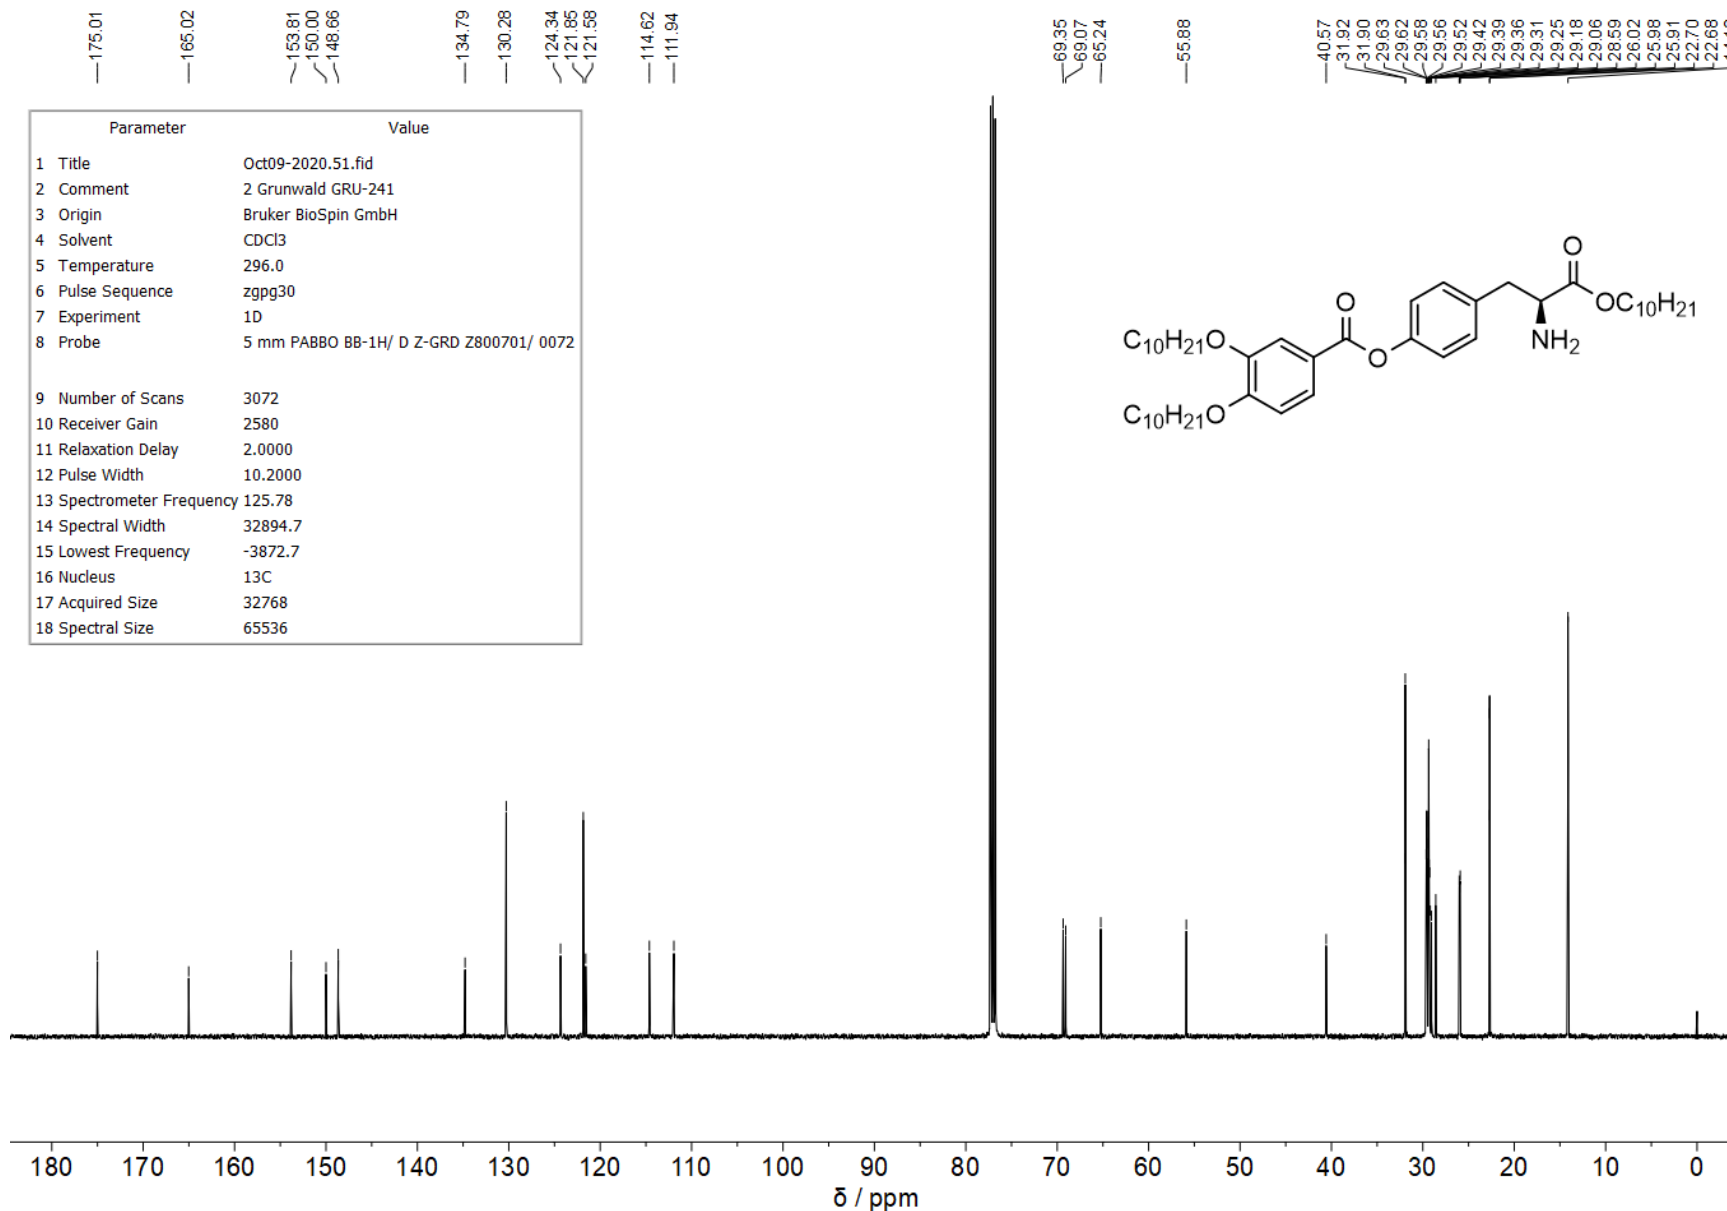

3,4-C<sub>12</sub>TyrC<sub>10</sub>NH<sub>2</sub>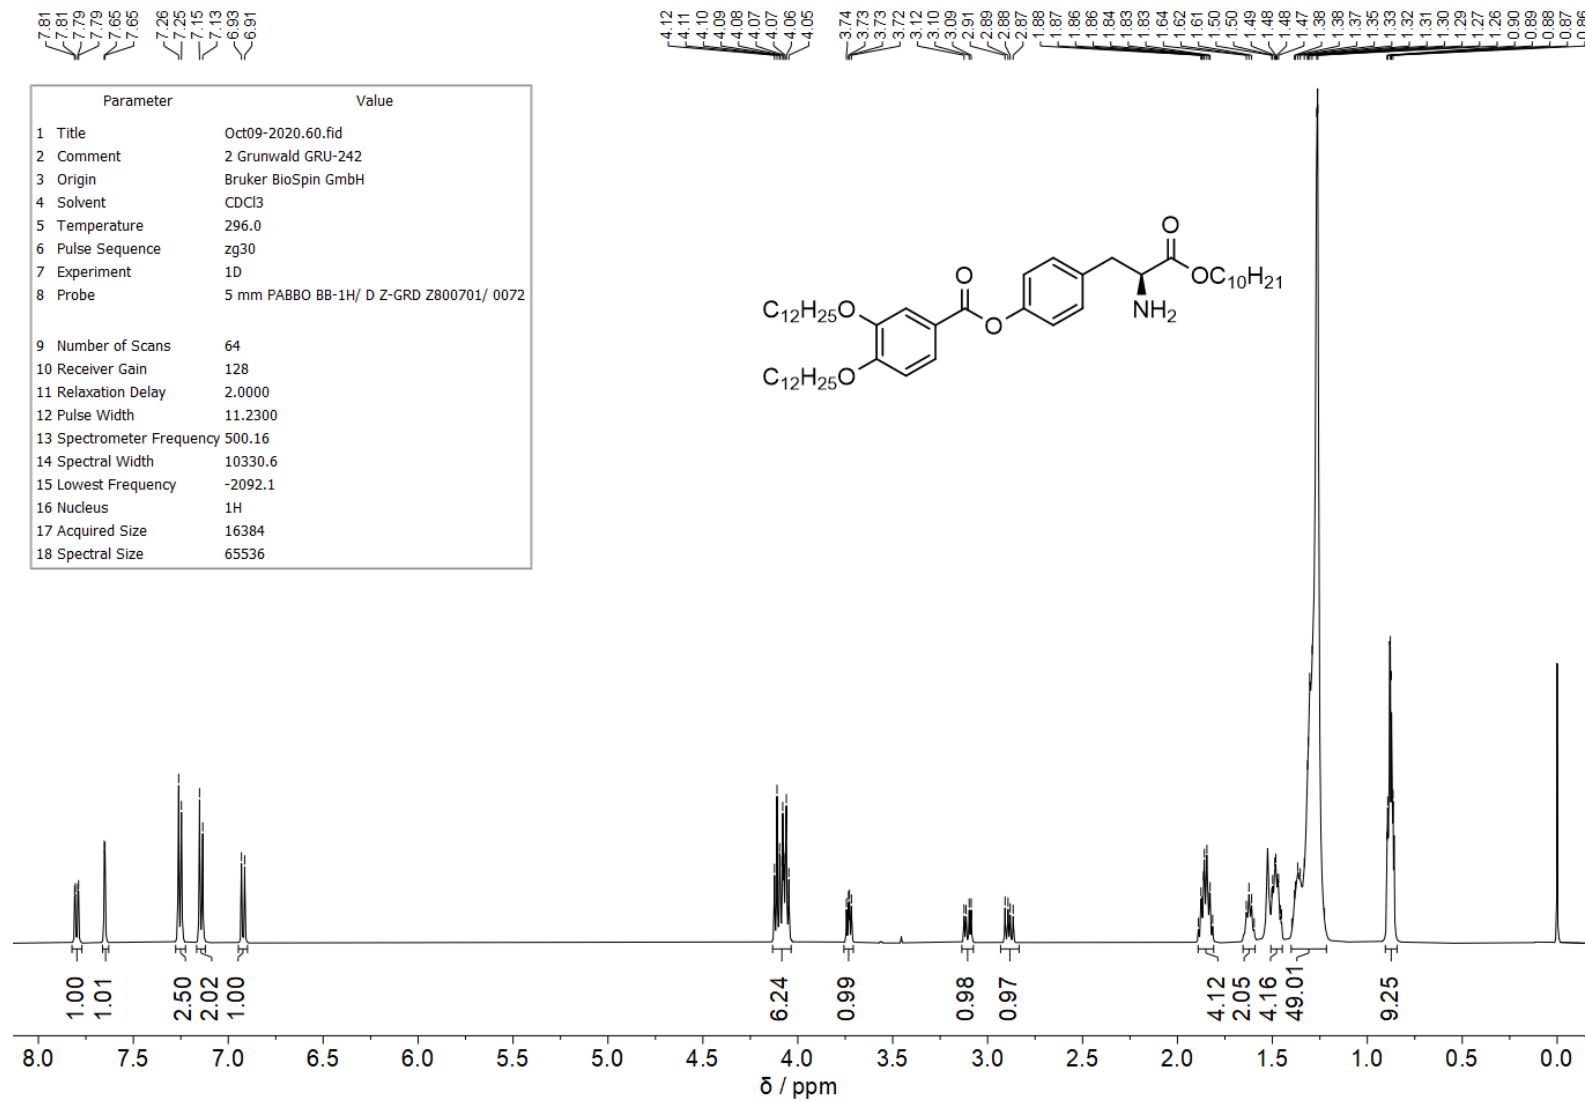

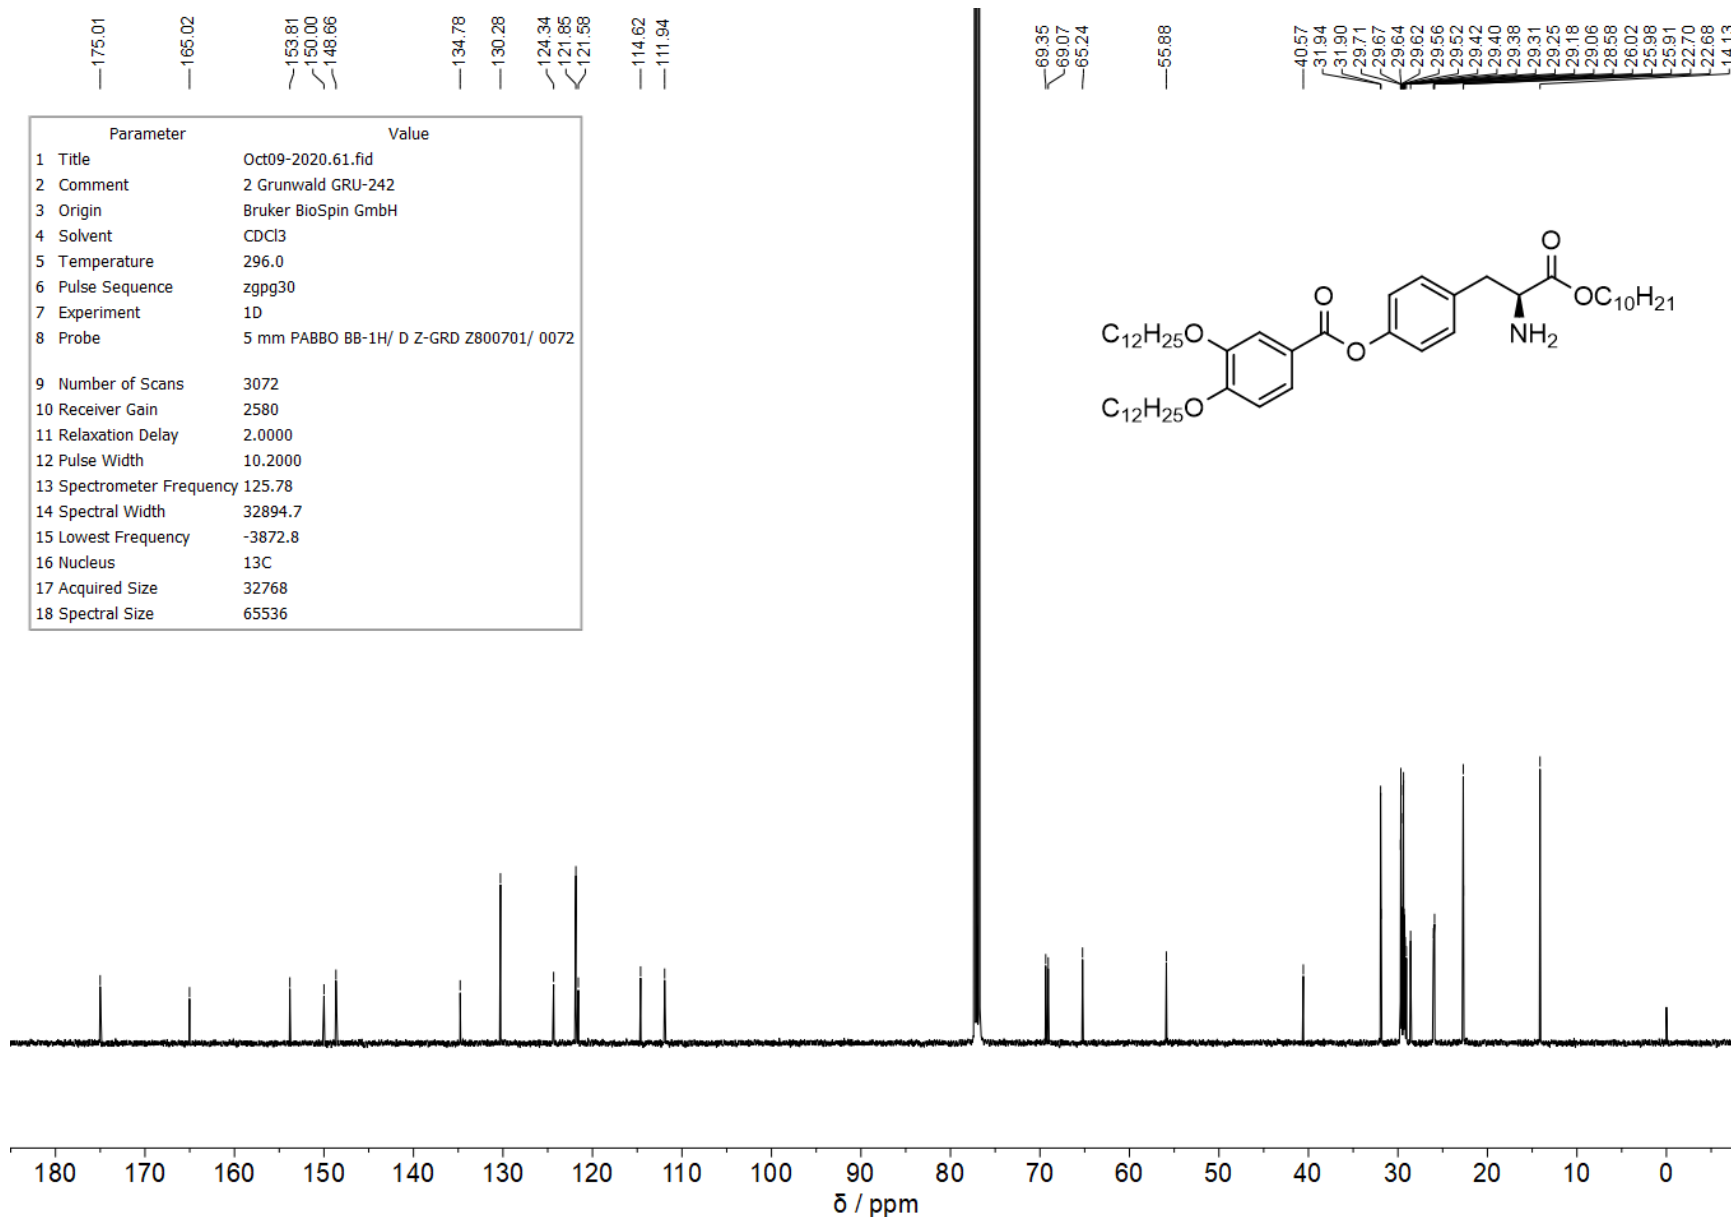

3,4-C<sub>14</sub>TyrC<sub>10</sub>NH<sub>2</sub>

7.81  
7.79  
7.79  
7.65  
7.65  
7.26  
7.25  
7.13  
6.93  
6.91

4.12  
4.11  
4.10  
4.09  
4.06  
4.07  
4.06  
4.05  
3.74  
3.73  
3.73  
3.72  
3.12  
3.11  
3.10  
3.08  
2.91  
2.89  
2.88  
2.87  
1.89  
1.88  
1.87  
1.86  
1.84  
1.83  
1.83  
1.81  
1.64  
1.62  
1.61  
1.50  
1.49  
1.48  
1.47  
1.46  
1.45  
1.39  
1.38  
1.36  
1.37  
1.34  
1.30  
1.28  
1.26  
1.089  
1.088  
1.087  
1.086

| Parameter                 | Value                                   |
|---------------------------|-----------------------------------------|
| 1 Title                   | Oct09-2020.70.fid                       |
| 2 Comment                 | 2 Grunwald GRU-243                      |
| 3 Origin                  | Bruker BioSpin GmbH                     |
| 4 Solvent                 | CDCl <sub>3</sub>                       |
| 5 Temperature             | 296.0                                   |
| 6 Pulse Sequence          | zg30                                    |
| 7 Experiment              | 1D                                      |
| 8 Probe                   | 5 mm PABBO BB-1H/ D Z-GRD Z800701/ 0072 |
| 9 Number of Scans         | 64                                      |
| 10 Receiver Gain          | 45                                      |
| 11 Relaxation Delay       | 2.0000                                  |
| 12 Pulse Width            | 11.2300                                 |
| 13 Spectrometer Frequency | 500.16                                  |
| 14 Spectral Width         | 10330.6                                 |
| 15 Lowest Frequency       | -2091.8                                 |
| 16 Nucleus                | <sup>1</sup> H                          |
| 17 Acquired Size          | 16384                                   |
| 18 Spectral Size          | 65536                                   |

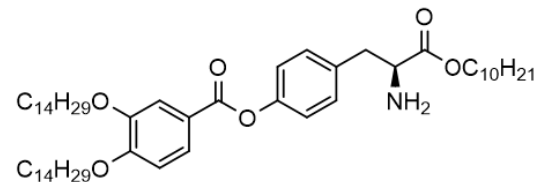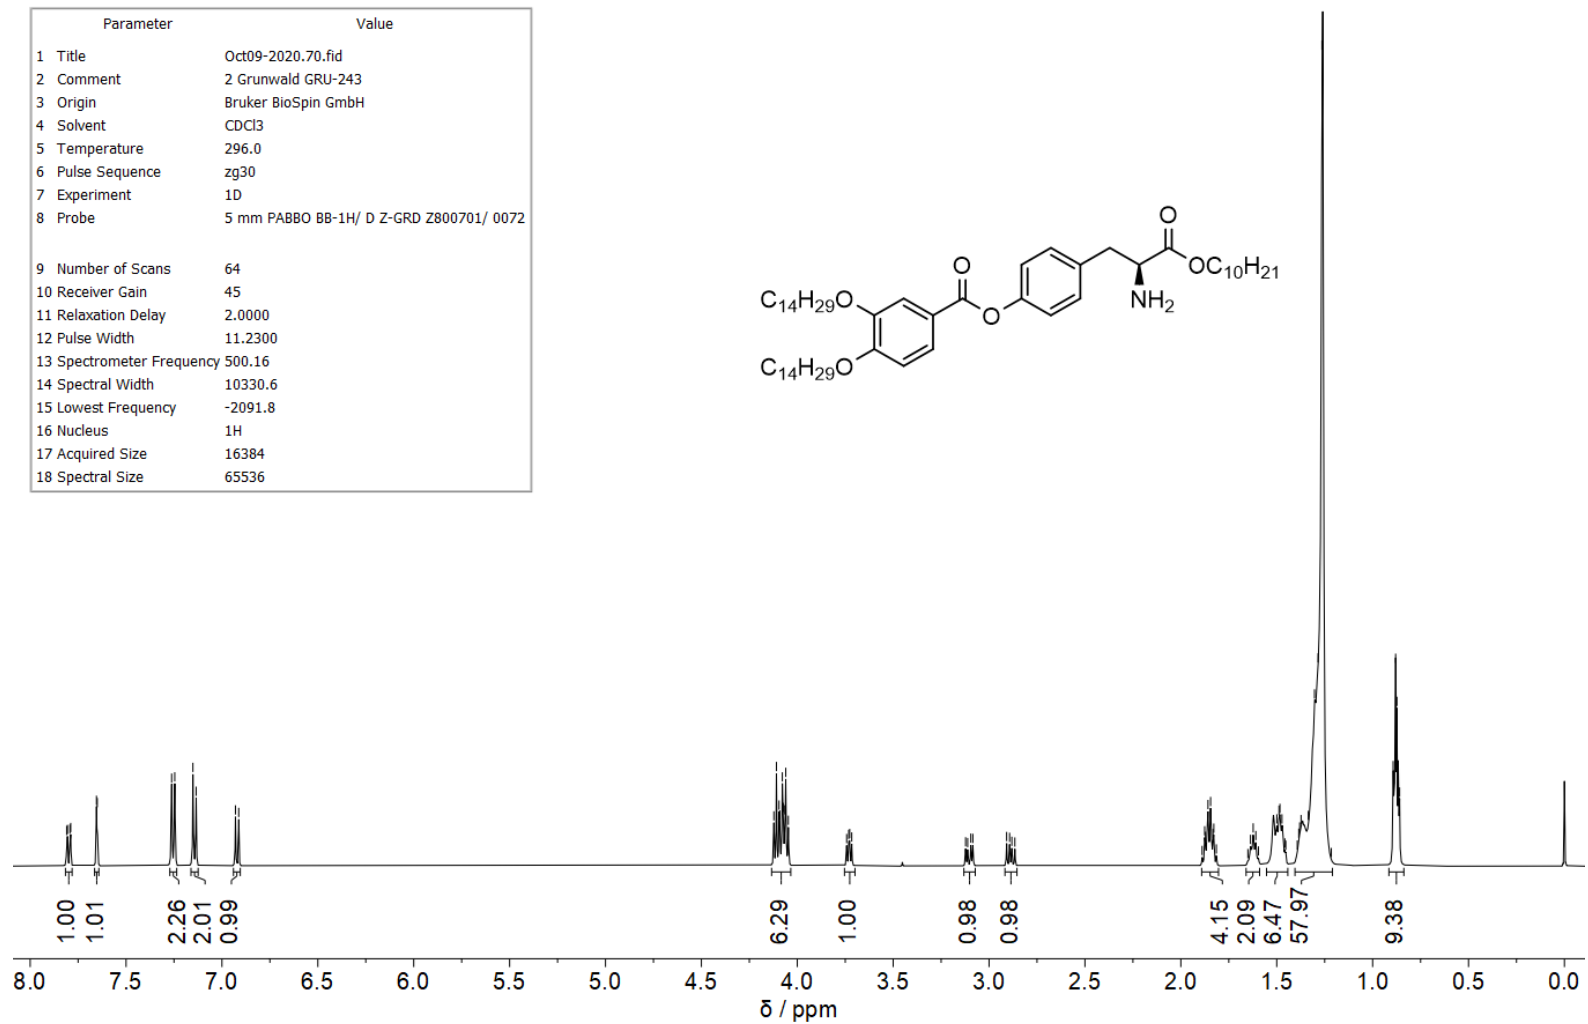

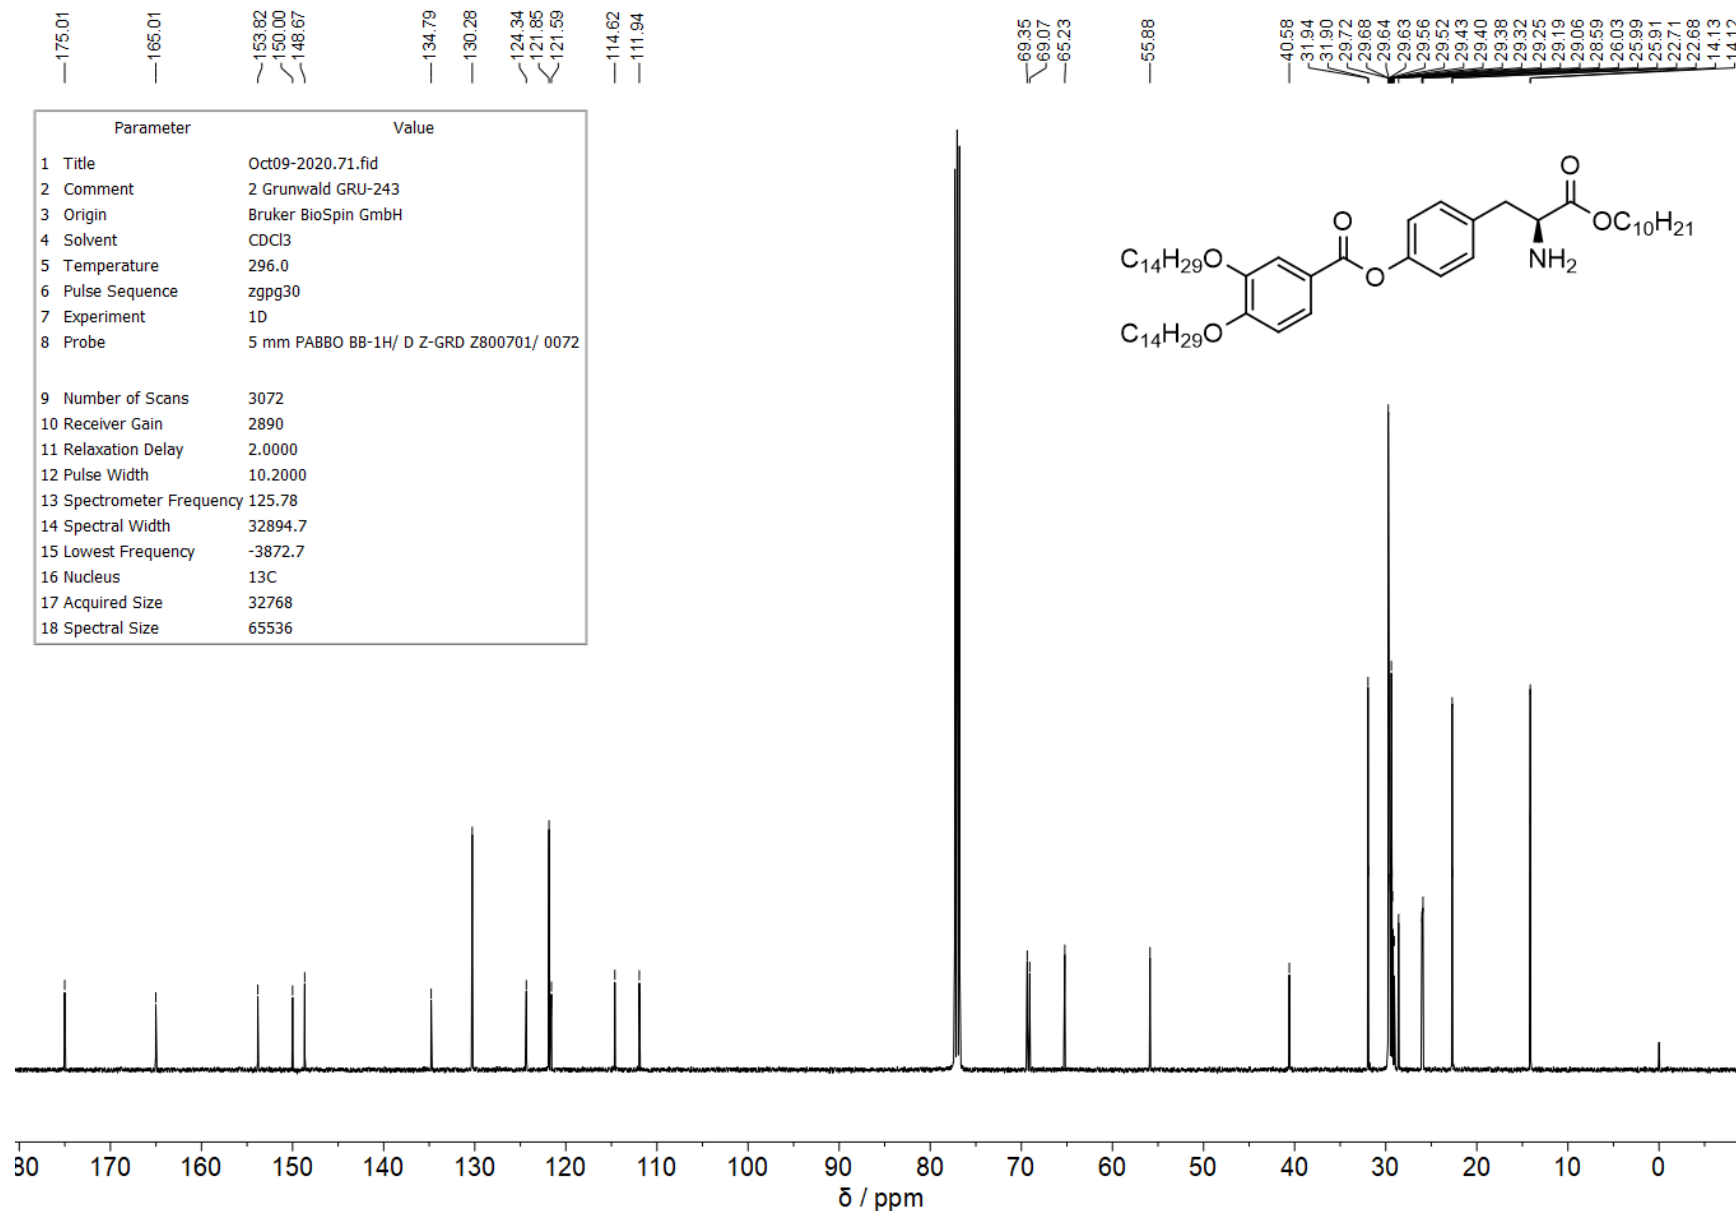

3,4-C<sub>10</sub>TyrC<sub>12</sub>NH<sub>2</sub>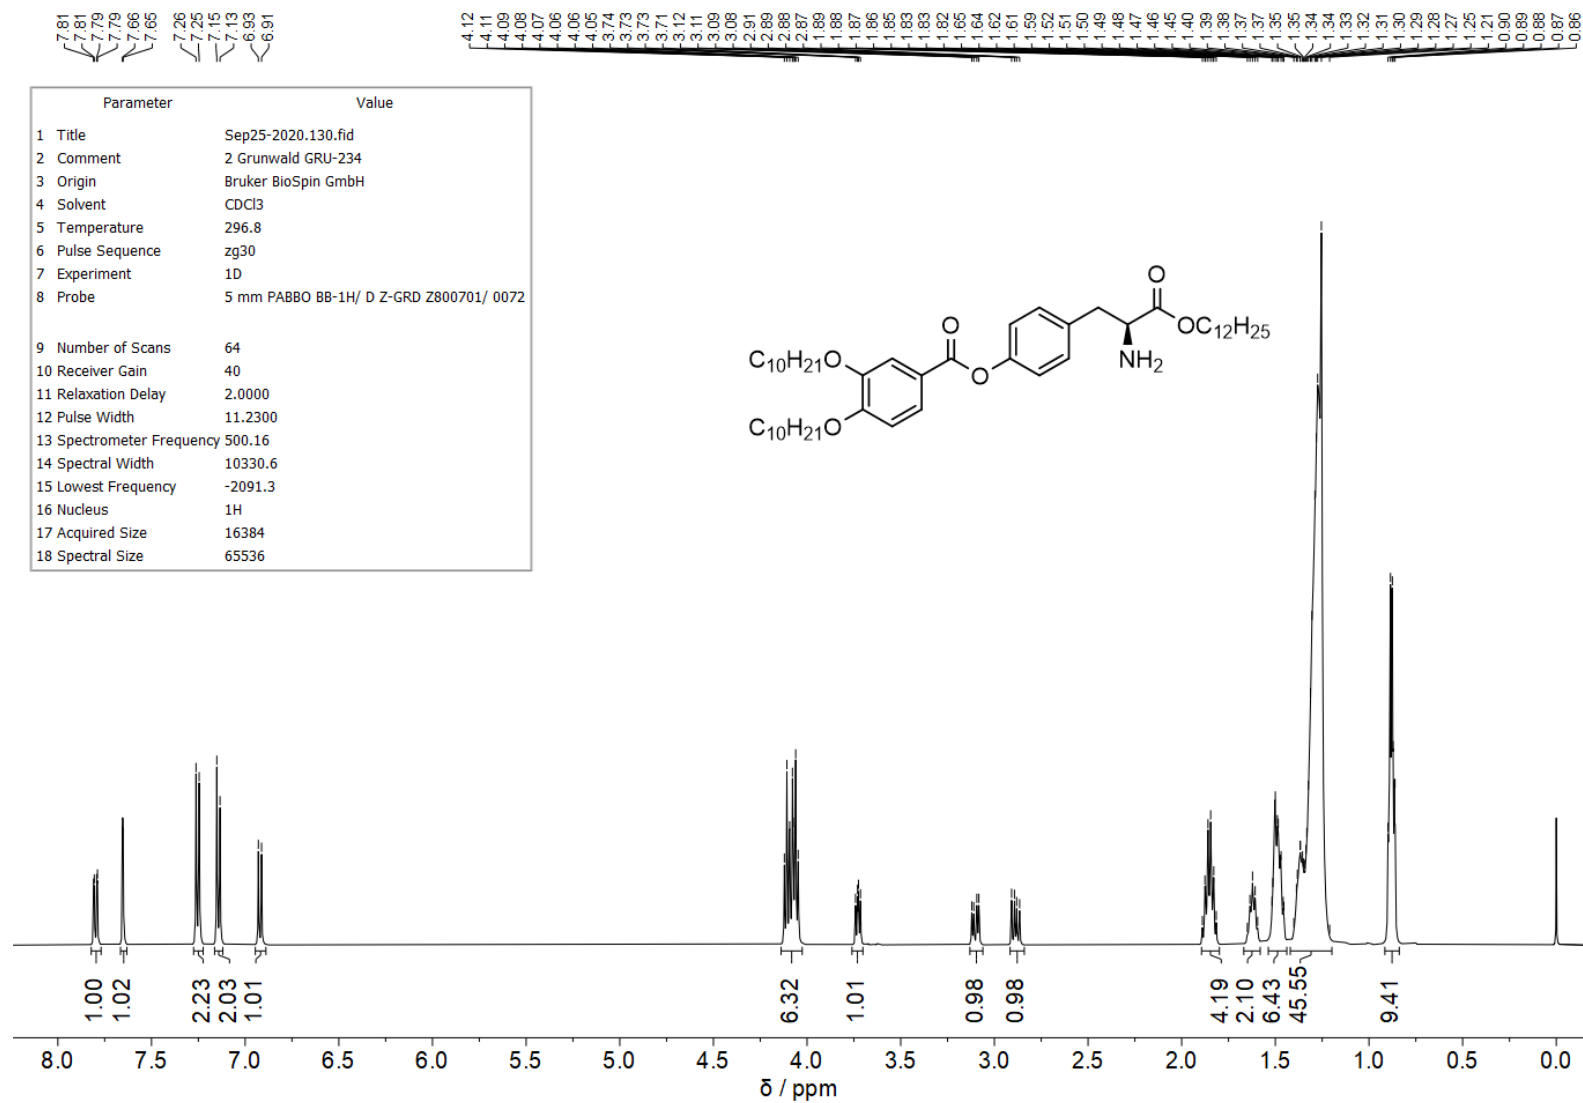

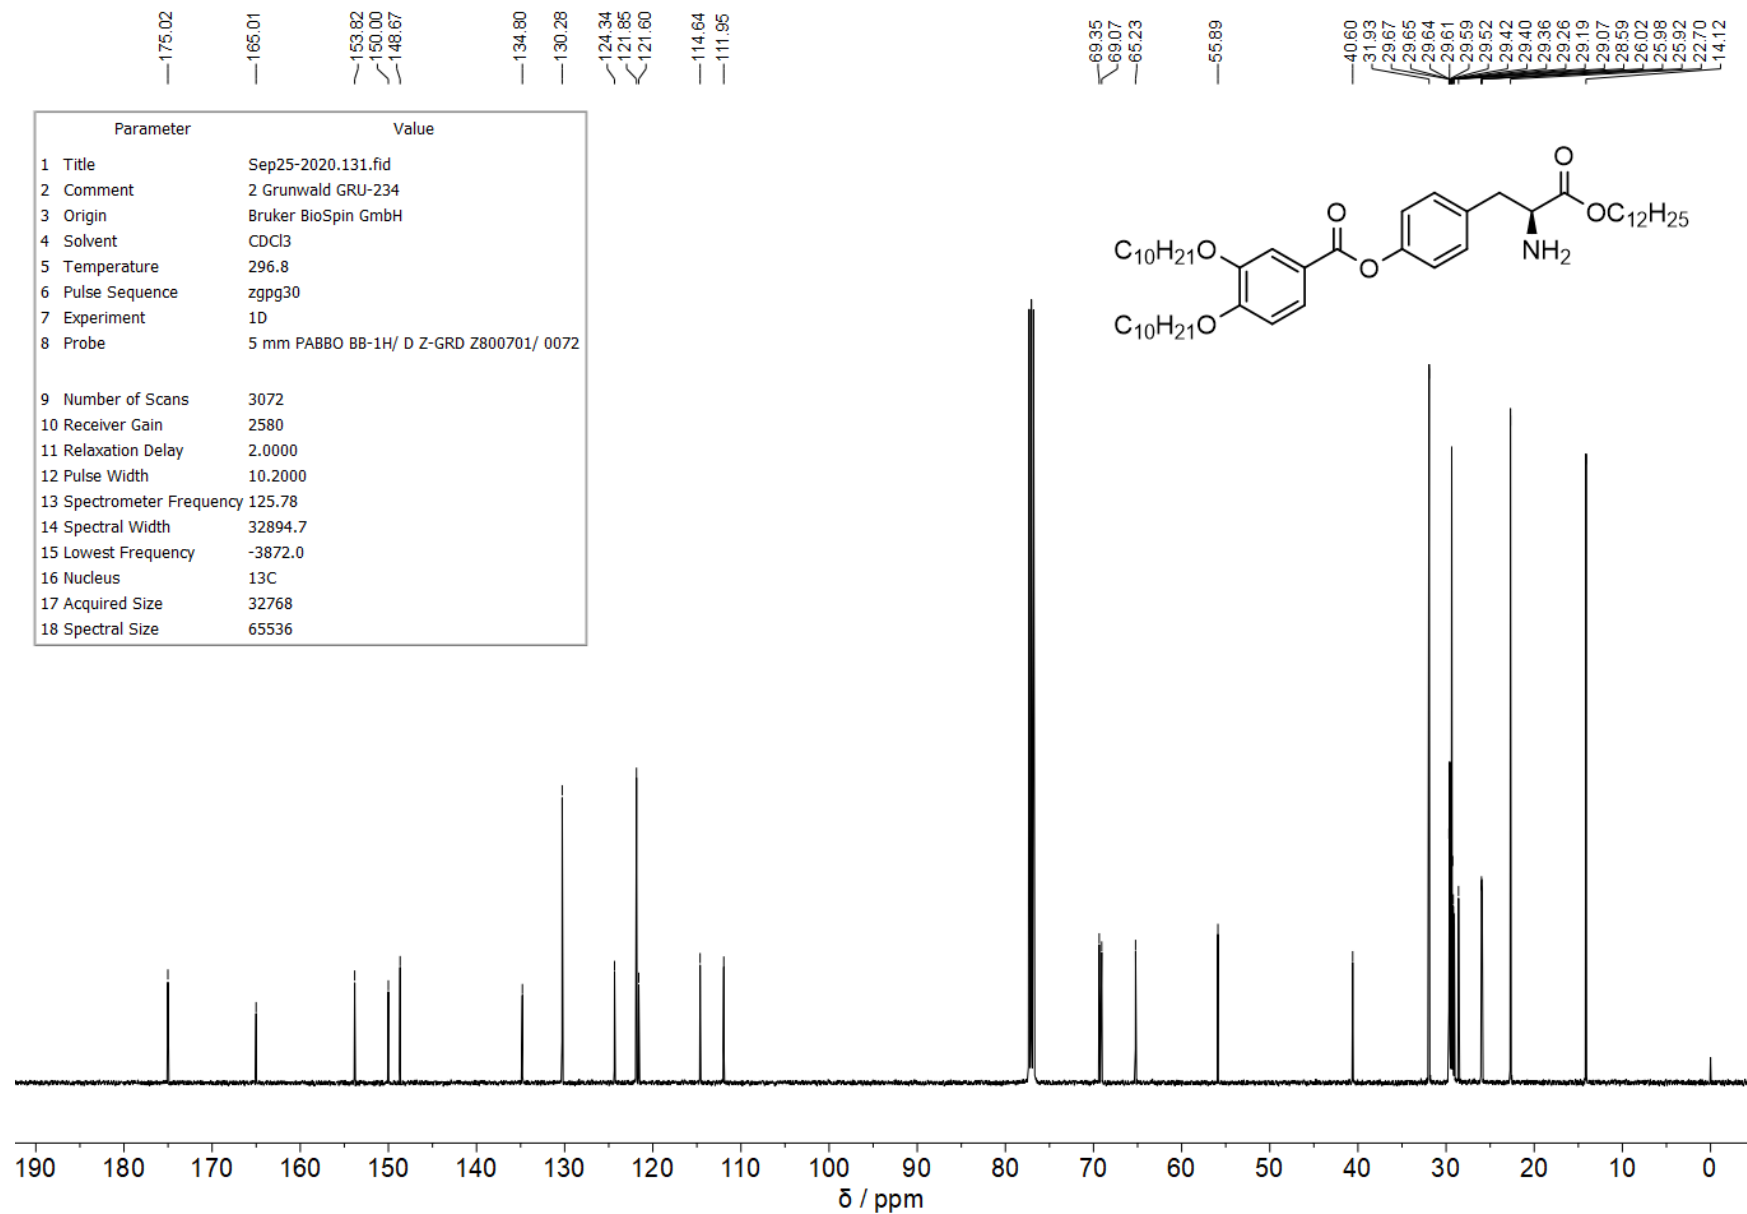

3,4-C<sub>12</sub>TyrC<sub>12</sub>NH<sub>2</sub>

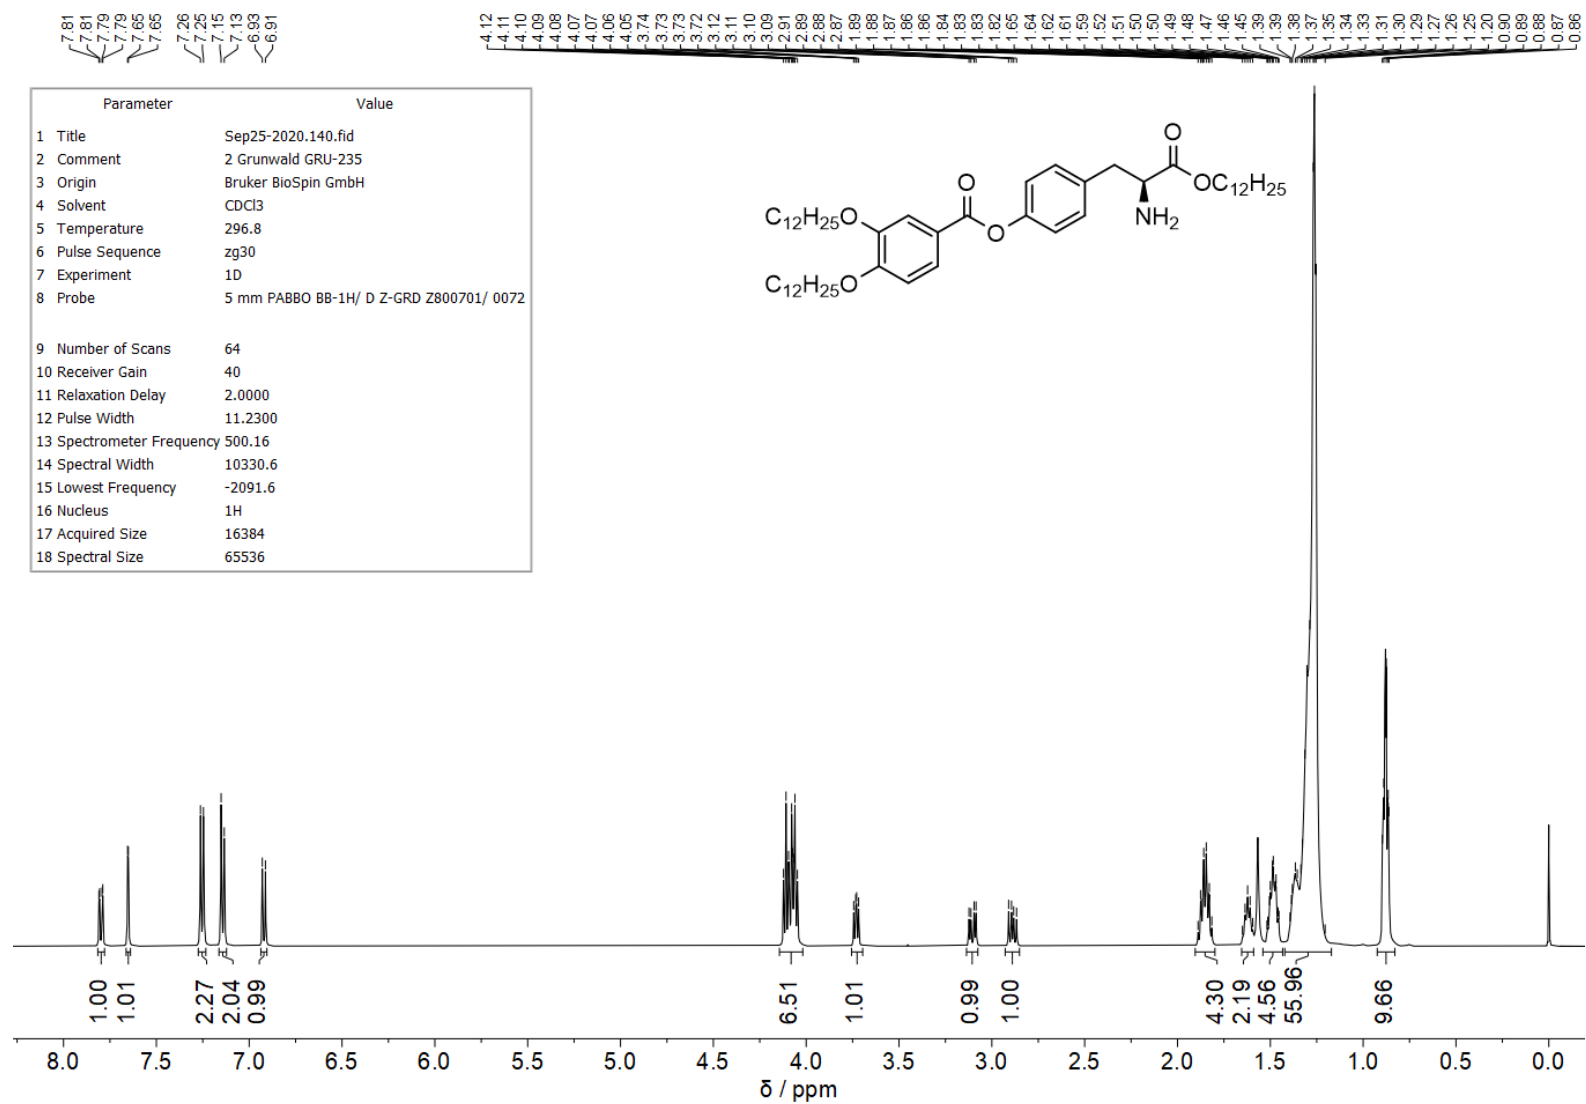



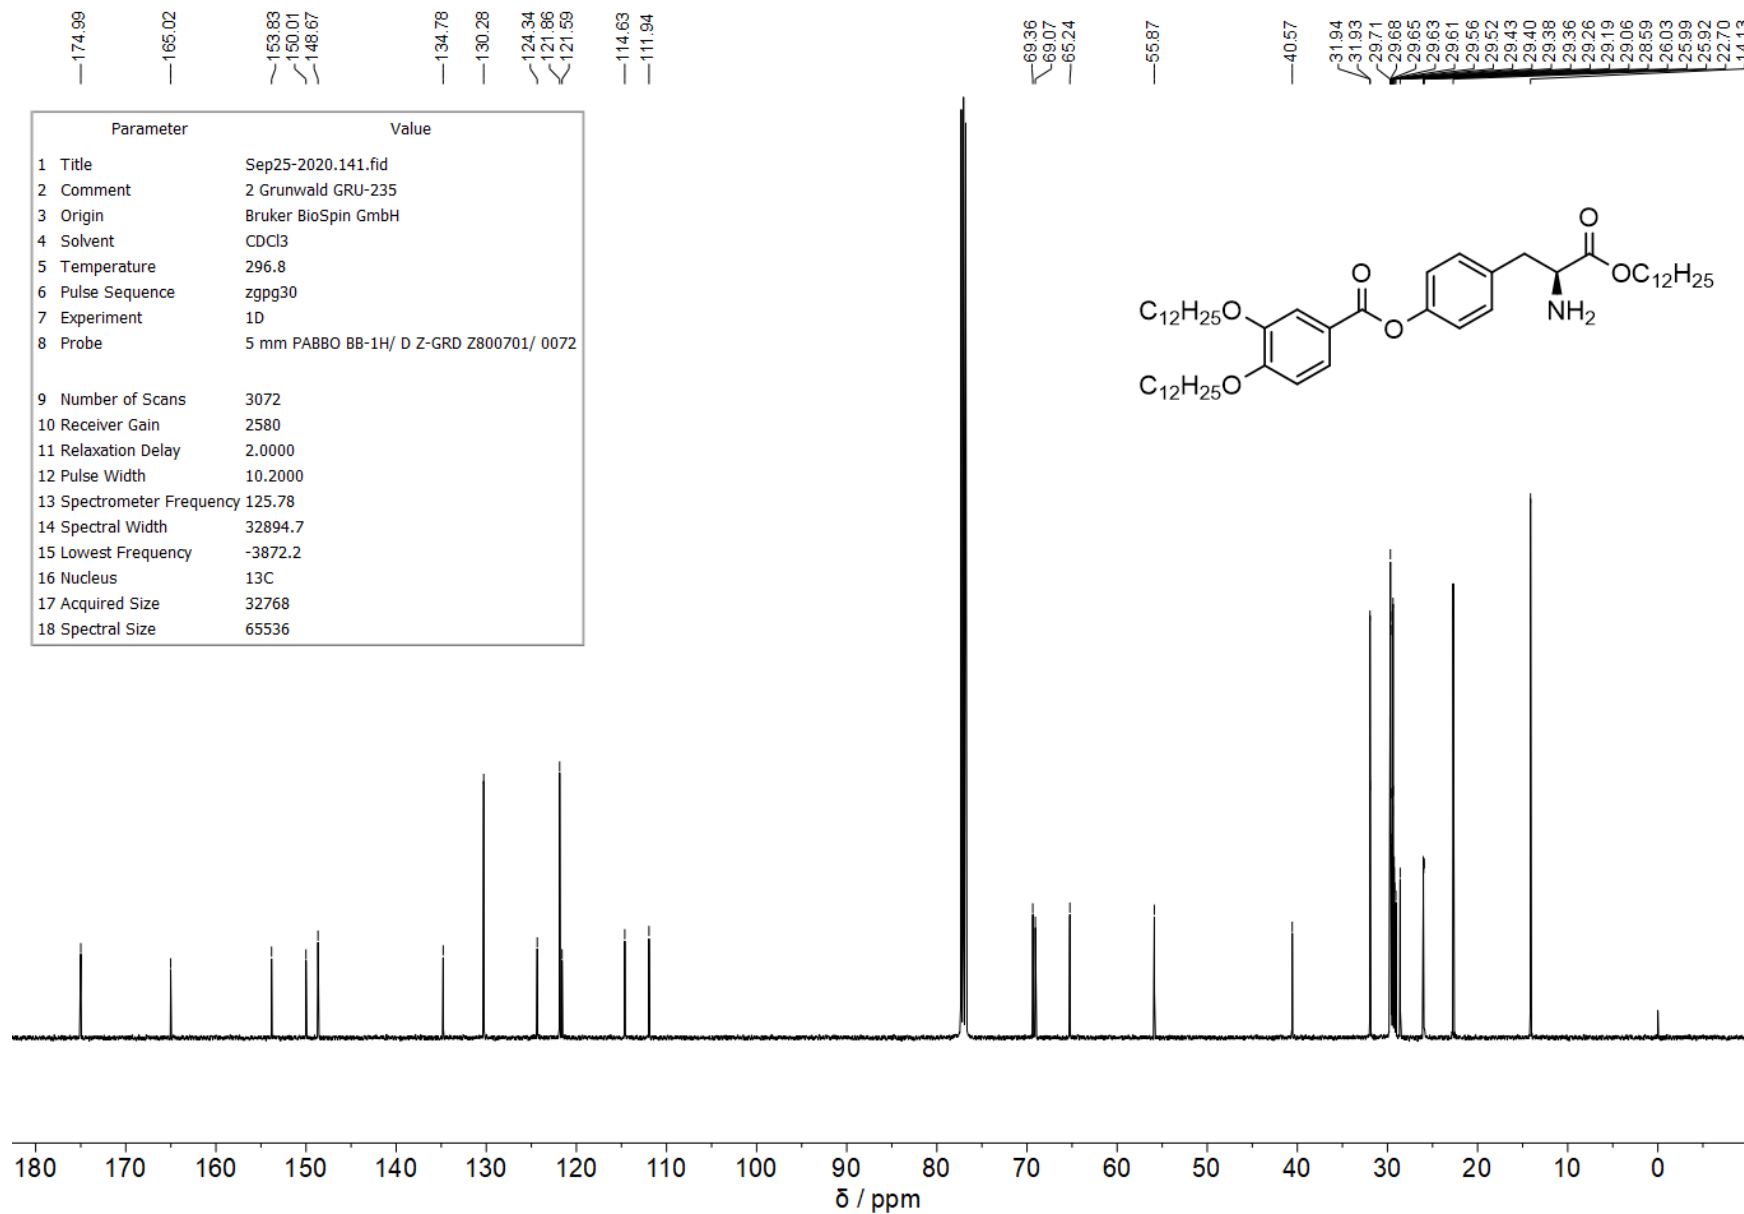

3,4-C<sub>14</sub>TyrC<sub>12</sub>NH<sub>2</sub>

7.81  
7.81  
7.79  
7.79  
7.65  
7.65  
7.26  
7.25  
7.15  
7.13  
6.93  
6.91

4.12  
4.11  
4.10  
4.09  
4.08  
4.07  
4.07  
4.06  
4.05  
3.74  
3.73  
3.72  
3.12  
3.11  
3.10  
3.09  
2.91  
2.89  
2.88  
2.87  
1.86  
1.87  
1.86  
1.86  
1.84  
1.84  
1.83  
1.83  
1.64  
1.62  
1.61  
1.50  
1.49  
1.48  
1.47  
1.46  
1.46  
1.39  
1.39  
1.37  
1.36  
1.35  
1.33  
1.31  
1.30  
1.29  
1.29  
1.26  
1.25  
1.23  
1.23  
1.089  
1.088  
1.087  
1.086

| Parameter                 | Value                                   |
|---------------------------|-----------------------------------------|
| 1 Title                   | Oct01-2020.30.fid                       |
| 2 Comment                 | 2 Grunwald GRU238                       |
| 3 Origin                  | Bruker BioSpin GmbH                     |
| 4 Solvent                 | CDCl <sub>3</sub>                       |
| 5 Temperature             | 296.0                                   |
| 6 Pulse Sequence          | zg30                                    |
| 7 Experiment              | 1D                                      |
| 8 Probe                   | 5 mm PABBO BB-1H/ D Z-GRD Z800701/ 0072 |
| 9 Number of Scans         | 32                                      |
| 10 Receiver Gain          | 101                                     |
| 11 Relaxation Delay       | 2.0000                                  |
| 12 Pulse Width            | 11.2300                                 |
| 13 Spectrometer Frequency | 500.16                                  |
| 14 Spectral Width         | 10330.6                                 |
| 15 Lowest Frequency       | -2092.2                                 |
| 16 Nucleus                | 1H                                      |
| 17 Acquired Size          | 16384                                   |
| 18 Spectral Size          | 65536                                   |

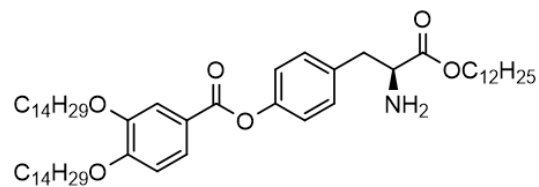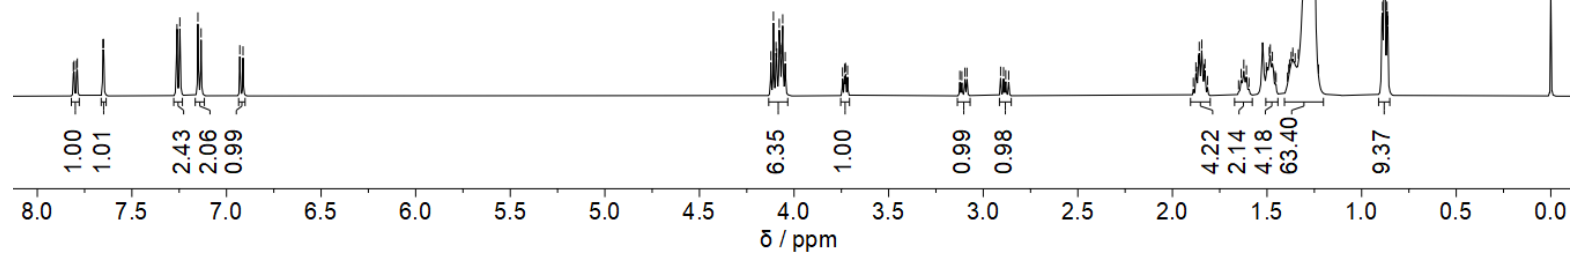

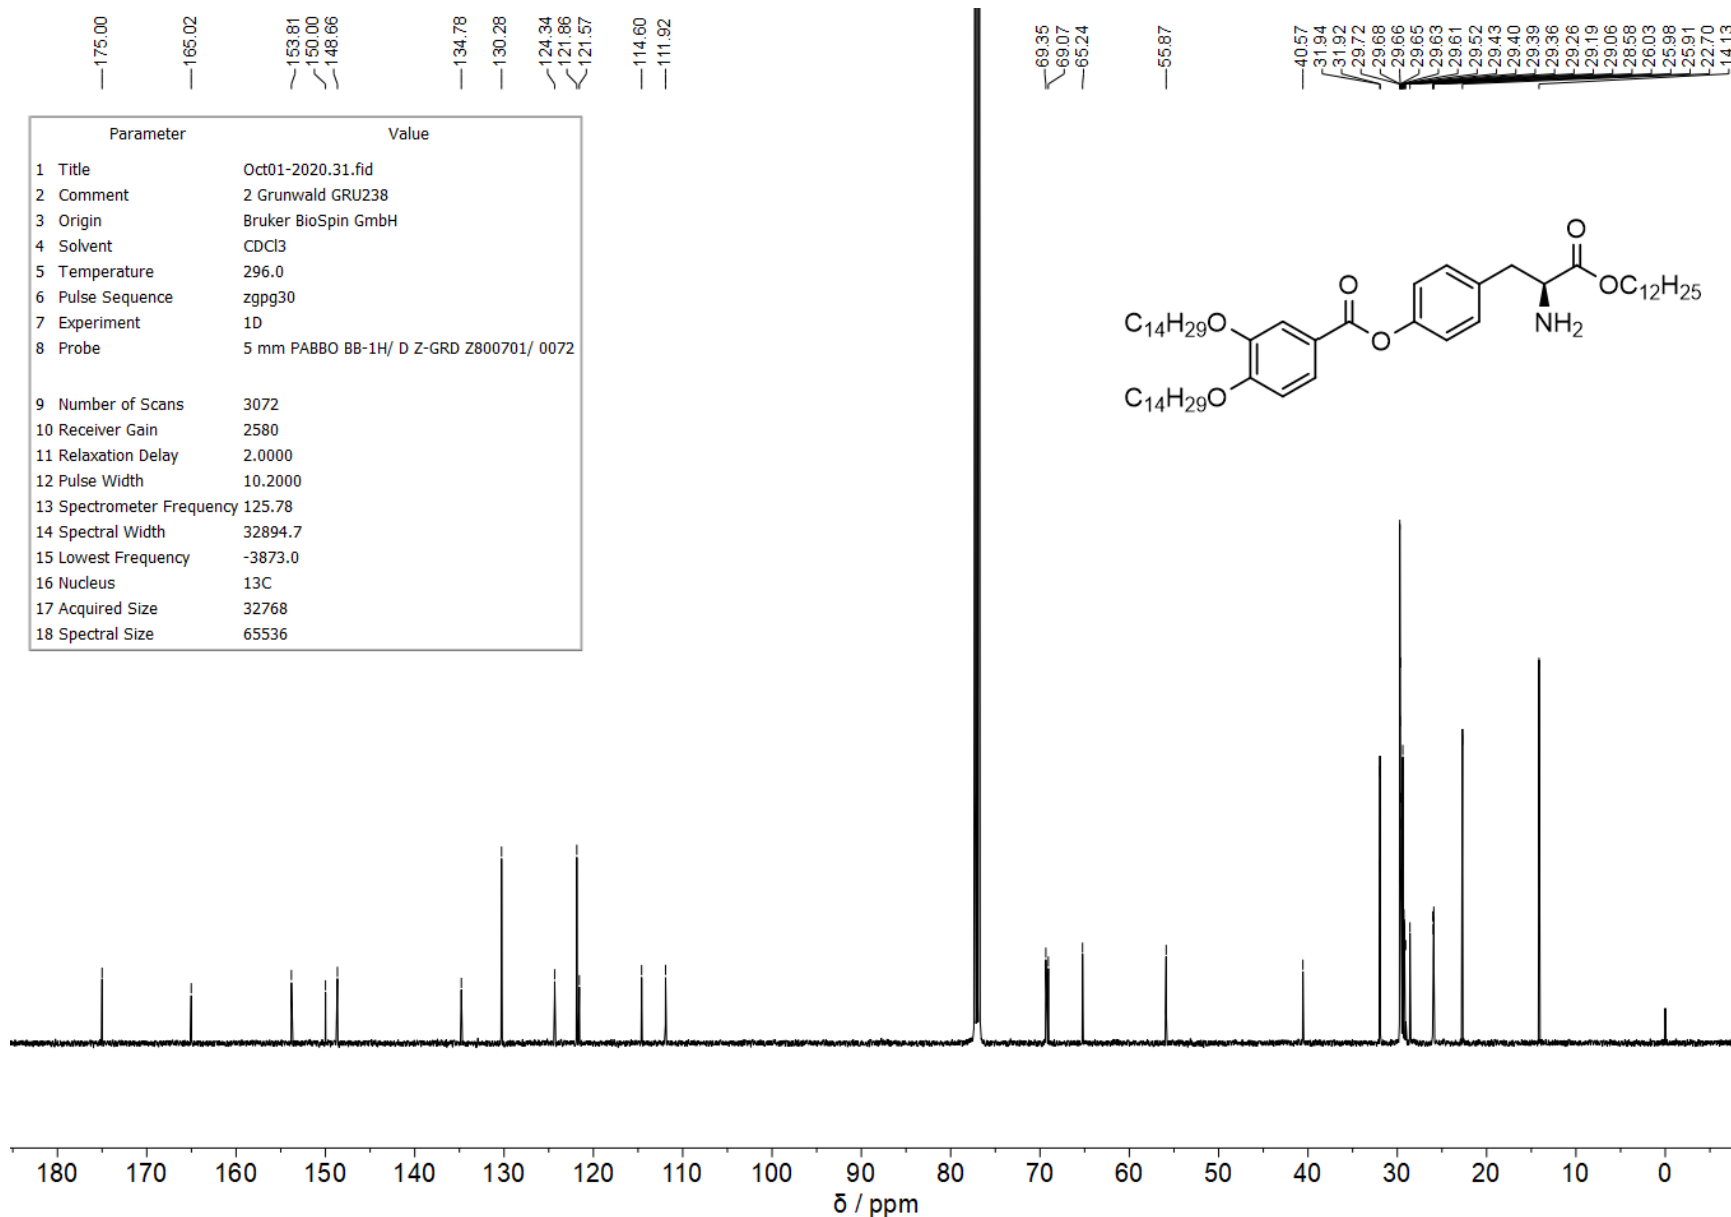

3,4-C<sub>10</sub>TyrC<sub>14</sub>NH<sub>2</sub>

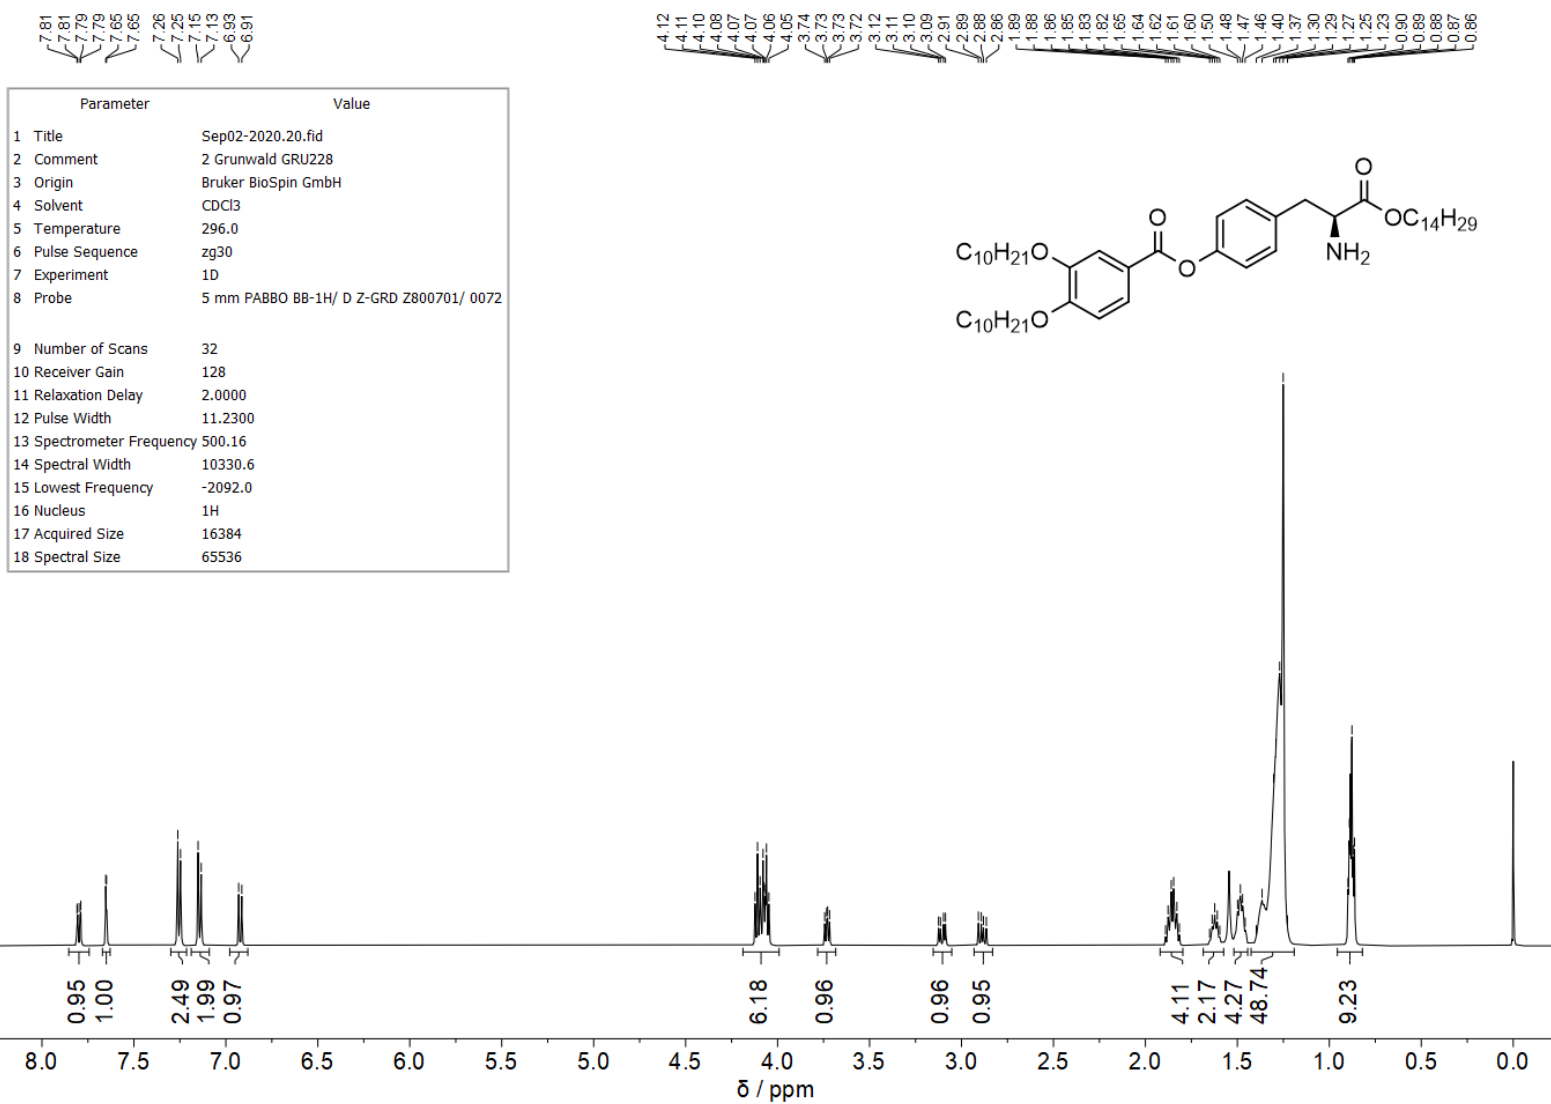

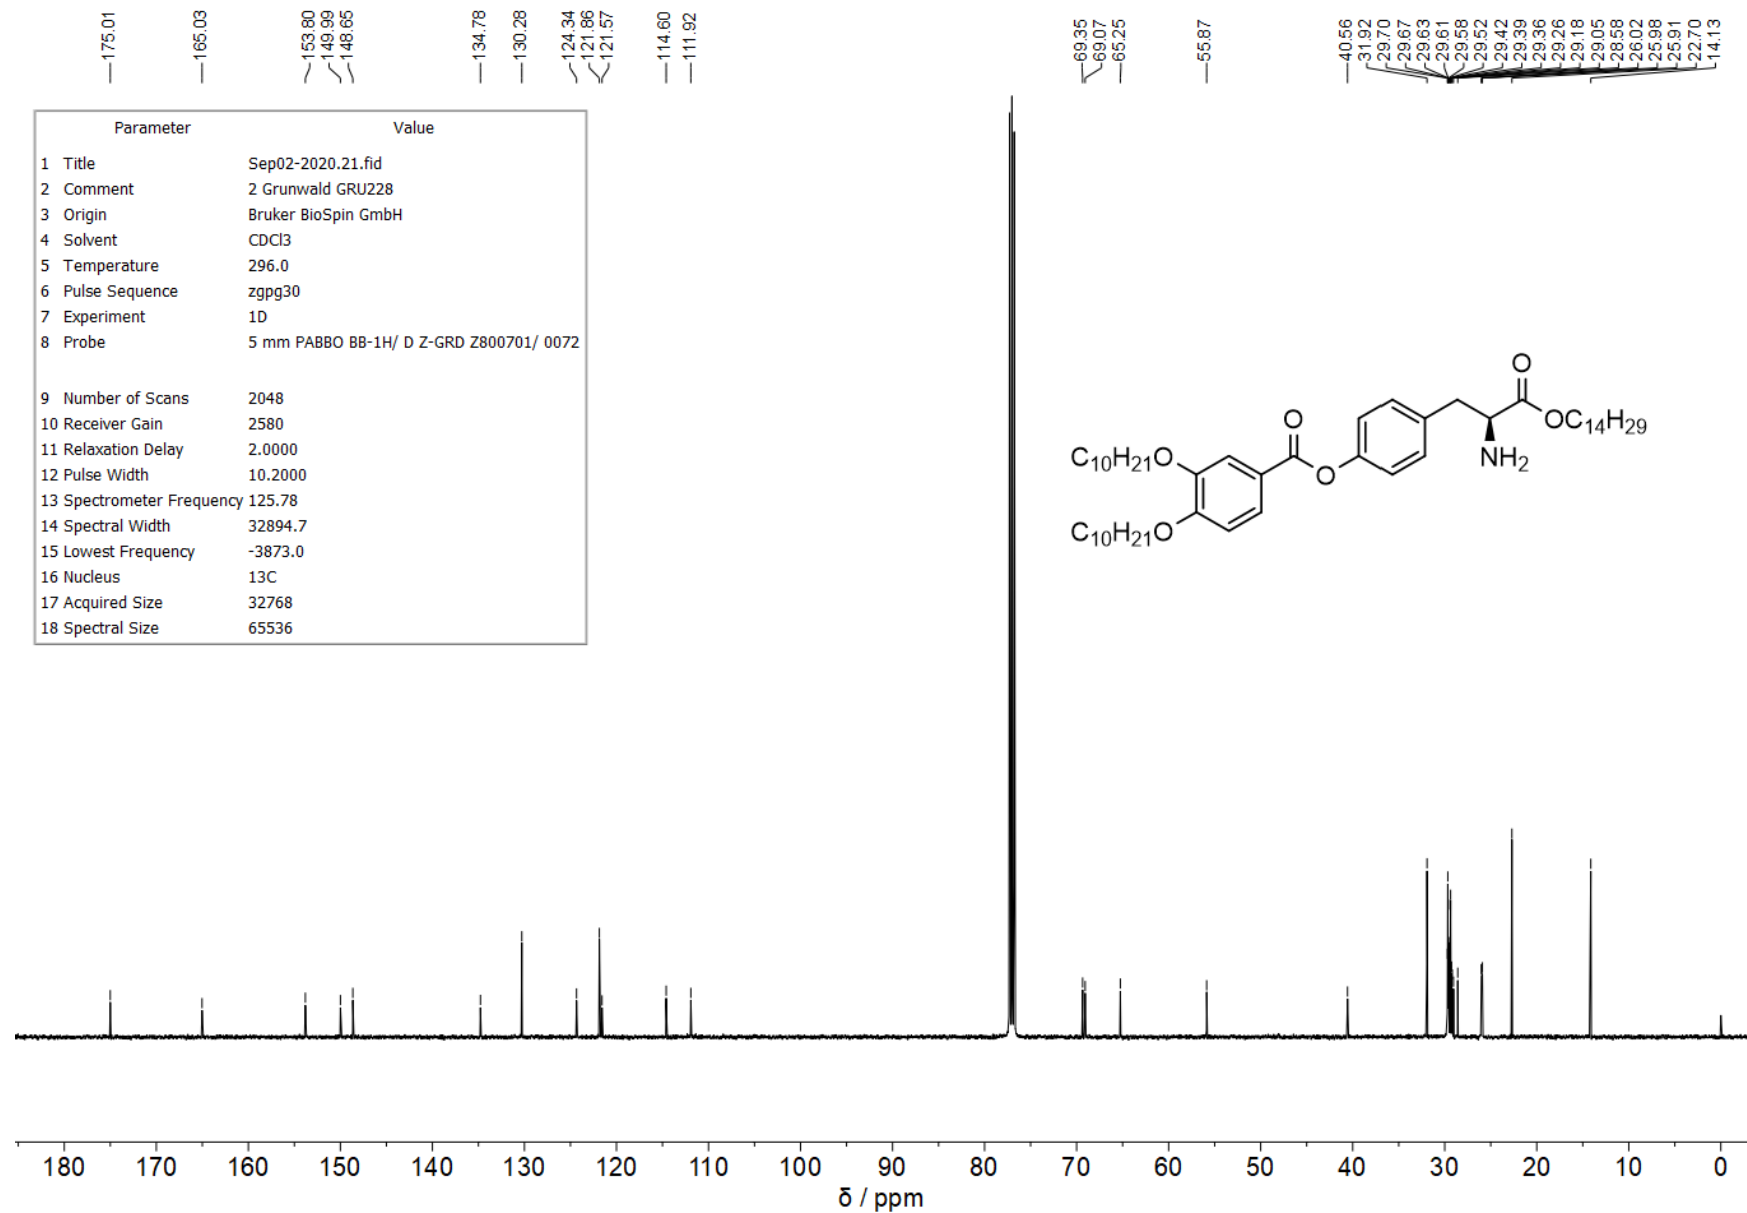

3,4-C<sub>12</sub>TyrC<sub>14</sub>NH<sub>2</sub>

7.81  
7.81  
7.79  
7.79  
7.65  
7.65  
7.26  
7.26  
7.15  
7.15  
6.99  
6.99

4.12  
4.11  
4.10  
4.09  
4.08  
4.07  
4.07  
4.06  
4.05  
3.74  
3.73  
3.73  
3.72  
3.12  
3.10  
3.09  
2.91  
2.89  
2.88  
2.86  
1.88  
1.87  
1.86  
1.86  
1.85  
1.85  
1.83  
1.83  
1.64  
1.62  
1.61  
1.50  
1.49  
1.48  
1.48  
1.47  
1.46  
1.46  
1.38  
1.37  
1.36  
1.35  
1.35  
1.32  
1.31  
1.30  
1.29  
1.26  
1.25  
1.25  
1.00  
0.99  
0.88  
0.87  
0.86

| Parameter                 | Value                                   |
|---------------------------|-----------------------------------------|
| 1 Title                   | Sep02-2020.30.fid                       |
| 2 Comment                 | 2 Grunwald GRU229                       |
| 3 Origin                  | Bruker BioSpin GmbH                     |
| 4 Solvent                 | CDCl <sub>3</sub>                       |
| 5 Temperature             | 296.0                                   |
| 6 Pulse Sequence          | zg30                                    |
| 7 Experiment              | 1D                                      |
| 8 Probe                   | 5 mm PABBO BB-1H/ D Z-GRD Z800701/ 0072 |
| 9 Number of Scans         | 32                                      |
| 10 Receiver Gain          | 90                                      |
| 11 Relaxation Delay       | 2.0000                                  |
| 12 Pulse Width            | 11.2300                                 |
| 13 Spectrometer Frequency | 500.16                                  |
| 14 Spectral Width         | 10330.6                                 |
| 15 Lowest Frequency       | -2092.0                                 |
| 16 Nucleus                | <sup>1</sup> H                          |
| 17 Acquired Size          | 16384                                   |
| 18 Spectral Size          | 65536                                   |

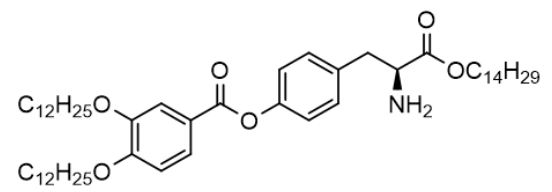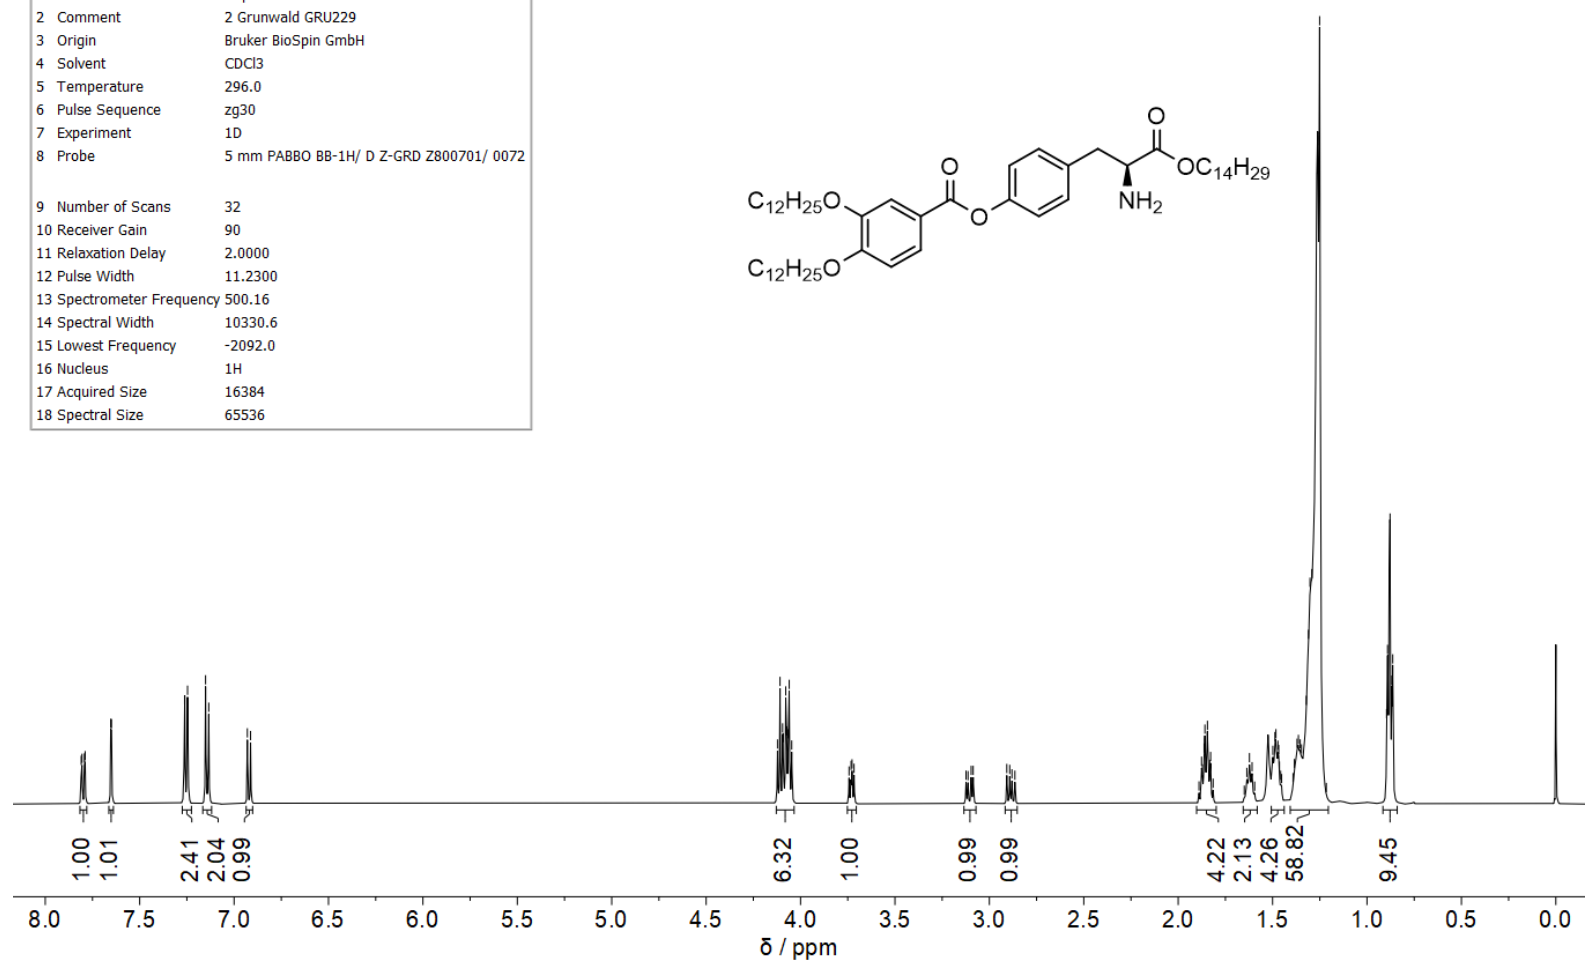

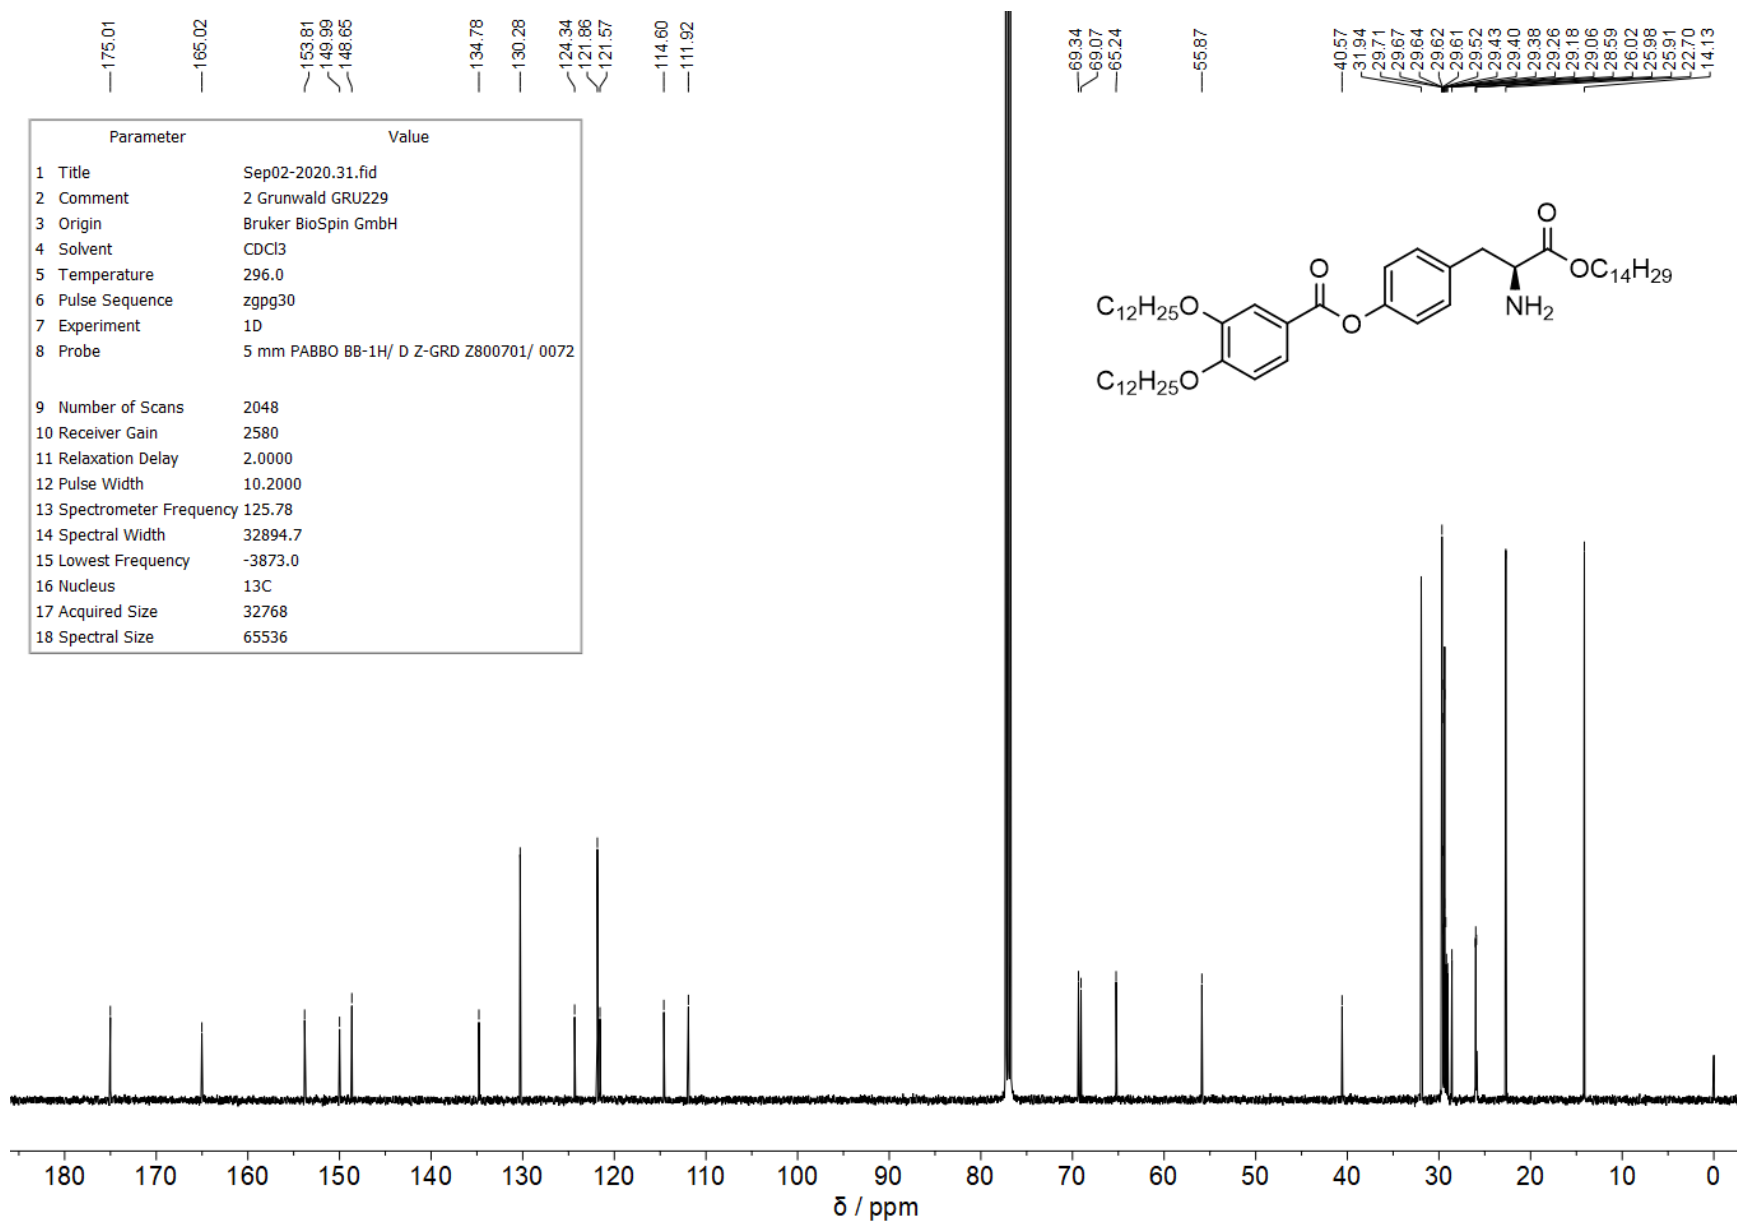

3,4-C<sub>14</sub>TyrC<sub>14</sub>NH<sub>2</sub>

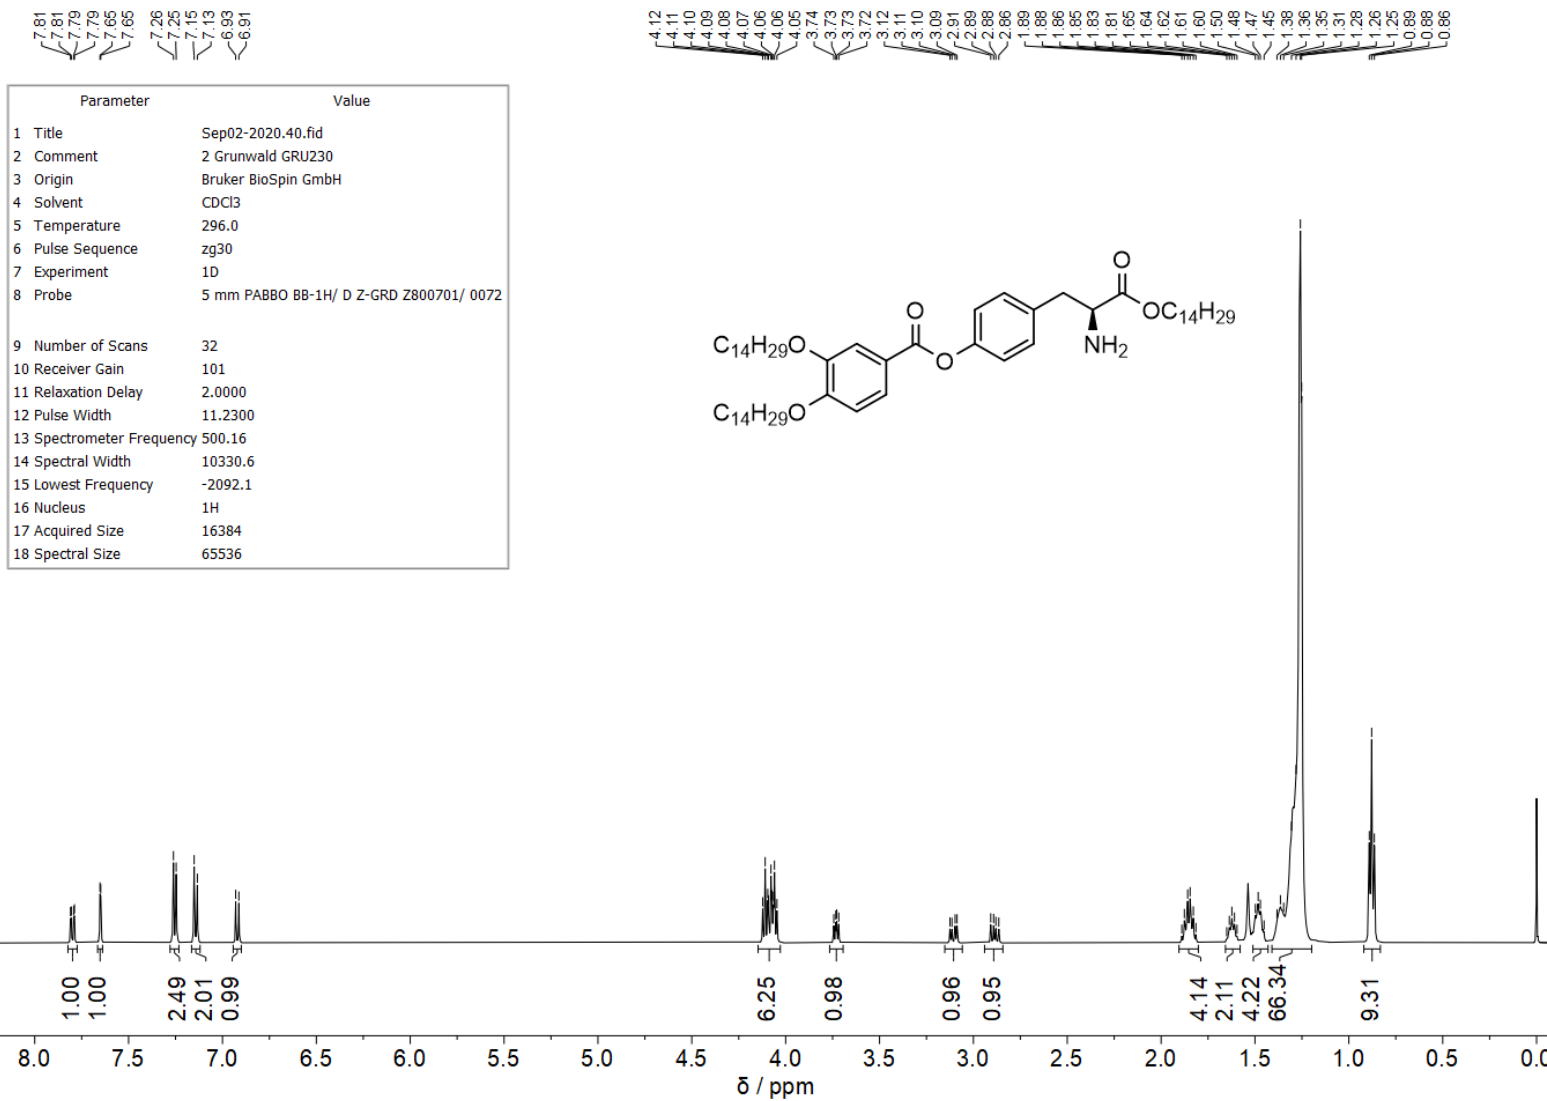

| Parameter                 | Value                                   |
|---------------------------|-----------------------------------------|
| 1 Title                   | Sep02-2020.40.fid                       |
| 2 Comment                 | 2 Grunwald GRU230                       |
| 3 Origin                  | Bruker BioSpin GmbH                     |
| 4 Solvent                 | CDCl <sub>3</sub>                       |
| 5 Temperature             | 296.0                                   |
| 6 Pulse Sequence          | zg30                                    |
| 7 Experiment              | 1D                                      |
| 8 Probe                   | 5 mm PABBO BB-1H/ D Z-GRD Z800701/ 0072 |
| 9 Number of Scans         | 32                                      |
| 10 Receiver Gain          | 101                                     |
| 11 Relaxation Delay       | 2.0000                                  |
| 12 Pulse Width            | 11.2300                                 |
| 13 Spectrometer Frequency | 500.16                                  |
| 14 Spectral Width         | 10330.6                                 |
| 15 Lowest Frequency       | -2092.1                                 |
| 16 Nucleus                | <sup>1</sup> H                          |
| 17 Acquired Size          | 16384                                   |
| 18 Spectral Size          | 65536                                   |



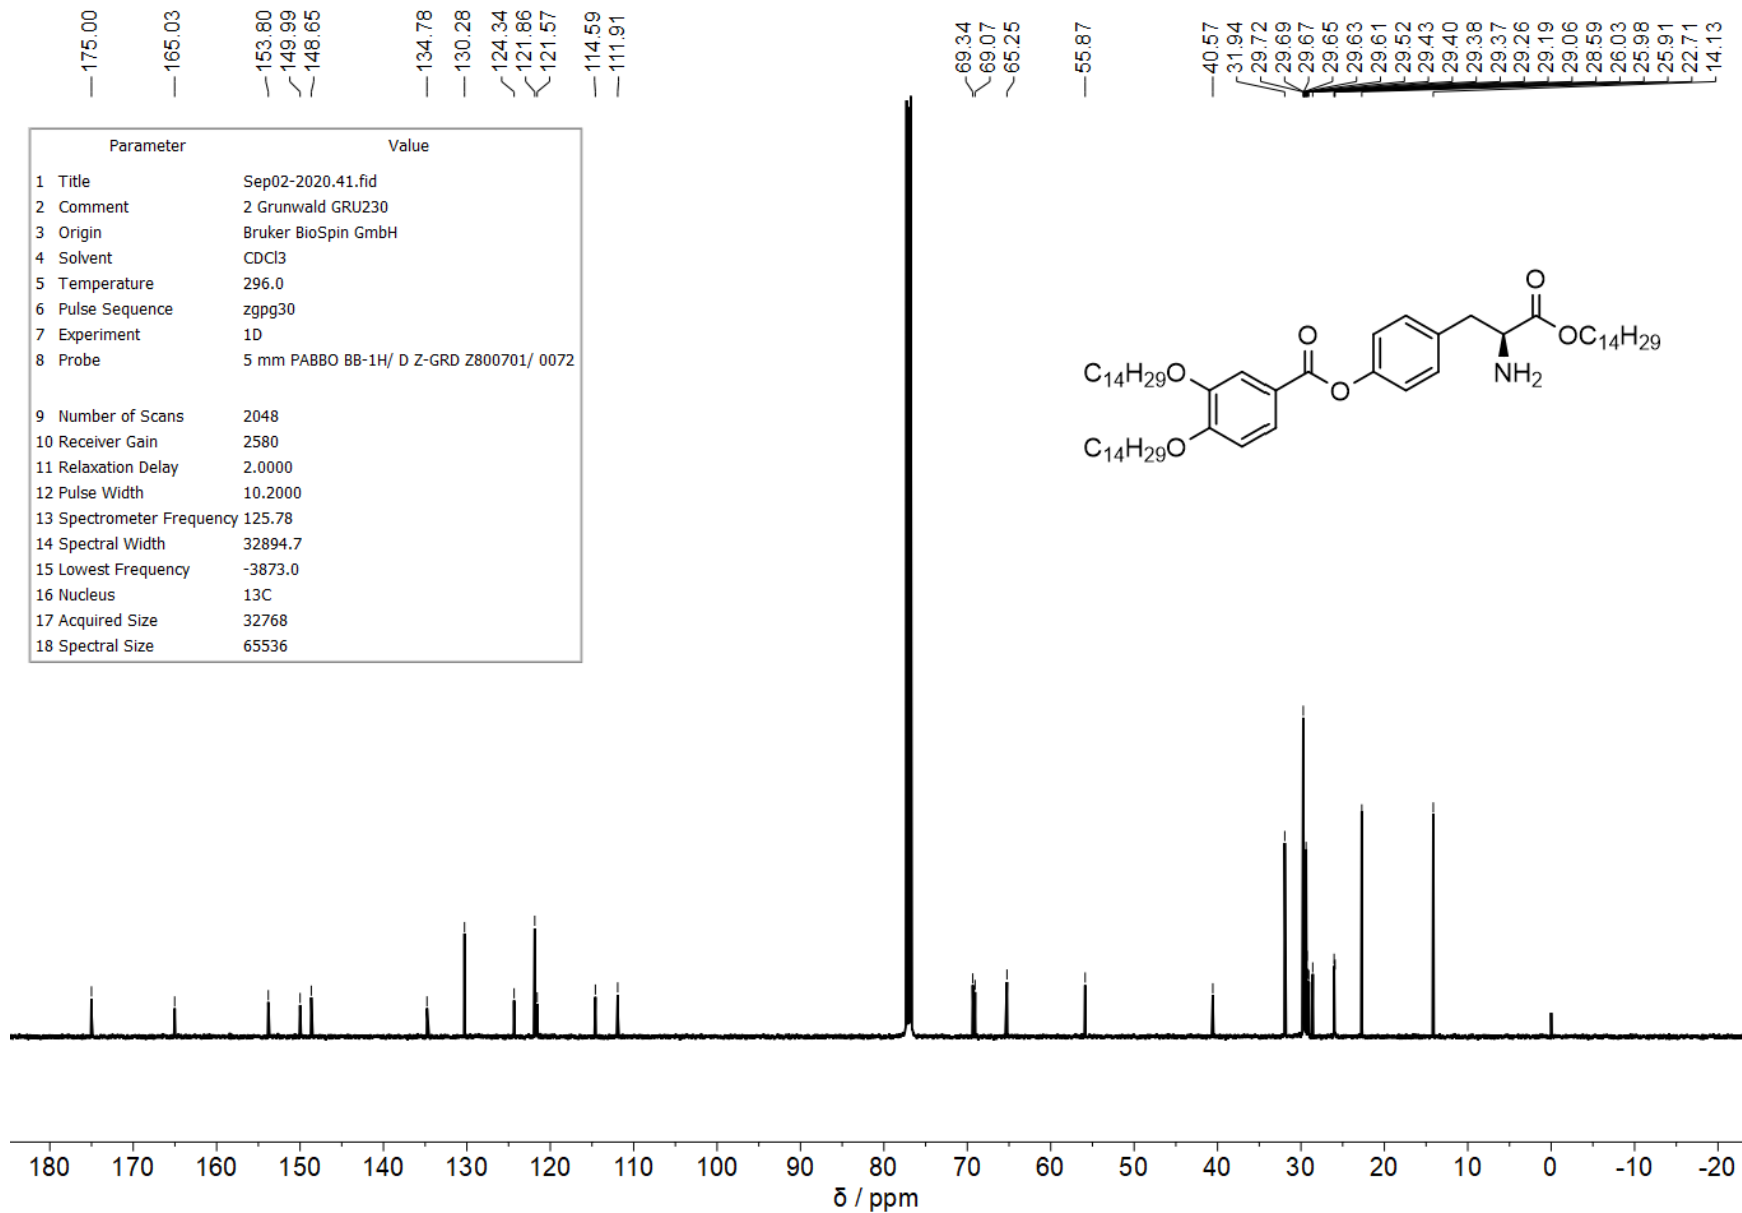

3,5-C<sub>10</sub>TyrC<sub>10</sub>NH<sub>2</sub>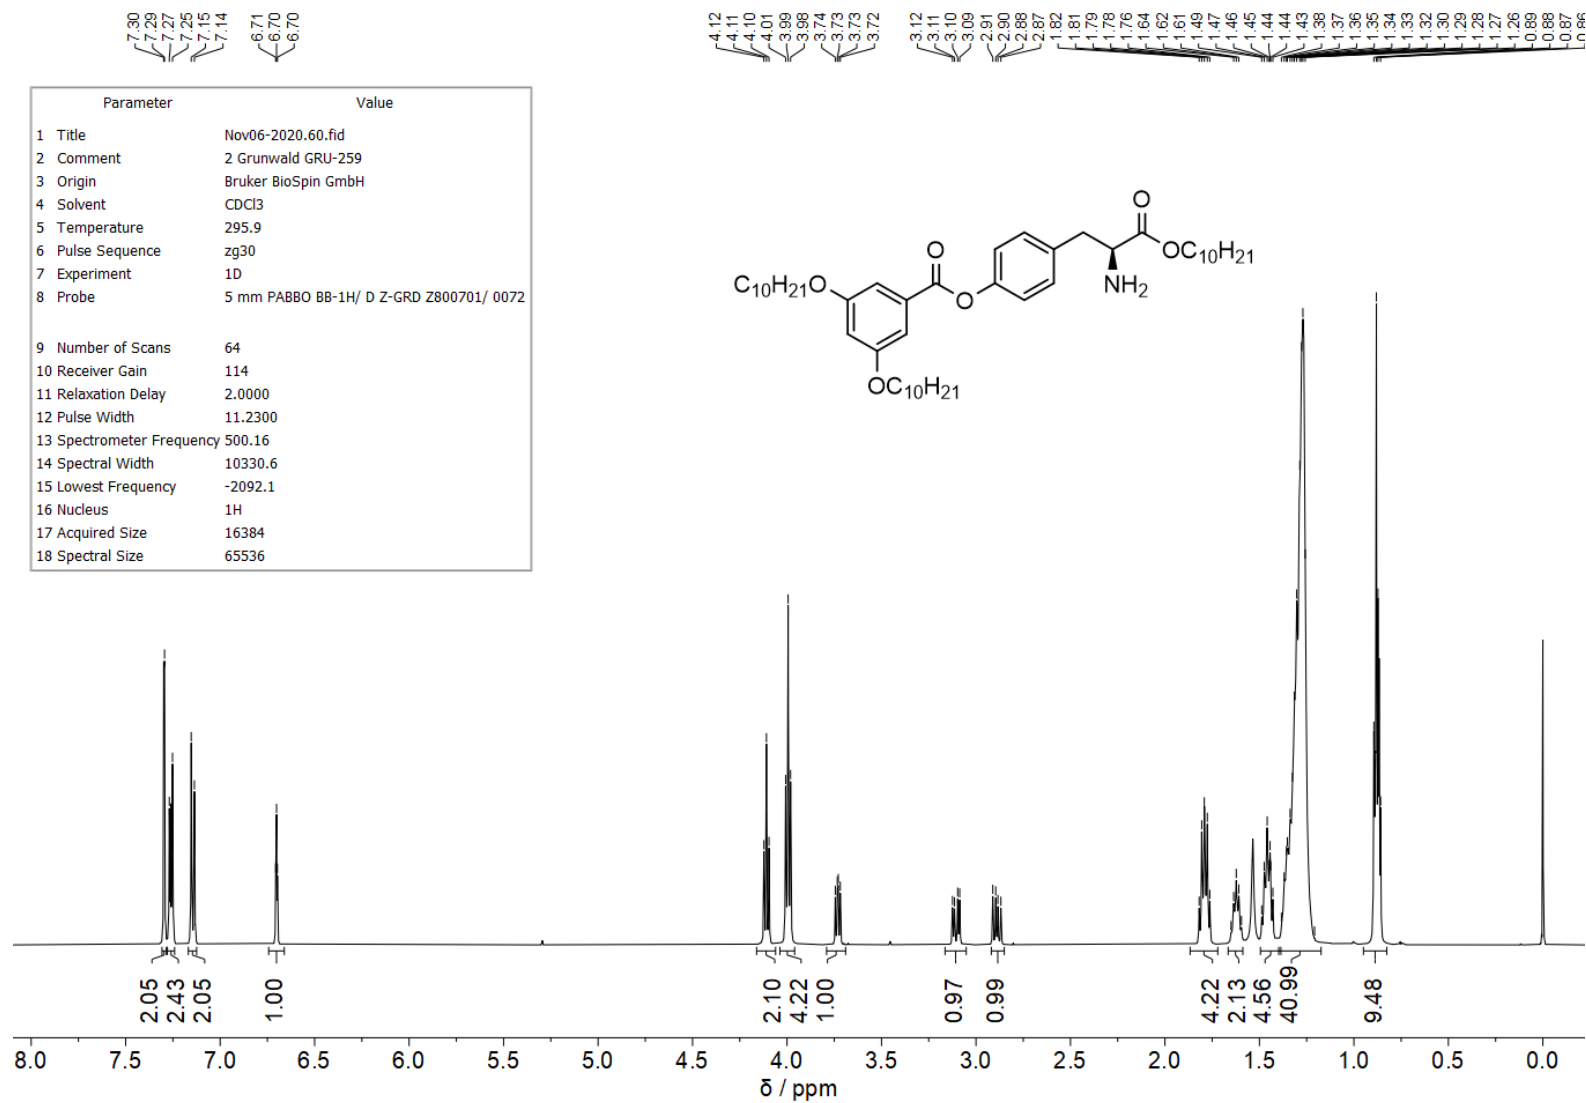

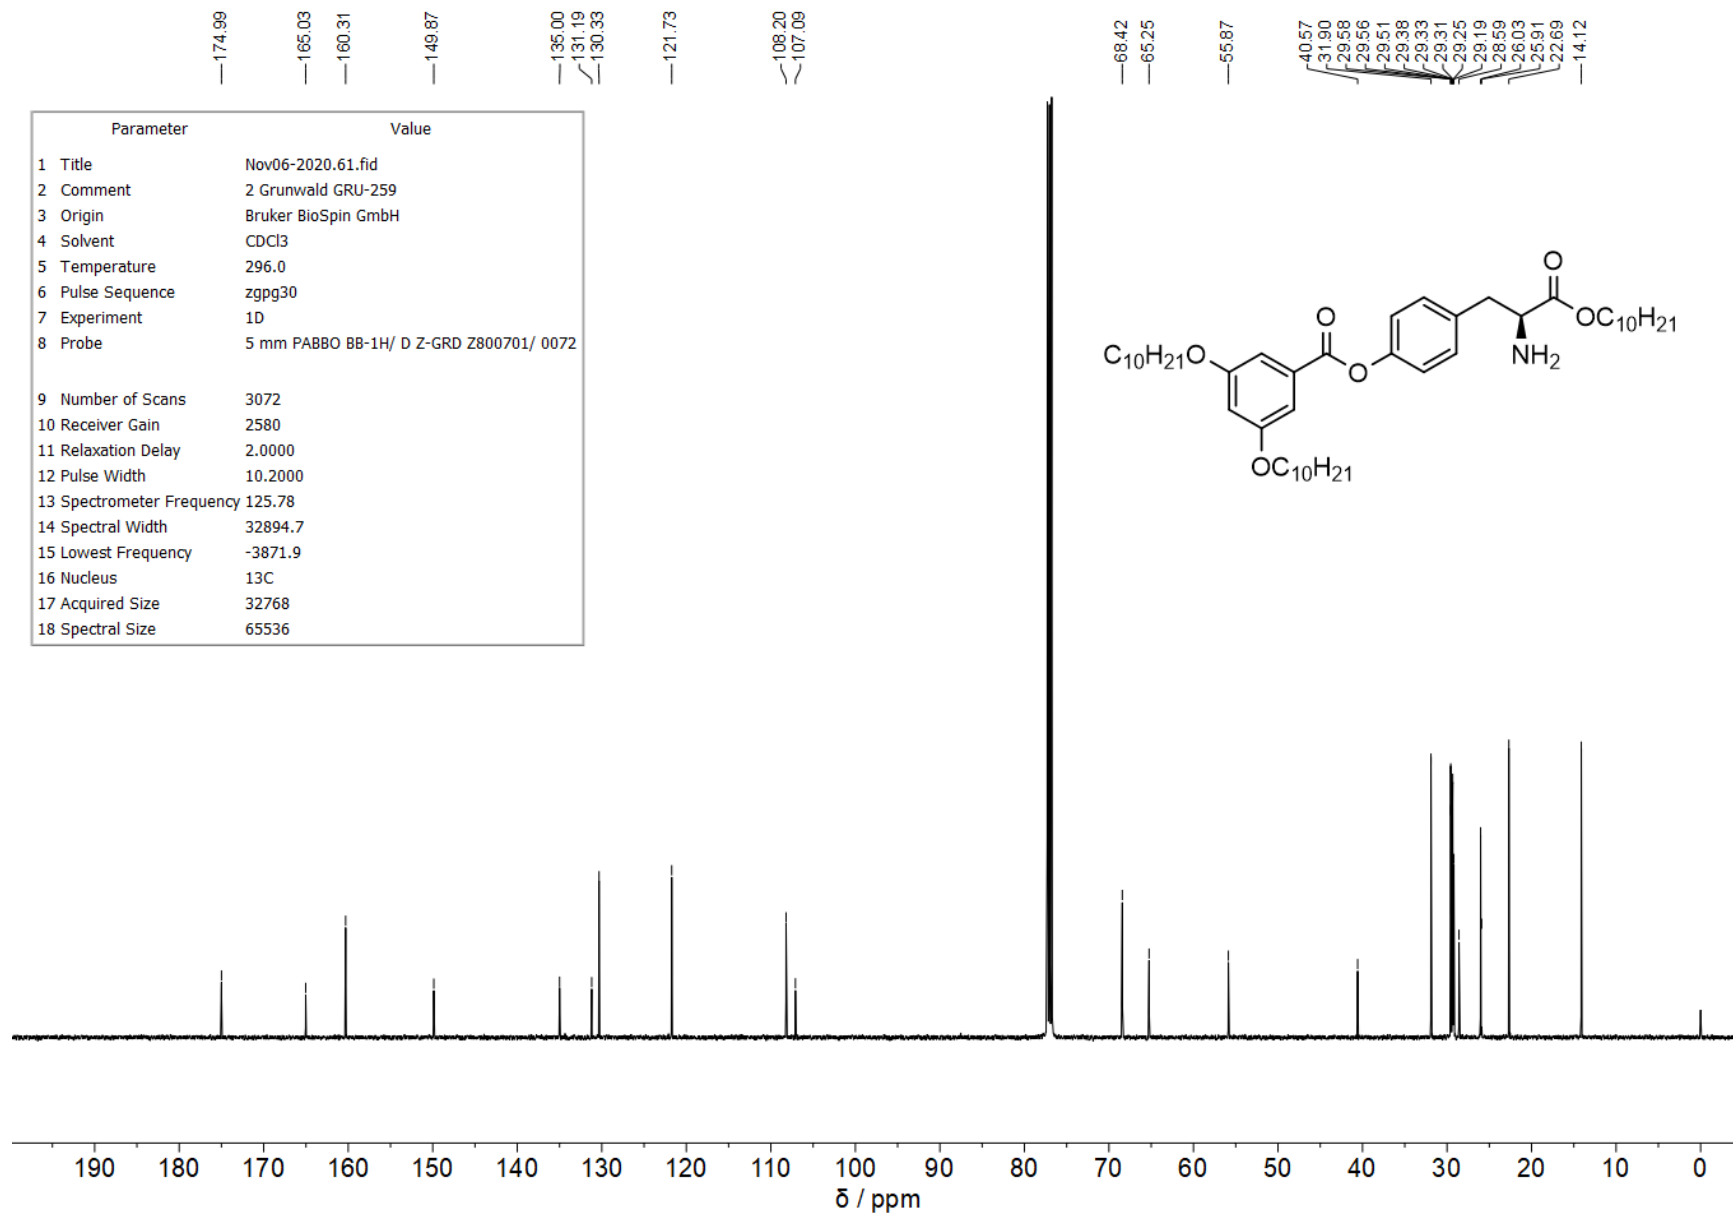

3,5-C<sub>12</sub>TyrC<sub>10</sub>NH<sub>2</sub>

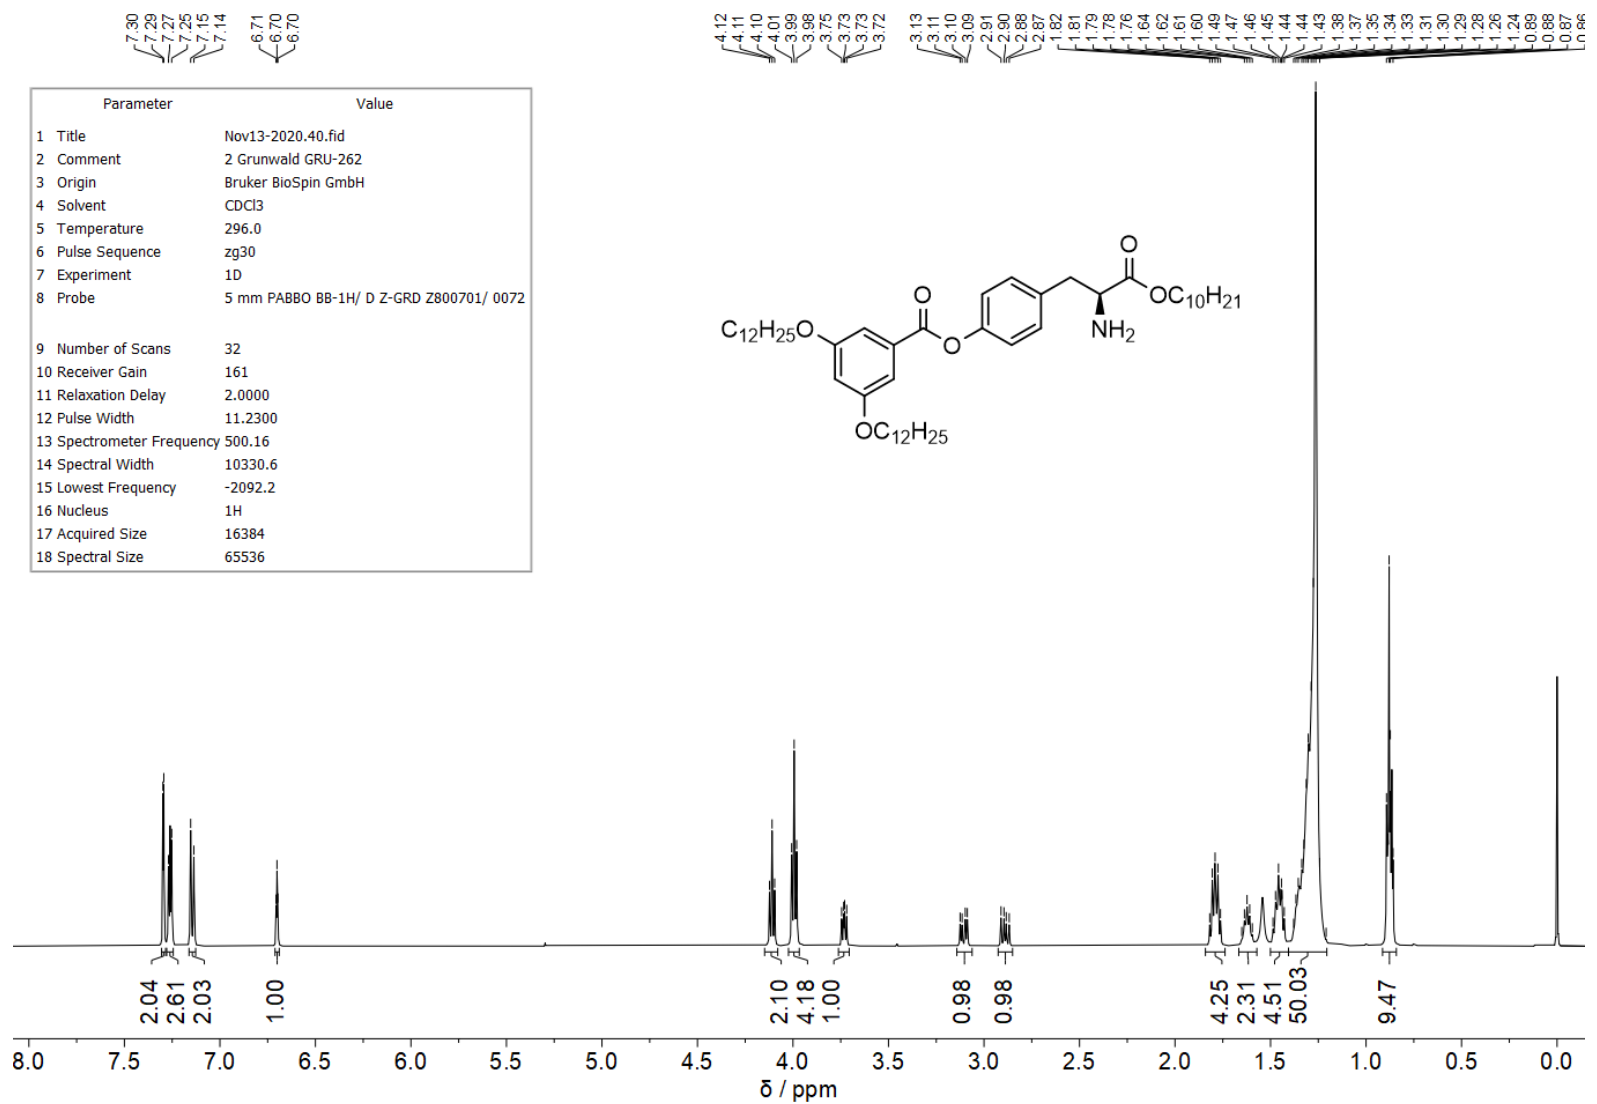

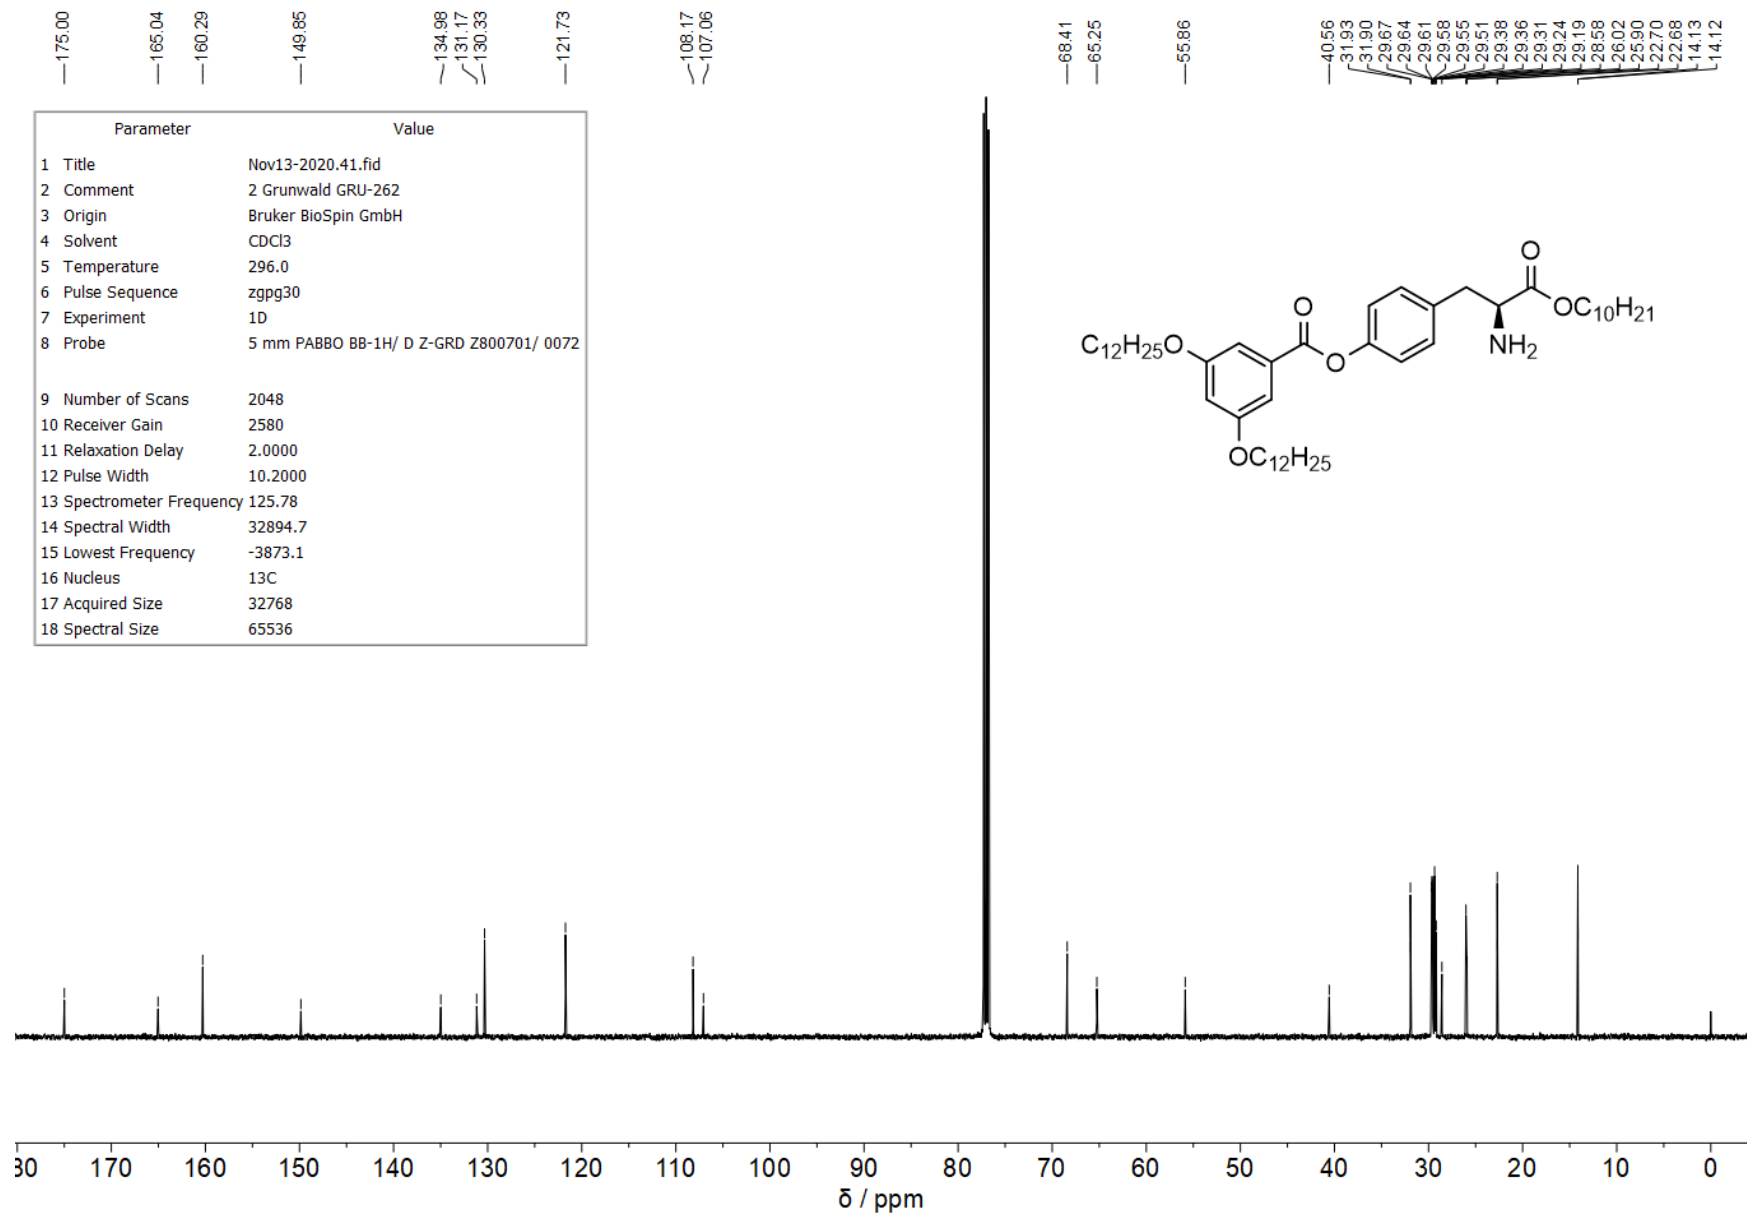

3,5-C<sub>14</sub>TyrC<sub>10</sub>NH<sub>2</sub>

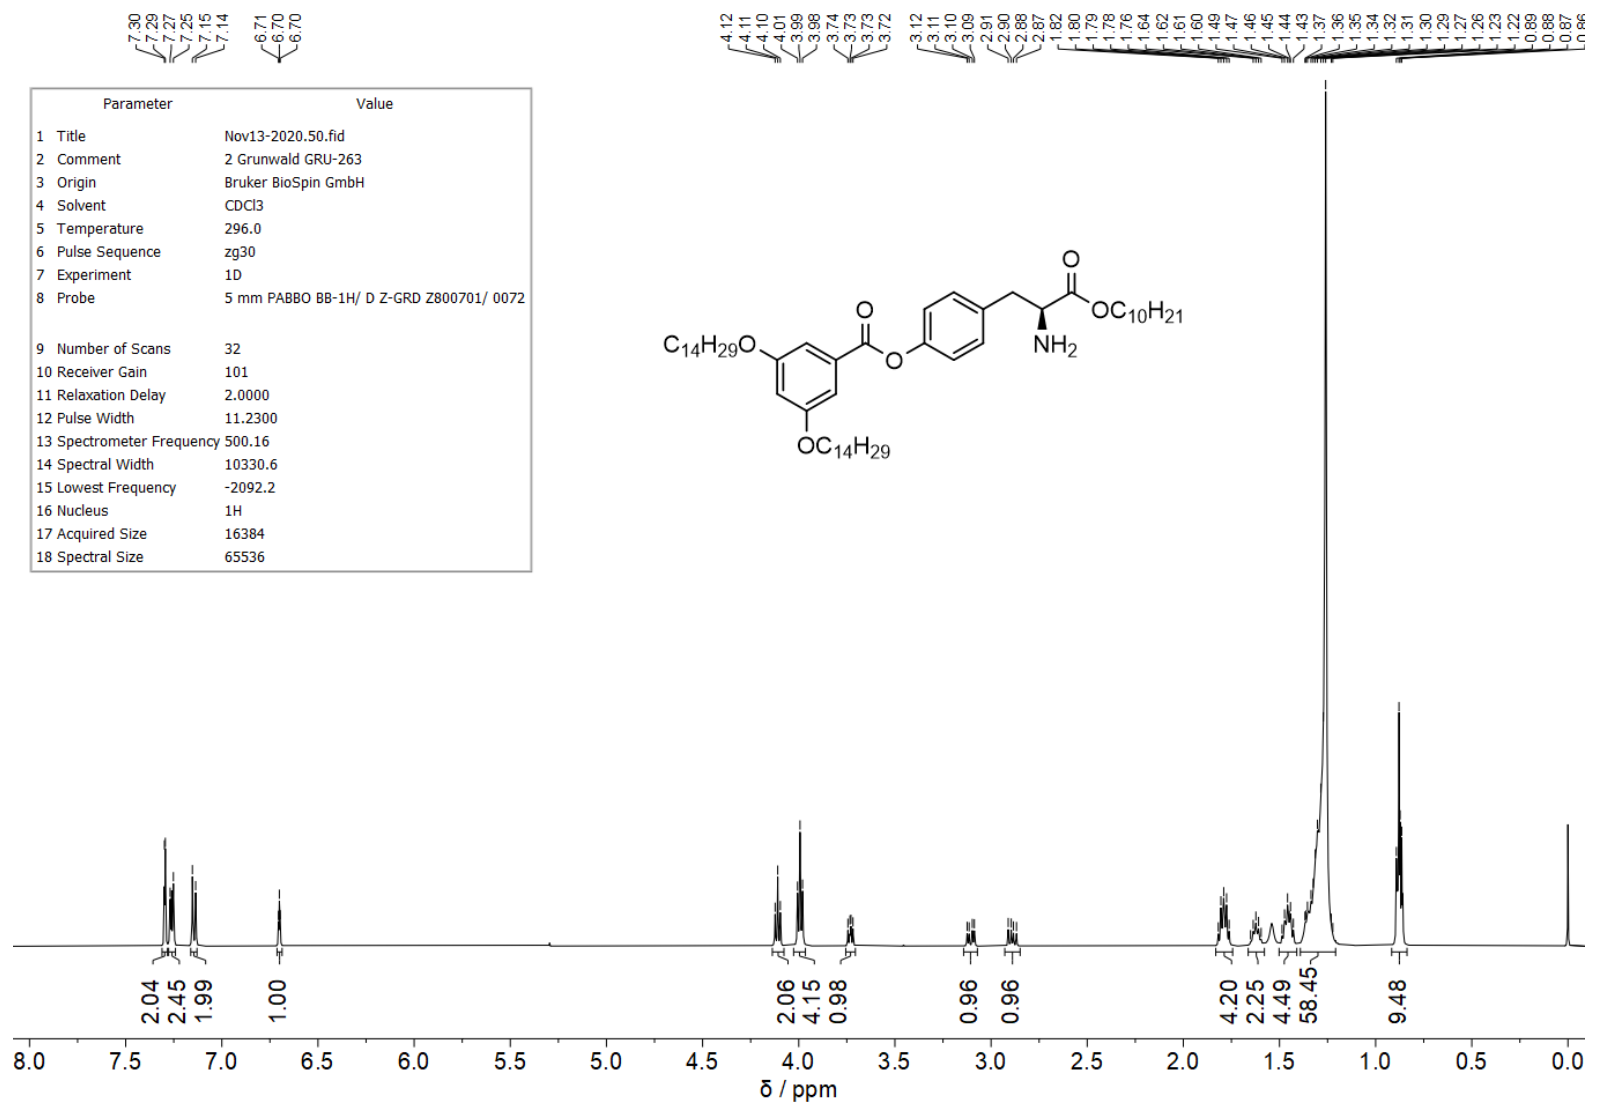

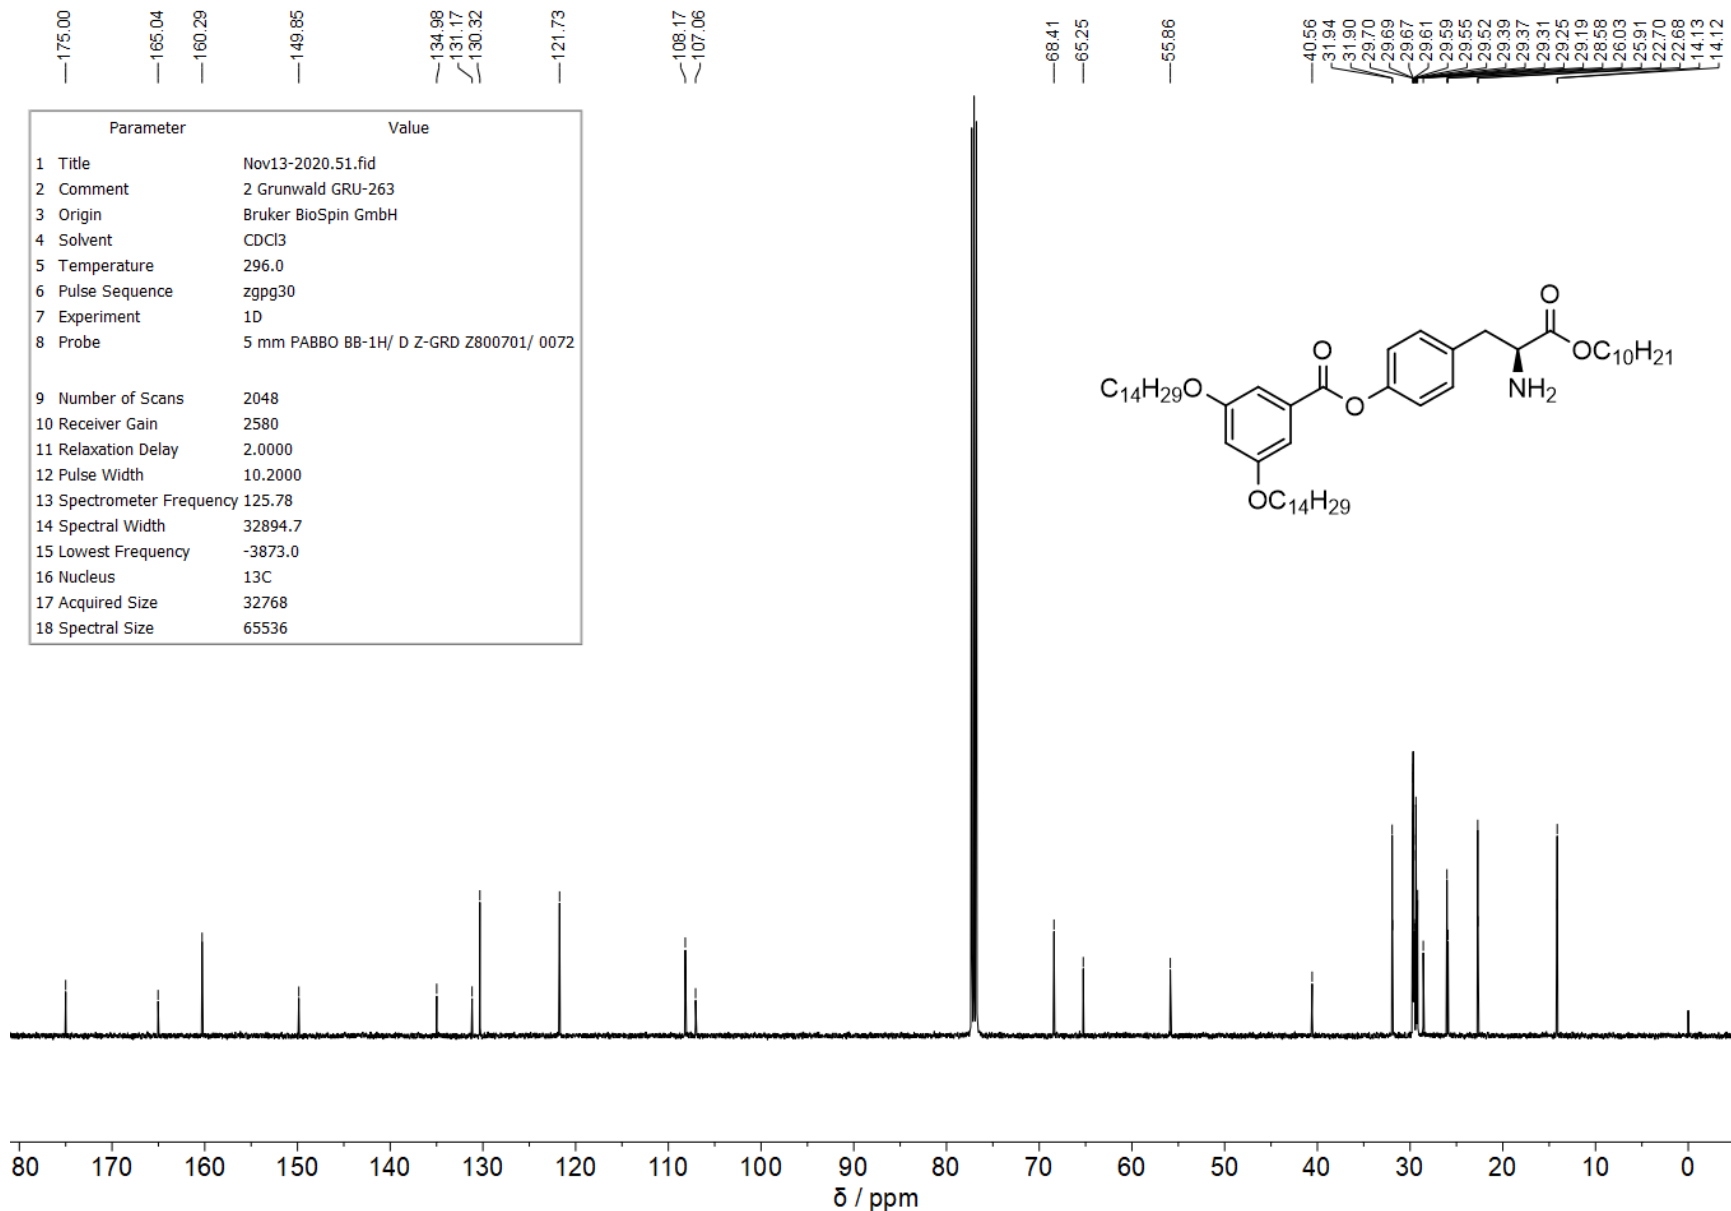

3,5-C<sub>10</sub>TyrC<sub>12</sub>NH<sub>2</sub>

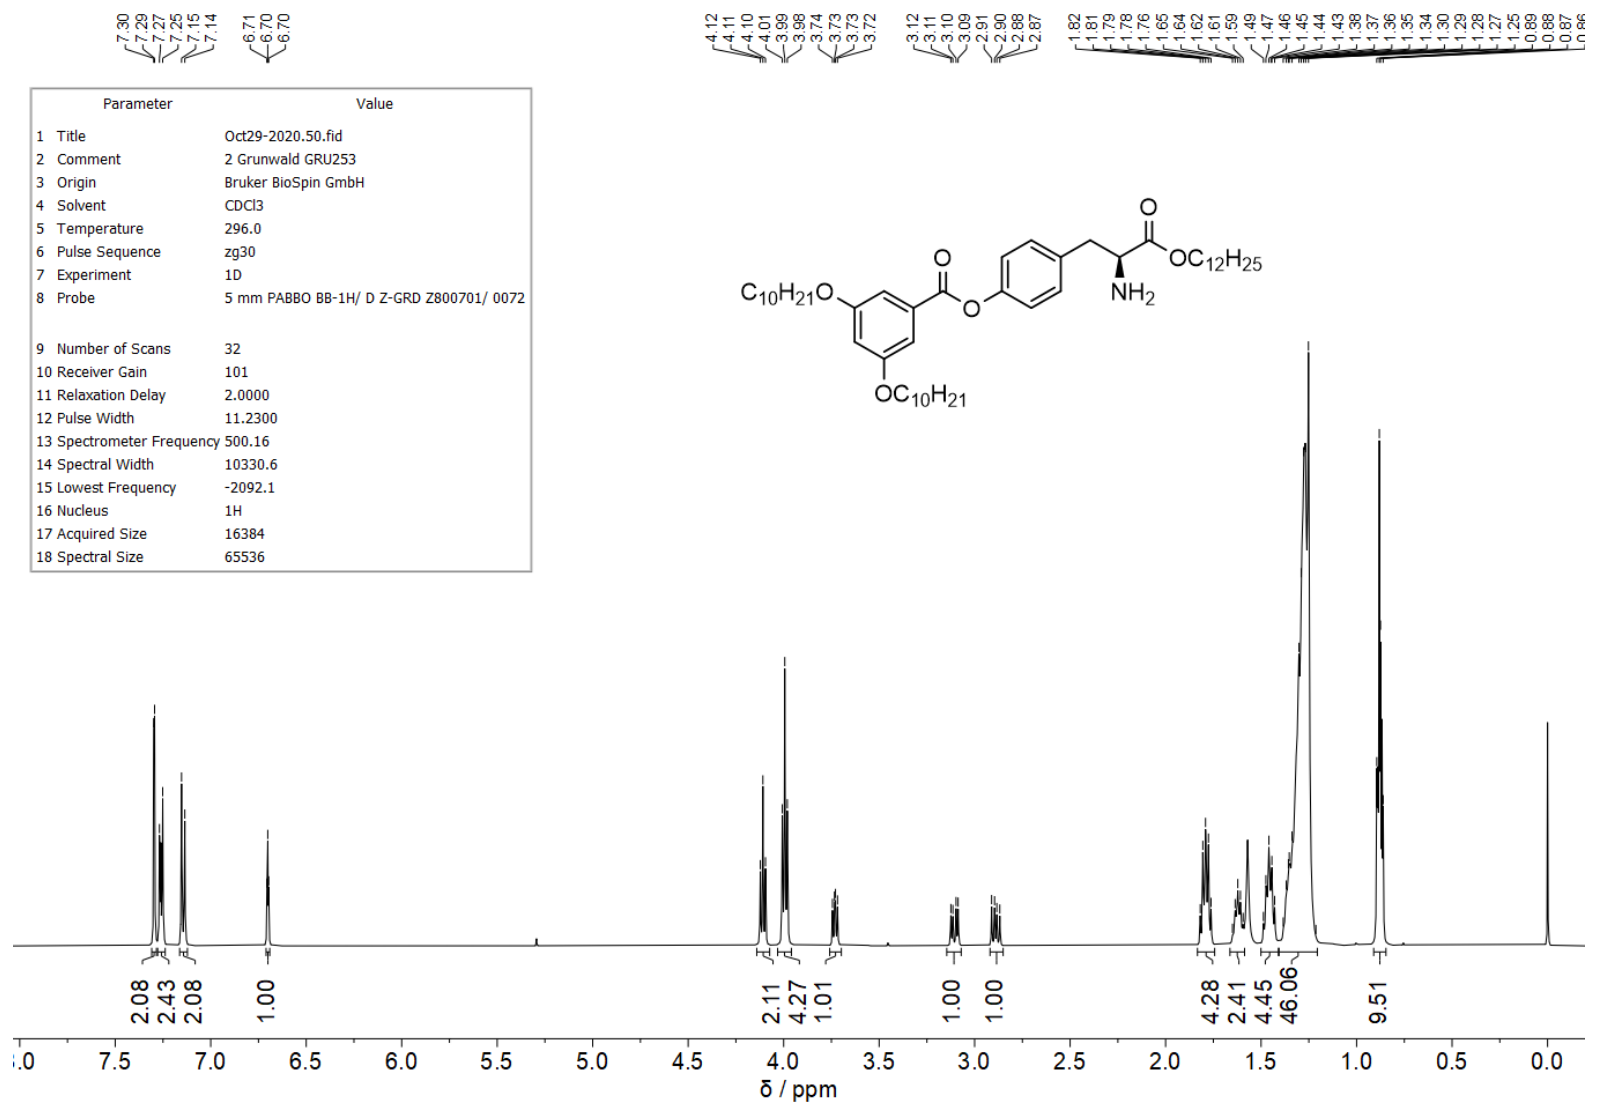



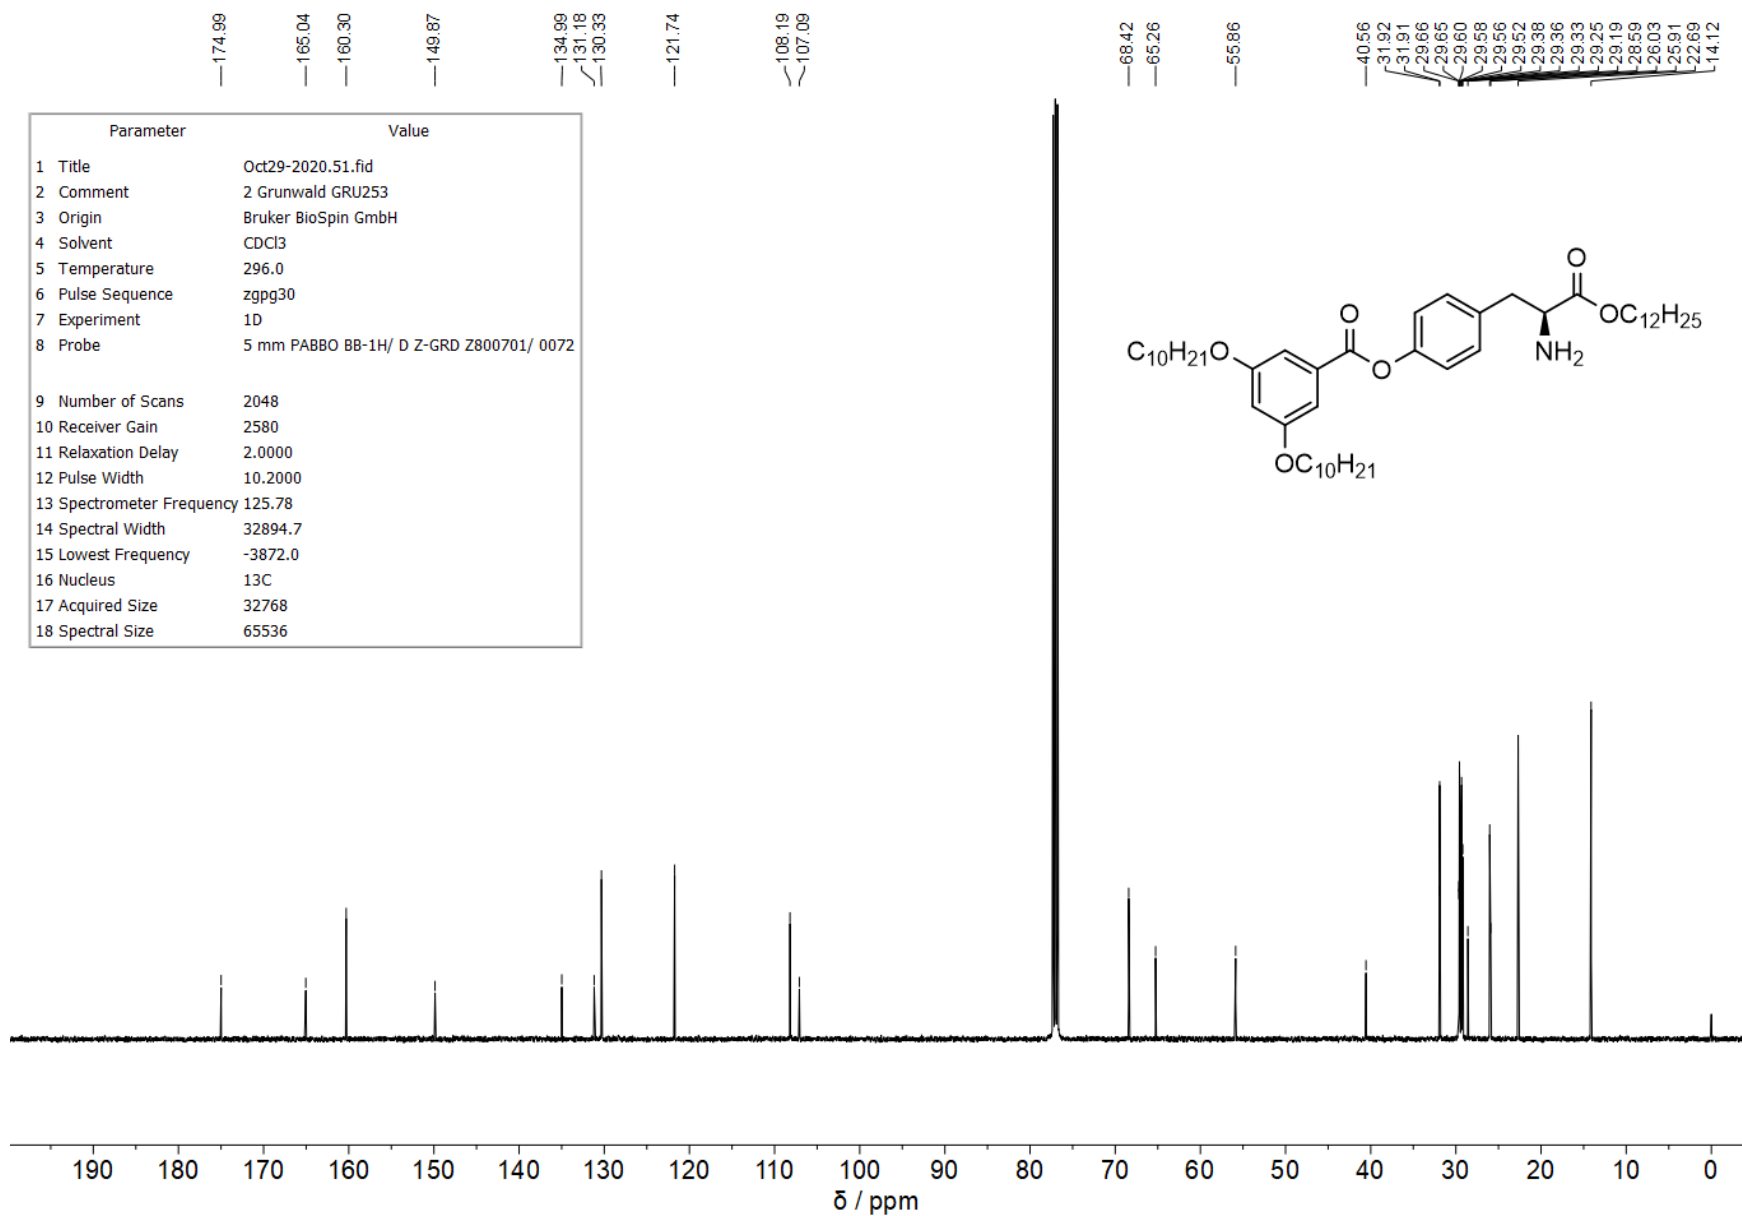

| Parameter                 | Value                                   |
|---------------------------|-----------------------------------------|
| 1 Title                   | Oct29-2020.51.fid                       |
| 2 Comment                 | 2 Grunwald GRU253                       |
| 3 Origin                  | Bruker BioSpin GmbH                     |
| 4 Solvent                 | CDCl3                                   |
| 5 Temperature             | 296.0                                   |
| 6 Pulse Sequence          | zgpg30                                  |
| 7 Experiment              | 1D                                      |
| 8 Probe                   | 5 mm PABBO BB-1H/ D Z-GRD Z800701/ 0072 |
| 9 Number of Scans         | 2048                                    |
| 10 Receiver Gain          | 2580                                    |
| 11 Relaxation Delay       | 2.0000                                  |
| 12 Pulse Width            | 10.2000                                 |
| 13 Spectrometer Frequency | 125.78                                  |
| 14 Spectral Width         | 32894.7                                 |
| 15 Lowest Frequency       | -3872.0                                 |
| 16 Nucleus                | 13C                                     |
| 17 Acquired Size          | 32768                                   |
| 18 Spectral Size          | 65536                                   |

3,5-C<sub>12</sub>TyrC<sub>12</sub>NH<sub>2</sub>

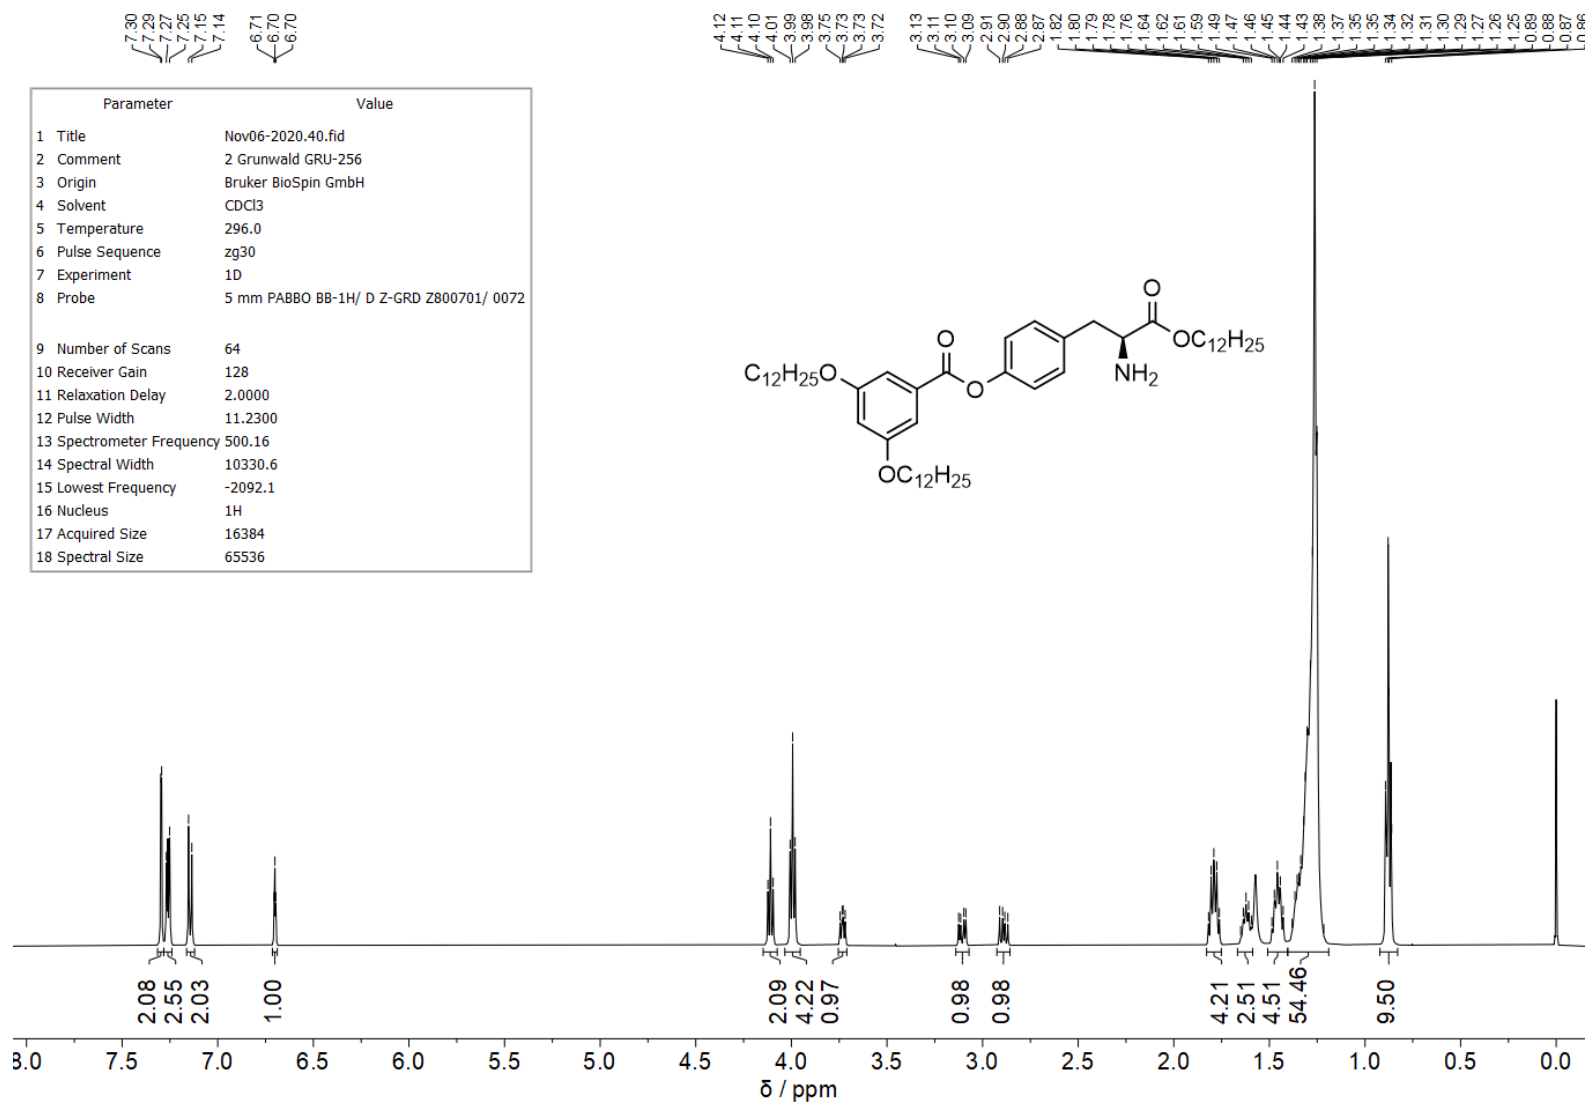

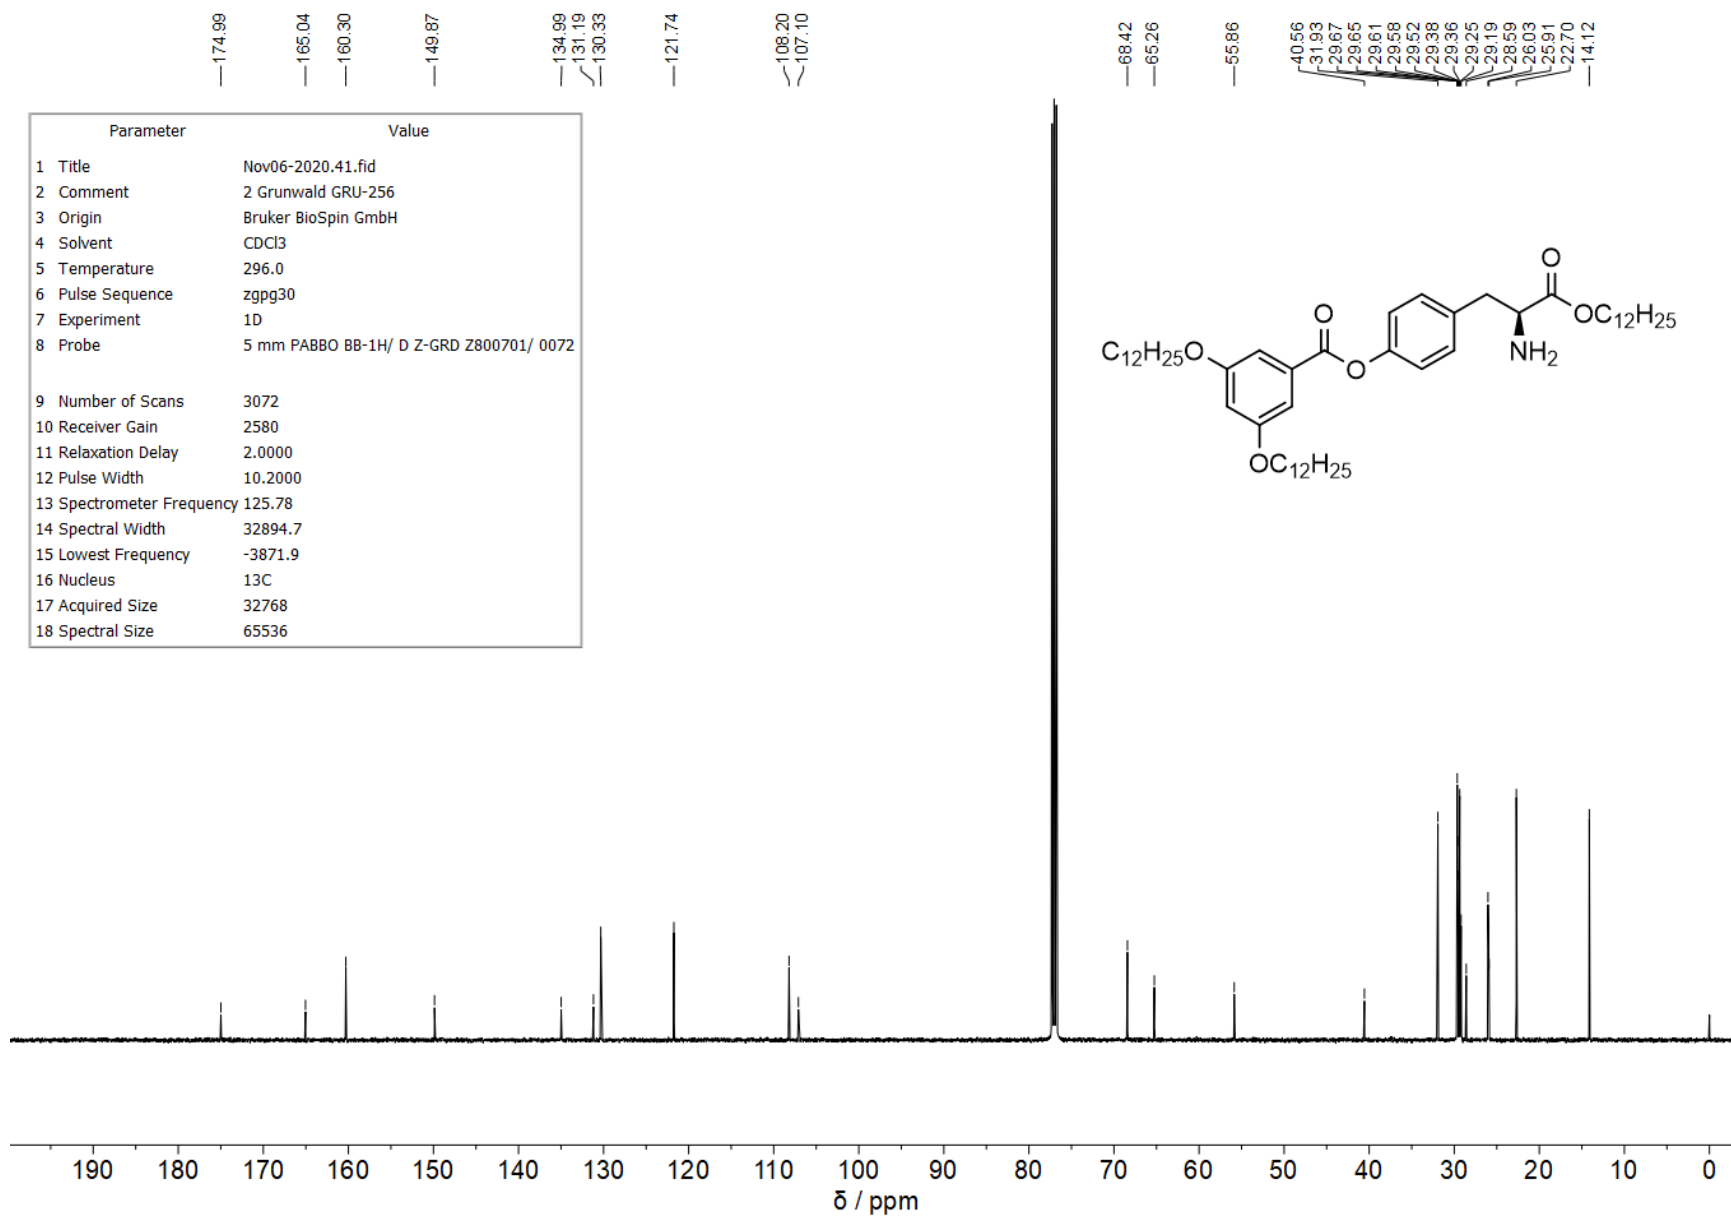

| Parameter                 | Value                                   |
|---------------------------|-----------------------------------------|
| 1 Title                   | Nov06-2020.41.fid                       |
| 2 Comment                 | 2 Grunwald GRU-256                      |
| 3 Origin                  | Bruker BioSpin GmbH                     |
| 4 Solvent                 | CDCl3                                   |
| 5 Temperature             | 296.0                                   |
| 6 Pulse Sequence          | zgpg30                                  |
| 7 Experiment              | 1D                                      |
| 8 Probe                   | 5 mm PABBO BB-1H/ D Z-GRD Z800701/ 0072 |
| 9 Number of Scans         | 3072                                    |
| 10 Receiver Gain          | 2580                                    |
| 11 Relaxation Delay       | 2.0000                                  |
| 12 Pulse Width            | 10.2000                                 |
| 13 Spectrometer Frequency | 125.78                                  |
| 14 Spectral Width         | 32894.7                                 |
| 15 Lowest Frequency       | -3871.9                                 |
| 16 Nucleus                | 13C                                     |
| 17 Acquired Size          | 32768                                   |
| 18 Spectral Size          | 65536                                   |

174.99  
 165.04  
 160.30  
 149.87  
 134.99  
 131.19  
 130.33  
 121.74  
 108.20  
 107.10  
 68.42  
 65.26  
 55.86  
 40.56  
 31.93  
 29.67  
 29.65  
 29.61  
 29.58  
 29.52  
 29.38  
 29.36  
 29.25  
 29.19  
 28.59  
 26.03  
 25.91  
 22.70  
 14.12

3,5-C<sub>14</sub>TyrC<sub>12</sub>NH<sub>2</sub>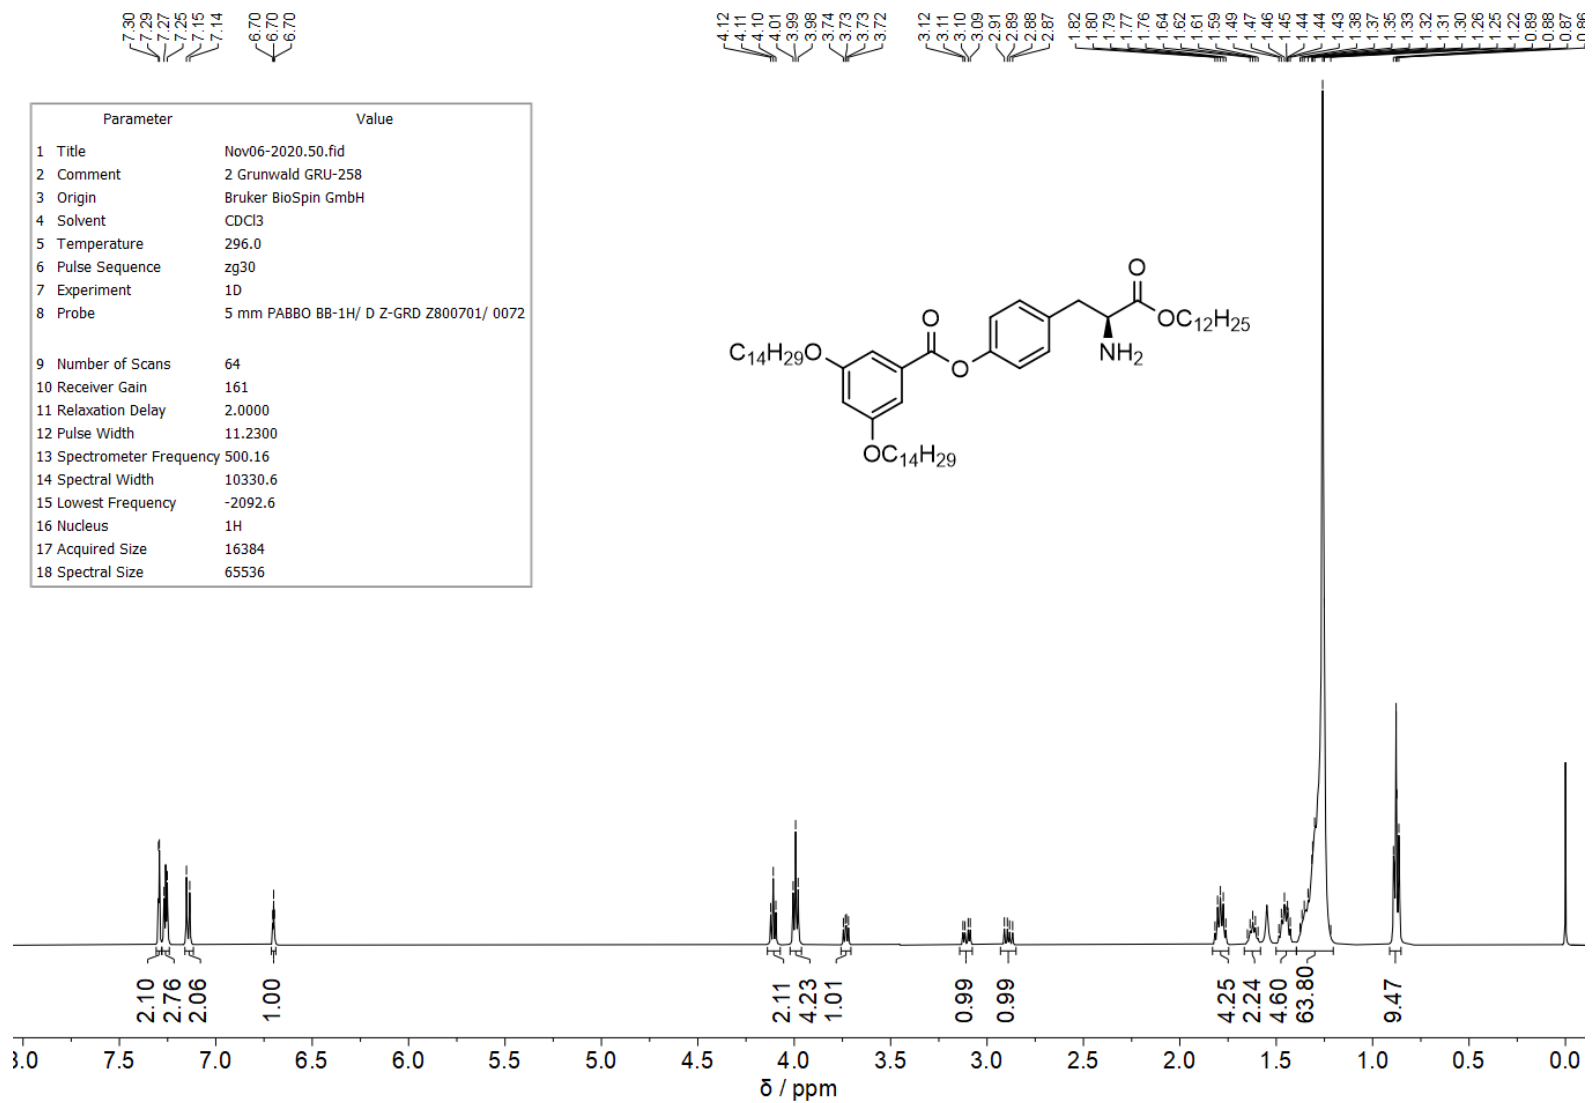

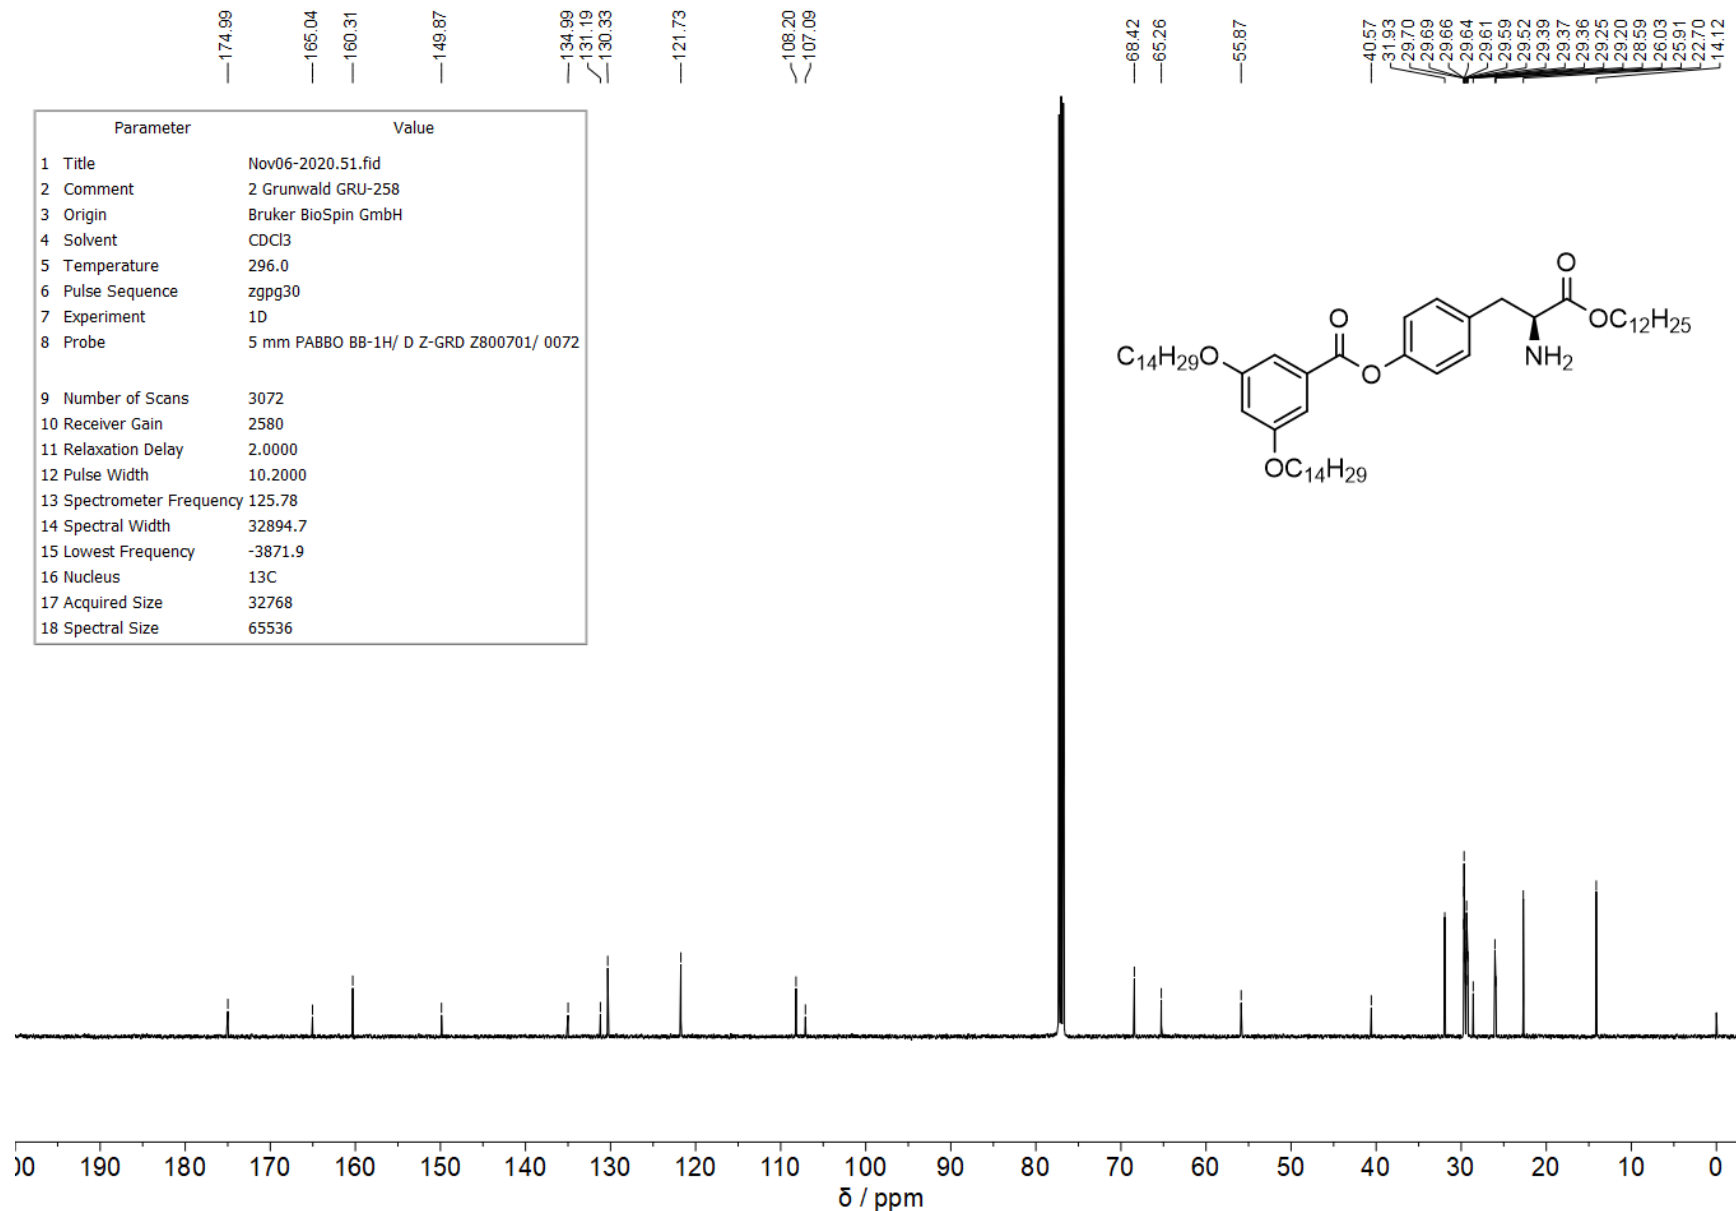

3,5-C<sub>10</sub>TyrC<sub>14</sub>NH<sub>2</sub>

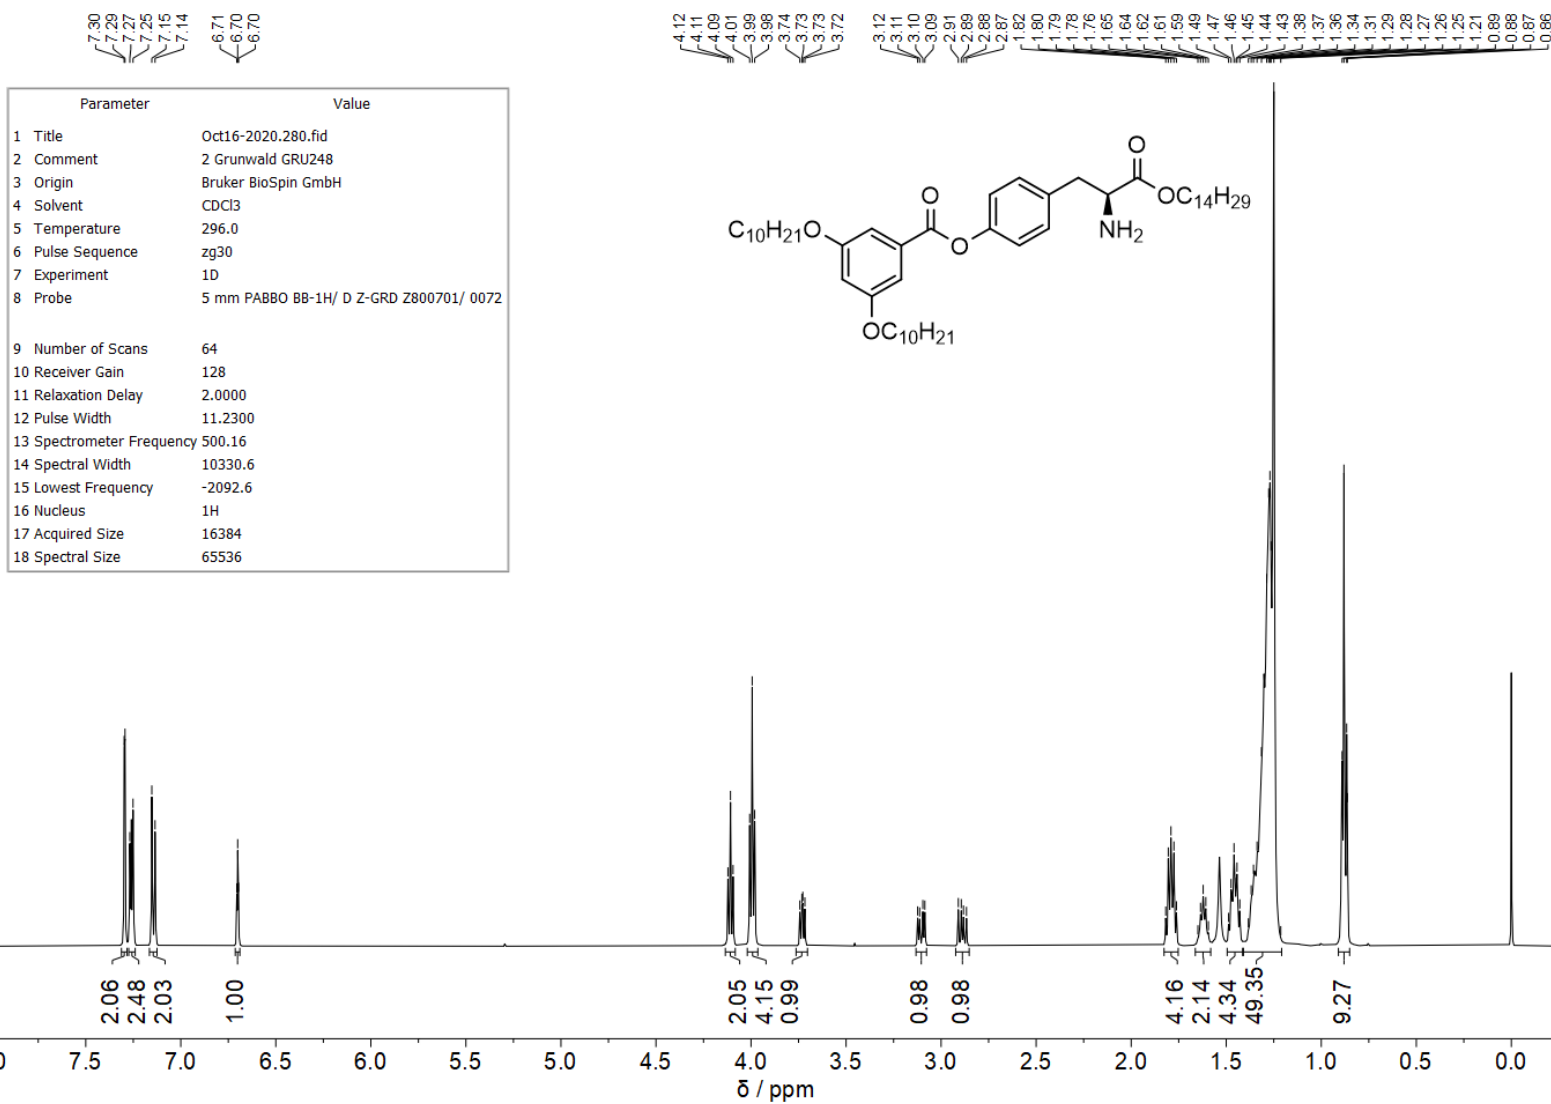

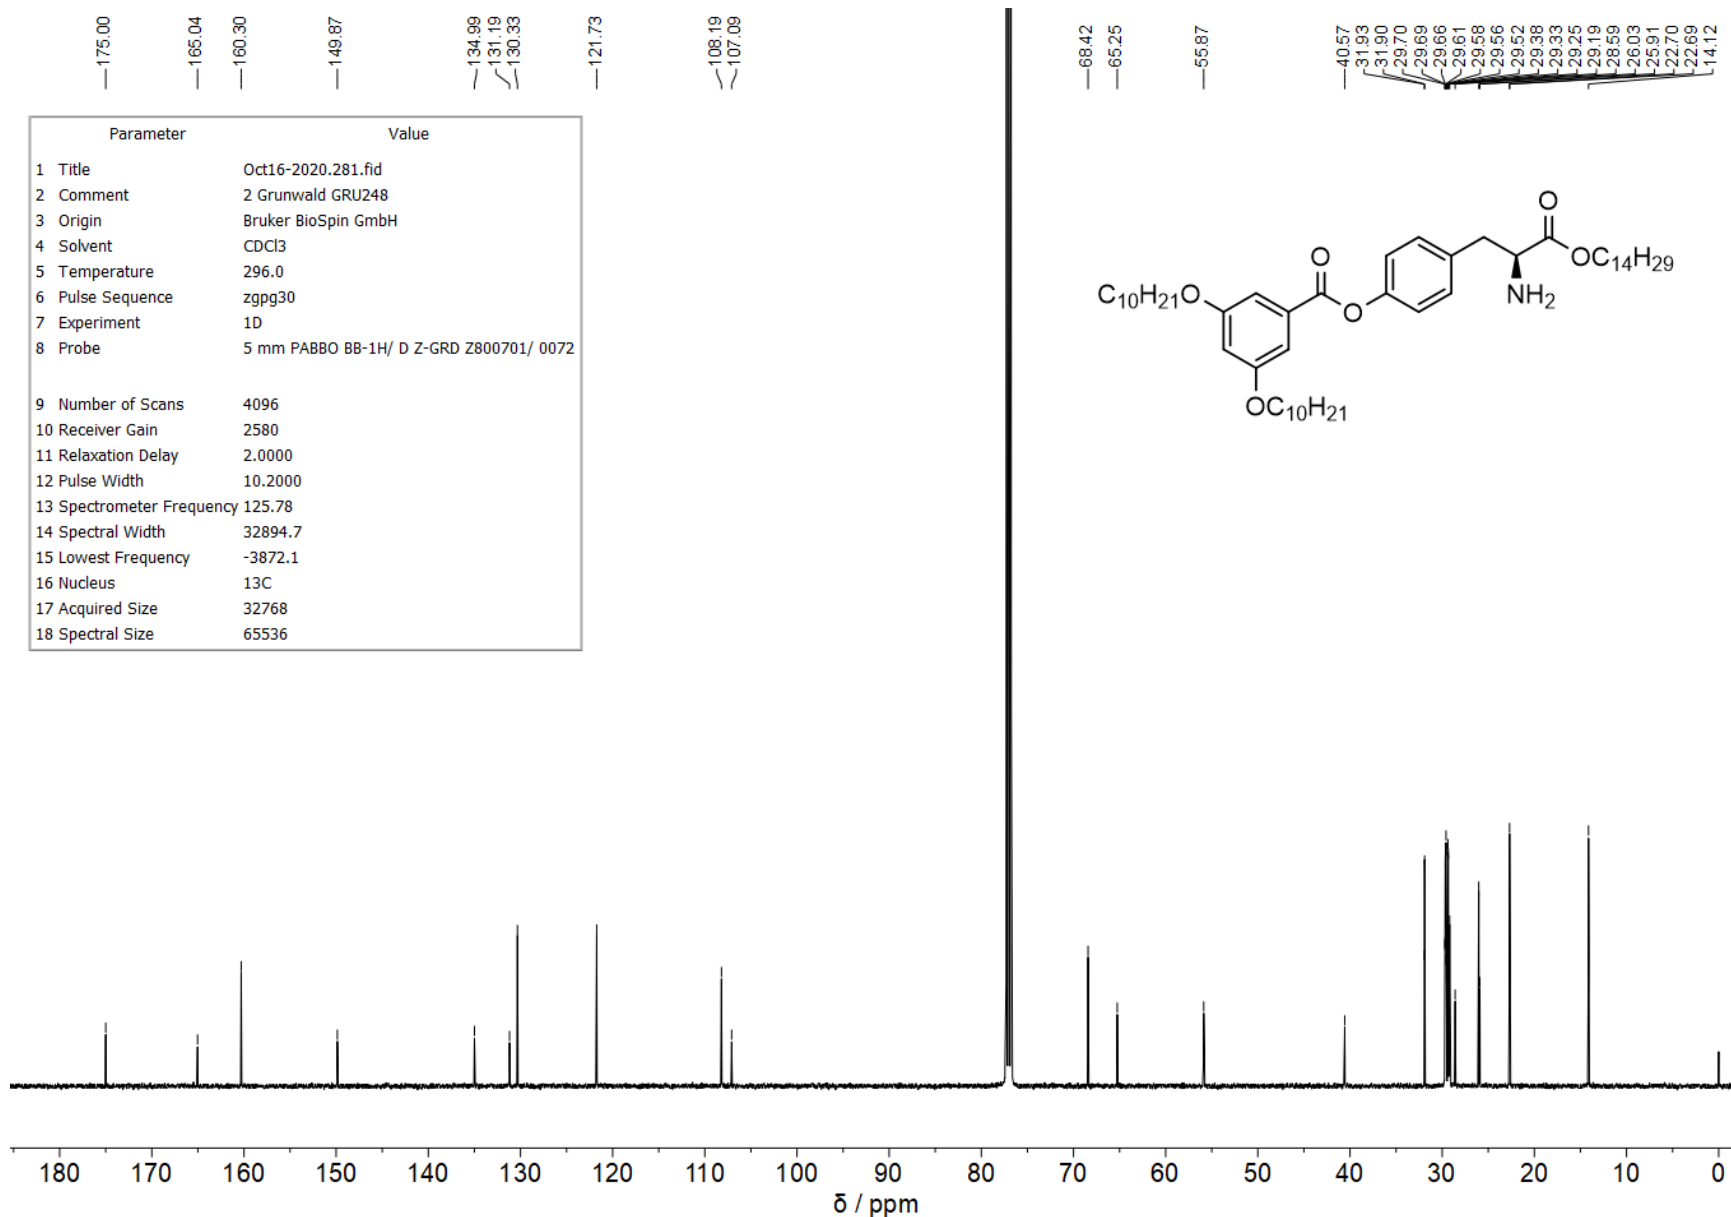

3,5-C<sub>12</sub>TyrC<sub>14</sub>NH<sub>2</sub>

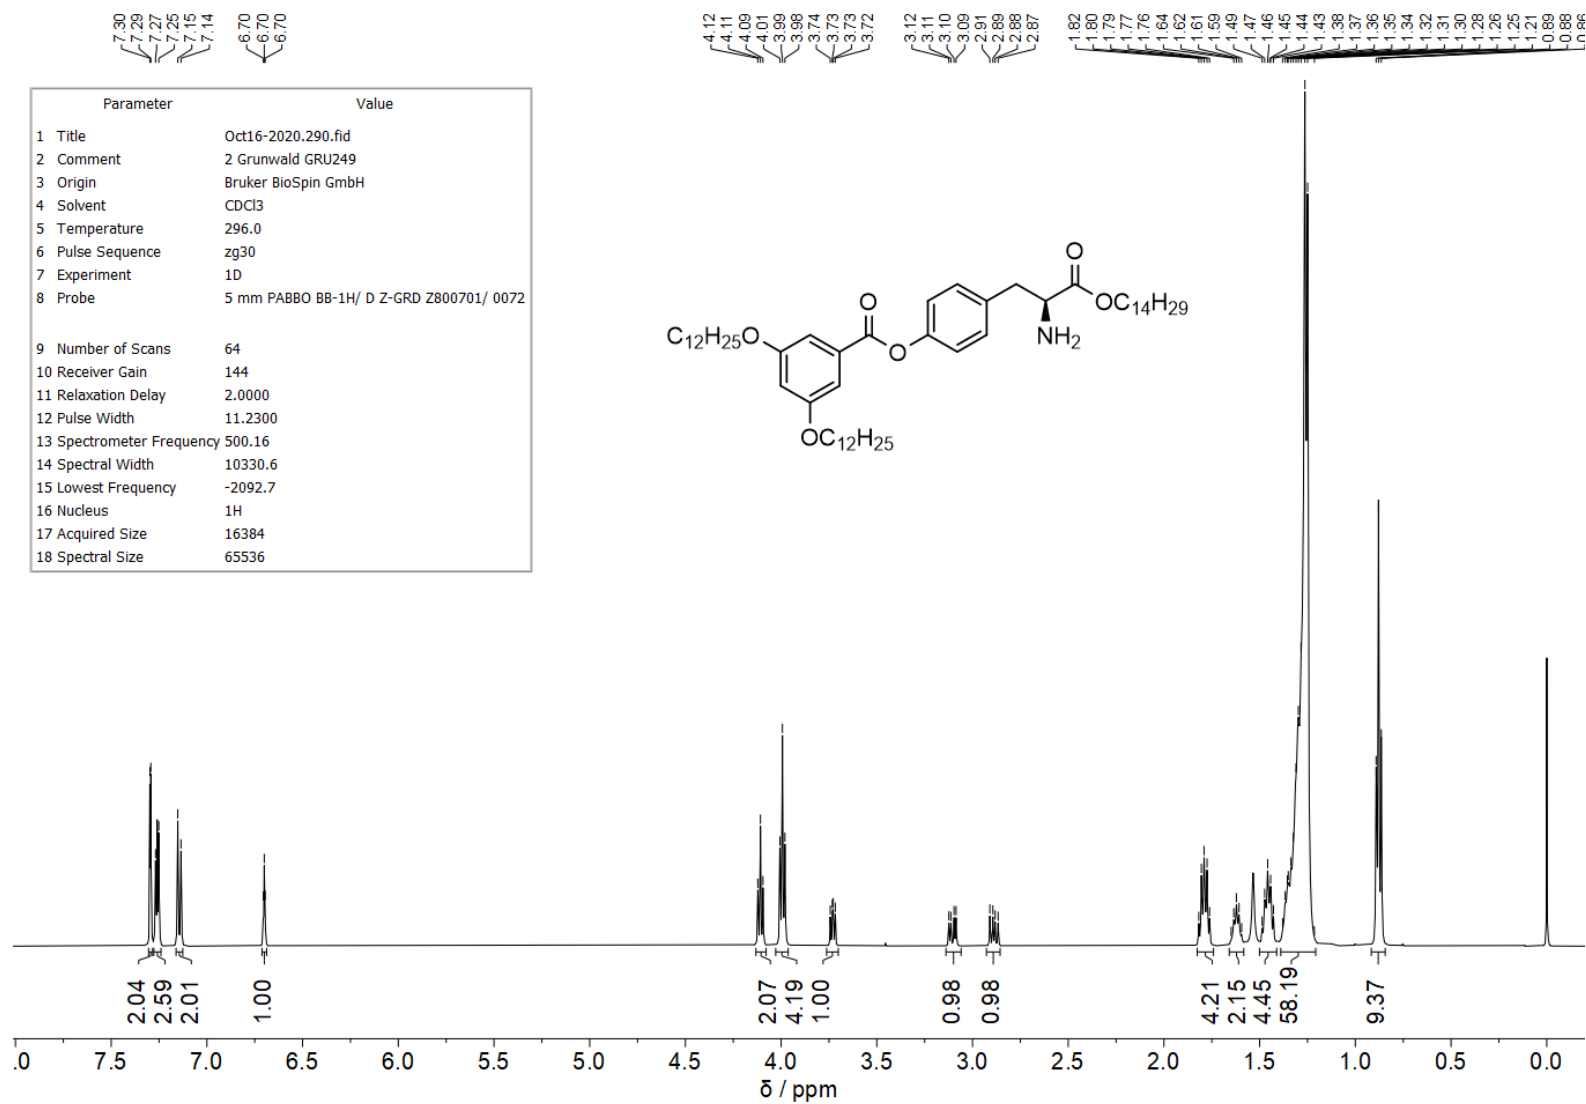



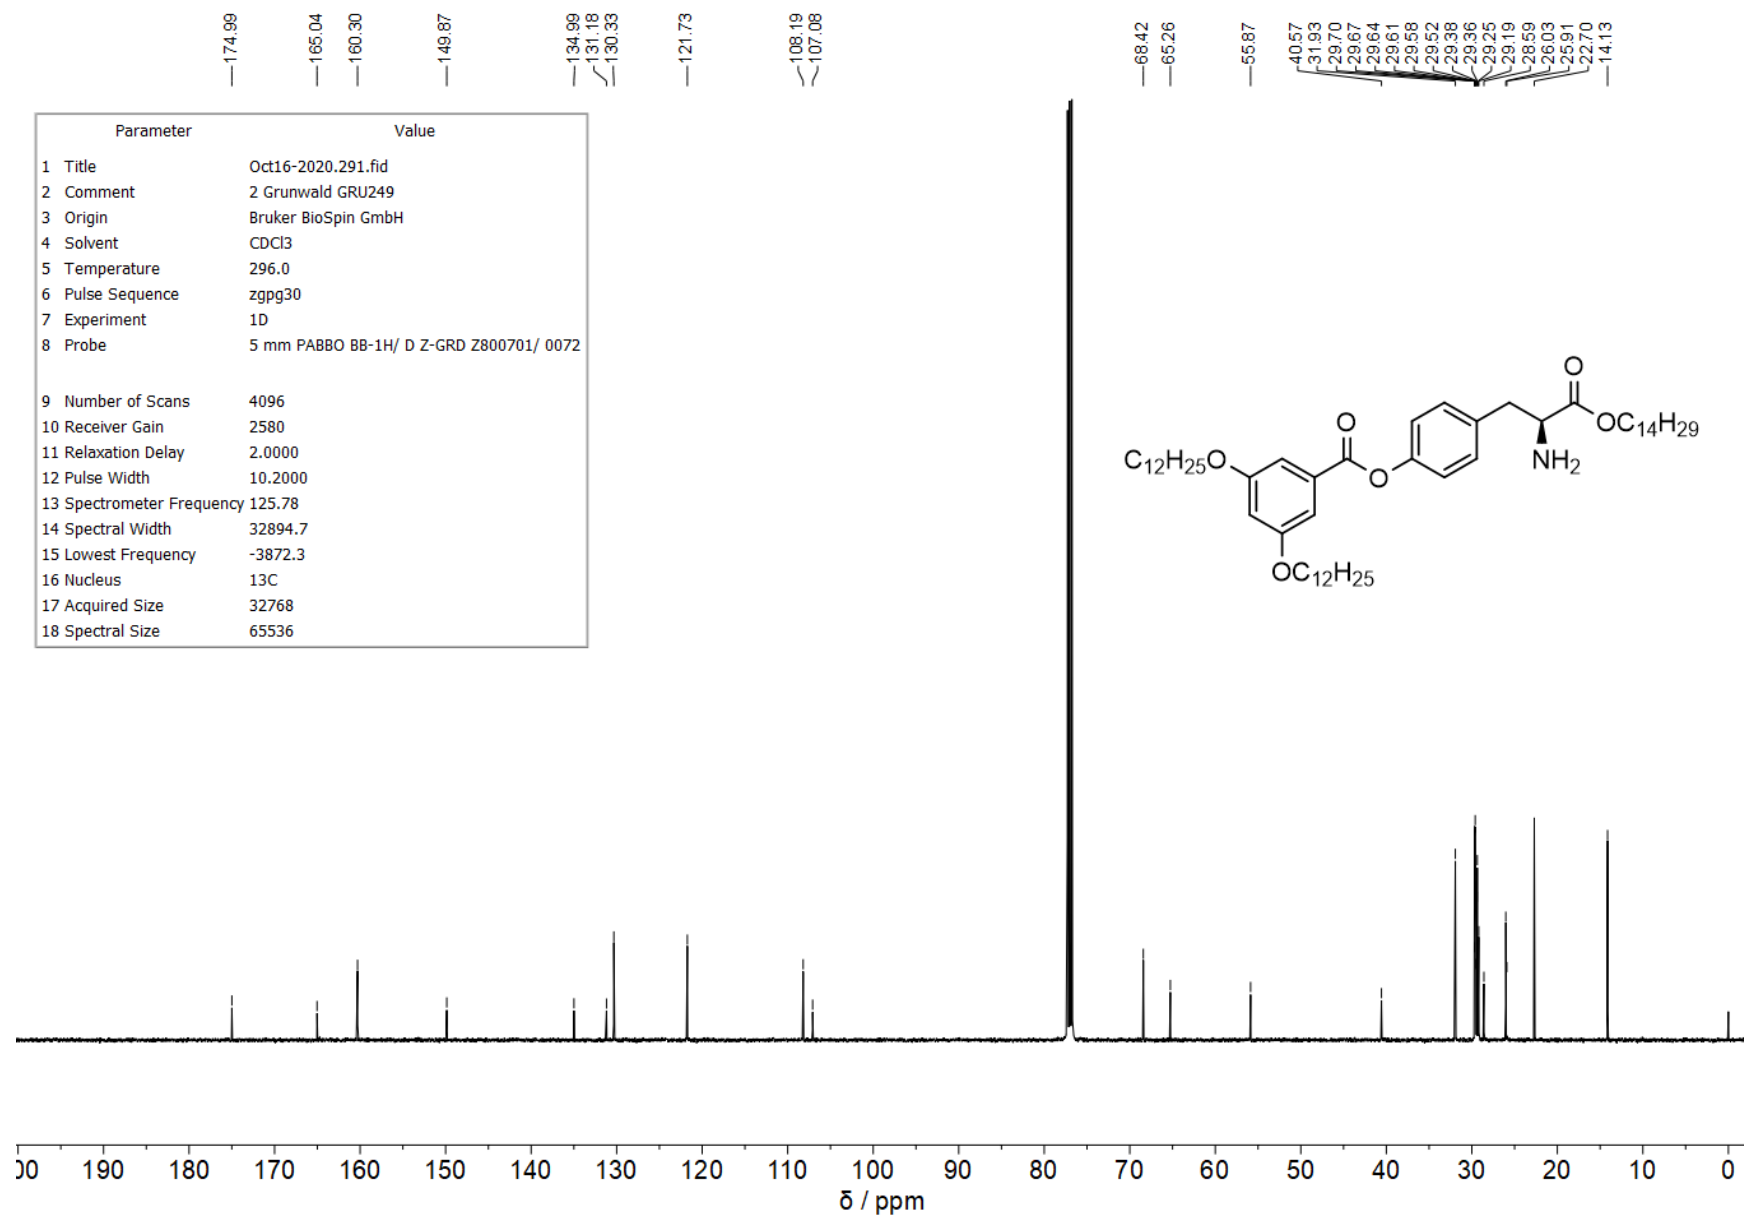

3,5-C<sub>14</sub>TyrC<sub>14</sub>NH<sub>2</sub>

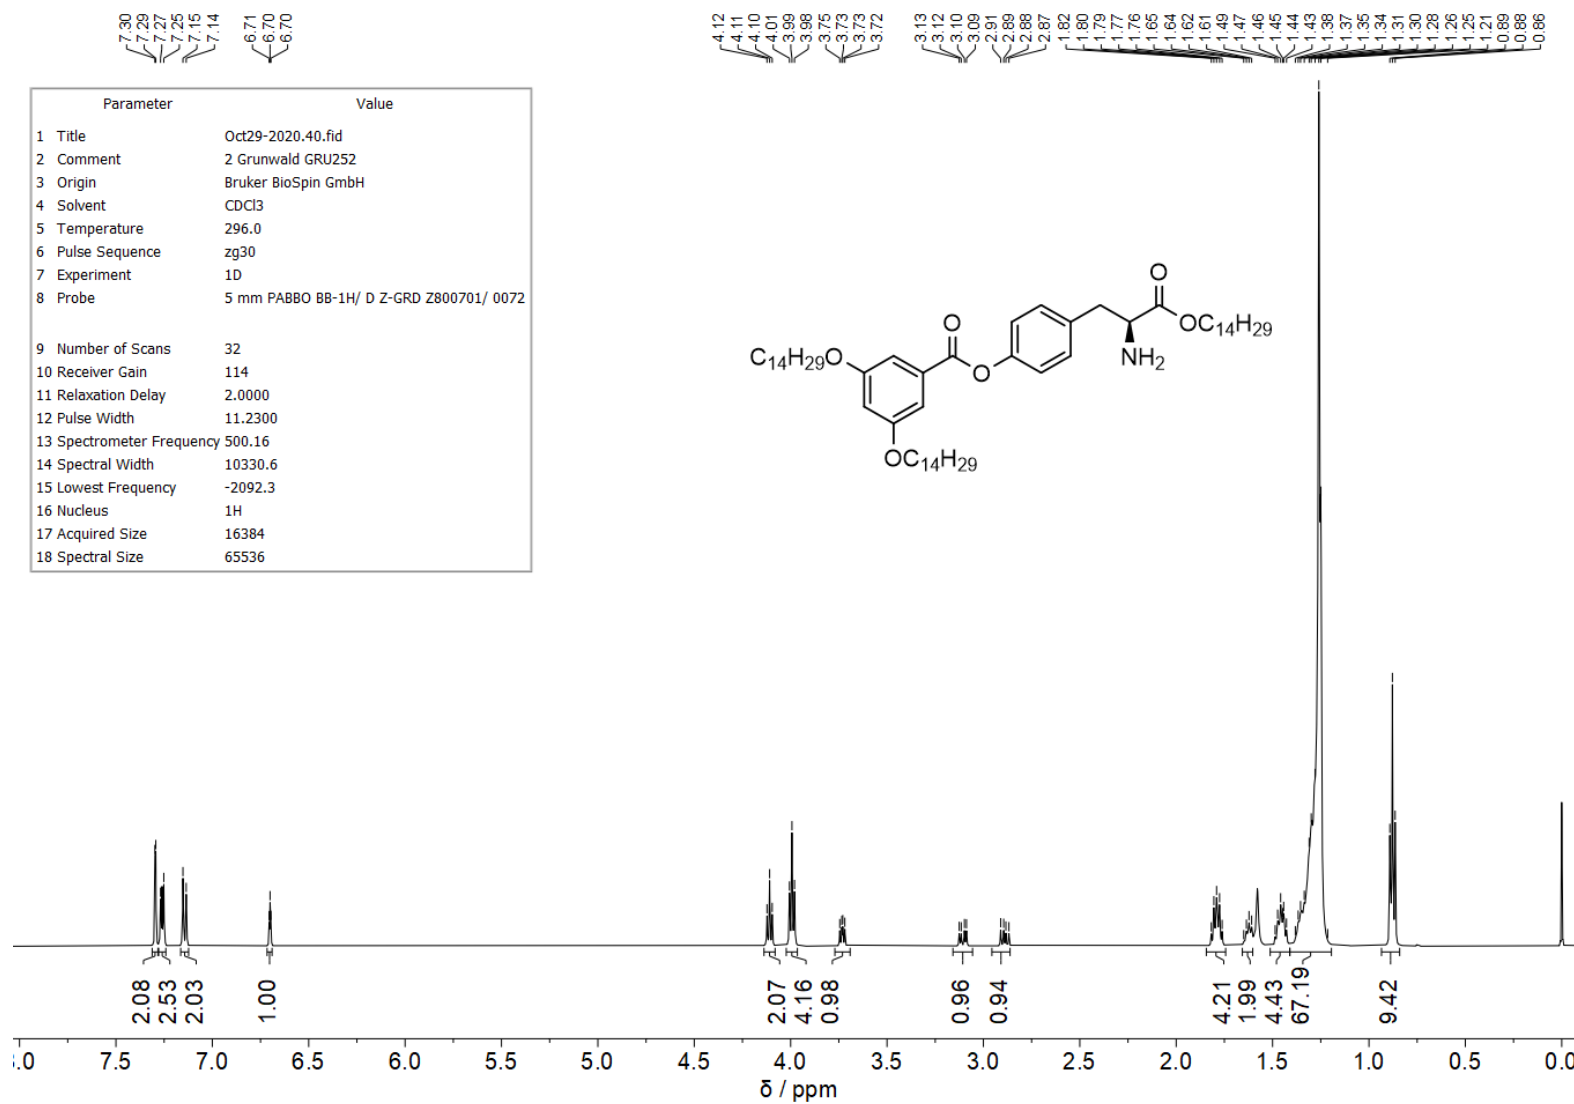

| Parameter                 | Value                                   |
|---------------------------|-----------------------------------------|
| 1 Title                   | Oct29-2020.40.fid                       |
| 2 Comment                 | 2 Grunwald GRU252                       |
| 3 Origin                  | Bruker BioSpin GmbH                     |
| 4 Solvent                 | CDCl <sub>3</sub>                       |
| 5 Temperature             | 296.0                                   |
| 6 Pulse Sequence          | zg30                                    |
| 7 Experiment              | 1D                                      |
| 8 Probe                   | 5 mm PABBO BB-1H/ D Z-GRD Z800701/ 0072 |
| 9 Number of Scans         | 32                                      |
| 10 Receiver Gain          | 114                                     |
| 11 Relaxation Delay       | 2.0000                                  |
| 12 Pulse Width            | 11.2300                                 |
| 13 Spectrometer Frequency | 500.16                                  |
| 14 Spectral Width         | 10330.6                                 |
| 15 Lowest Frequency       | -2092.3                                 |
| 16 Nucleus                | <sup>1</sup> H                          |
| 17 Acquired Size          | 16384                                   |
| 18 Spectral Size          | 65536                                   |

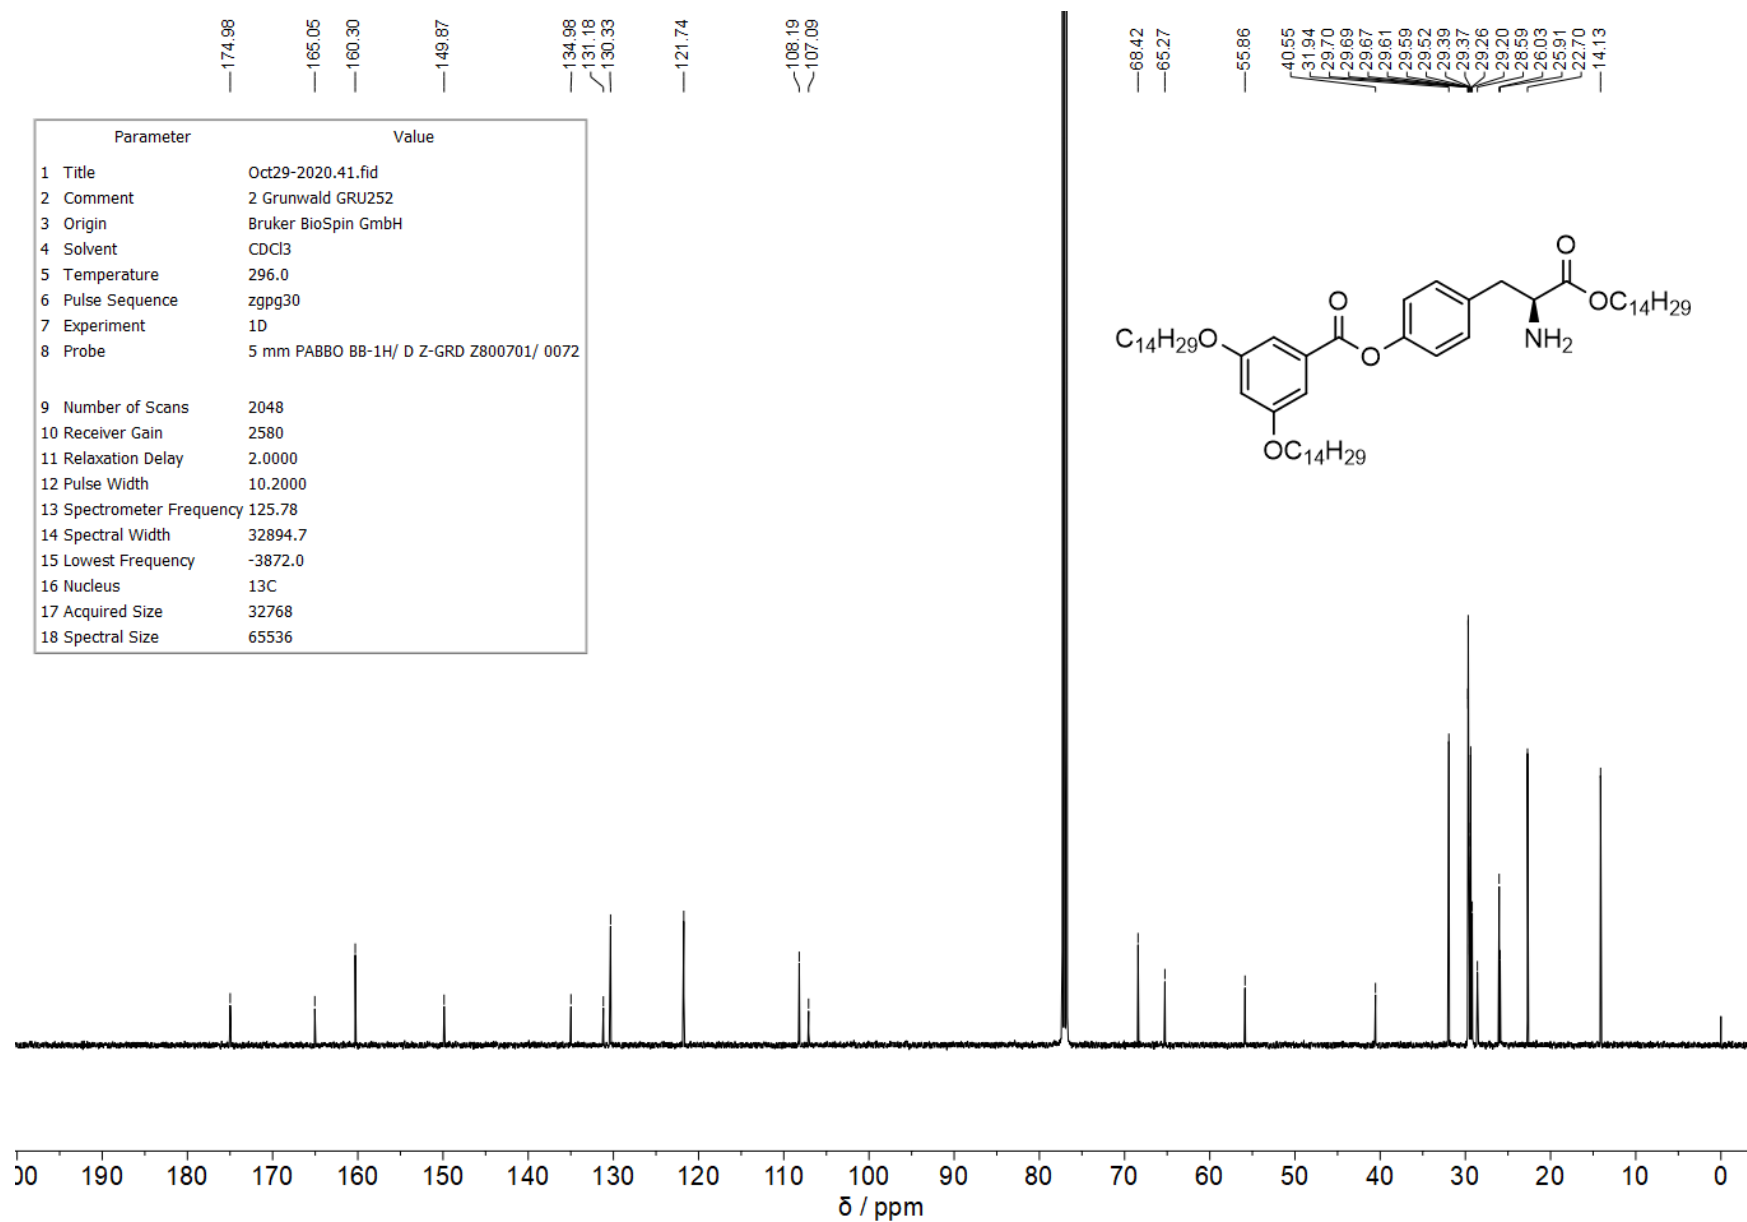

3,4,5-C<sub>10</sub>TyrC<sub>10</sub>NH<sub>2</sub>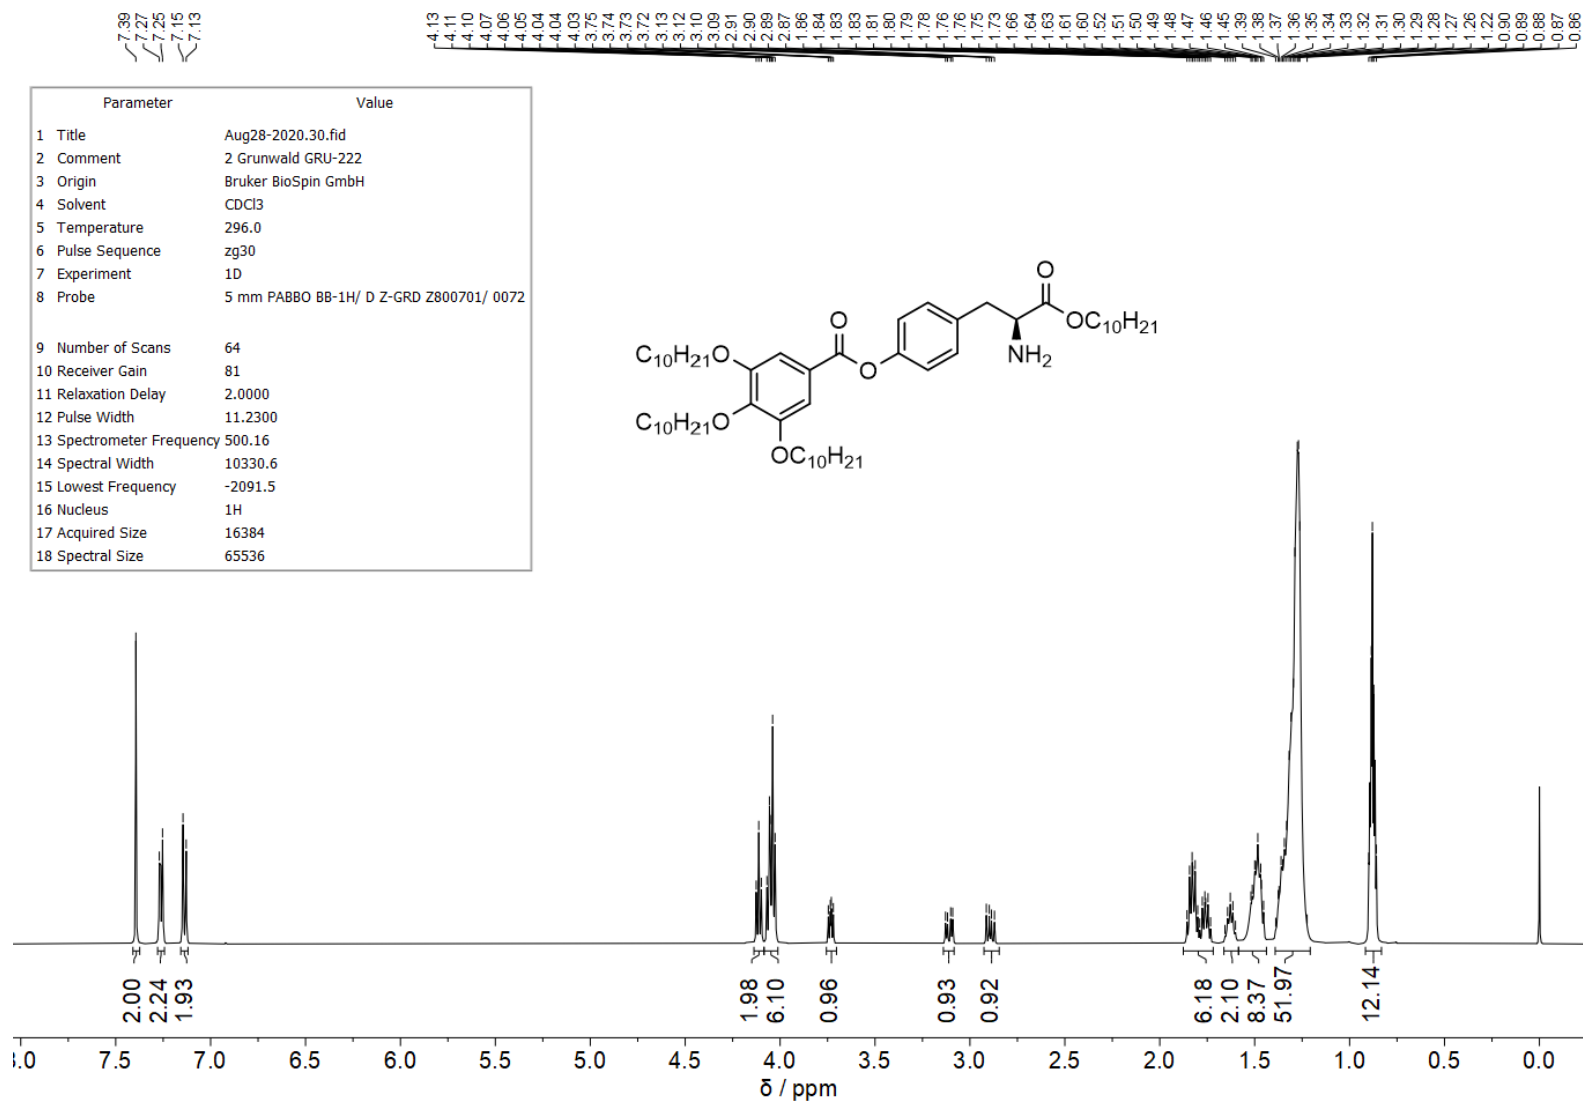

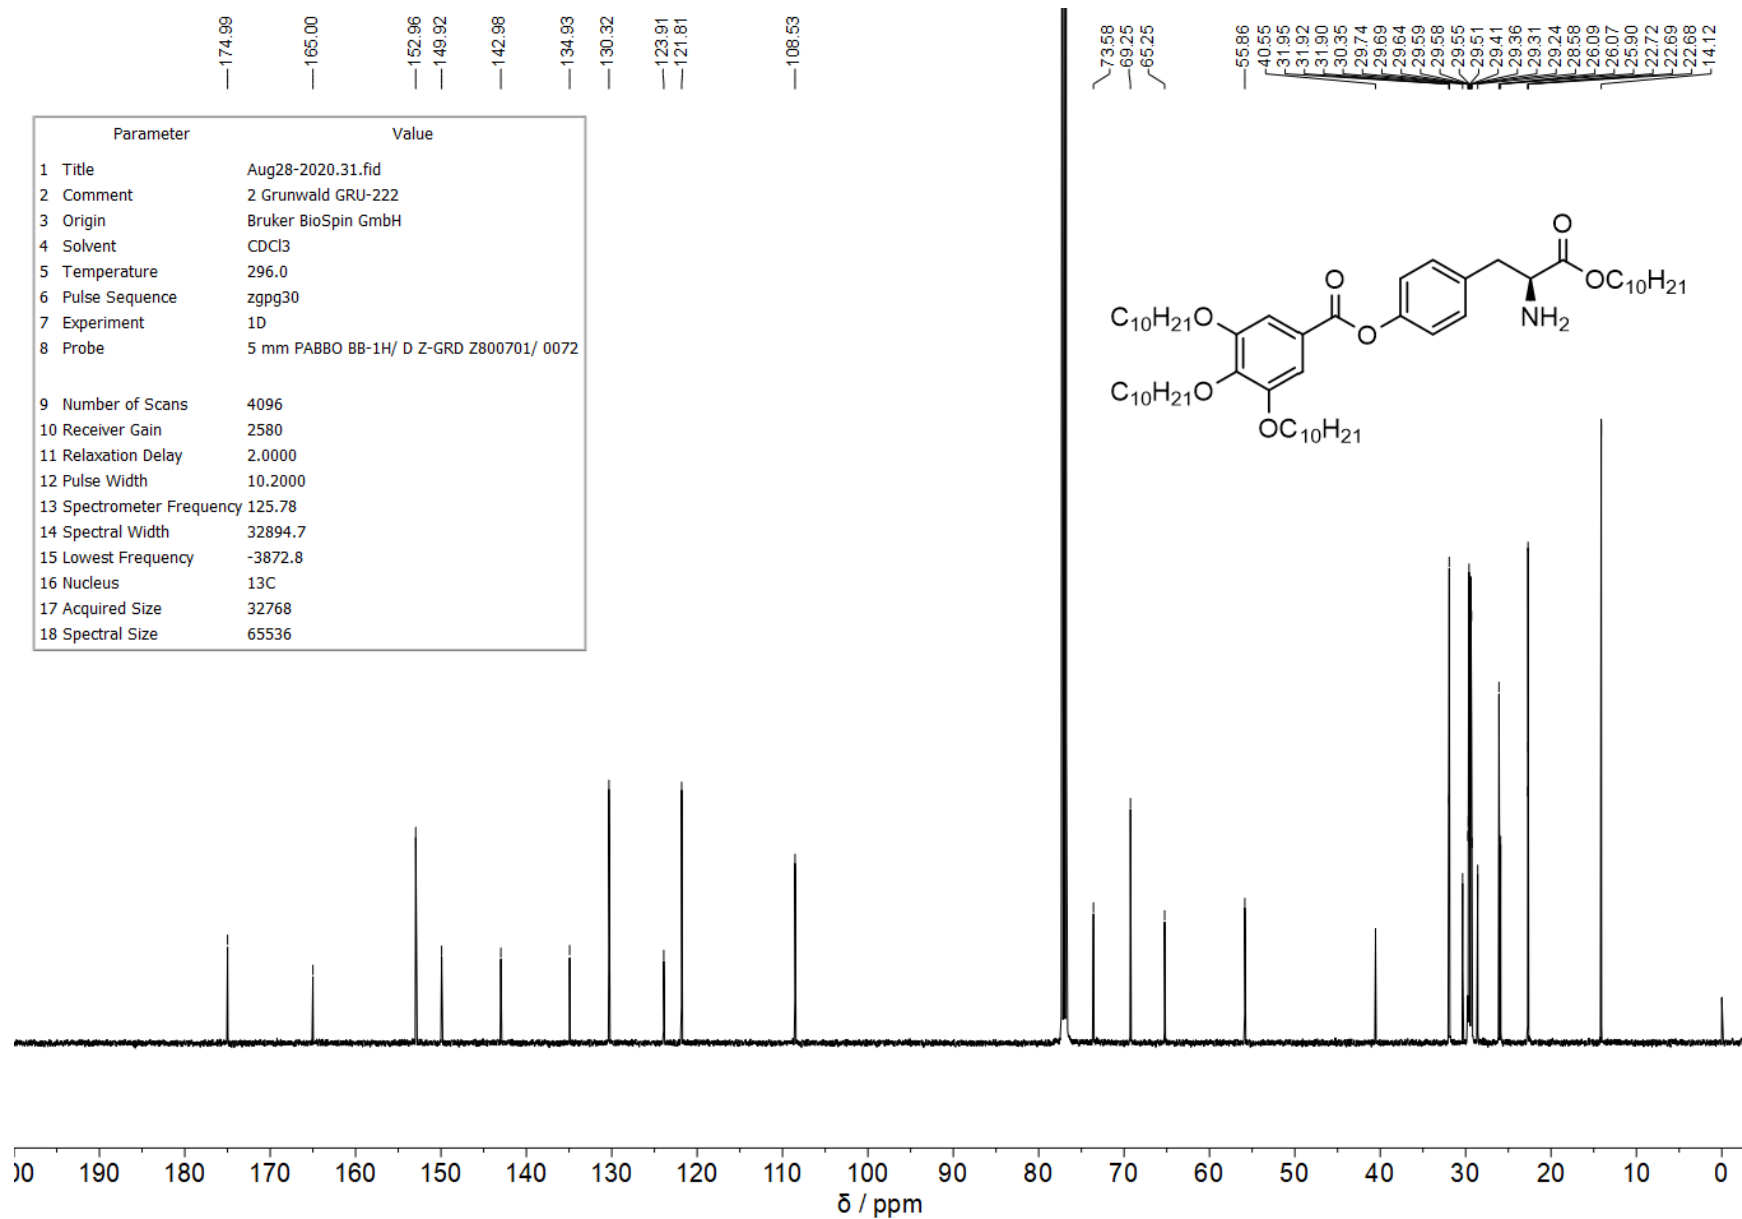

3,4,5-C<sub>12</sub>TyrC<sub>10</sub>NH<sub>2</sub>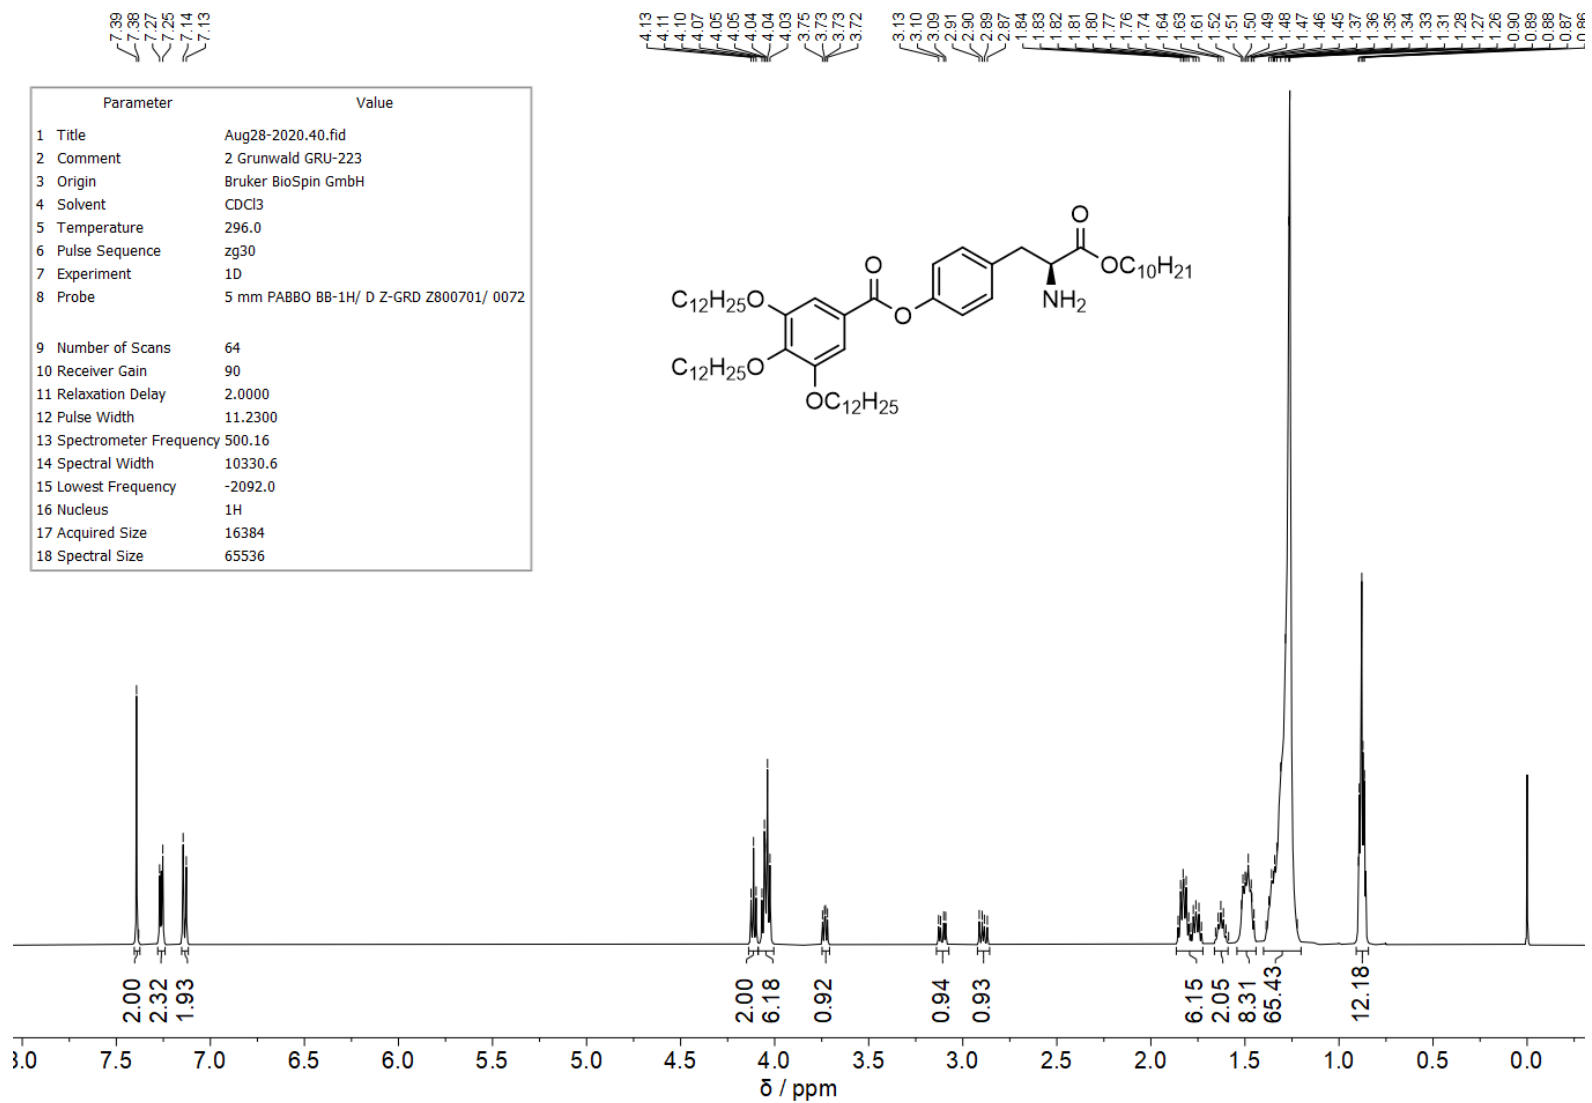

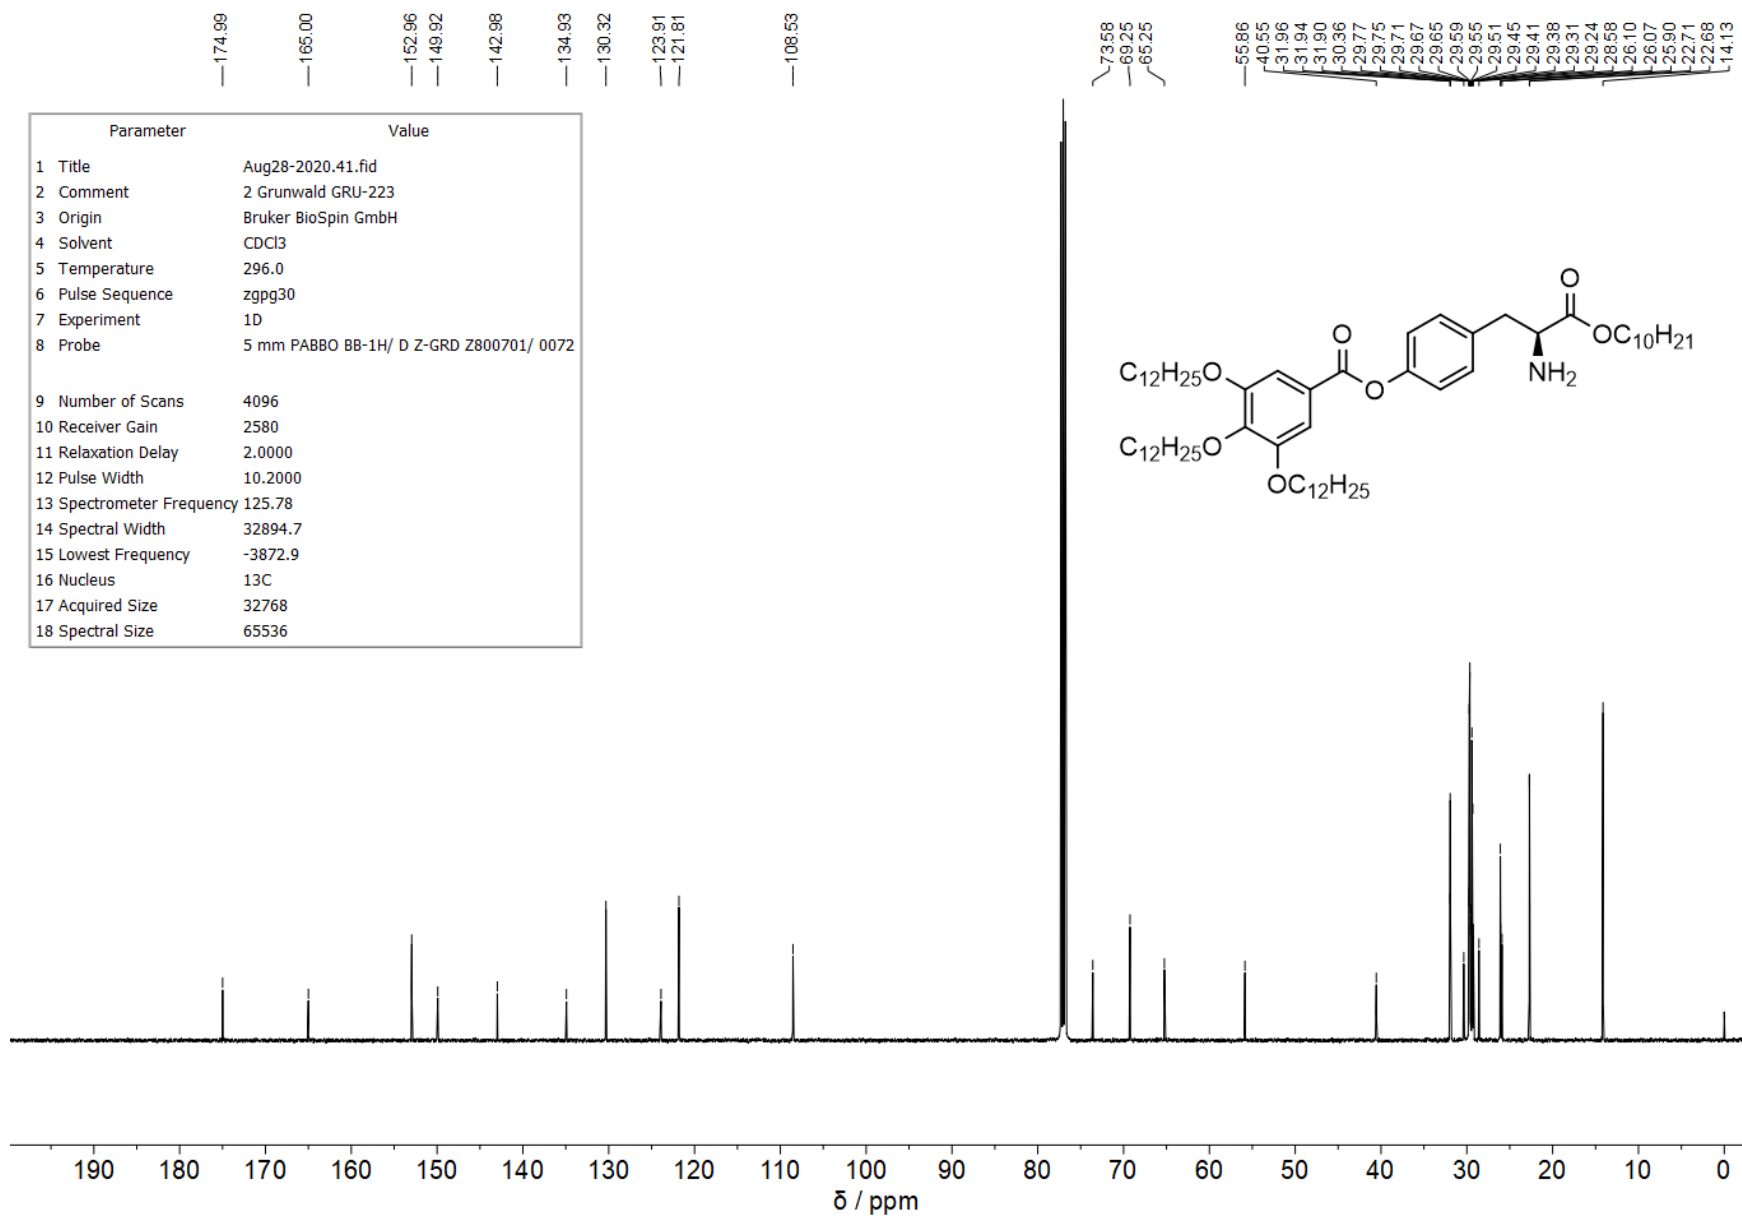

3,4,5-C<sub>14</sub>TyrC<sub>10</sub>NH<sub>2</sub>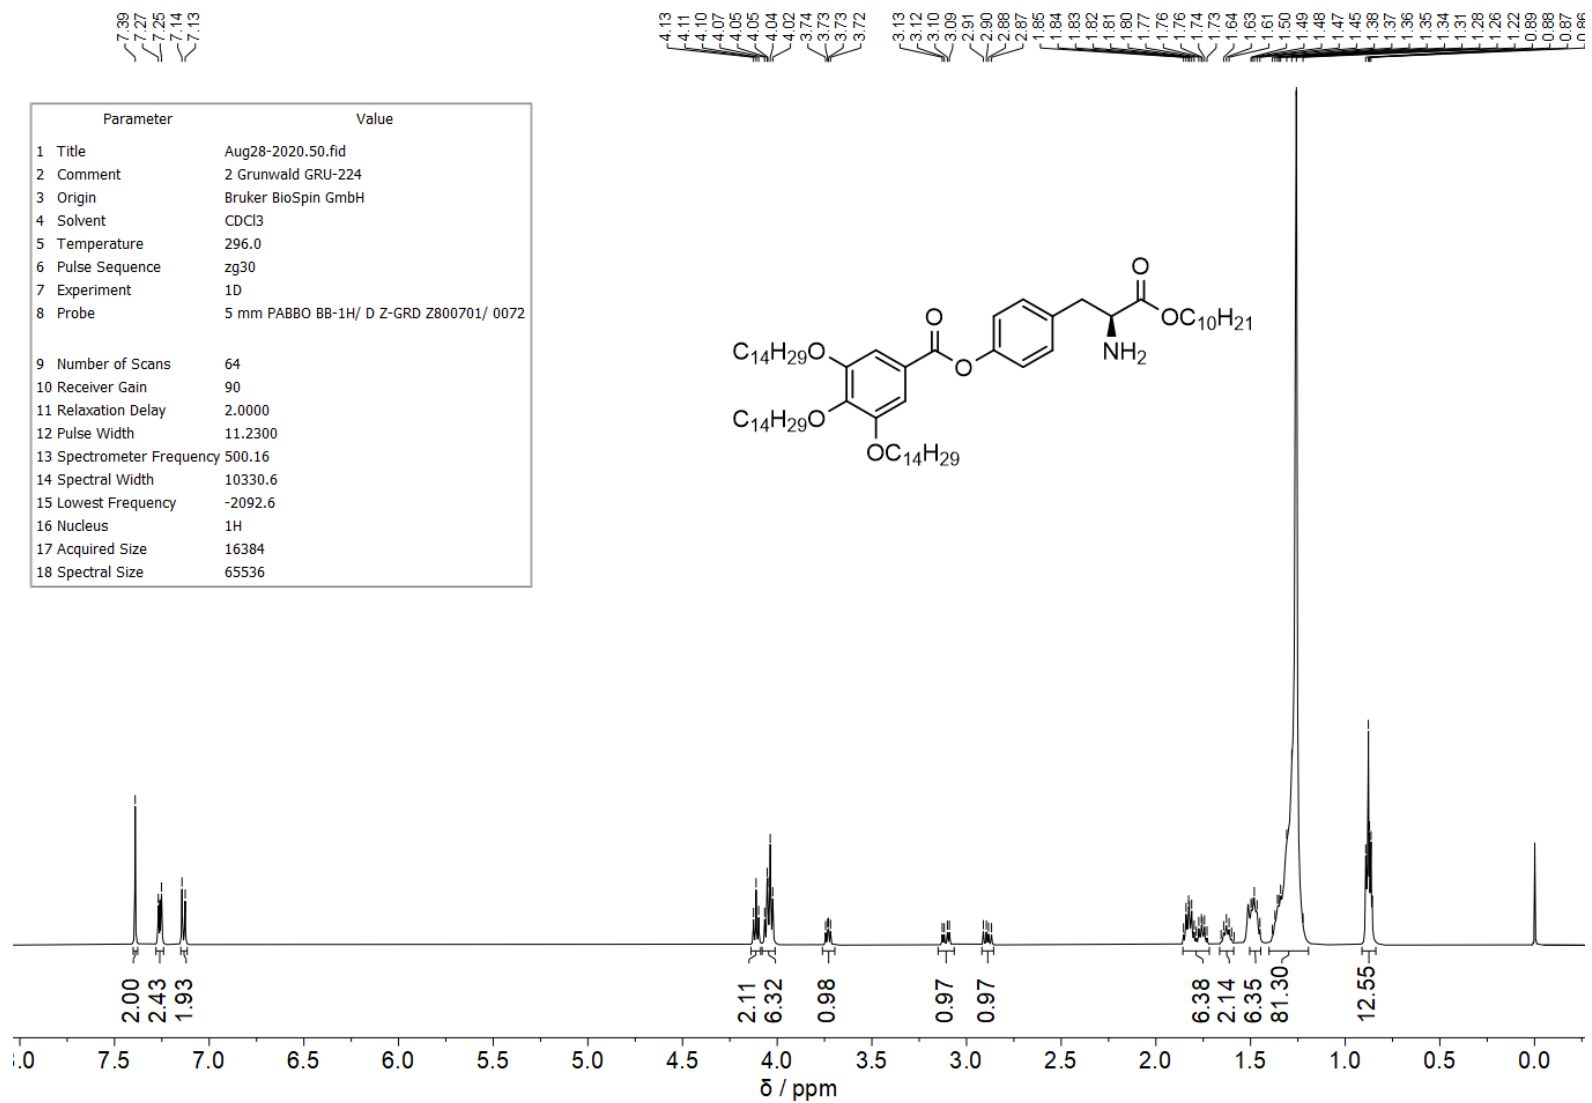



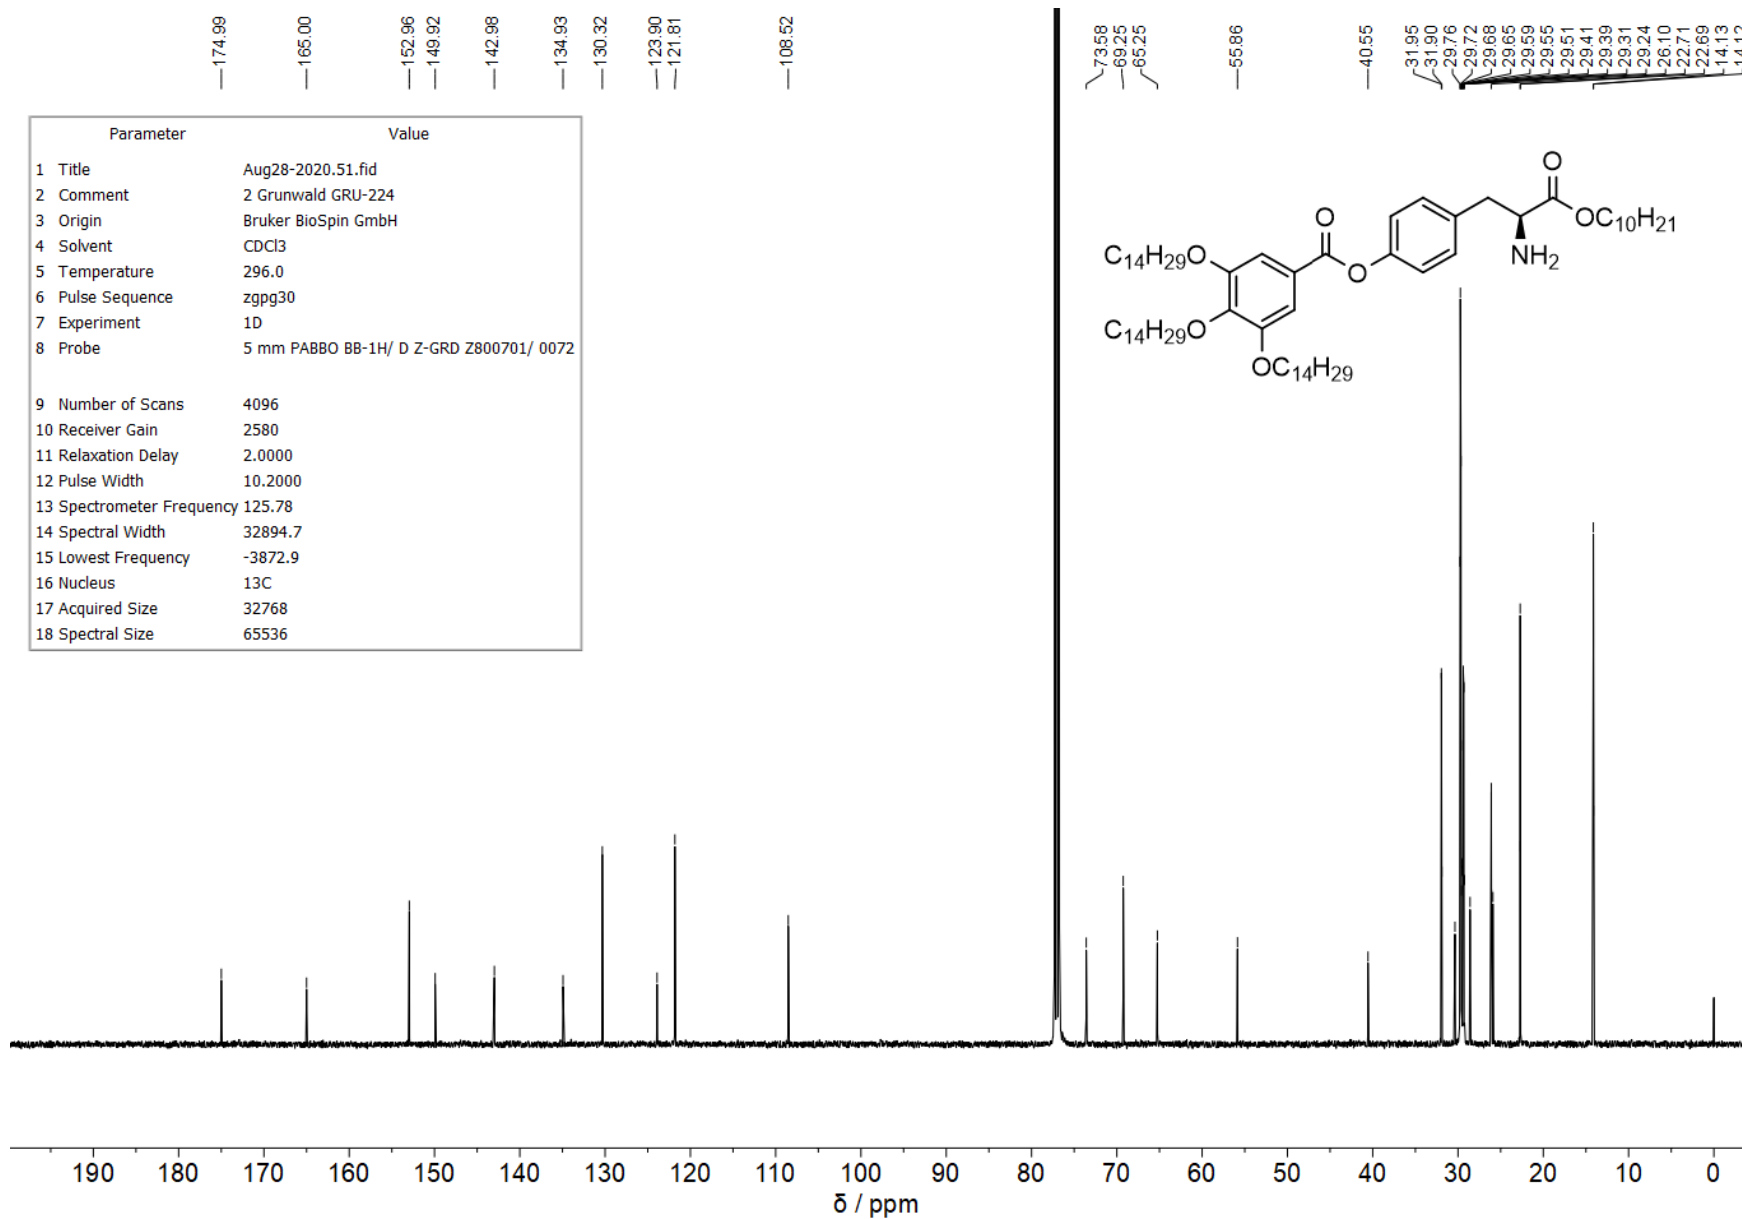

3,4,5-C<sub>10</sub>TyrC<sub>12</sub>NH<sub>2</sub>

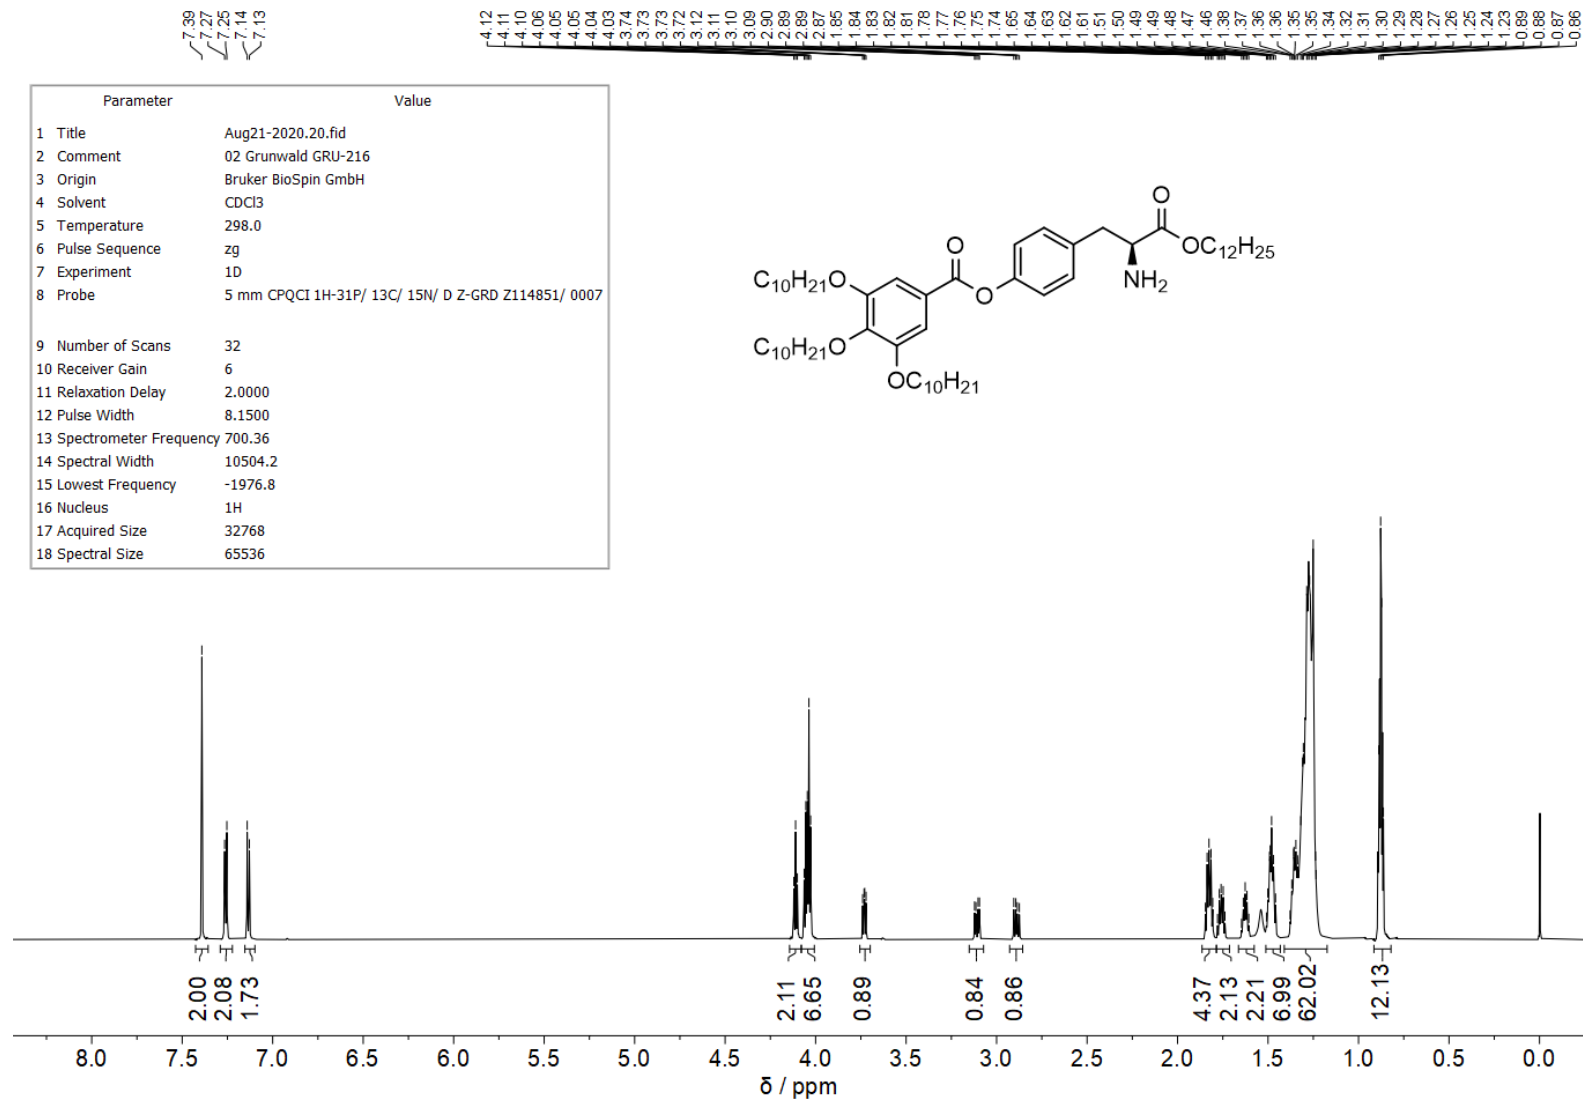

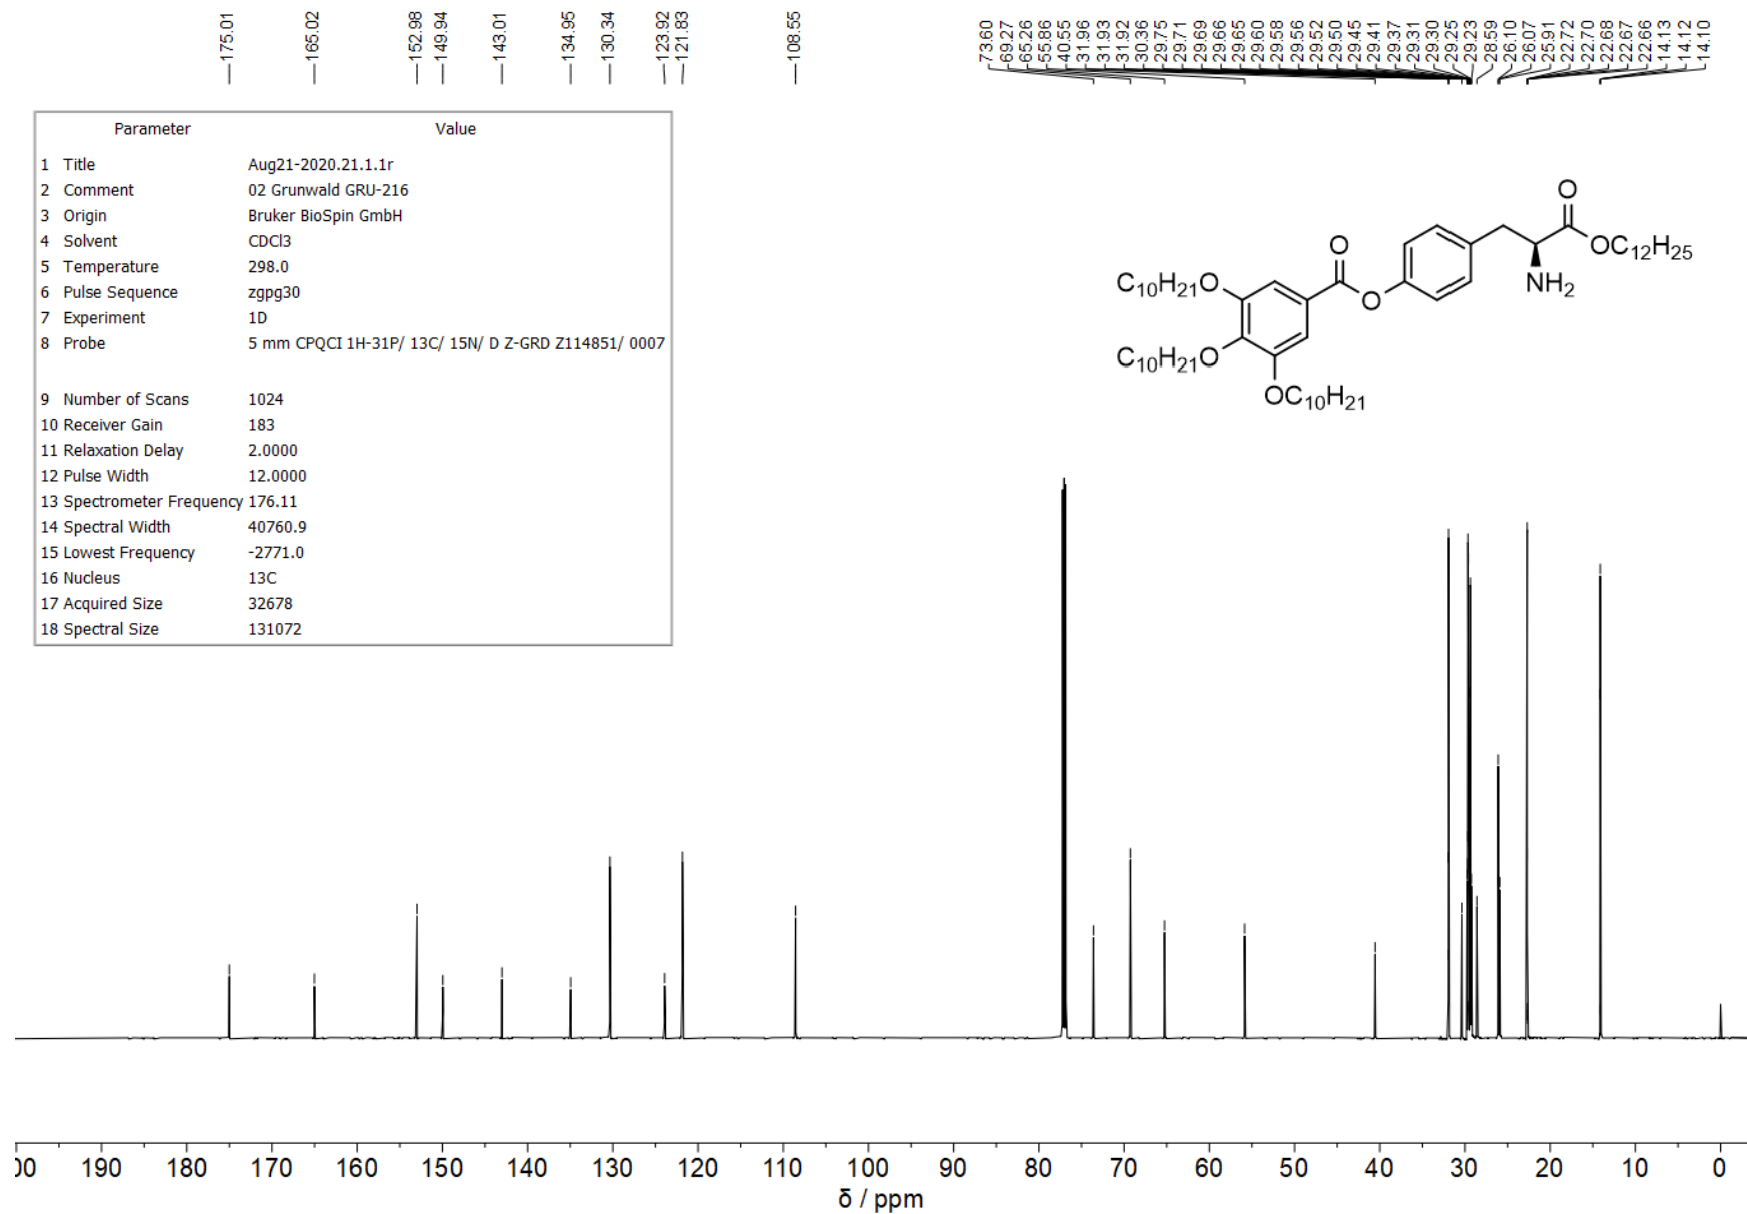

3,4,5-C<sub>12</sub>TyrC<sub>12</sub>NH<sub>2</sub>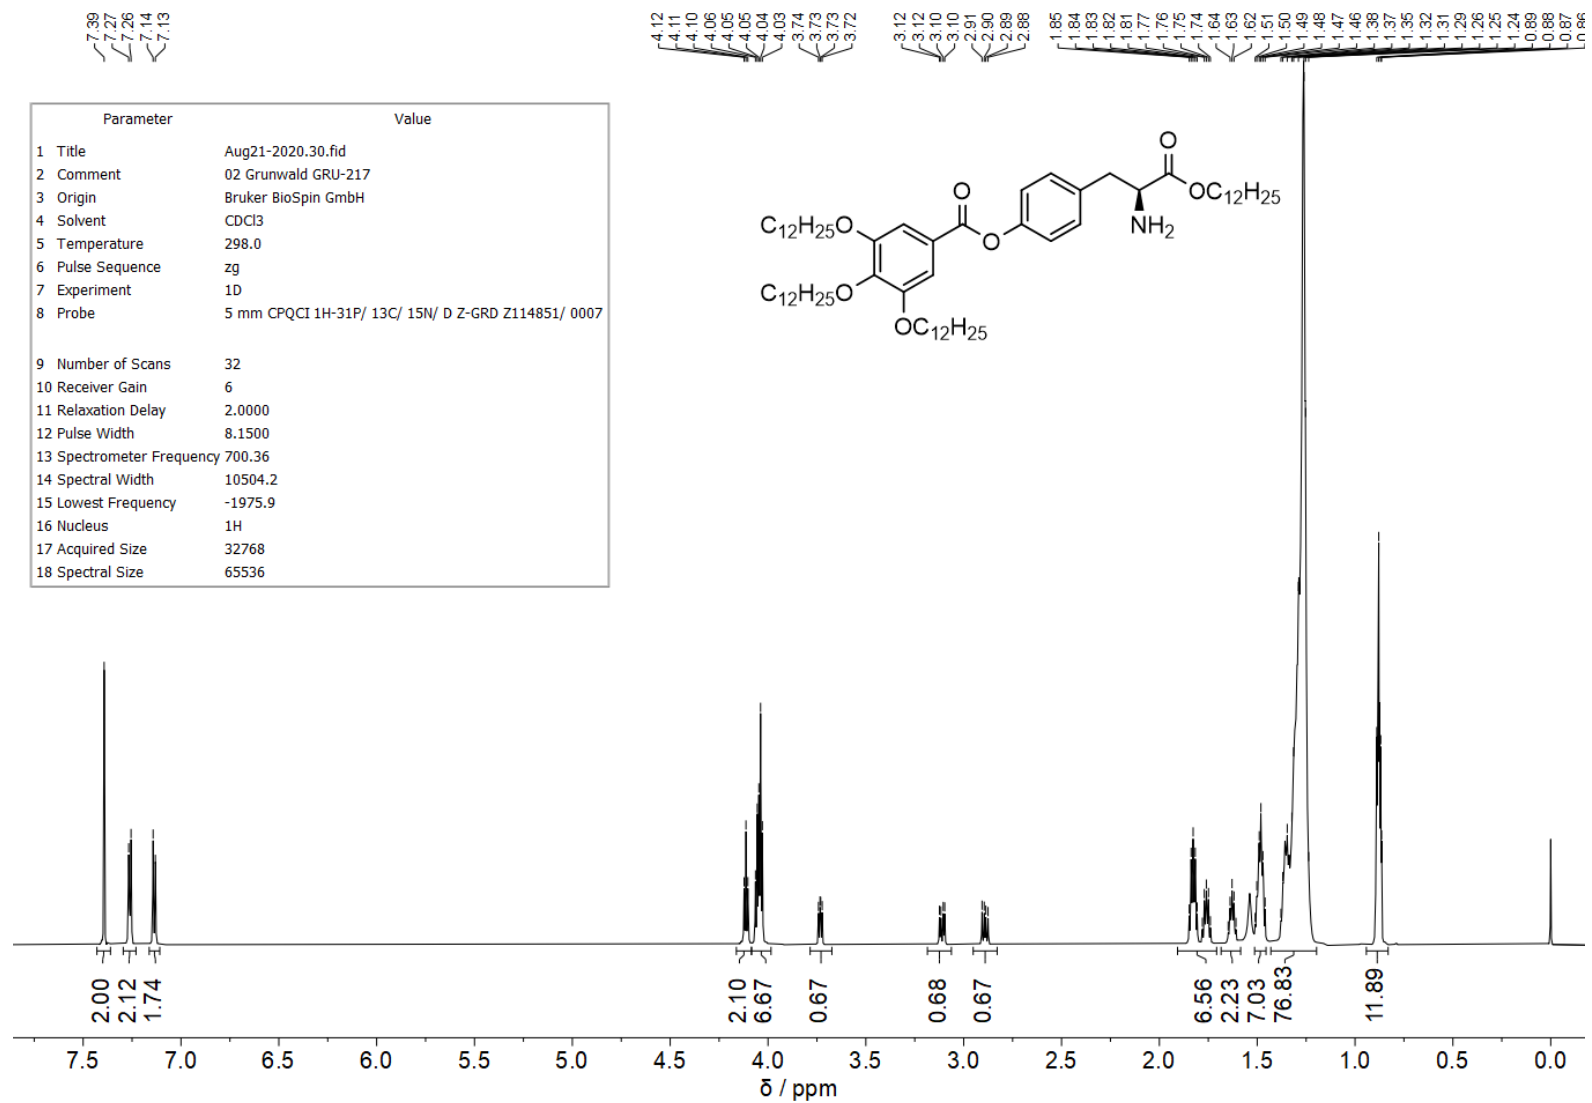

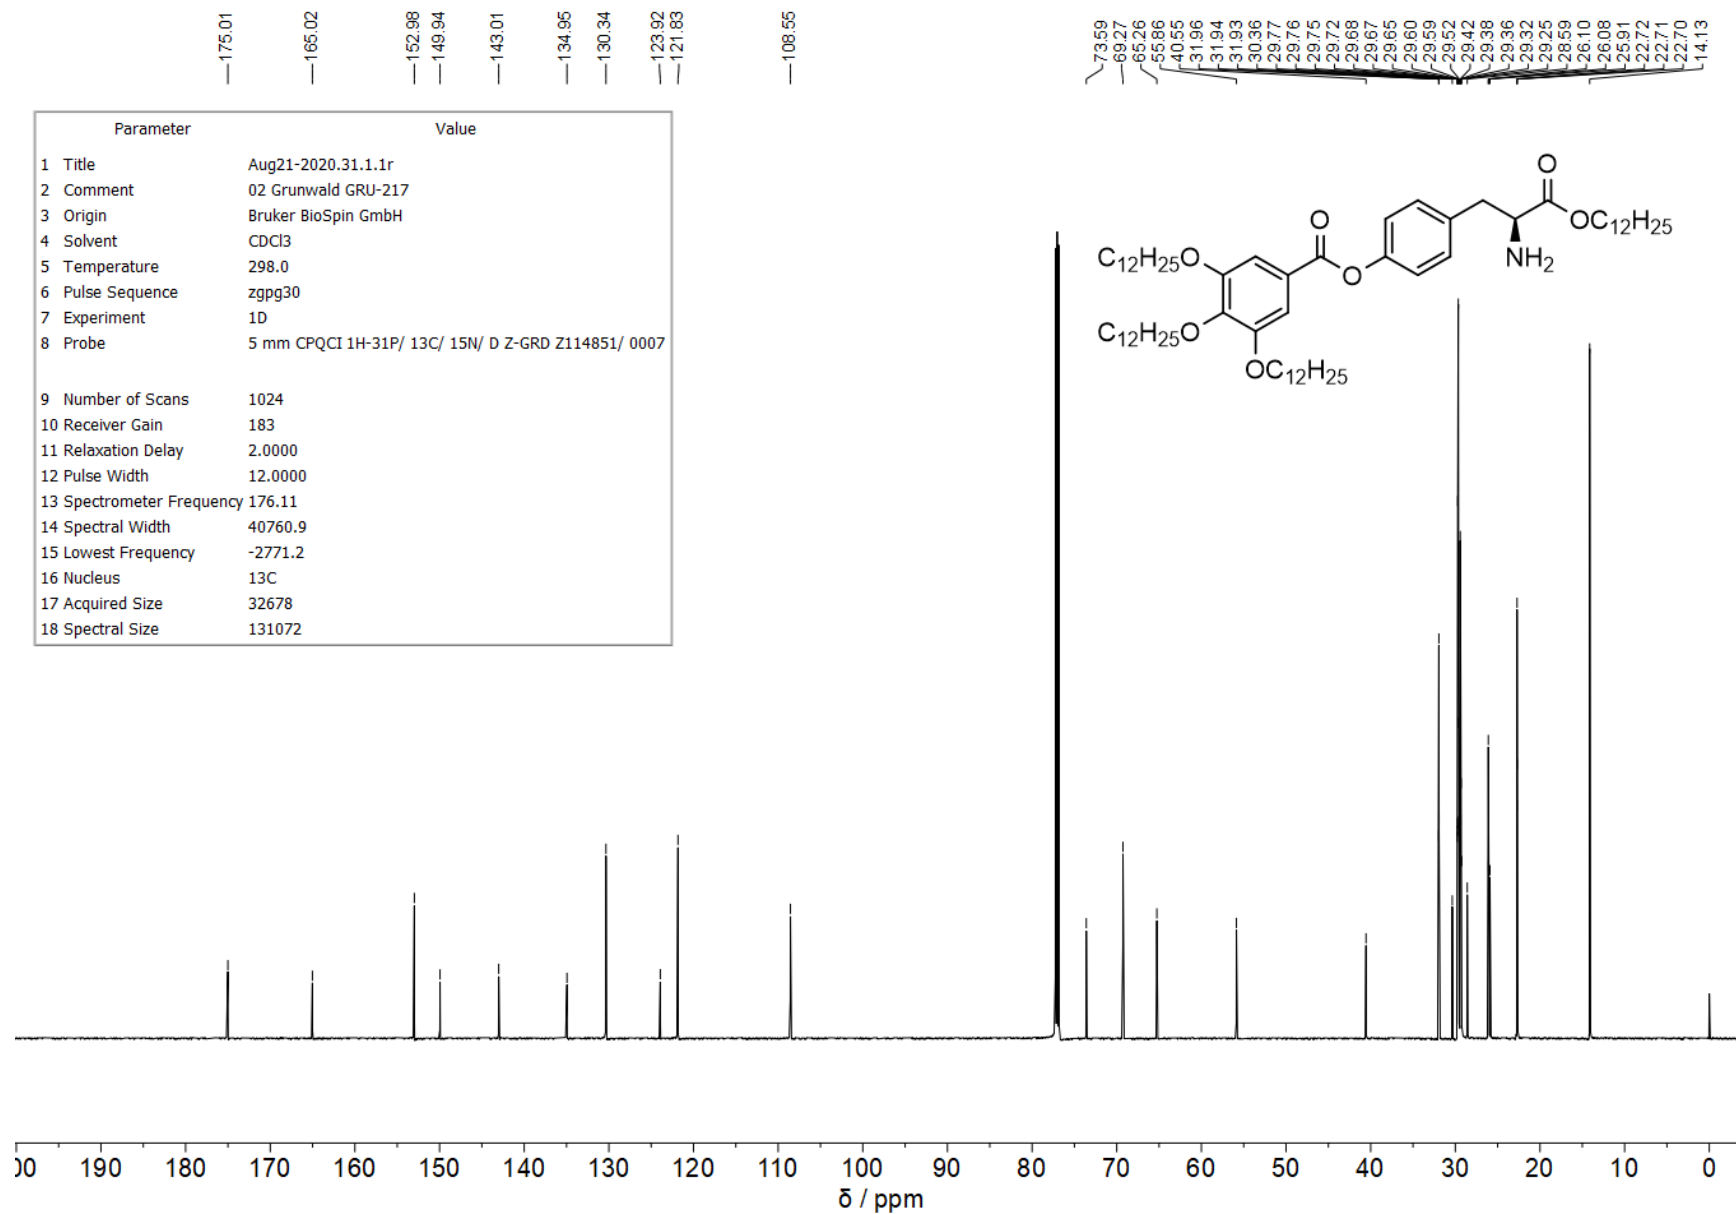

3,4,5-C<sub>14</sub>TyrC<sub>12</sub>NH<sub>2</sub>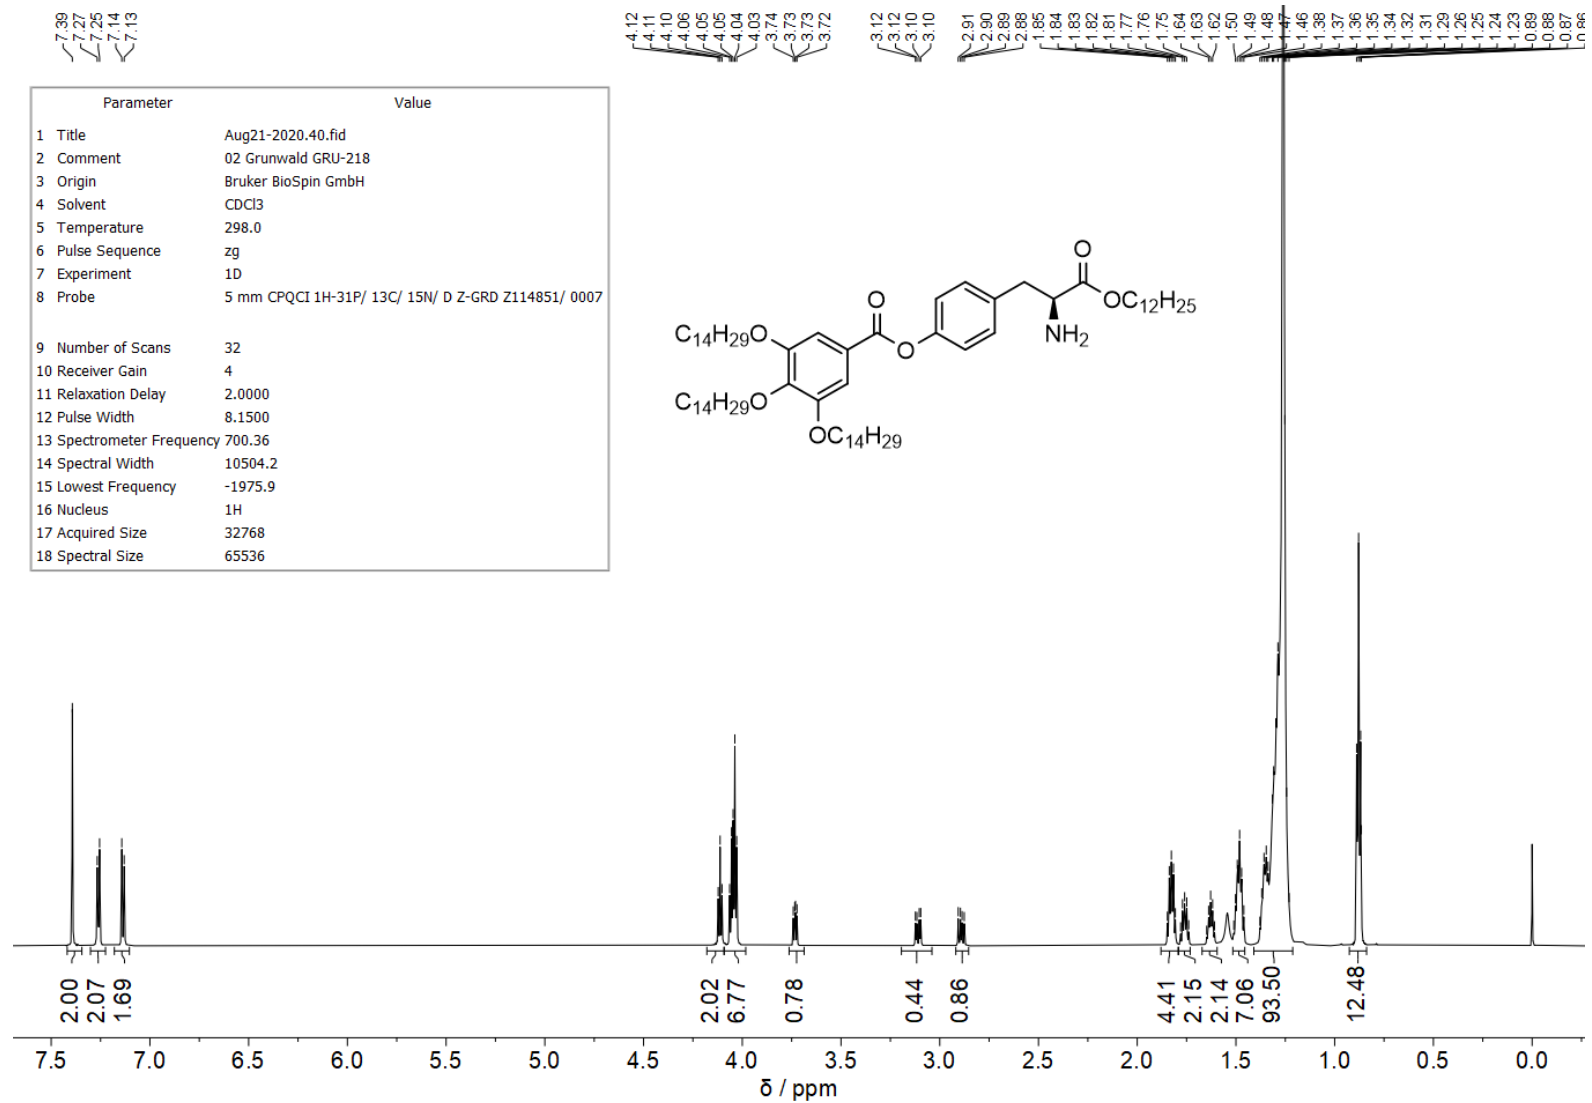

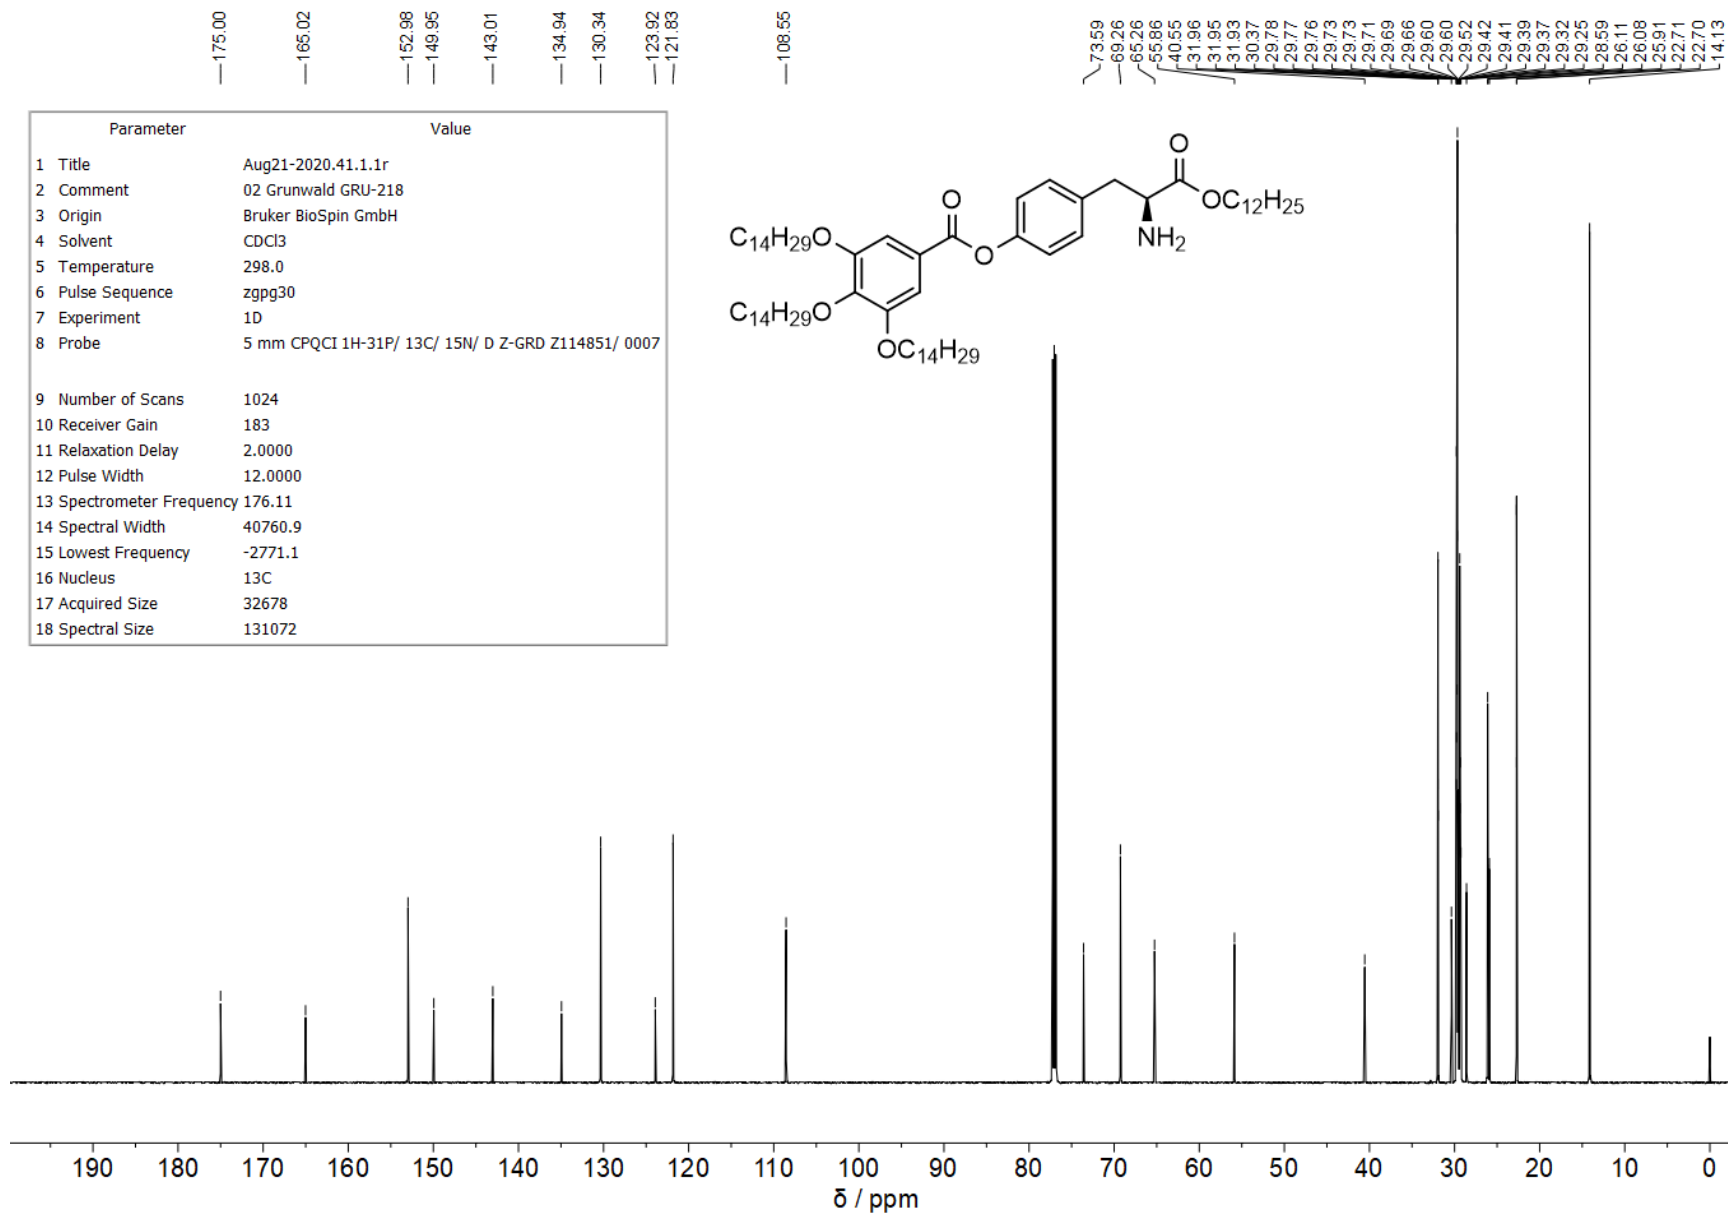

3,4,5-C<sub>10</sub>TyrC<sub>14</sub>NH<sub>2</sub>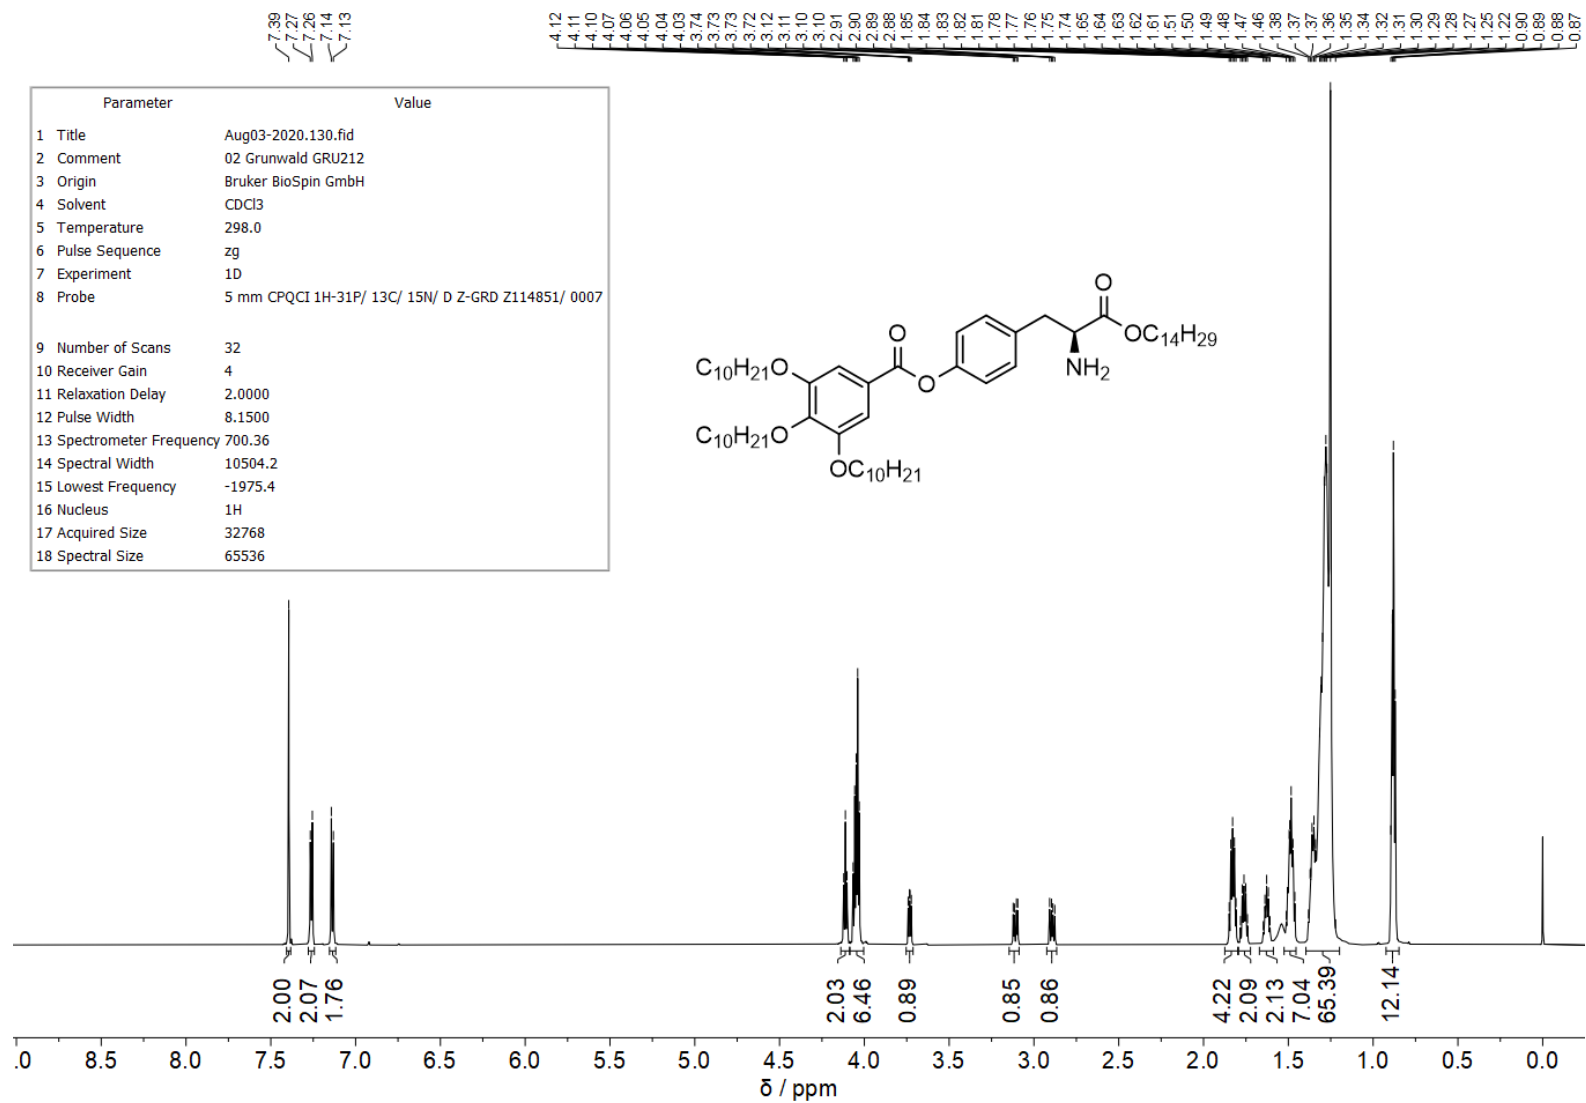



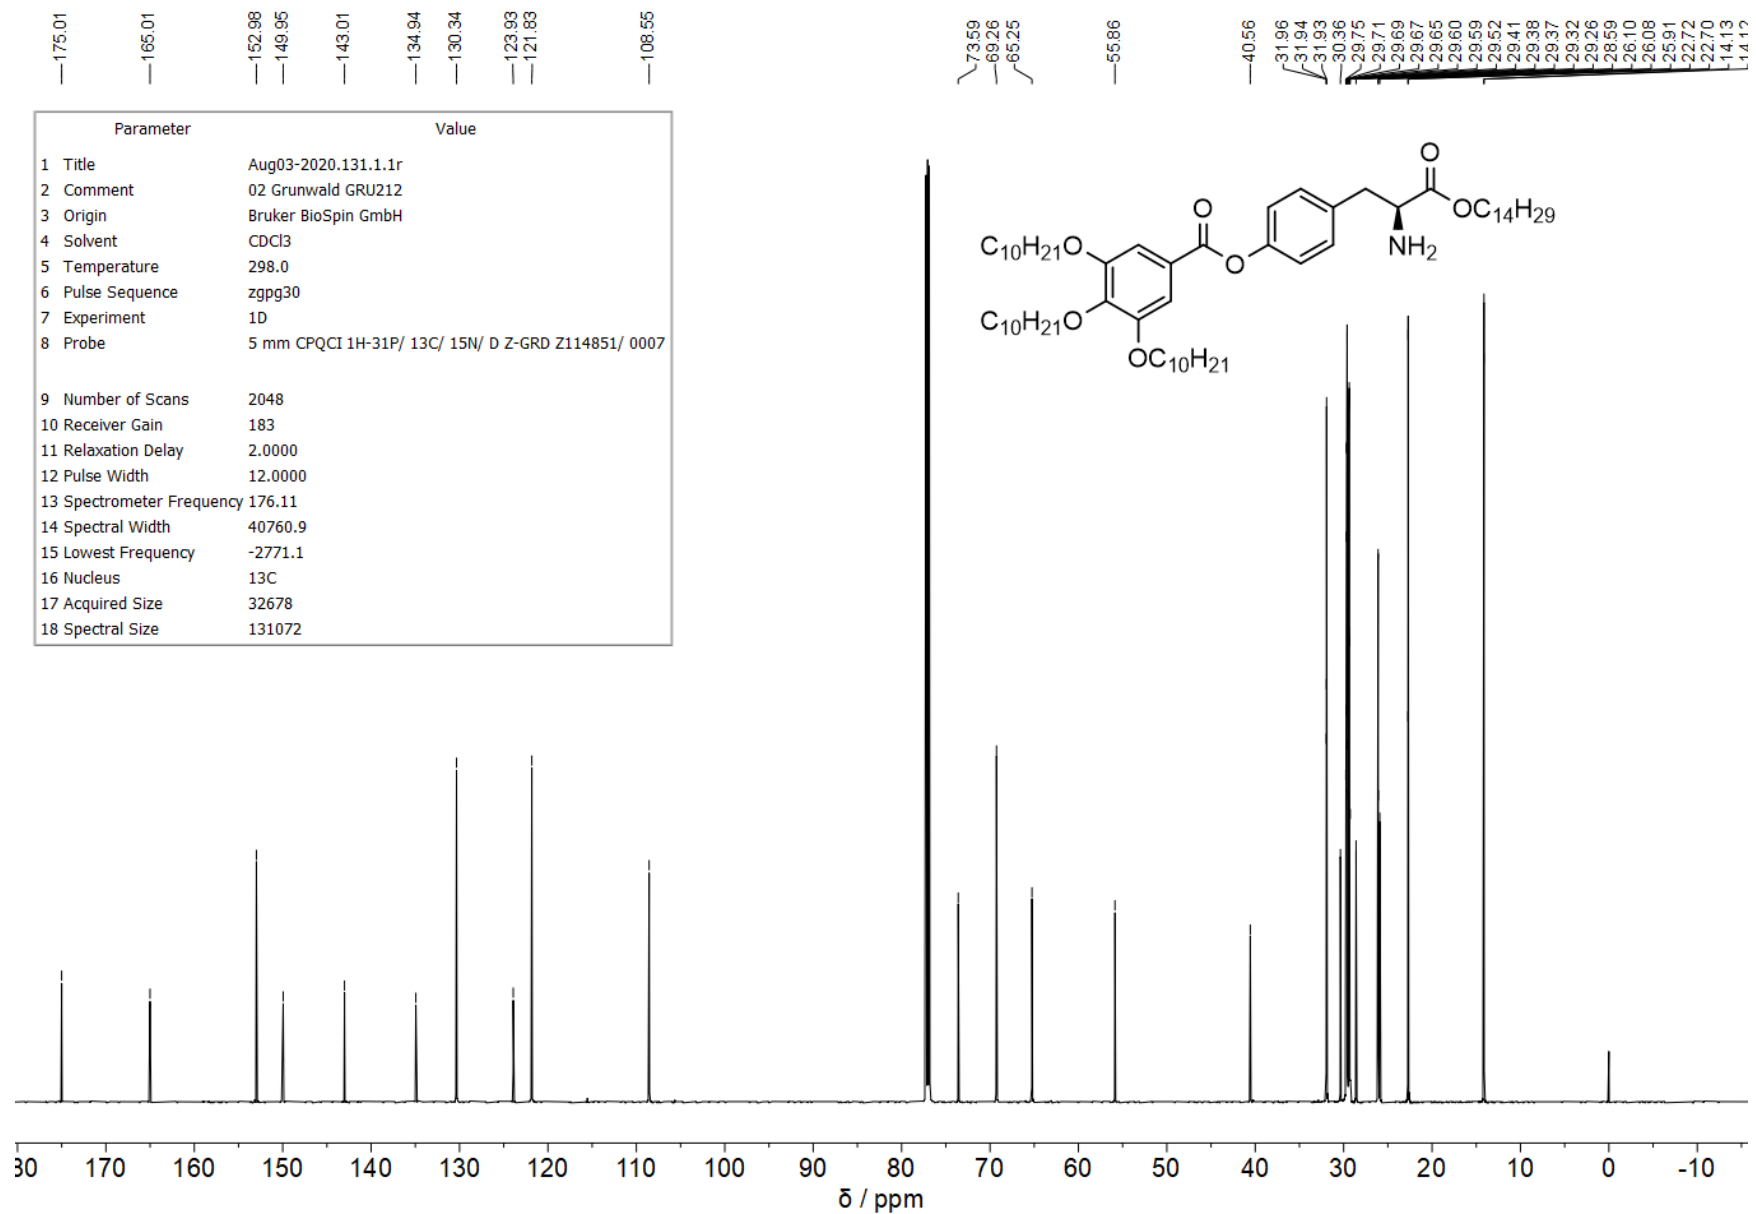

3,4,5-C<sub>12</sub>TyrC<sub>14</sub>NH<sub>2</sub>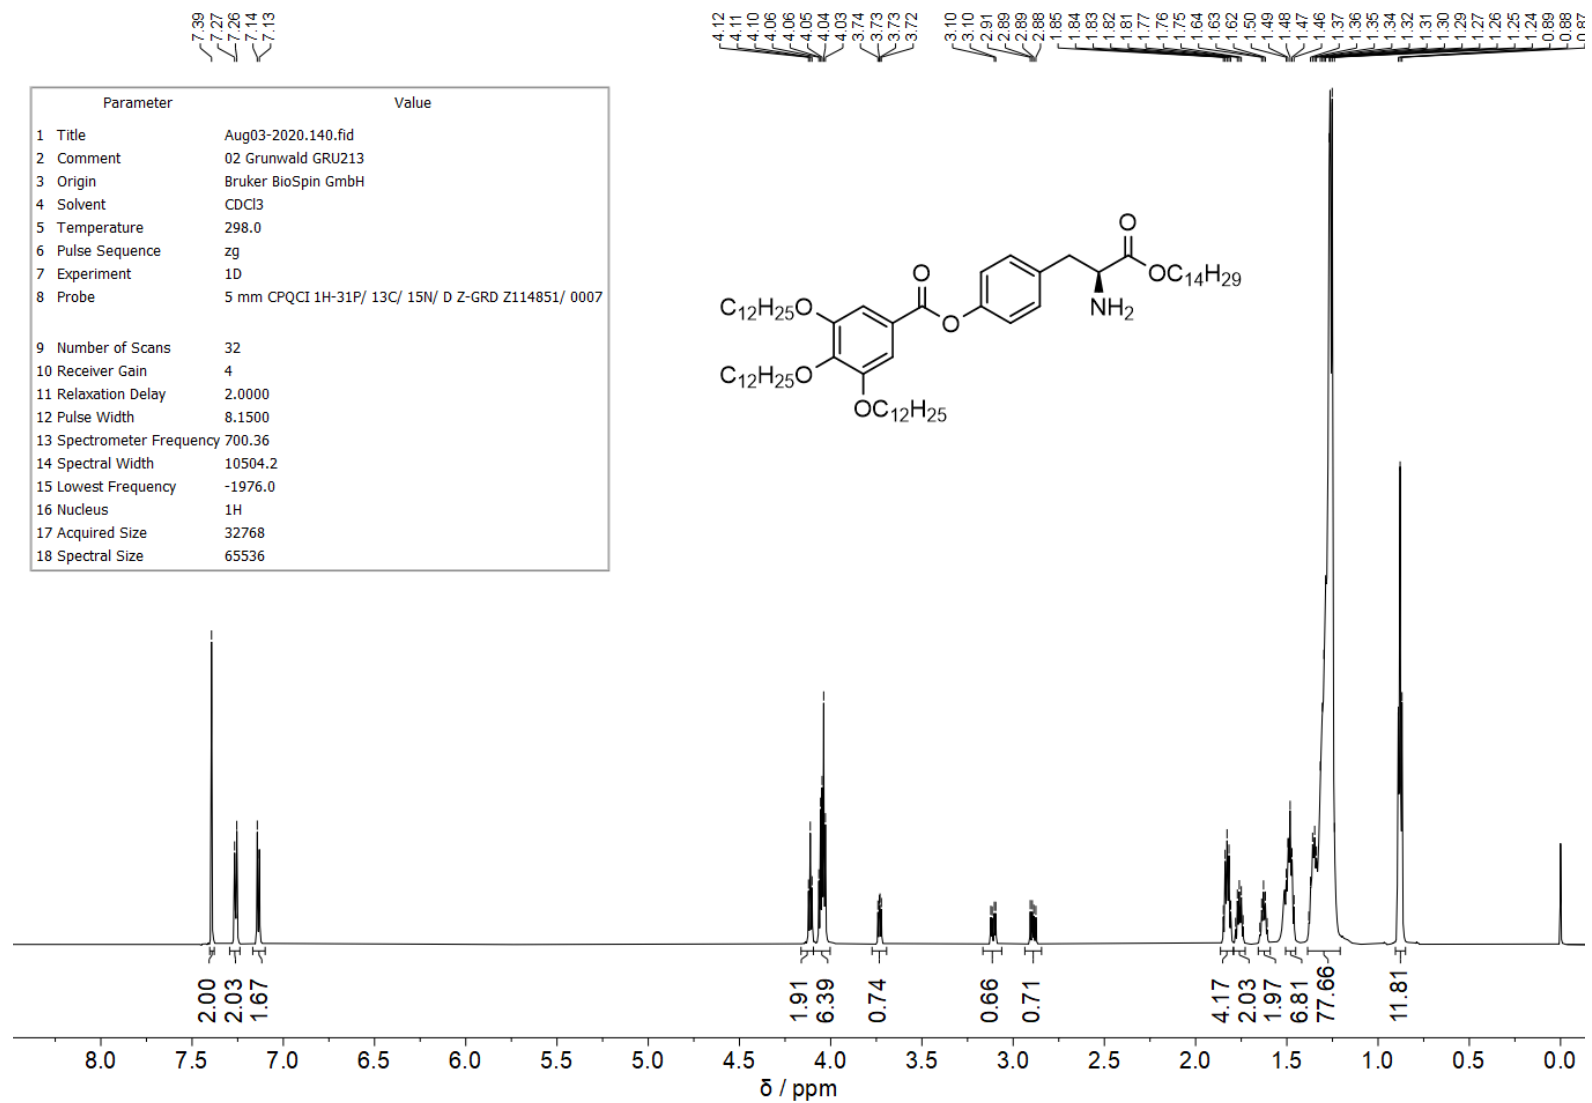

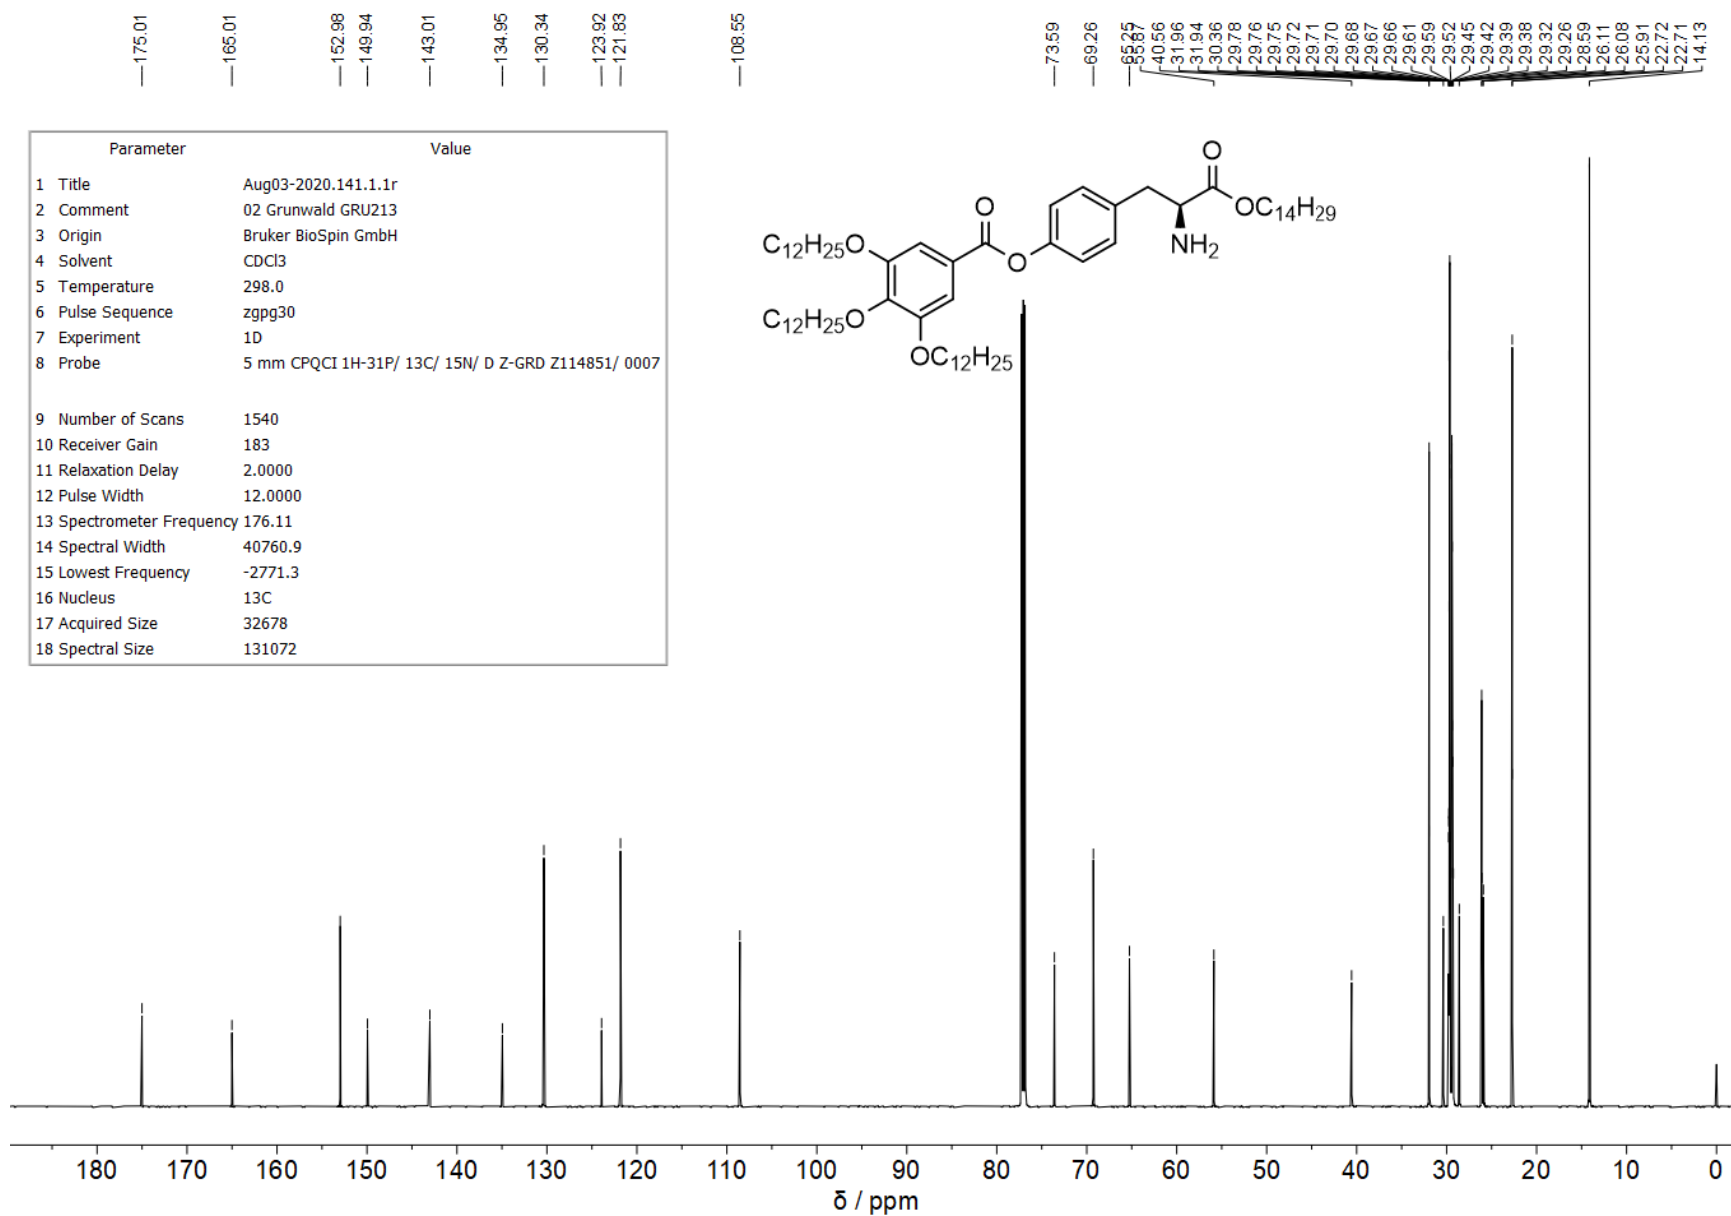

| Parameter                 | Value                                              |
|---------------------------|----------------------------------------------------|
| 1 Title                   | Aug03-2020.141.1.1r                                |
| 2 Comment                 | 02 Grunwald GRU213                                 |
| 3 Origin                  | Bruker BioSpin GmbH                                |
| 4 Solvent                 | CDCl3                                              |
| 5 Temperature             | 298.0                                              |
| 6 Pulse Sequence          | zgpg30                                             |
| 7 Experiment              | 1D                                                 |
| 8 Probe                   | 5 mm CPQCI 1H-31P/ 13C/ 15N/ D Z-GRD Z114851/ 0007 |
| 9 Number of Scans         | 1540                                               |
| 10 Receiver Gain          | 183                                                |
| 11 Relaxation Delay       | 2.0000                                             |
| 12 Pulse Width            | 12.0000                                            |
| 13 Spectrometer Frequency | 176.11                                             |
| 14 Spectral Width         | 40760.9                                            |
| 15 Lowest Frequency       | -2771.3                                            |
| 16 Nucleus                | 13C                                                |
| 17 Acquired Size          | 32678                                              |
| 18 Spectral Size          | 131072                                             |

3,4,5-C<sub>14</sub>TyrC<sub>14</sub>NH<sub>2</sub>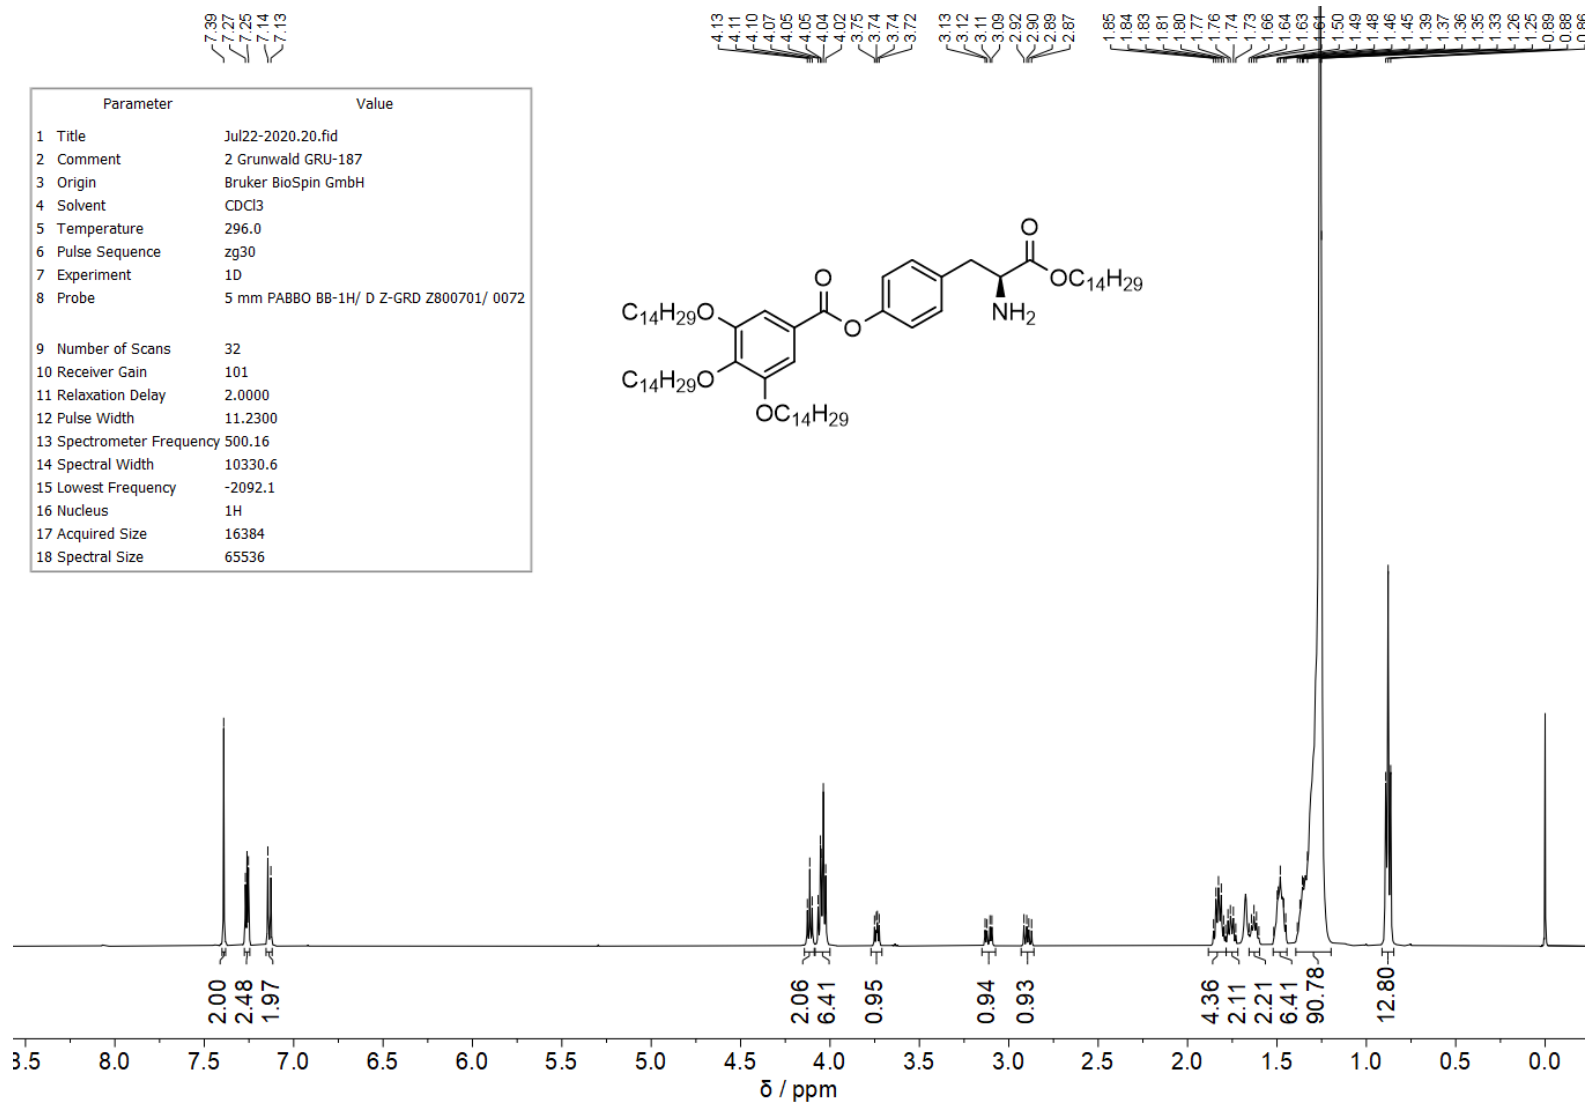

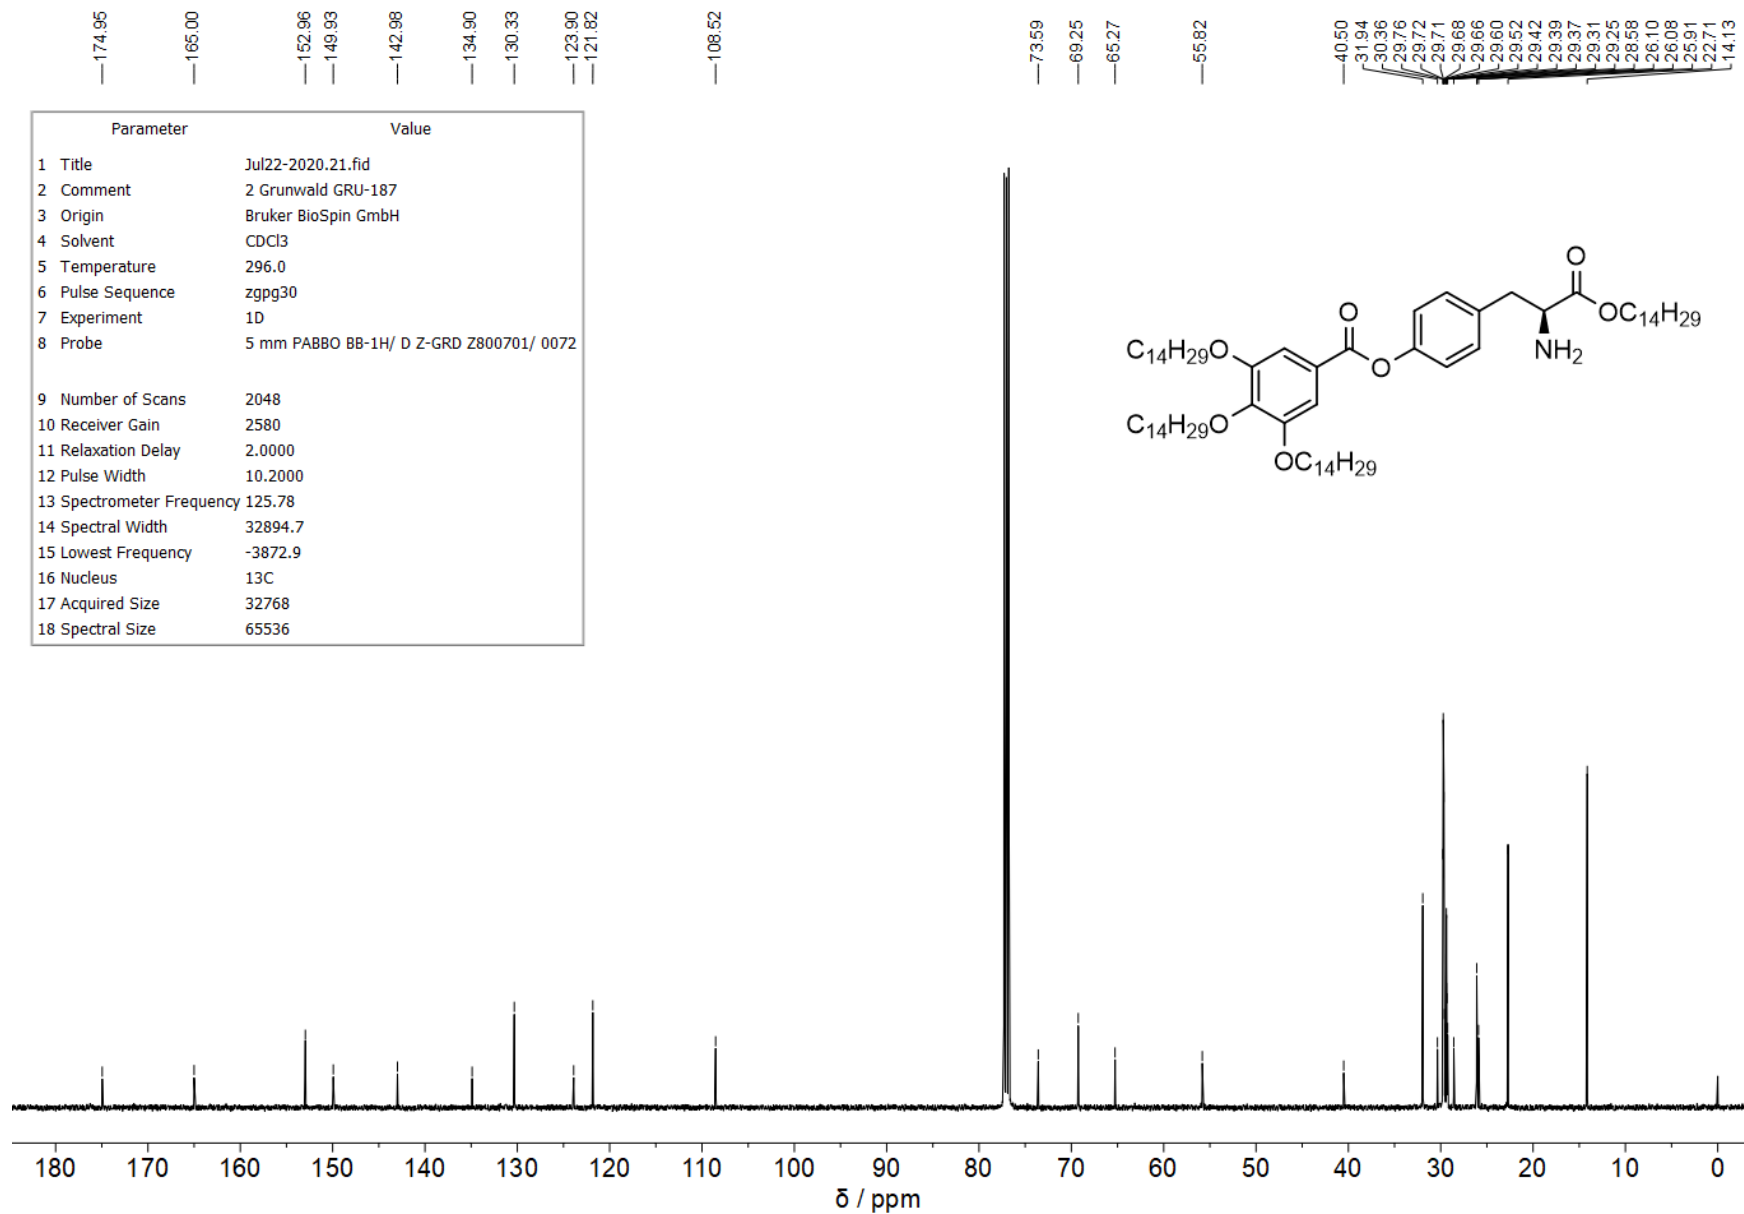

BzTyrC<sub>10</sub>Cl

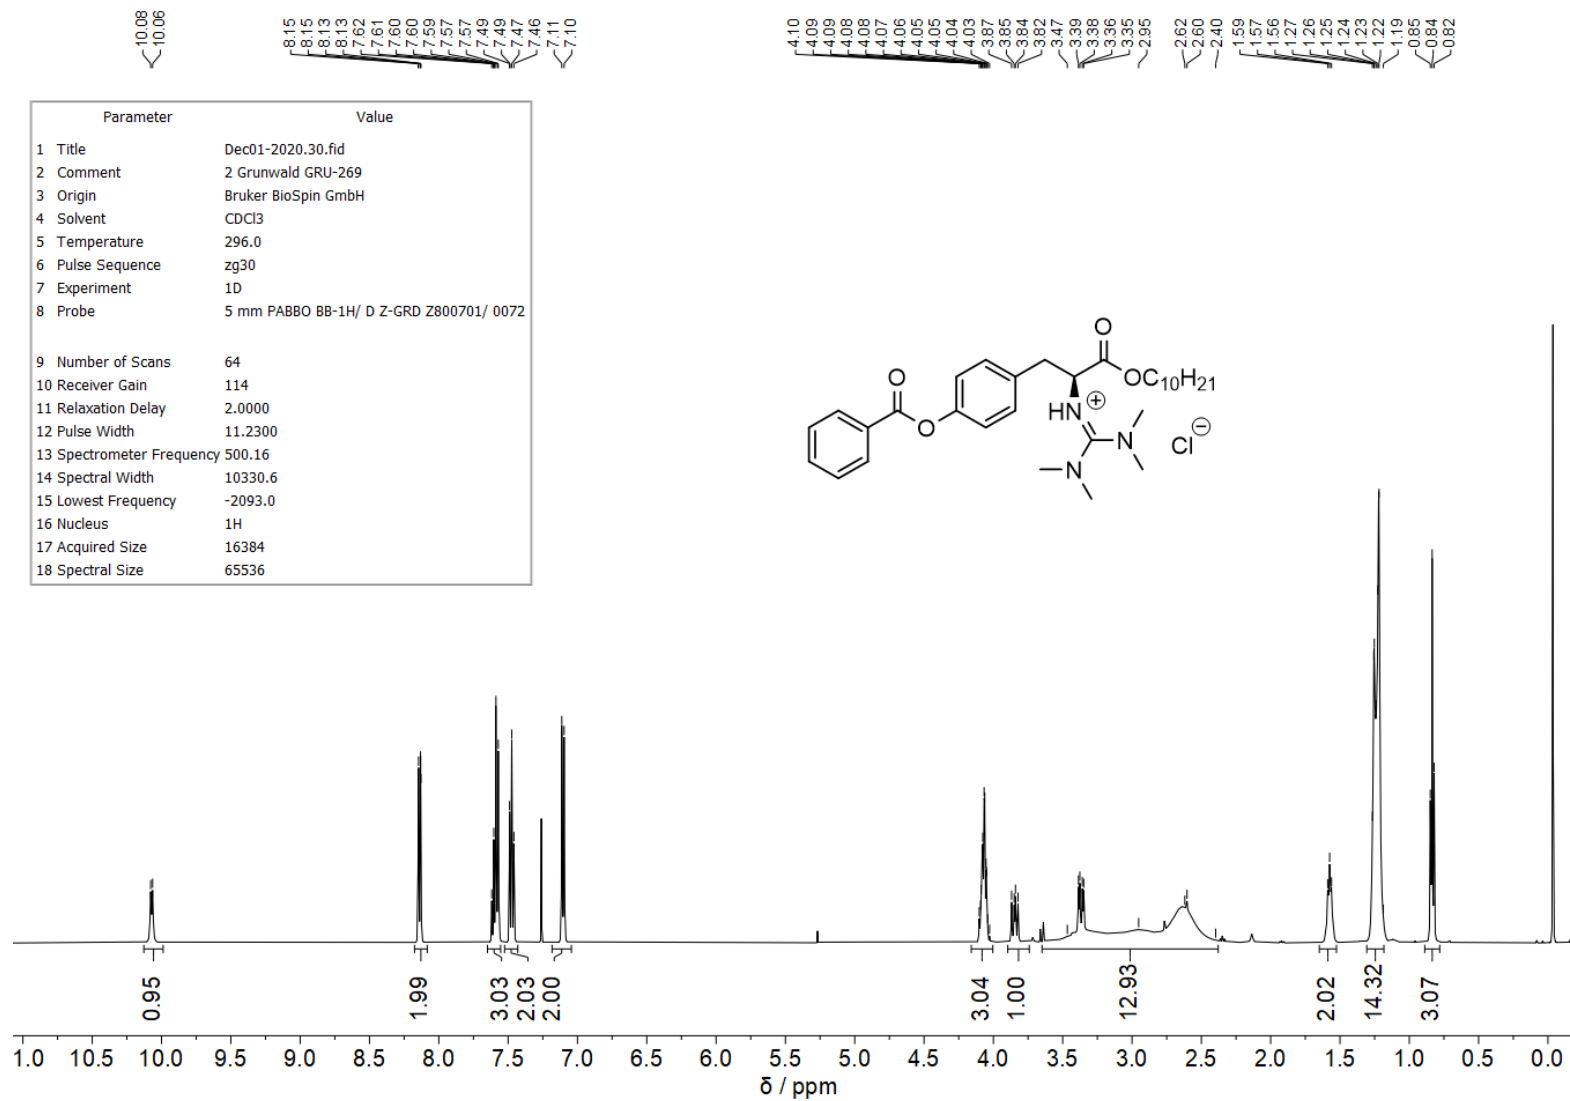

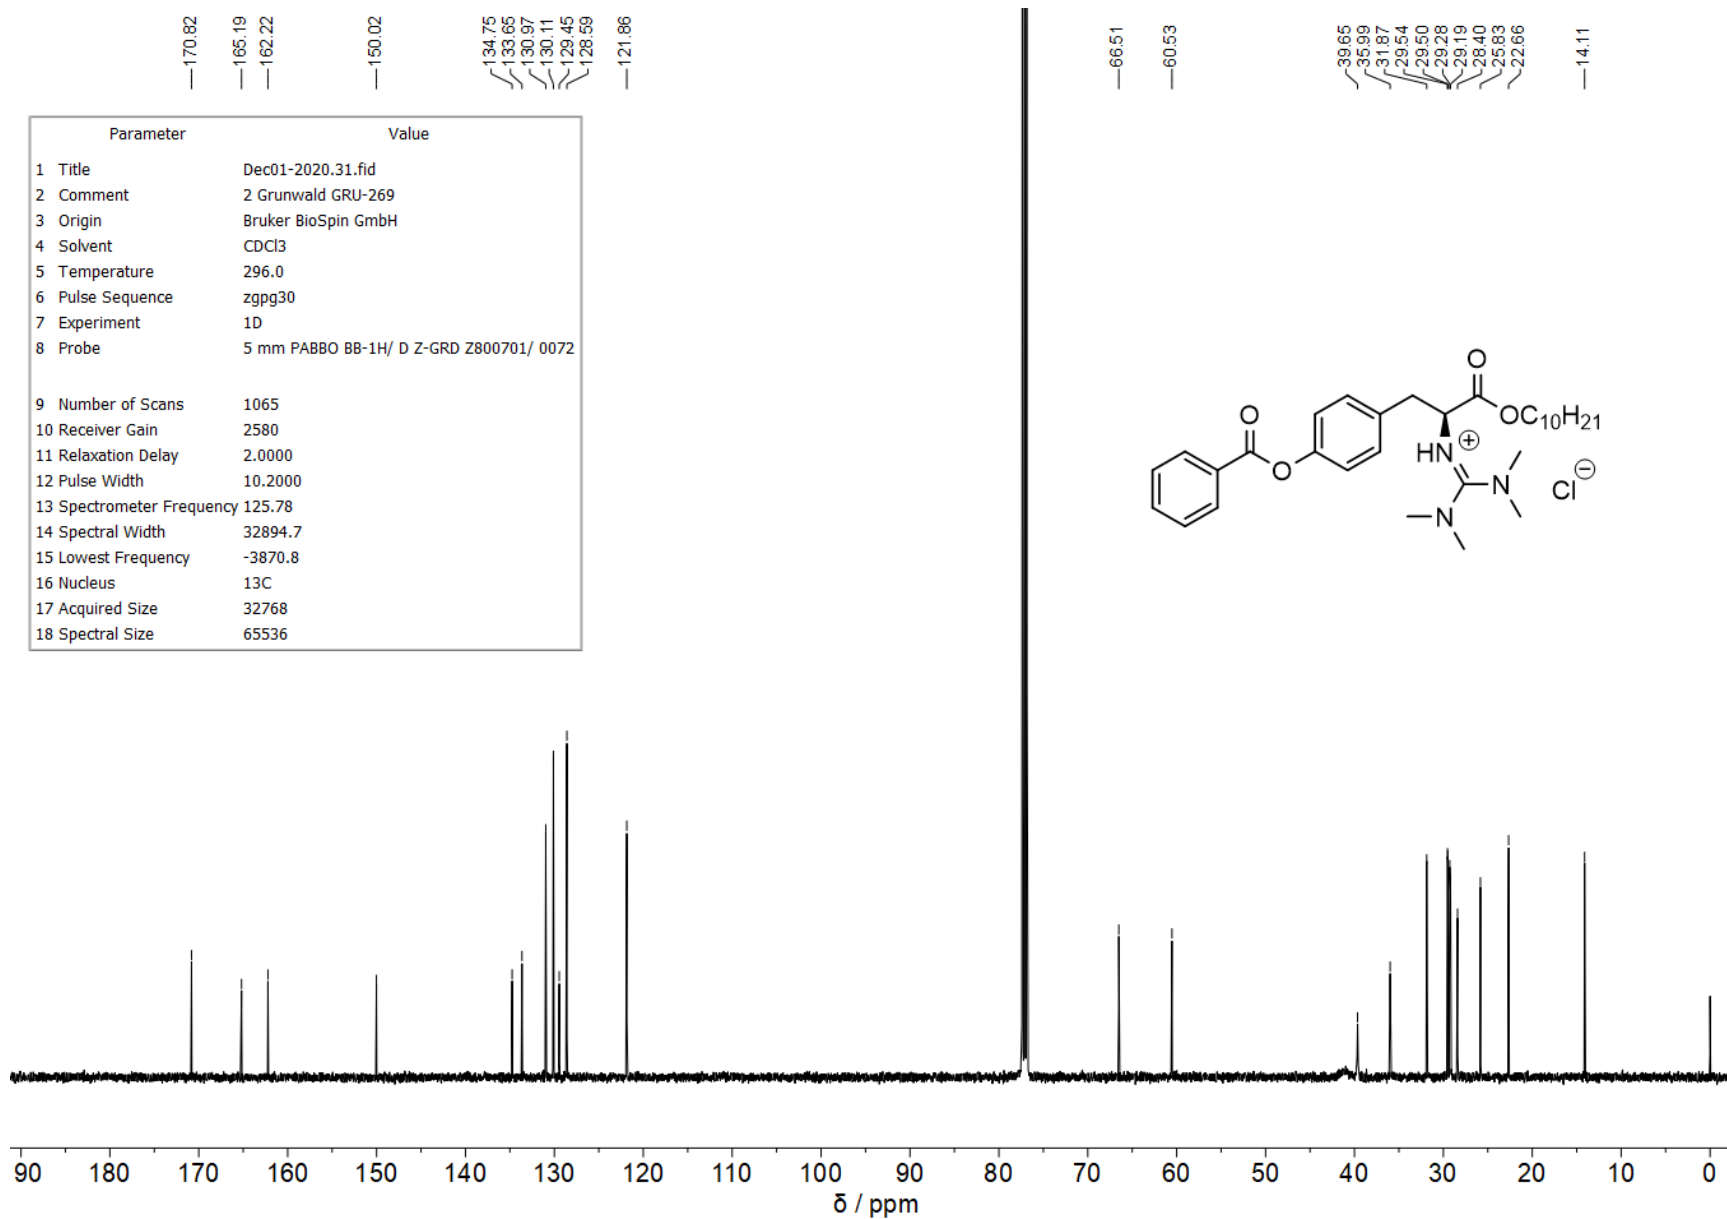

## BzTyrC12Cl

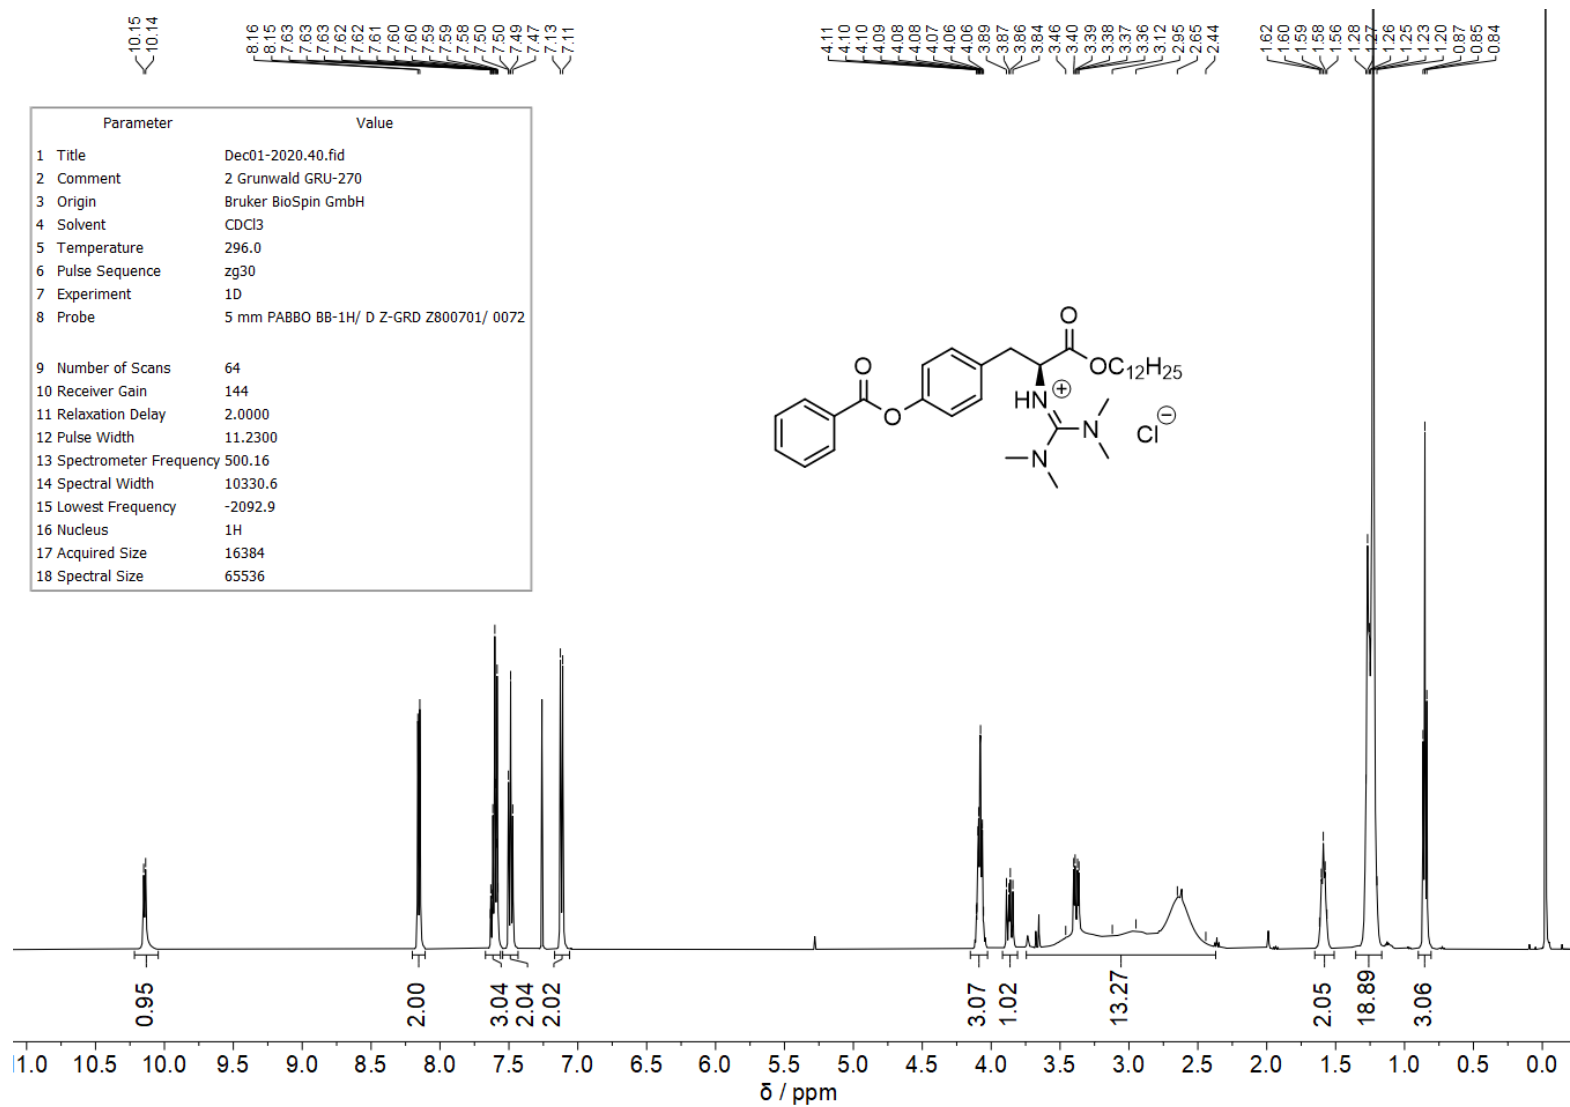



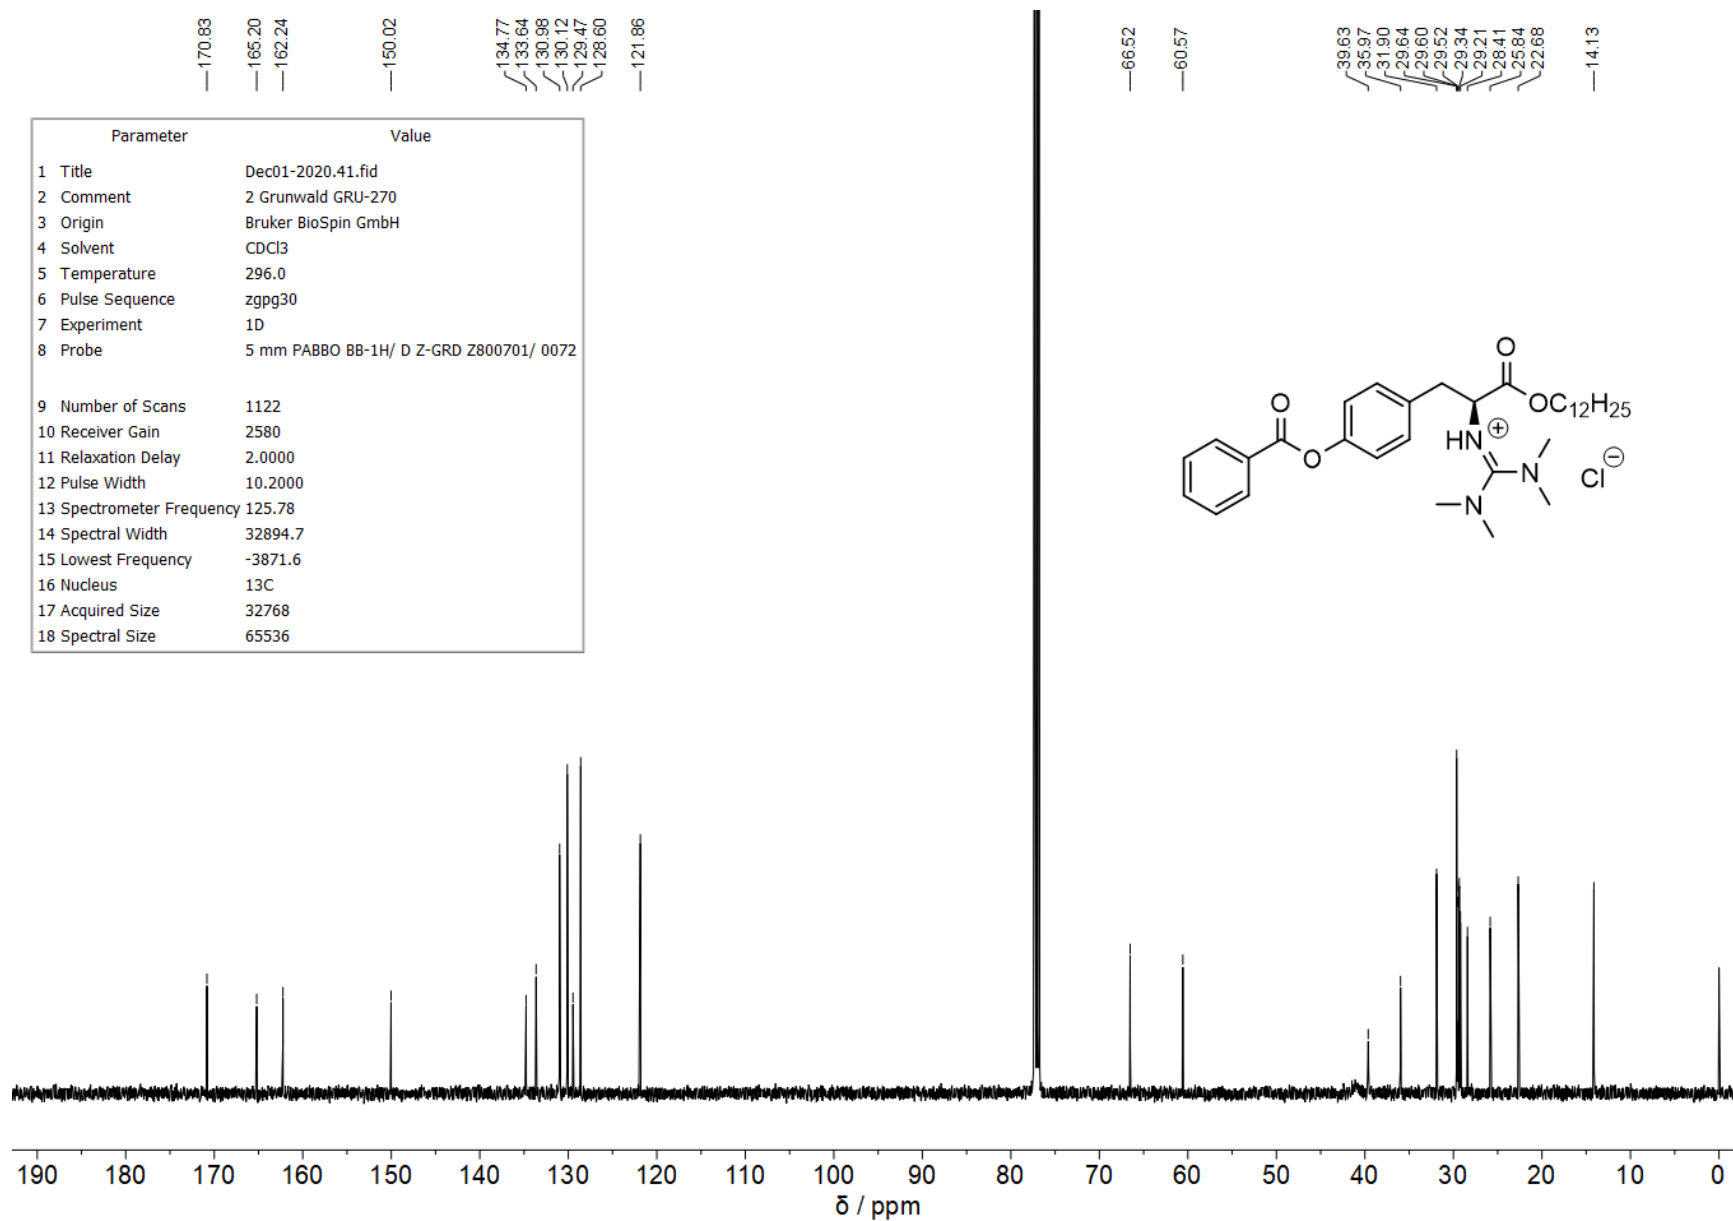

## BzTyrC14Cl

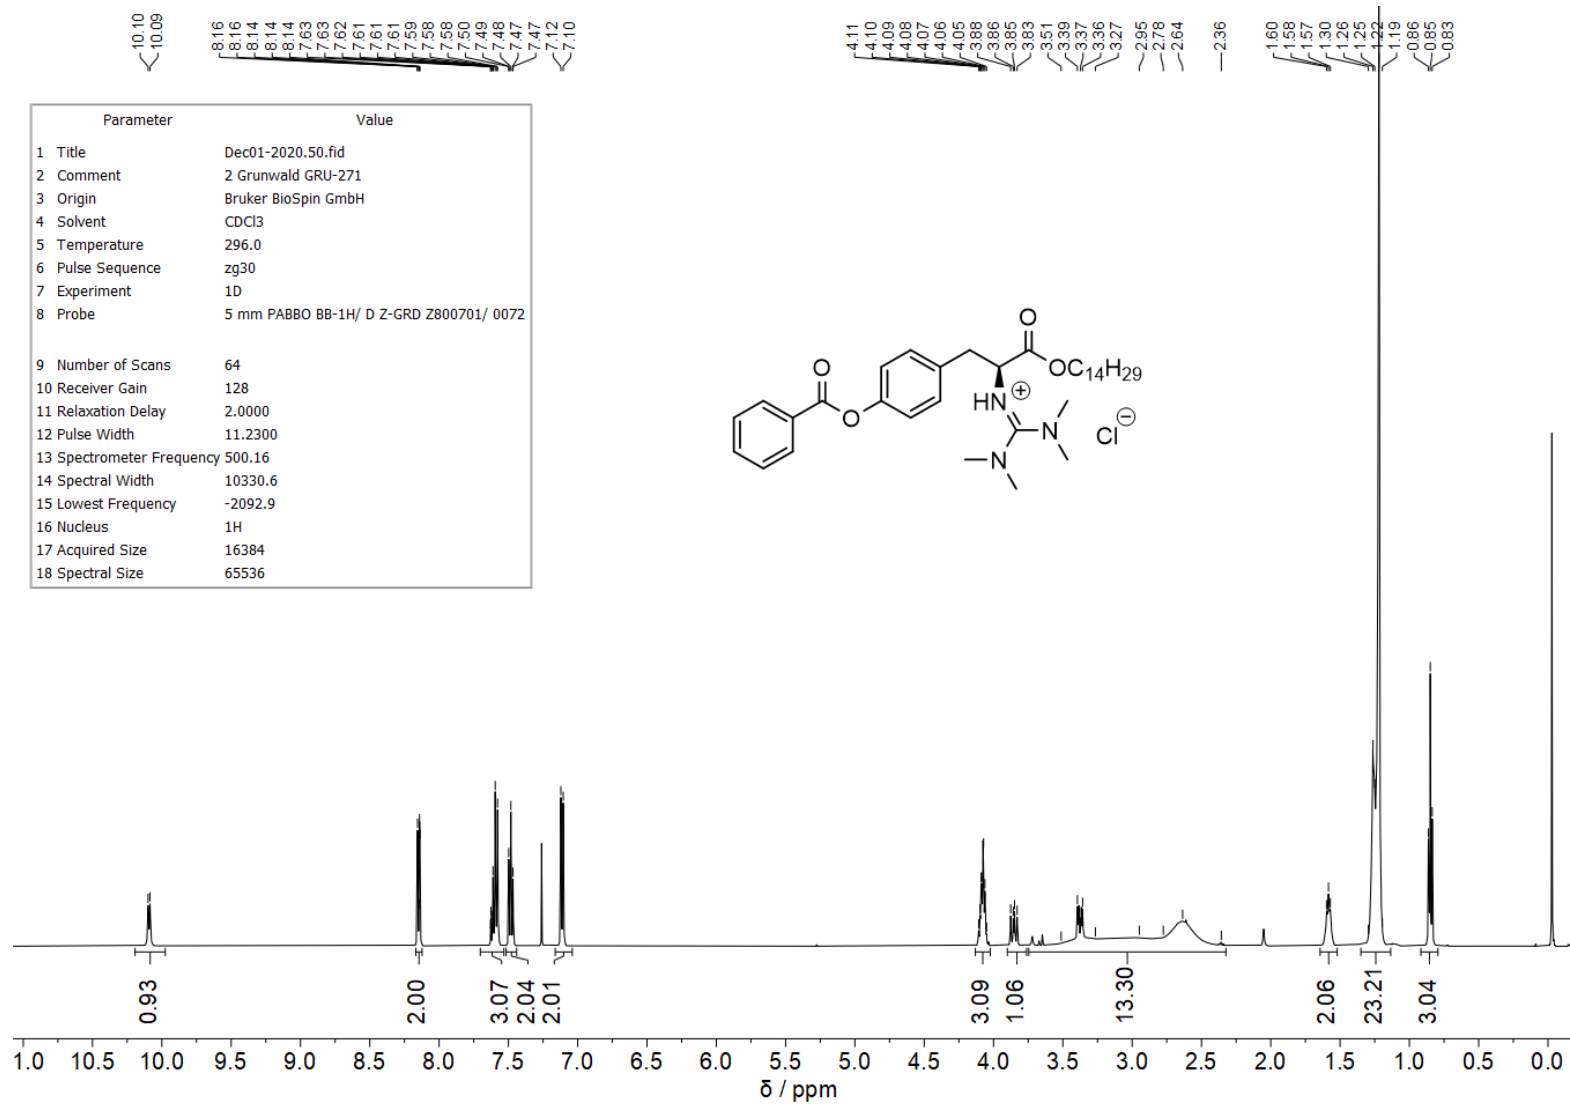

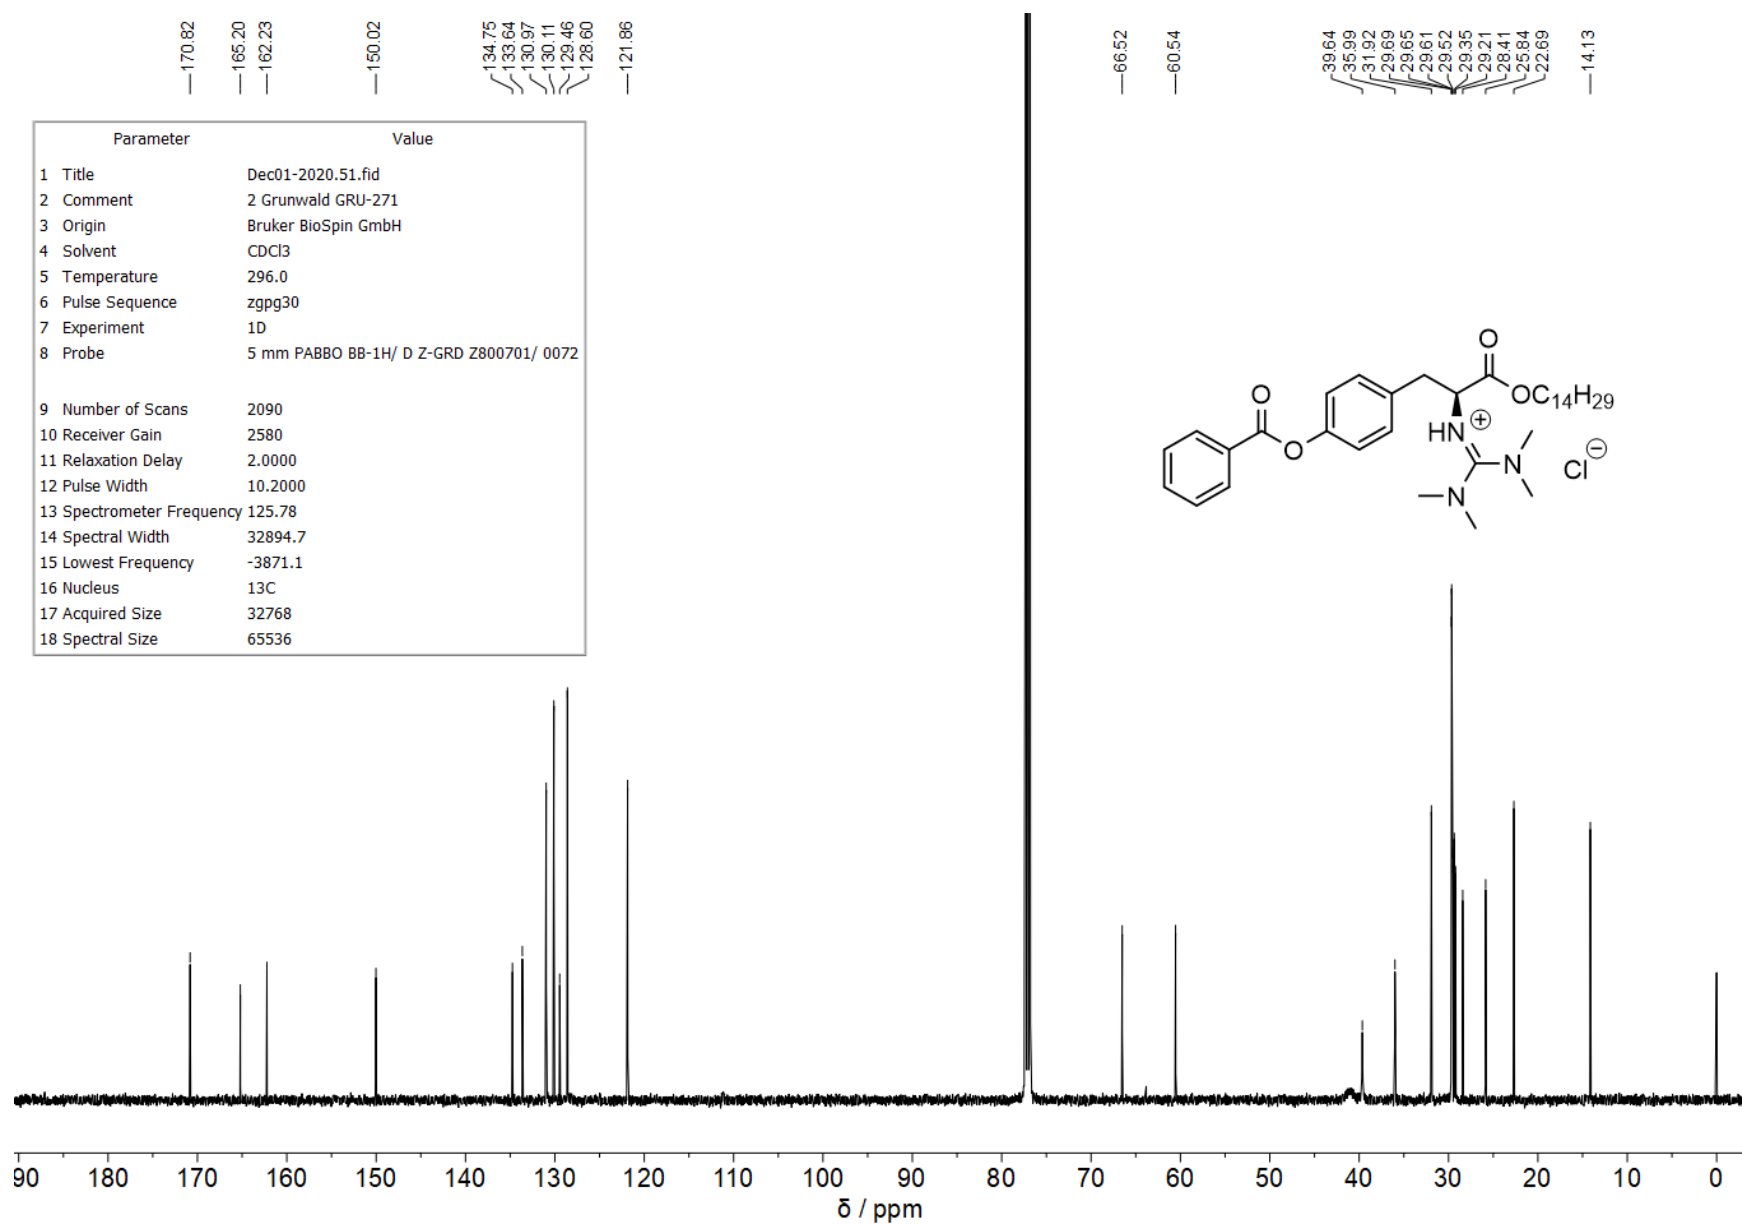

4-C<sub>10</sub>TyrC<sub>10</sub>Cl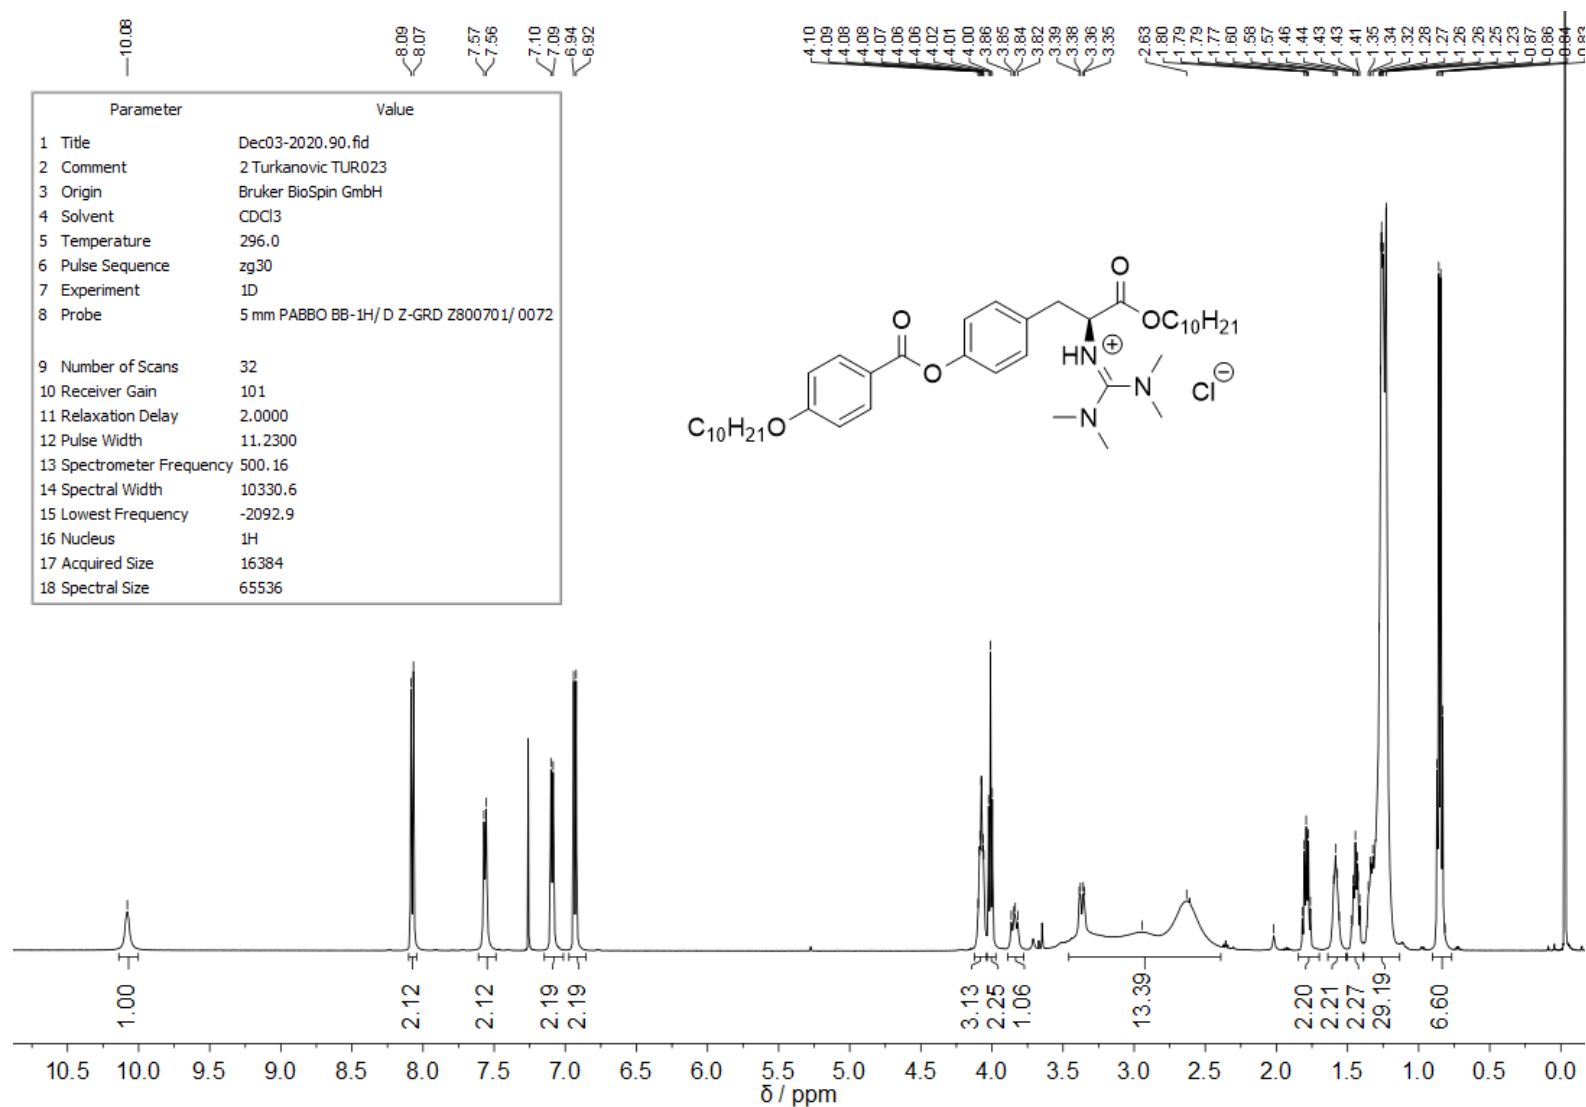

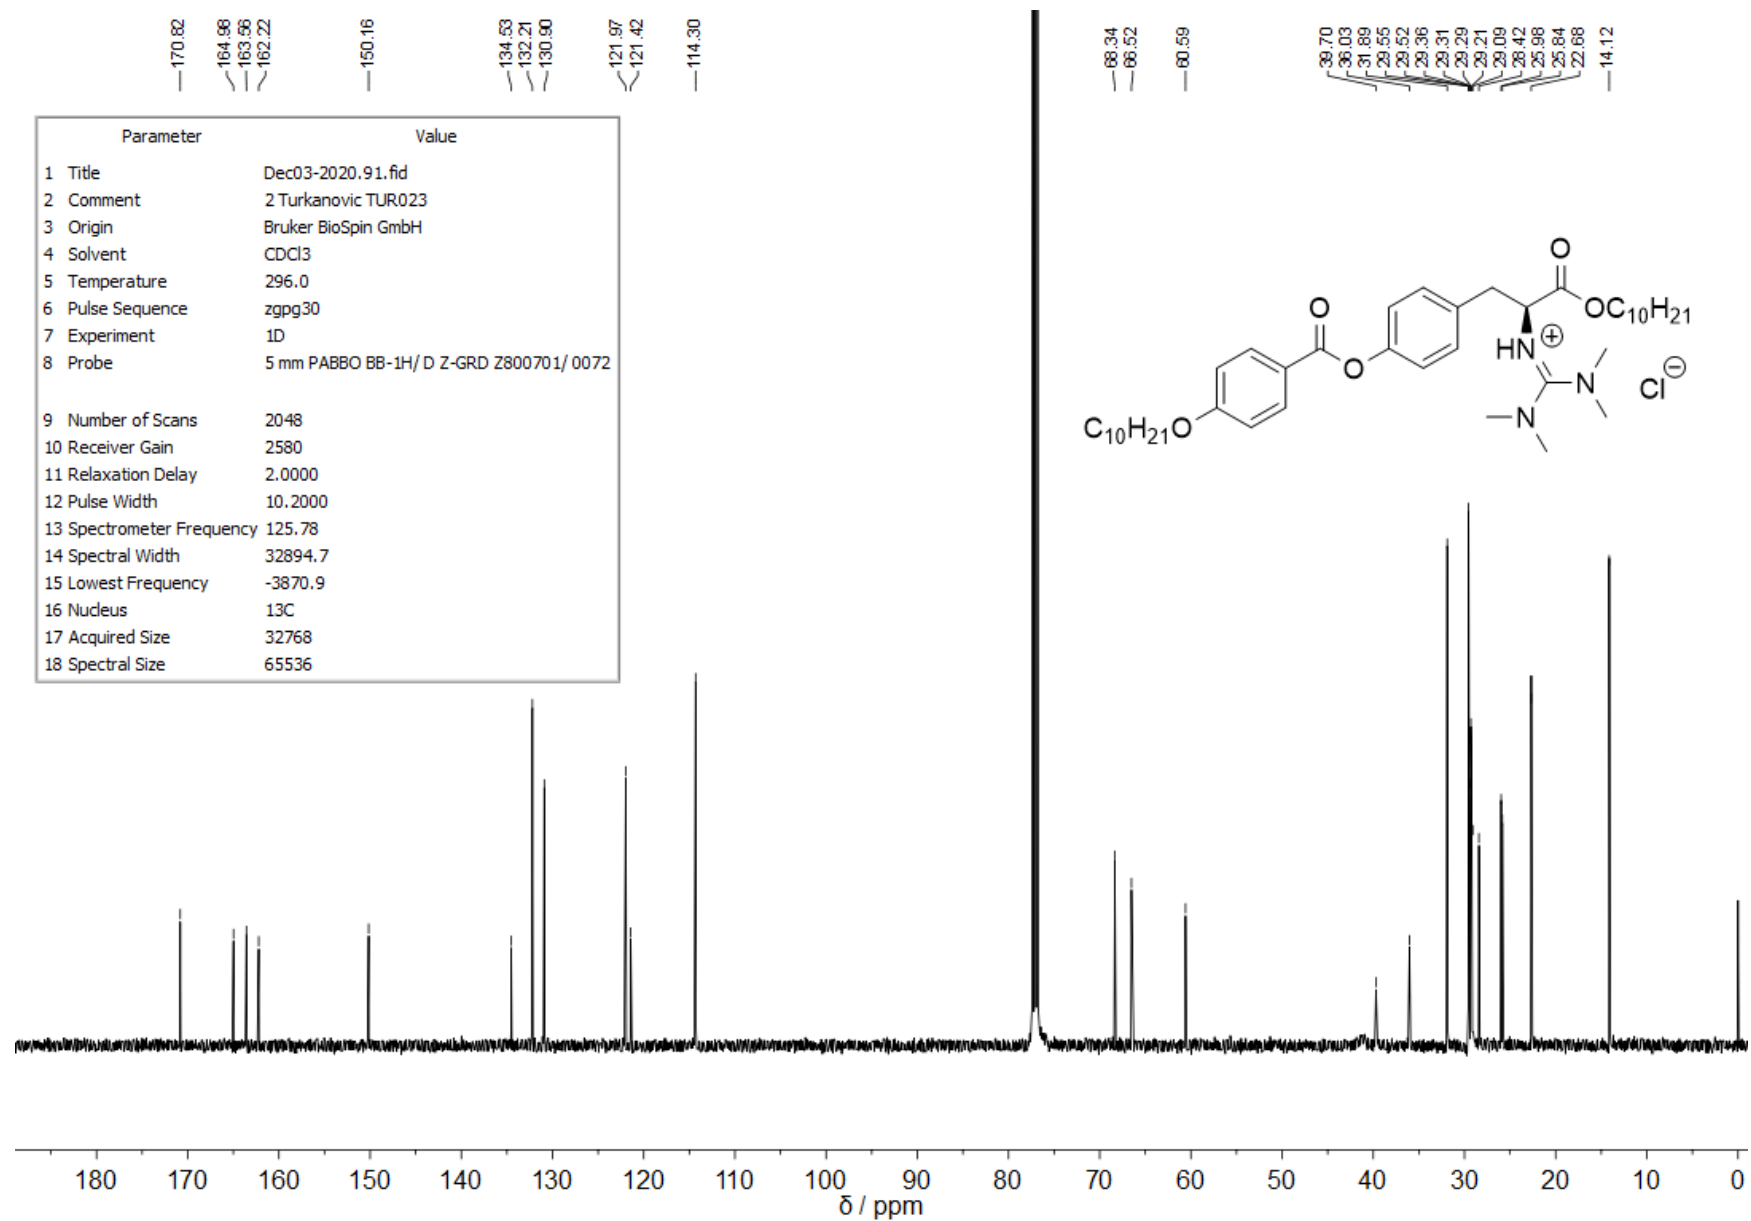

4-C<sub>12</sub>TyrC<sub>10</sub>Cl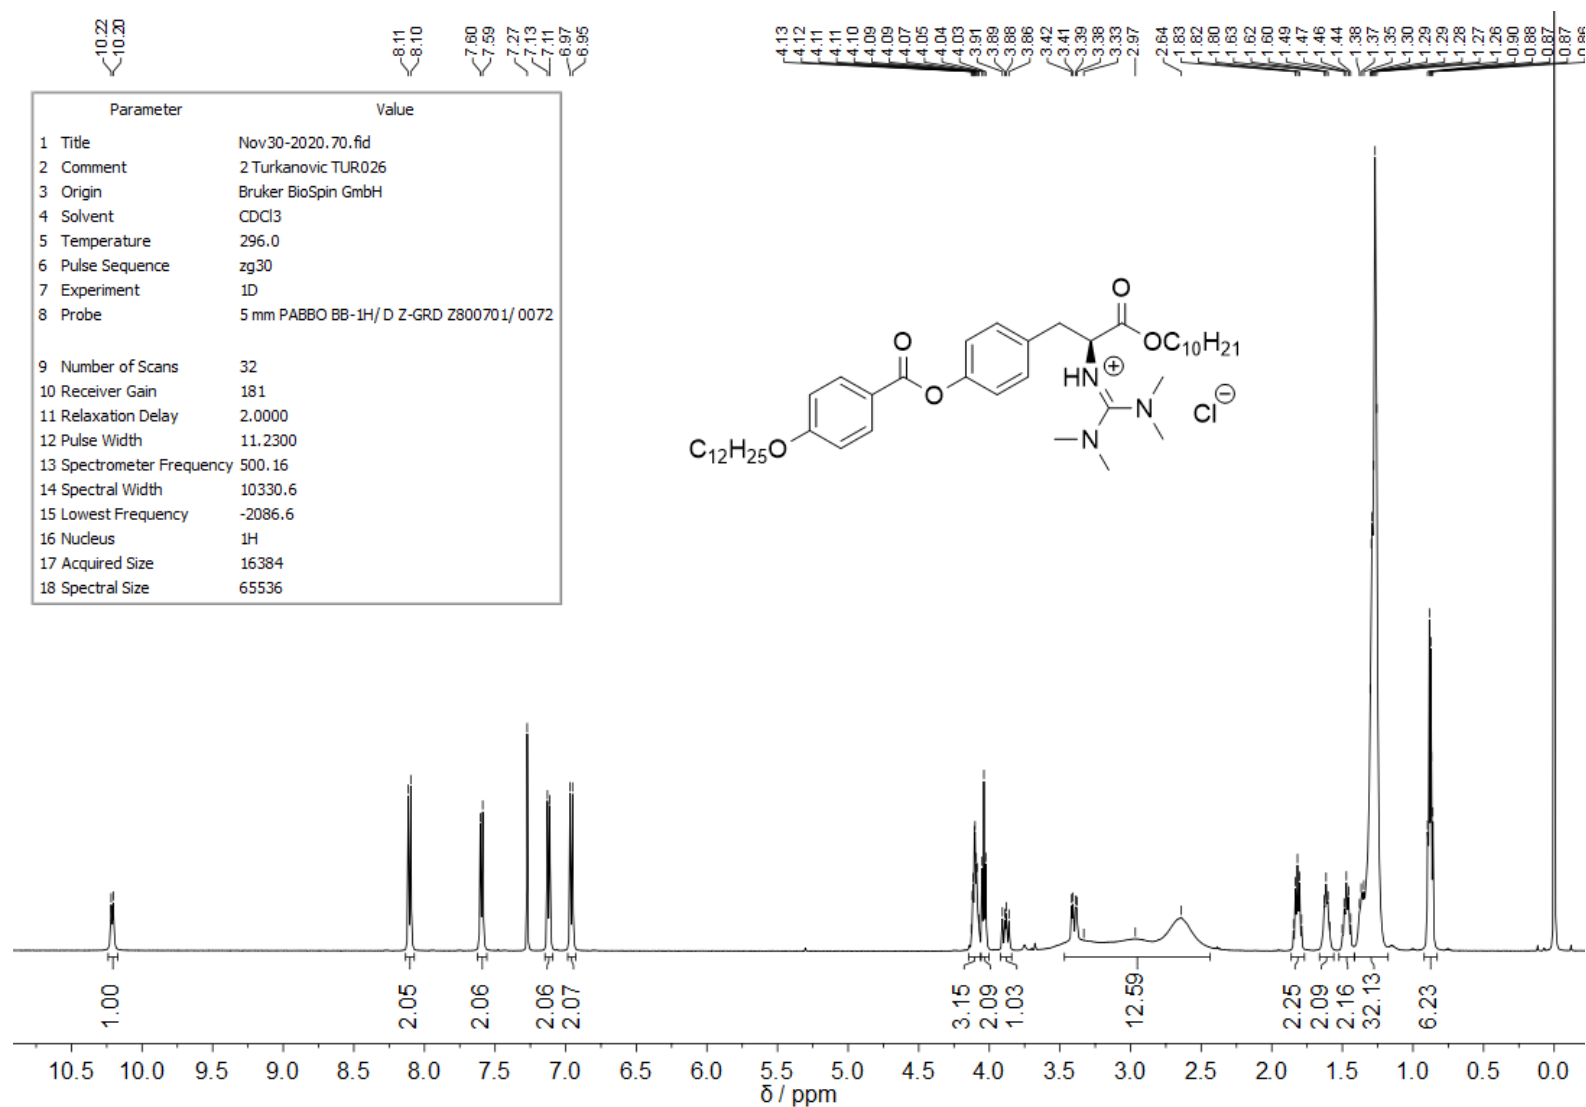

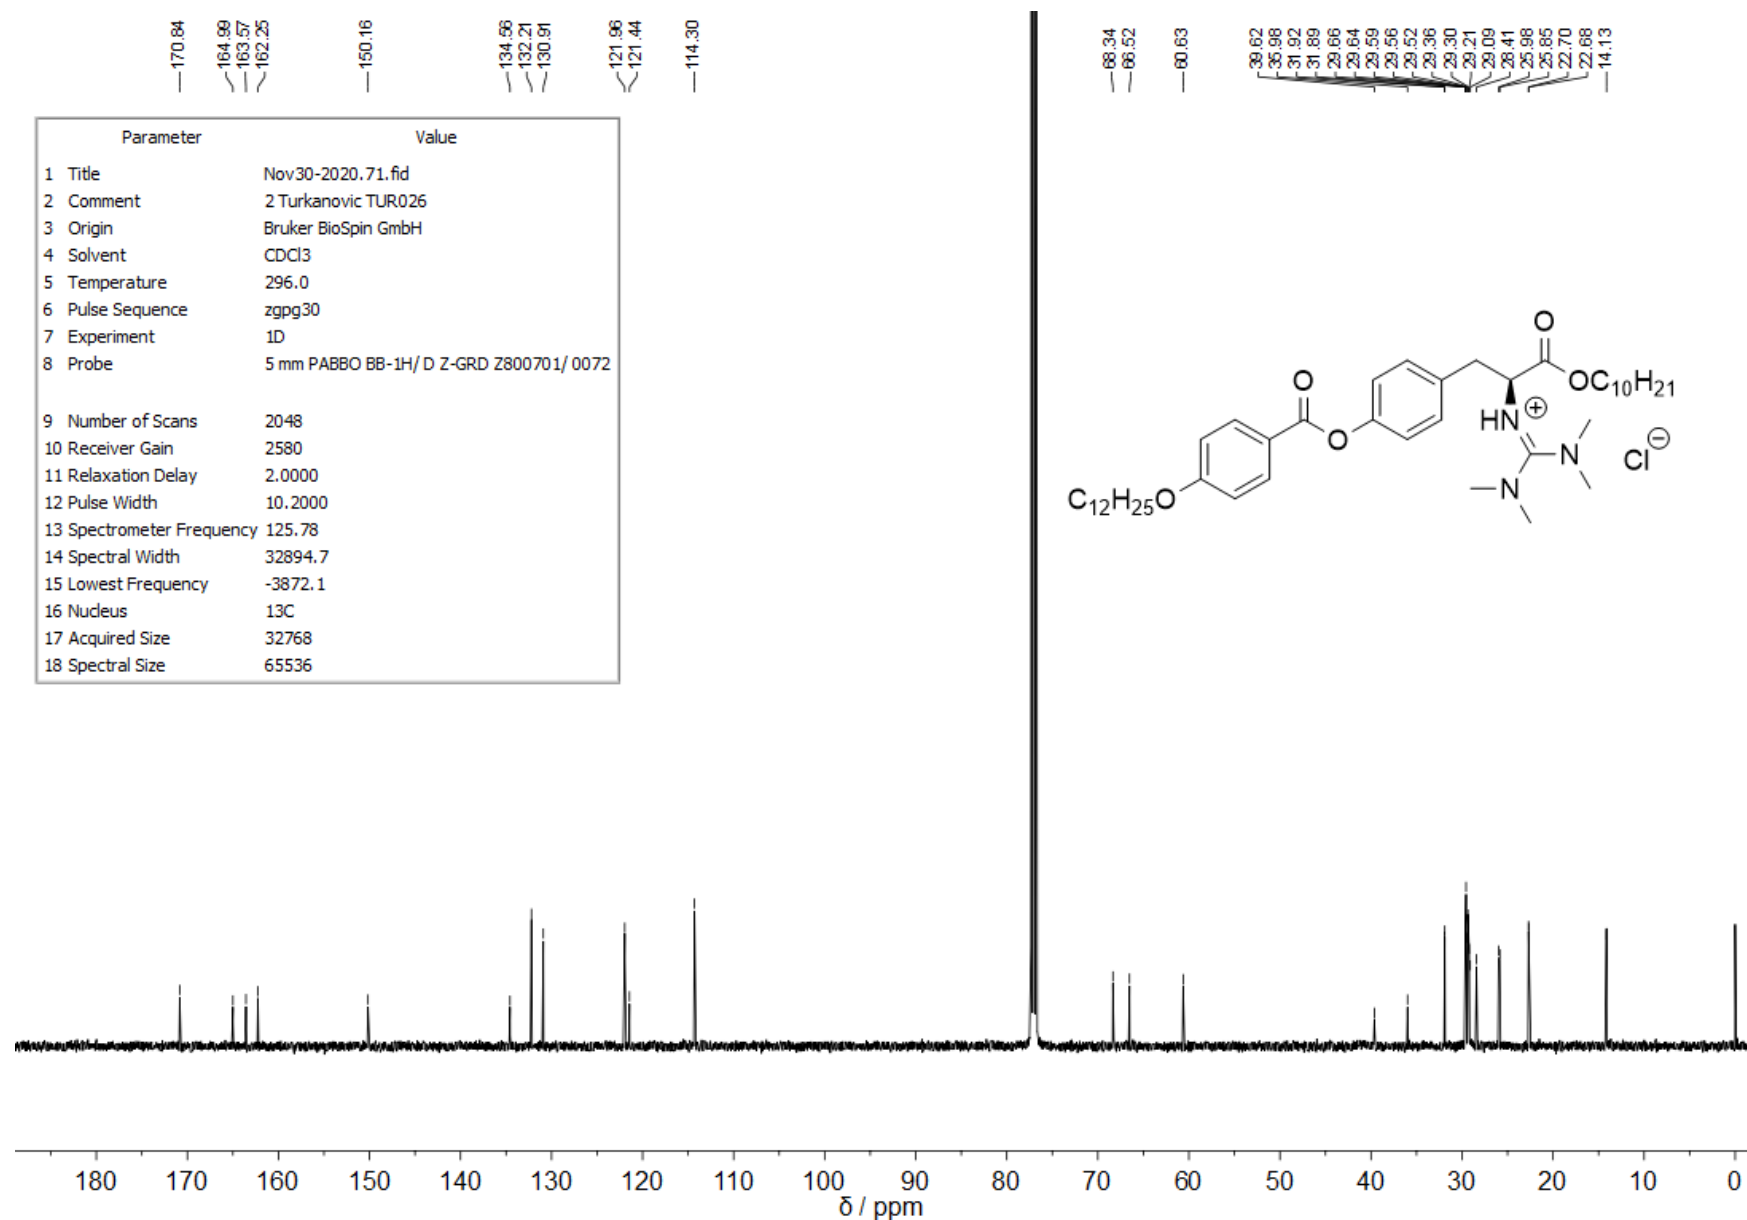

4-C<sub>14</sub>TyrC<sub>10</sub>Cl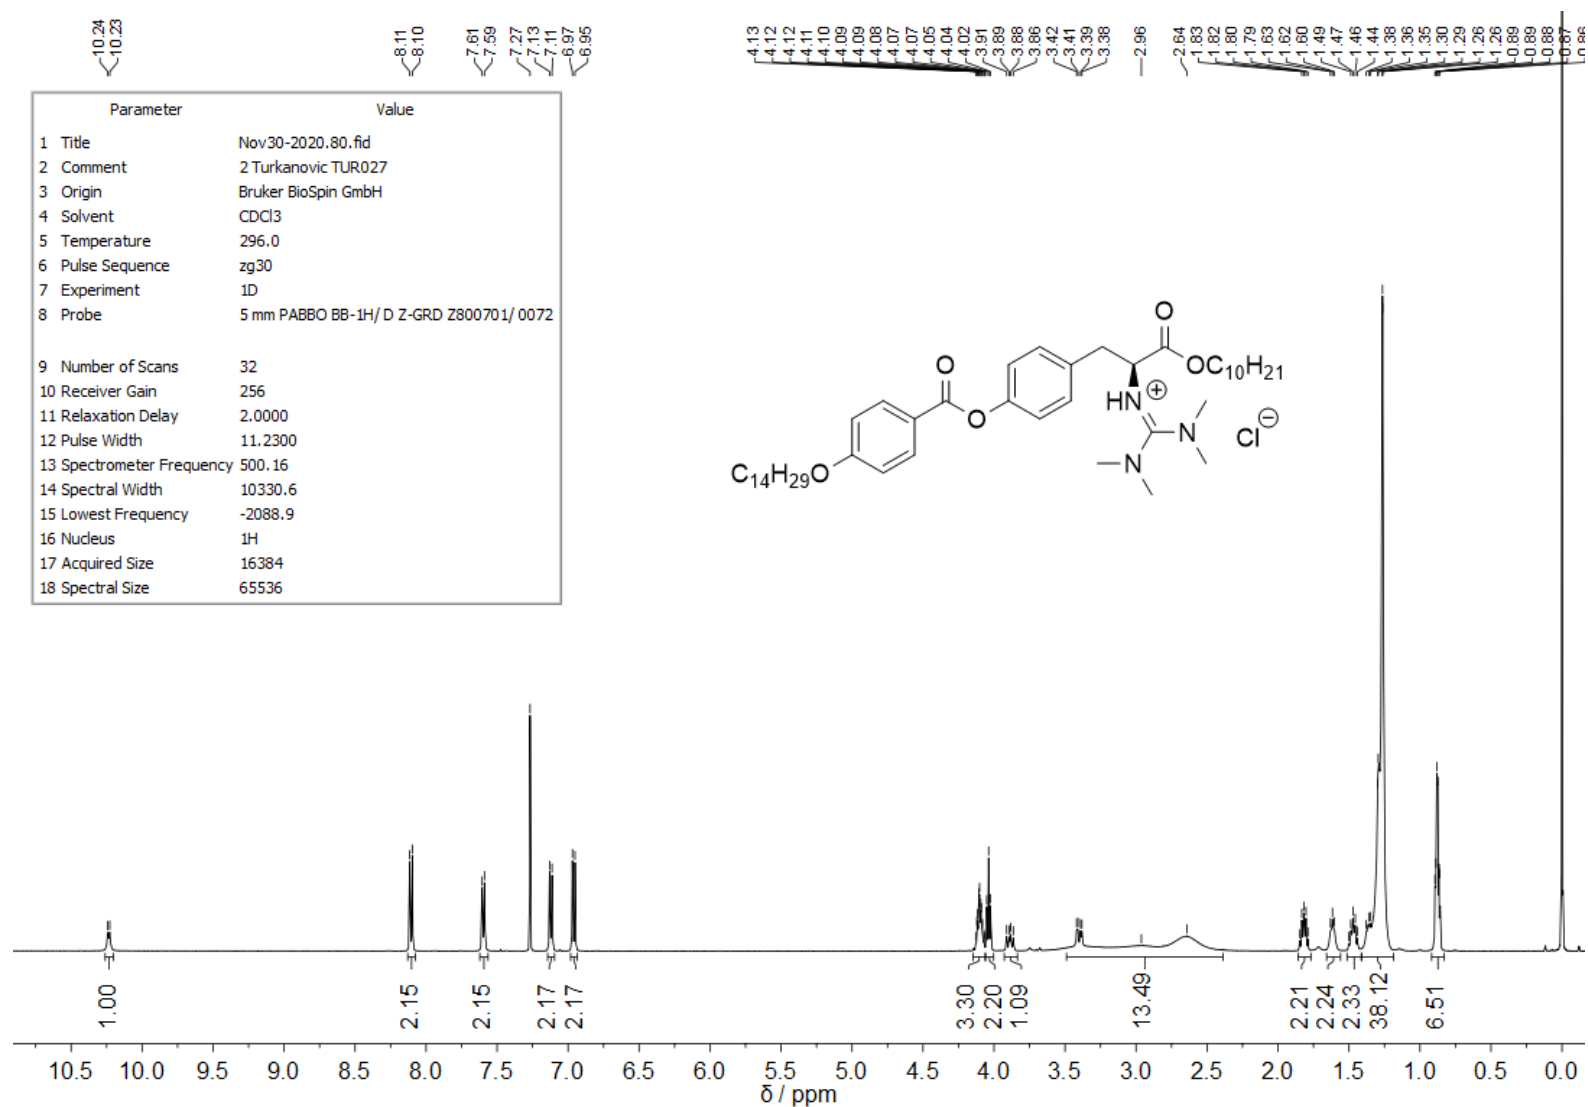



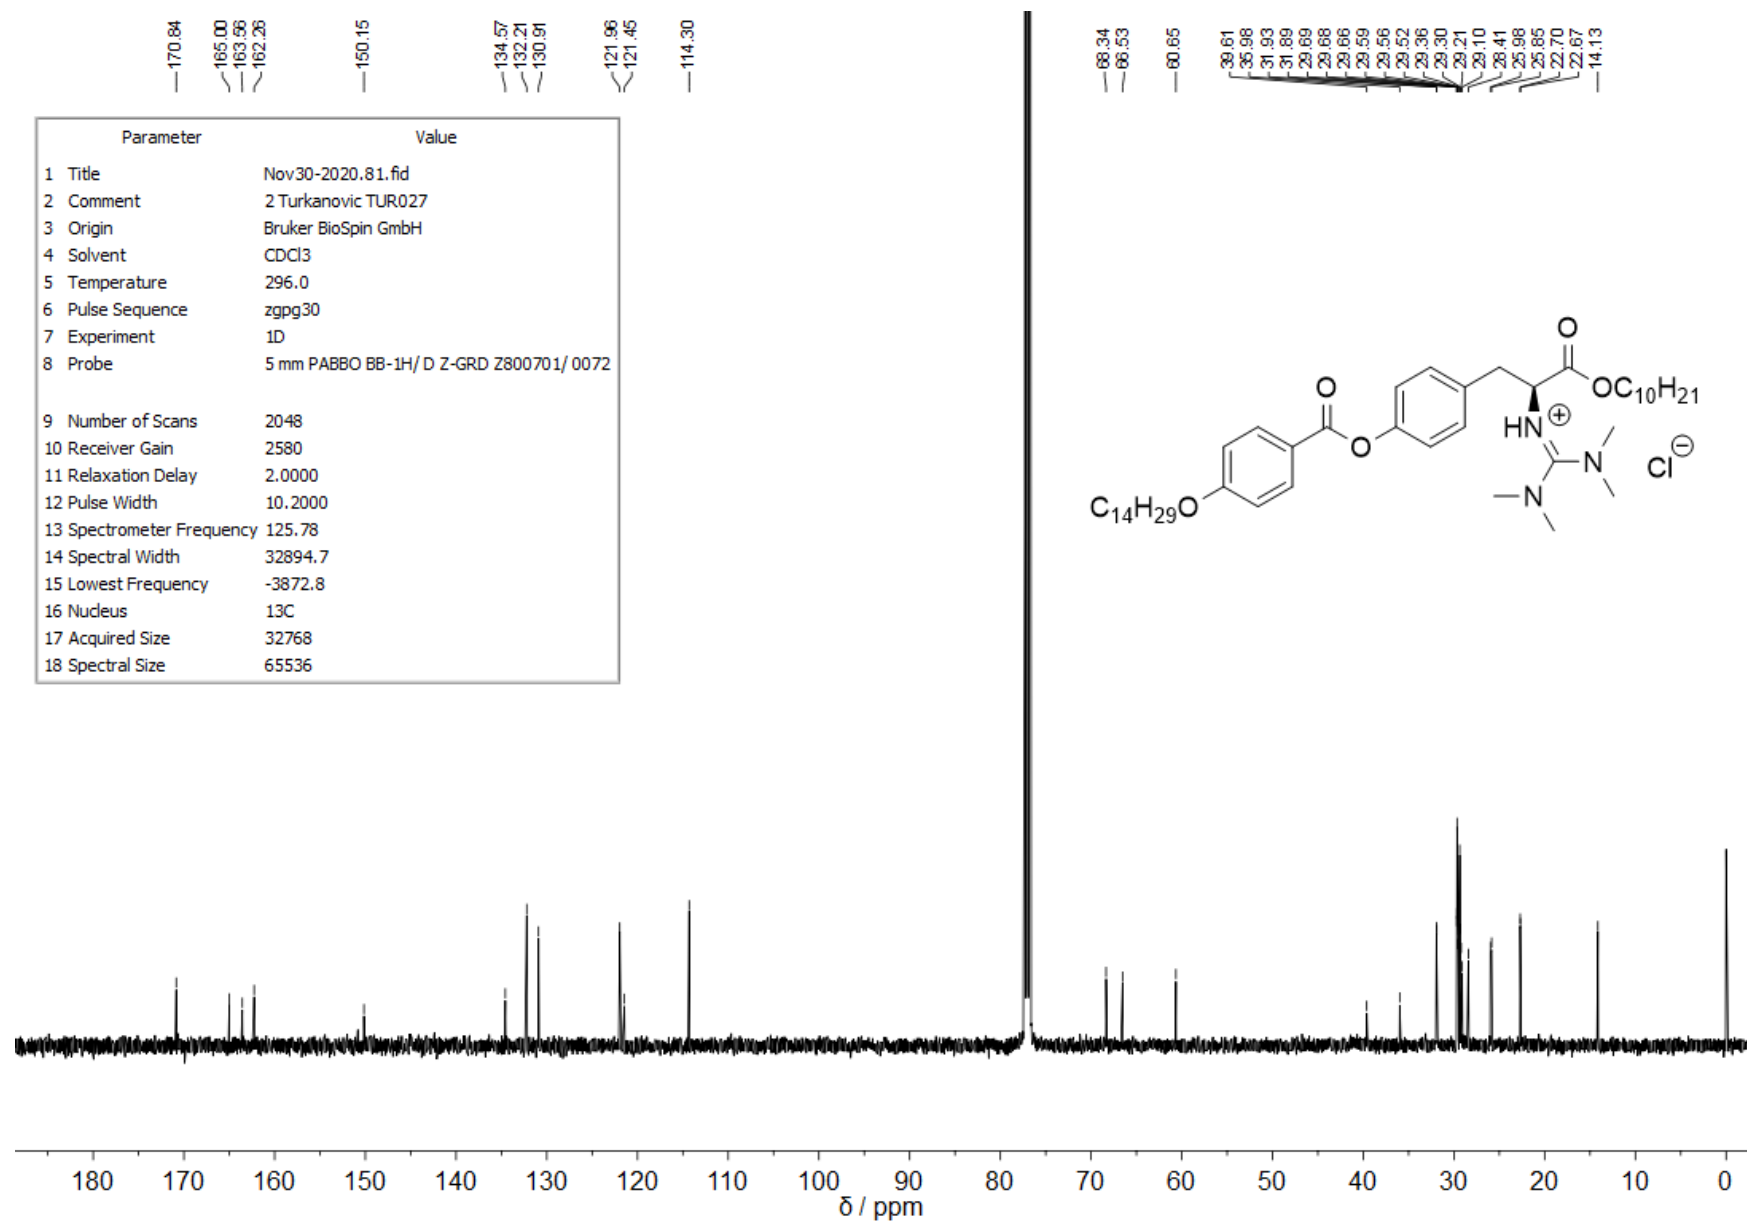

4-C<sub>10</sub>TyrC<sub>12</sub>Cl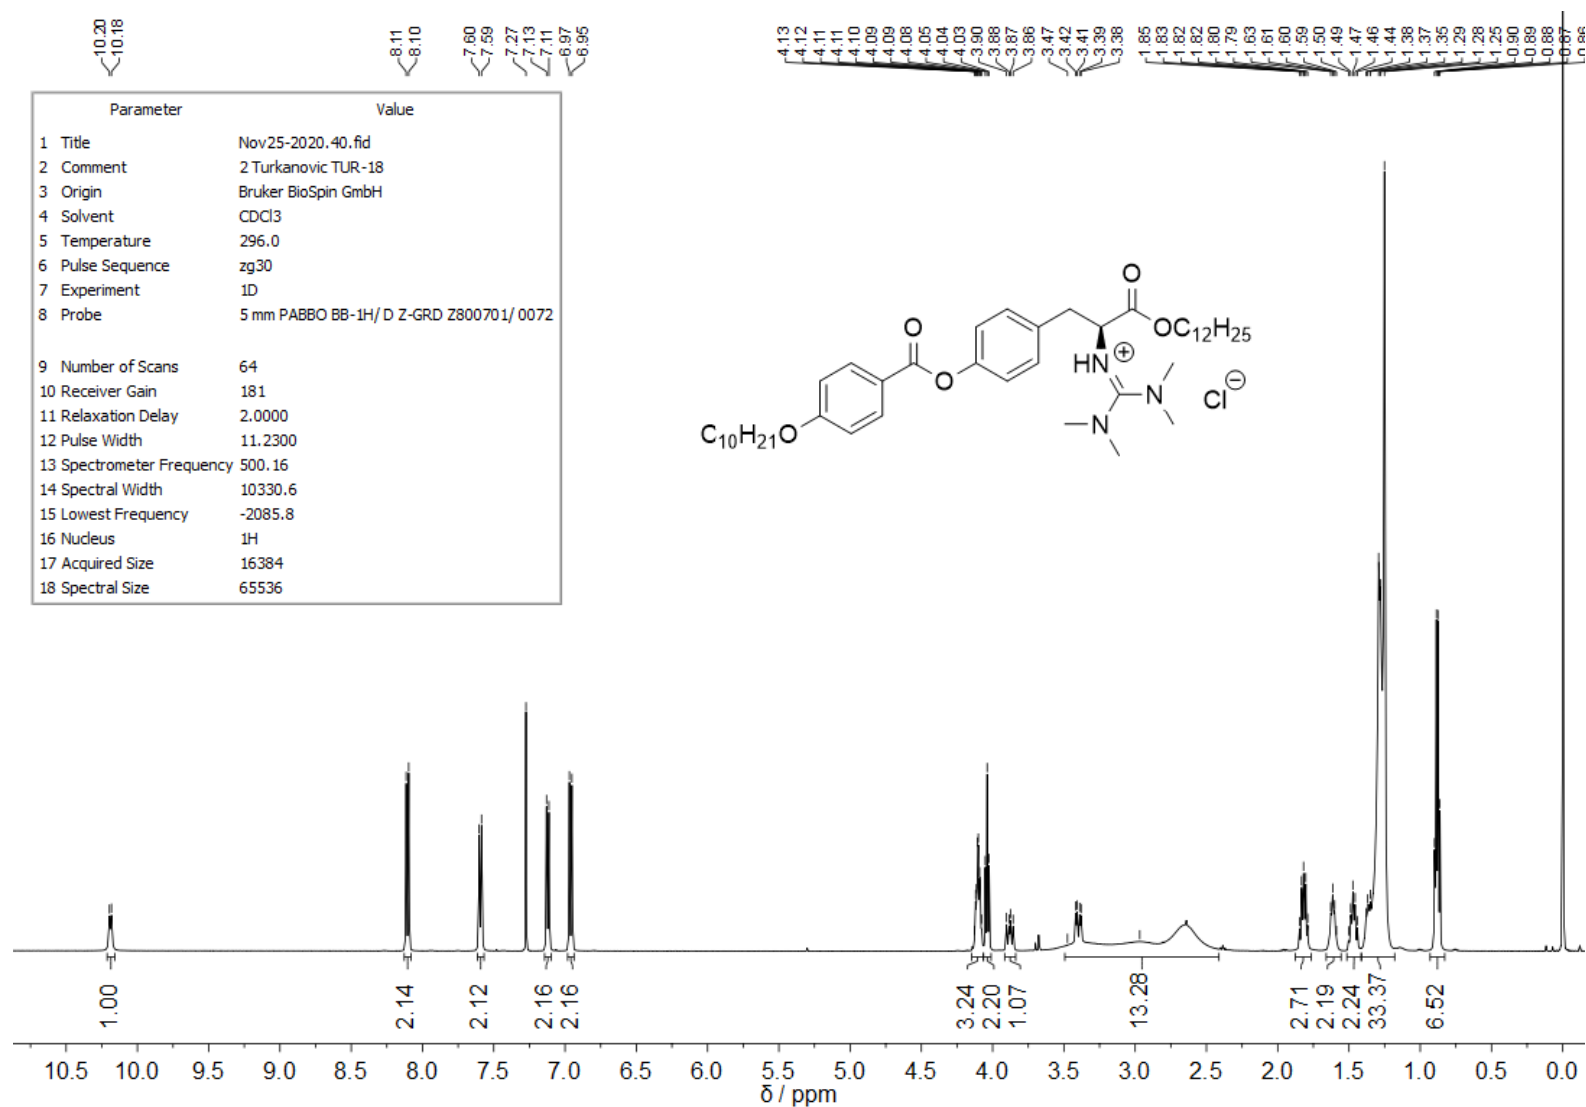

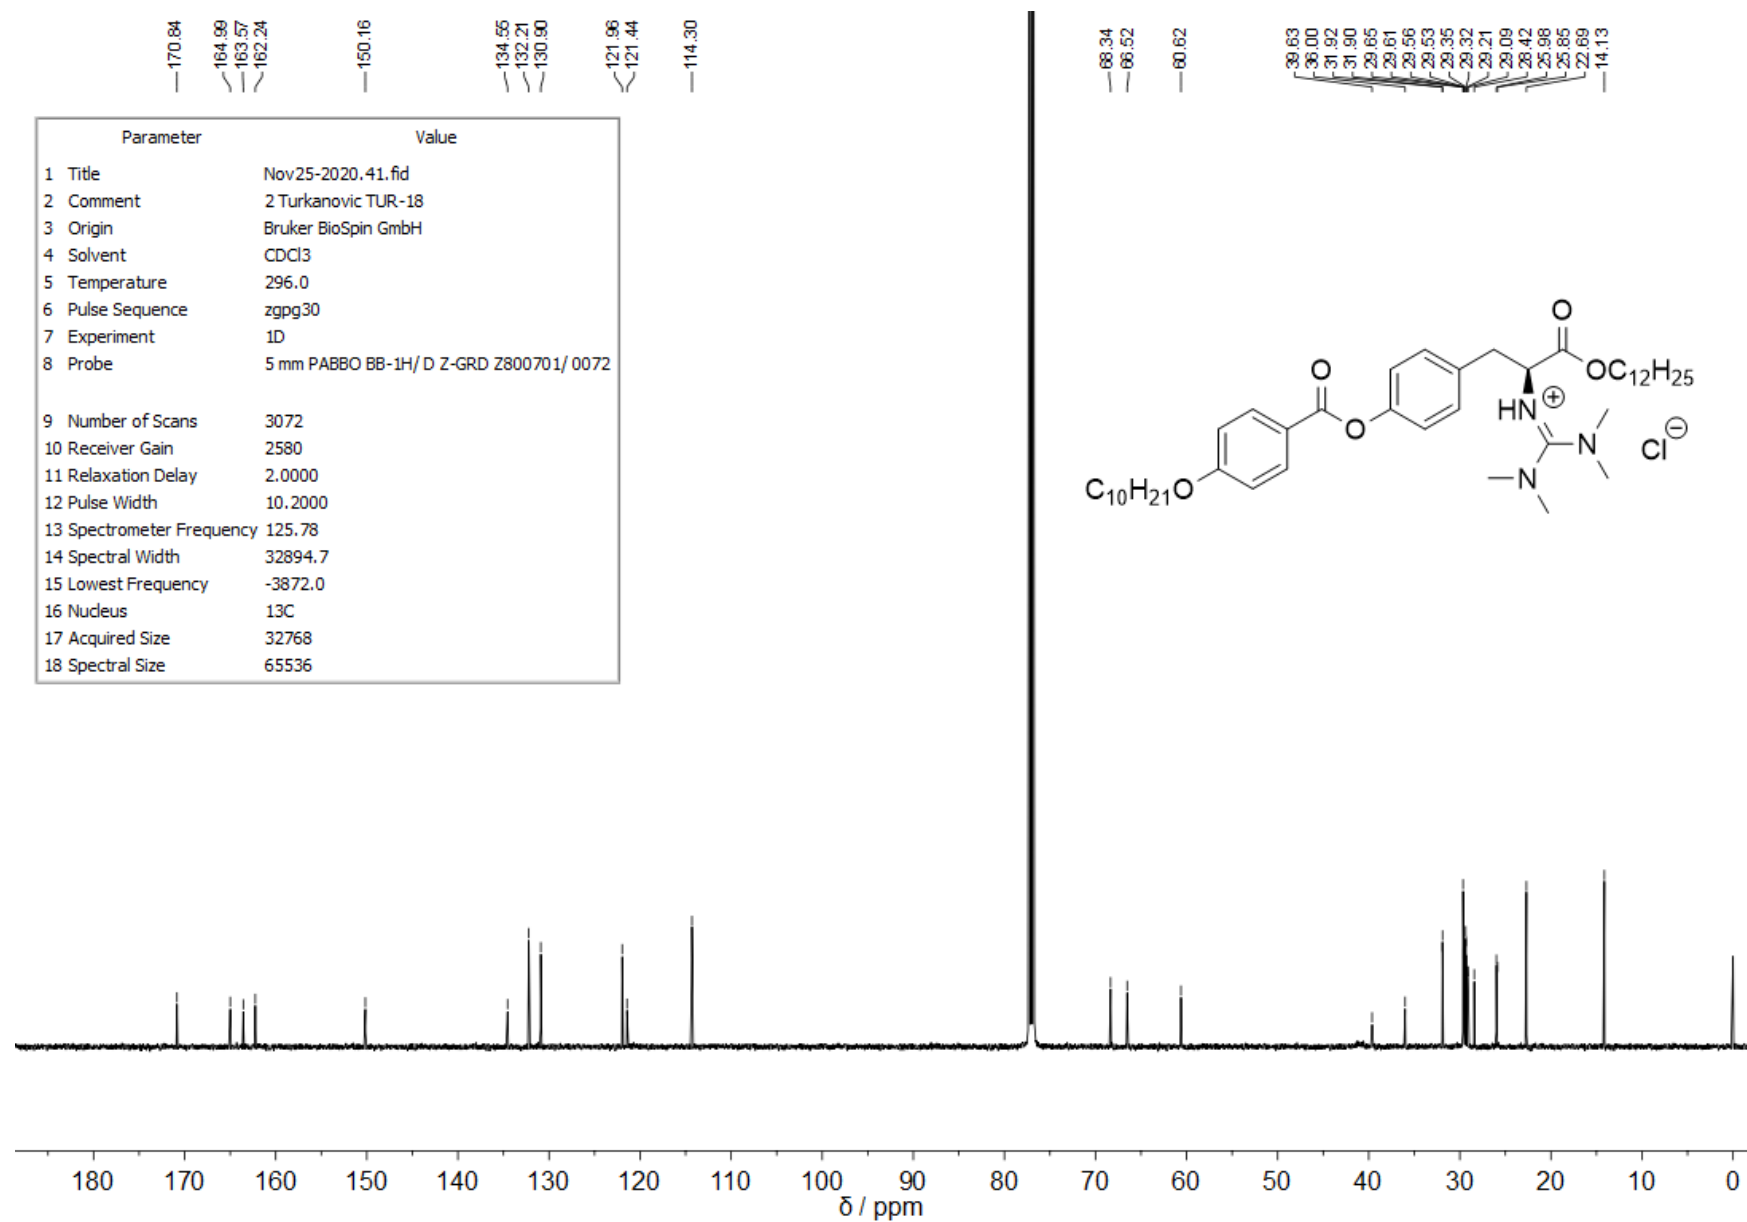

4-C<sub>12</sub>TyrC<sub>12</sub>Cl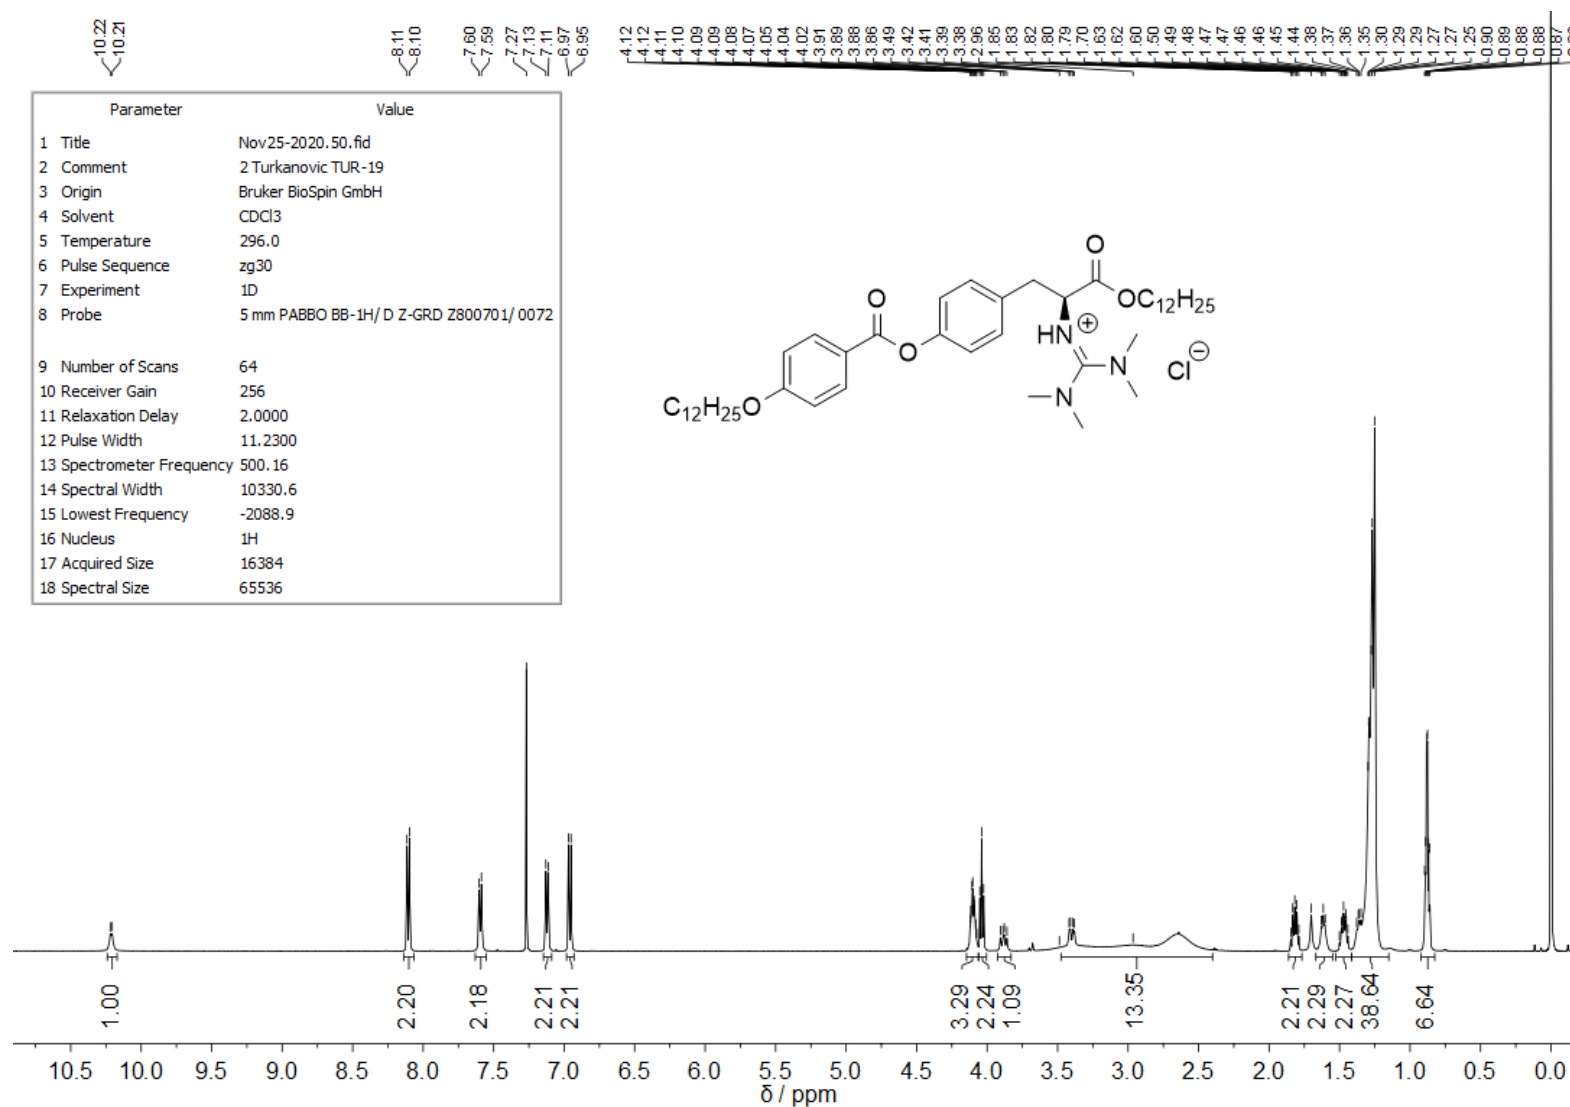

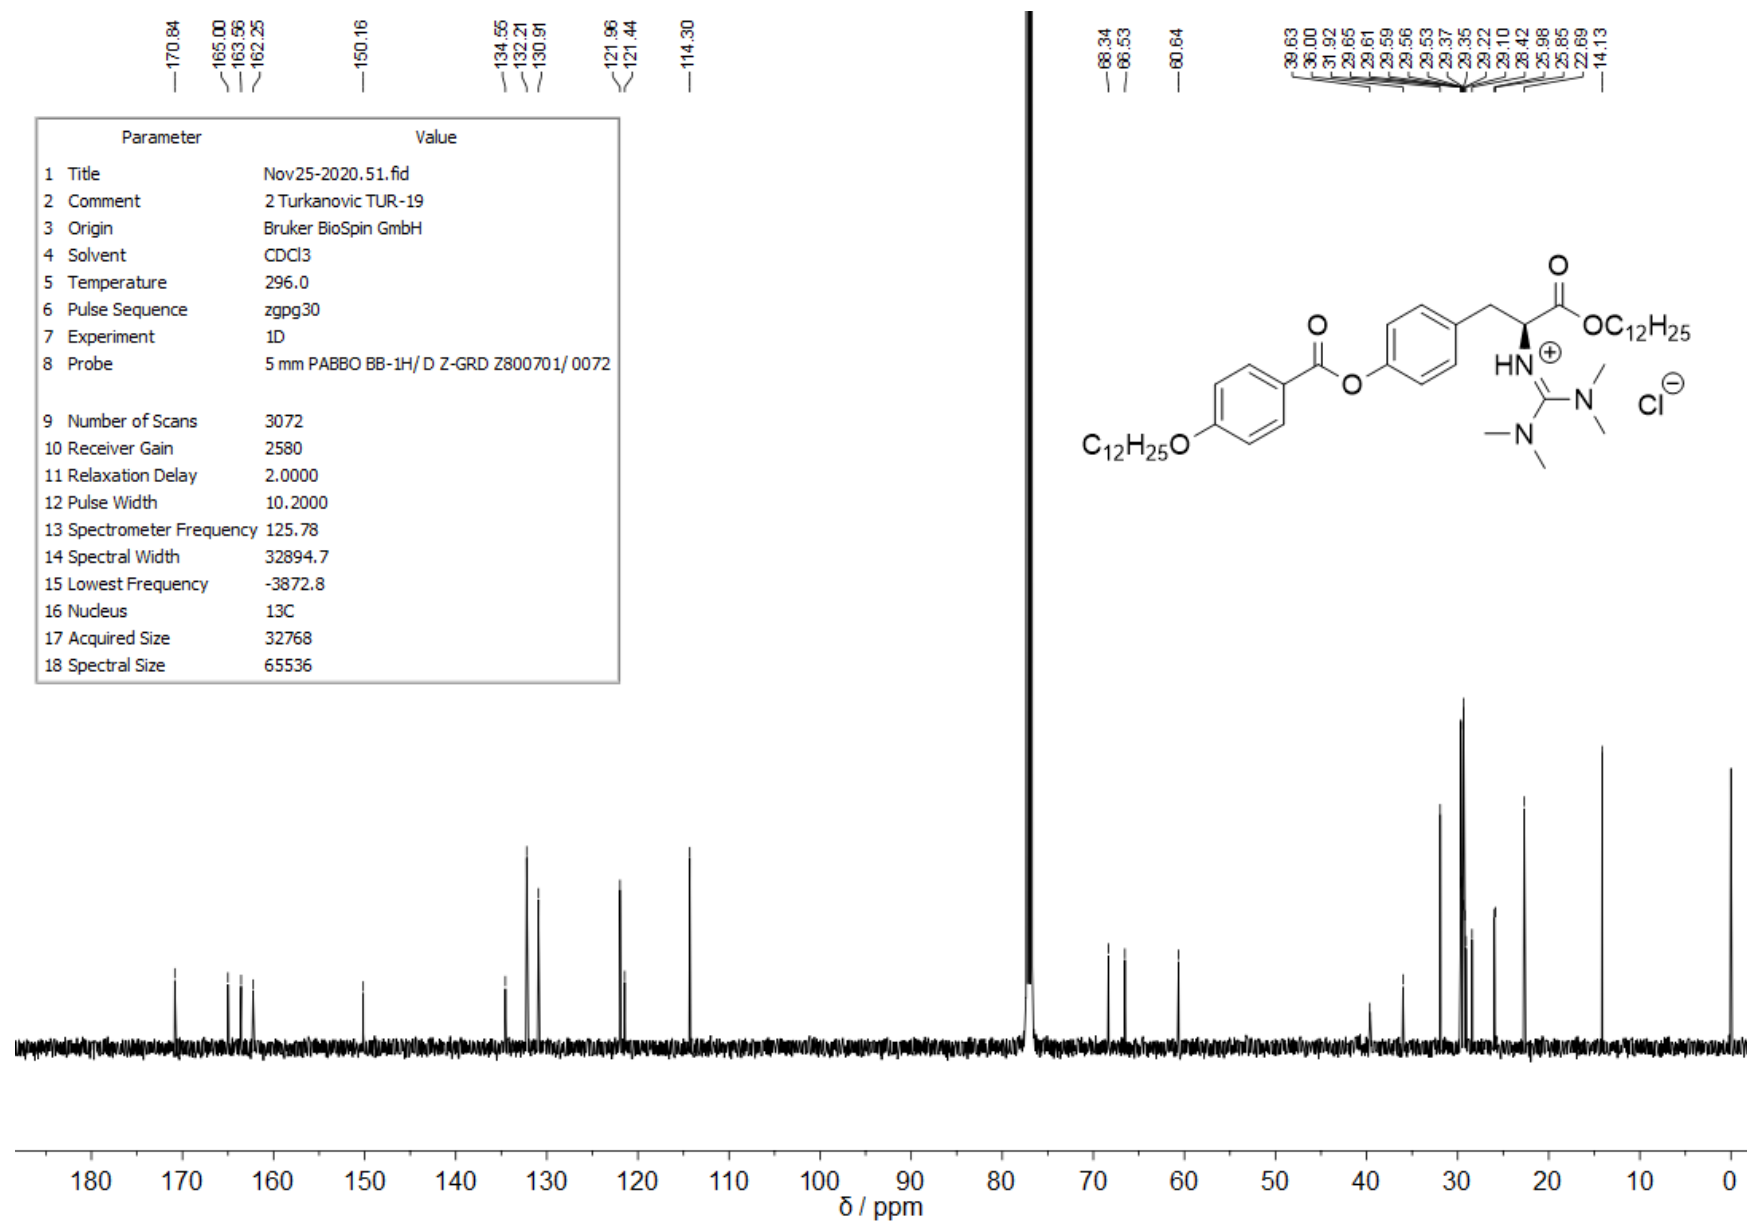

4-C<sub>14</sub>TyrC<sub>12</sub>Cl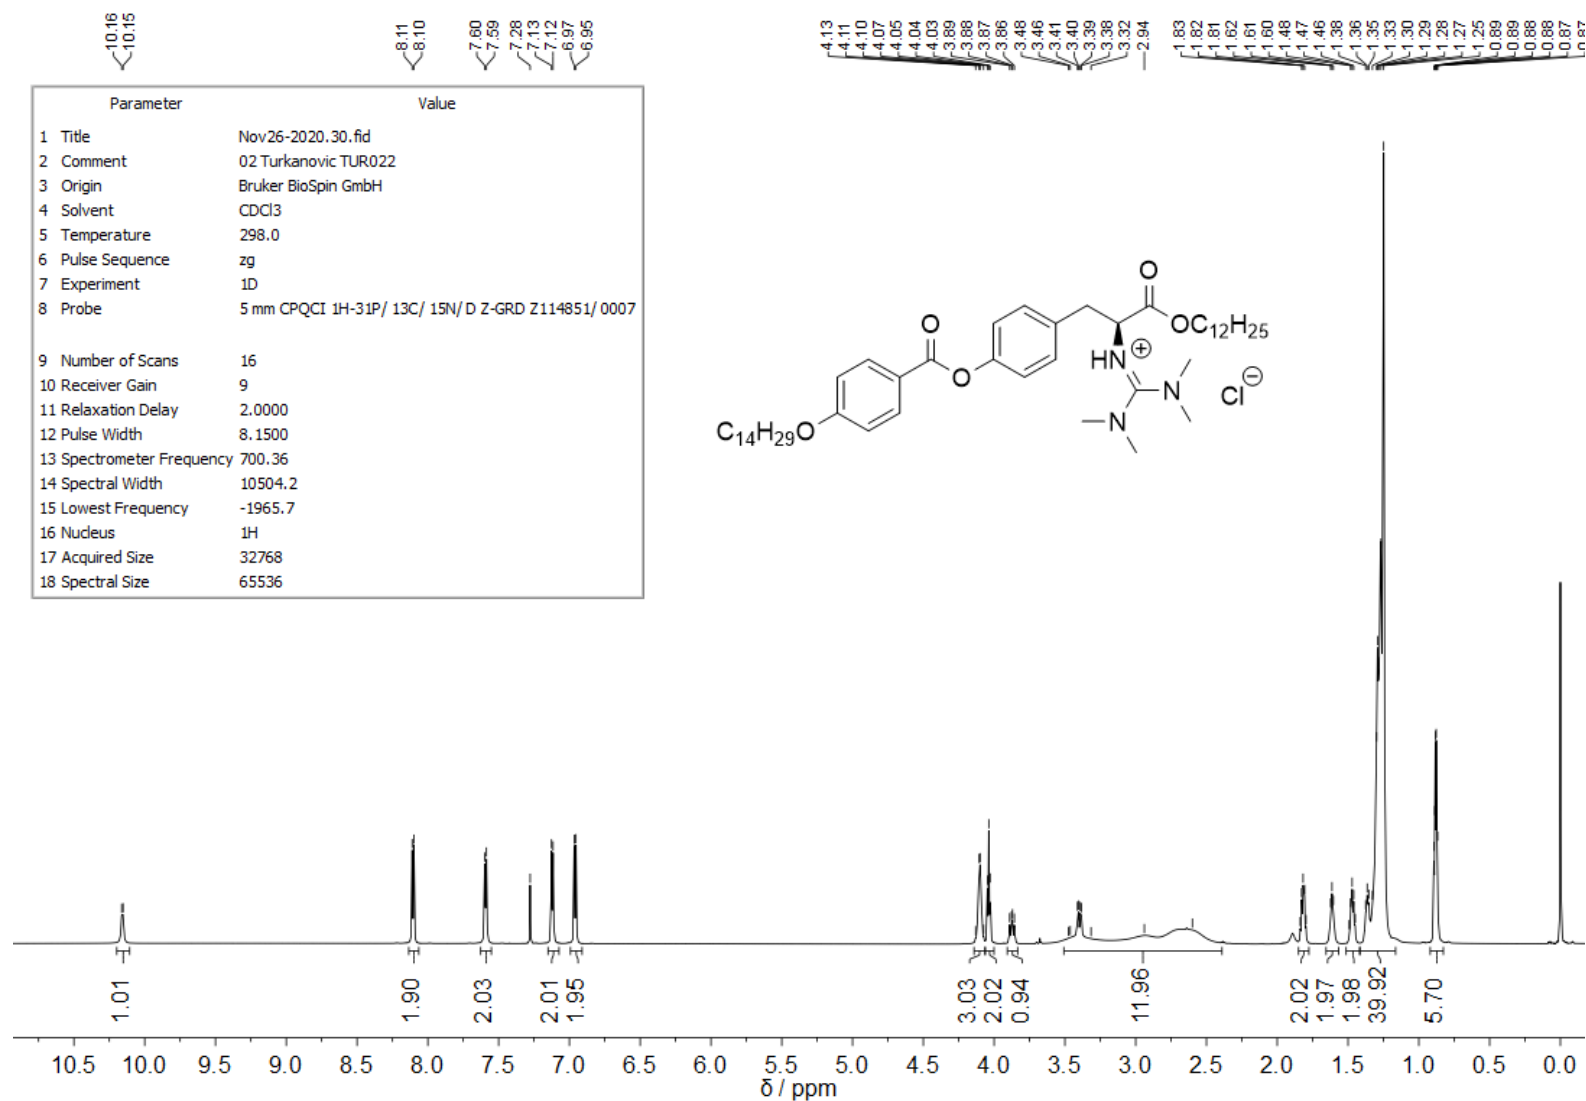

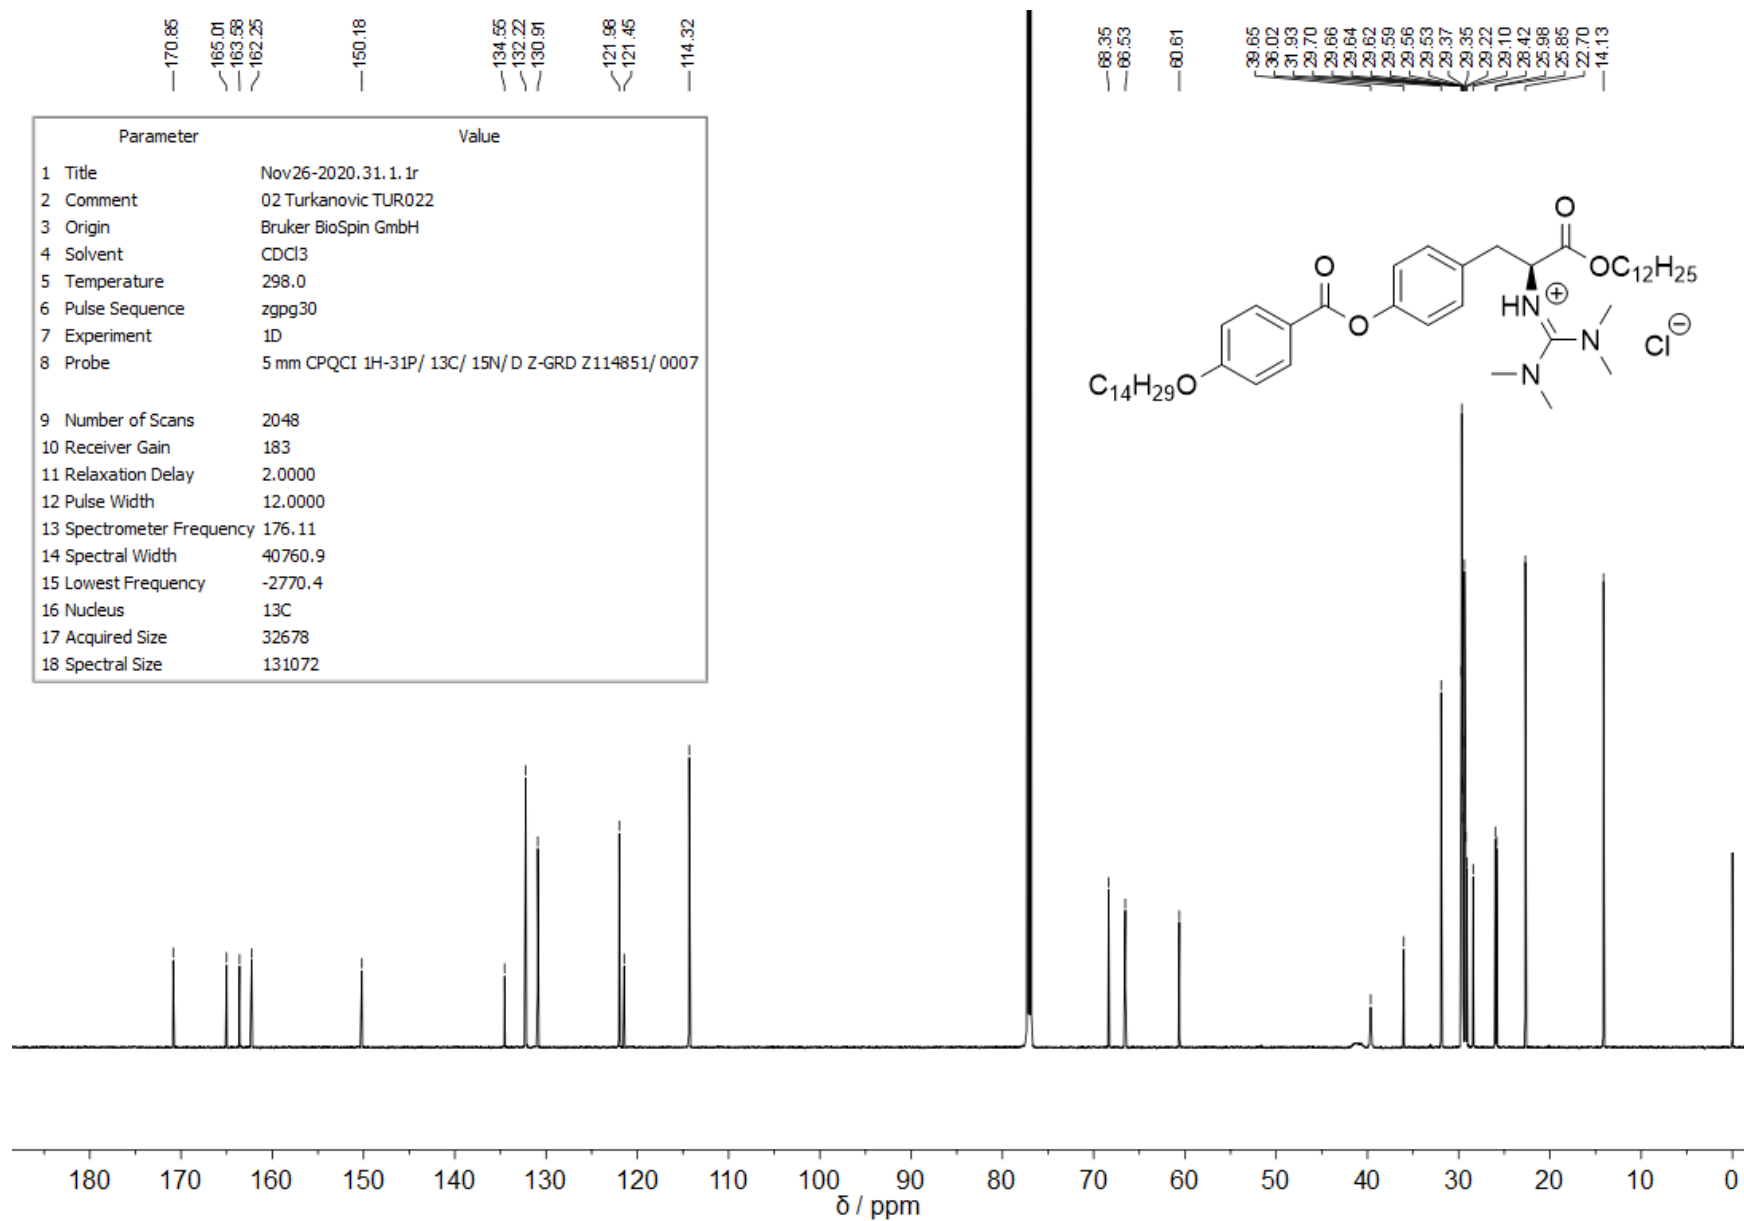

4-C<sub>10</sub>TyrC<sub>14</sub>Cl

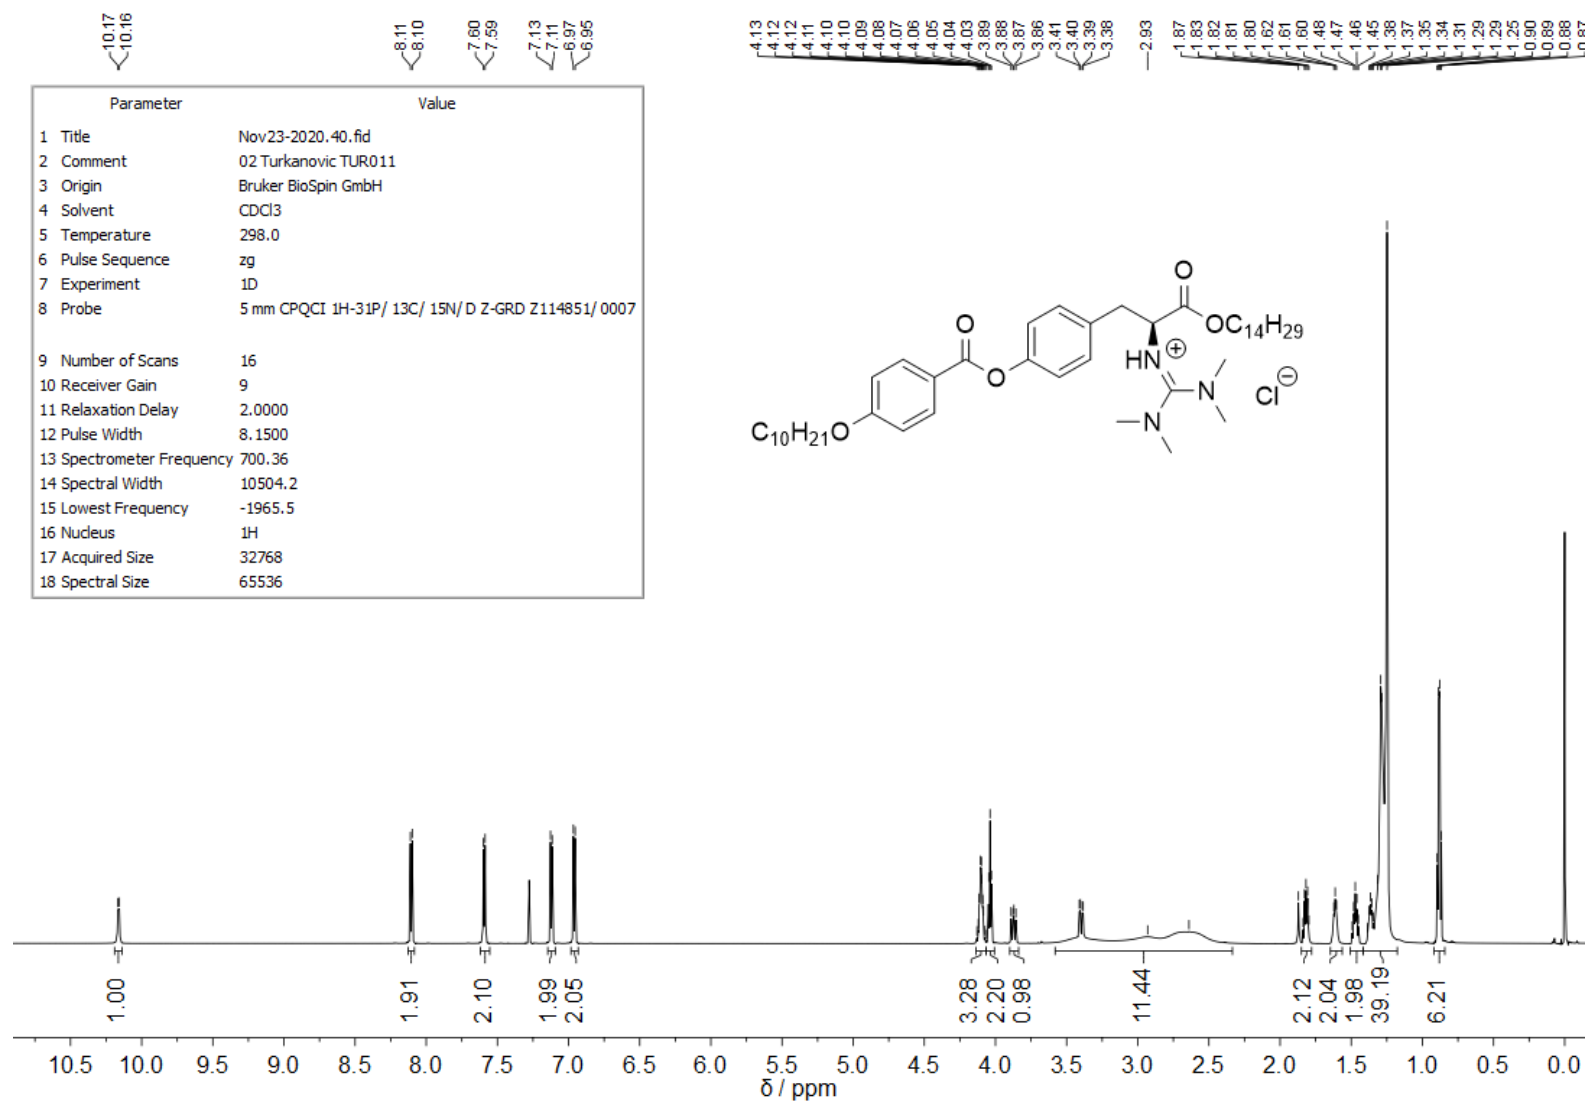



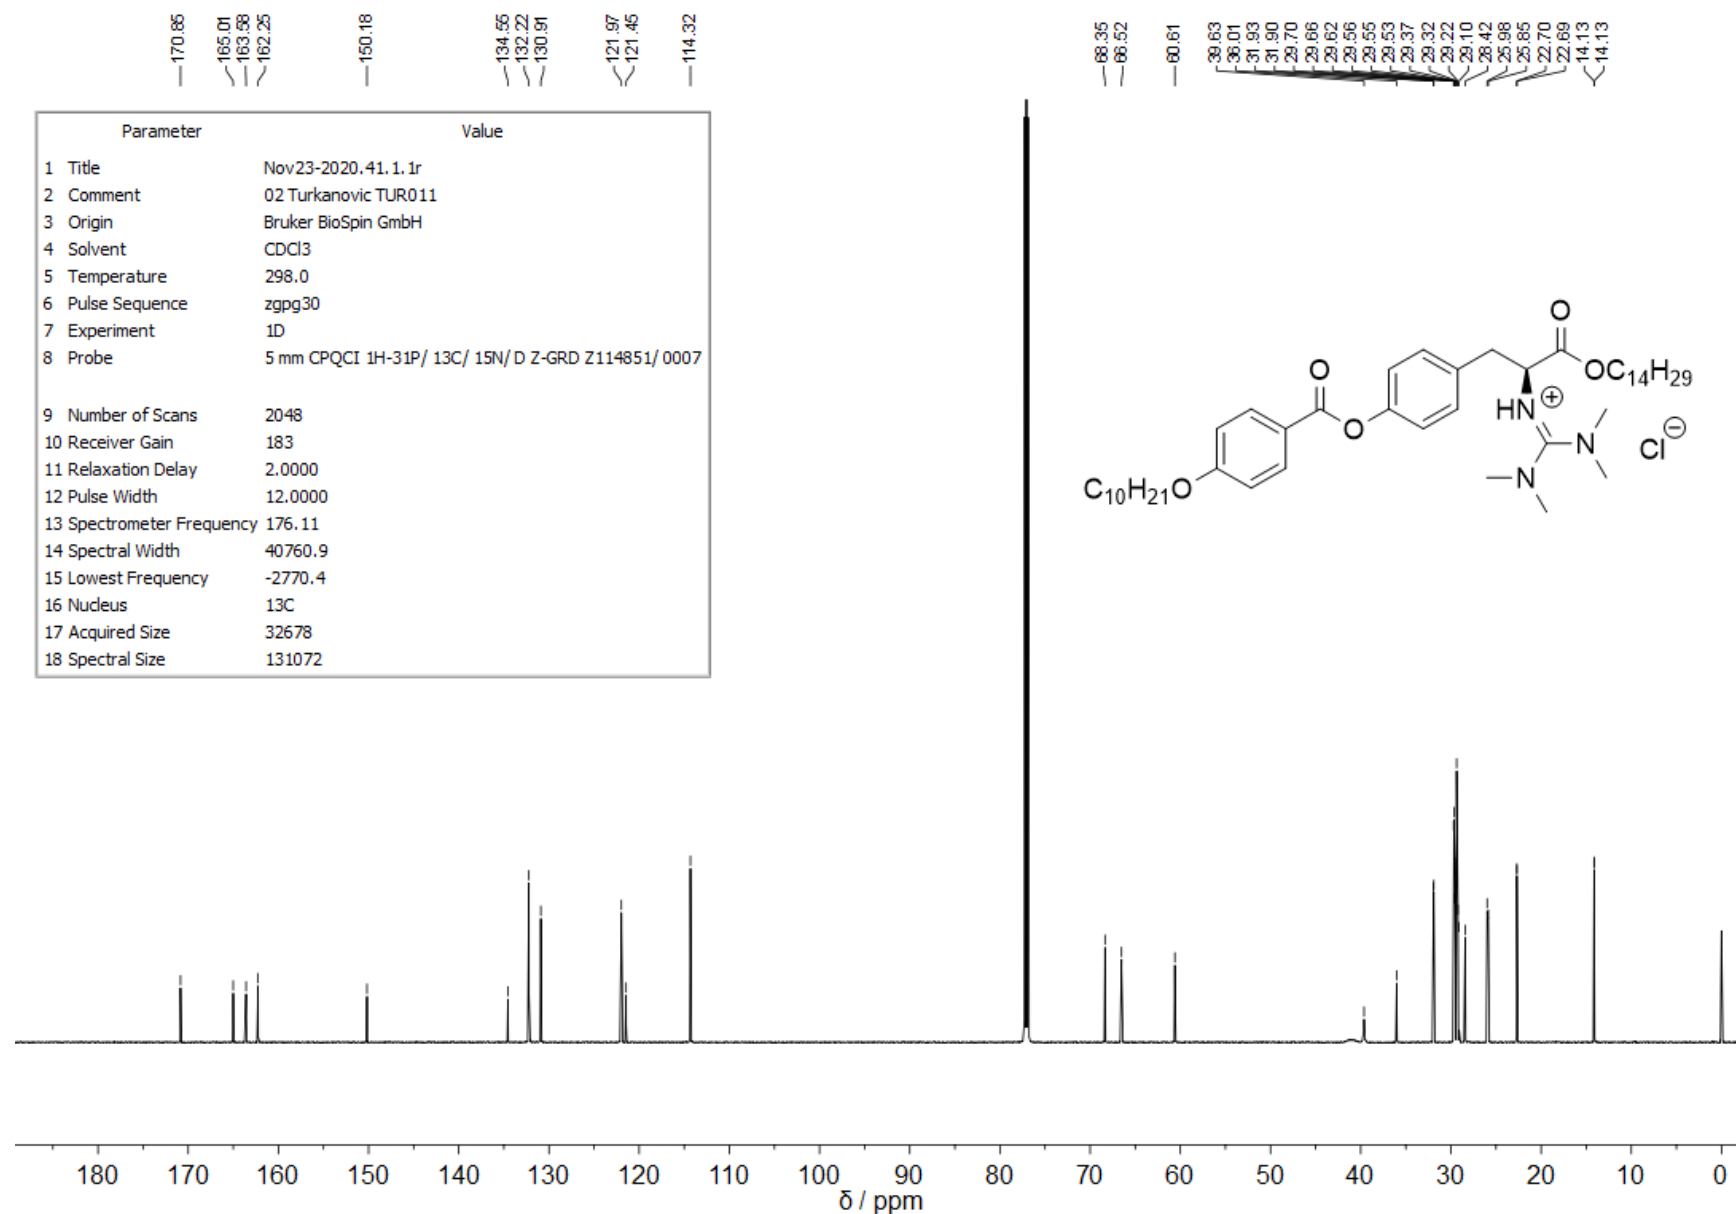

4-C<sub>12</sub>TyrC<sub>14</sub>Cl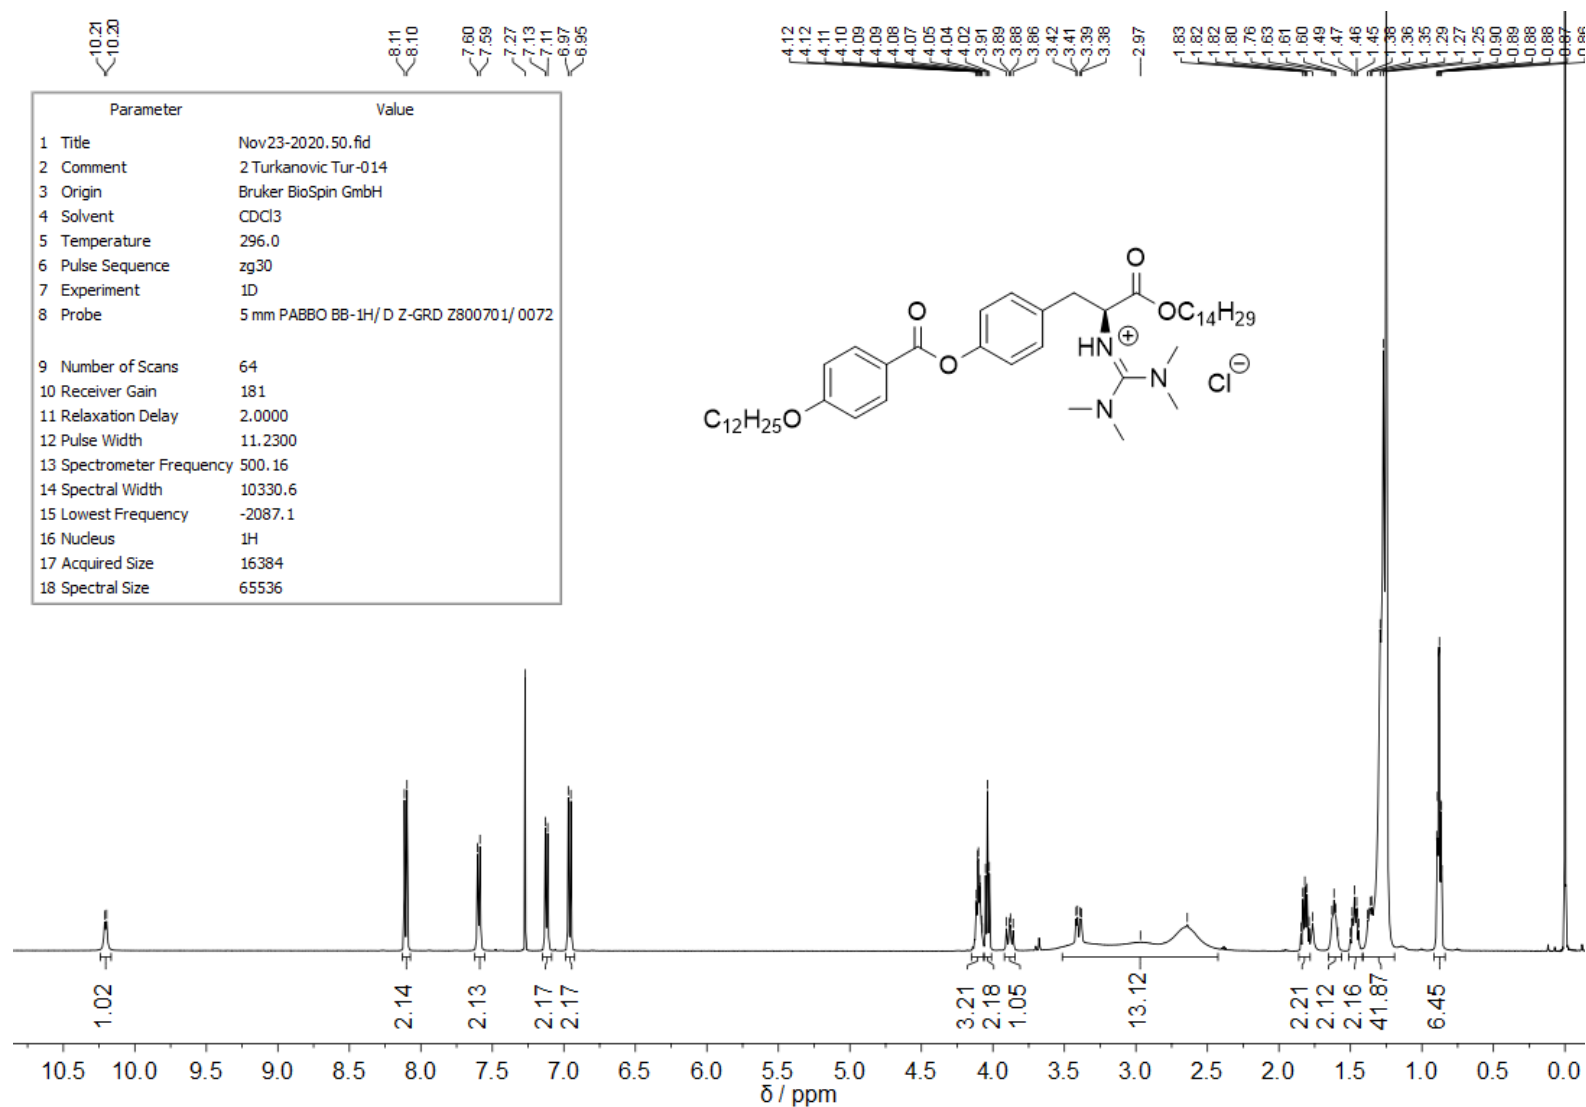

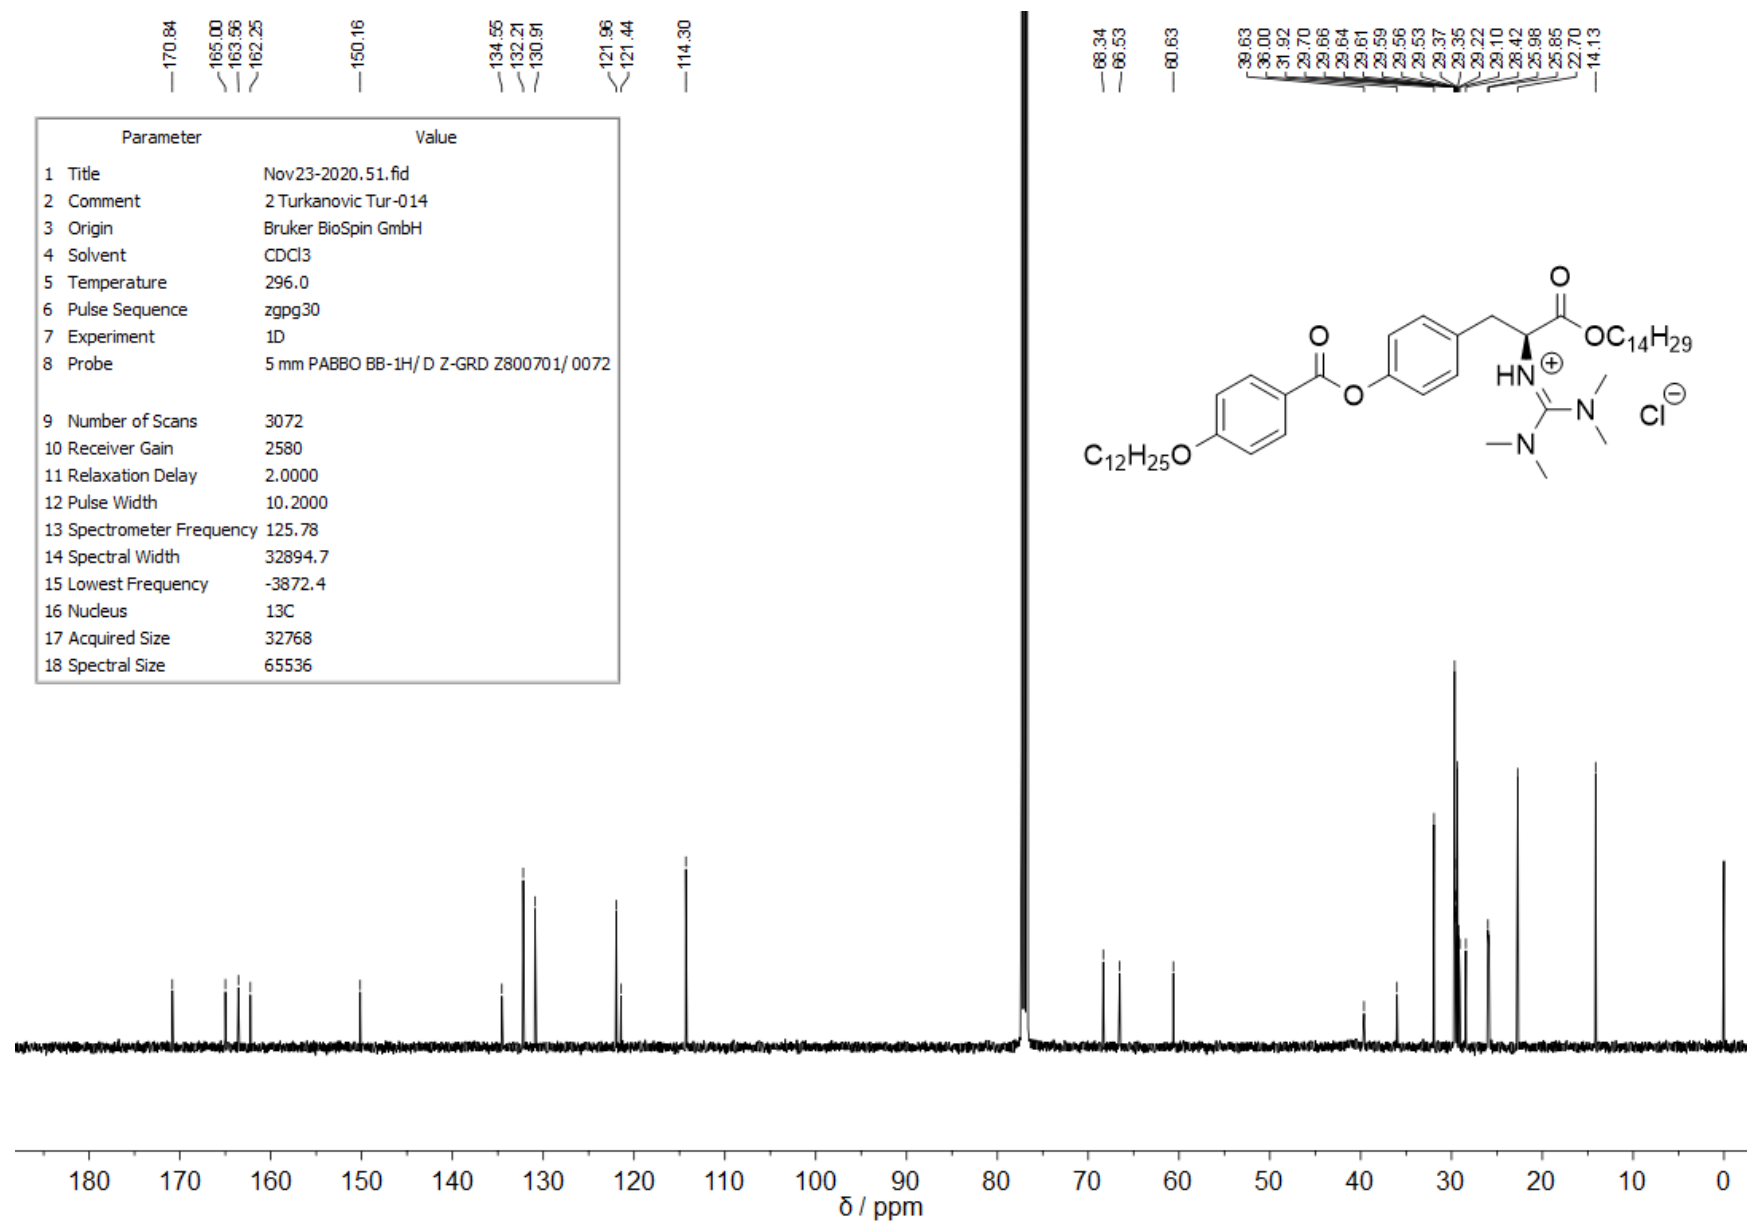

4-C<sub>14</sub>TyrC<sub>14</sub>Cl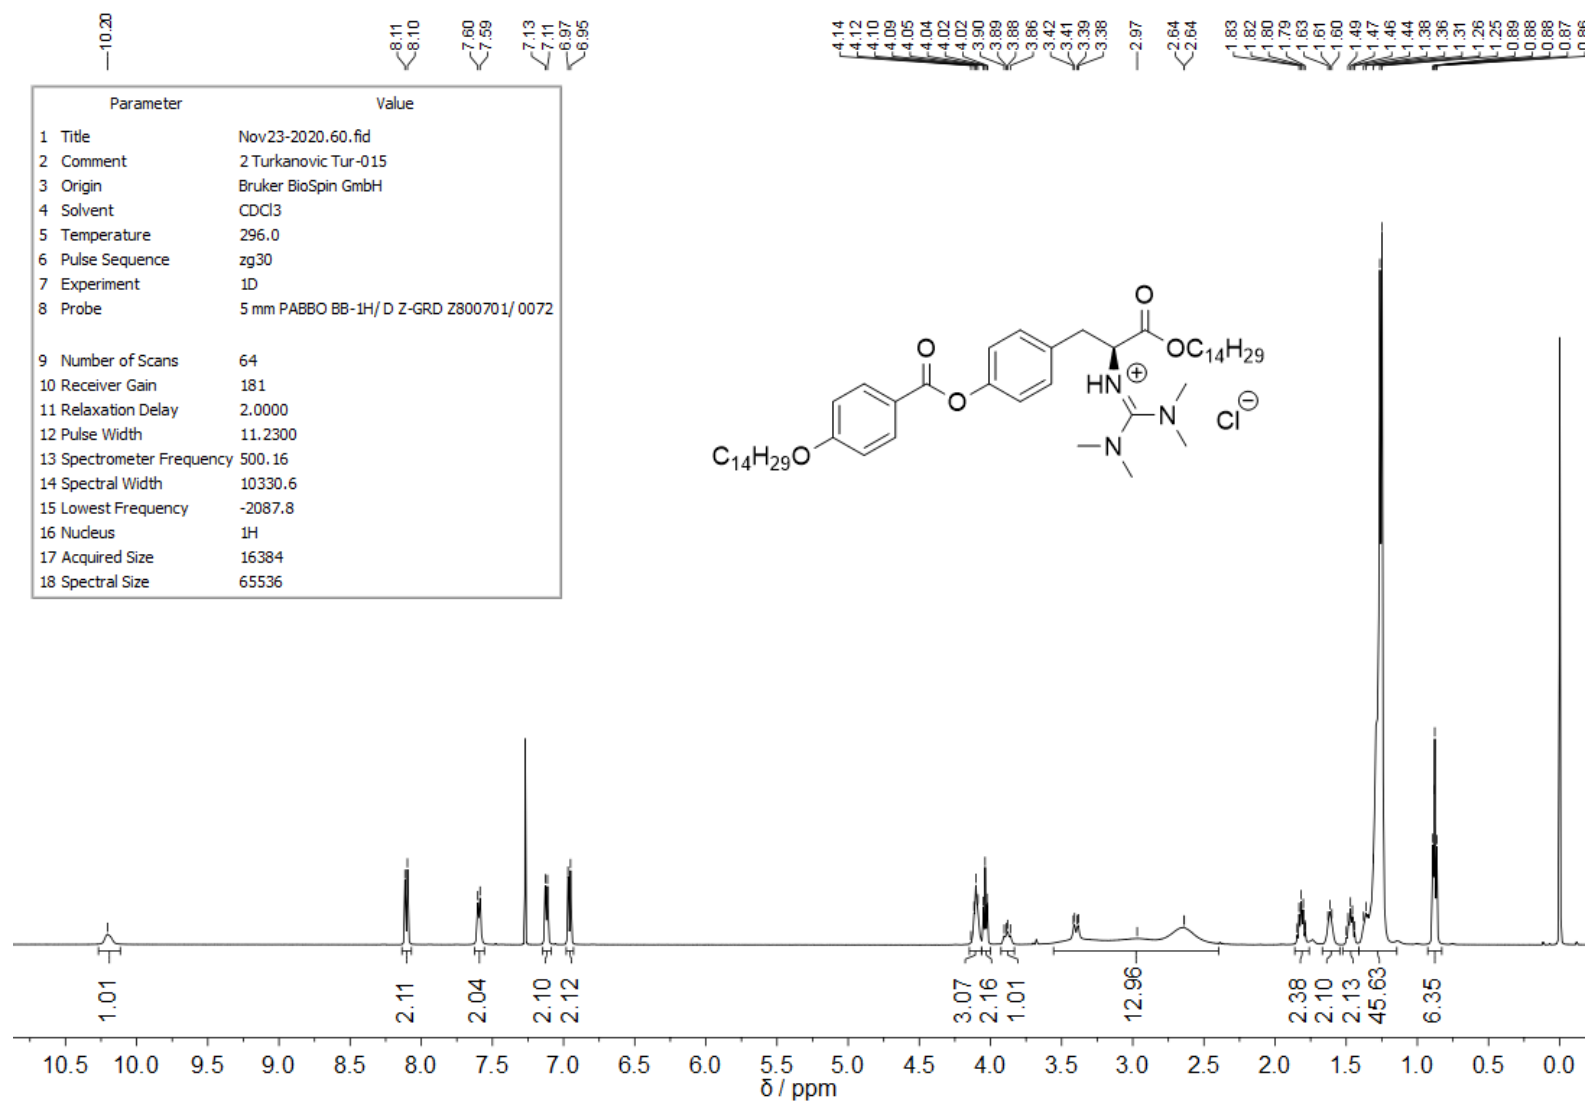

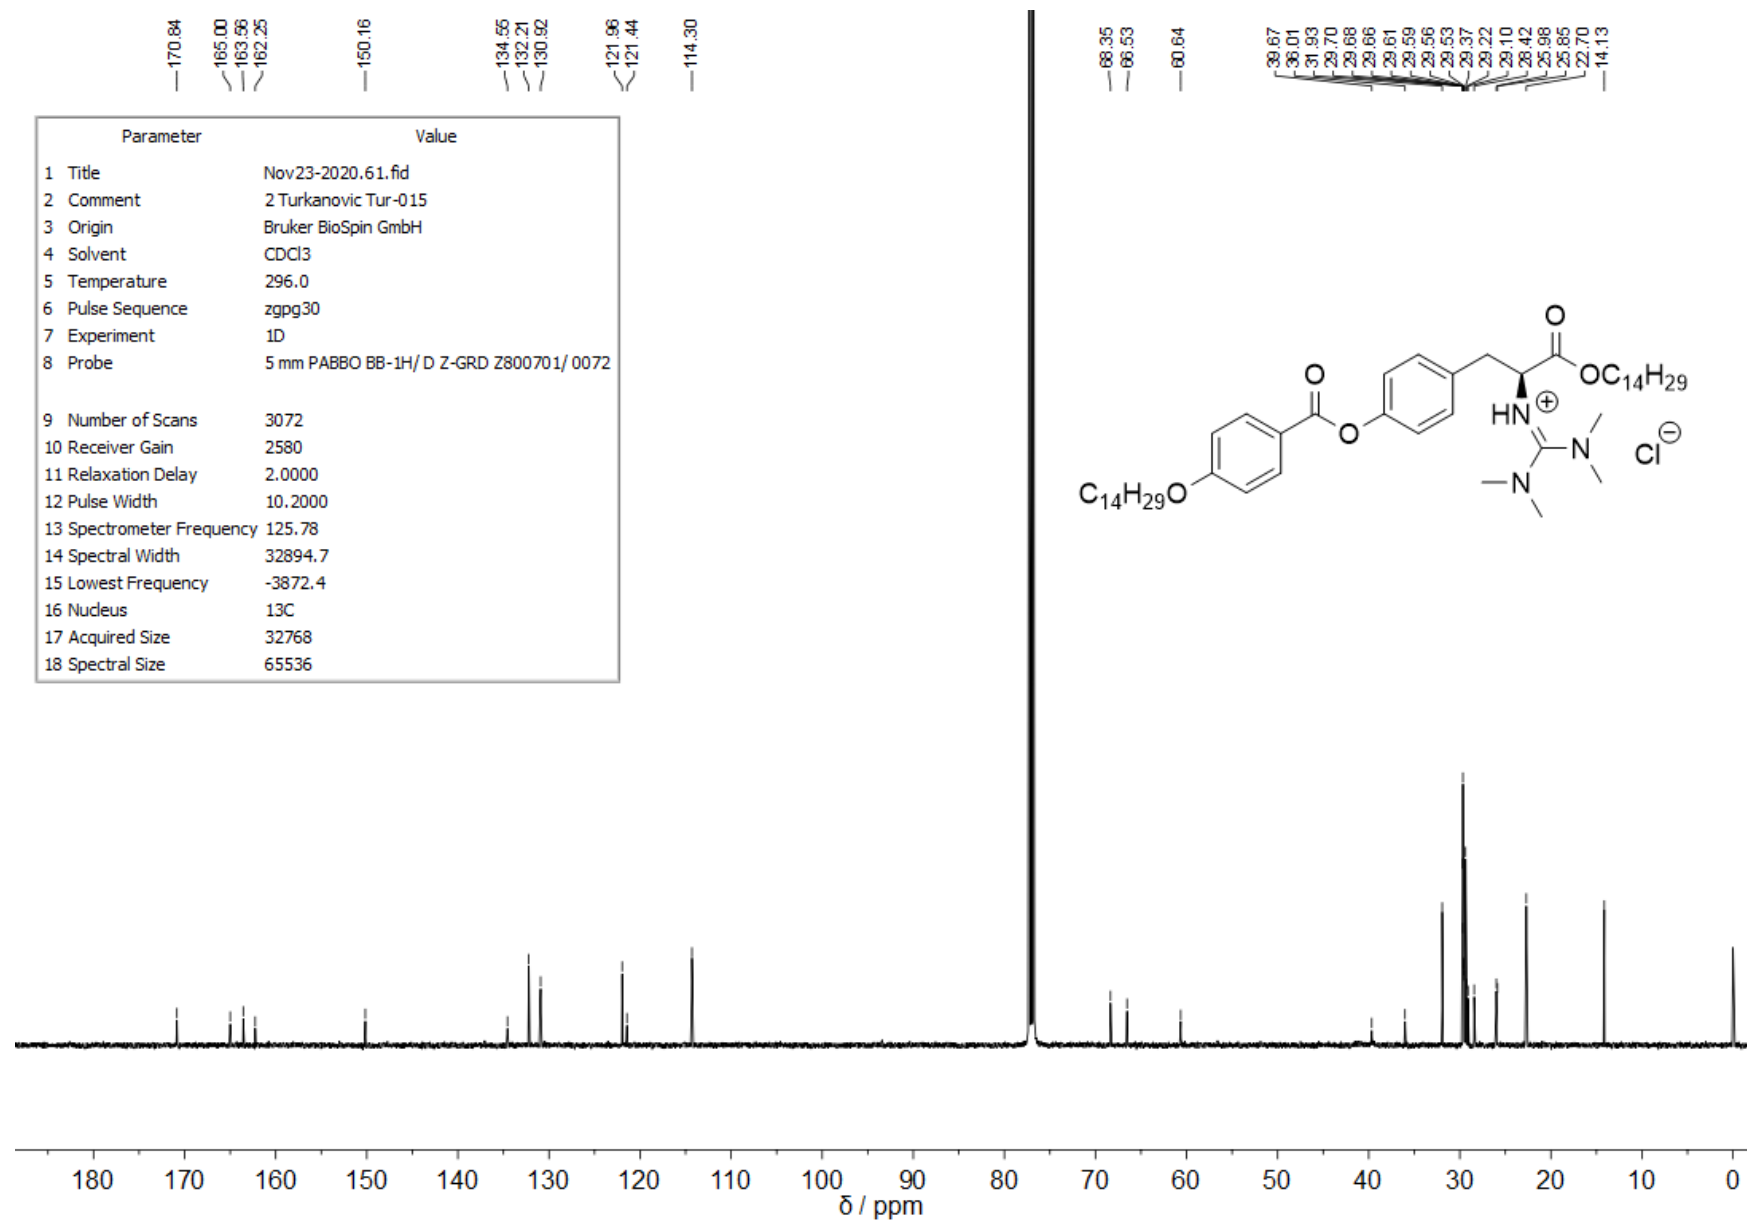

3,4-C<sub>10</sub>TyrC<sub>10</sub>Cl

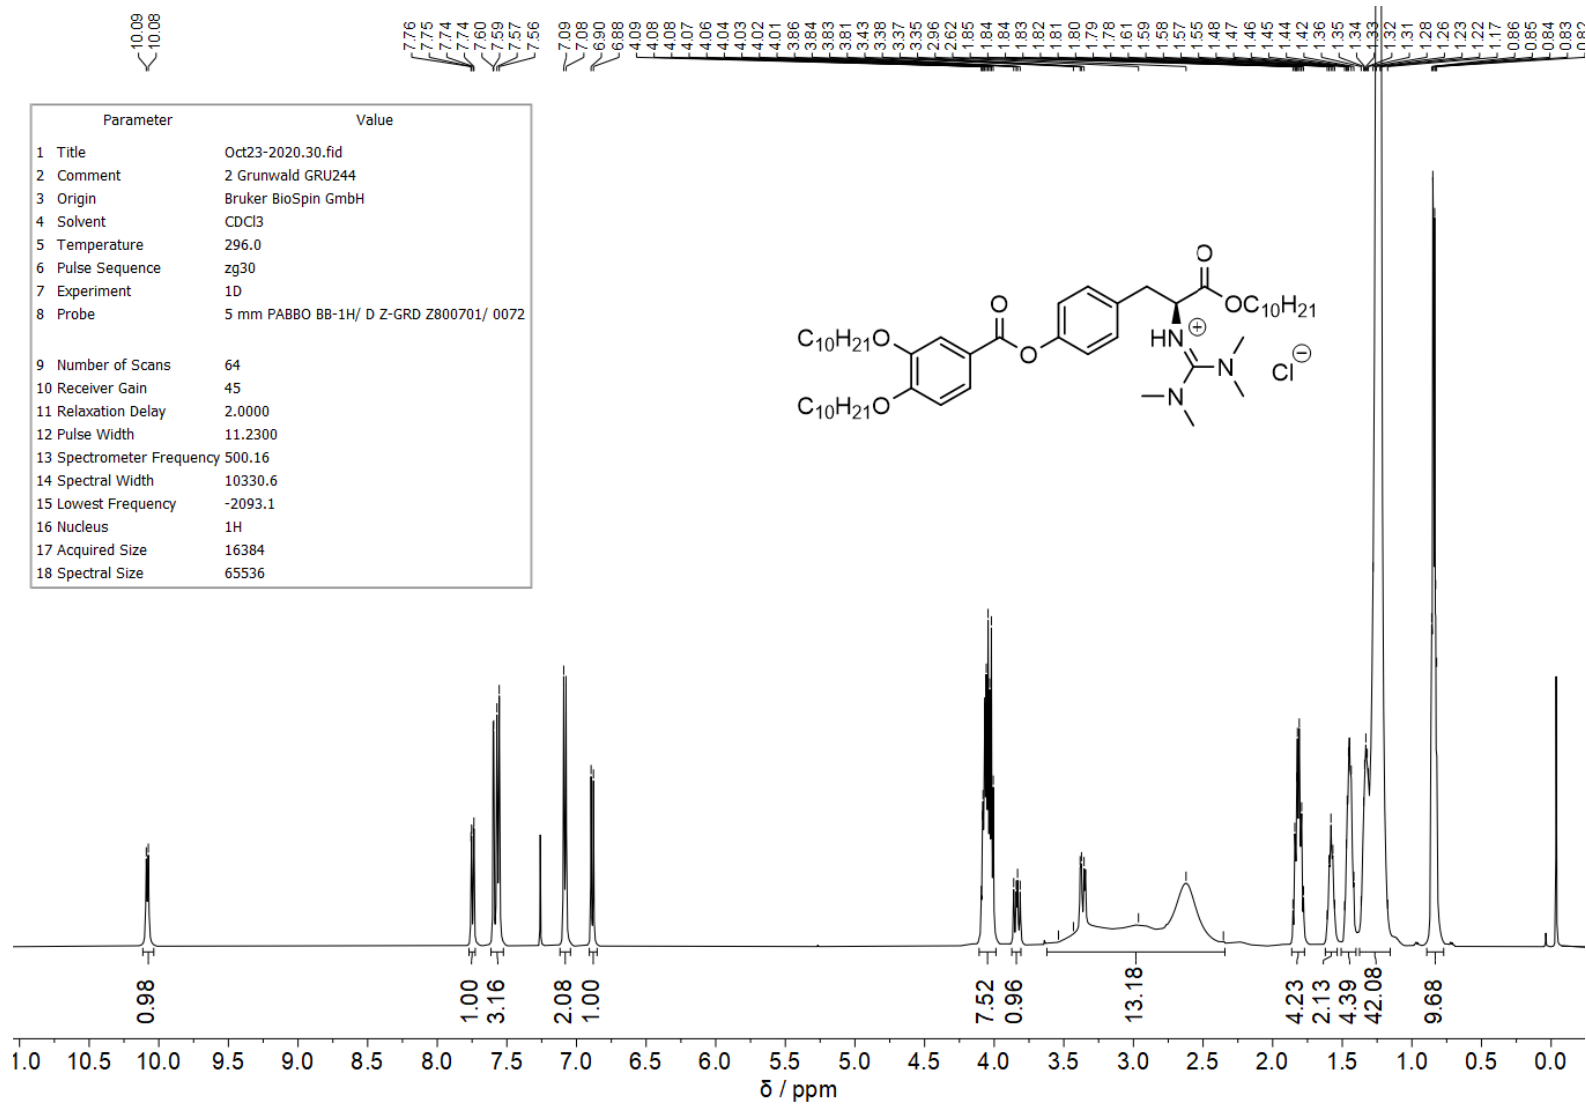

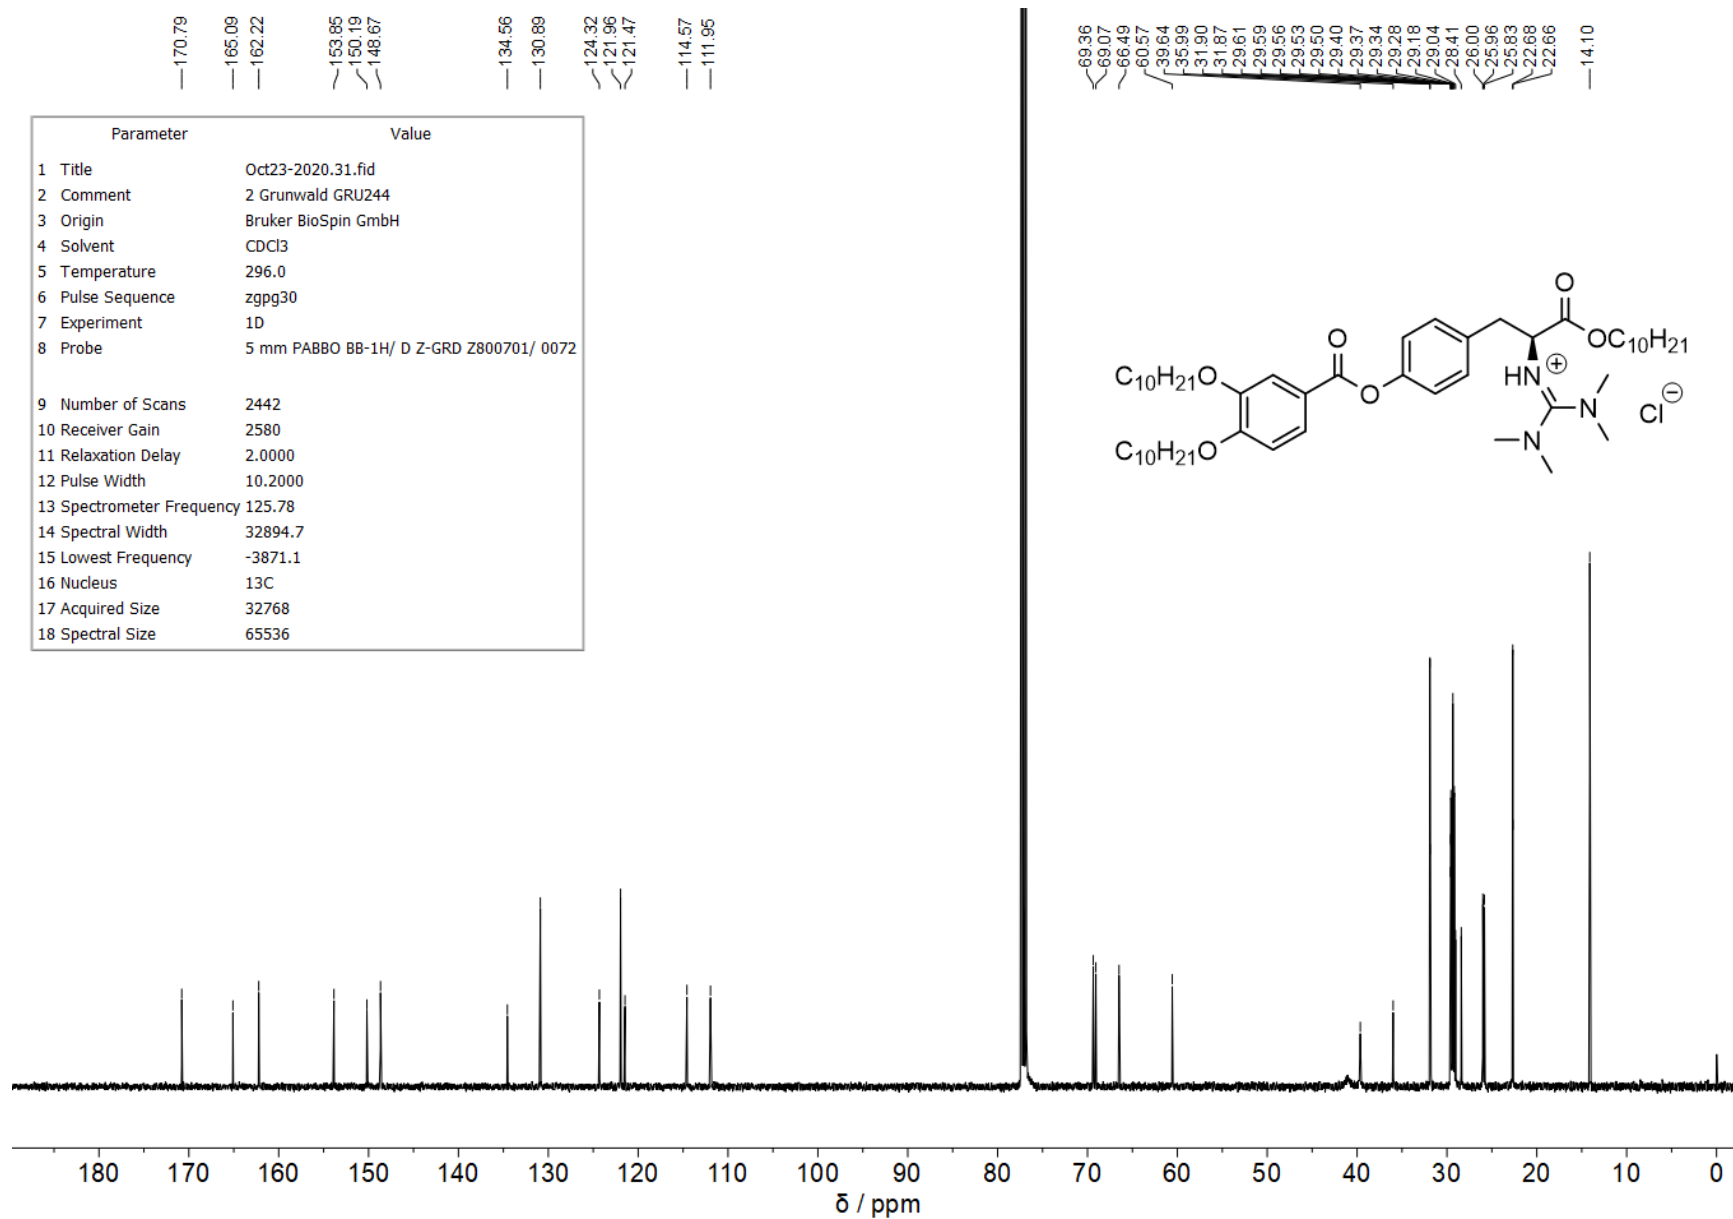

3,4-C<sub>12</sub>TyrC<sub>10</sub>Cl

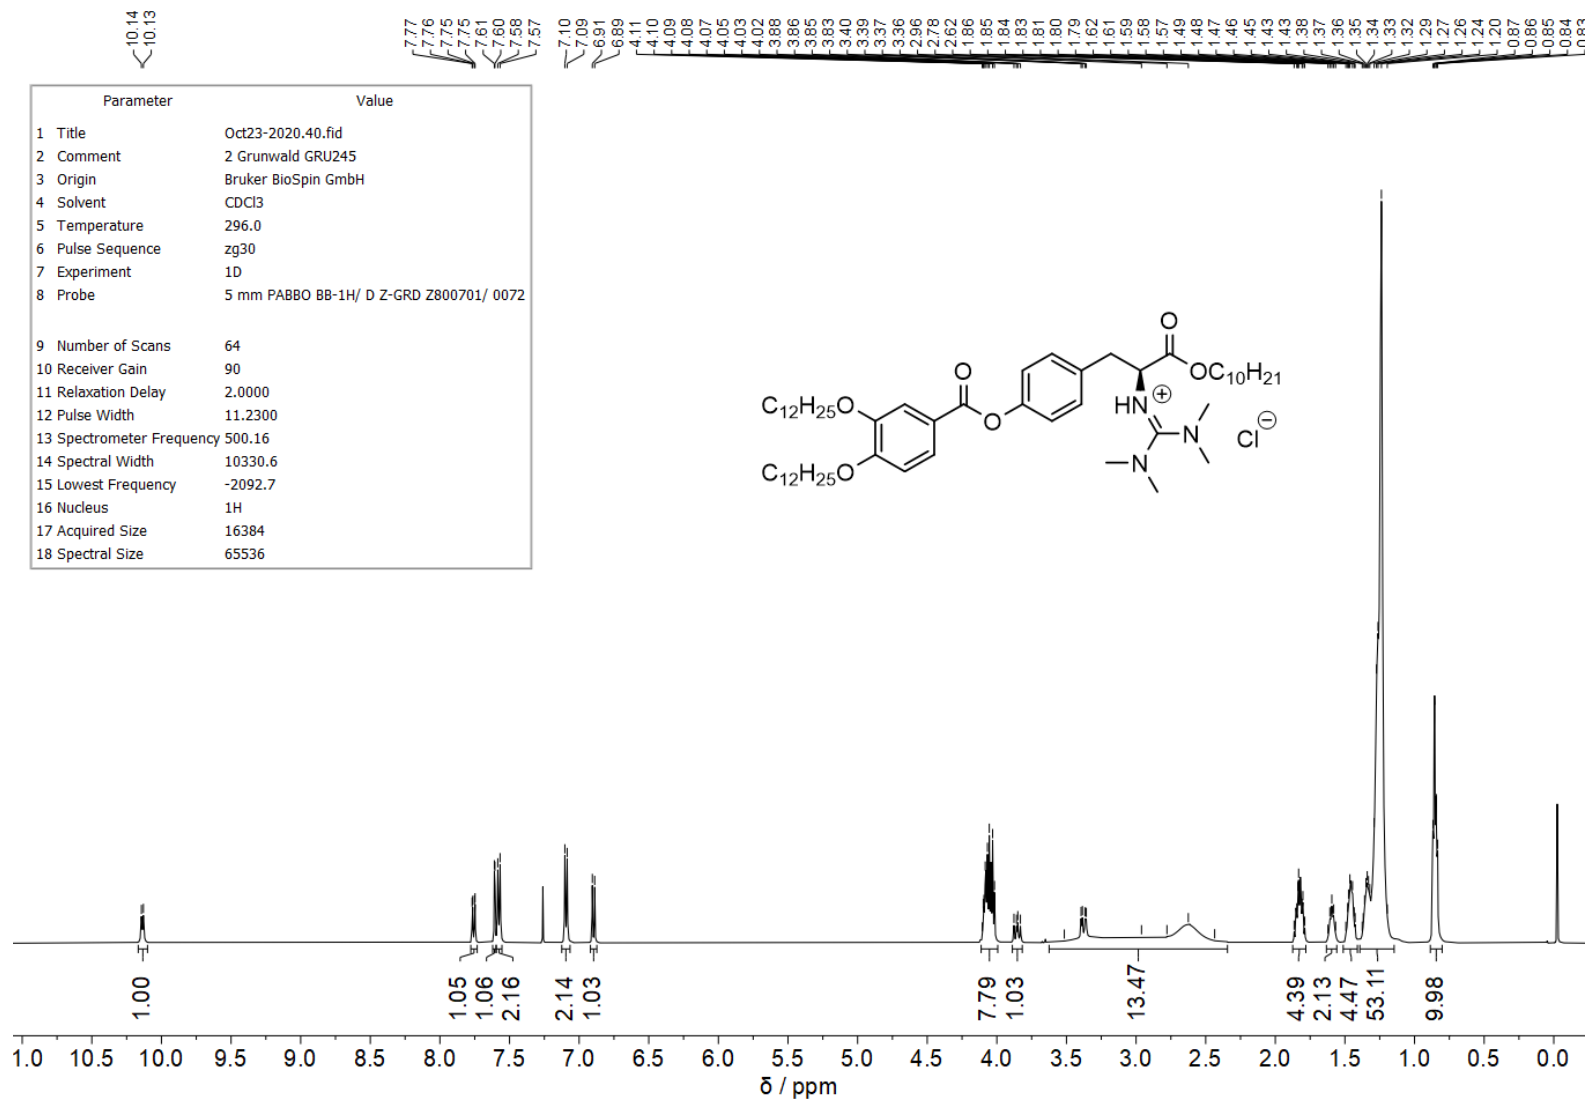



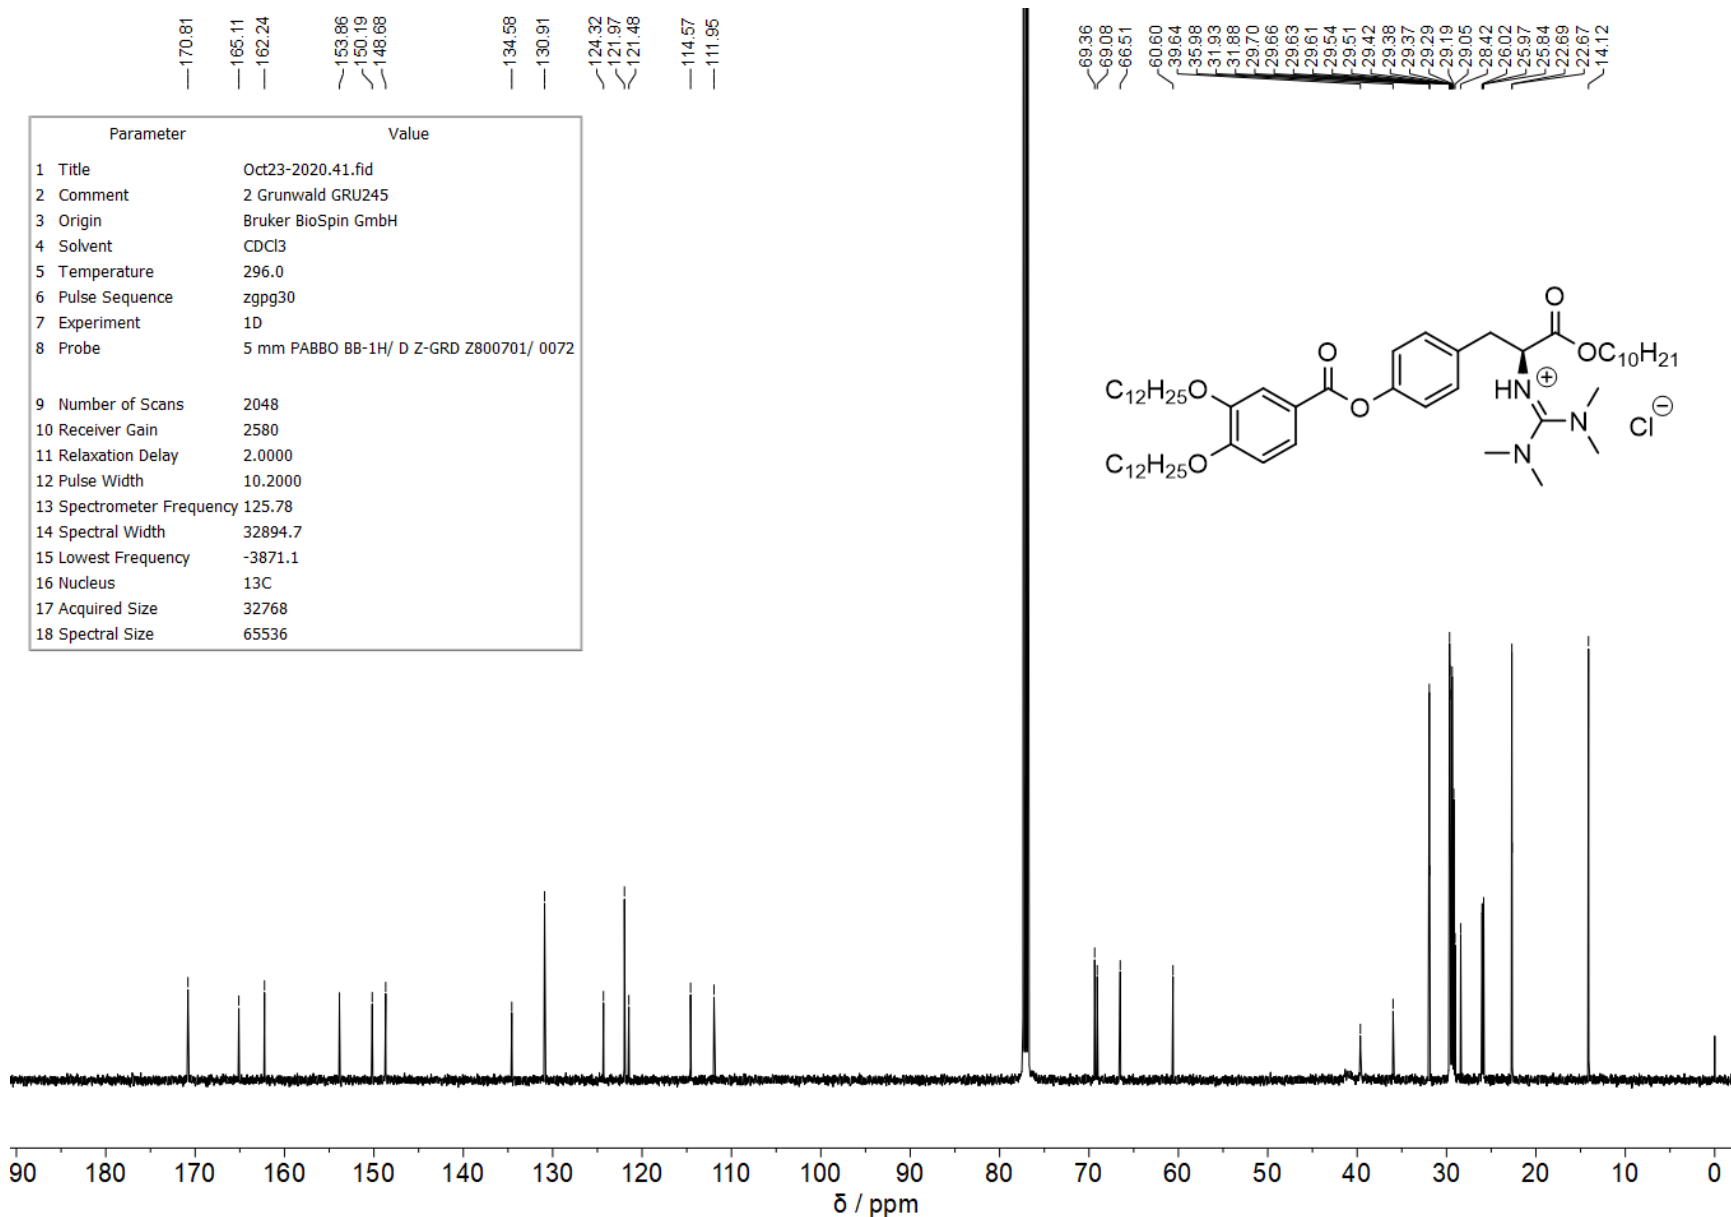

3,4-C<sub>14</sub>TyrC<sub>10</sub>Cl

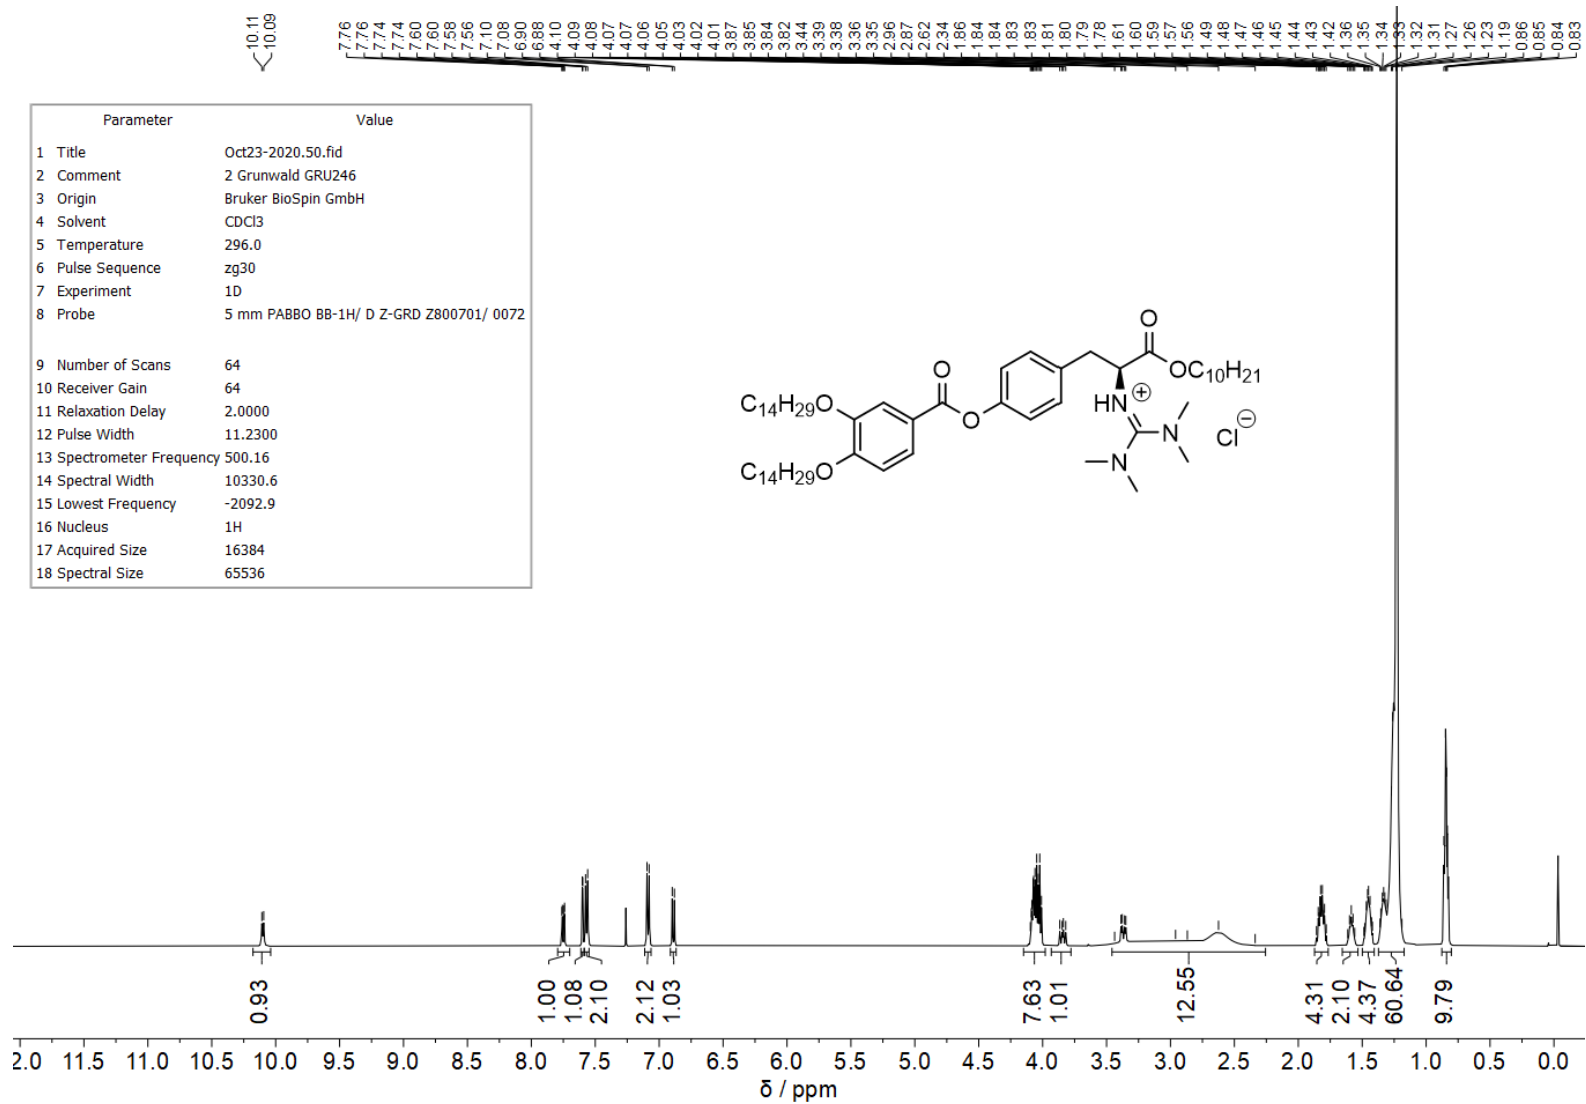

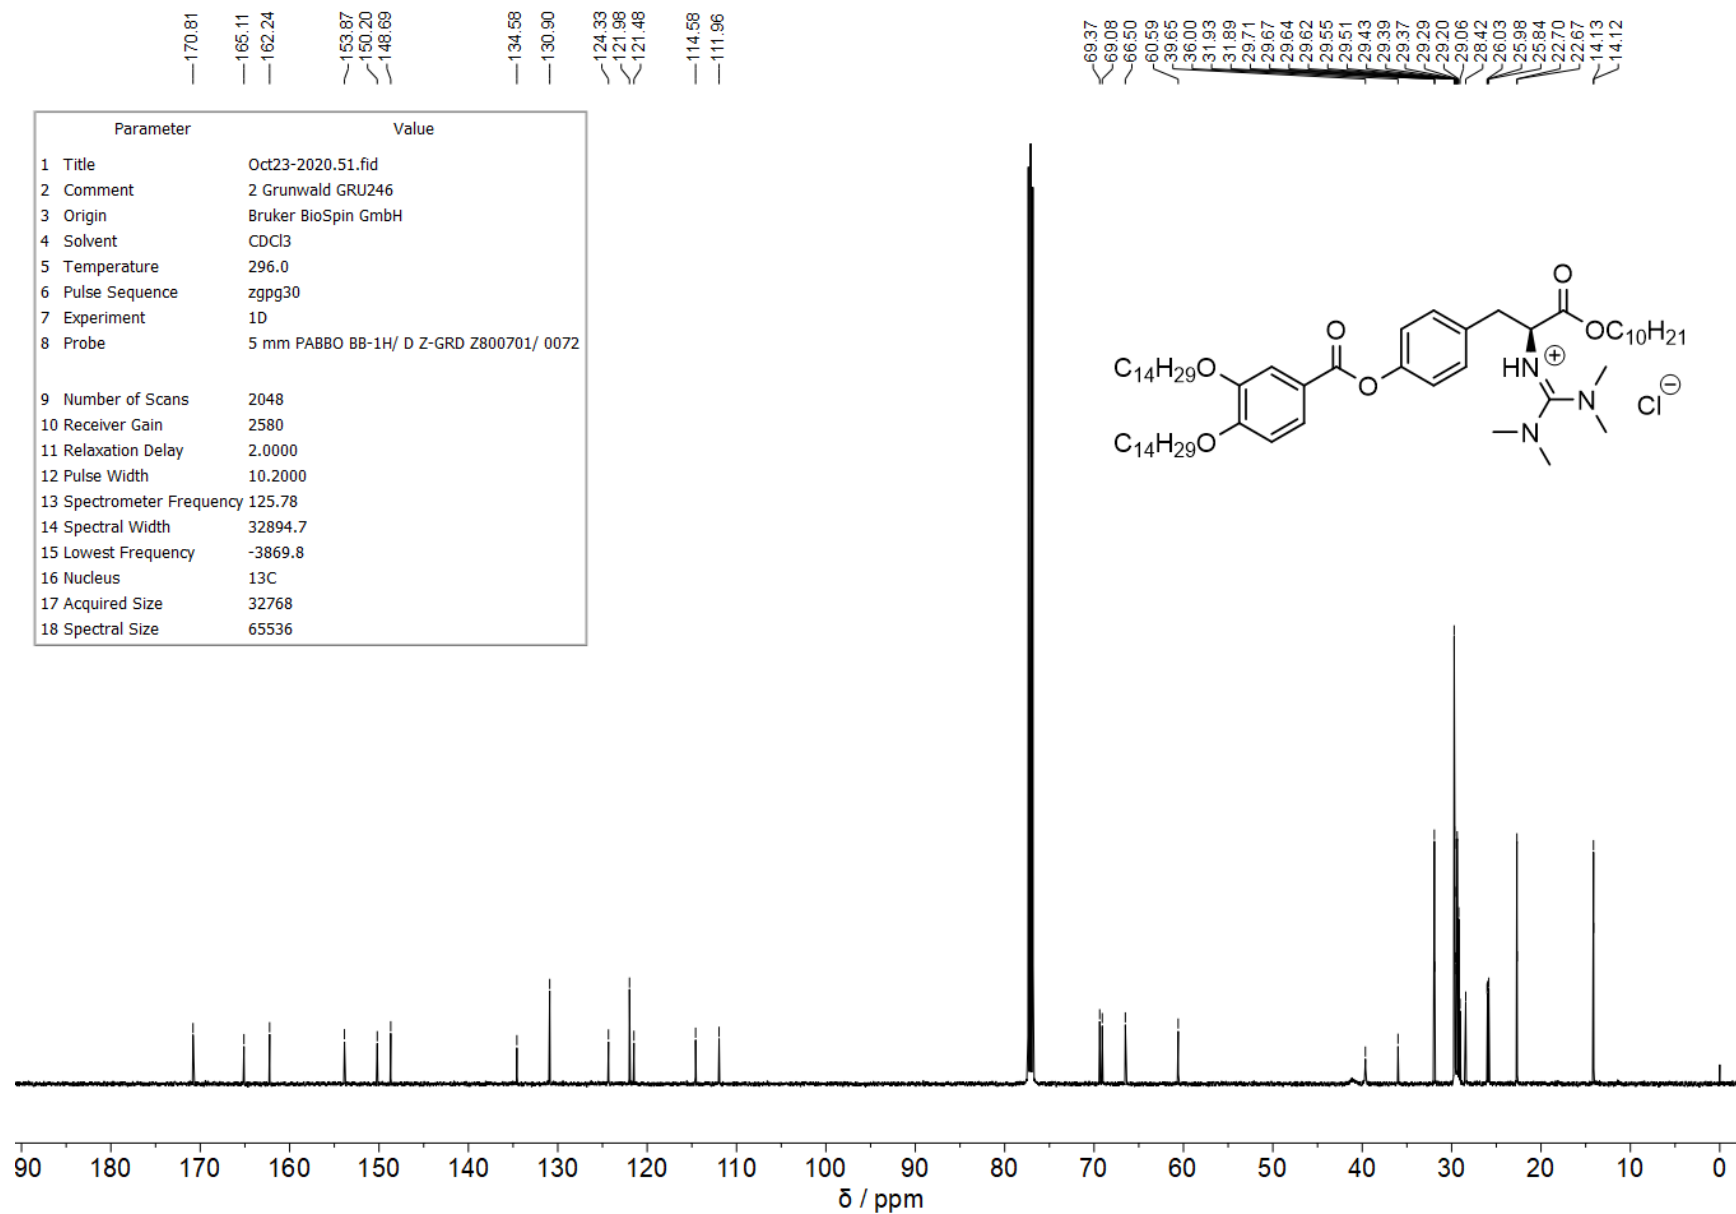

3,4-C<sub>10</sub>TyrC<sub>12</sub>Cl

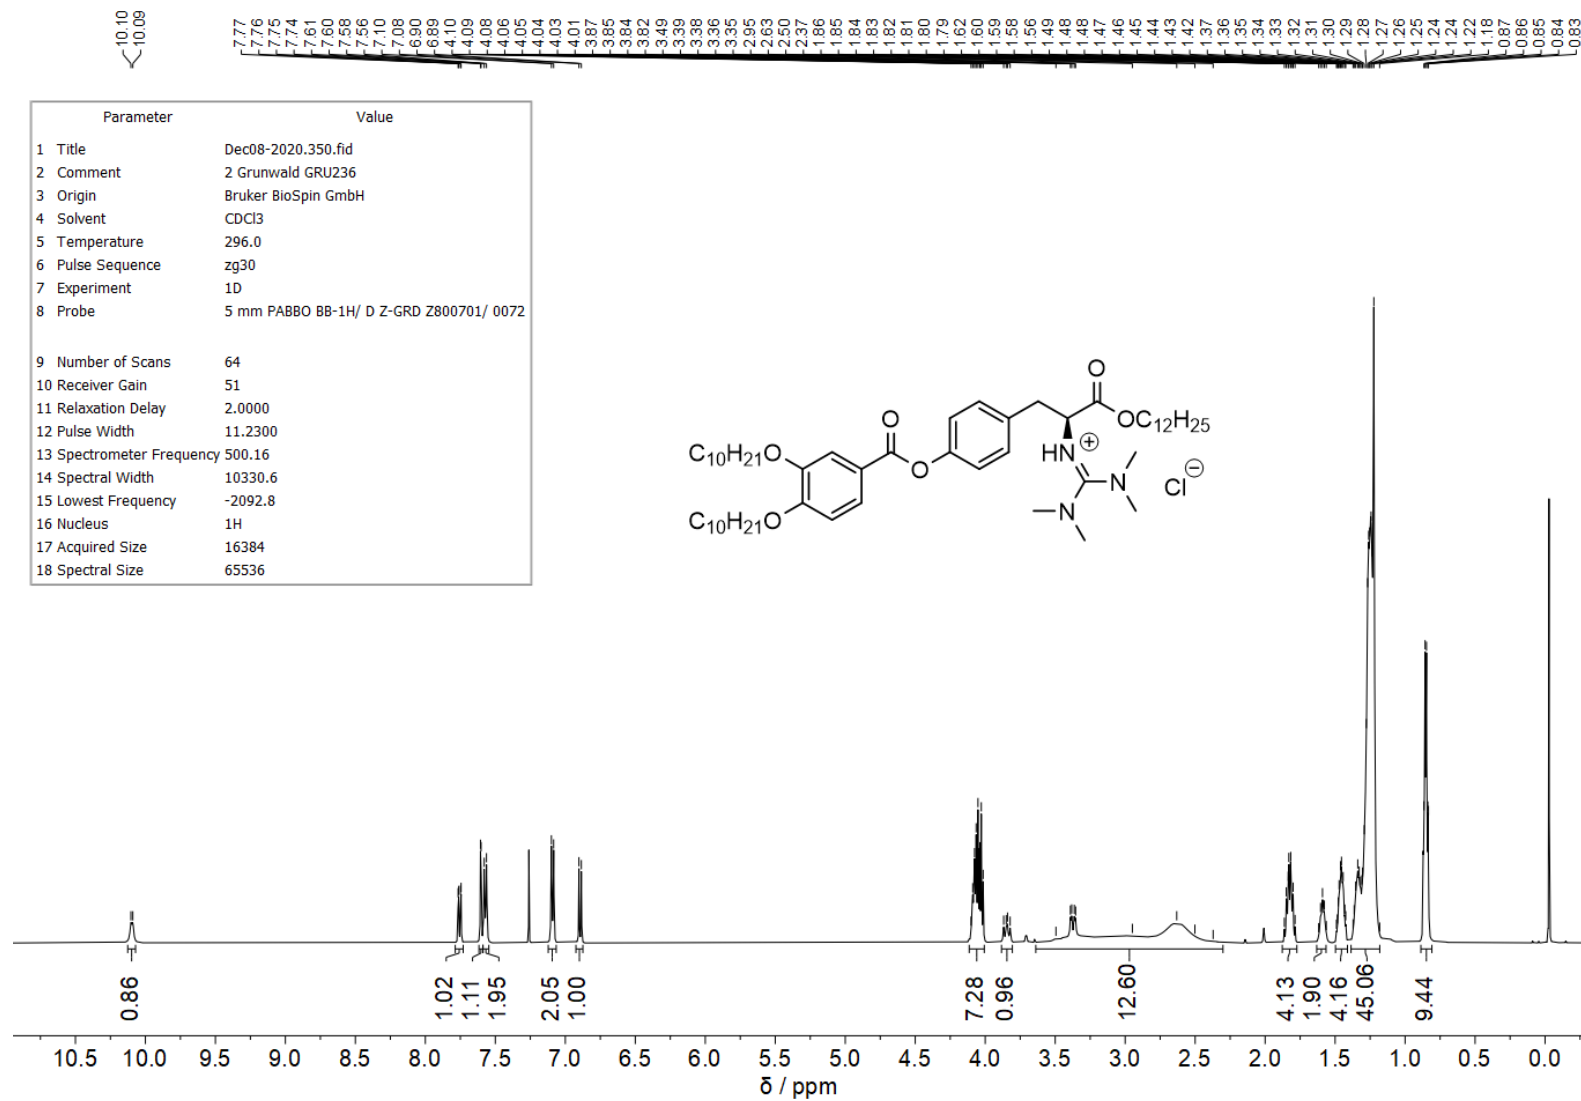

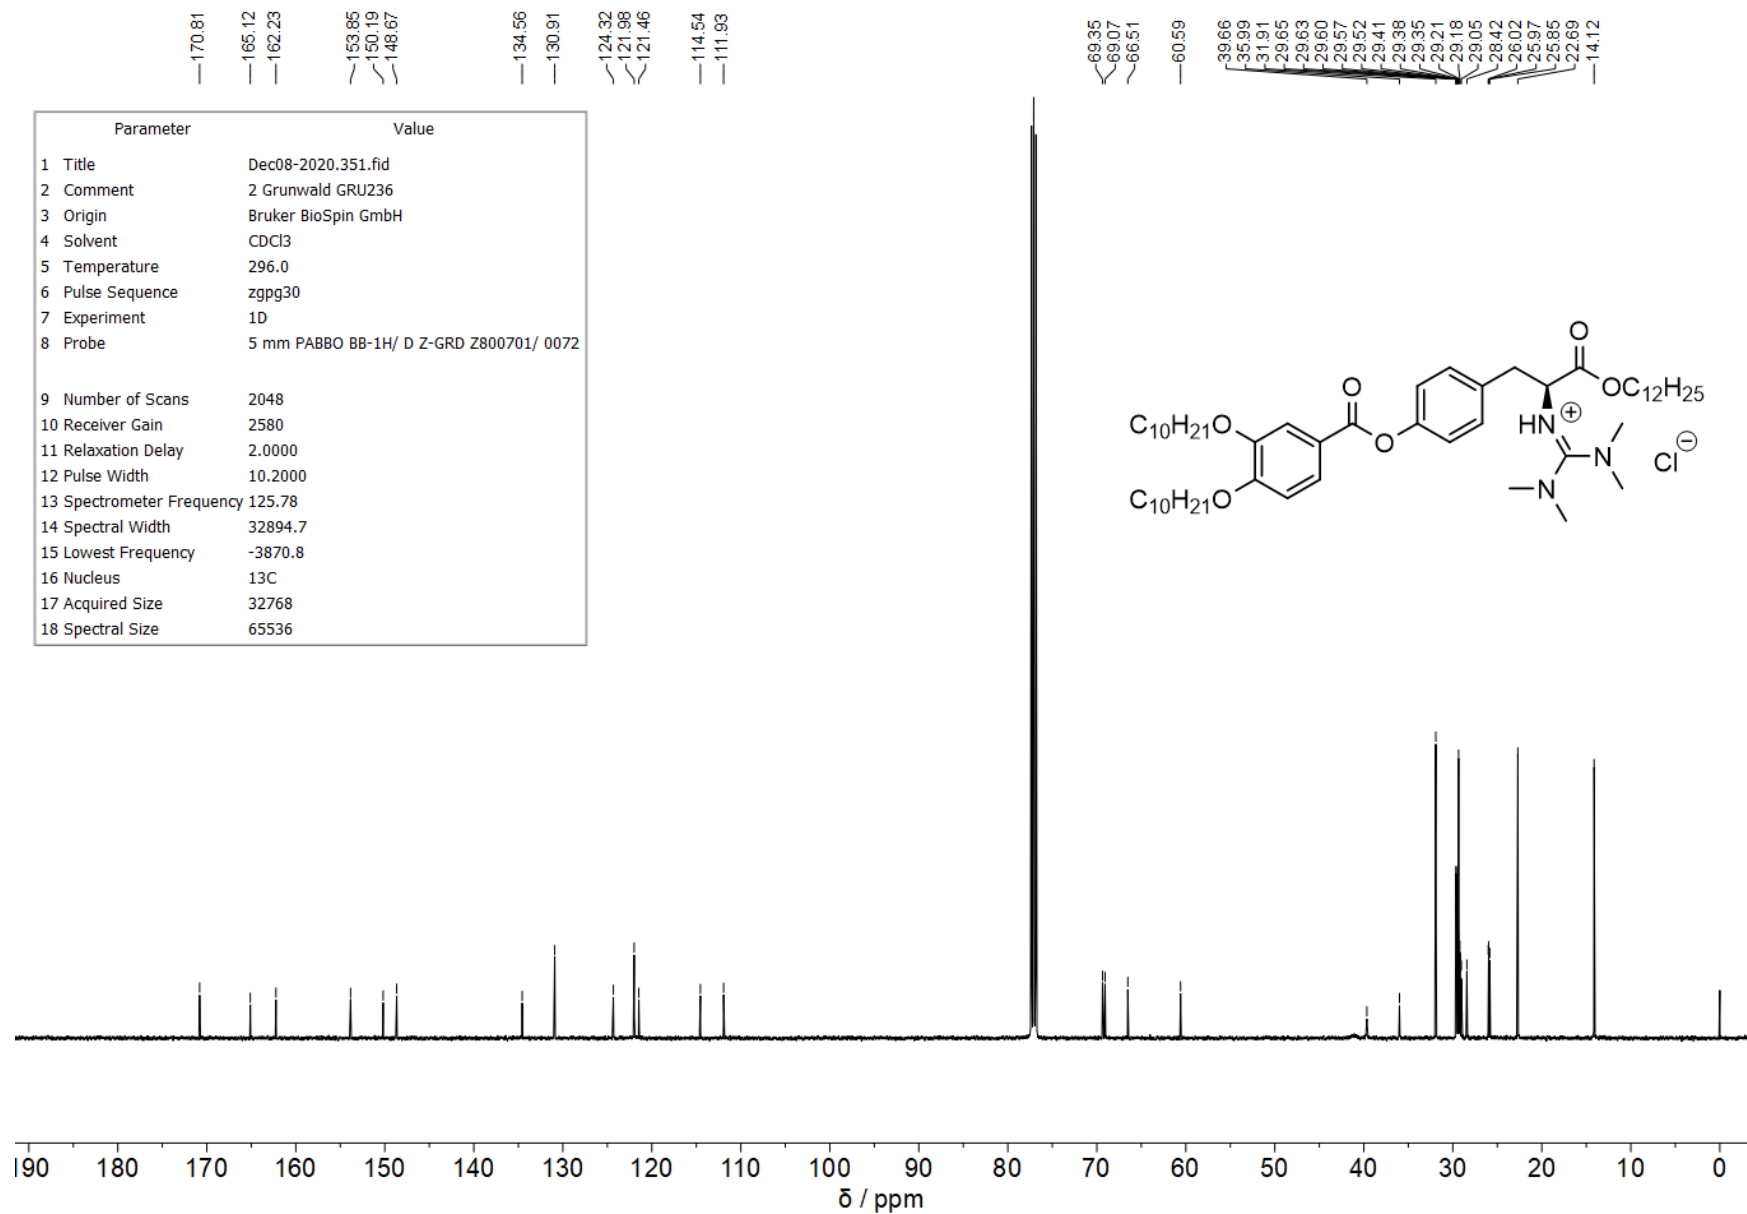

3,4-C12TyrC12Cl

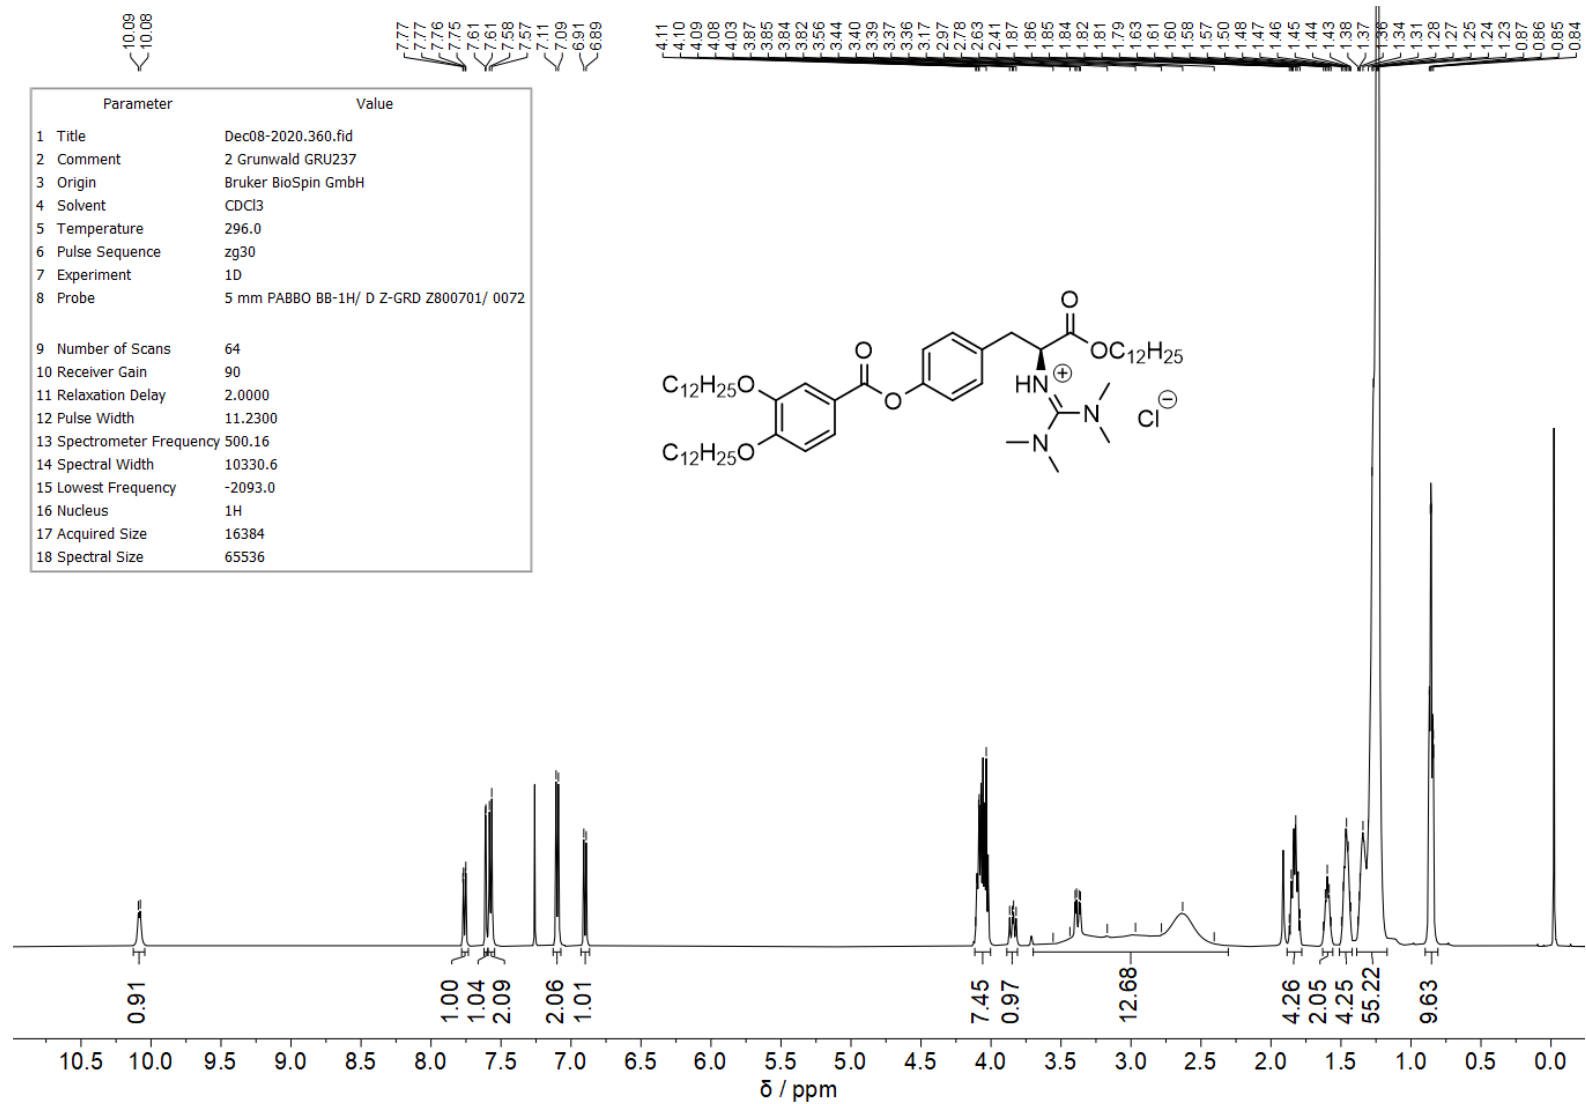

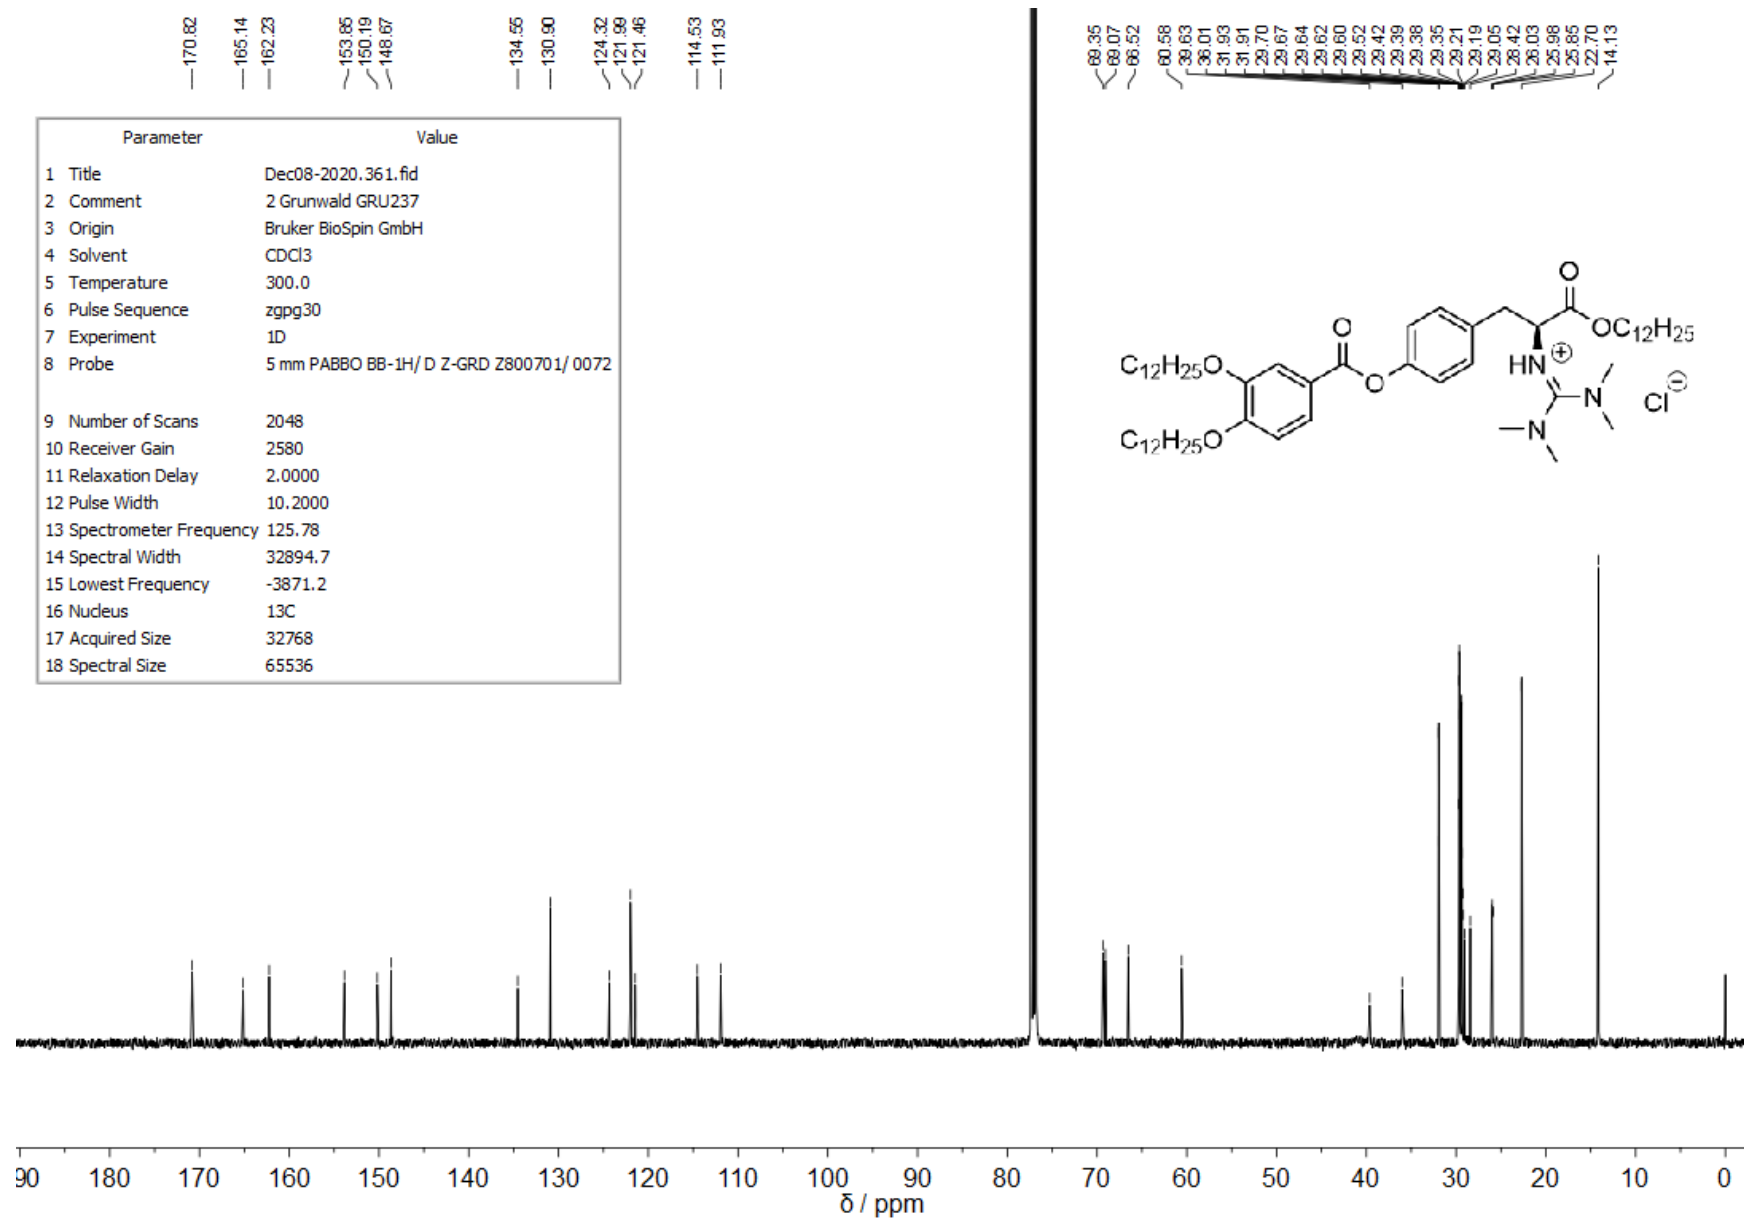

3,4-C<sub>14</sub>TyrC<sub>12</sub>Cl

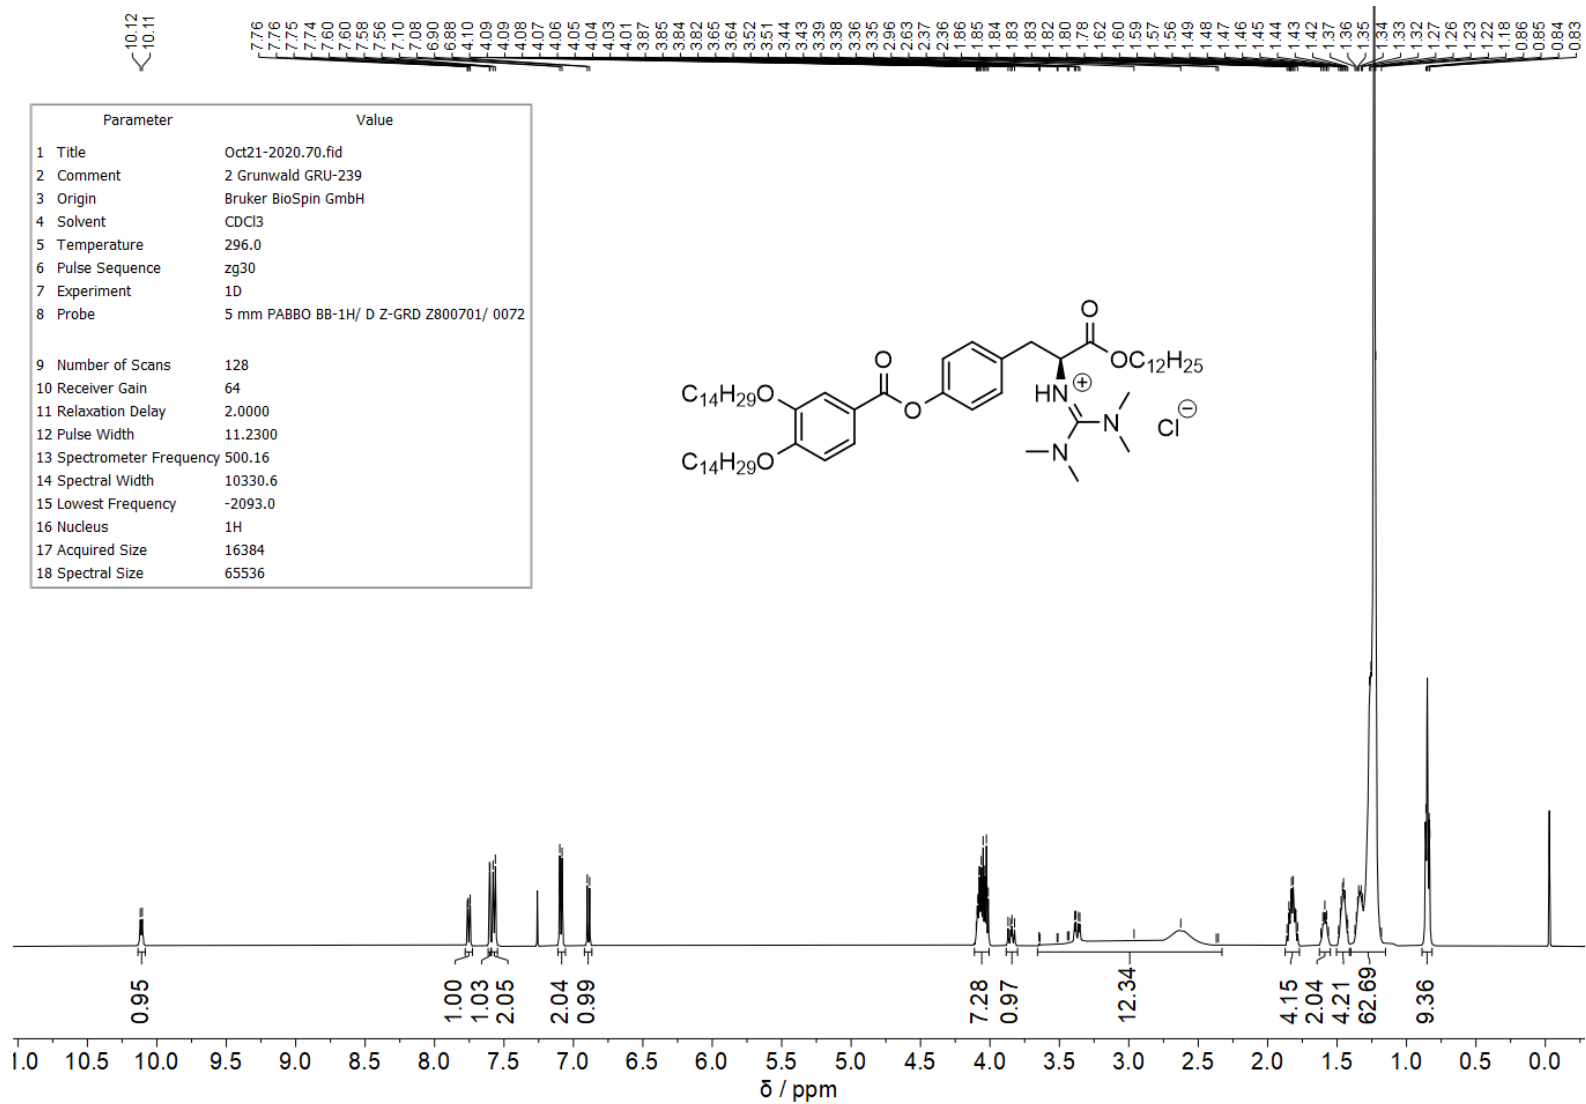



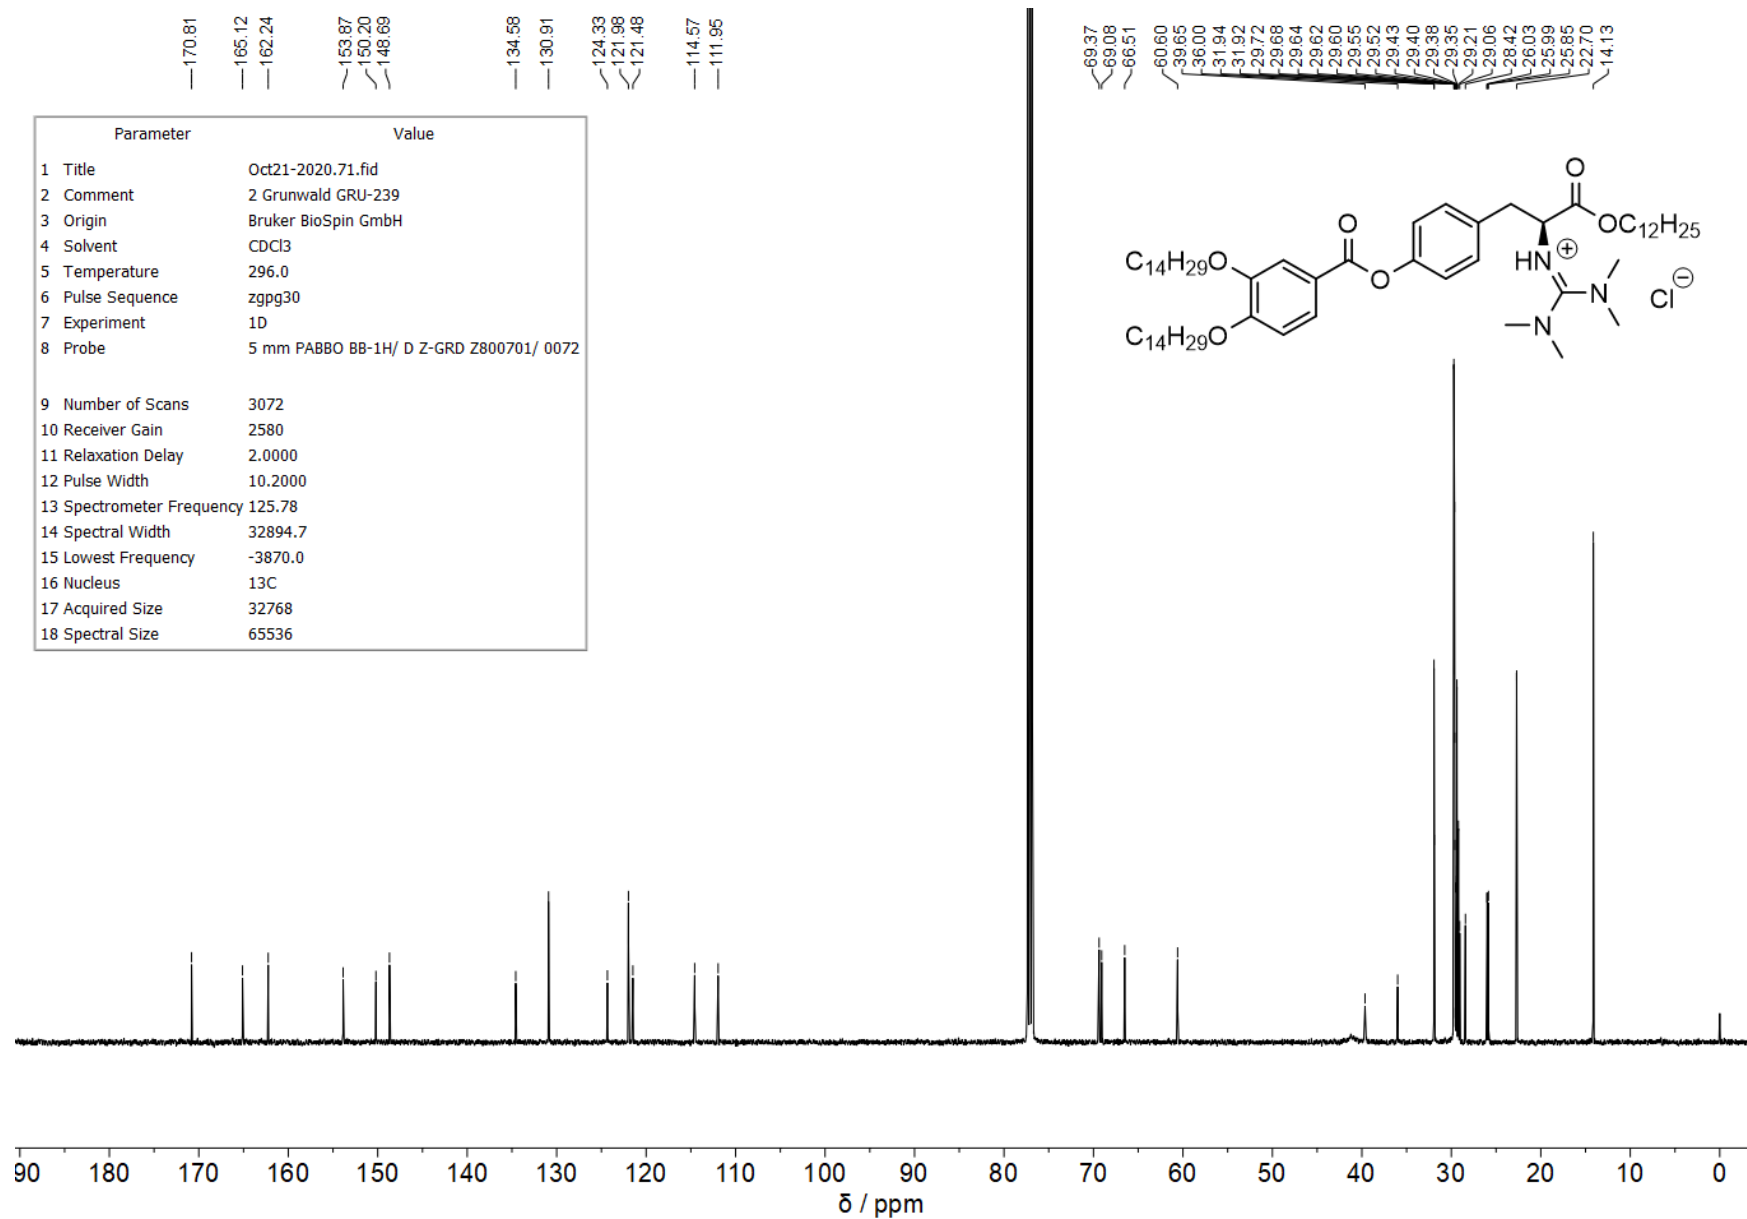

3,4-C<sub>10</sub>TyrC<sub>14</sub>Cl

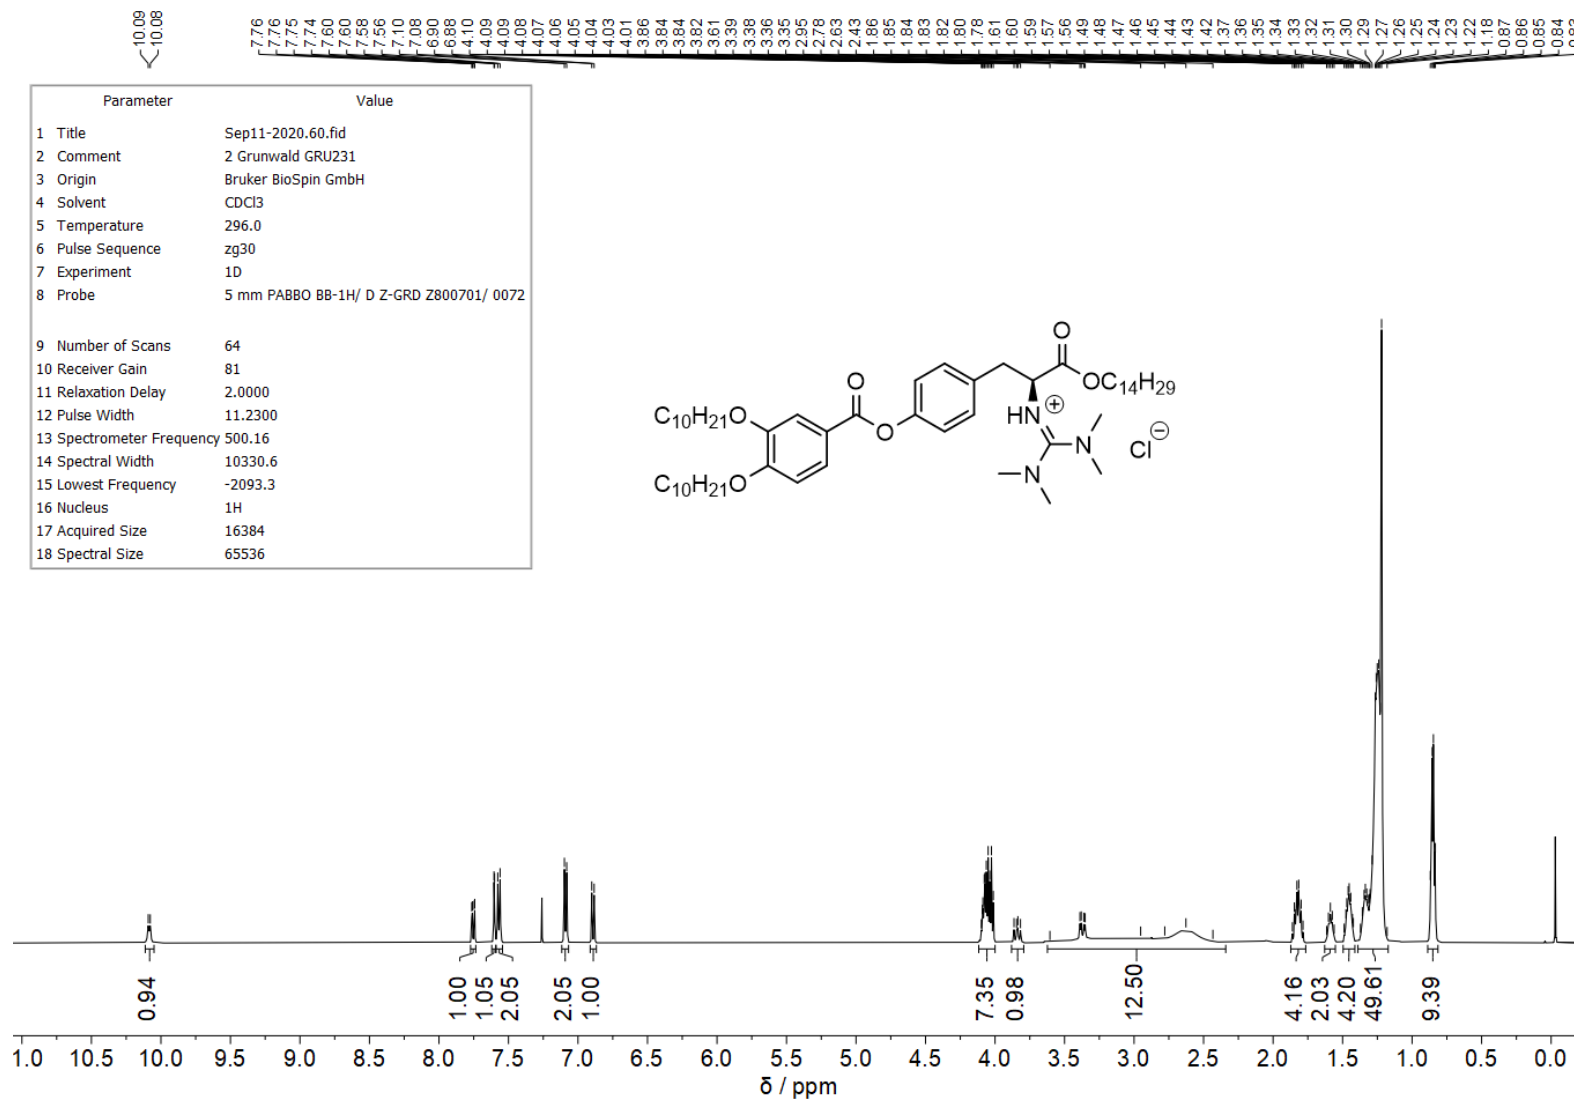

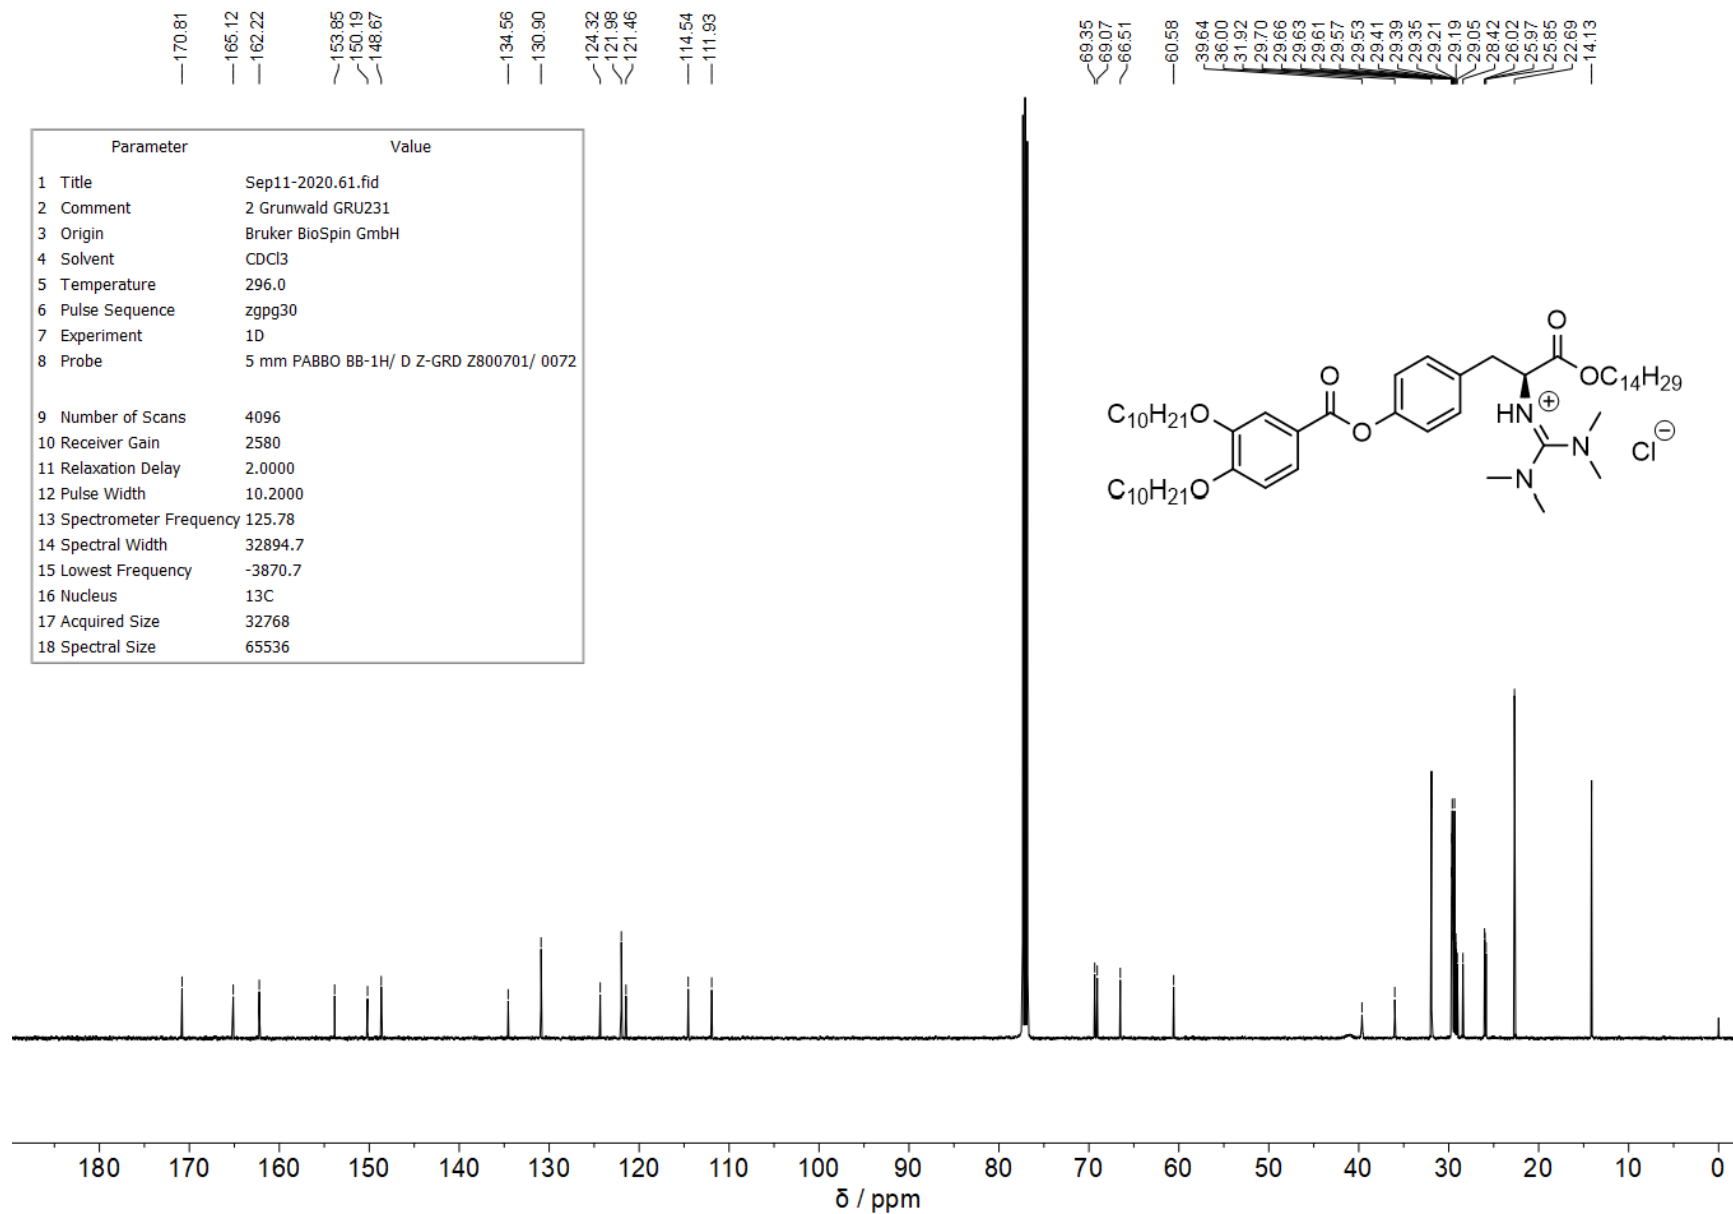

3,4-C<sub>12</sub>TyrC<sub>14</sub>Cl

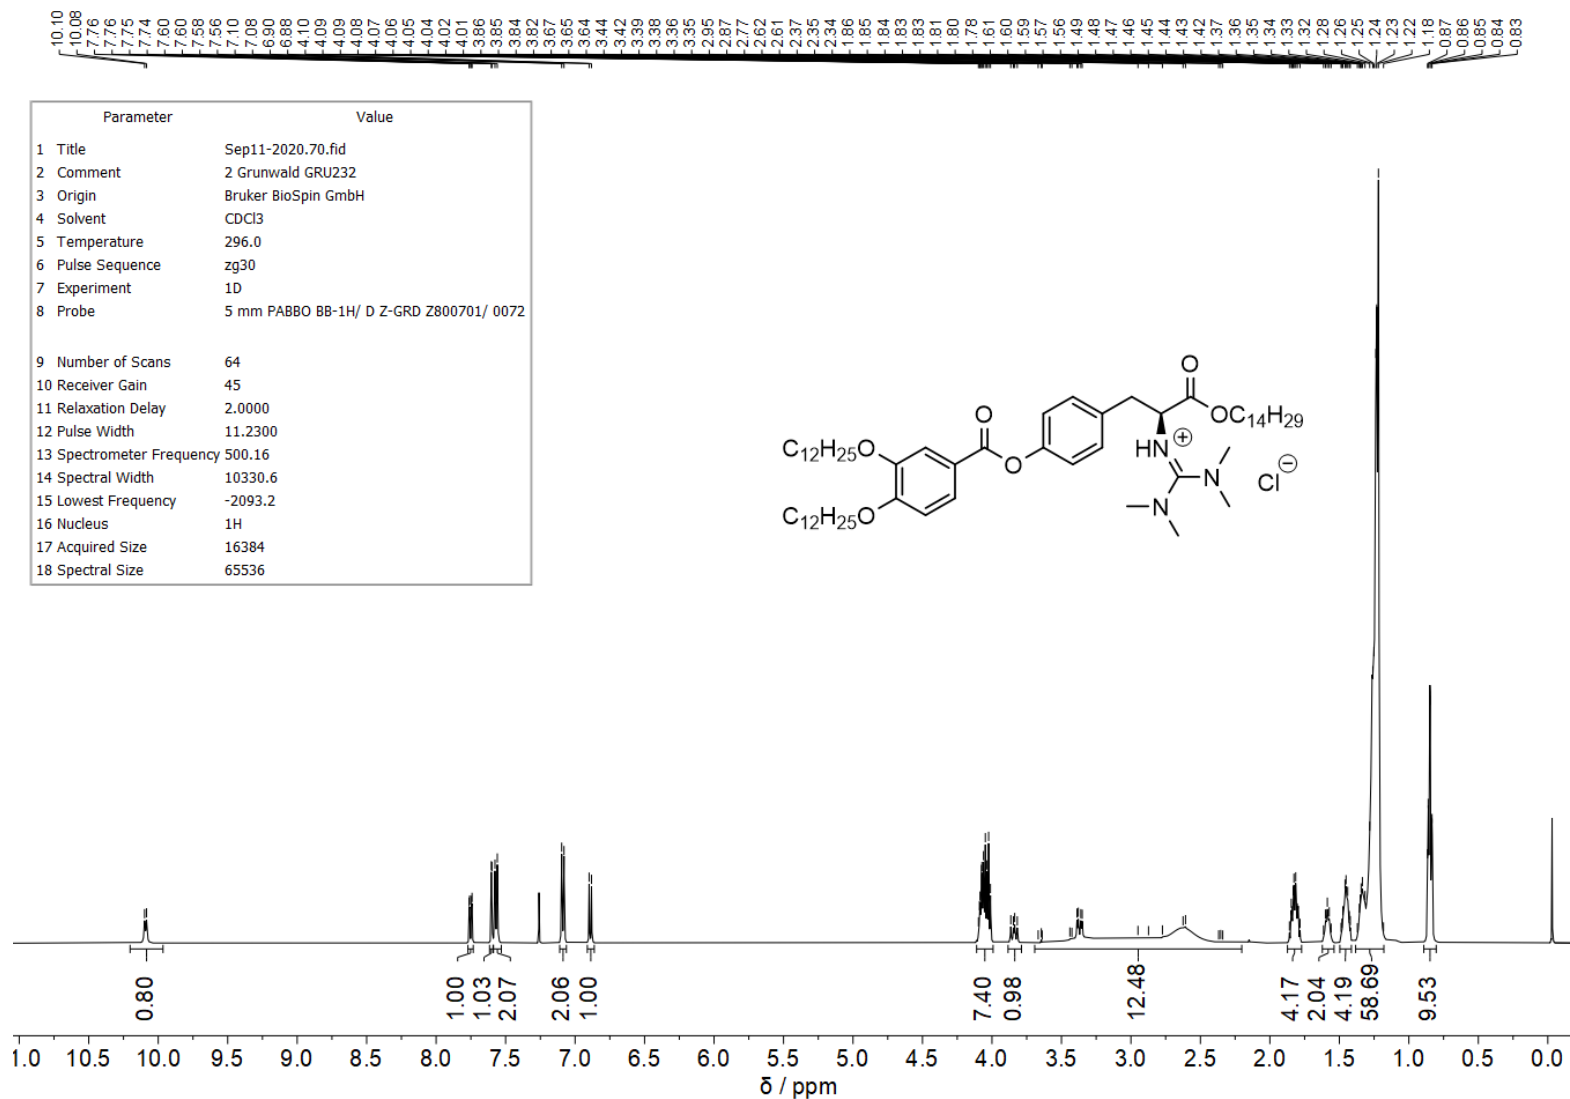

| Parameter                 | Value                                   |
|---------------------------|-----------------------------------------|
| 1 Title                   | Sep11-2020.70.fid                       |
| 2 Comment                 | 2 Grunwald GRU232                       |
| 3 Origin                  | Bruker BioSpin GmbH                     |
| 4 Solvent                 | CDCl <sub>3</sub>                       |
| 5 Temperature             | 296.0                                   |
| 6 Pulse Sequence          | zg30                                    |
| 7 Experiment              | 1D                                      |
| 8 Probe                   | 5 mm PABBO BB-1H/ D Z-GRD Z800701/ 0072 |
| 9 Number of Scans         | 64                                      |
| 10 Receiver Gain          | 45                                      |
| 11 Relaxation Delay       | 2.0000                                  |
| 12 Pulse Width            | 11.2300                                 |
| 13 Spectrometer Frequency | 500.16                                  |
| 14 Spectral Width         | 10330.6                                 |
| 15 Lowest Frequency       | -2093.2                                 |
| 16 Nucleus                | 1H                                      |
| 17 Acquired Size          | 16384                                   |
| 18 Spectral Size          | 65536                                   |

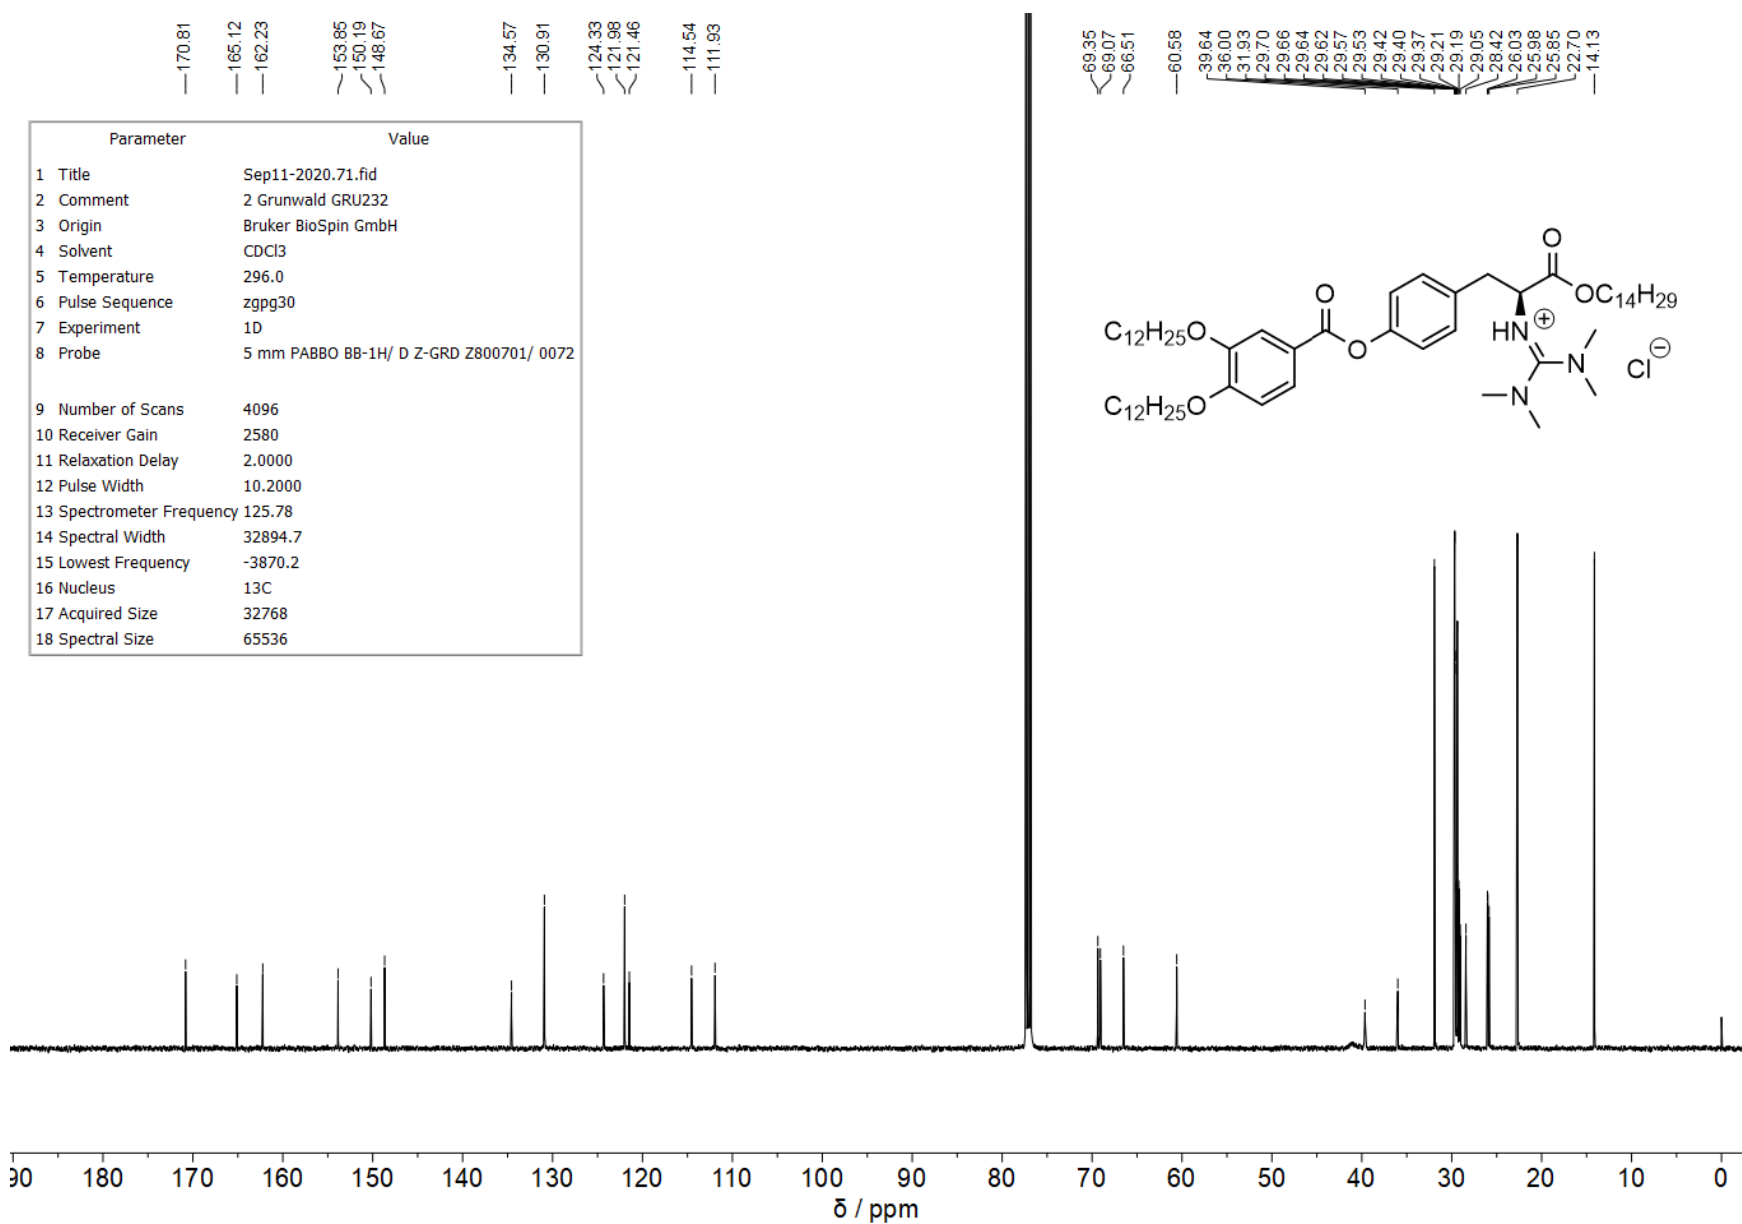

| Parameter                 | Value                                   |
|---------------------------|-----------------------------------------|
| 1 Title                   | Sep11-2020.71.fid                       |
| 2 Comment                 | 2 Grunwald GRU232                       |
| 3 Origin                  | Bruker BioSpin GmbH                     |
| 4 Solvent                 | CDCl3                                   |
| 5 Temperature             | 296.0                                   |
| 6 Pulse Sequence          | zgpg30                                  |
| 7 Experiment              | 1D                                      |
| 8 Probe                   | 5 mm PABBO BB-1H/ D Z-GRD Z800701/ 0072 |
| 9 Number of Scans         | 4096                                    |
| 10 Receiver Gain          | 2580                                    |
| 11 Relaxation Delay       | 2.0000                                  |
| 12 Pulse Width            | 10.2000                                 |
| 13 Spectrometer Frequency | 125.78                                  |
| 14 Spectral Width         | 32894.7                                 |
| 15 Lowest Frequency       | -3870.2                                 |
| 16 Nucleus                | 13C                                     |
| 17 Acquired Size          | 32768                                   |
| 18 Spectral Size          | 65536                                   |

3,4-C<sub>14</sub>TyrC<sub>14</sub>Cl

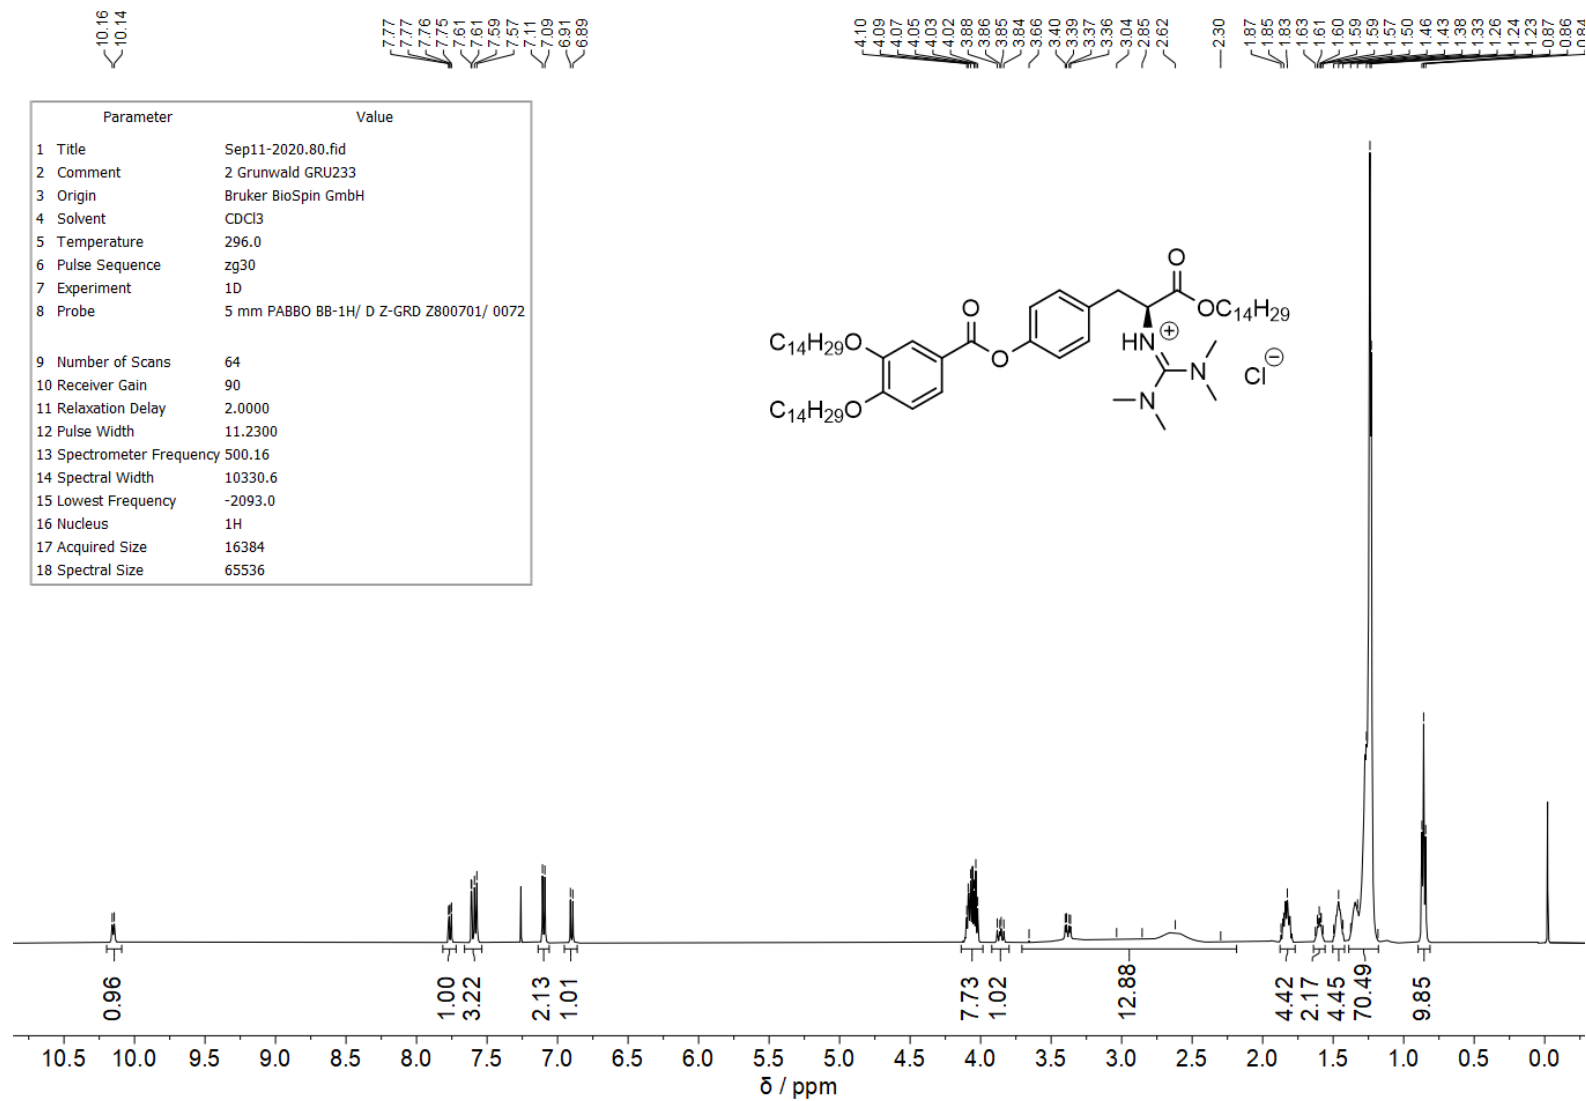

| Parameter                 | Value                                   |
|---------------------------|-----------------------------------------|
| 1 Title                   | Sep11-2020.80.fid                       |
| 2 Comment                 | 2 Grunwald GRU233                       |
| 3 Origin                  | Bruker BioSpin GmbH                     |
| 4 Solvent                 | CDCl3                                   |
| 5 Temperature             | 296.0                                   |
| 6 Pulse Sequence          | zg30                                    |
| 7 Experiment              | 1D                                      |
| 8 Probe                   | 5 mm PABBO BB-1H/ D Z-GRD Z800701/ 0072 |
| 9 Number of Scans         | 64                                      |
| 10 Receiver Gain          | 90                                      |
| 11 Relaxation Delay       | 2.0000                                  |
| 12 Pulse Width            | 11.2300                                 |
| 13 Spectrometer Frequency | 500.16                                  |
| 14 Spectral Width         | 10330.6                                 |
| 15 Lowest Frequency       | -2093.0                                 |
| 16 Nucleus                | 1H                                      |
| 17 Acquired Size          | 16384                                   |
| 18 Spectral Size          | 65536                                   |

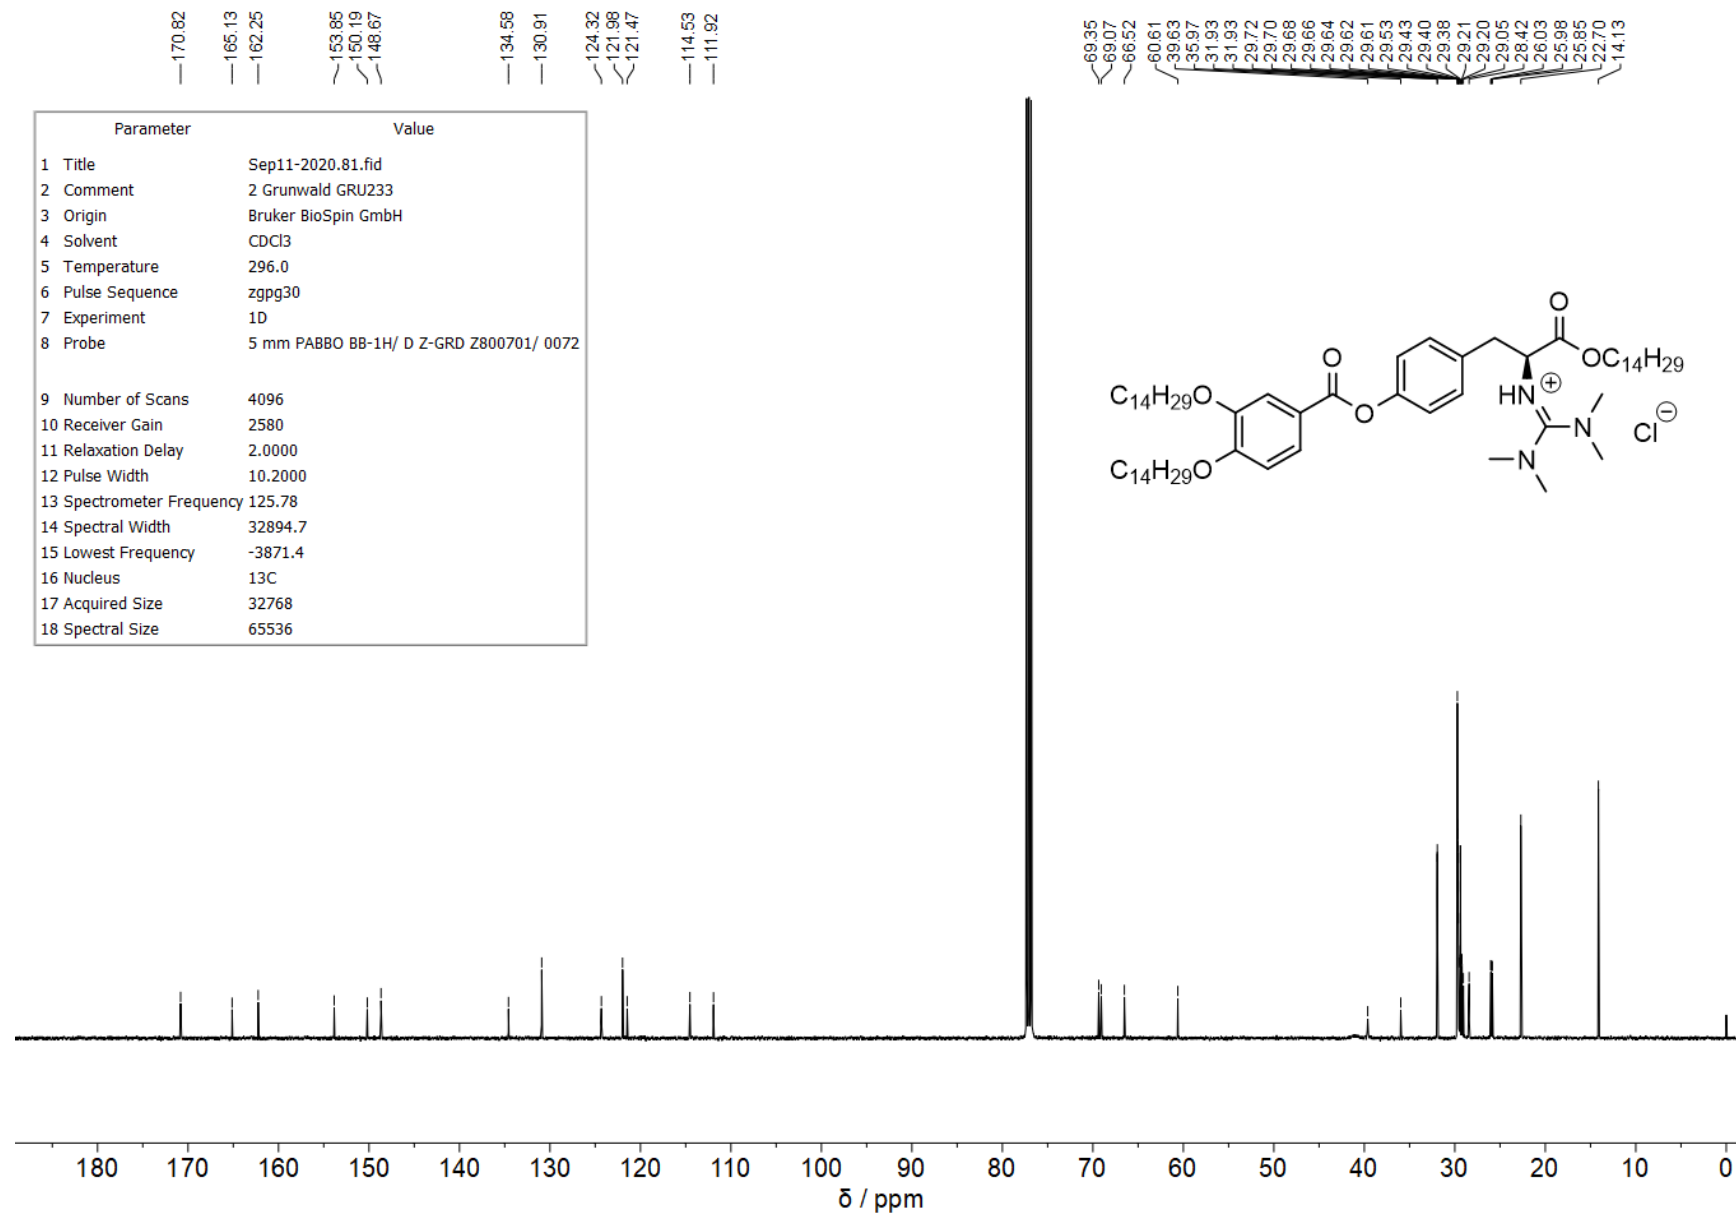

3,5-C<sub>10</sub>TyrC<sub>10</sub>Cl

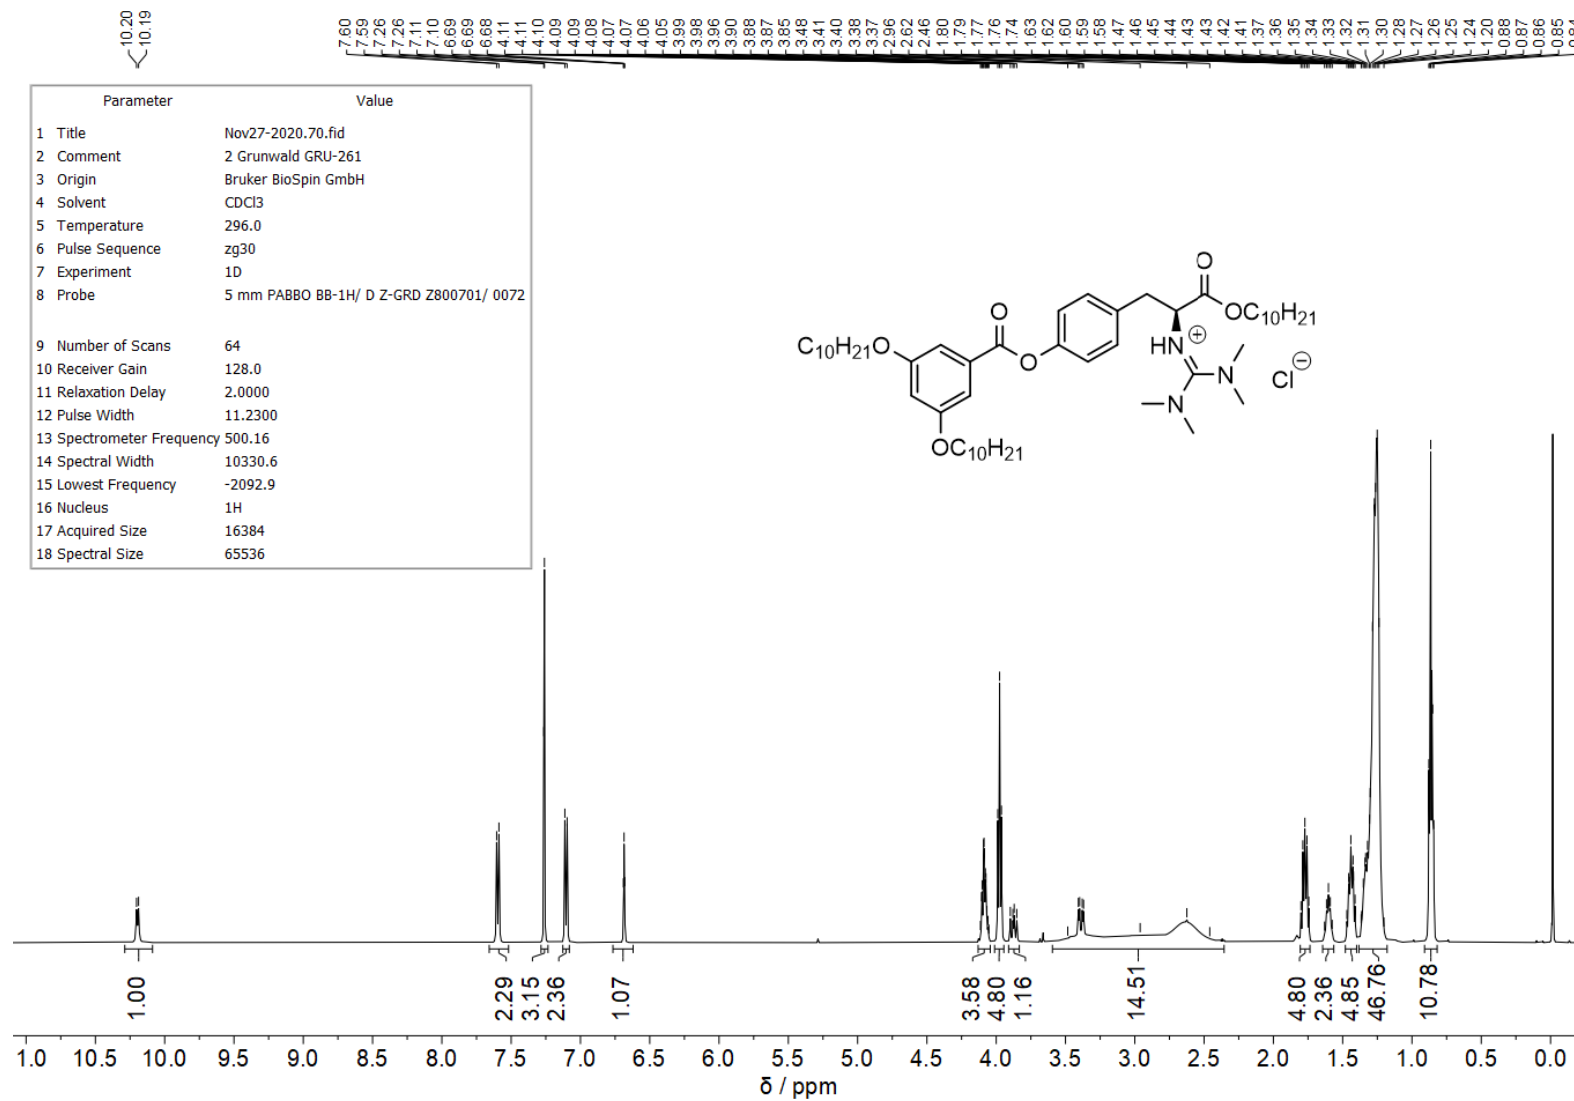



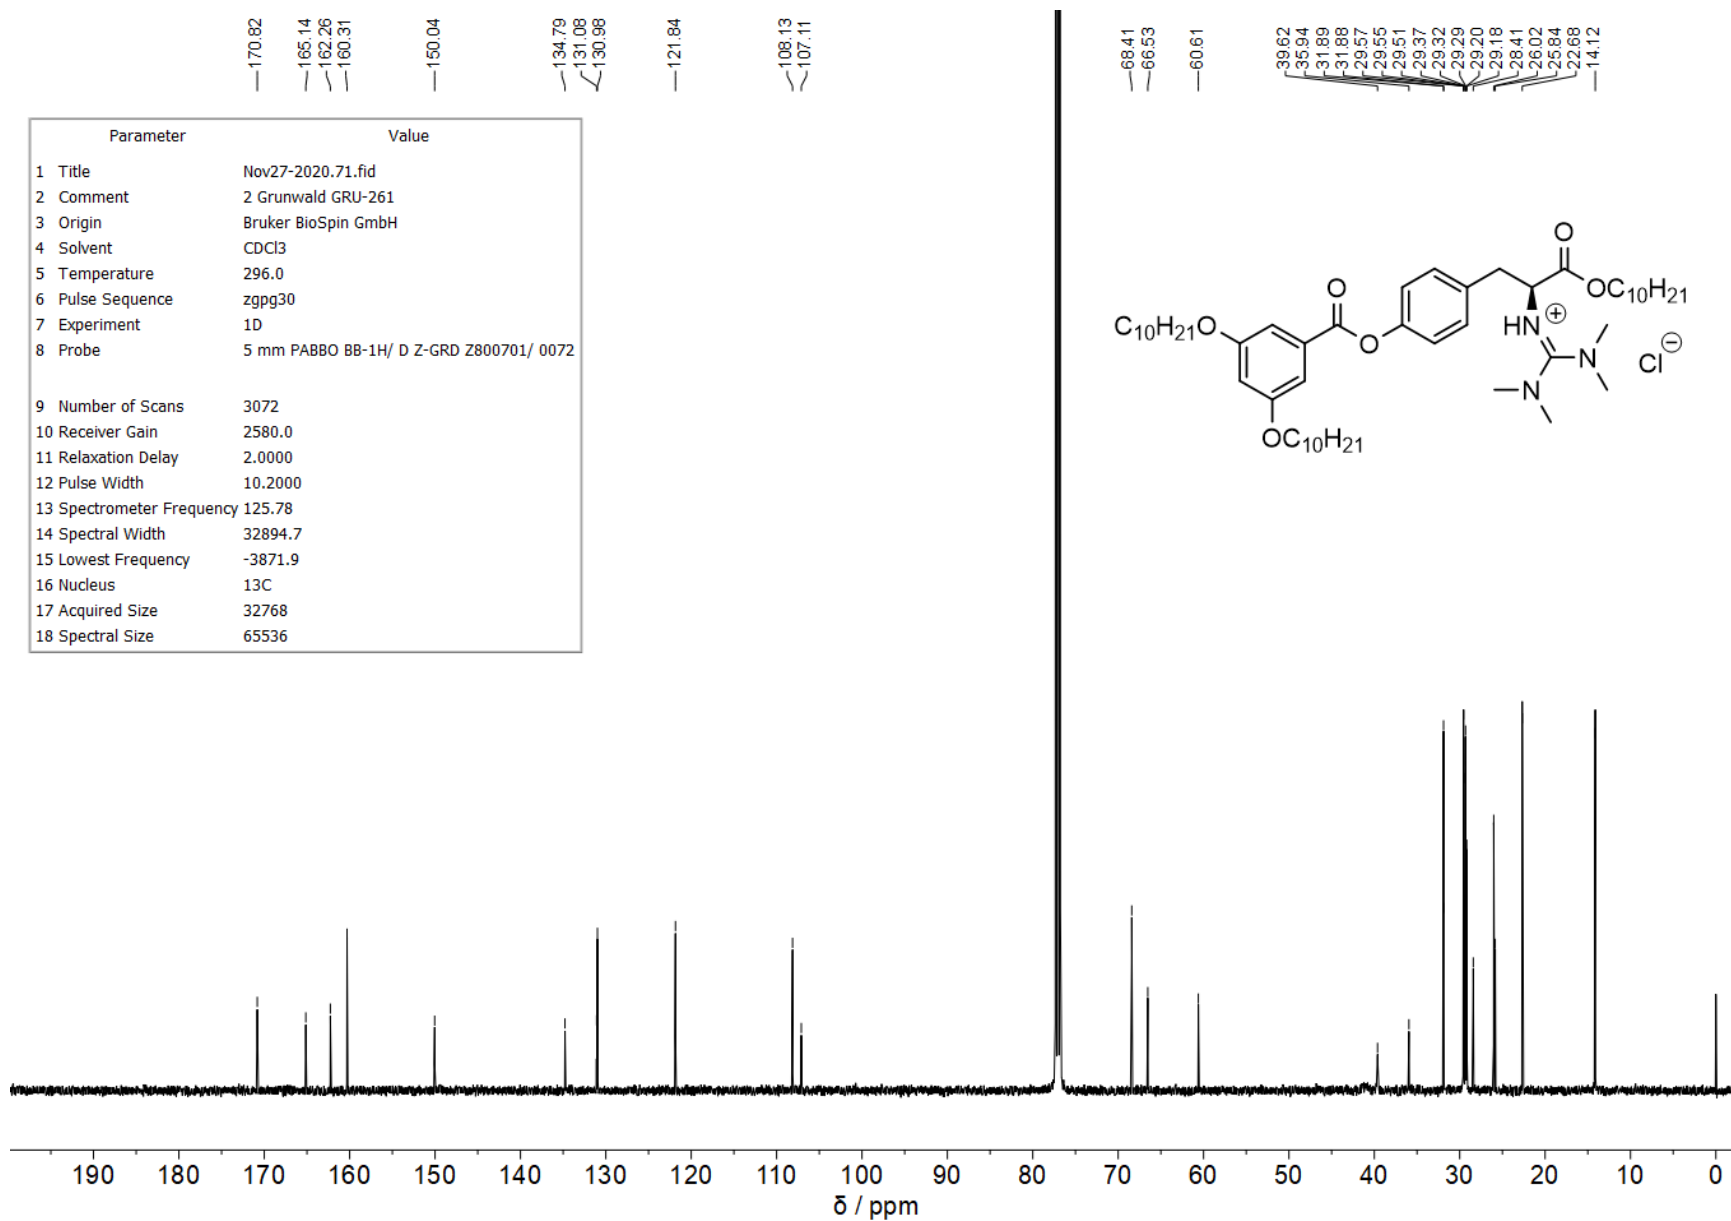

3,5-C<sub>12</sub>TyrC<sub>10</sub>Cl

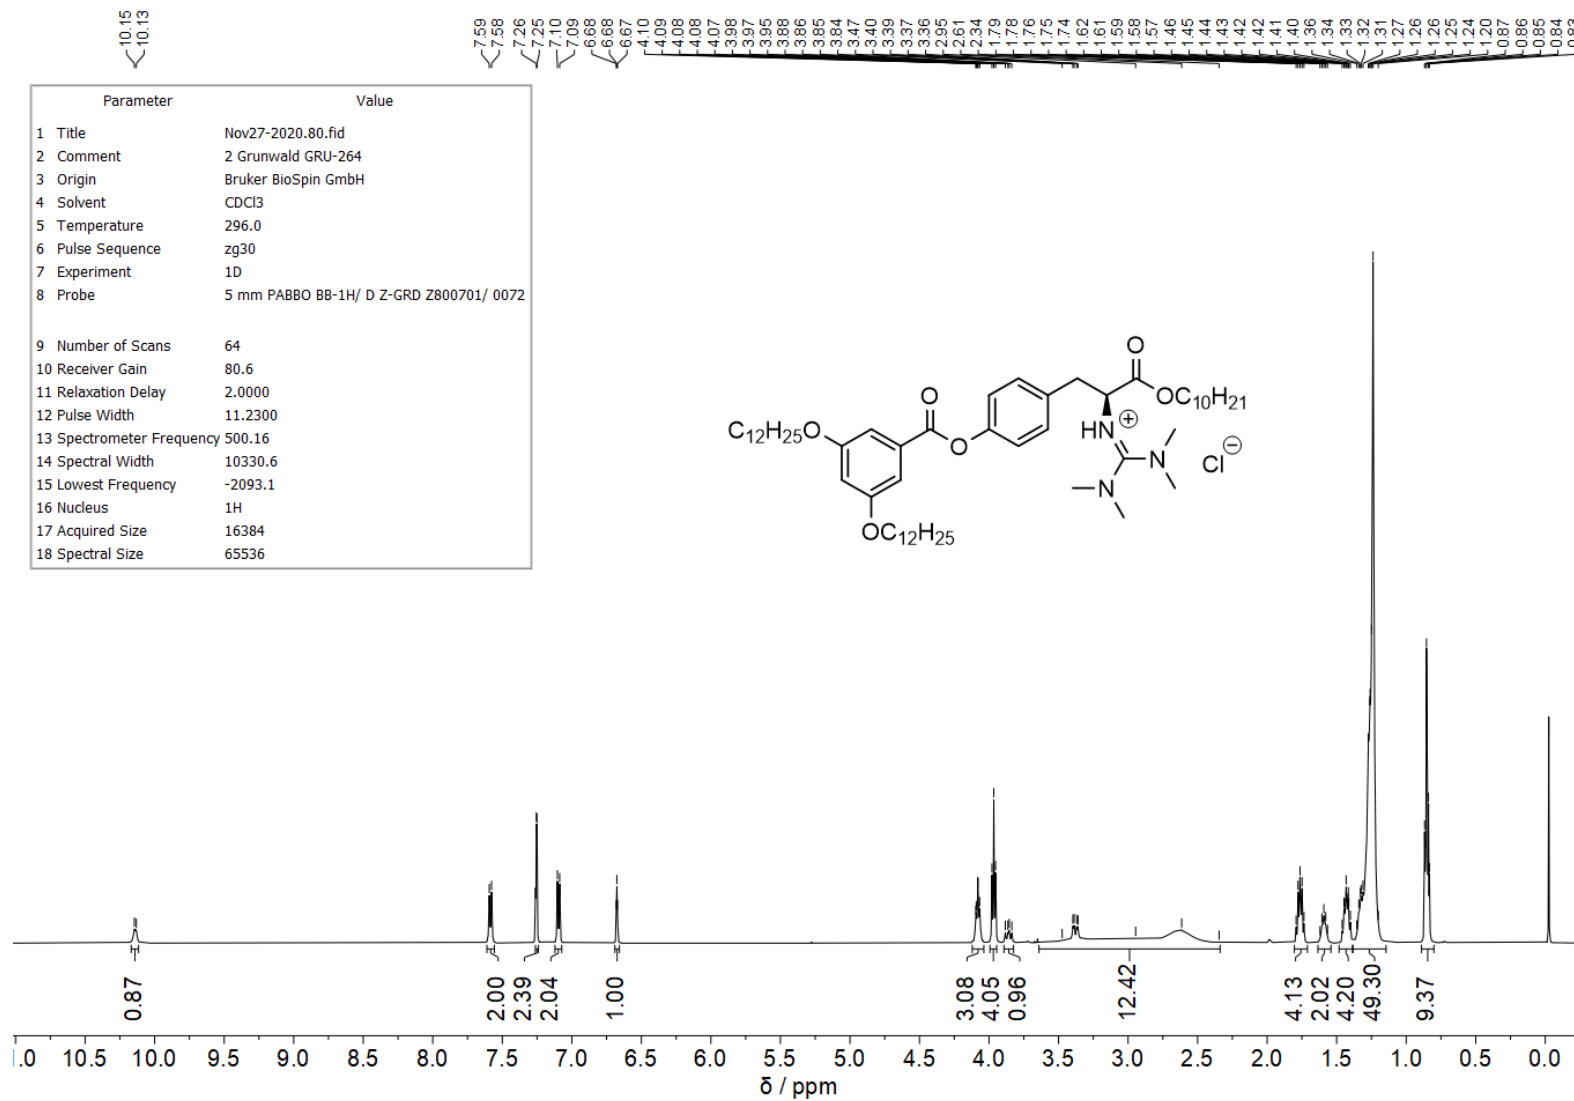

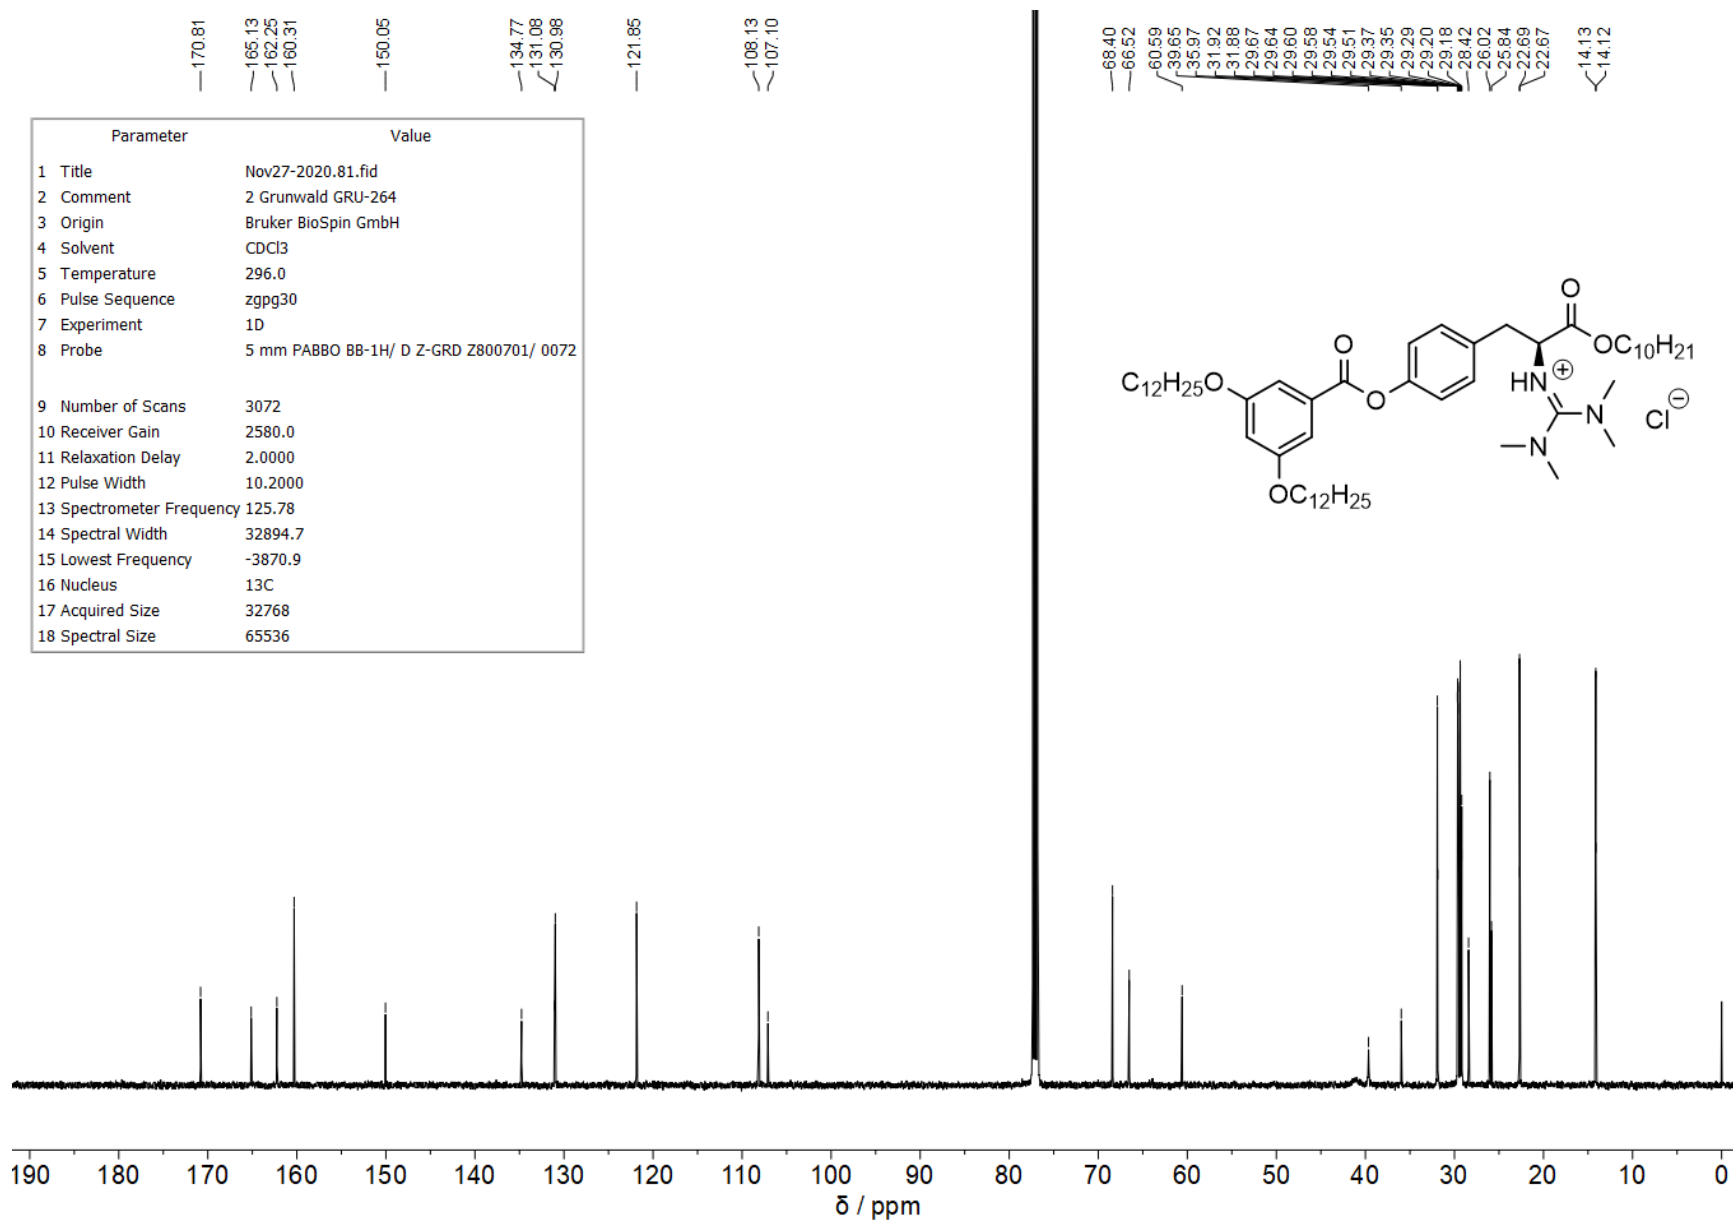

3,5-C<sub>14</sub>TyrC<sub>10</sub>Cl

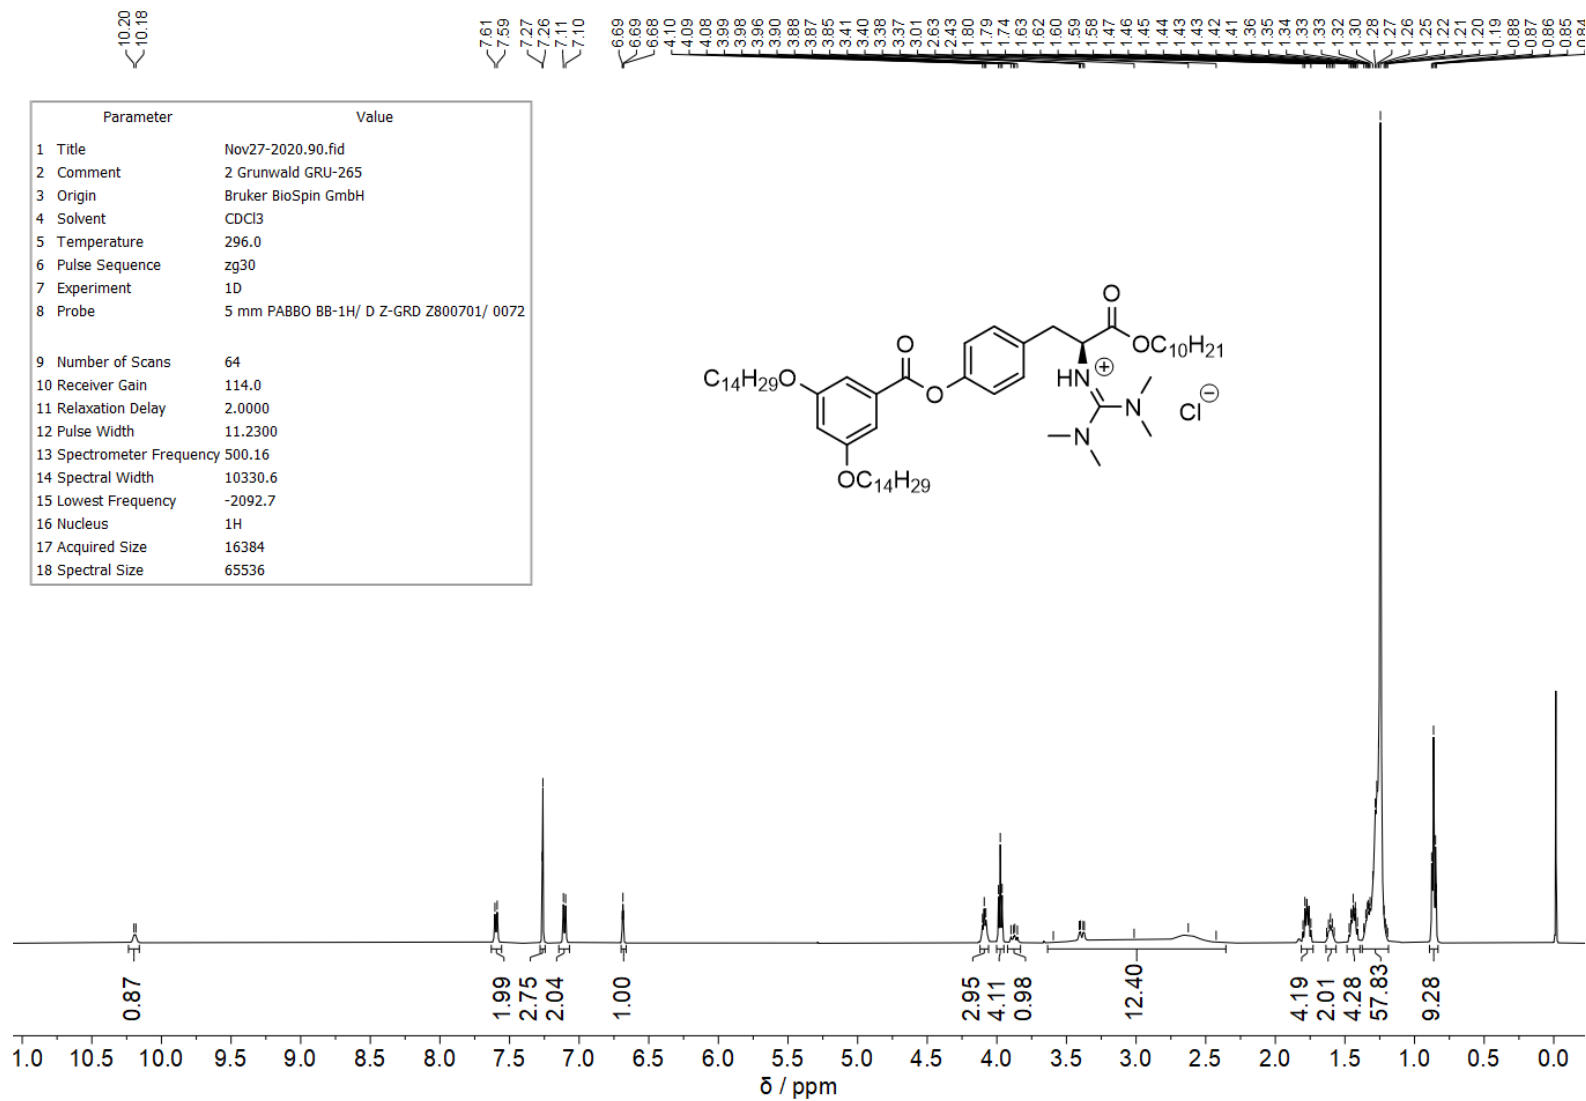

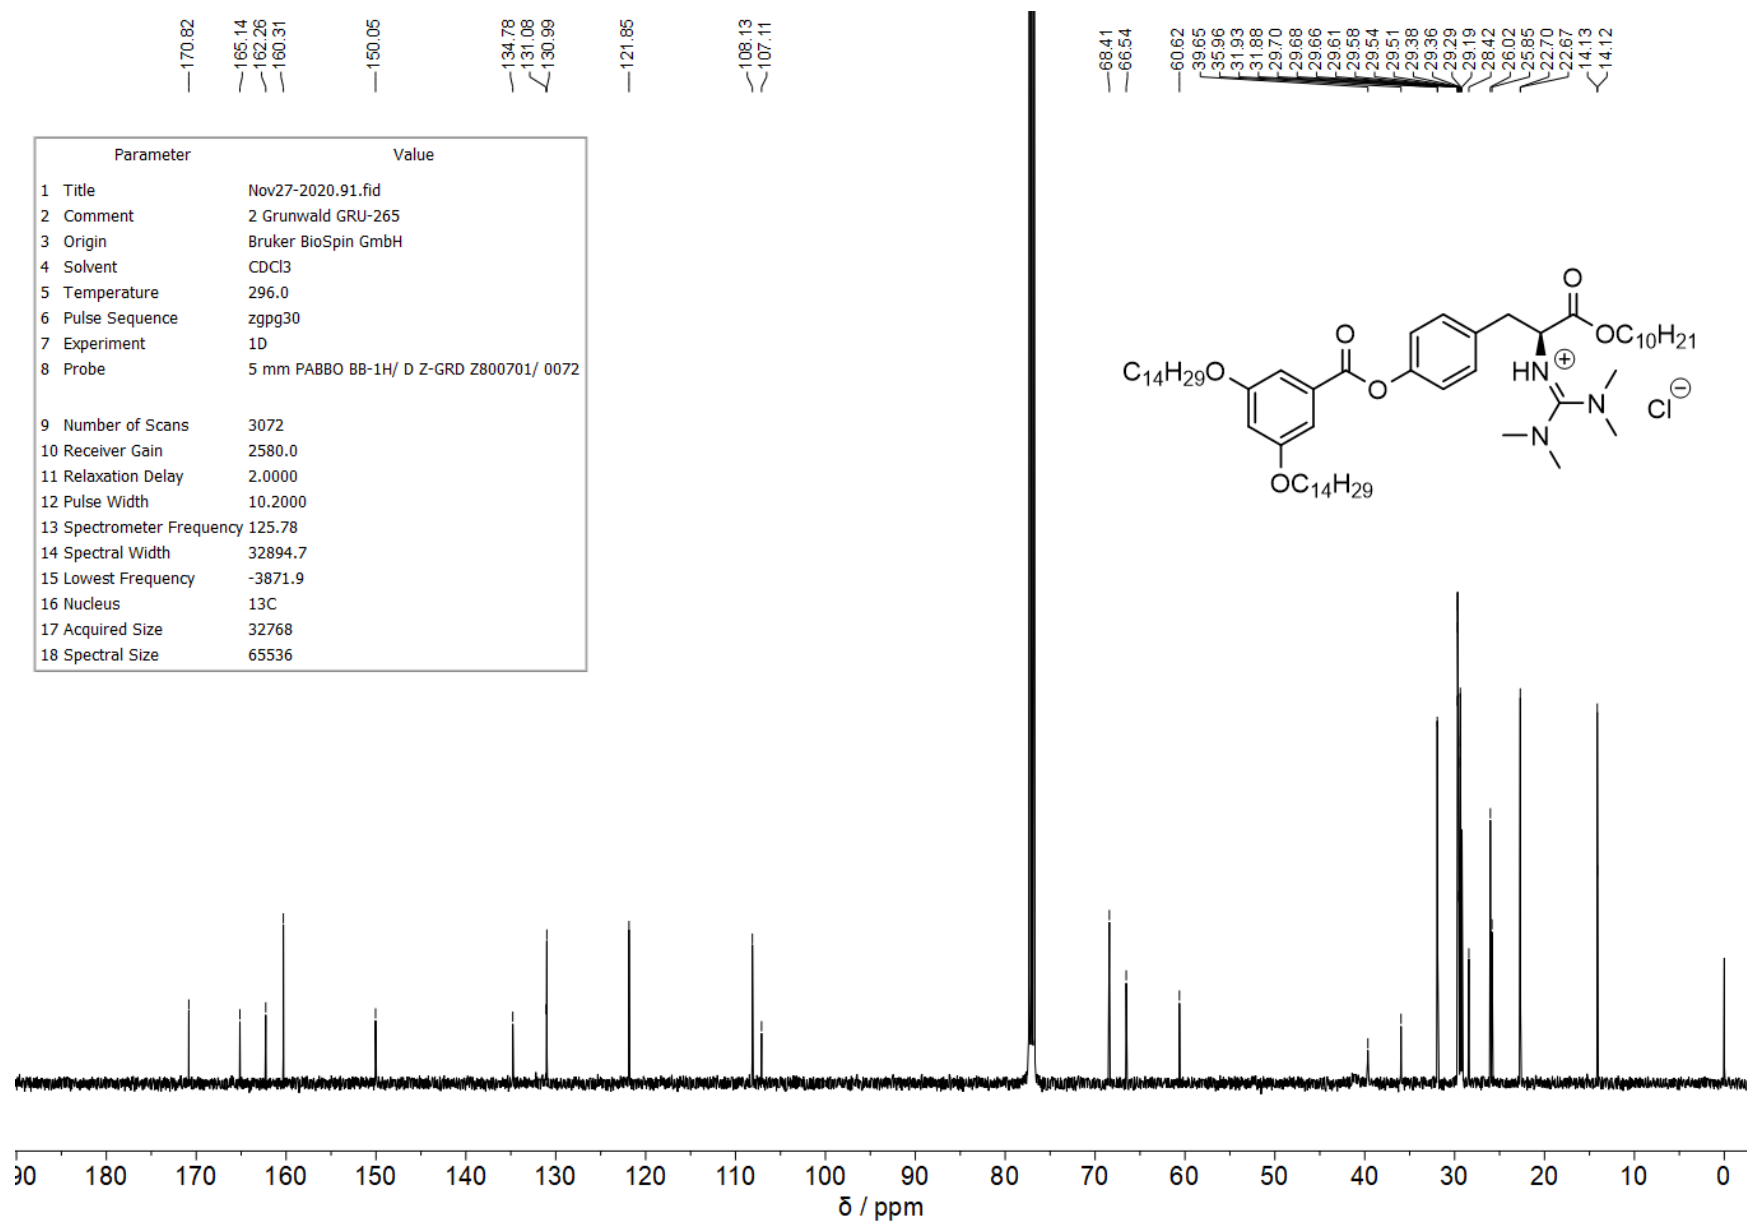

3,5-C<sub>10</sub>TyrC<sub>12</sub>Cl

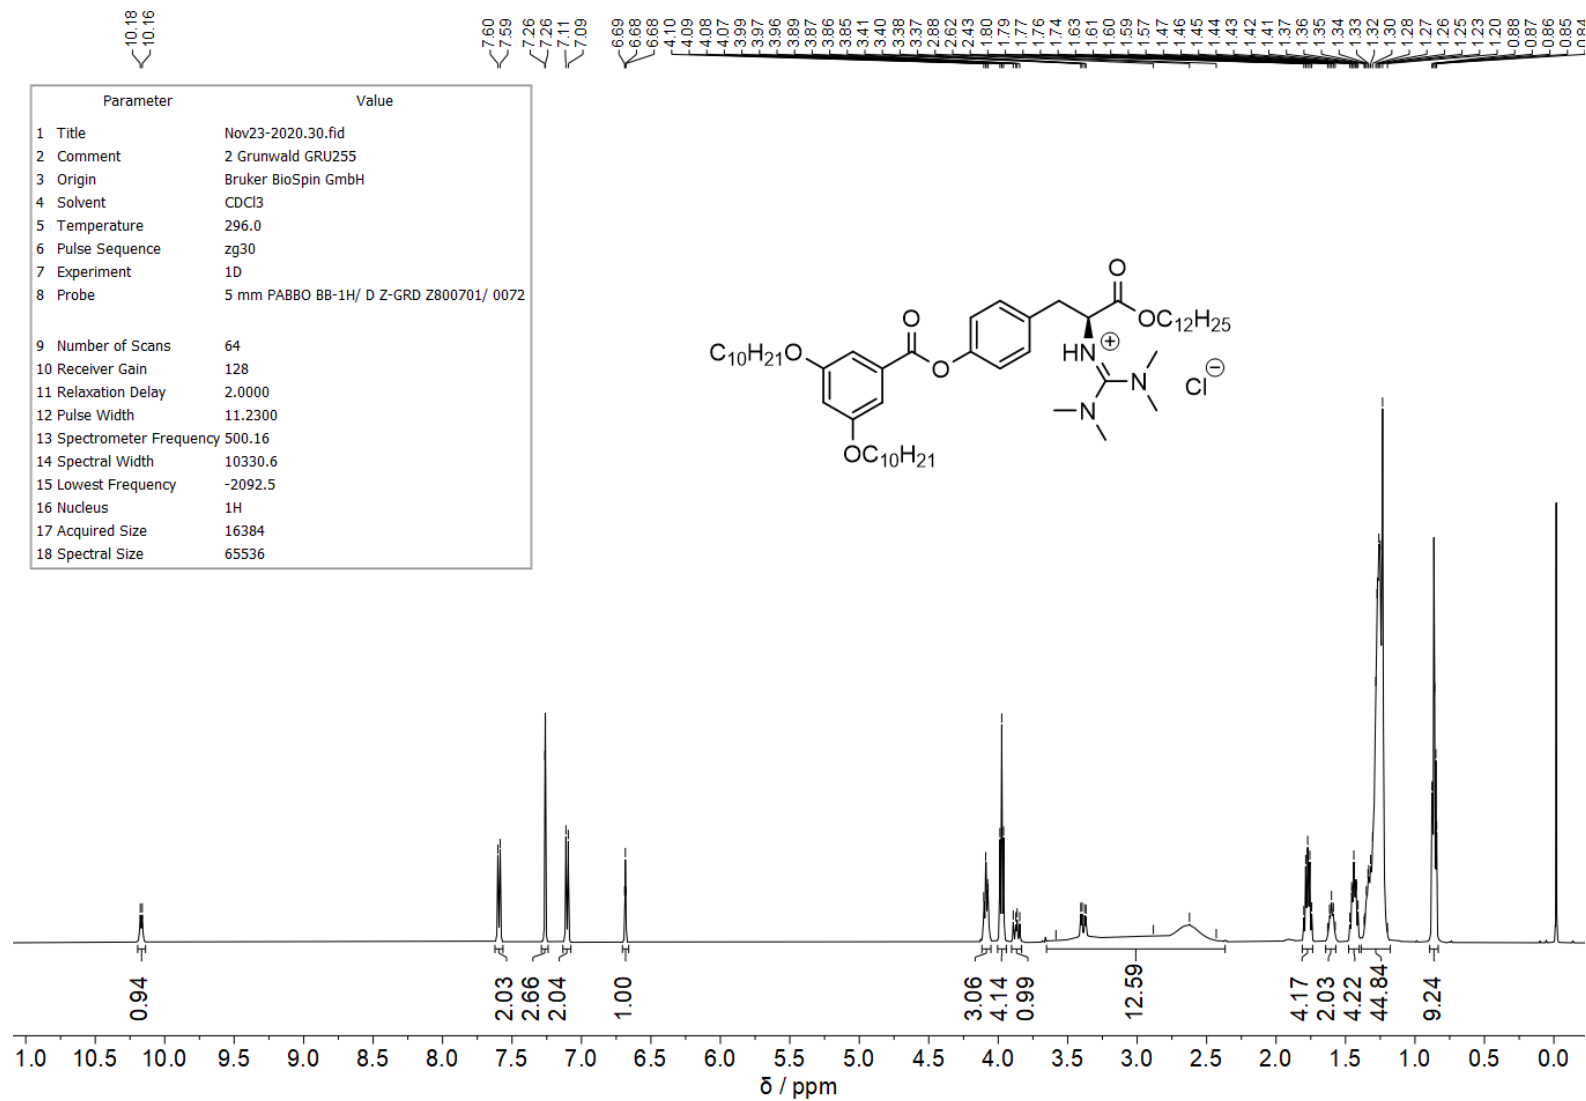

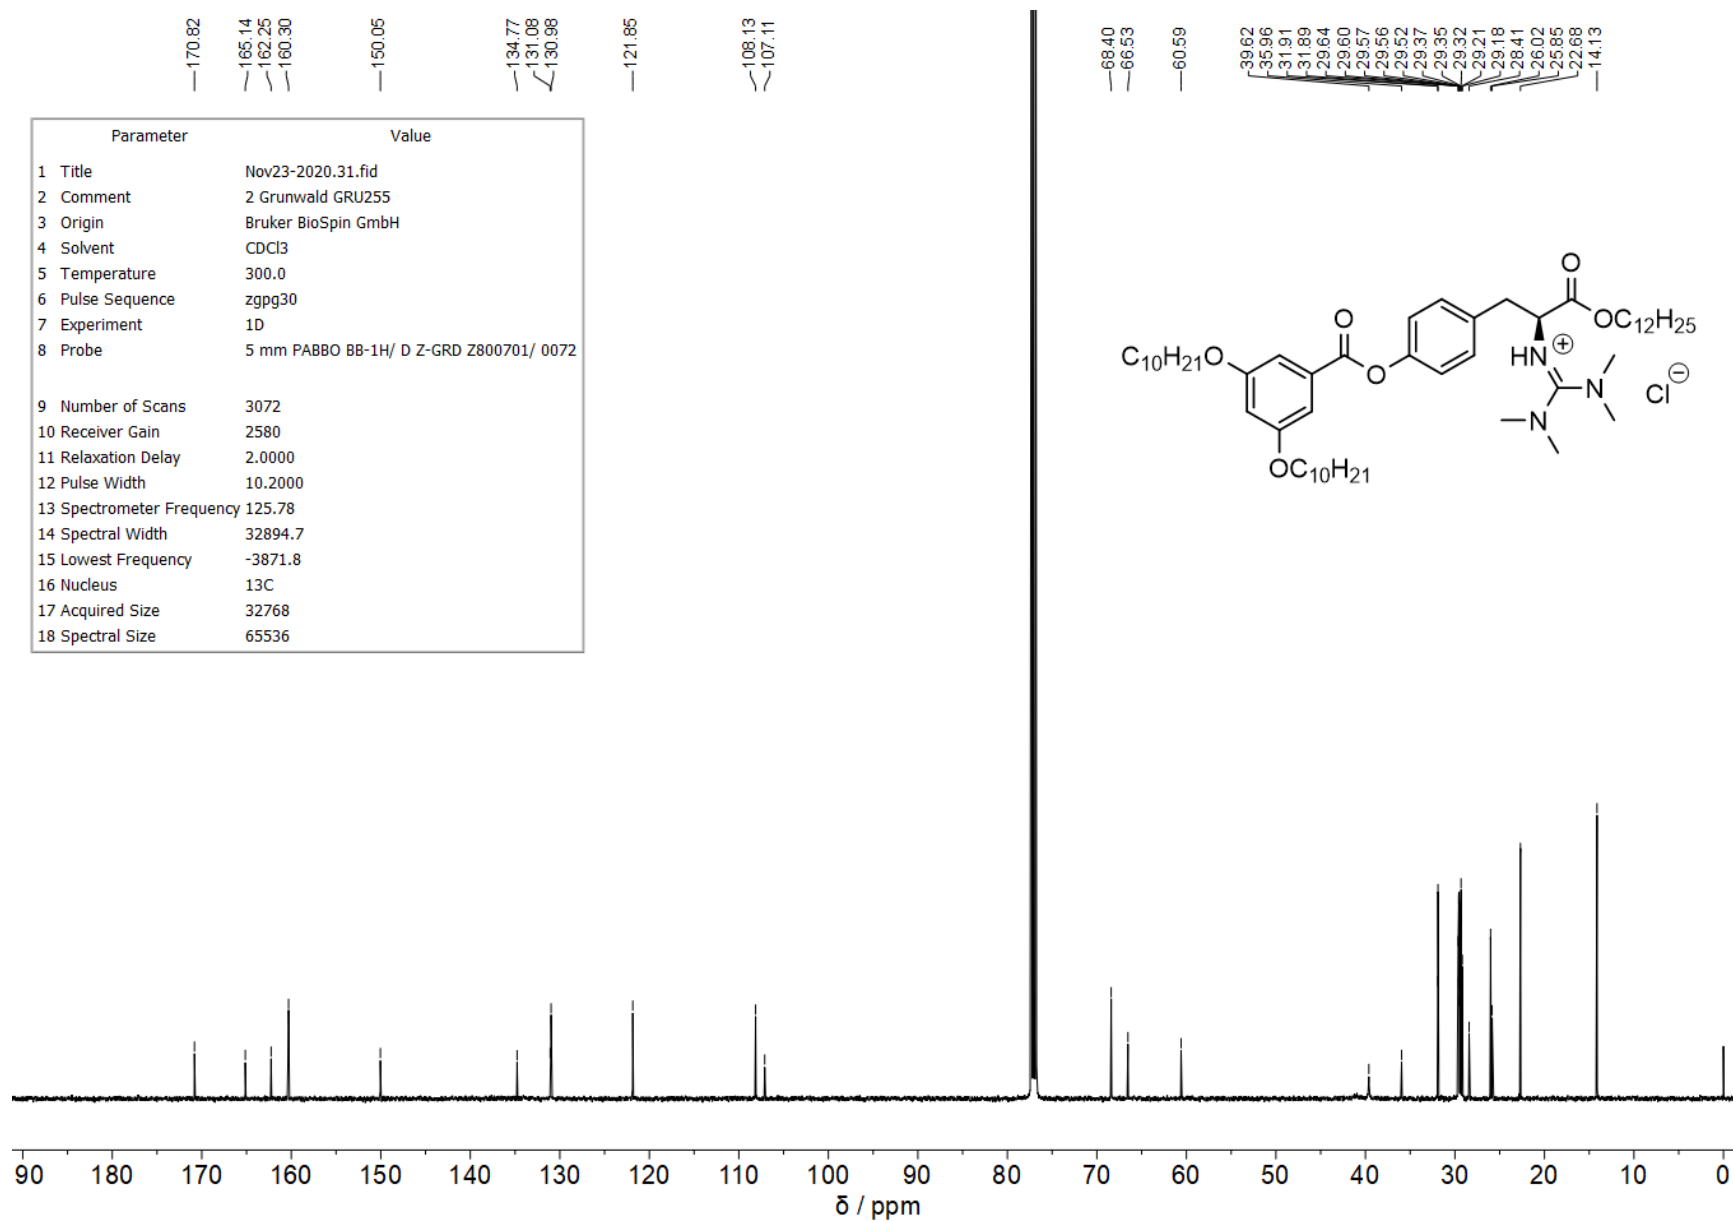

3,5-C<sub>12</sub>TyrC<sub>12</sub>Cl

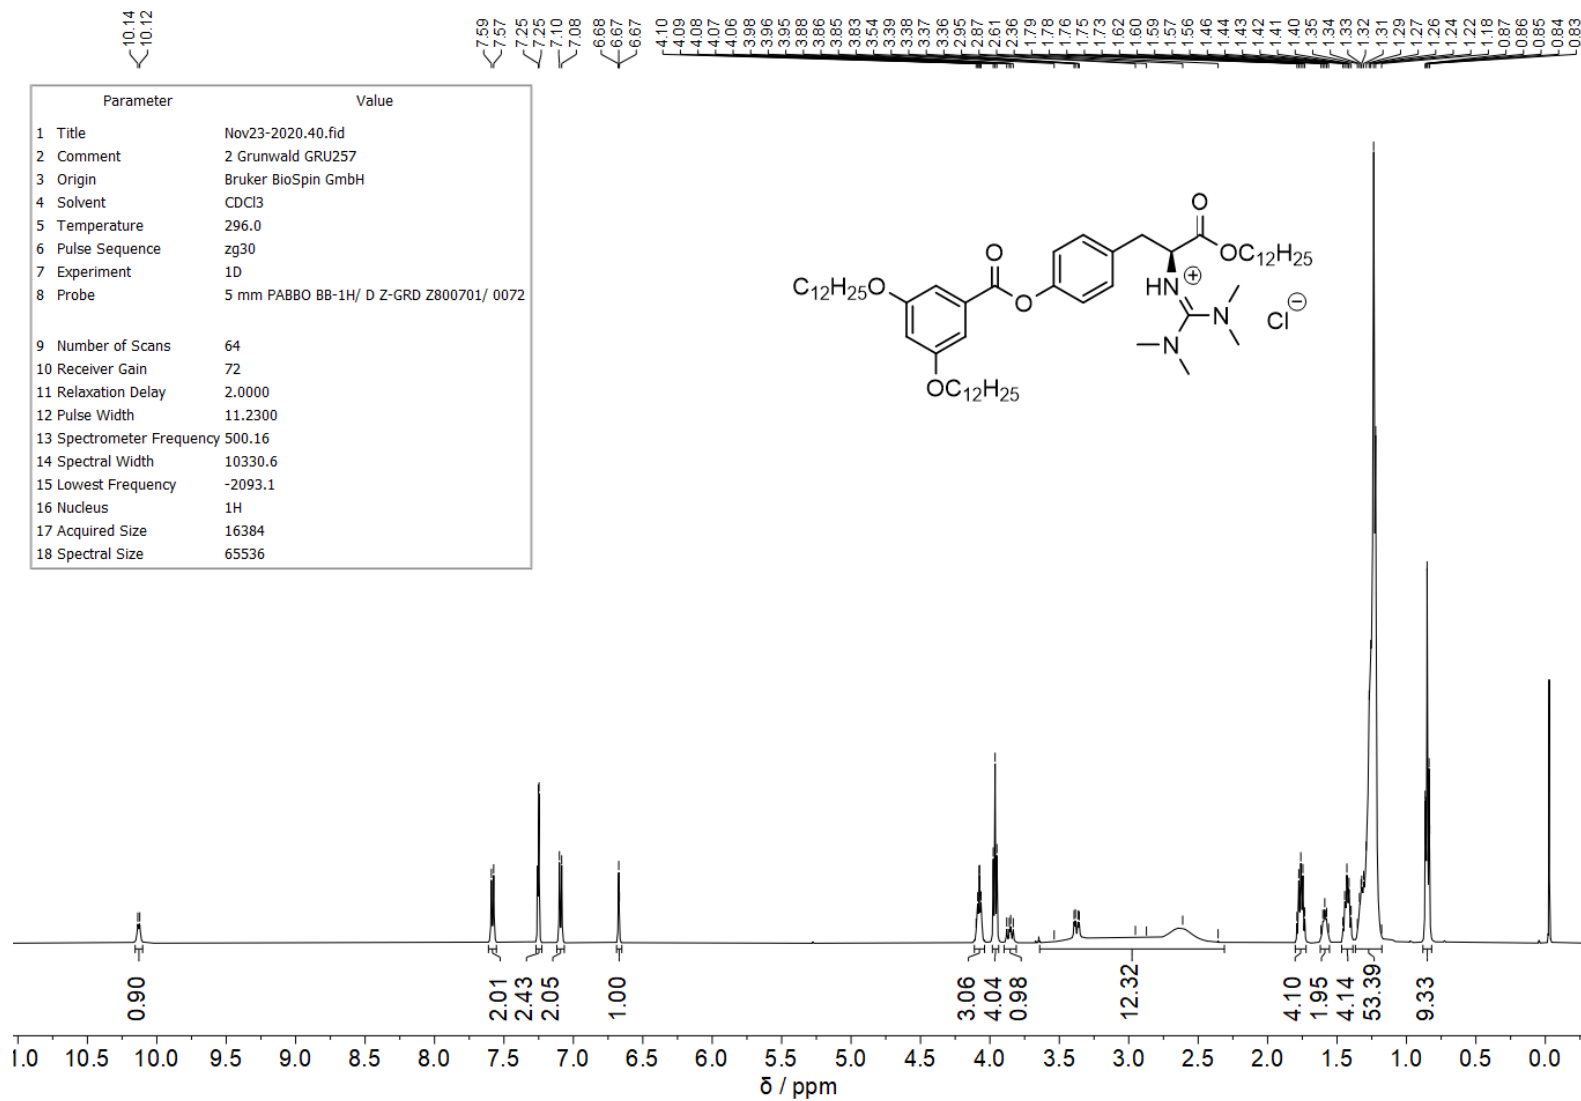

| Parameter                 | Value                                   |
|---------------------------|-----------------------------------------|
| 1 Title                   | Nov23-2020.40.fid                       |
| 2 Comment                 | 2 Grunwald GRU257                       |
| 3 Origin                  | Bruker BioSpin GmbH                     |
| 4 Solvent                 | CDCl <sub>3</sub>                       |
| 5 Temperature             | 296.0                                   |
| 6 Pulse Sequence          | zg30                                    |
| 7 Experiment              | 1D                                      |
| 8 Probe                   | 5 mm PABBO BB-1H/ D Z-GRD Z800701/ 0072 |
| 9 Number of Scans         | 64                                      |
| 10 Receiver Gain          | 72                                      |
| 11 Relaxation Delay       | 2.0000                                  |
| 12 Pulse Width            | 11.2300                                 |
| 13 Spectrometer Frequency | 500.16                                  |
| 14 Spectral Width         | 10330.6                                 |
| 15 Lowest Frequency       | -2093.1                                 |
| 16 Nucleus                | <sup>1</sup> H                          |
| 17 Acquired Size          | 16384                                   |
| 18 Spectral Size          | 65536                                   |



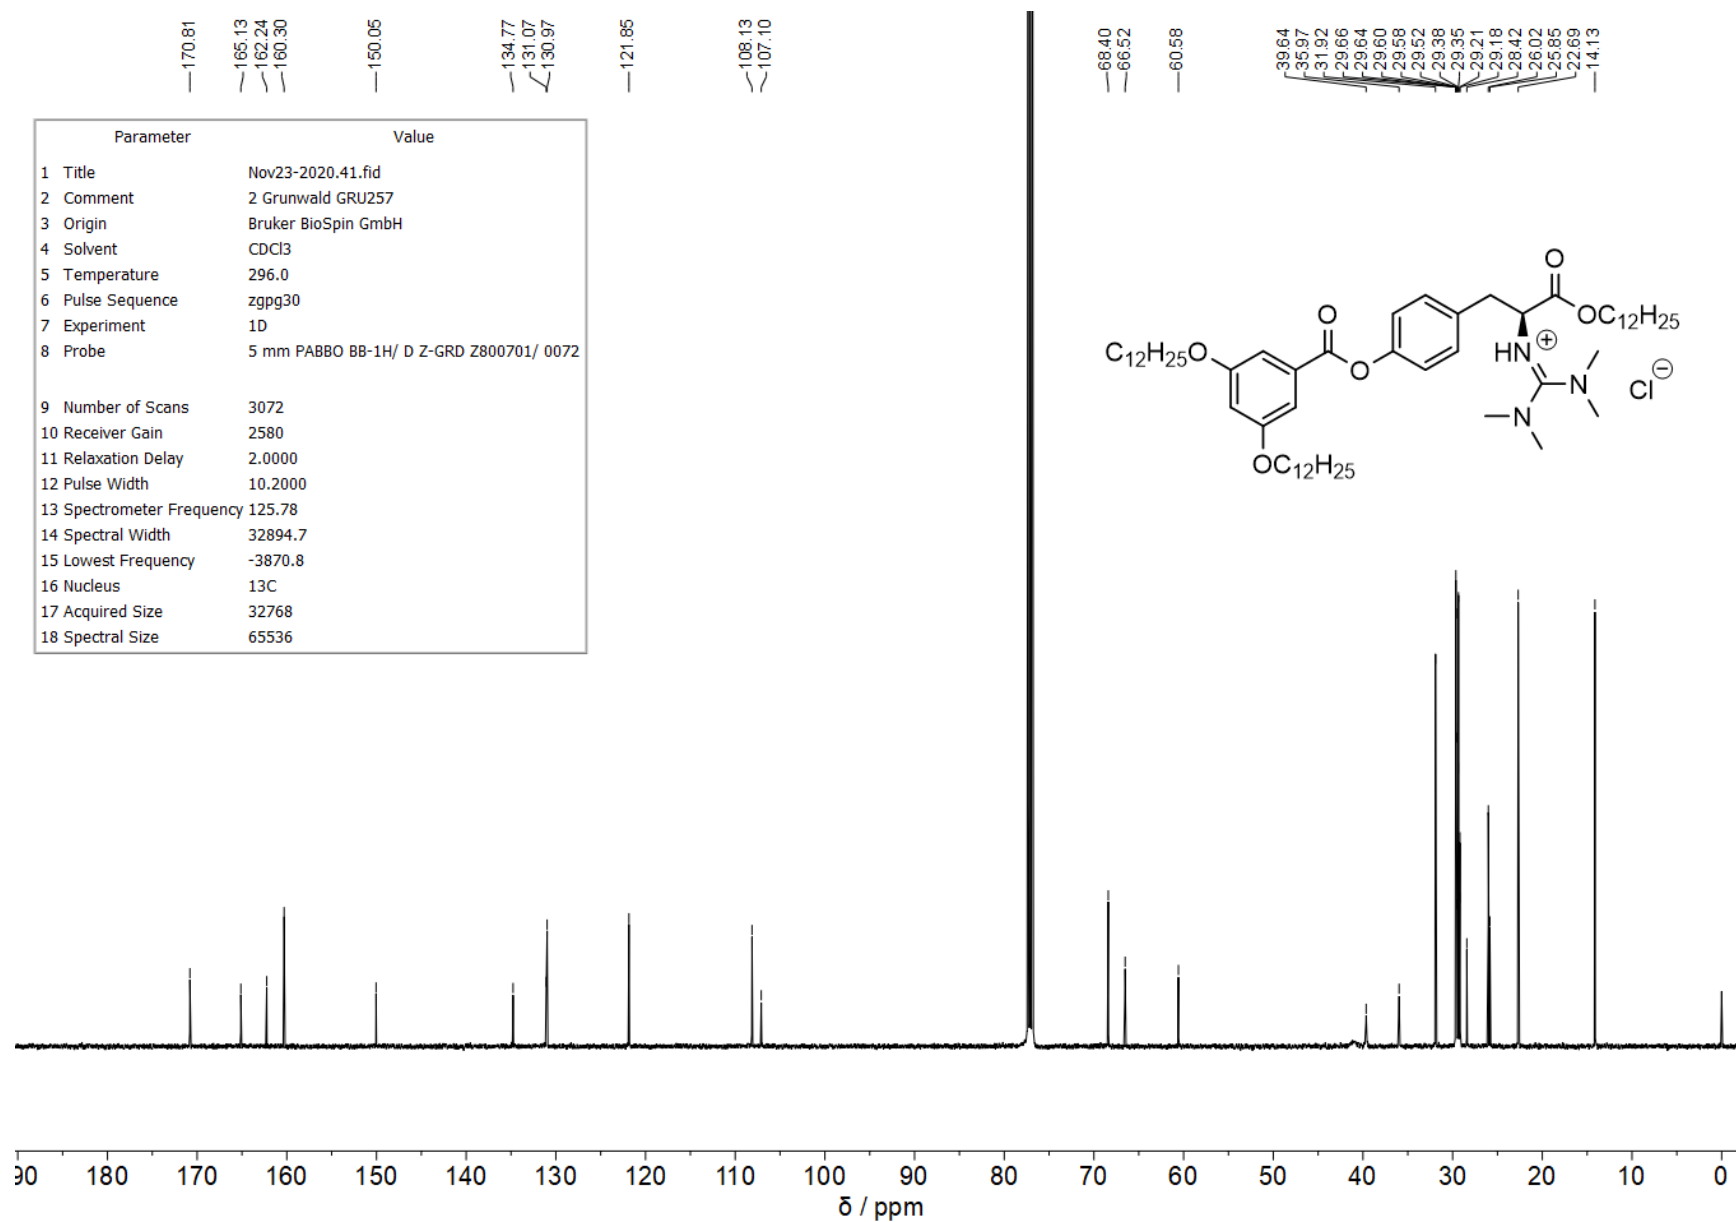

3,5-C<sub>14</sub>TyrC<sub>12</sub>Cl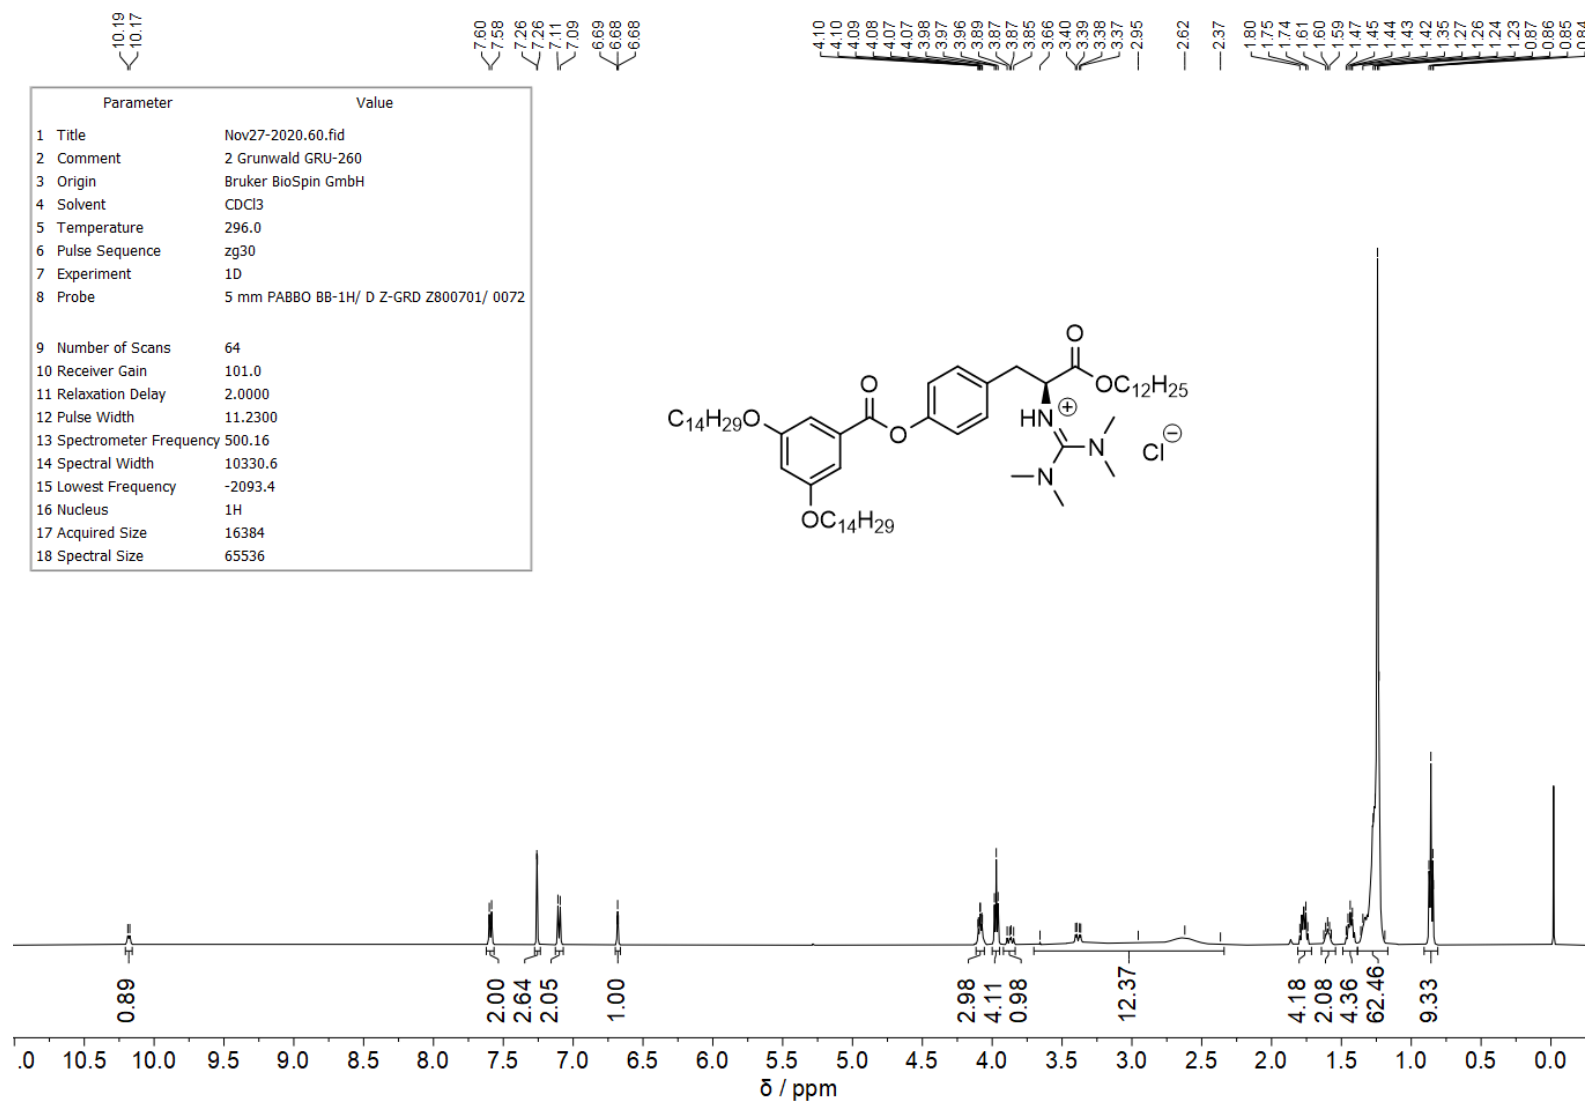

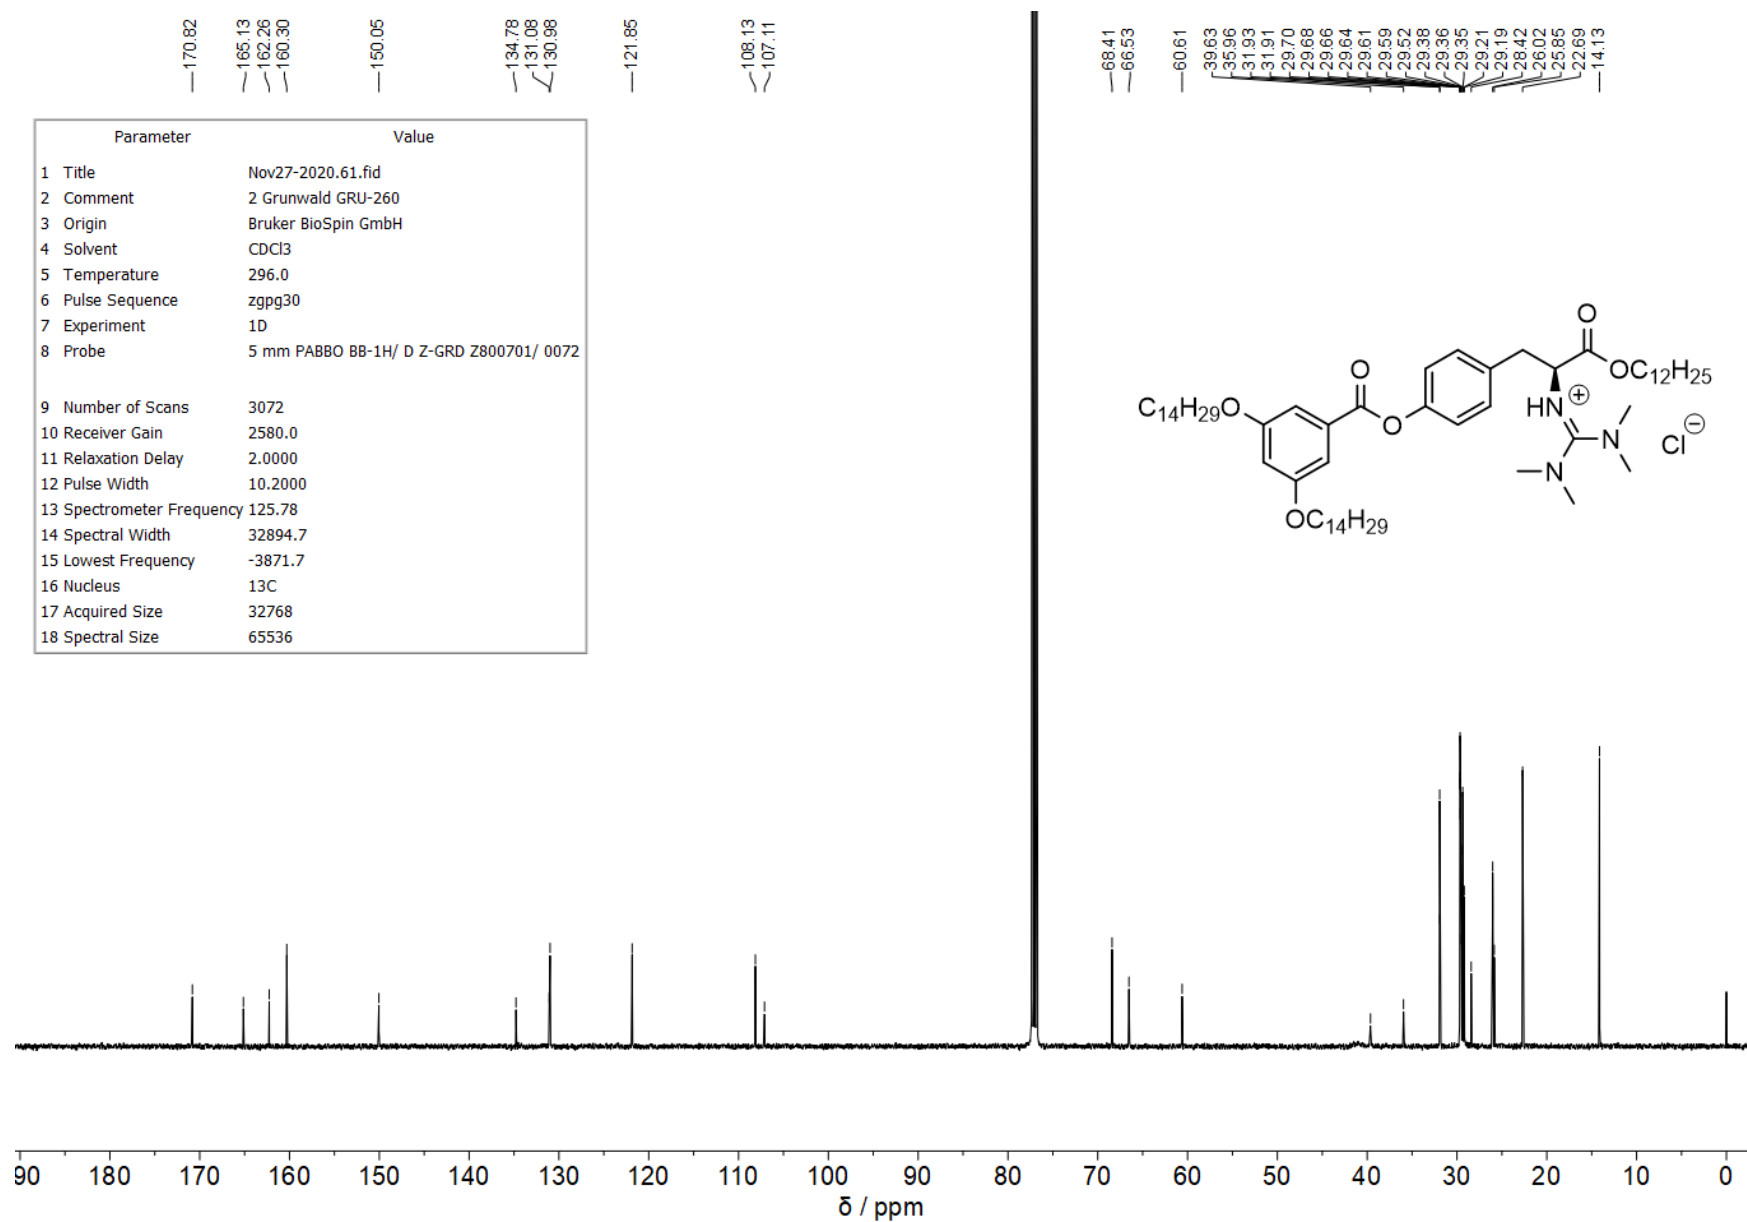

3,5-C<sub>10</sub>TyrC<sub>14</sub>Cl

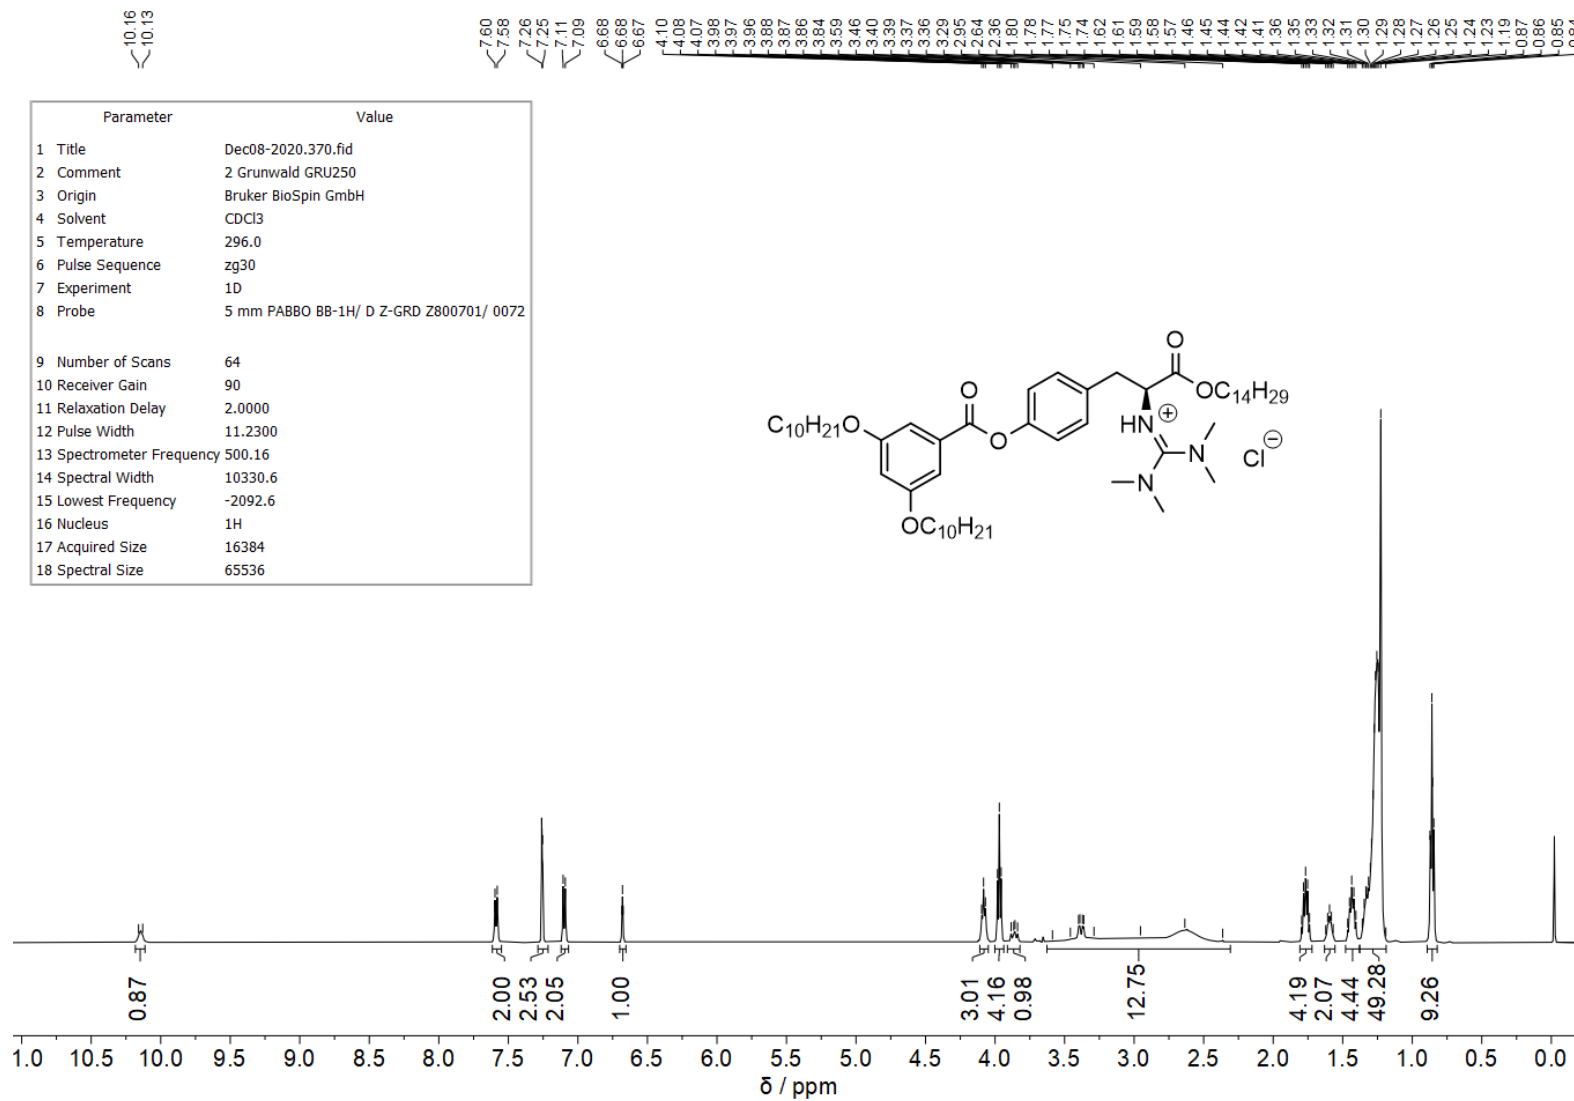

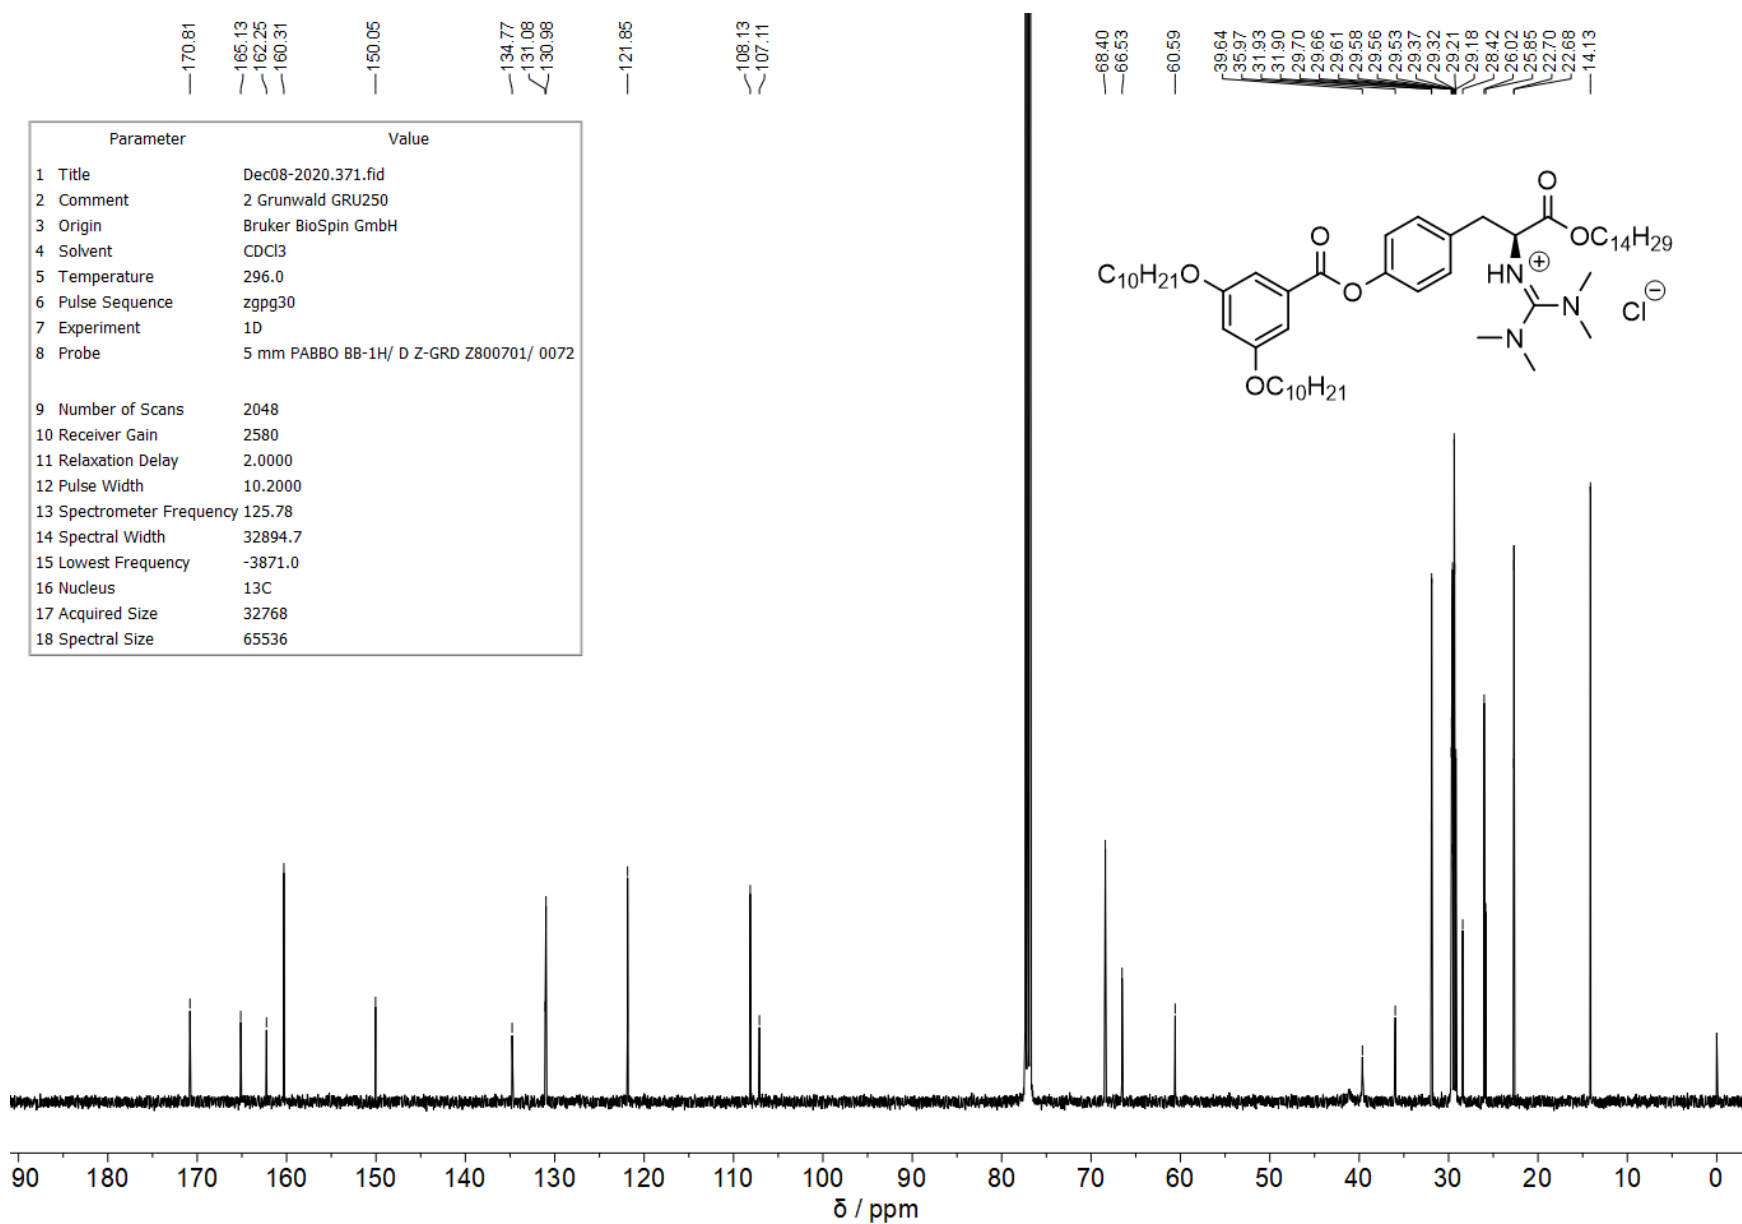

3,5-C<sub>12</sub>TyrC<sub>14</sub>Cl

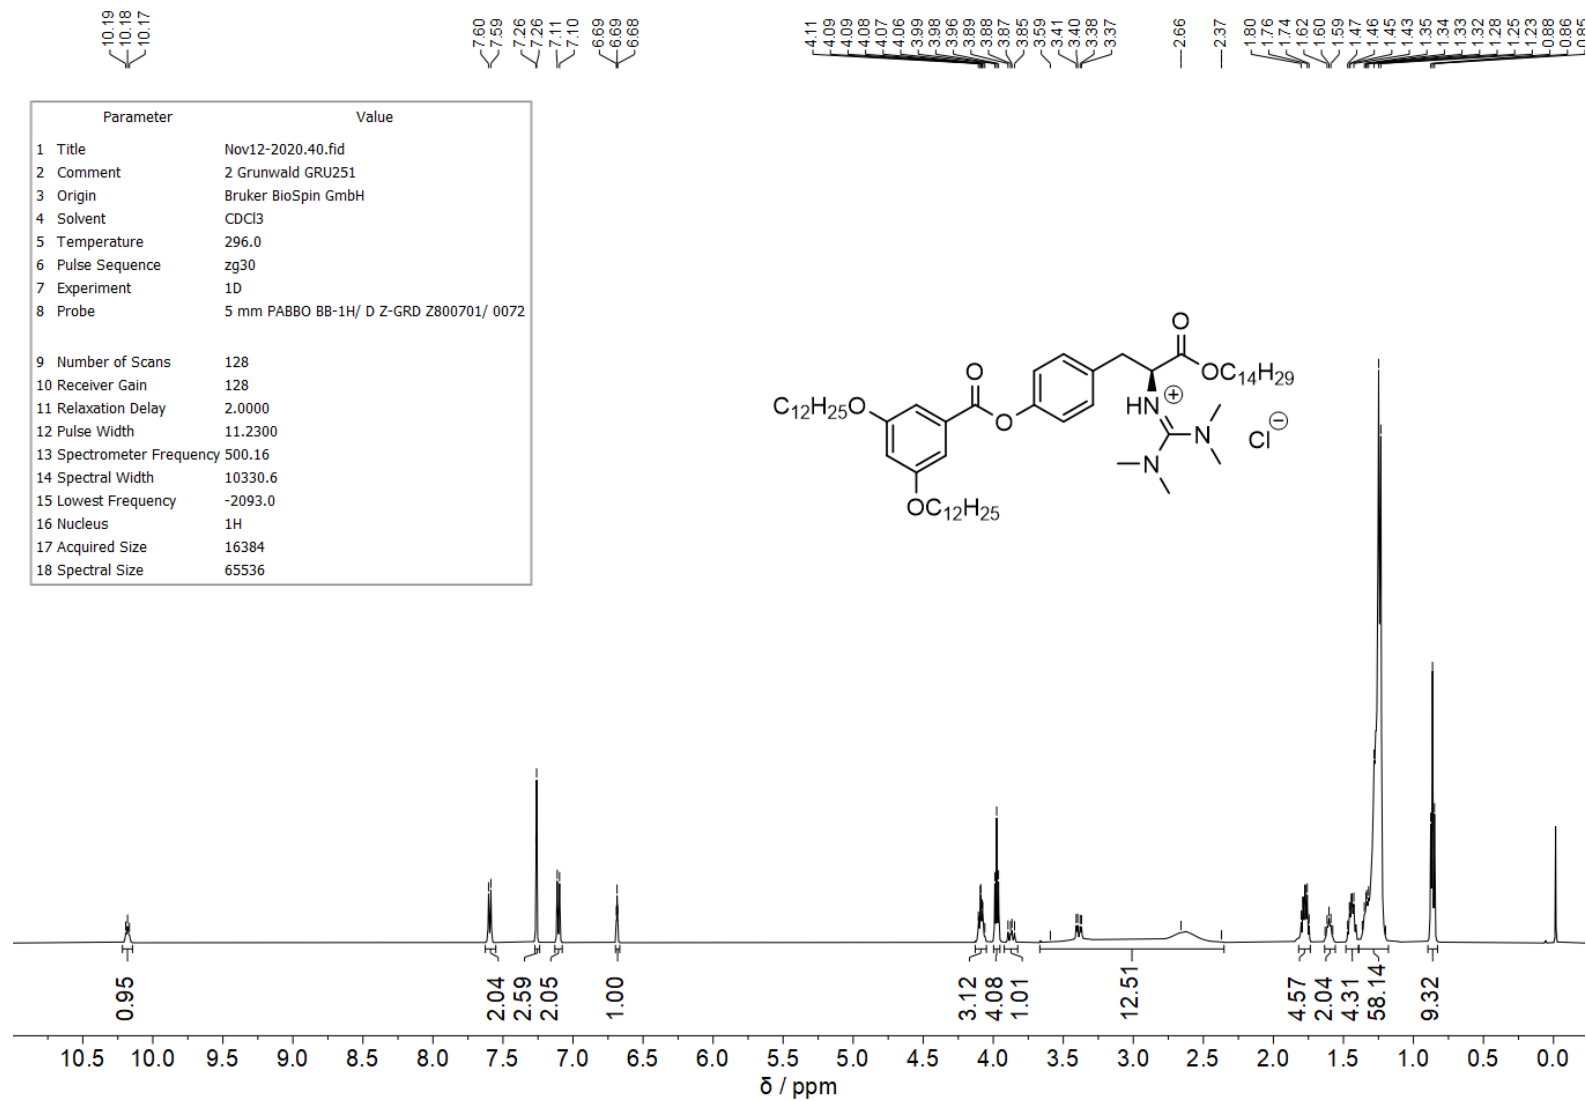

| Parameter                 | Value                                   |
|---------------------------|-----------------------------------------|
| 1 Title                   | Nov12-2020.40.fid                       |
| 2 Comment                 | 2 Grunwald GRU251                       |
| 3 Origin                  | Bruker BioSpin GmbH                     |
| 4 Solvent                 | CDCl <sub>3</sub>                       |
| 5 Temperature             | 296.0                                   |
| 6 Pulse Sequence          | zg30                                    |
| 7 Experiment              | 1D                                      |
| 8 Probe                   | 5 mm PABBO BB-1H/ D Z-GRD Z800701/ 0072 |
| 9 Number of Scans         | 128                                     |
| 10 Receiver Gain          | 128                                     |
| 11 Relaxation Delay       | 2.0000                                  |
| 12 Pulse Width            | 11.2300                                 |
| 13 Spectrometer Frequency | 500.16                                  |
| 14 Spectral Width         | 10330.6                                 |
| 15 Lowest Frequency       | -2093.0                                 |
| 16 Nucleus                | 1H                                      |
| 17 Acquired Size          | 16384                                   |
| 18 Spectral Size          | 65536                                   |

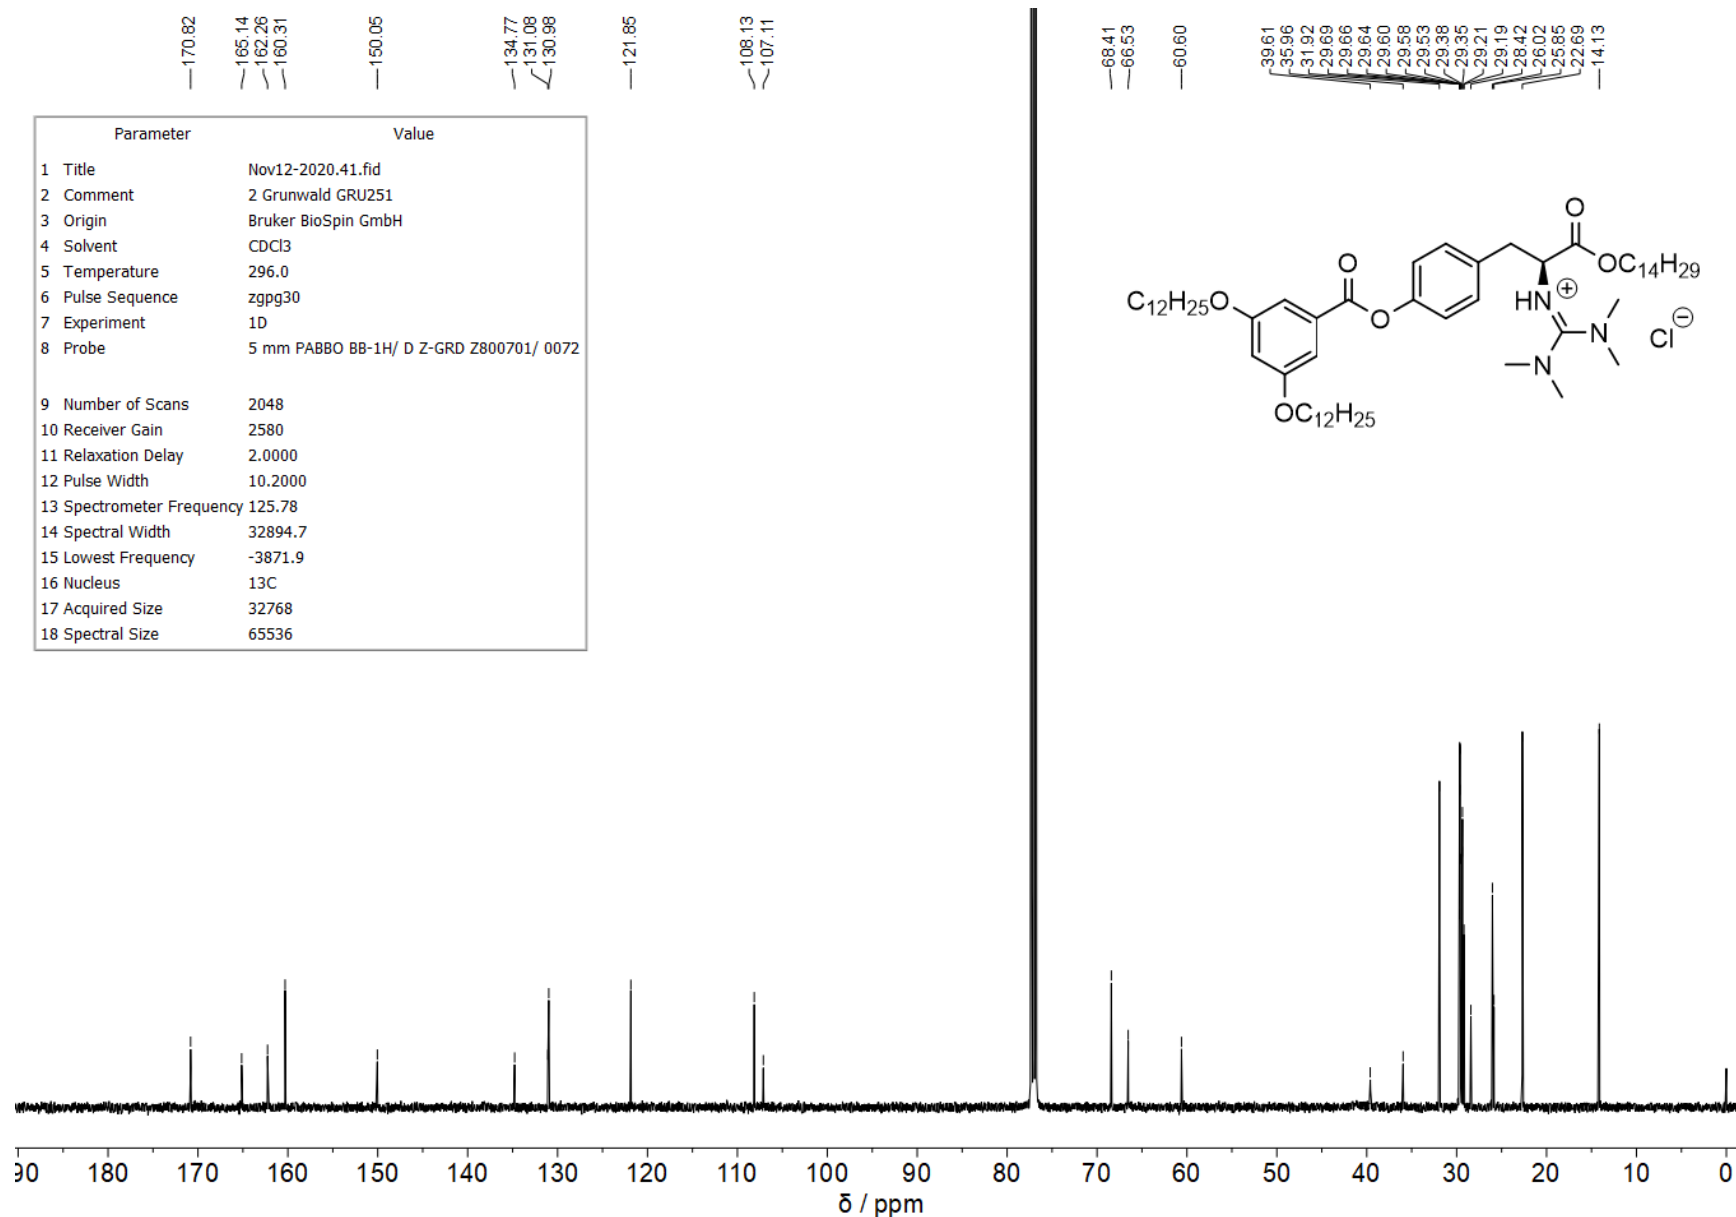

| Parameter                 | Value                                   |
|---------------------------|-----------------------------------------|
| 1 Title                   | Nov12-2020.41.fid                       |
| 2 Comment                 | 2 Grunwald GRU251                       |
| 3 Origin                  | Bruker BioSpin GmbH                     |
| 4 Solvent                 | CDCl3                                   |
| 5 Temperature             | 296.0                                   |
| 6 Pulse Sequence          | zgpg30                                  |
| 7 Experiment              | 1D                                      |
| 8 Probe                   | 5 mm PABBO BB-1H/ D Z-GRD Z800701/ 0072 |
| 9 Number of Scans         | 2048                                    |
| 10 Receiver Gain          | 2580                                    |
| 11 Relaxation Delay       | 2.0000                                  |
| 12 Pulse Width            | 10.2000                                 |
| 13 Spectrometer Frequency | 125.78                                  |
| 14 Spectral Width         | 32894.7                                 |
| 15 Lowest Frequency       | -3871.9                                 |
| 16 Nucleus                | 13C                                     |
| 17 Acquired Size          | 32768                                   |
| 18 Spectral Size          | 65536                                   |

3,5-C<sub>14</sub>TyrC<sub>14</sub>Cl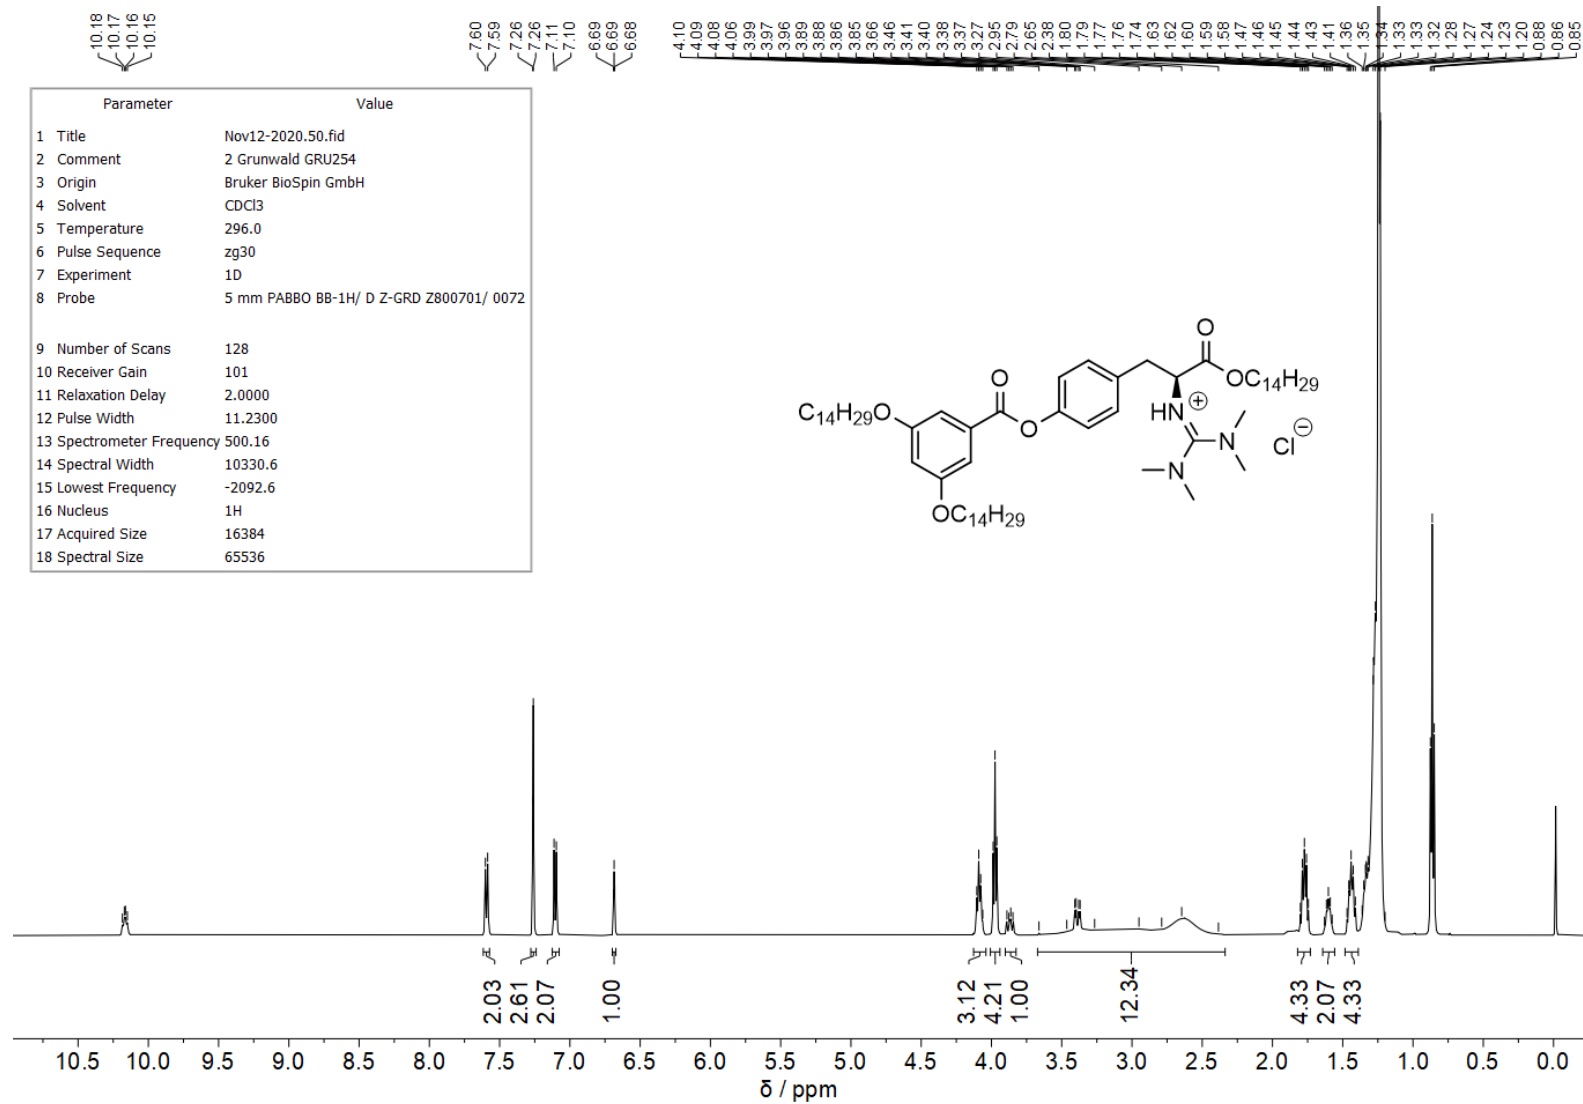



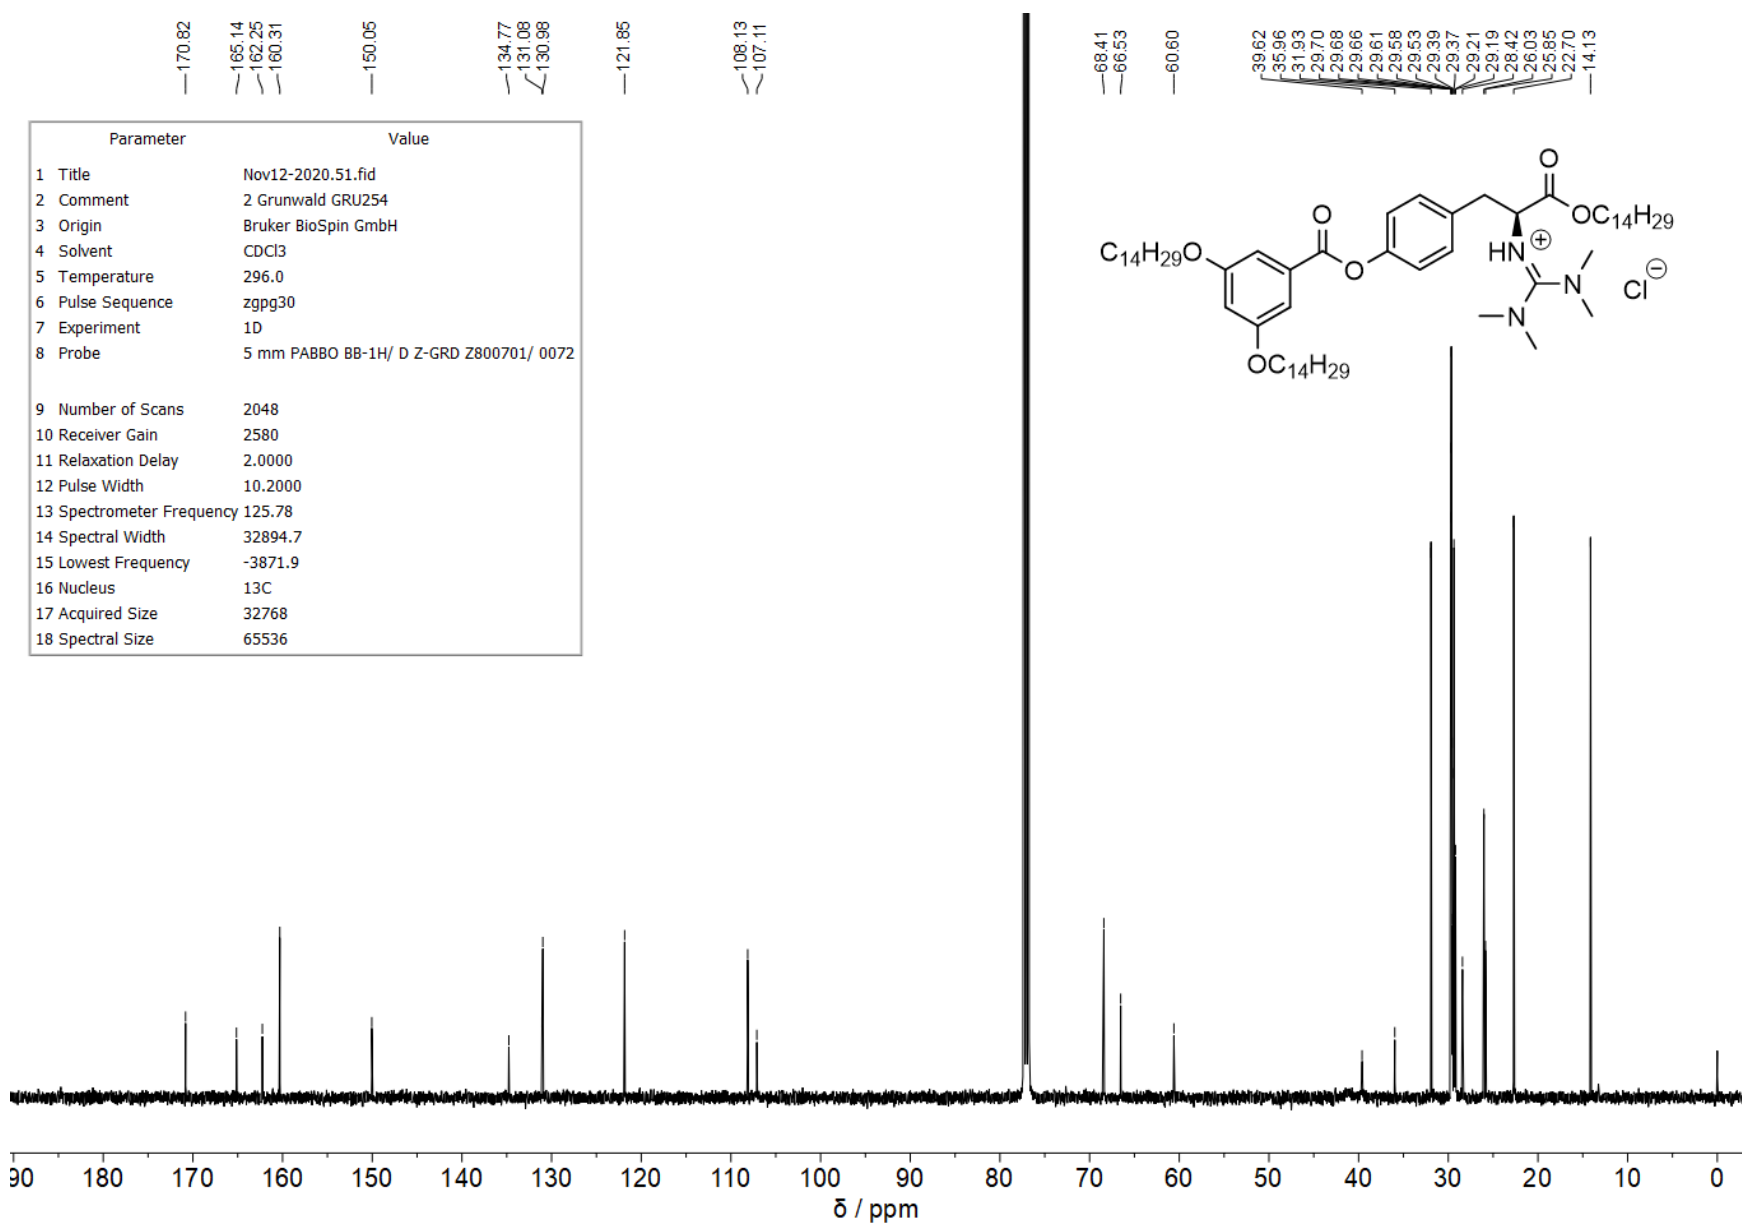

| Parameter                 | Value                                   |
|---------------------------|-----------------------------------------|
| 1 Title                   | Nov12-2020.51.fid                       |
| 2 Comment                 | 2 Grunwald GRU254                       |
| 3 Origin                  | Bruker BioSpin GmbH                     |
| 4 Solvent                 | CDCl3                                   |
| 5 Temperature             | 296.0                                   |
| 6 Pulse Sequence          | zgpg30                                  |
| 7 Experiment              | 1D                                      |
| 8 Probe                   | 5 mm PABBO BB-1H/ D Z-GRD Z800701/ 0072 |
| 9 Number of Scans         | 2048                                    |
| 10 Receiver Gain          | 2580                                    |
| 11 Relaxation Delay       | 2.0000                                  |
| 12 Pulse Width            | 10.2000                                 |
| 13 Spectrometer Frequency | 125.78                                  |
| 14 Spectral Width         | 32894.7                                 |
| 15 Lowest Frequency       | -3871.9                                 |
| 16 Nucleus                | 13C                                     |
| 17 Acquired Size          | 32768                                   |
| 18 Spectral Size          | 65536                                   |

3,4,5-C<sub>10</sub>TyrC<sub>10</sub>Cl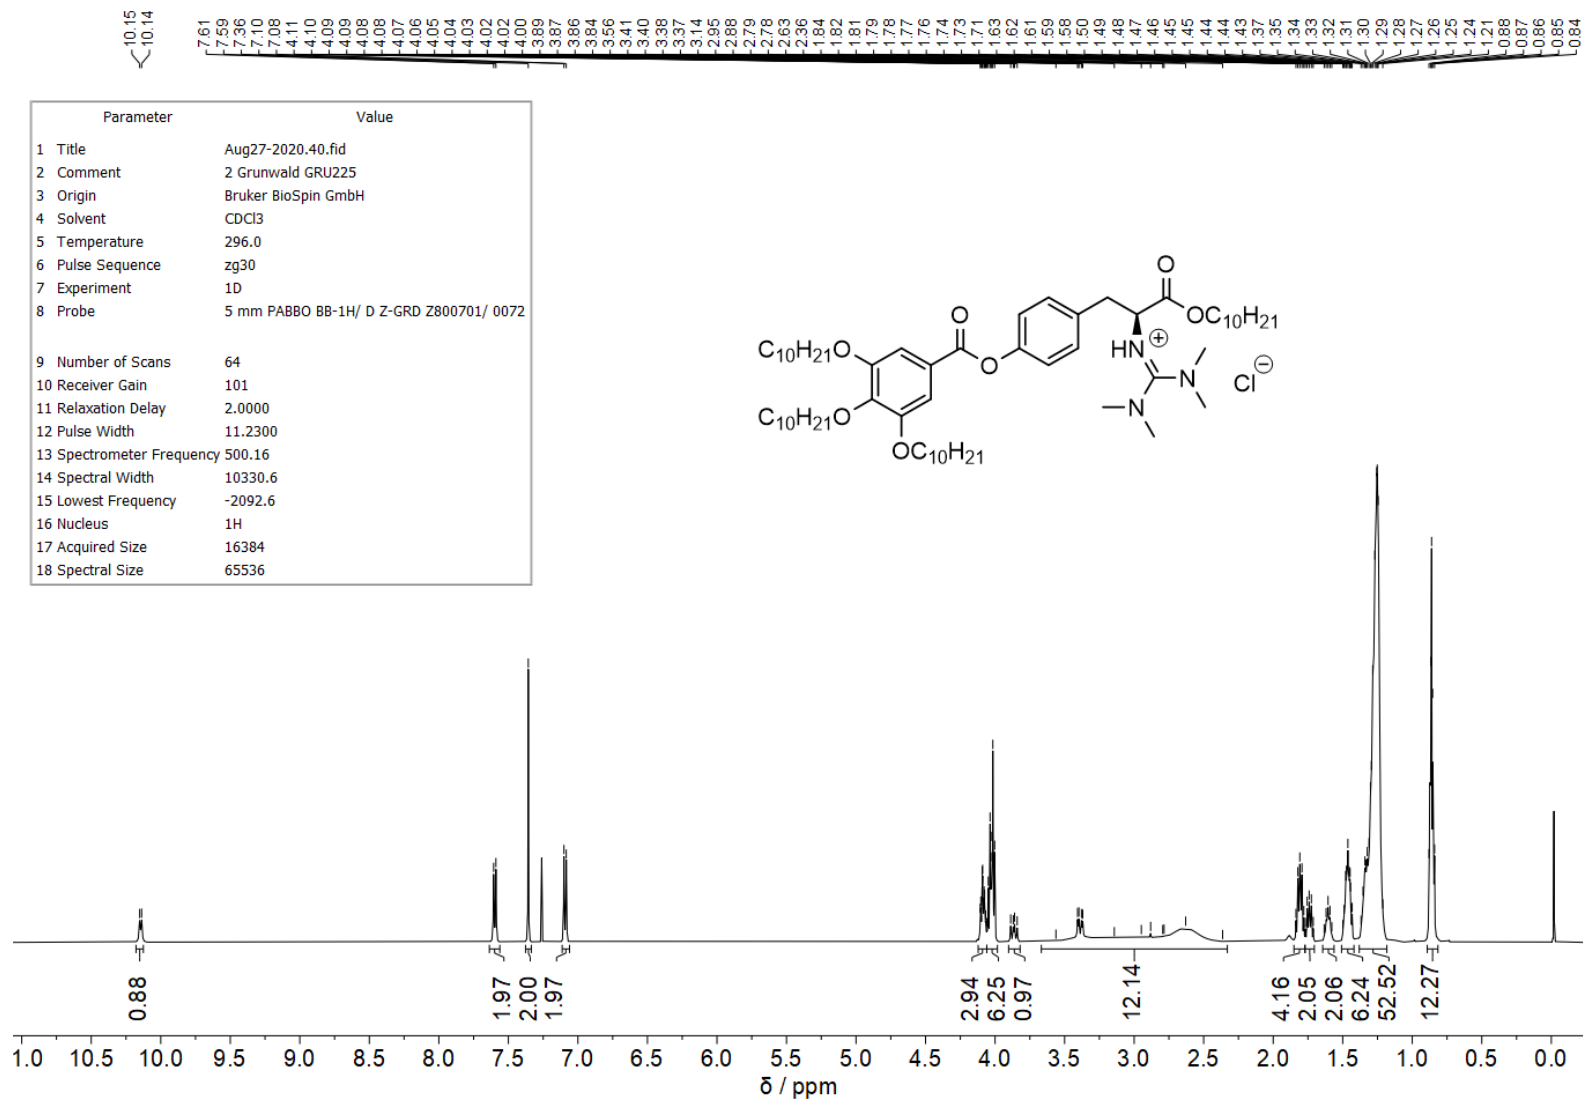

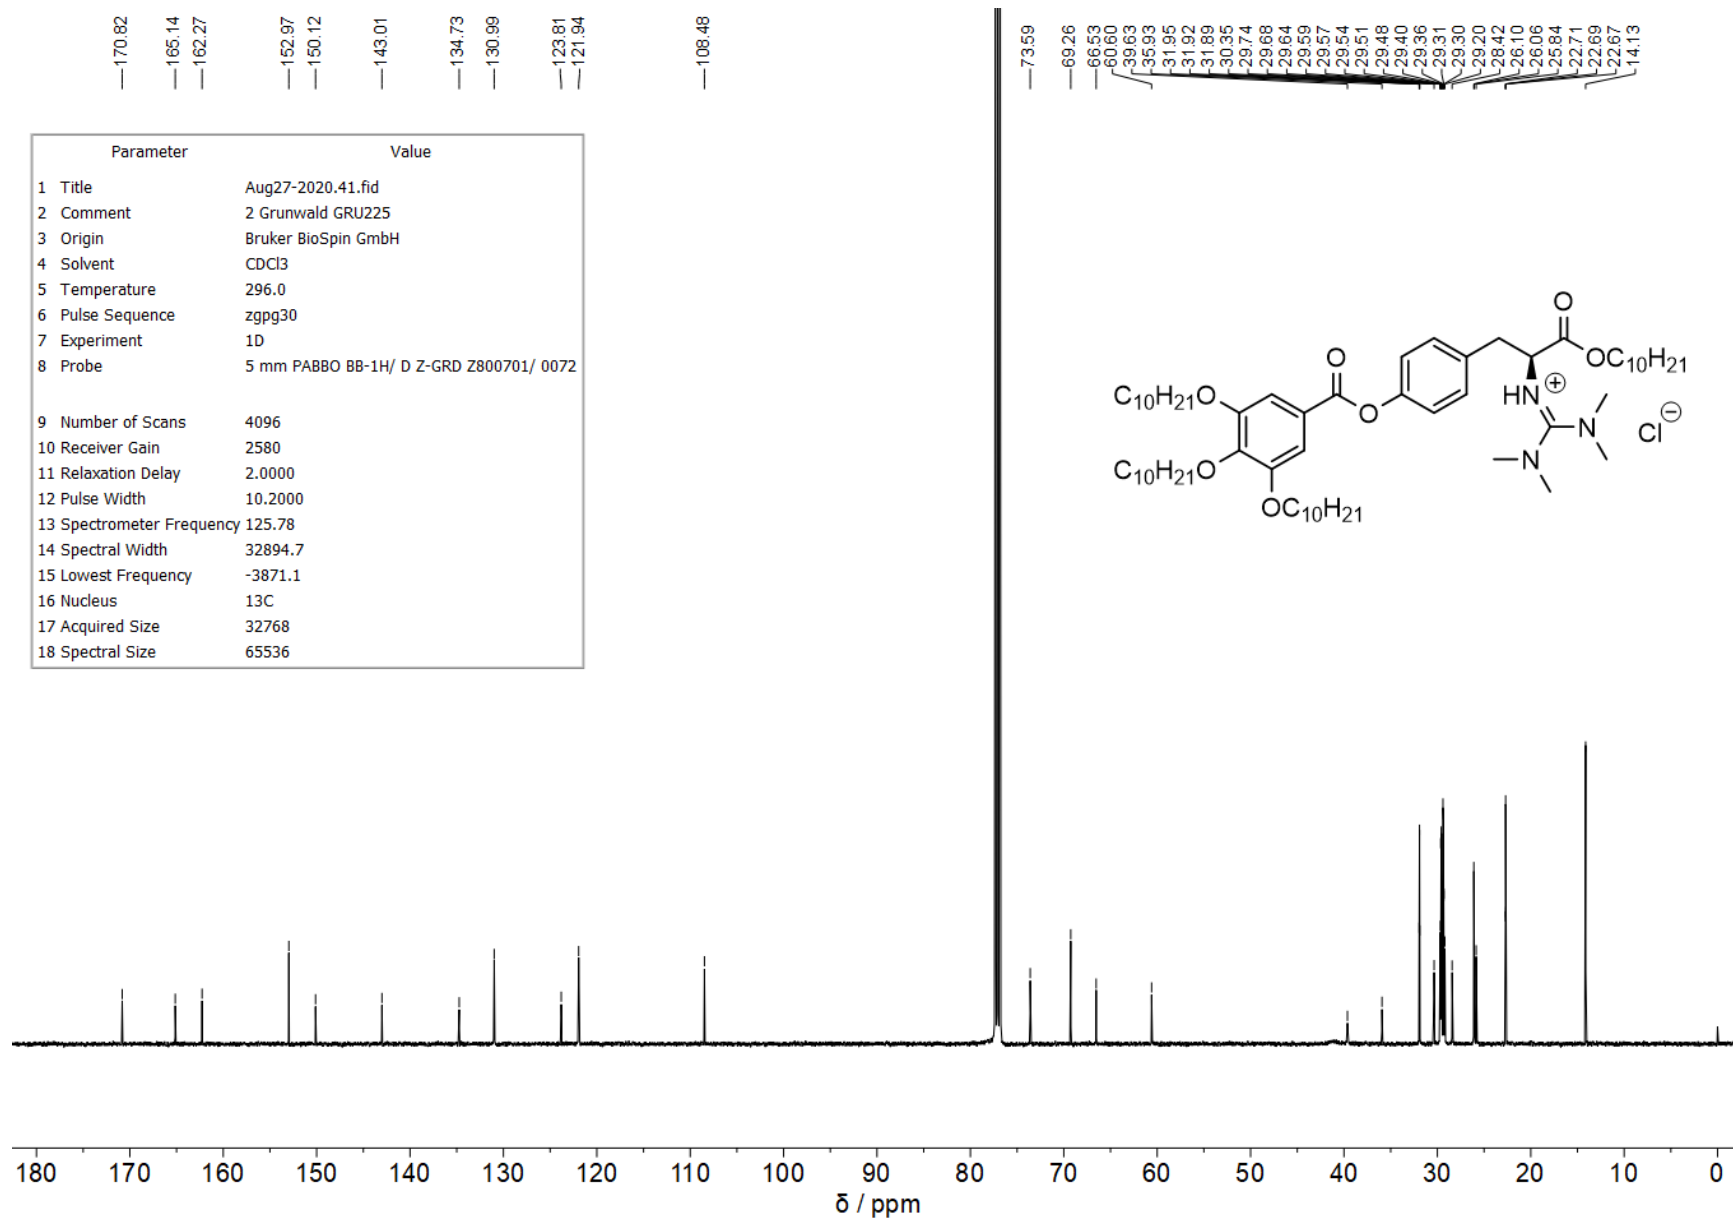

3,4,5-C<sub>12</sub>TyrC<sub>10</sub>Cl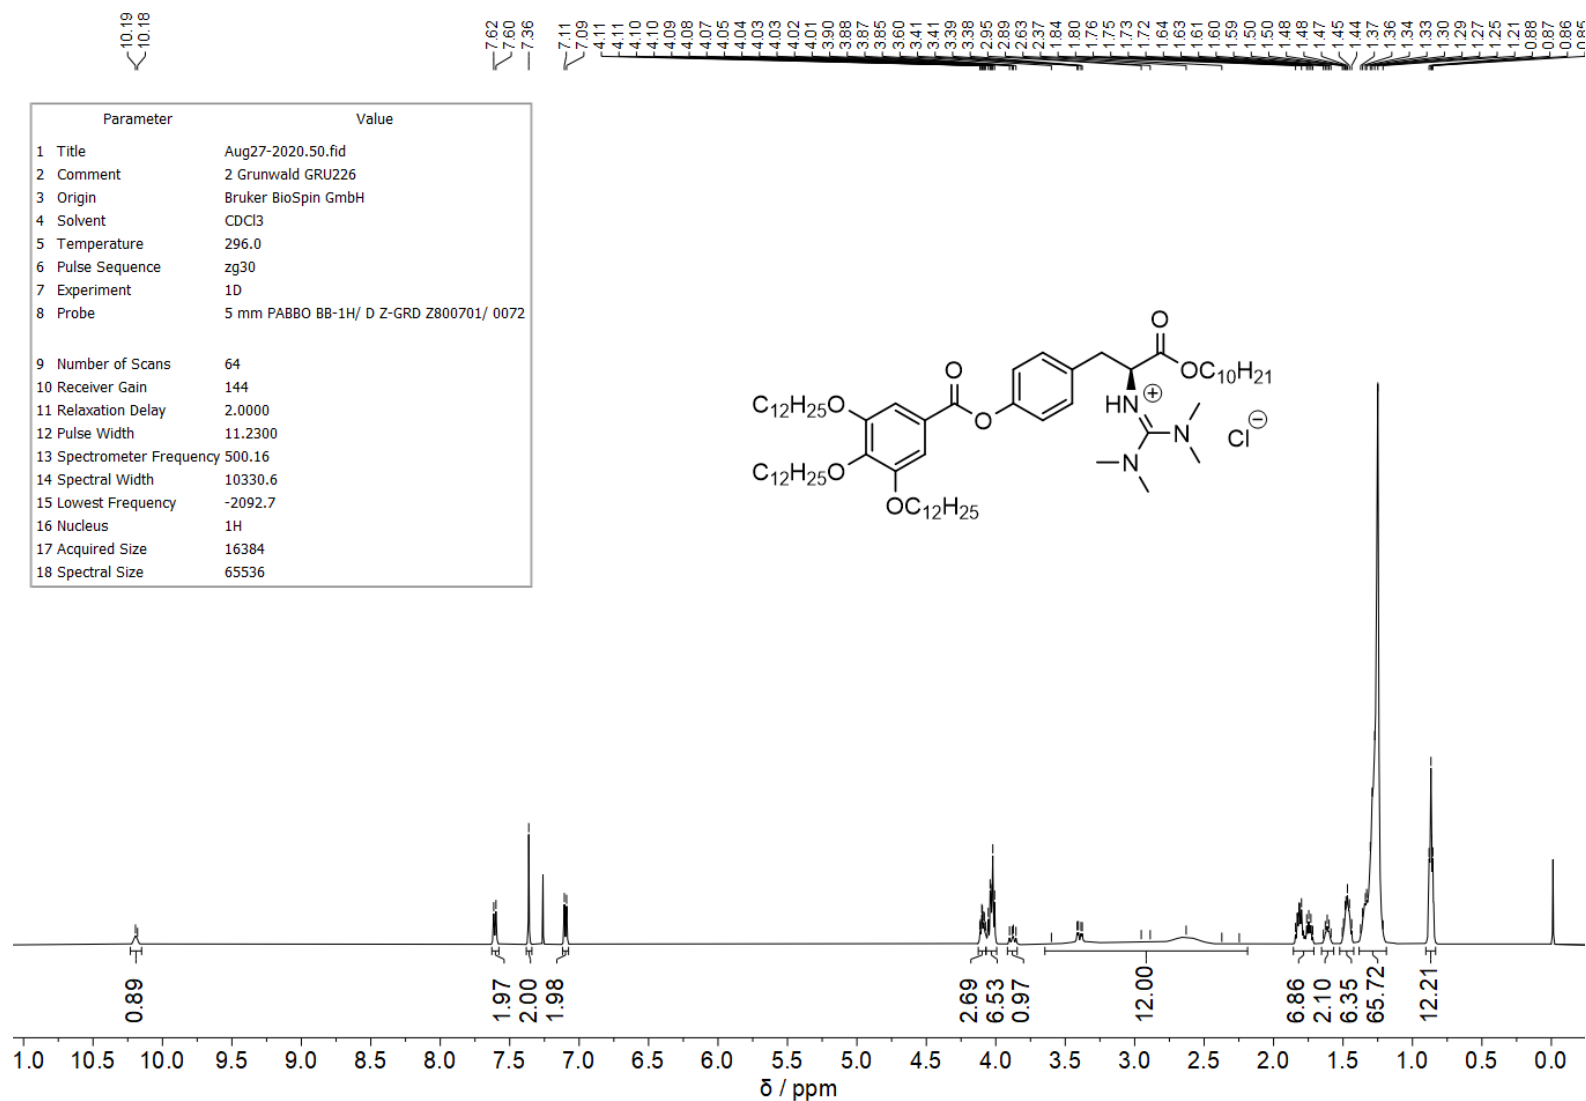

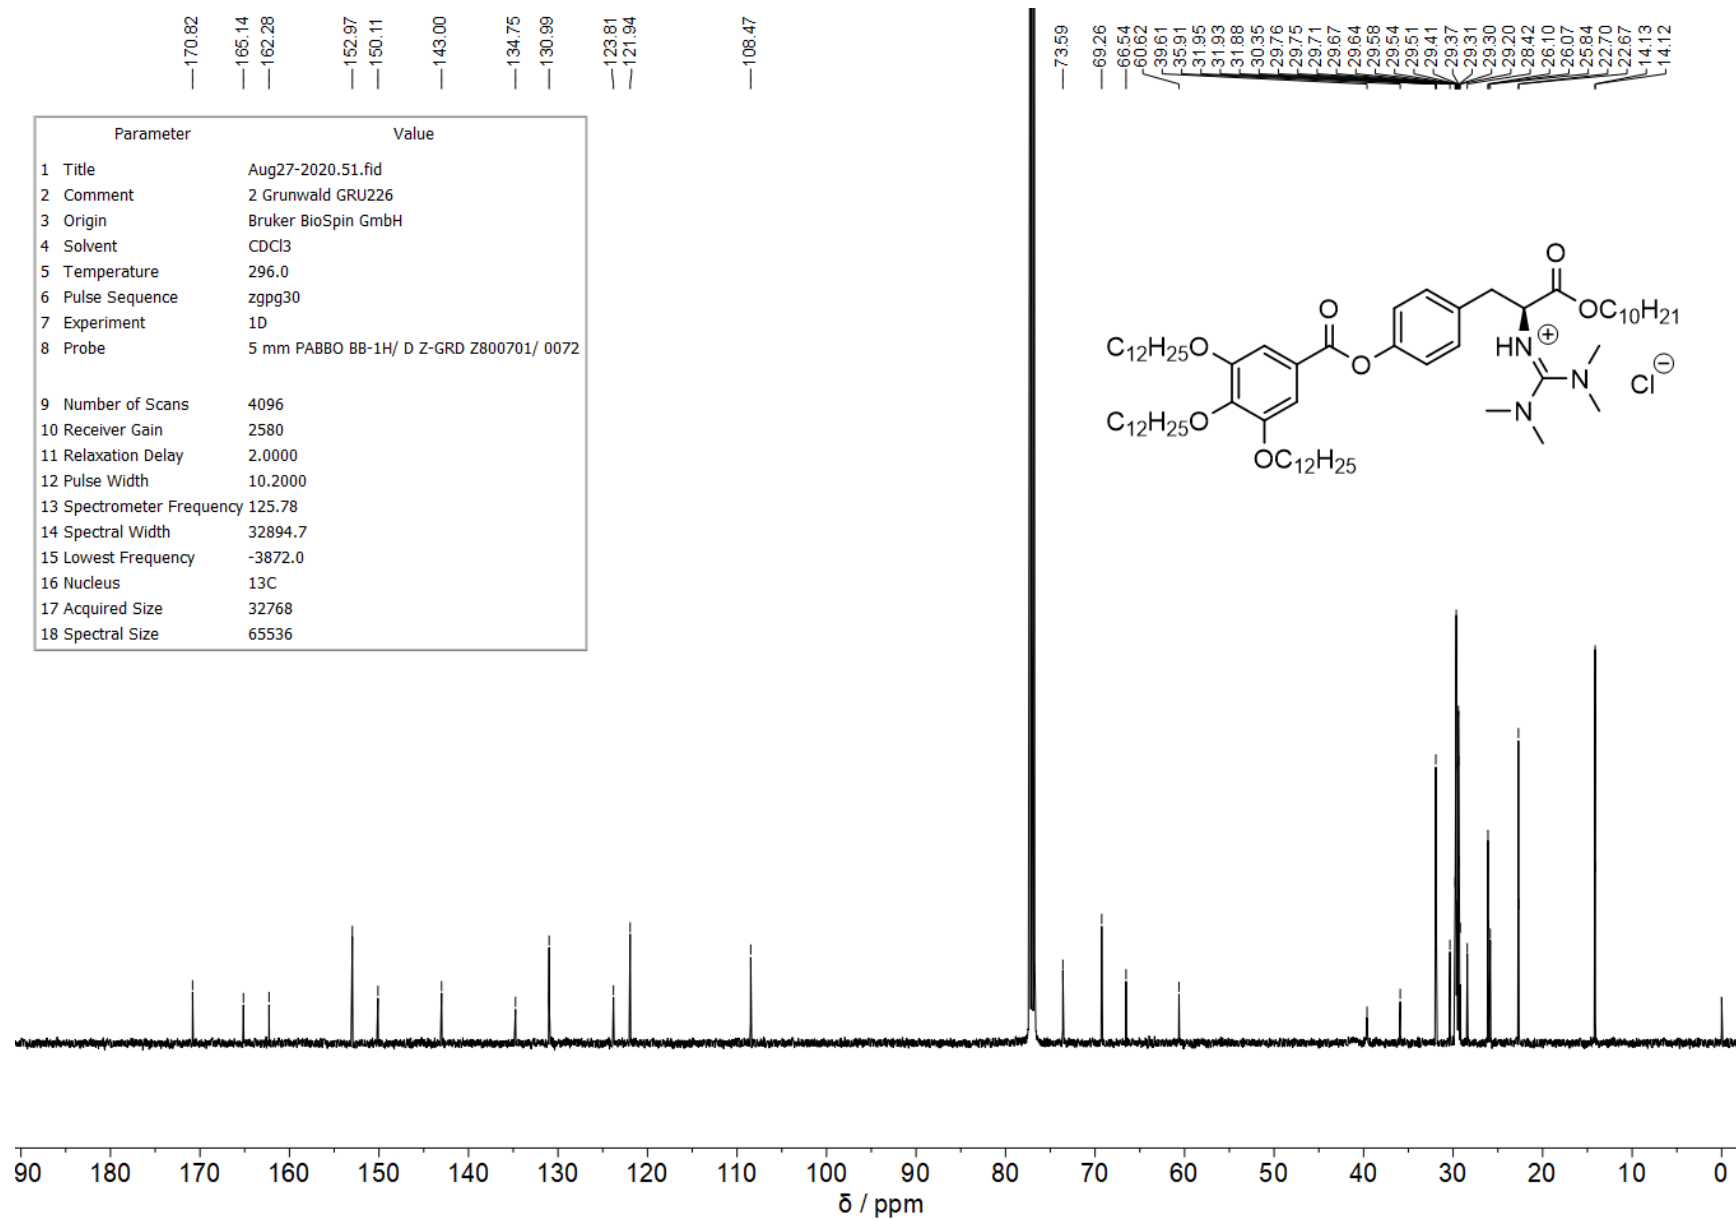

3,4,5-C<sub>14</sub>TyrC<sub>10</sub>Cl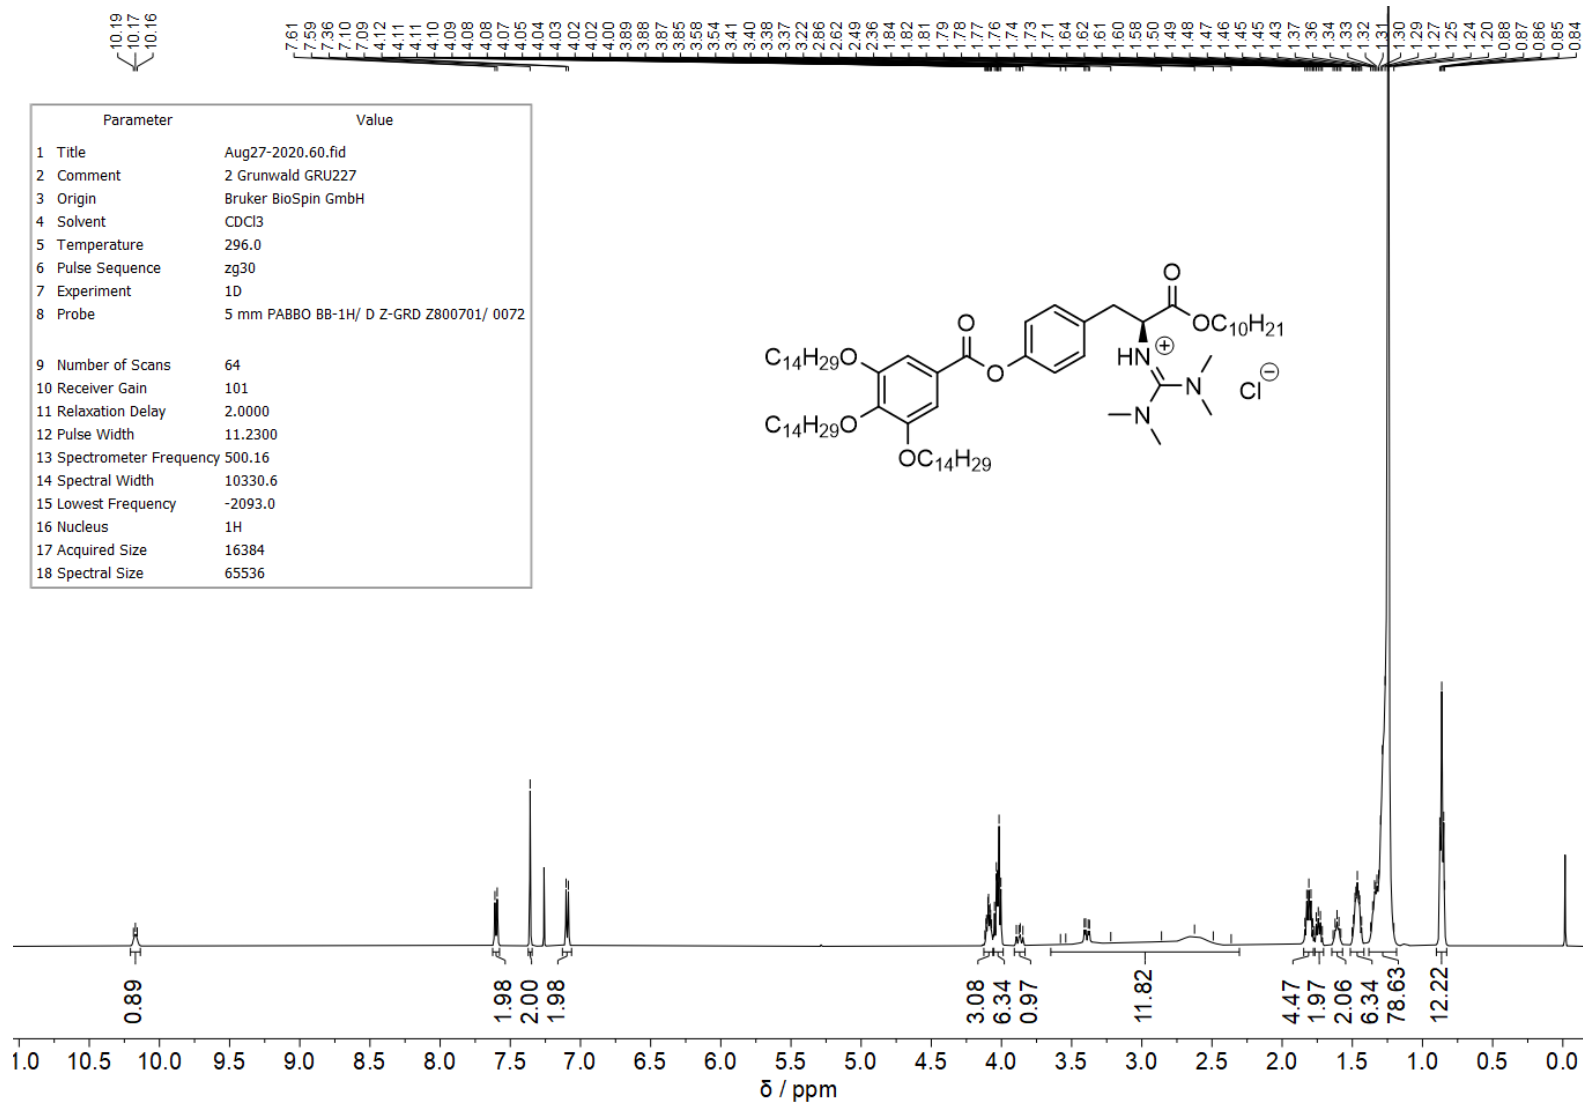

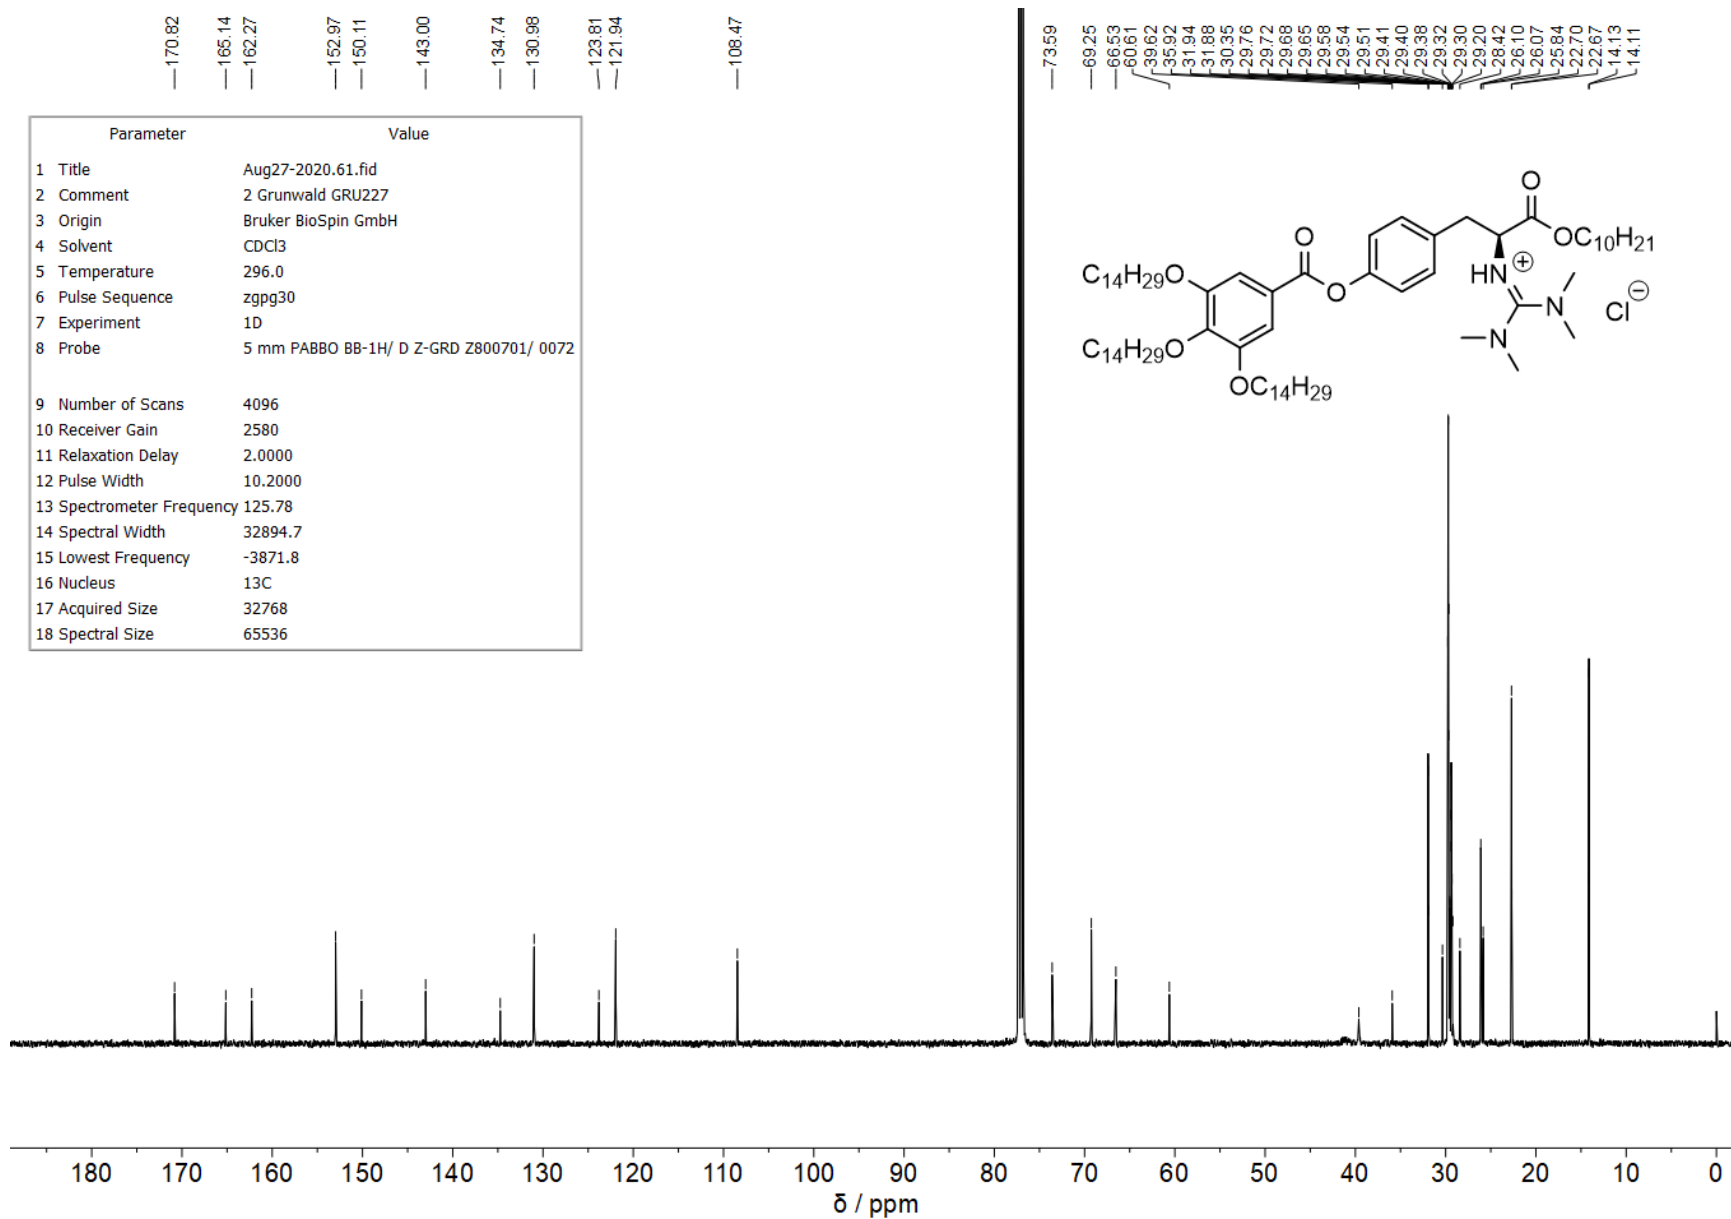

3,4,5-C<sub>10</sub>TyrC<sub>12</sub>Cl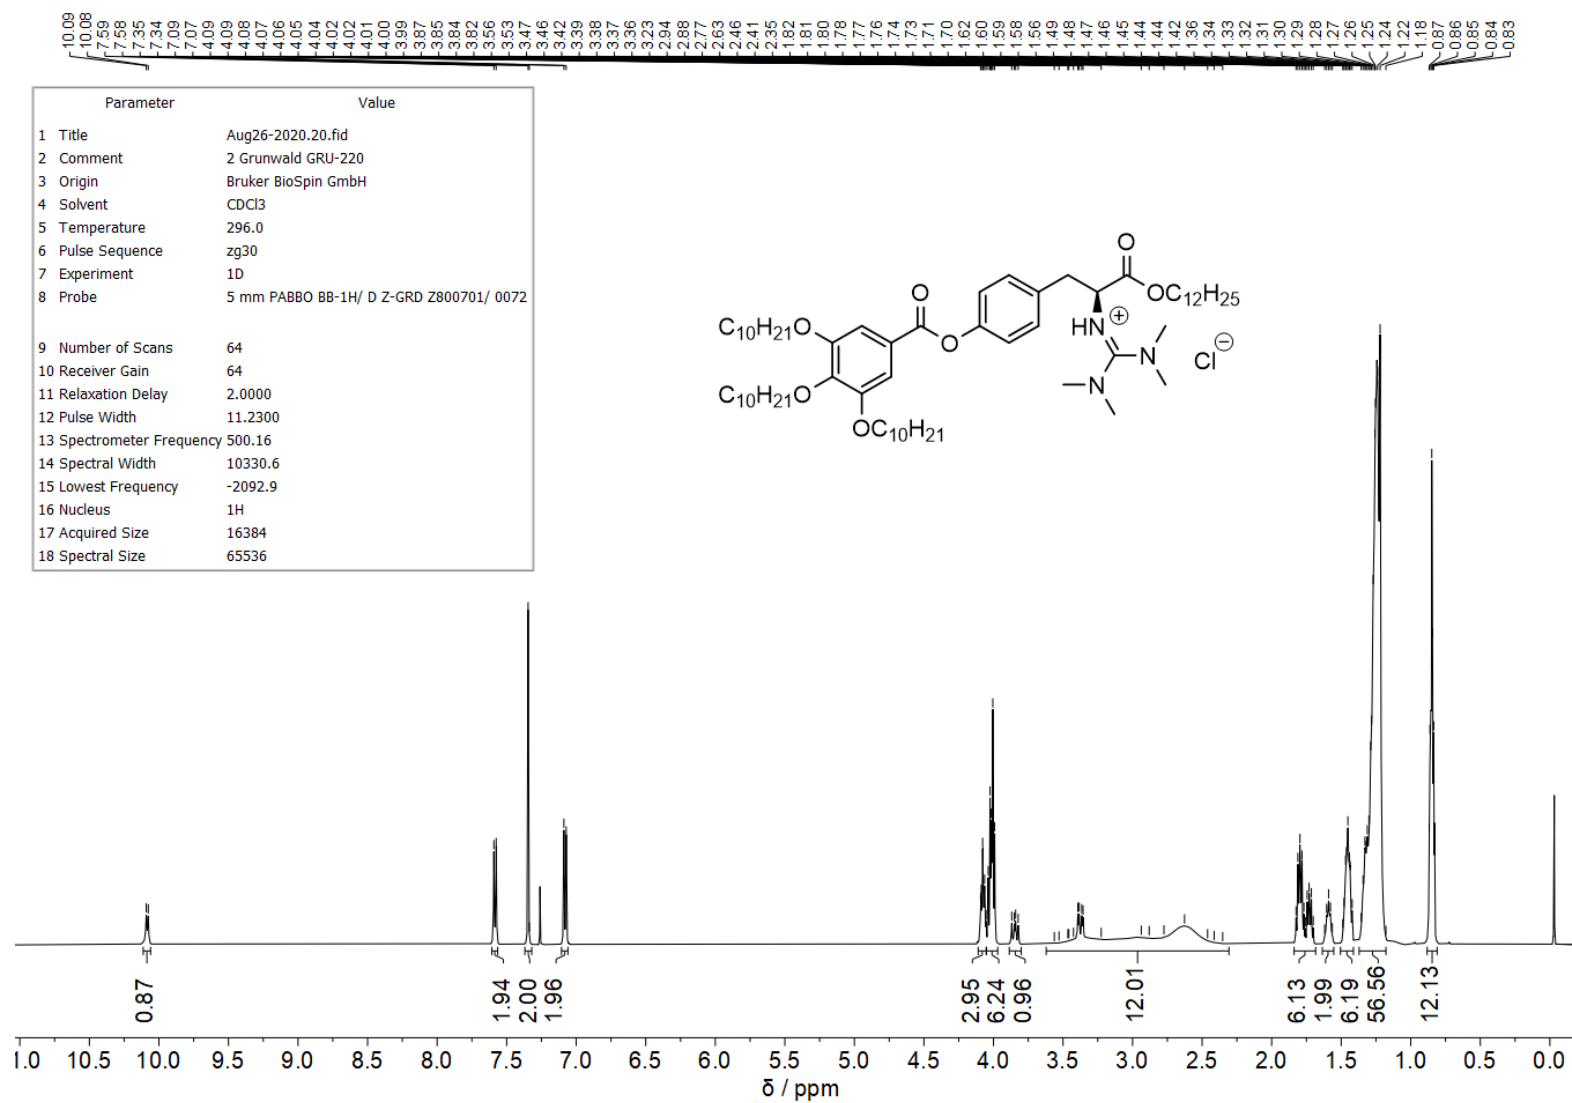



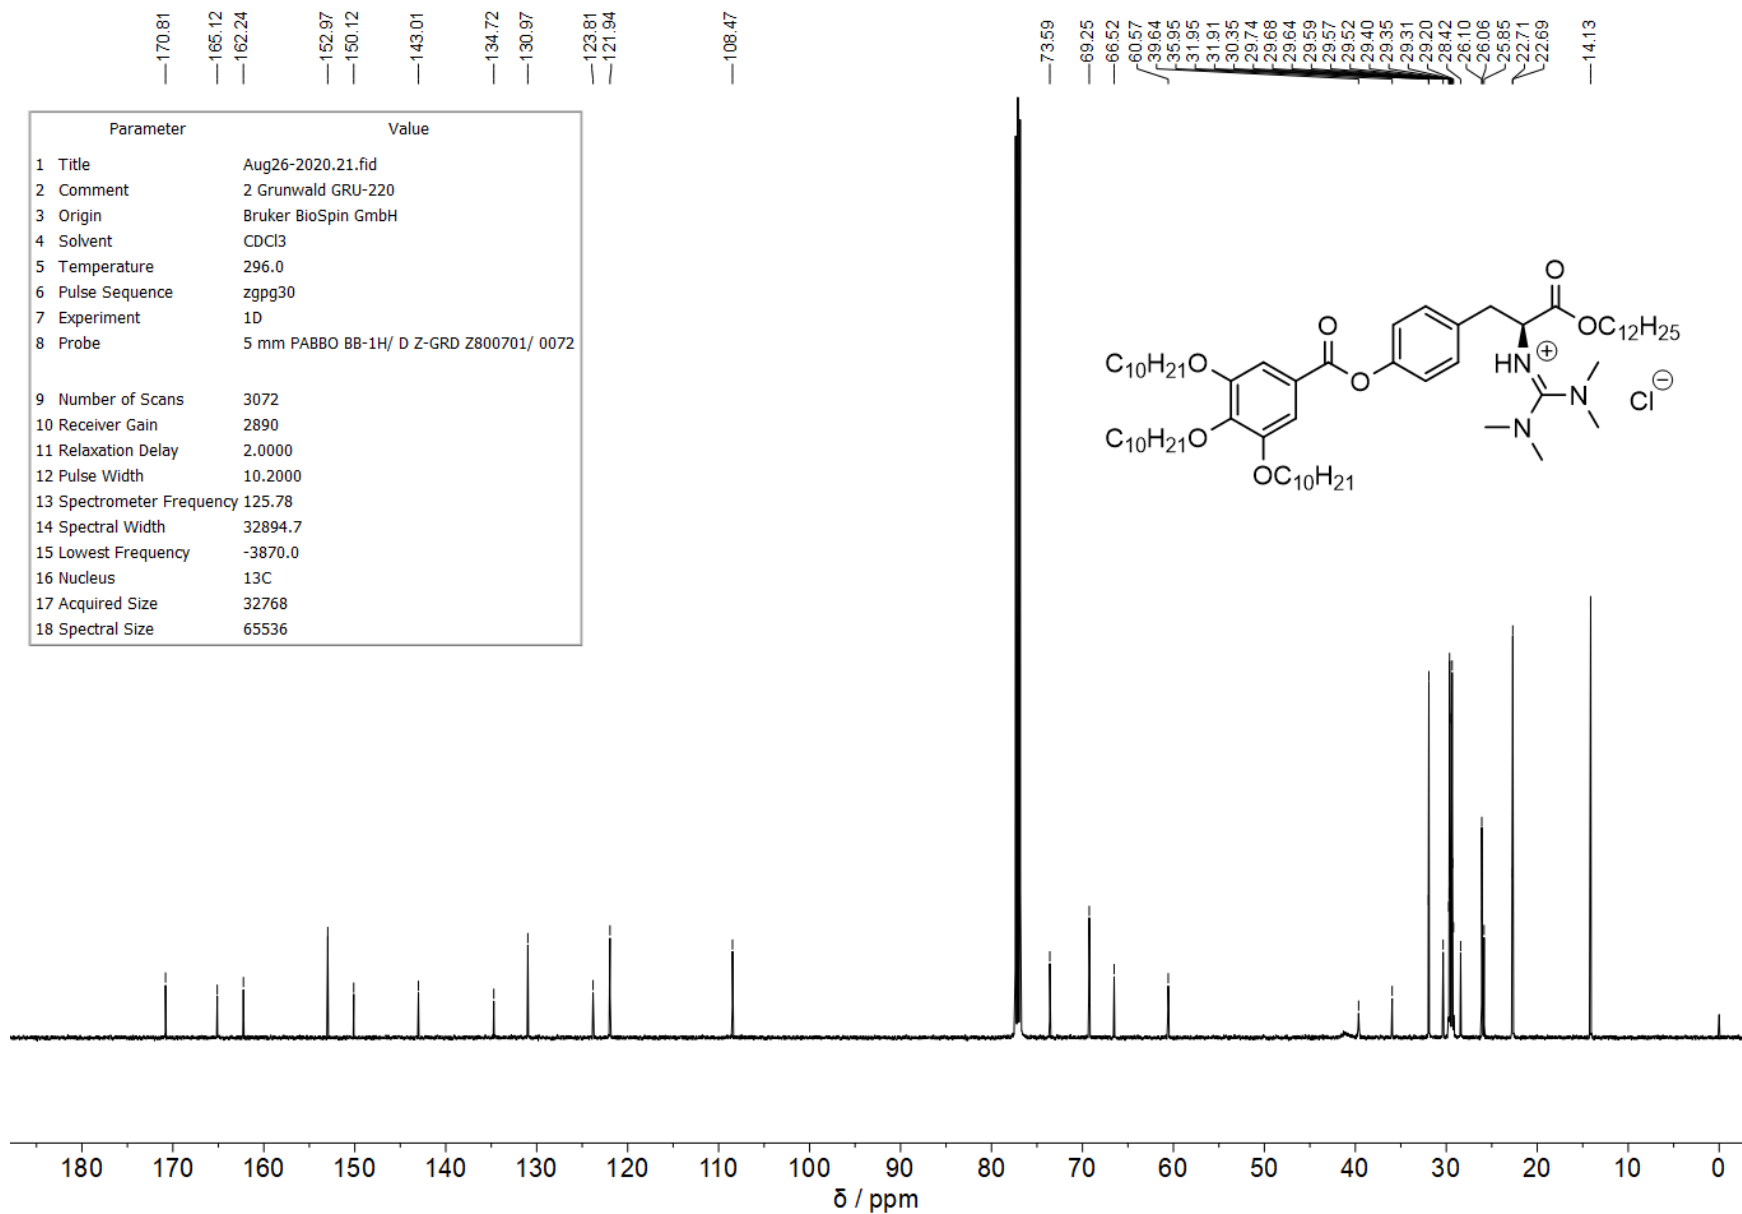

## 3,4,5-C12TyrC12Cl

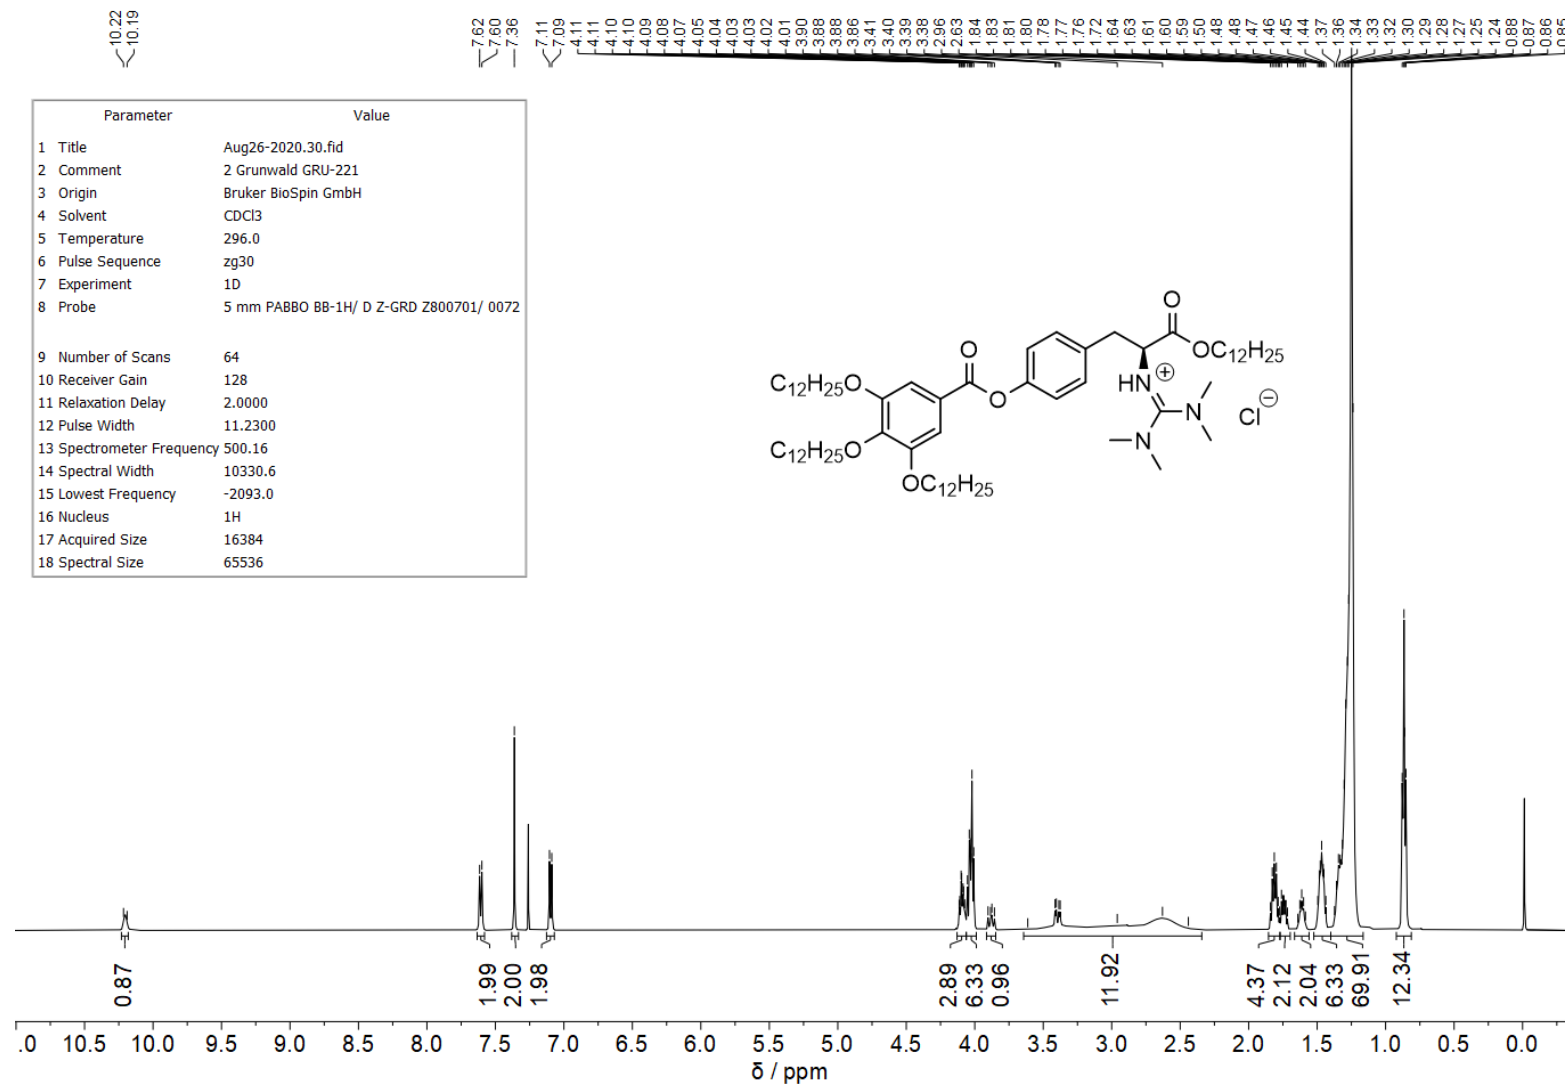

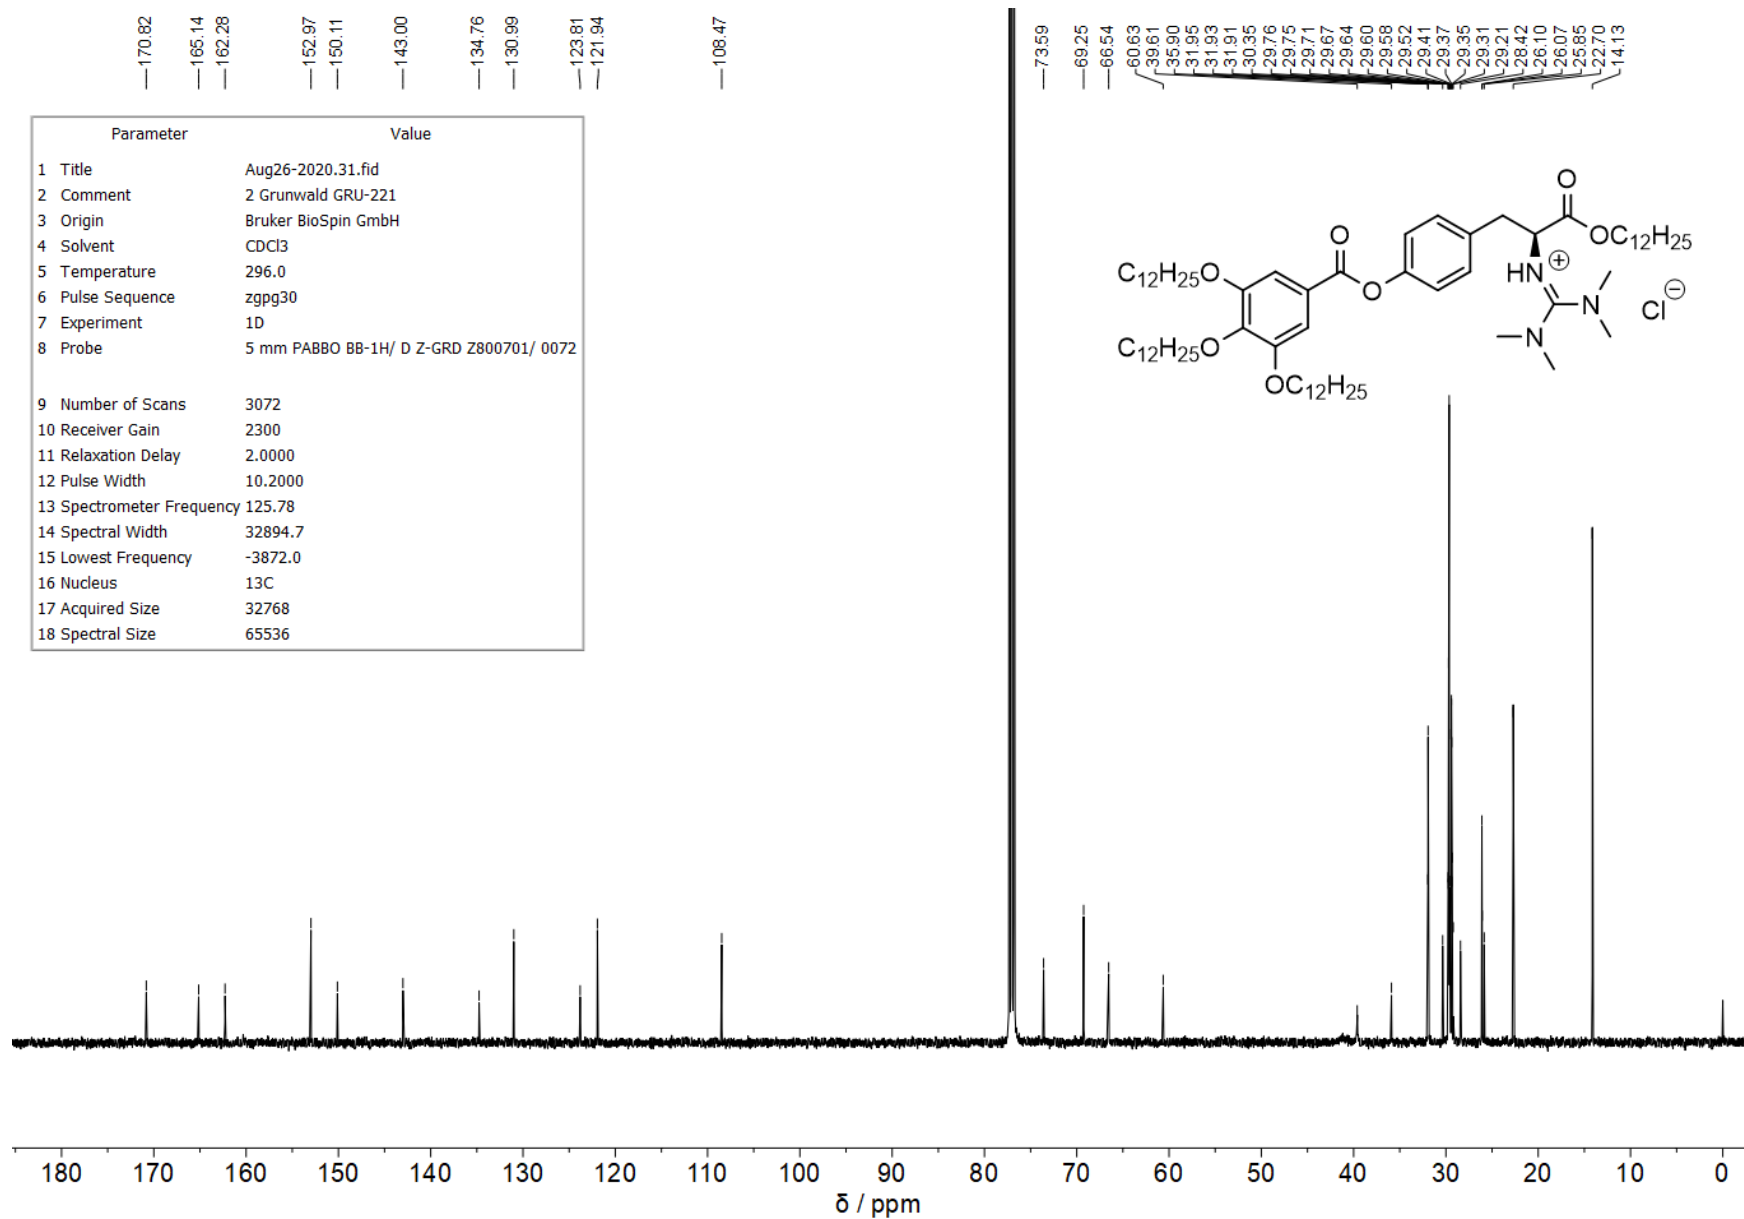

## 3,4,5-C14TyrC12Cl

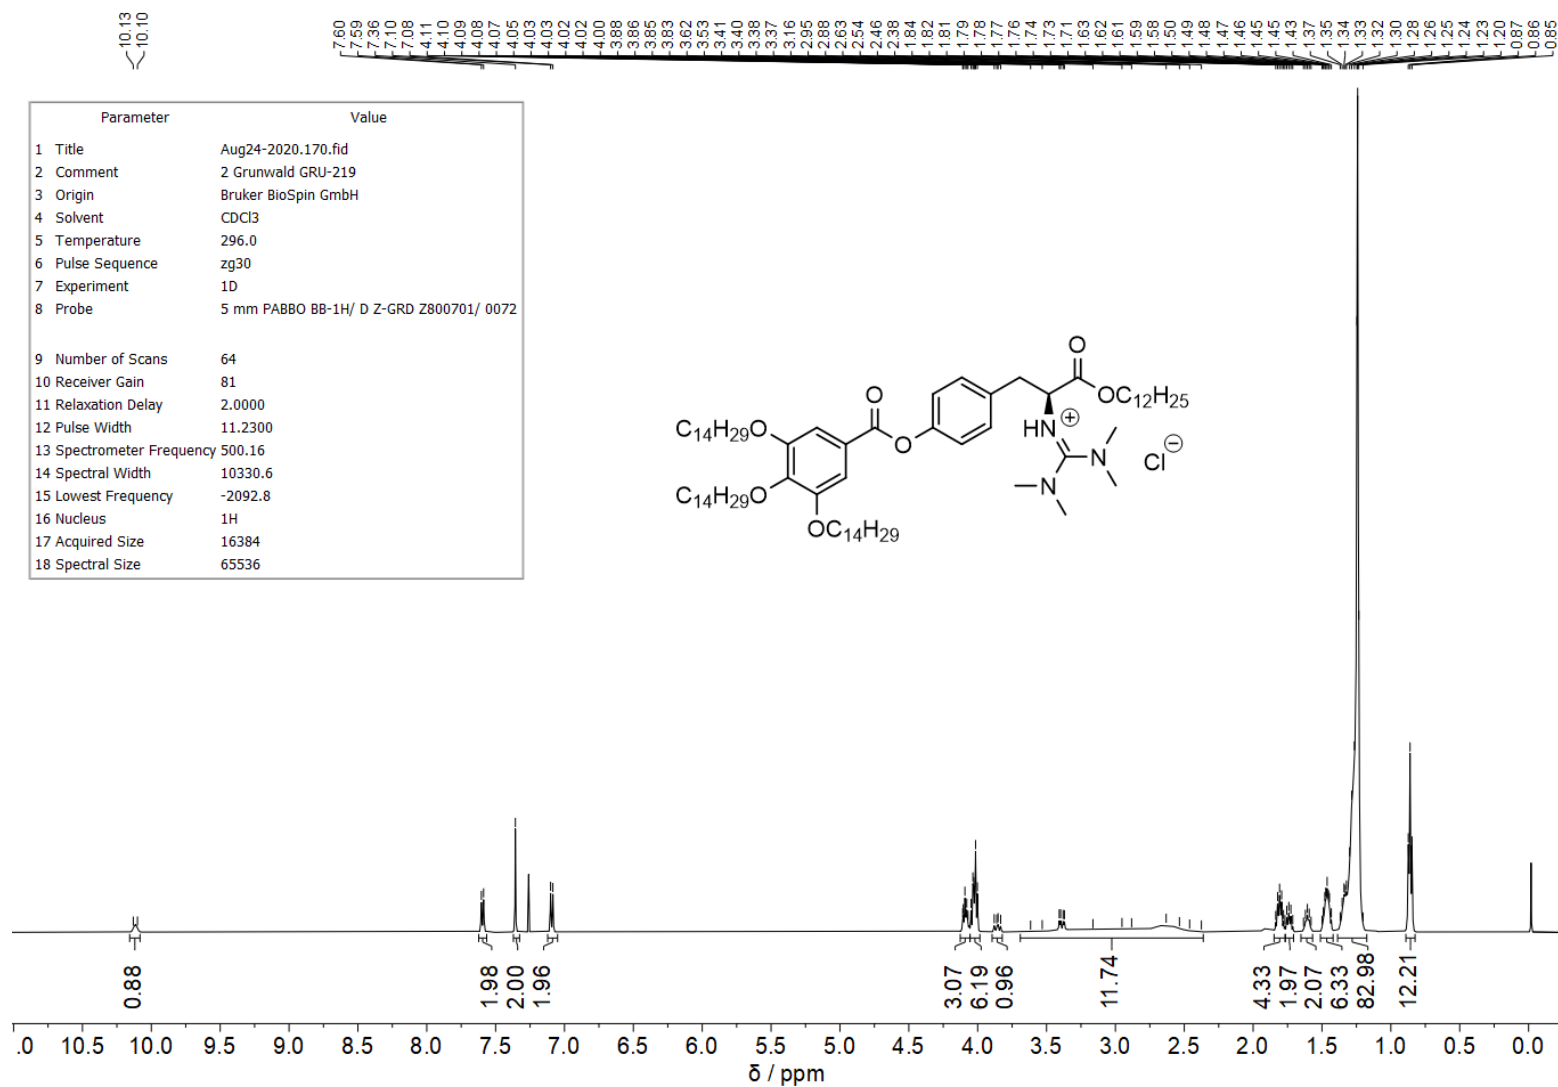

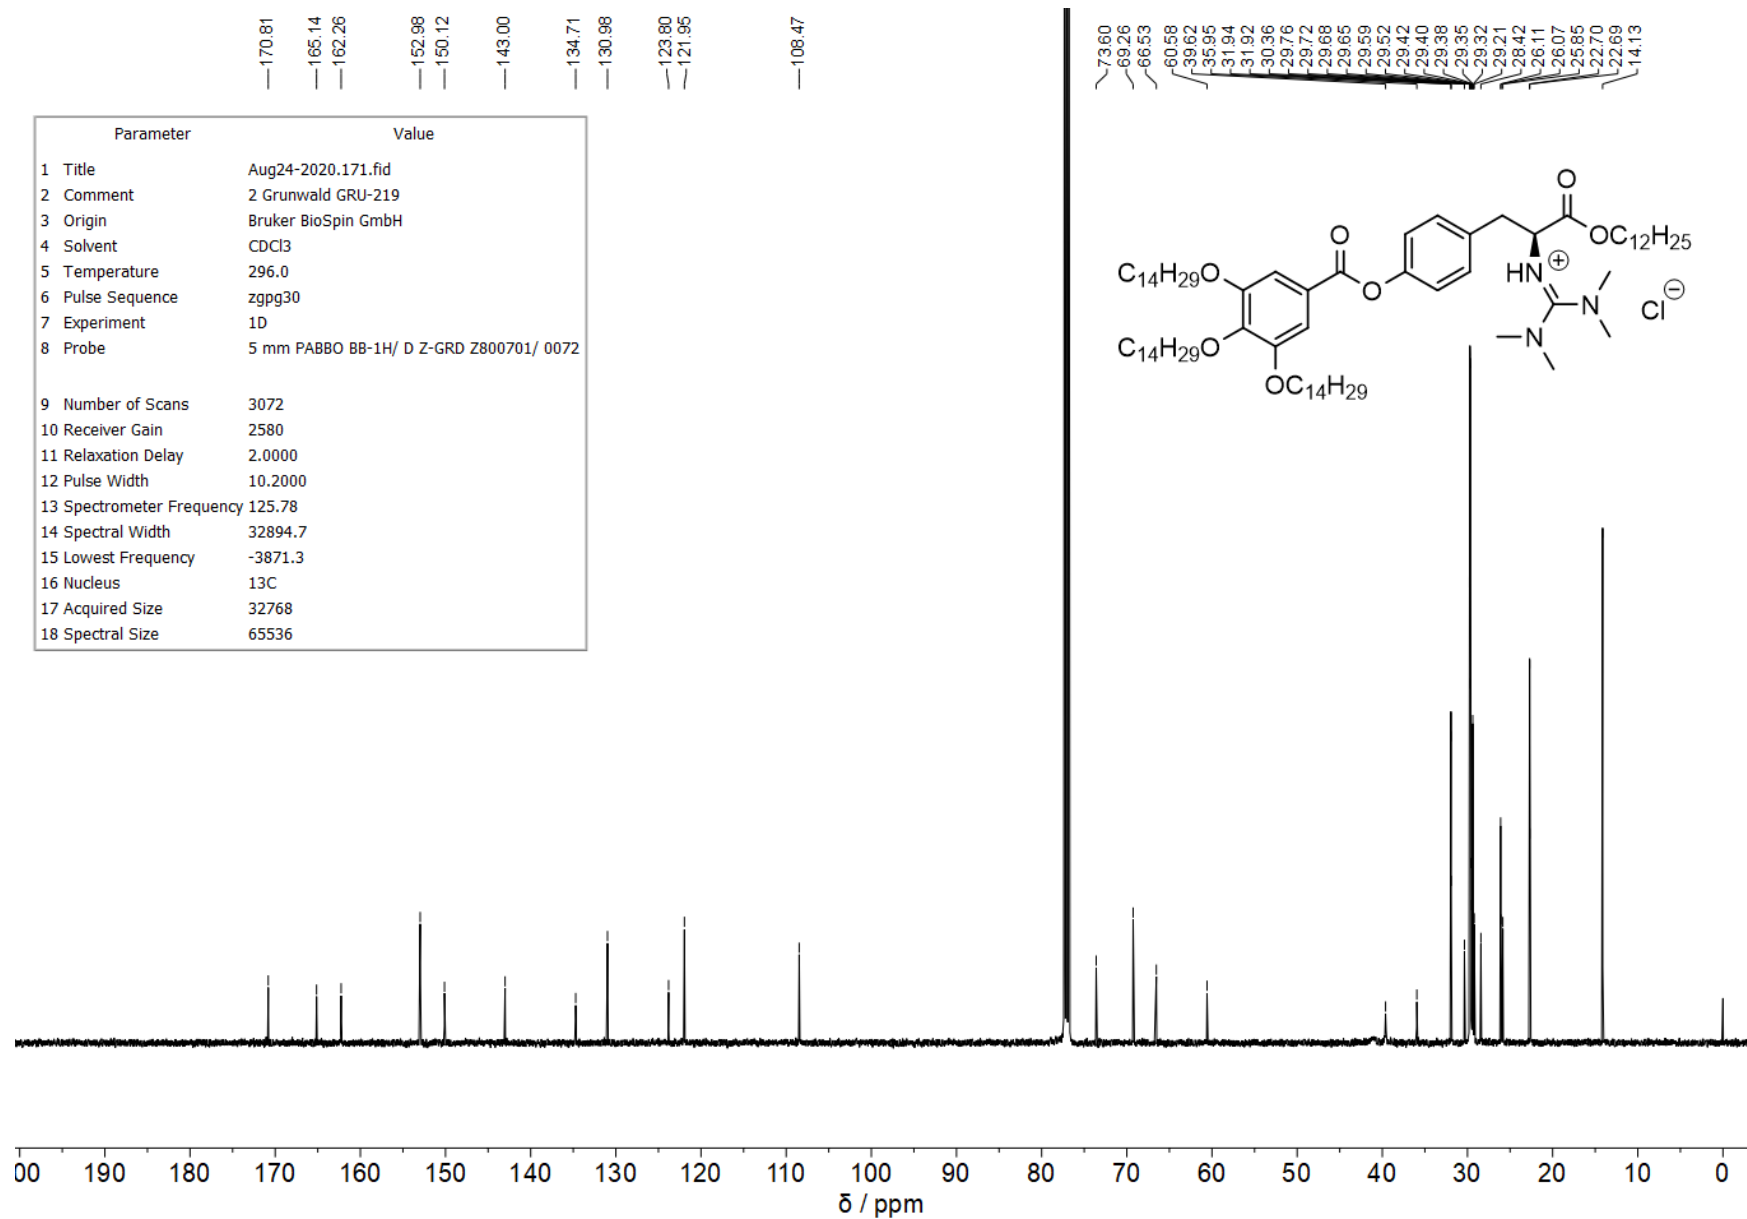

3,4,5-C<sub>10</sub>TyrC<sub>14</sub>Cl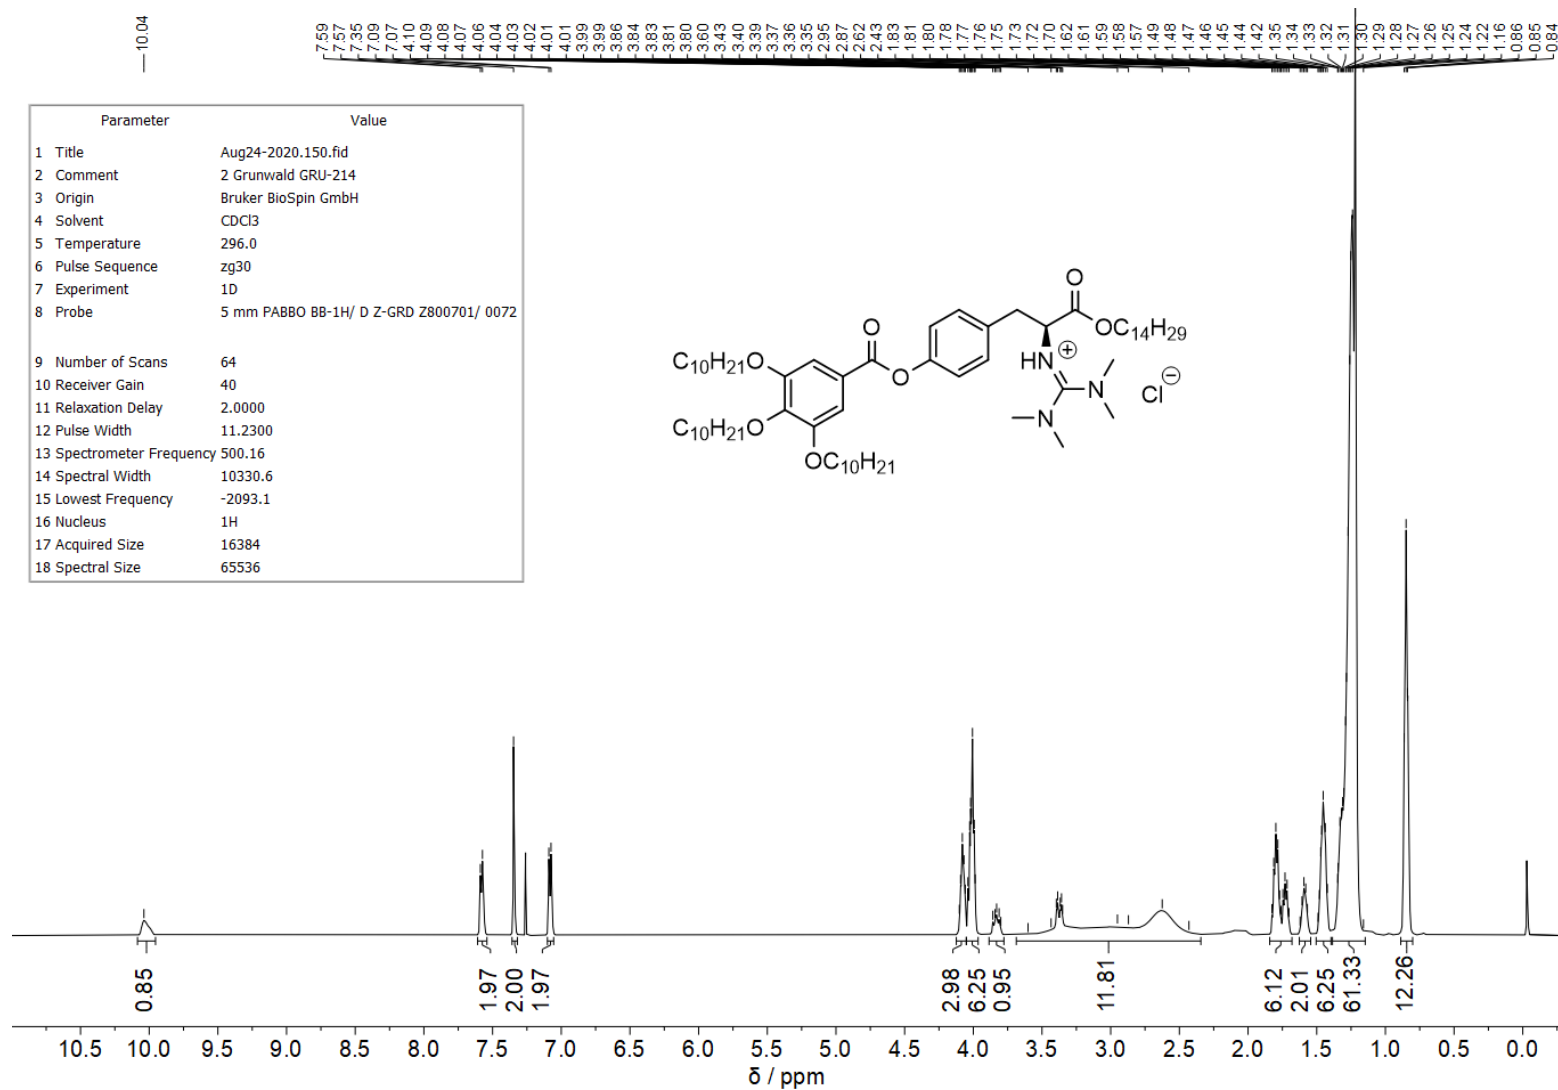

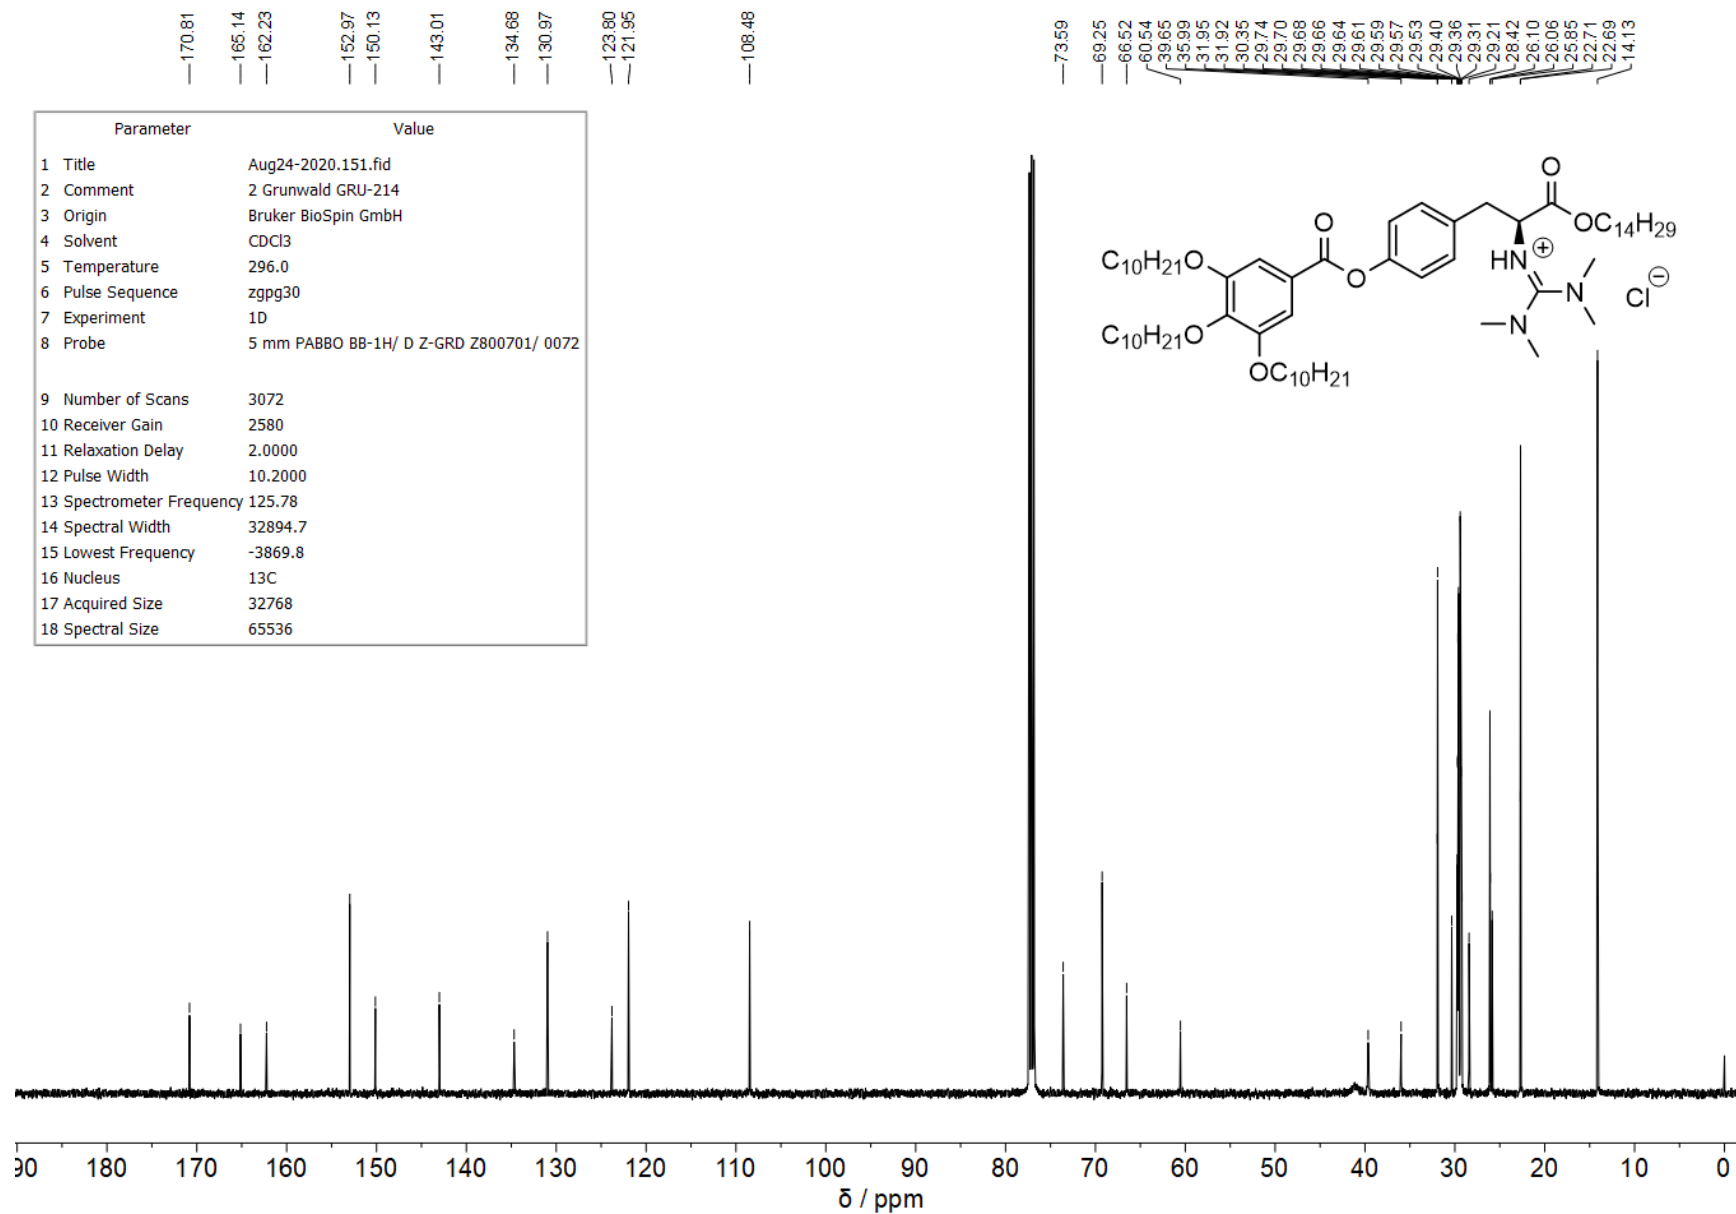

## 3,4,5-C12TyrC14Cl

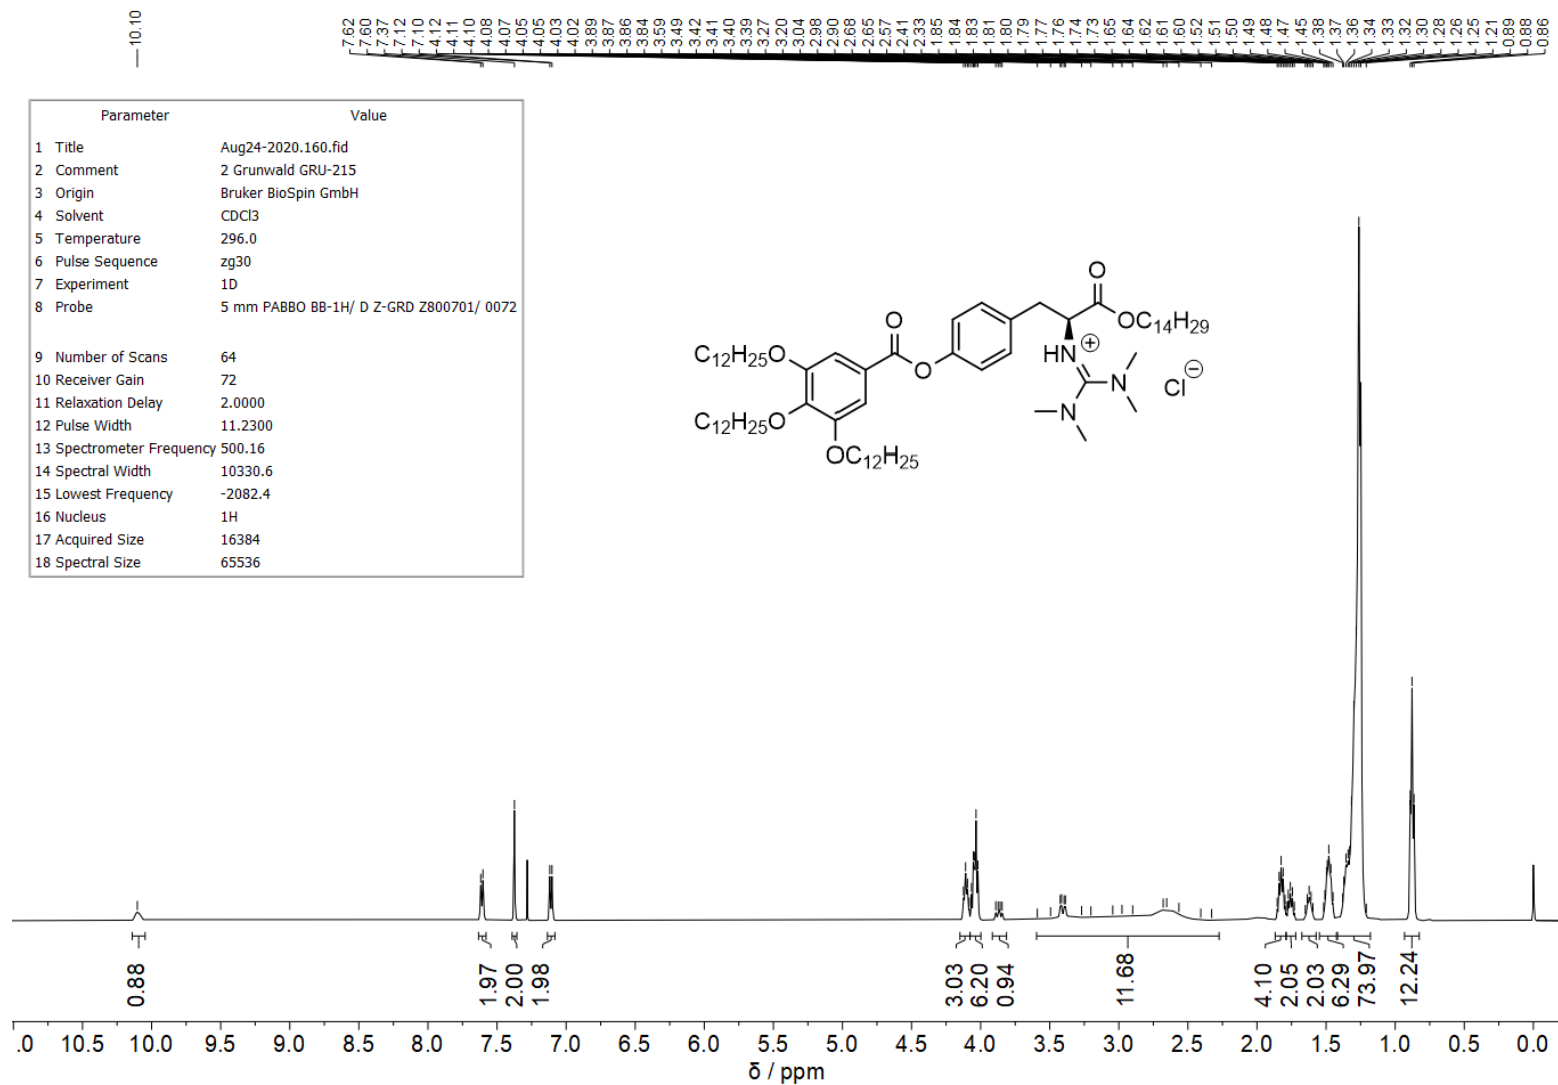



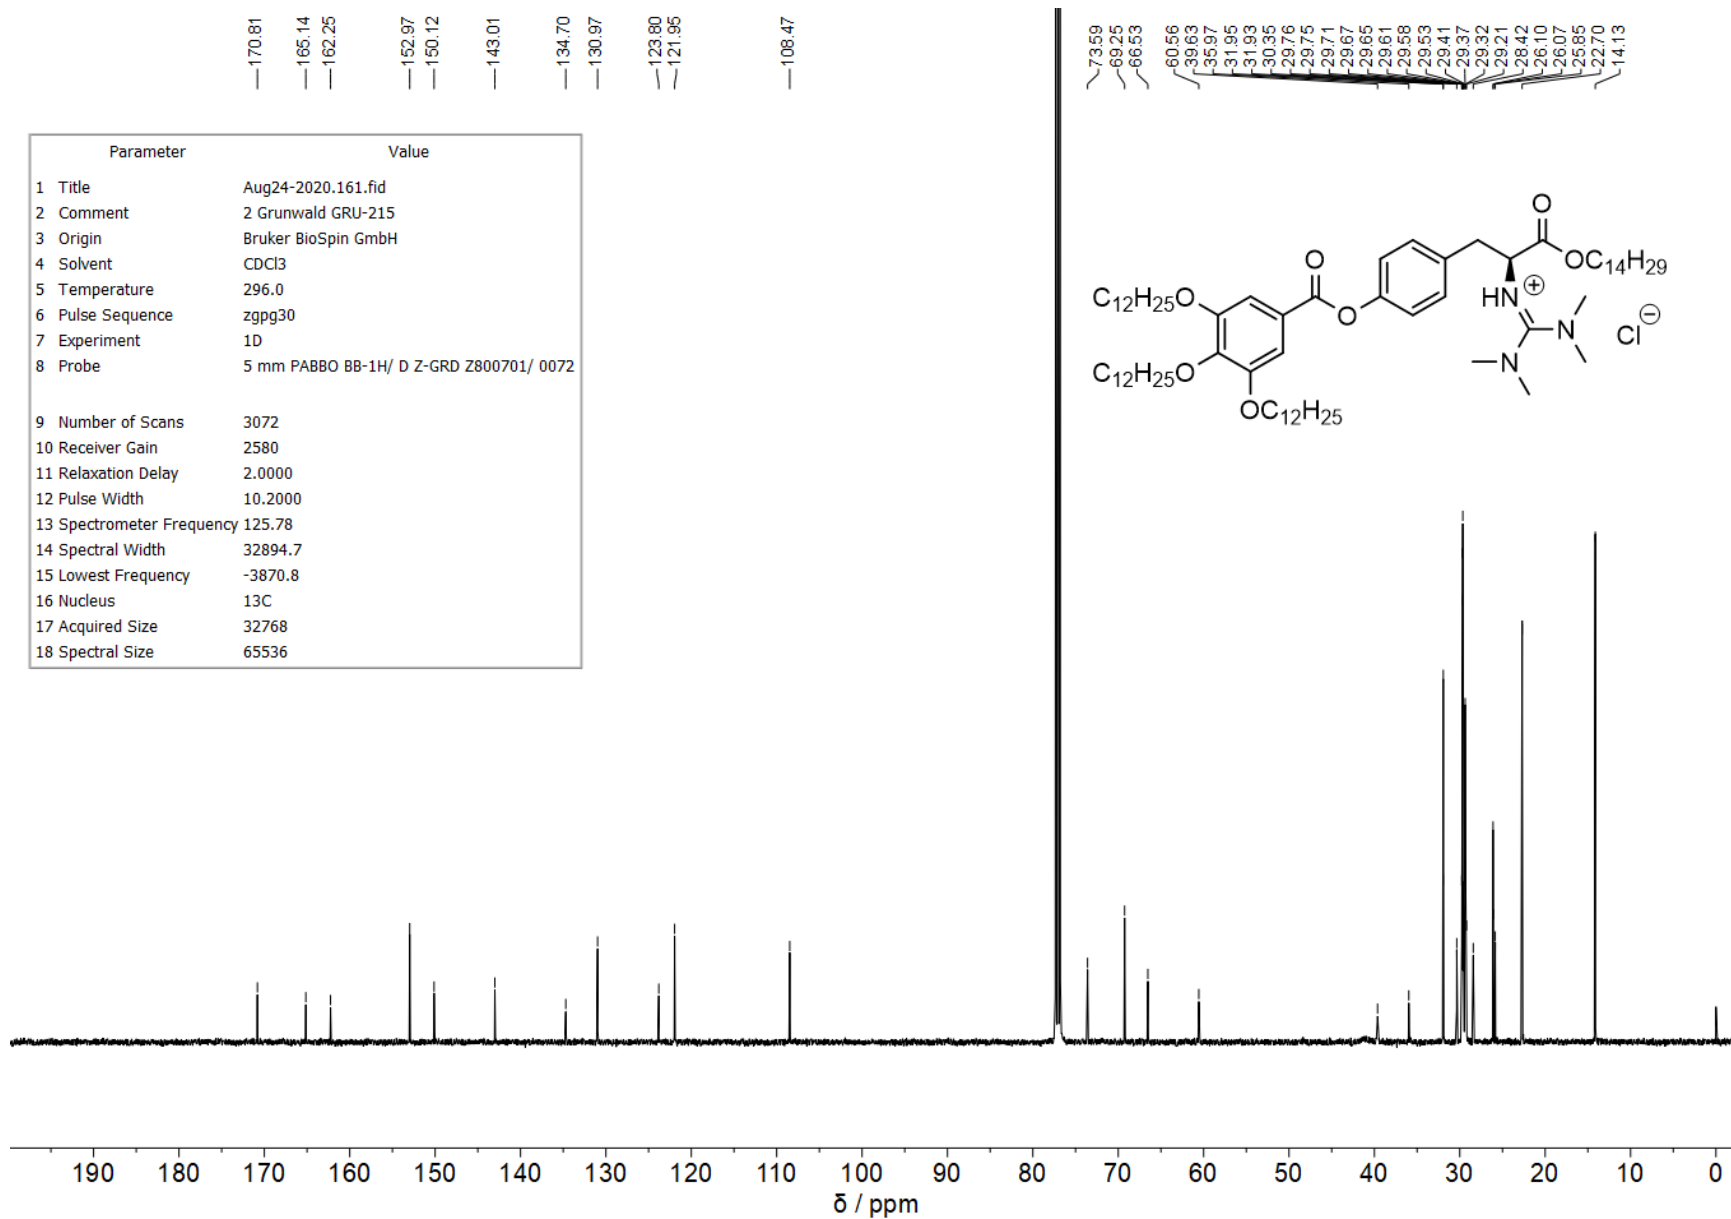

## 3,4,5-C14TyrC14Cl

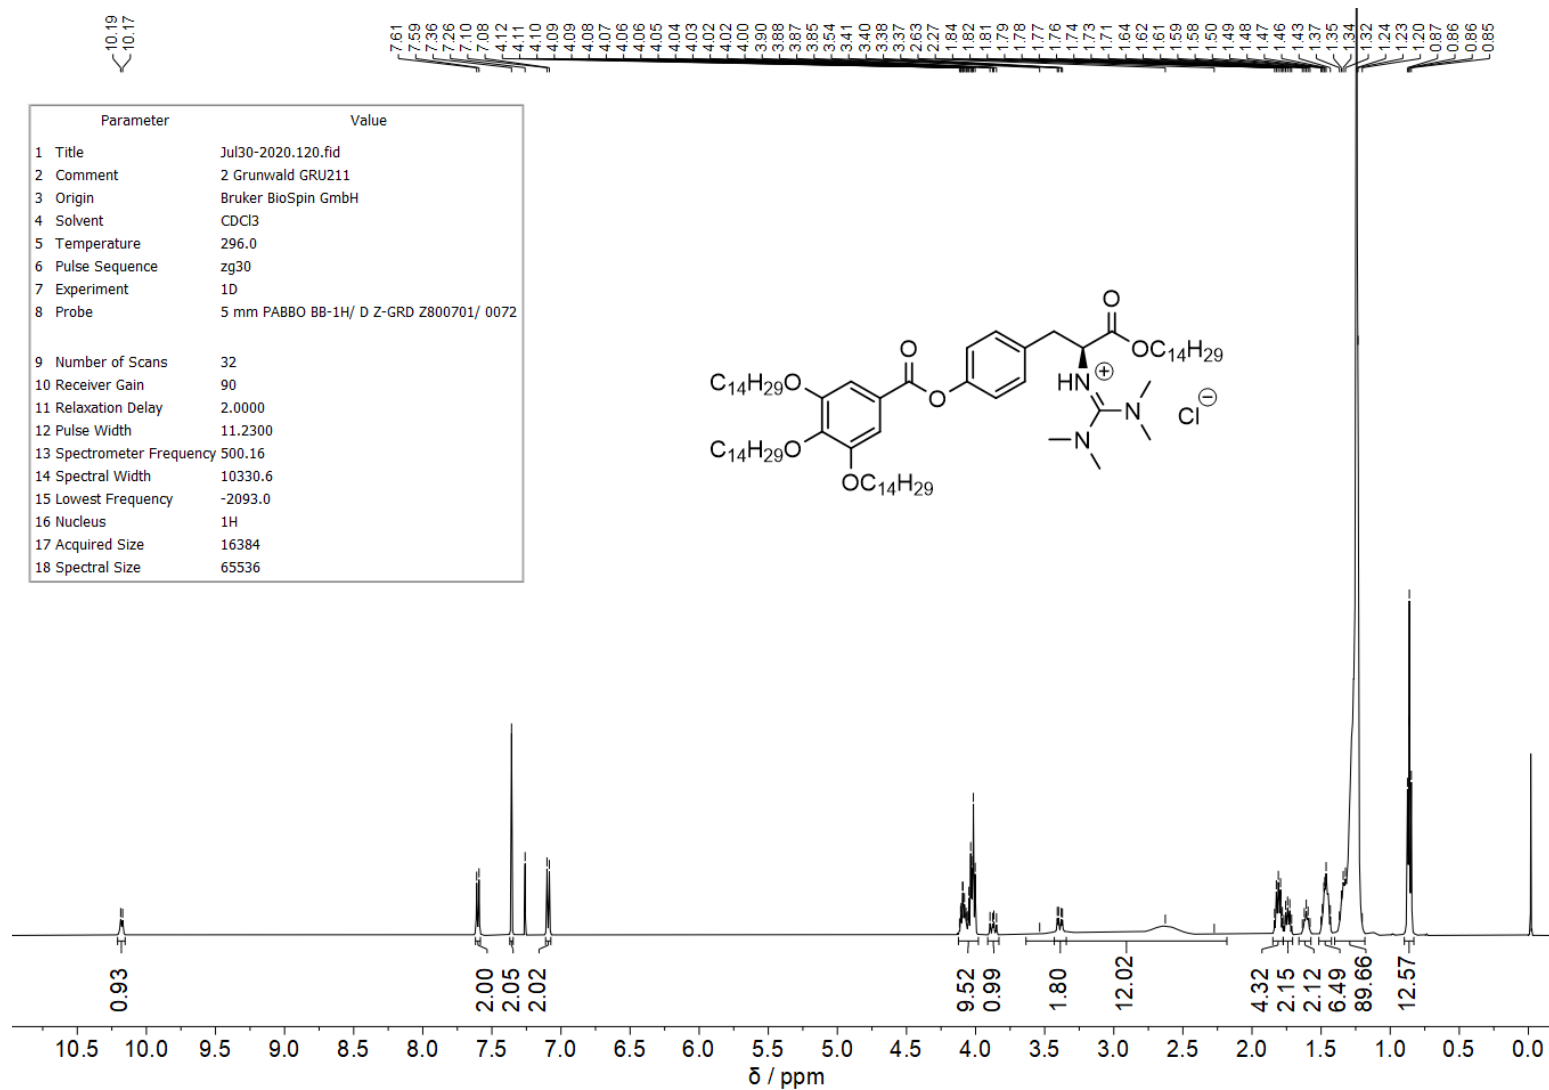

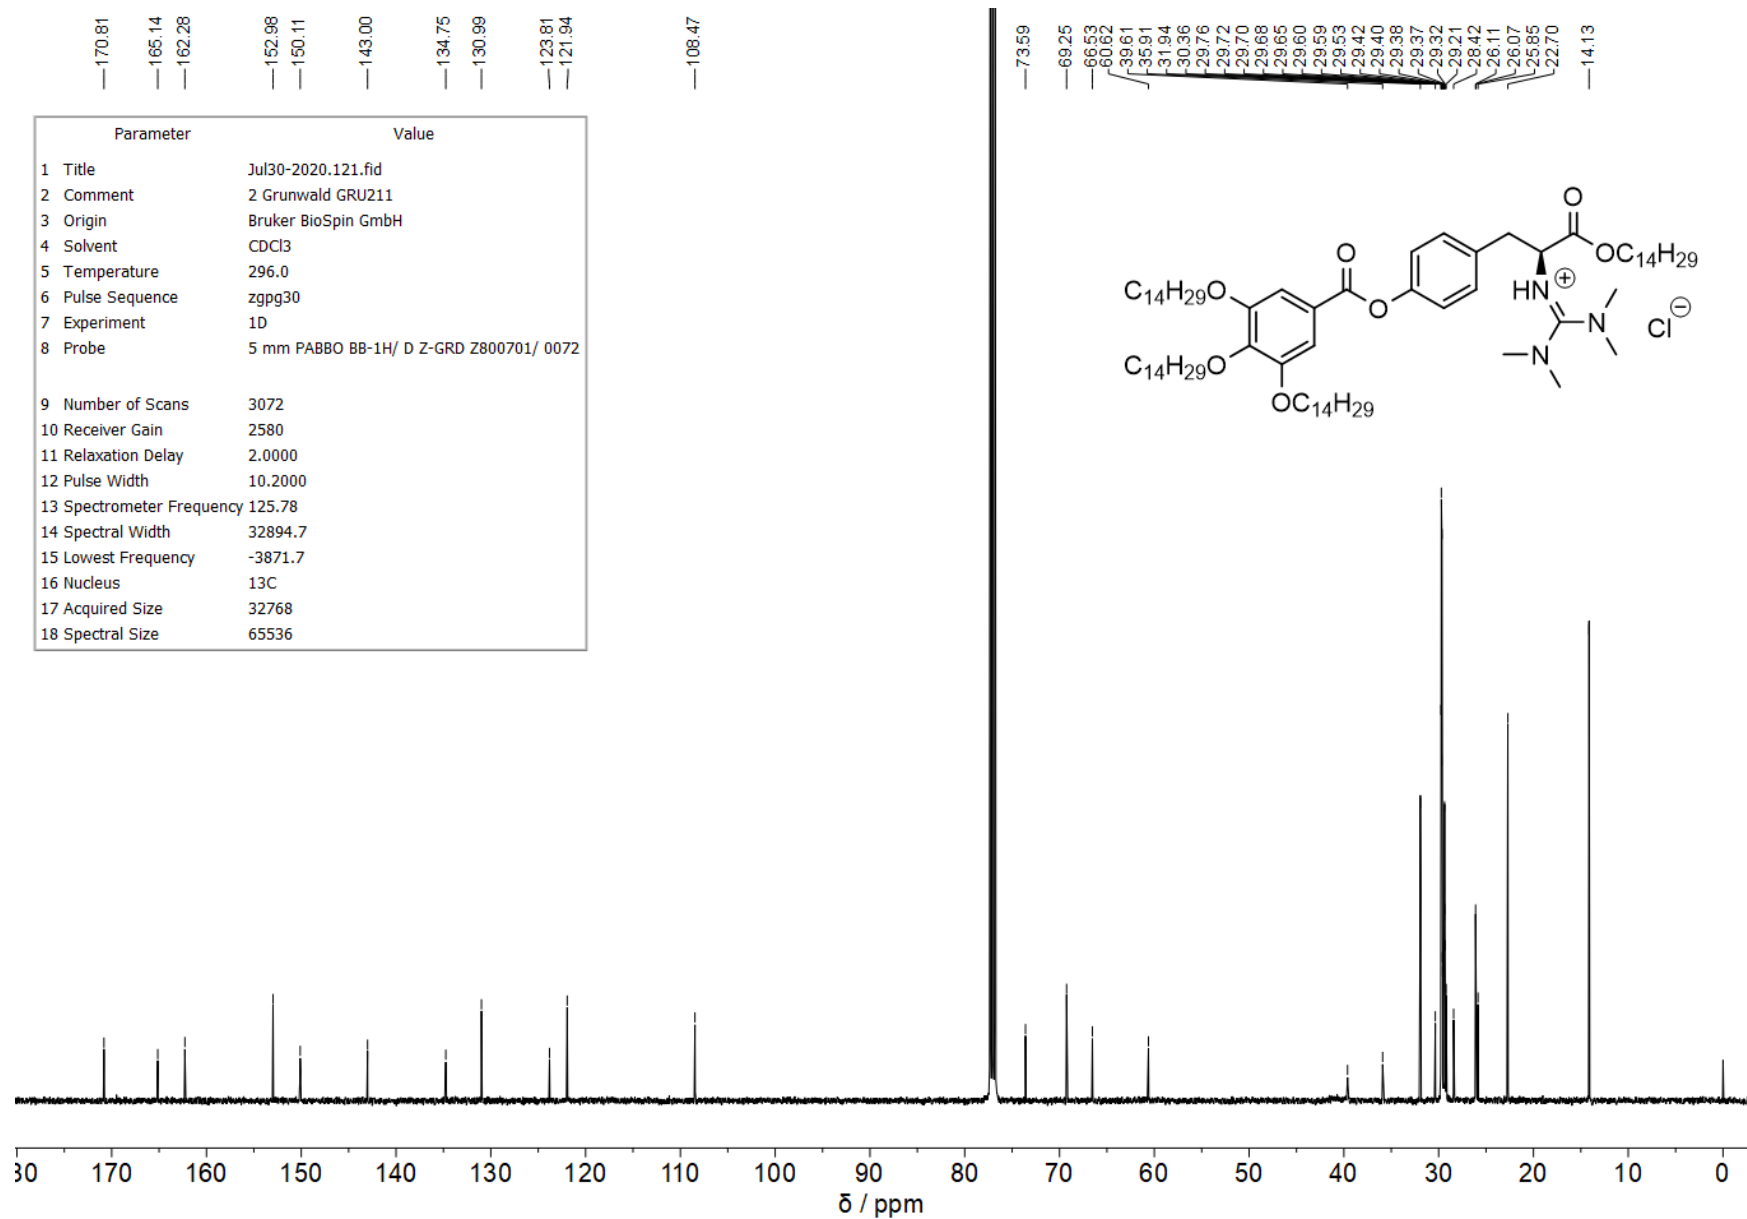

3,4,5-C<sub>14</sub>TyrC<sub>14</sub>OTf

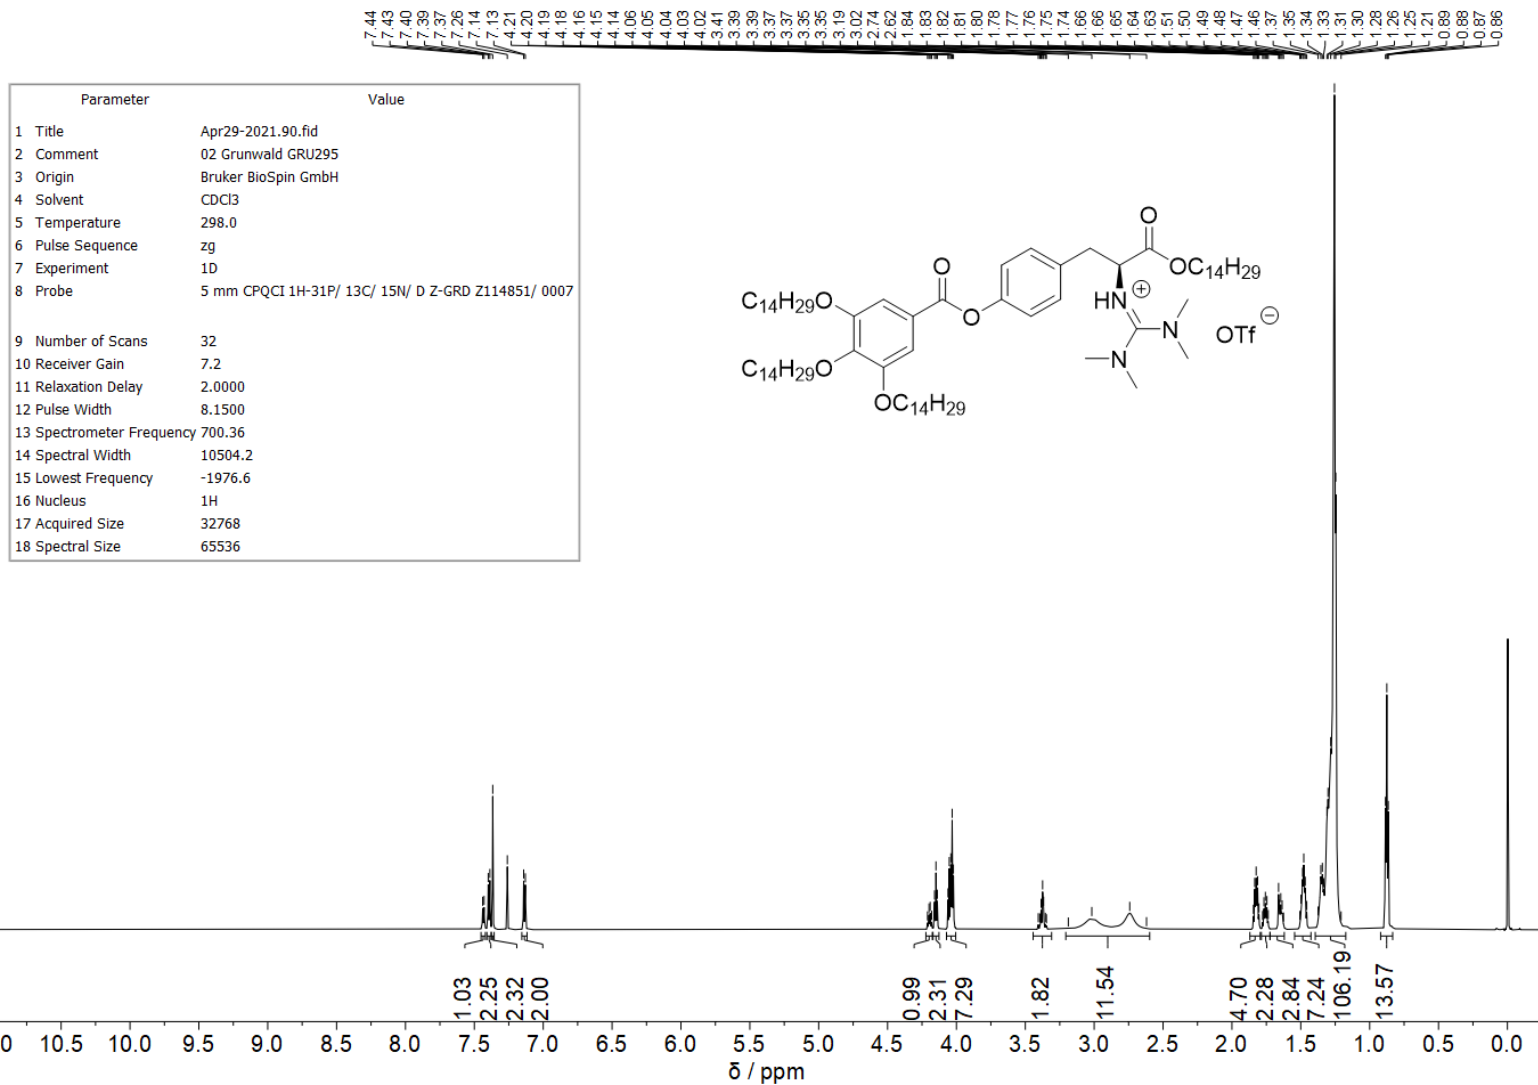

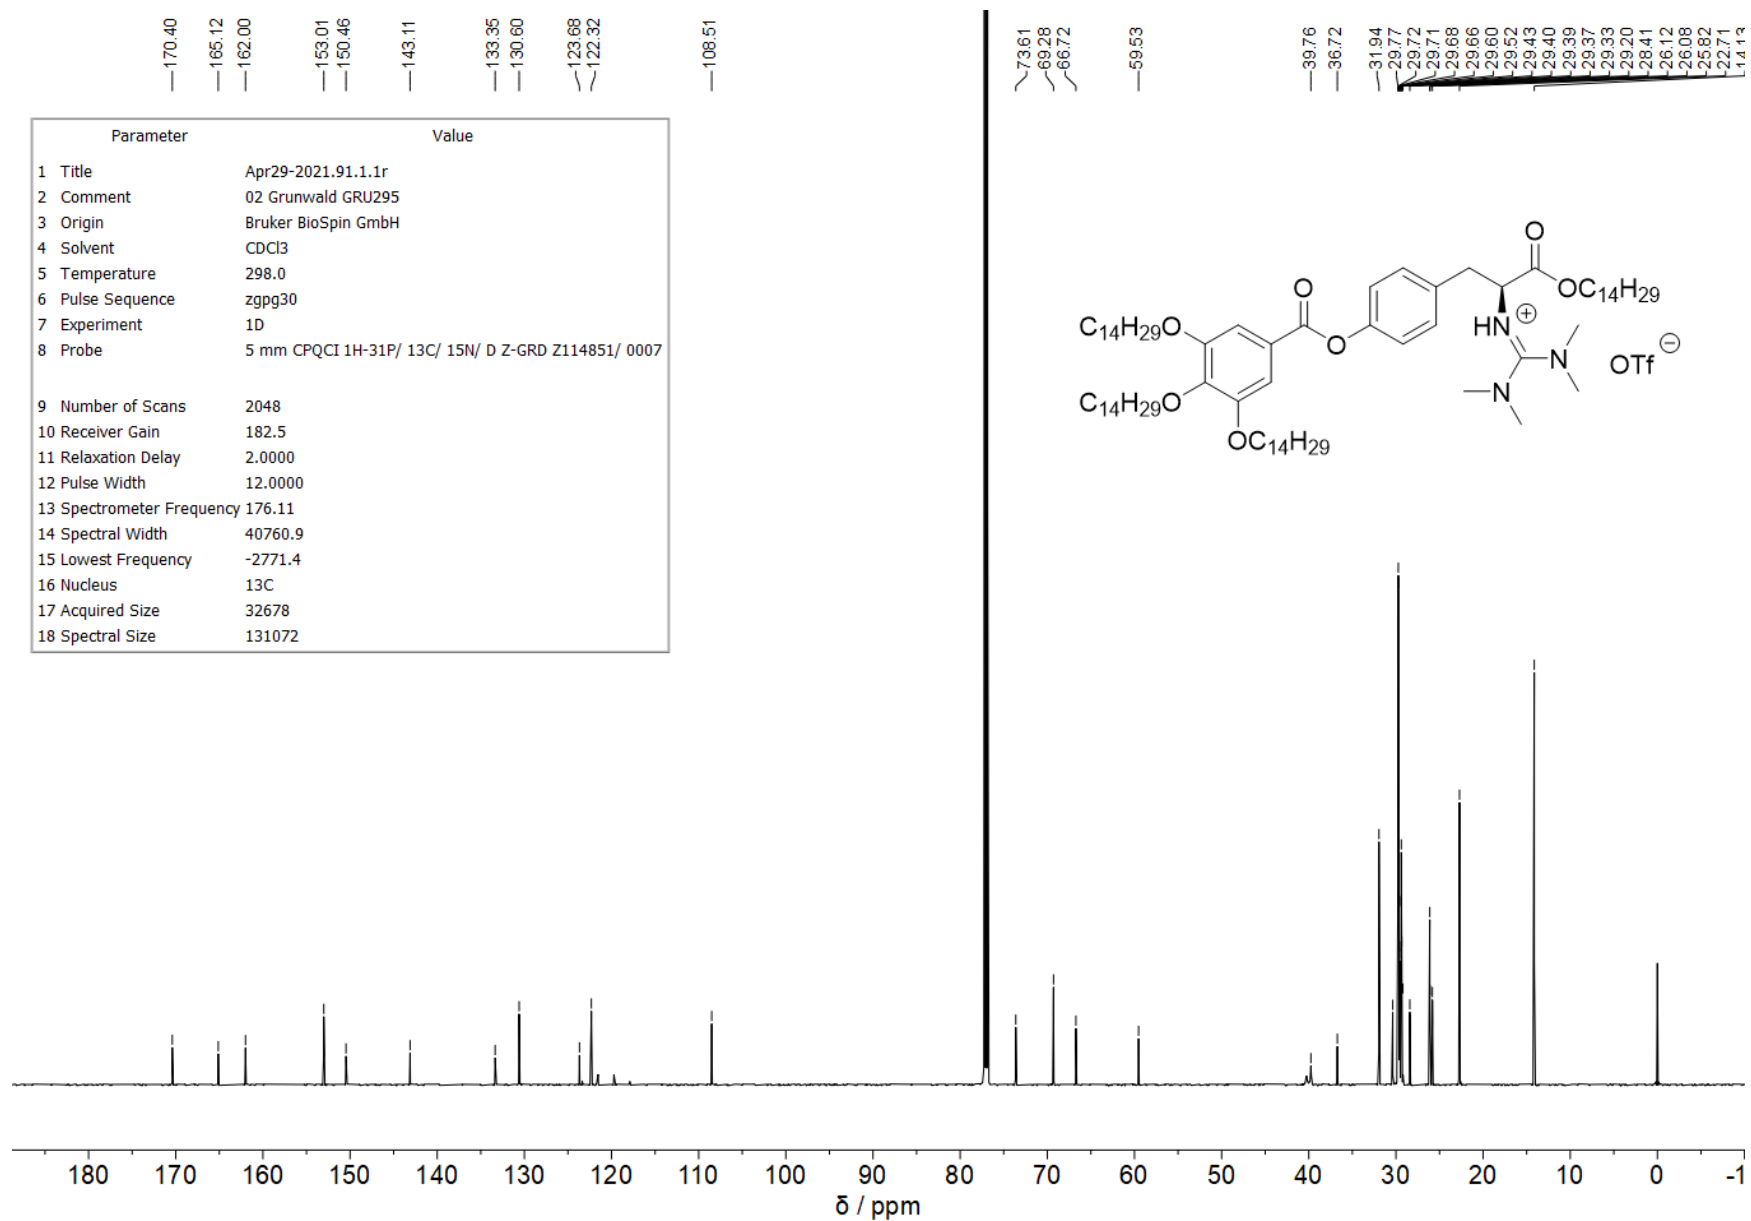

| Parameter                 | Value                                        |
|---------------------------|----------------------------------------------|
| 1 Title                   | May10-2021.212.fid                           |
| 2 Comment                 | 02 Grunwald GRU-295                          |
| 3 Origin                  | Bruker BioSpin GmbH                          |
| 4 Solvent                 | CDCl3                                        |
| 5 Temperature             | 298.0                                        |
| 6 Pulse Sequence          | zgfgqn                                       |
| 7 Experiment              | 1D                                           |
| 8 Probe                   | 5 mm PABBO BB/ 19F-1H/ D Z-GRD Z108618/ 0806 |
| 9 Number of Scans         | 32                                           |
| 10 Receiver Gain          | 205.3                                        |
| 11 Relaxation Delay       | 1.0000                                       |
| 12 Pulse Width            | 14.6500                                      |
| 13 Spectrometer Frequency | 376.43                                       |
| 14 Spectral Width         | 89285.7                                      |
| 15 Lowest Frequency       | -82289.9                                     |
| 16 Nucleus                | 19F                                          |
| 17 Acquired Size          | 65536                                        |
| 18 Spectral Size          | 131072                                       |

-78.33

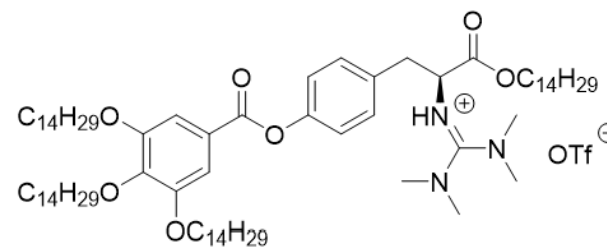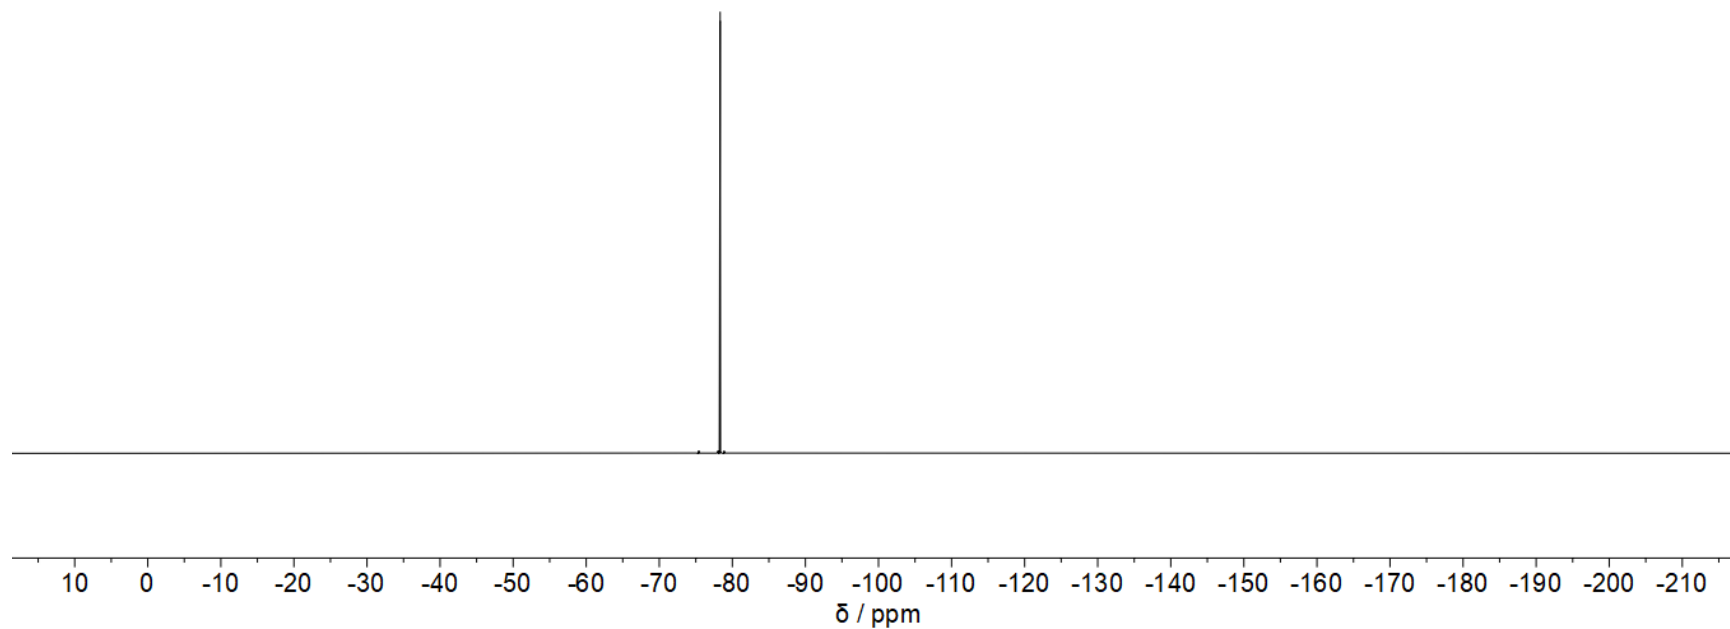

3,4,5-C<sub>14</sub>TyrC<sub>14</sub>Br

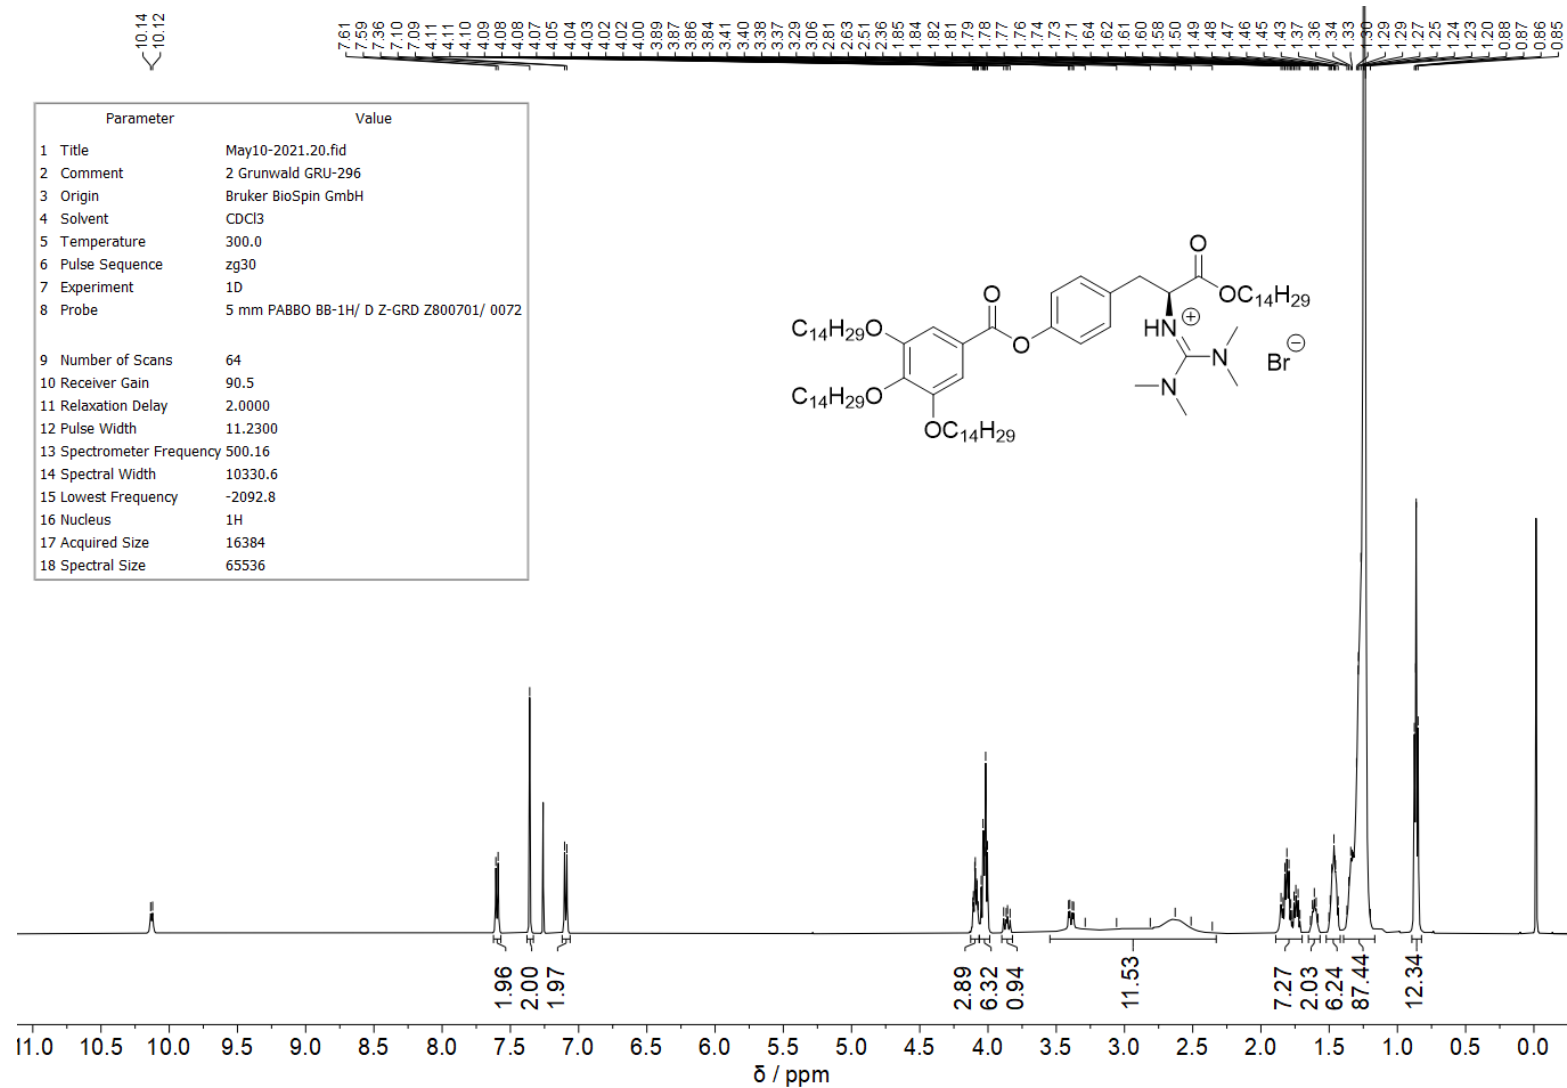

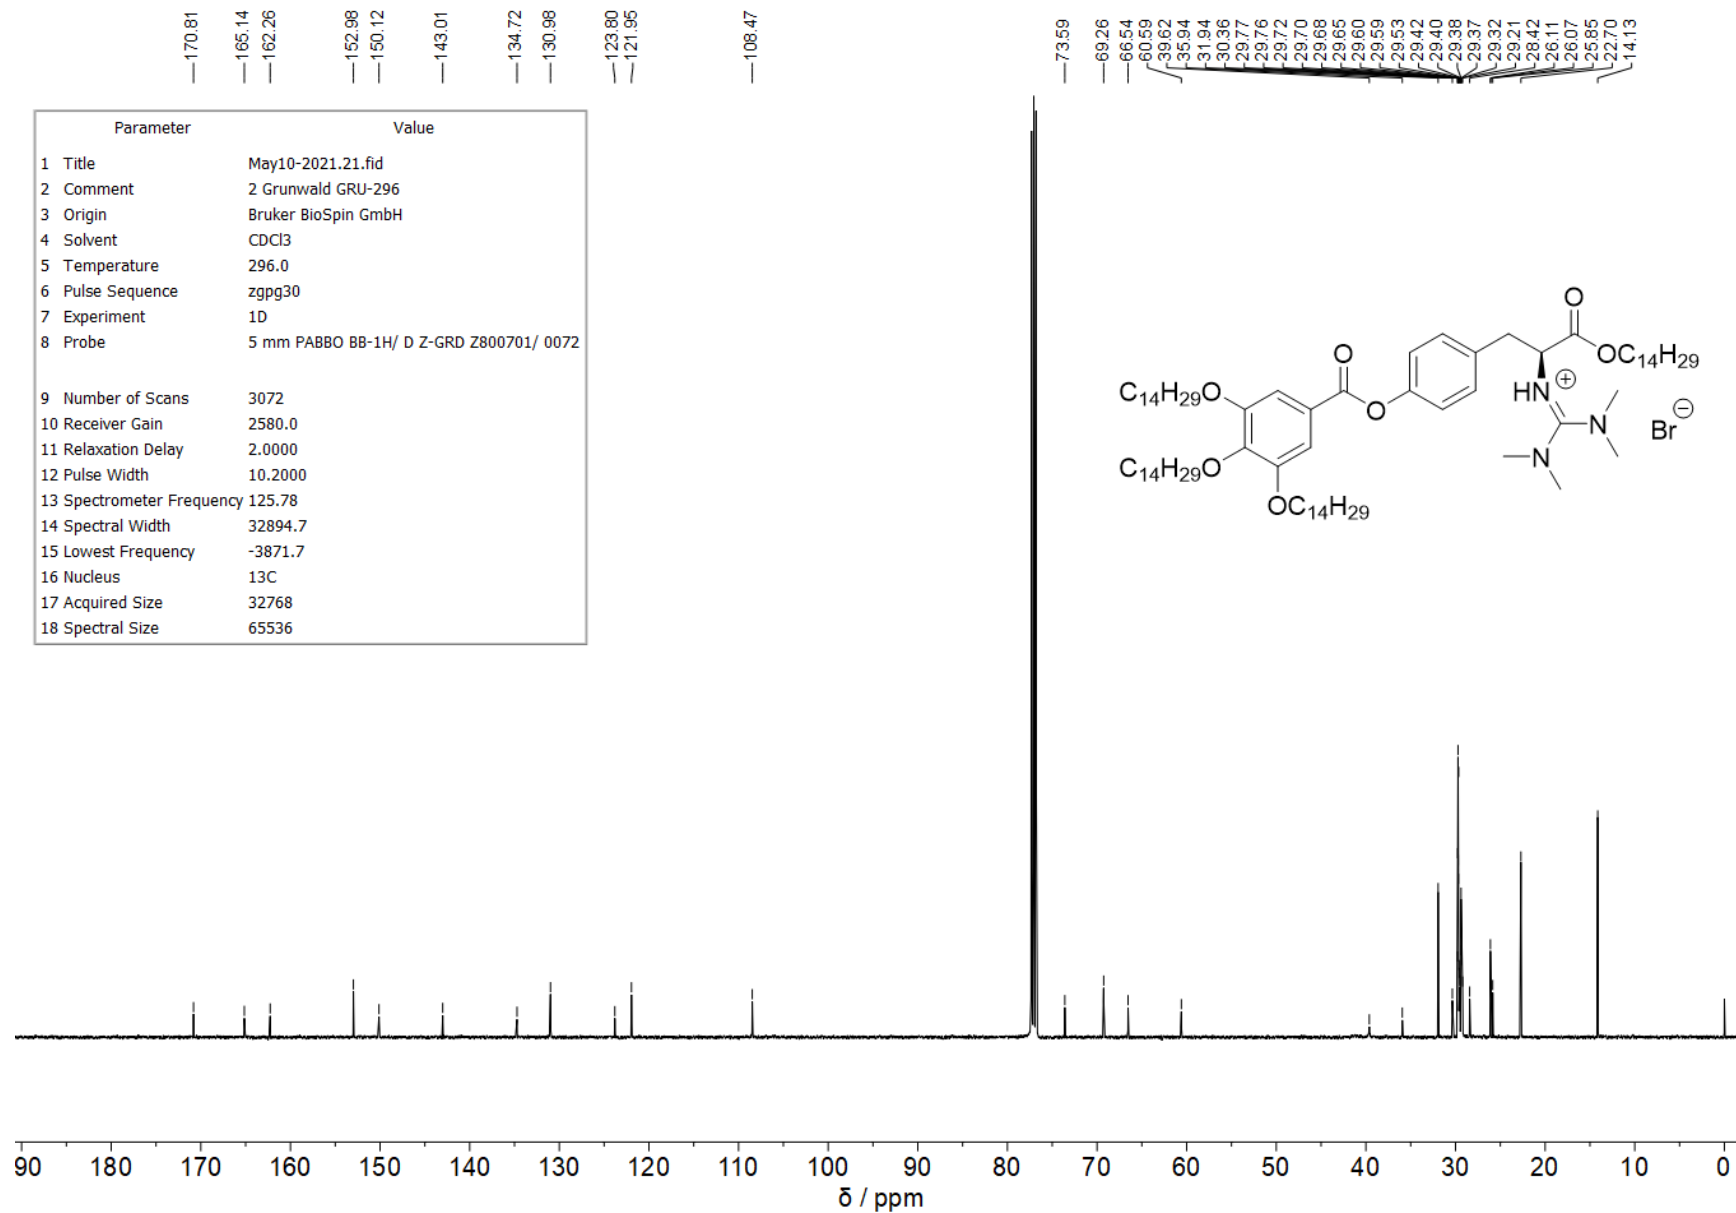



## 3,4,5-C14TyrC14I

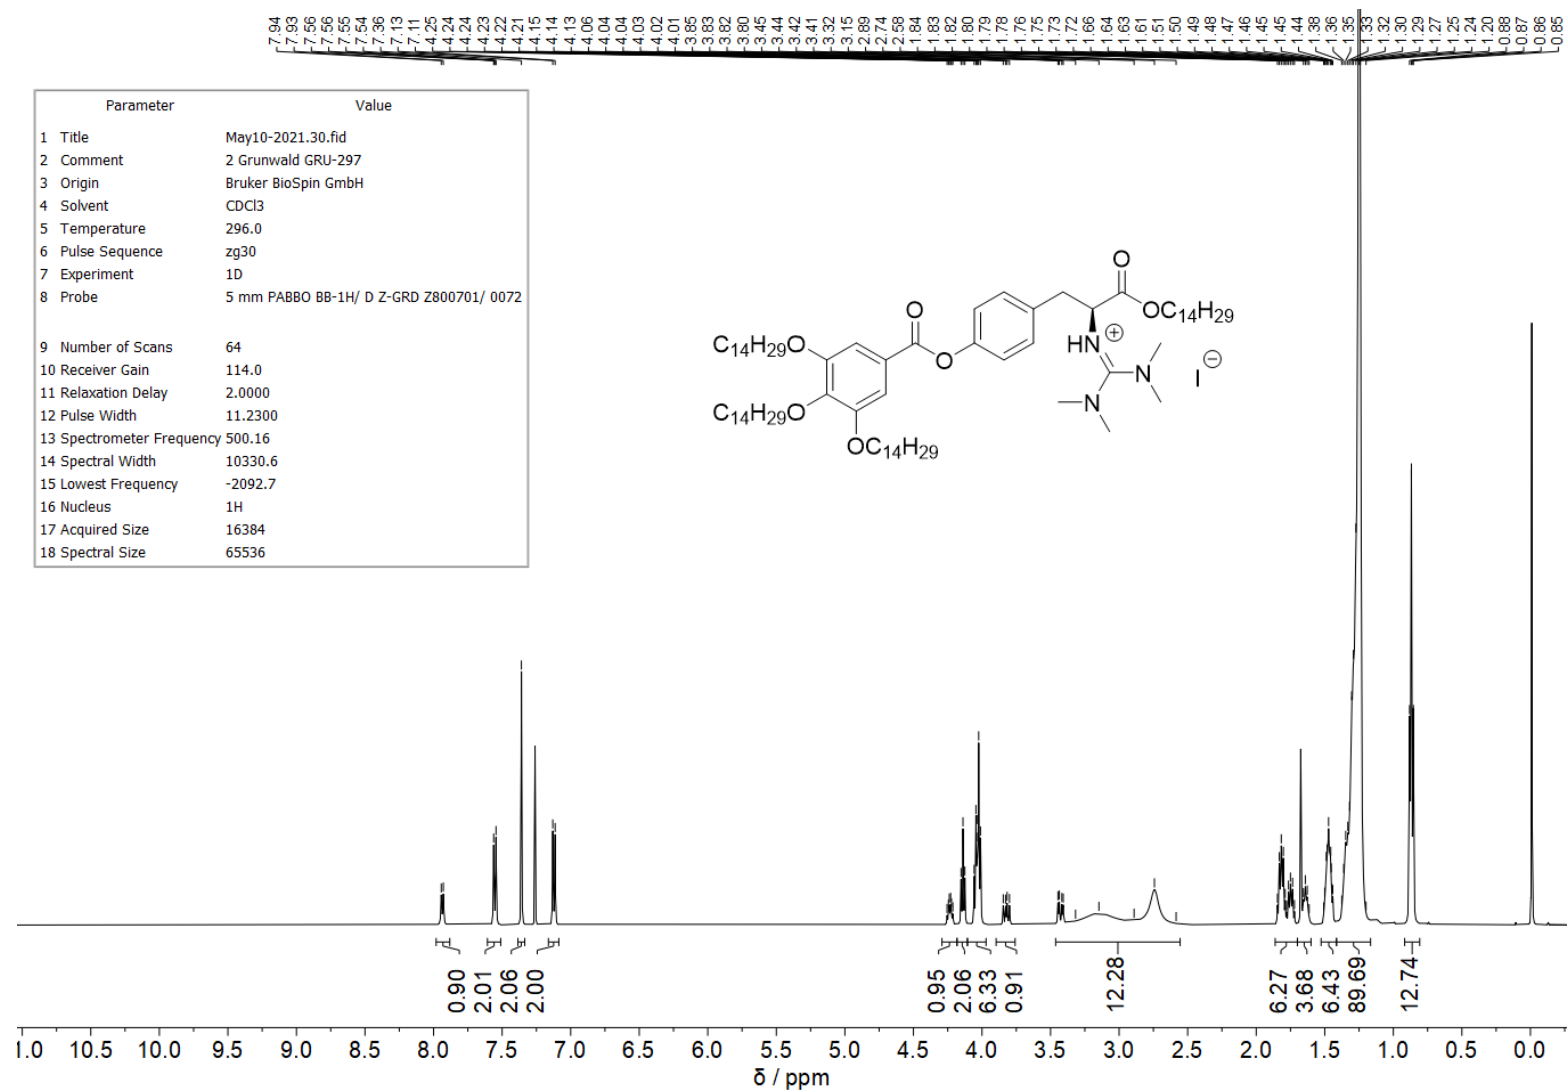

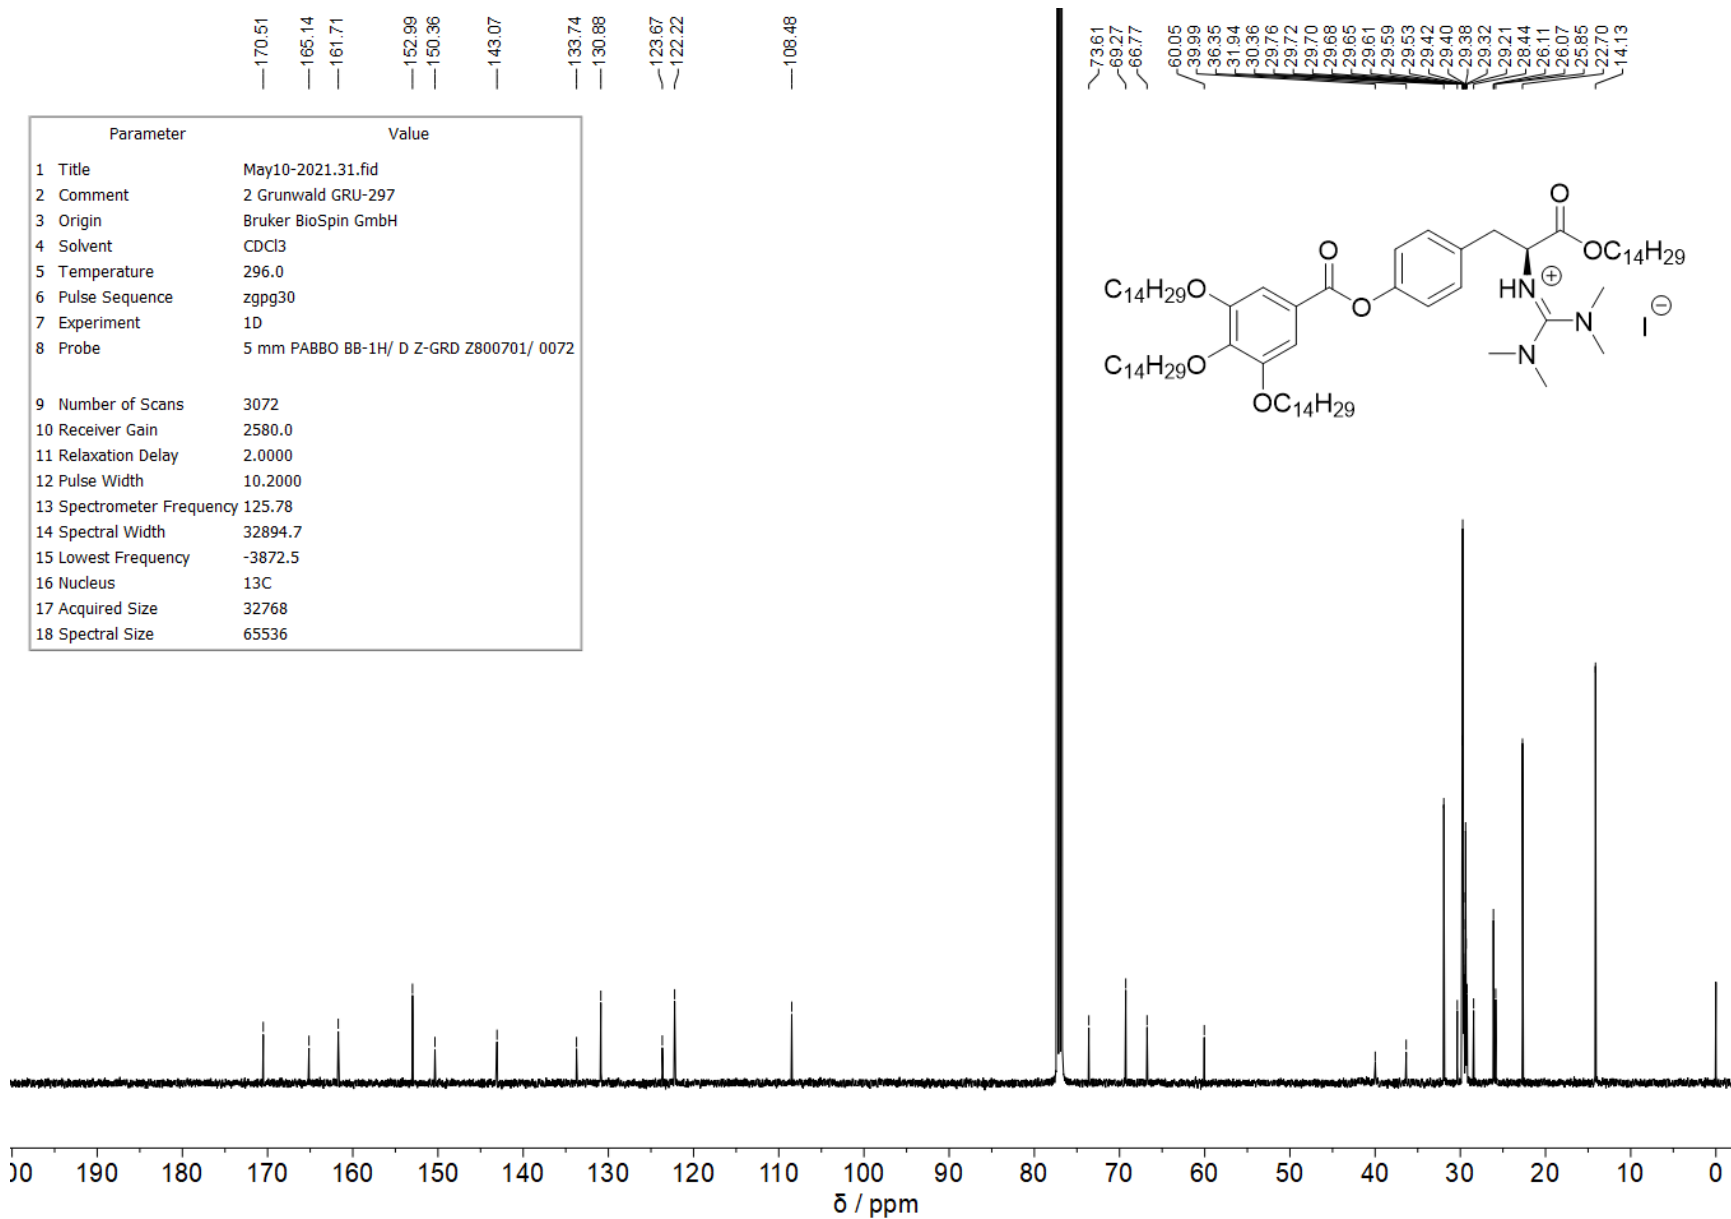

3,4,5-C<sub>14</sub>TyrC<sub>14</sub>PF<sub>6</sub>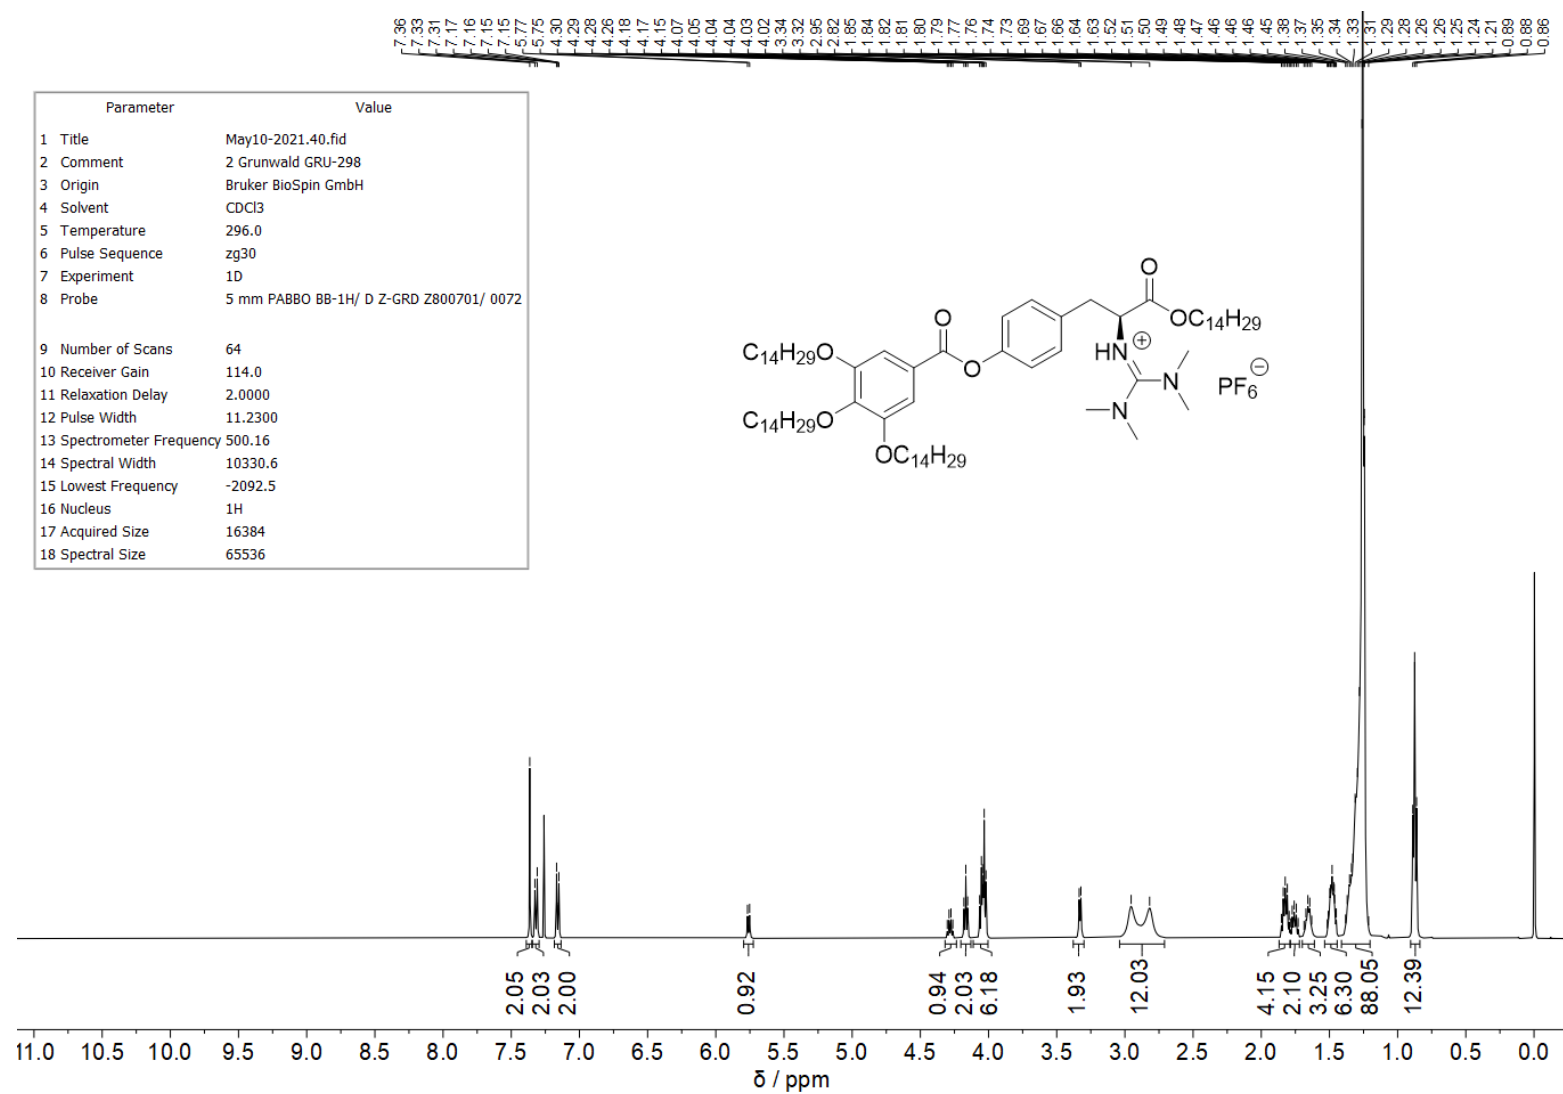

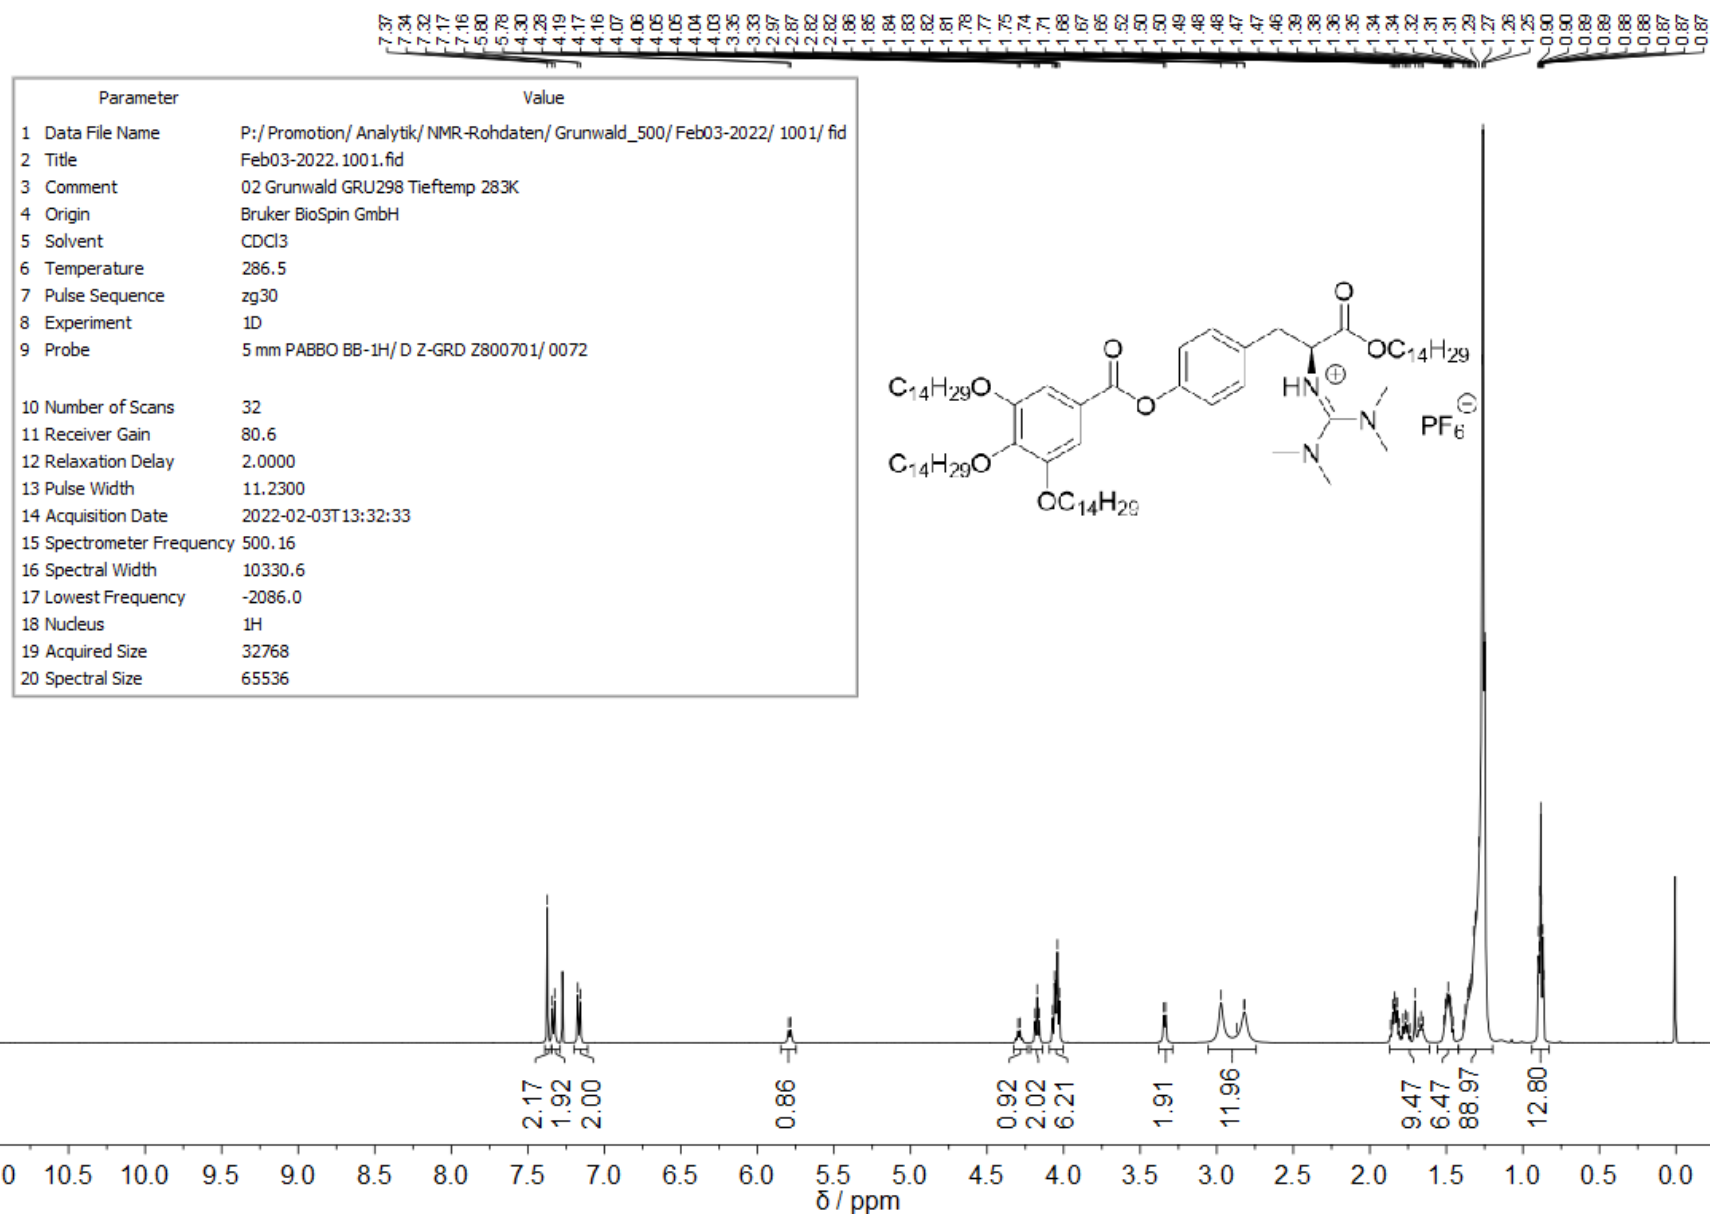

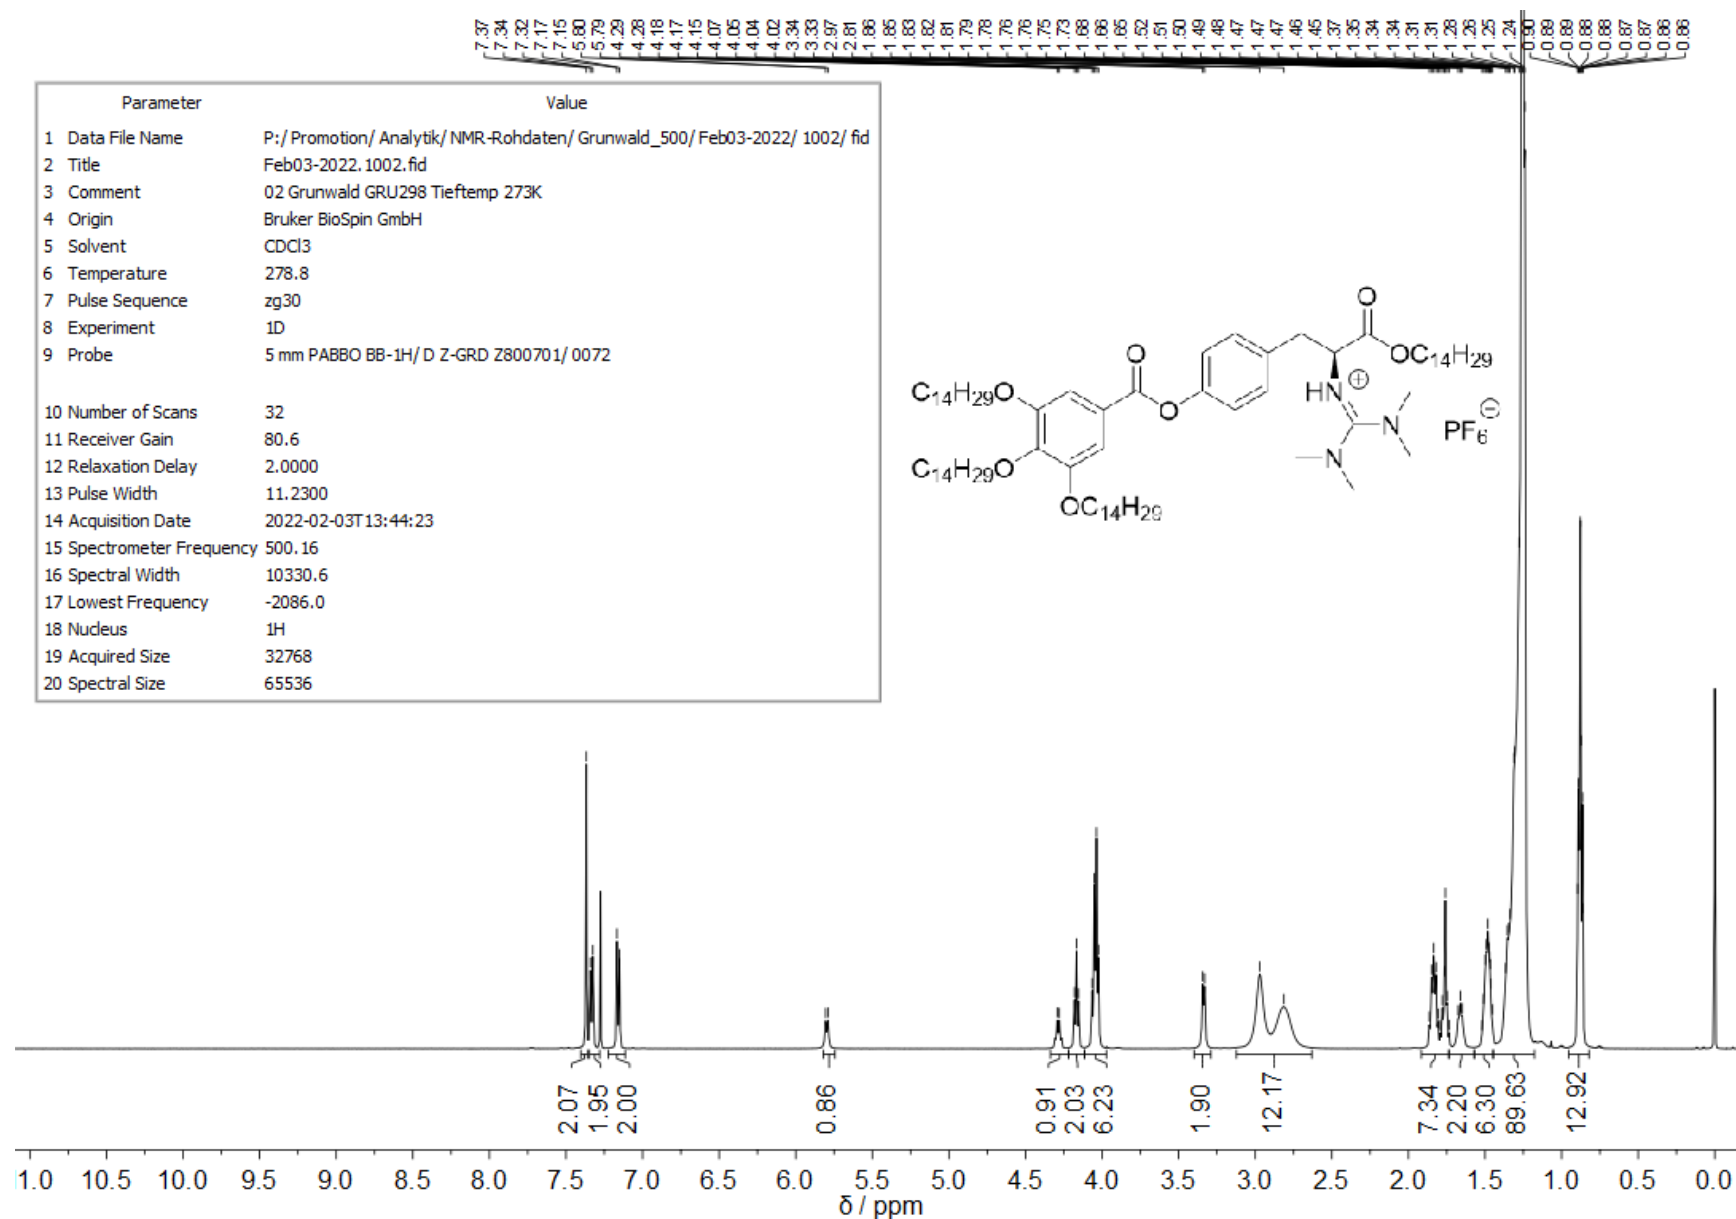

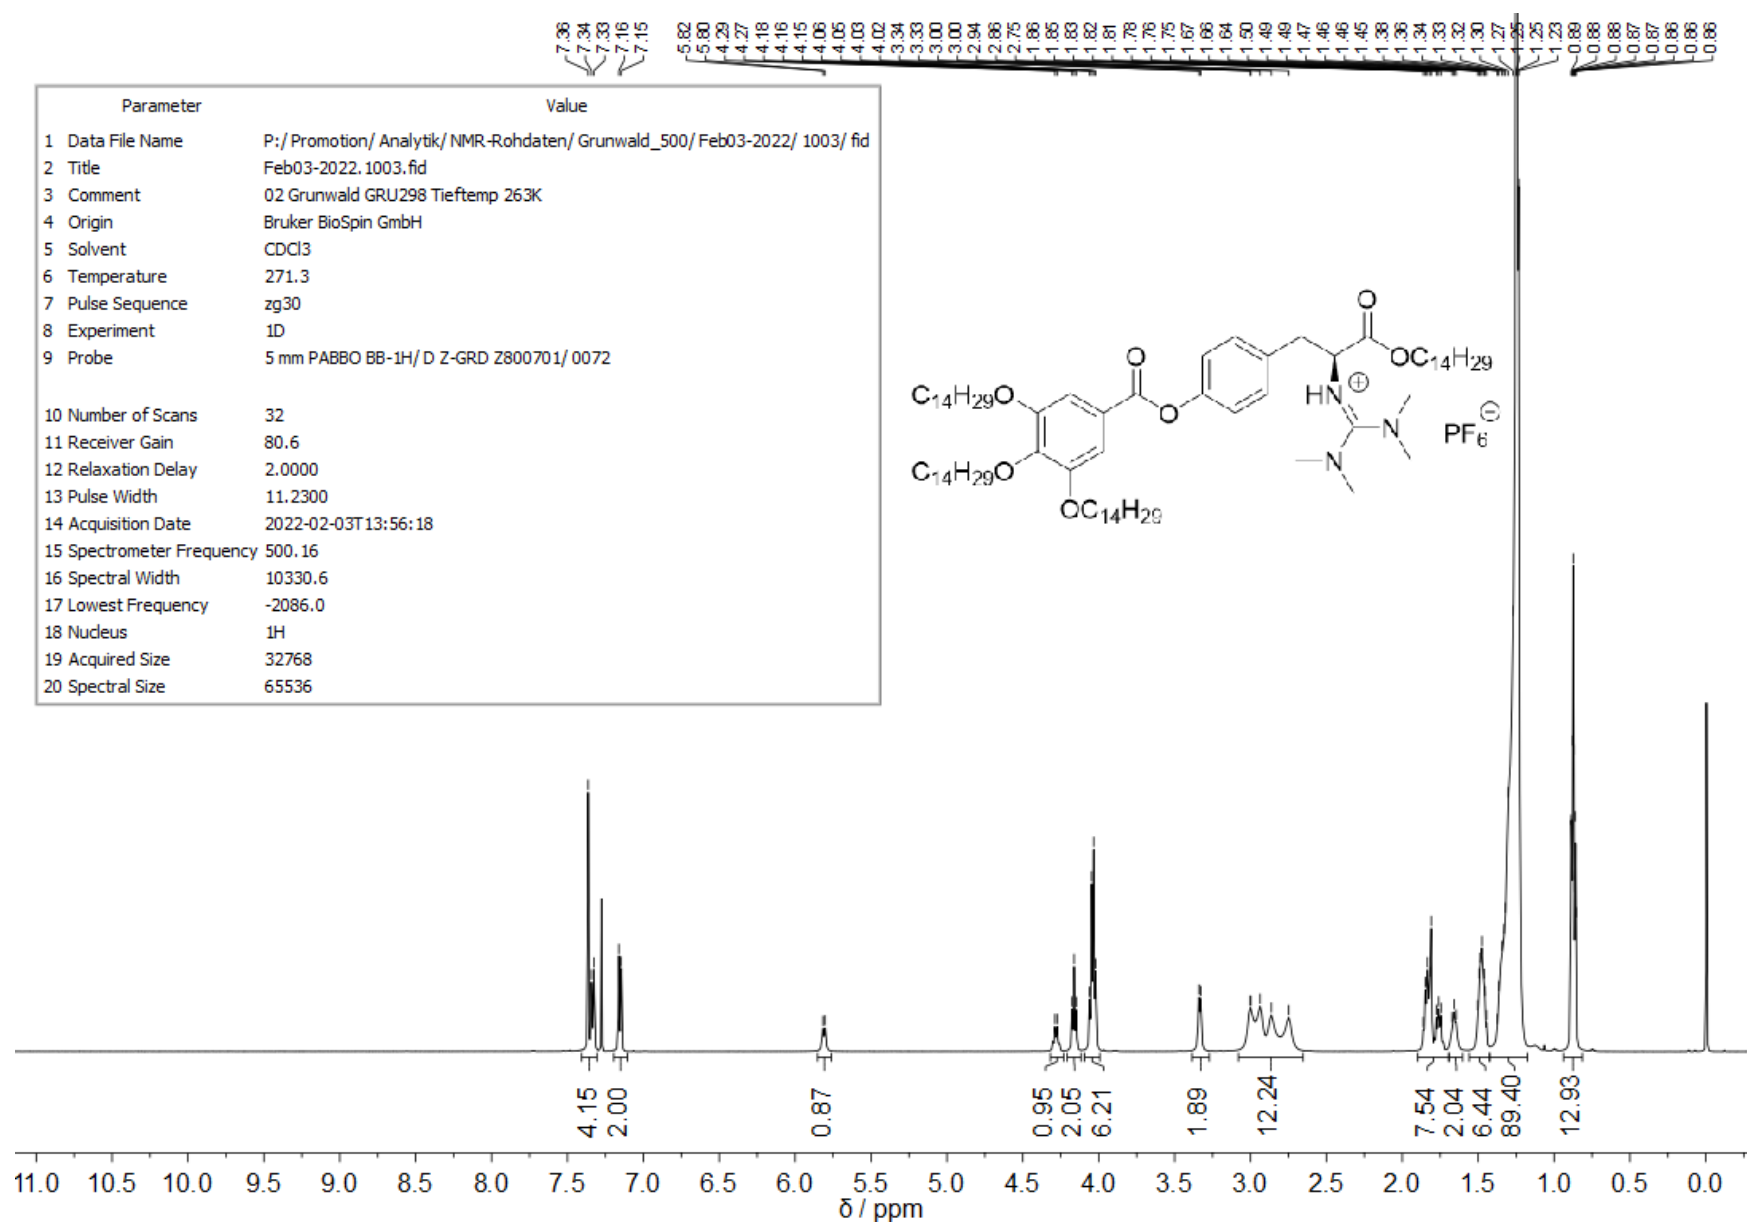

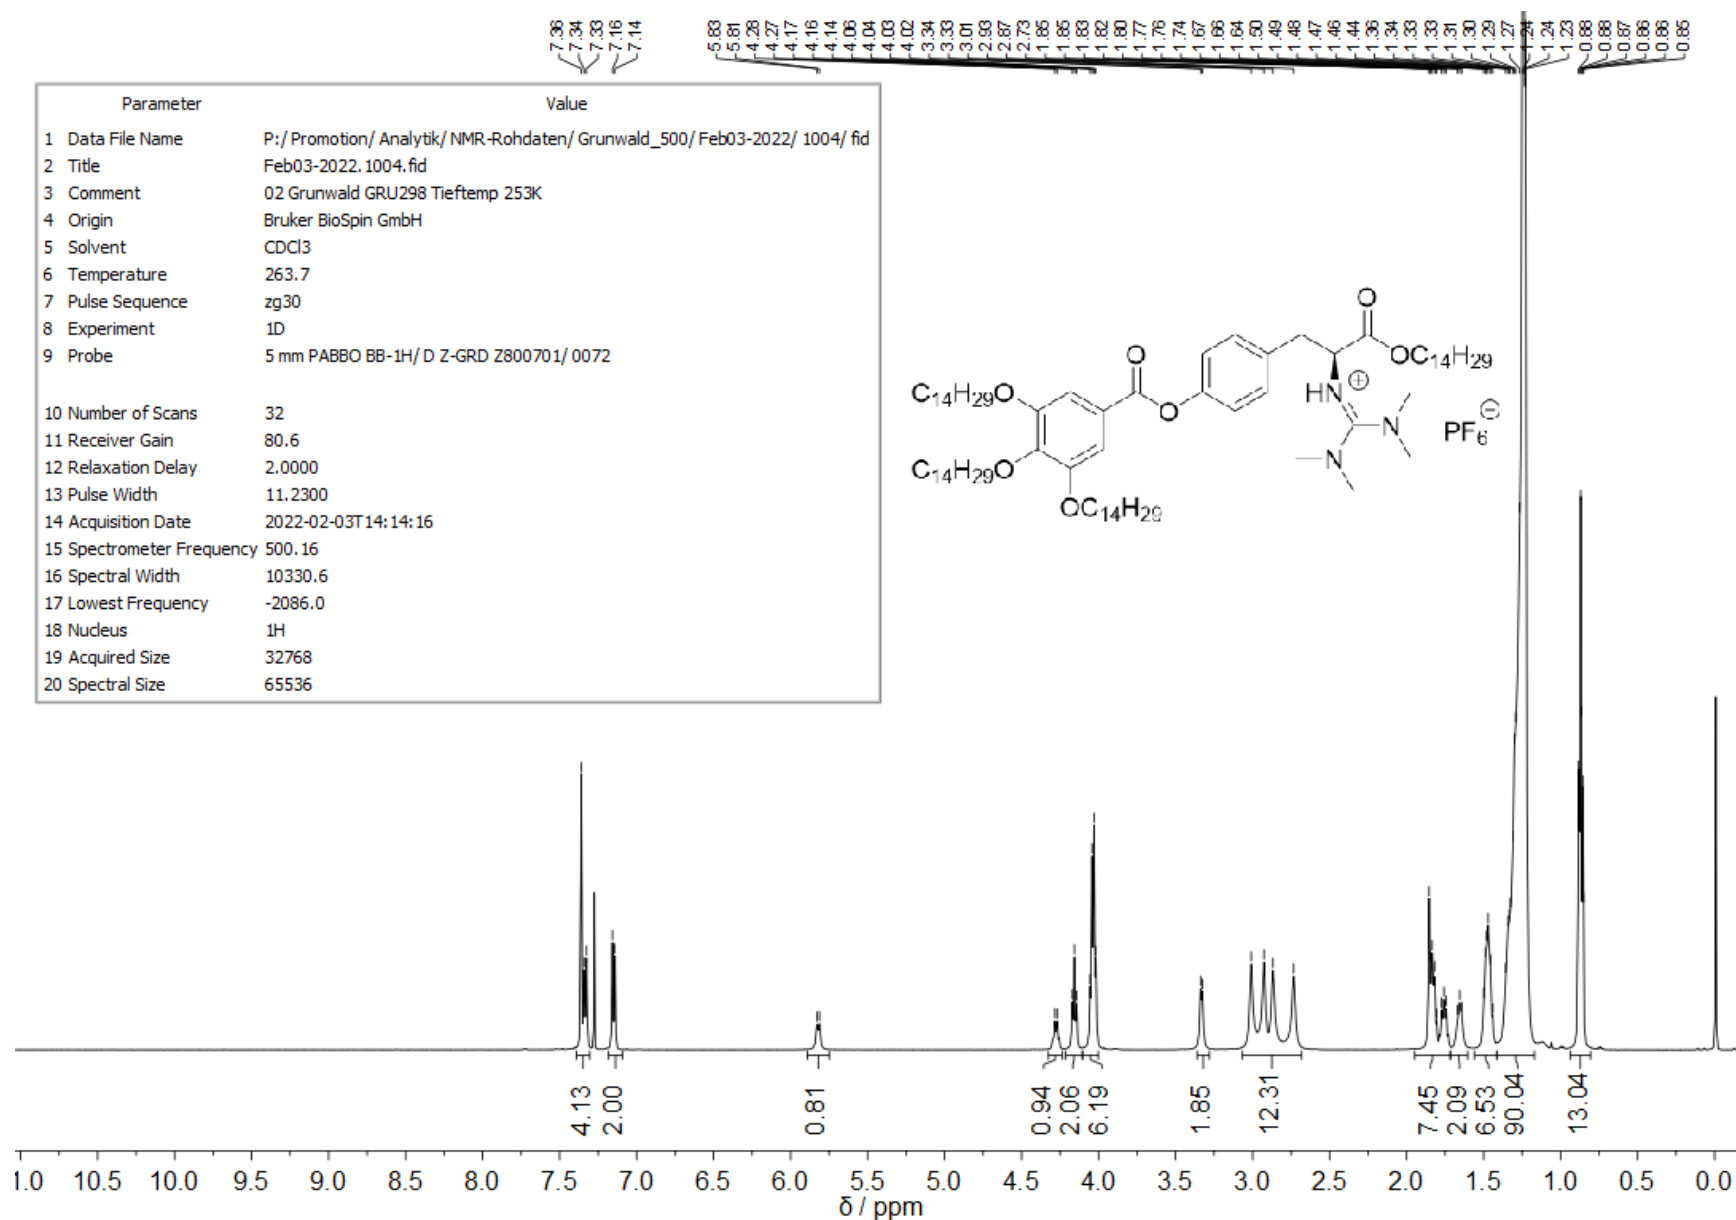

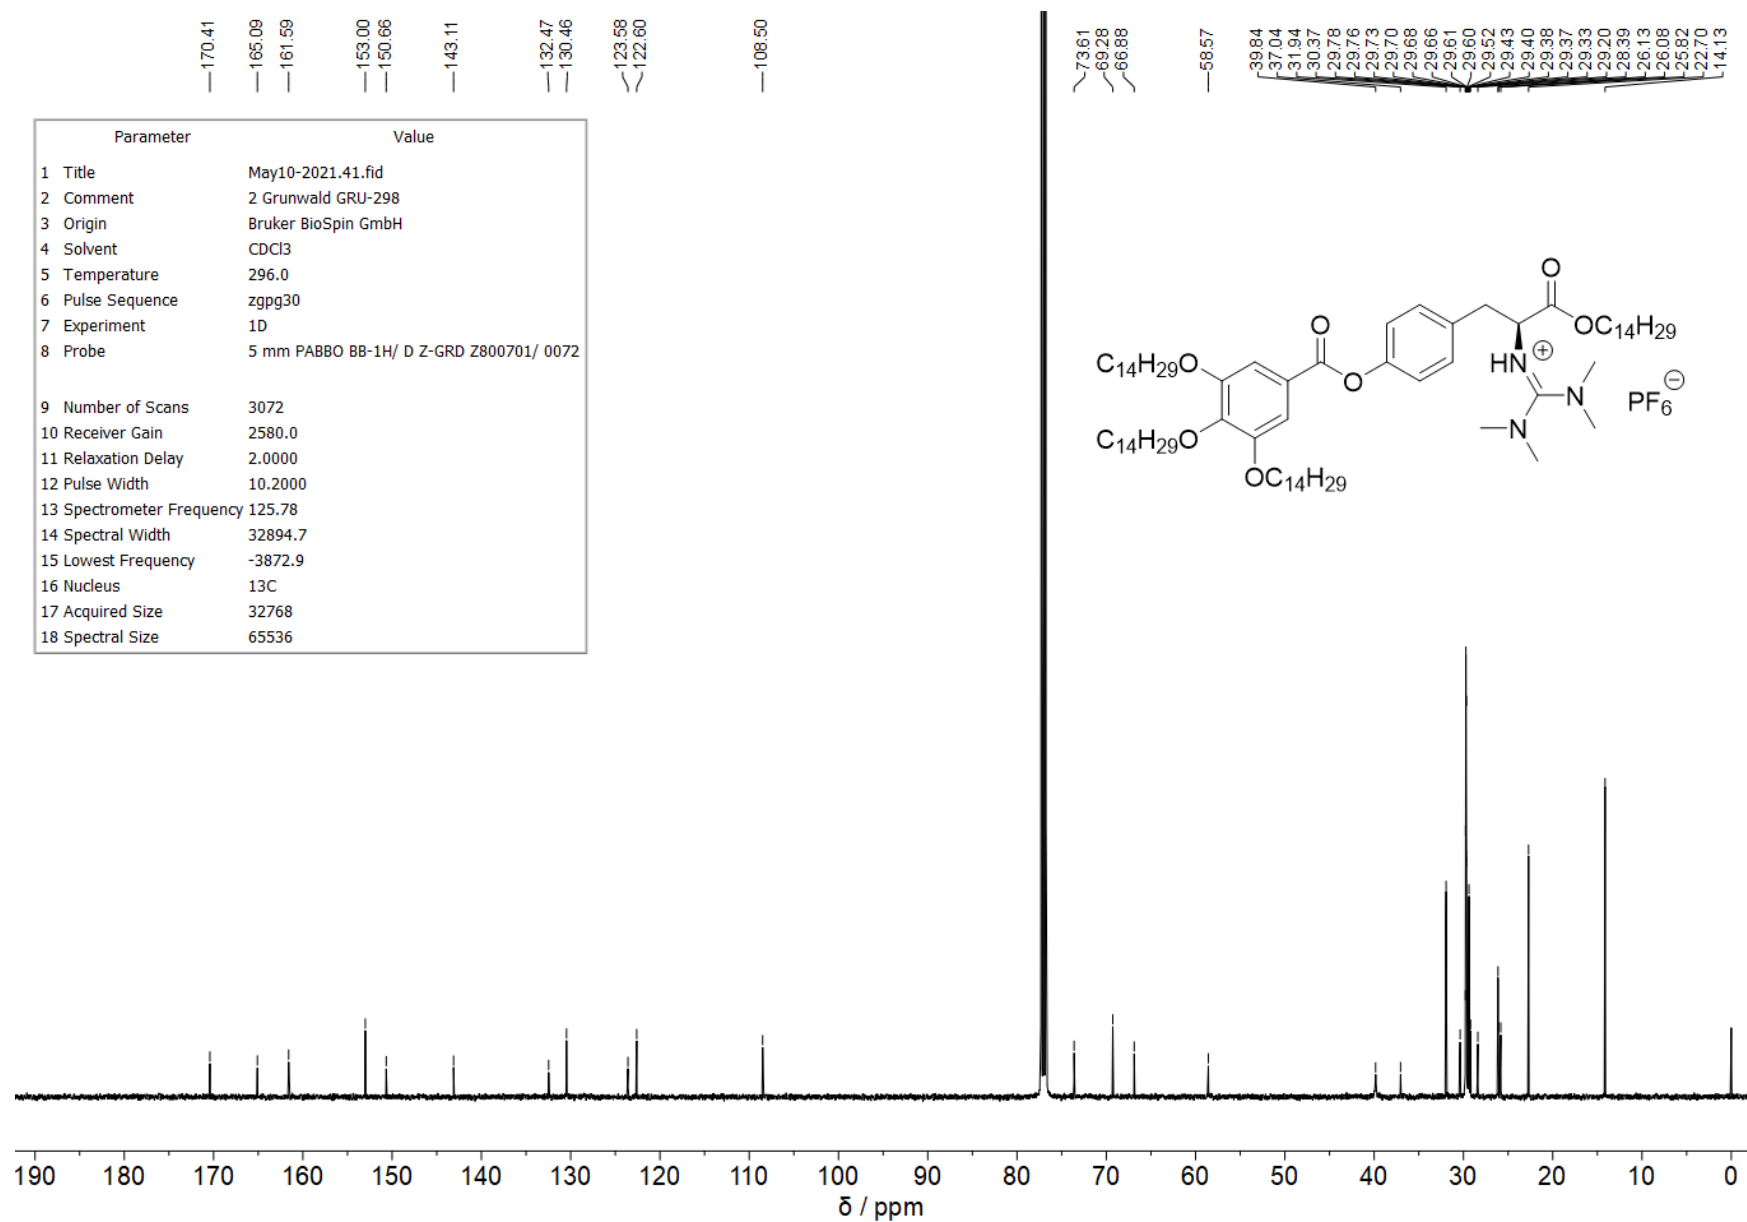



| Parameter                 | Value                                        |
|---------------------------|----------------------------------------------|
| 1 Title                   | May10-2021.220.fid                           |
| 2 Comment                 | 02 Grunwald GRU-298                          |
| 3 Origin                  | Bruker BioSpin GmbH                          |
| 4 Solvent                 | CDCl3                                        |
| 5 Temperature             | 298.0                                        |
| 6 Pulse Sequence          | zgfgqn                                       |
| 7 Experiment              | 1D                                           |
| 8 Probe                   | 5 mm PABBO BB/ 19F-1H/ D Z-GRD Z108618/ 0806 |
| 9 Number of Scans         | 32                                           |
| 10 Receiver Gain          | 205.3                                        |
| 11 Relaxation Delay       | 1.0000                                       |
| 12 Pulse Width            | 14.6500                                      |
| 13 Spectrometer Frequency | 376.43                                       |
| 14 Spectral Width         | 89285.7                                      |
| 15 Lowest Frequency       | -82289.9                                     |
| 16 Nucleus                | 19F                                          |
| 17 Acquired Size          | 65536                                        |
| 18 Spectral Size          | 131072                                       |

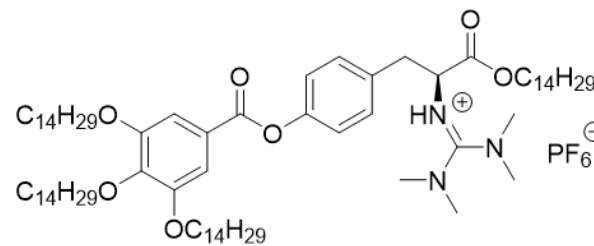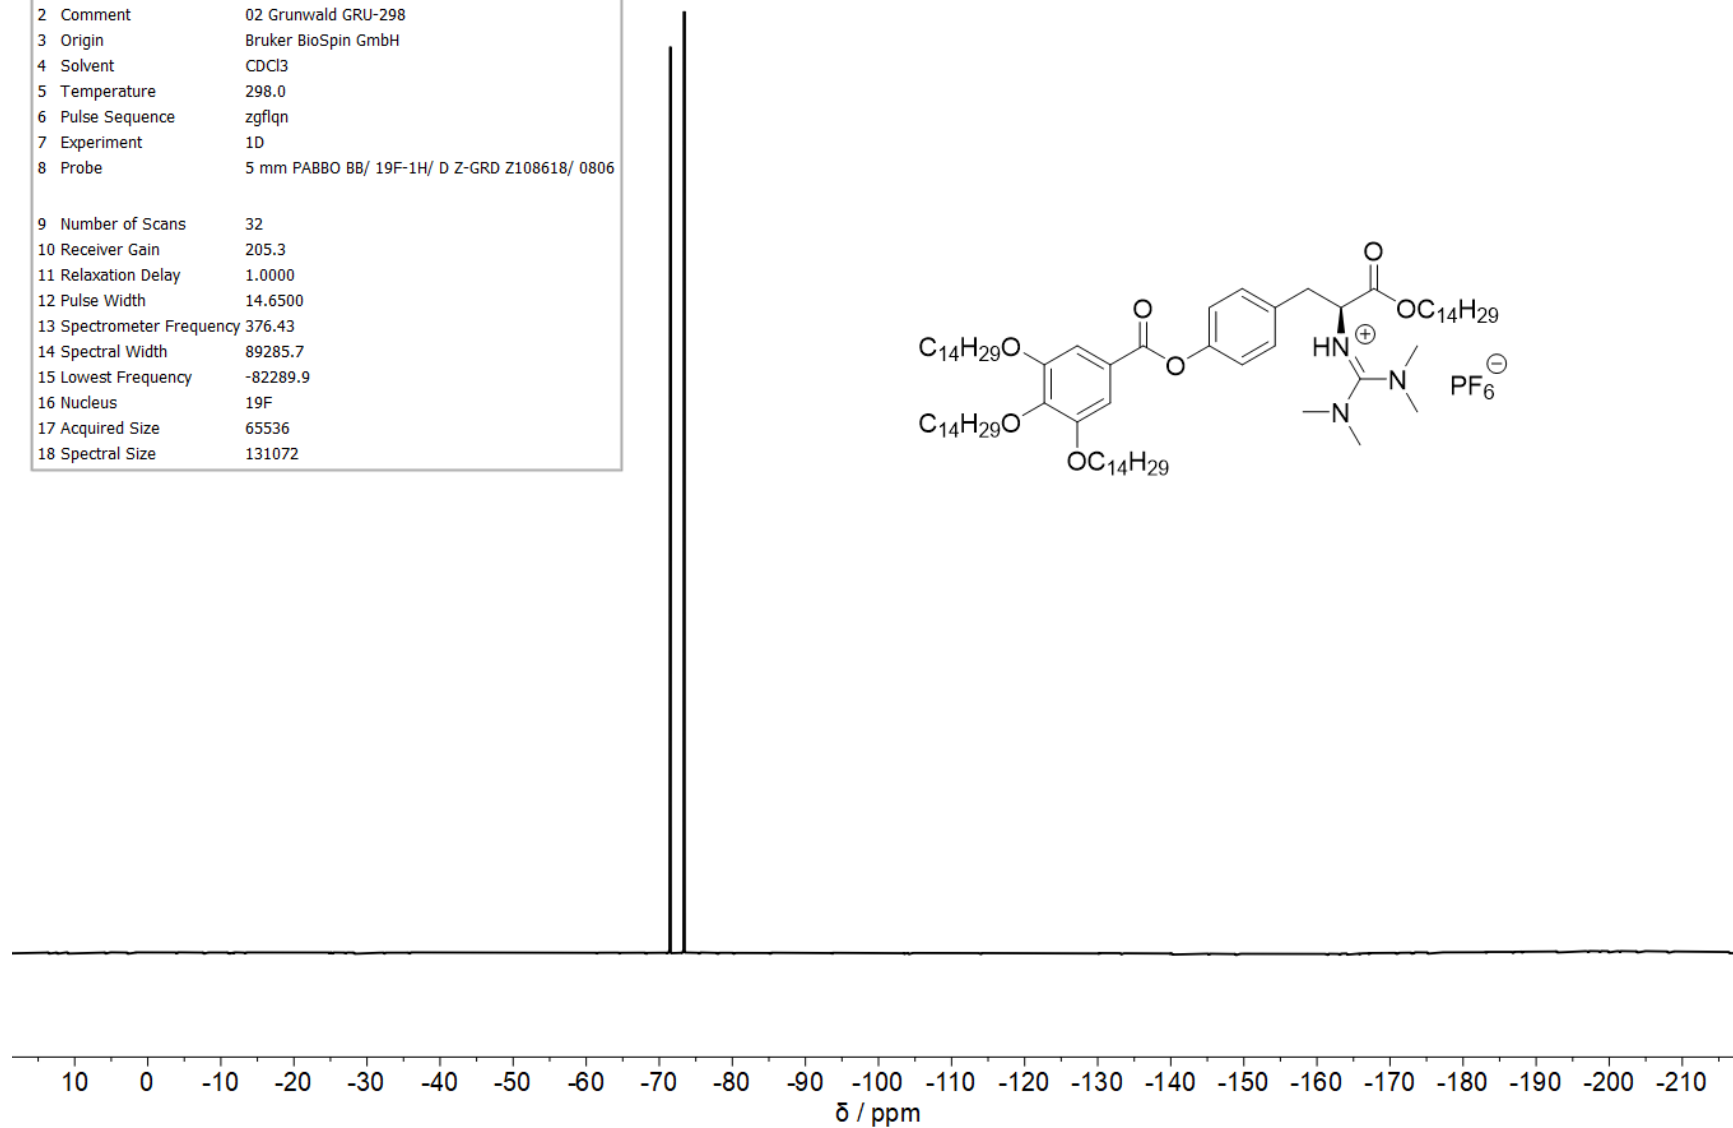

3,4,5-C<sub>14</sub>TyrC<sub>14</sub>BF<sub>4</sub>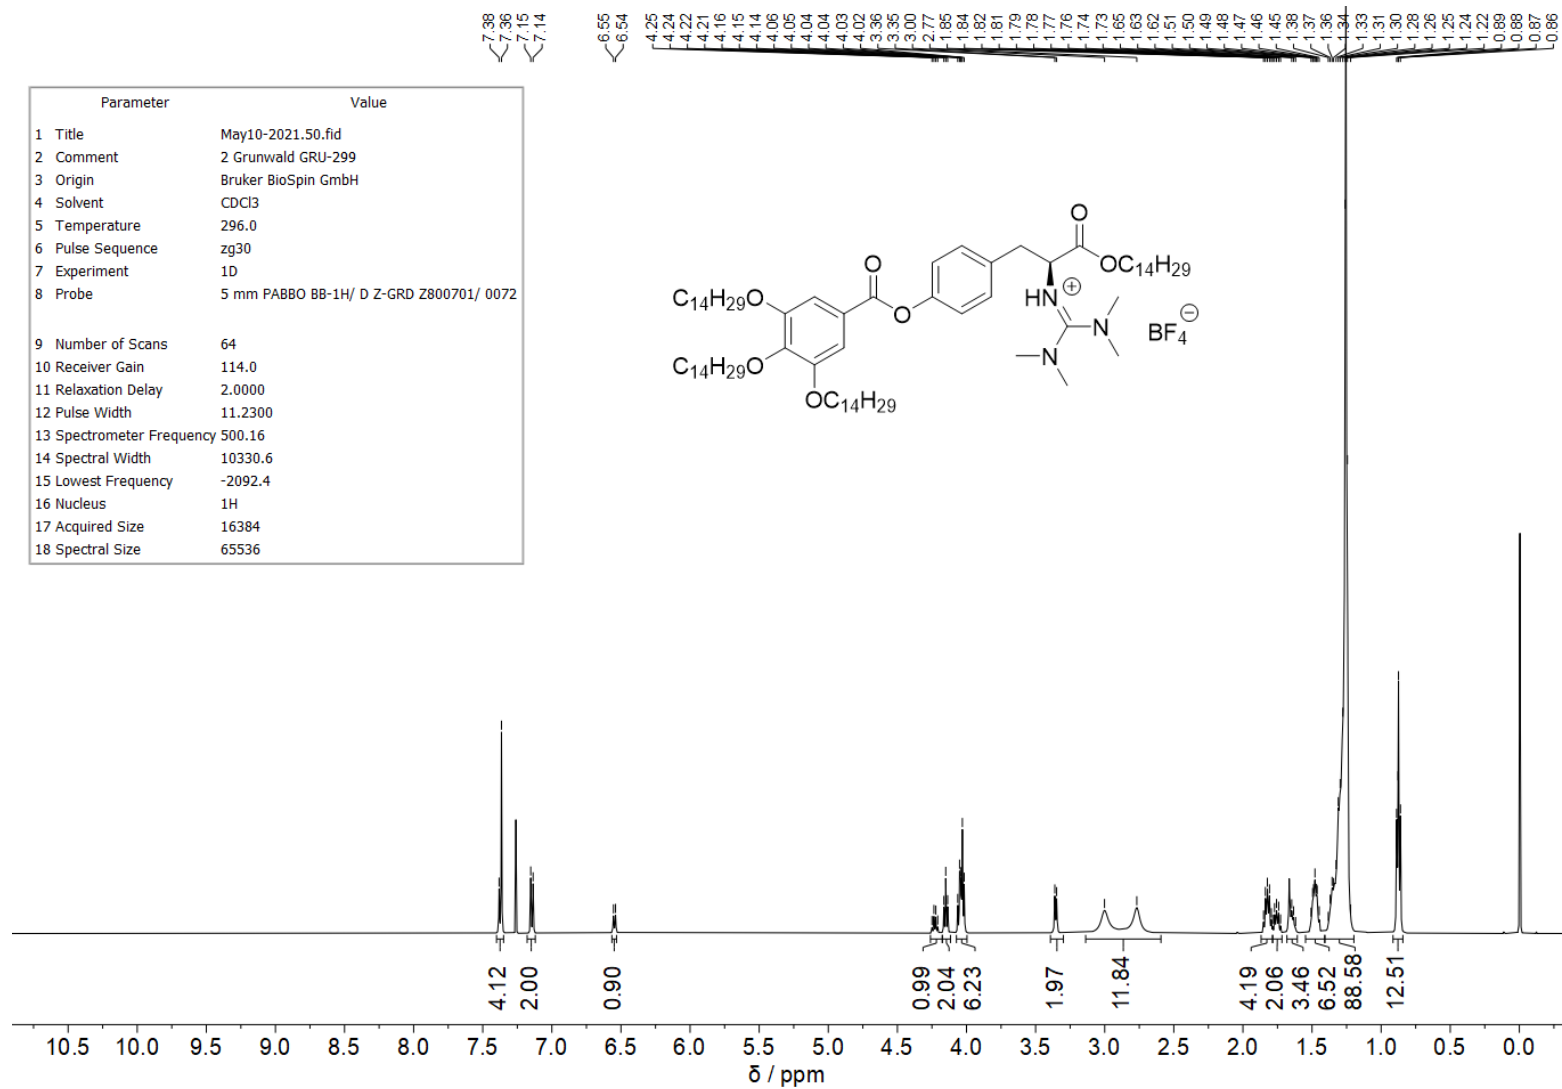

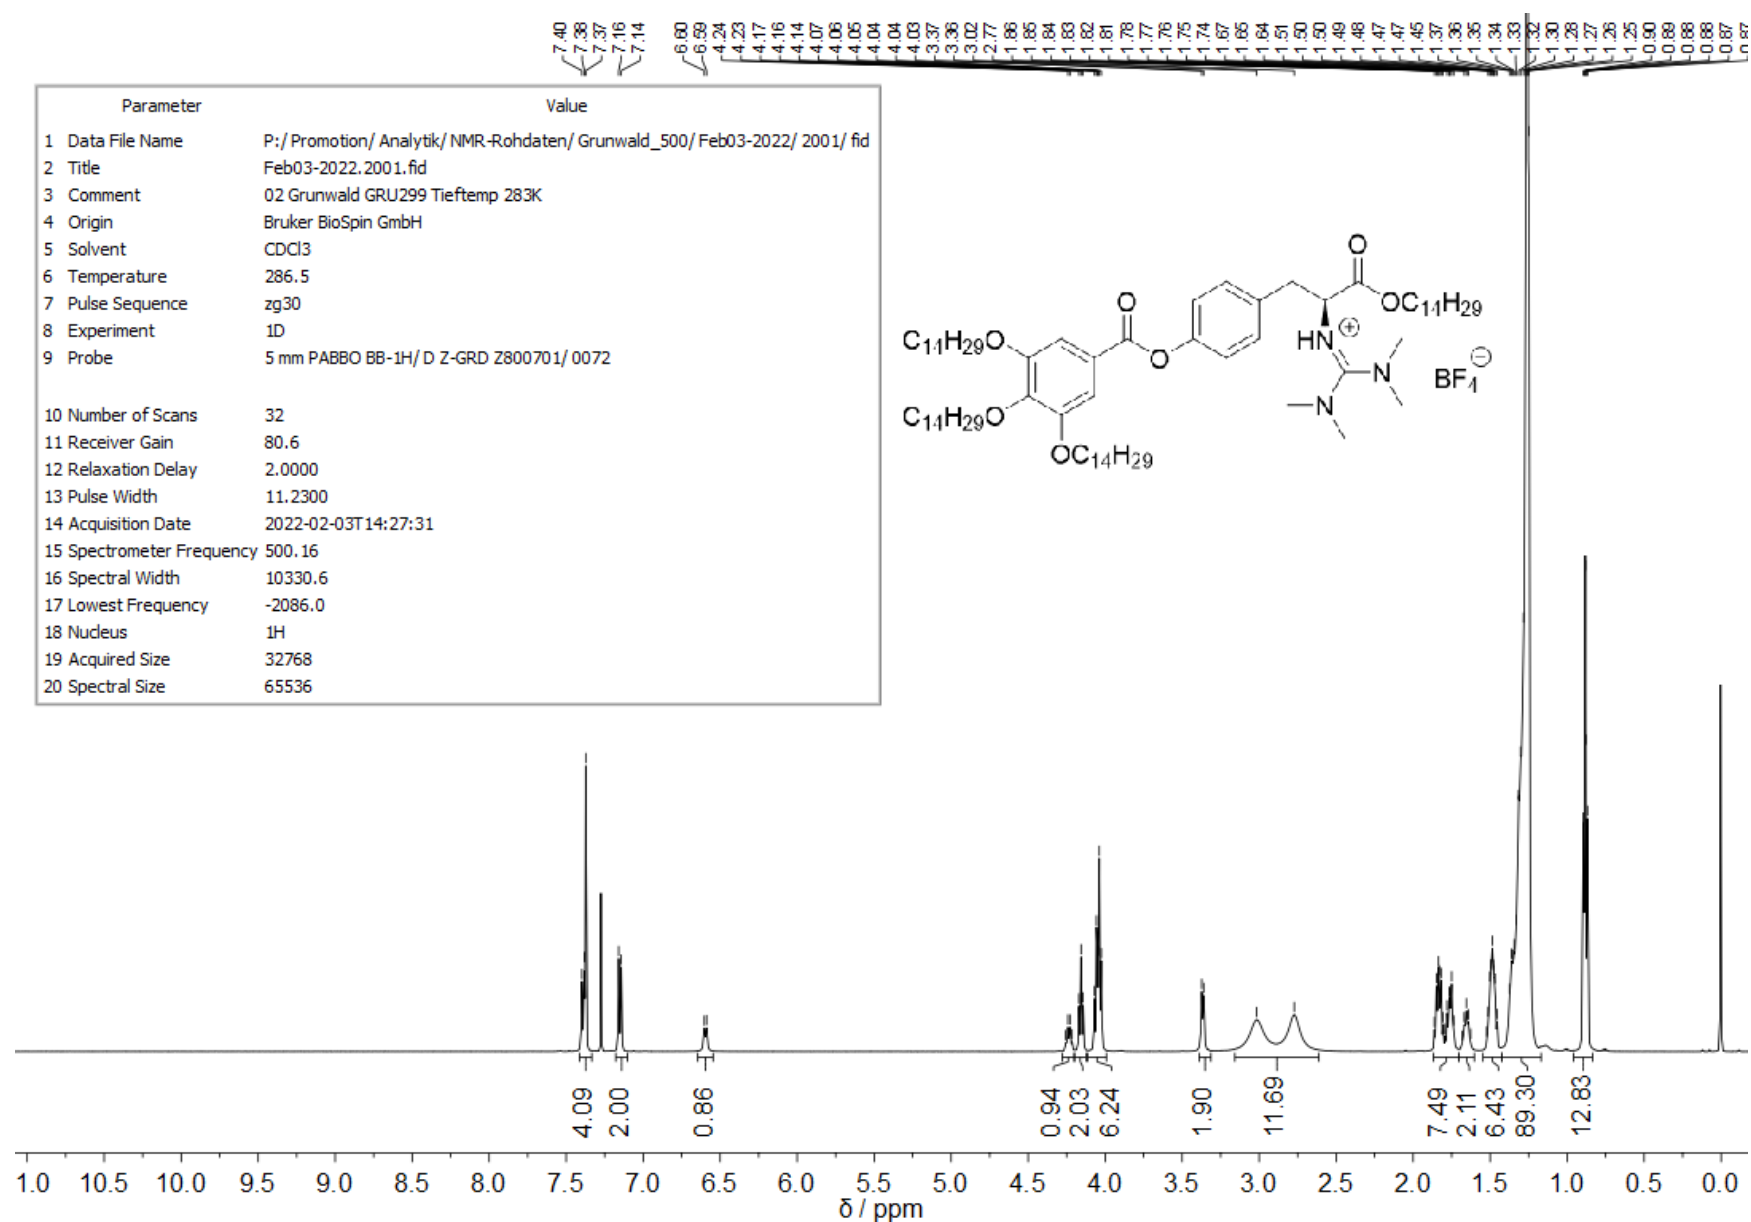

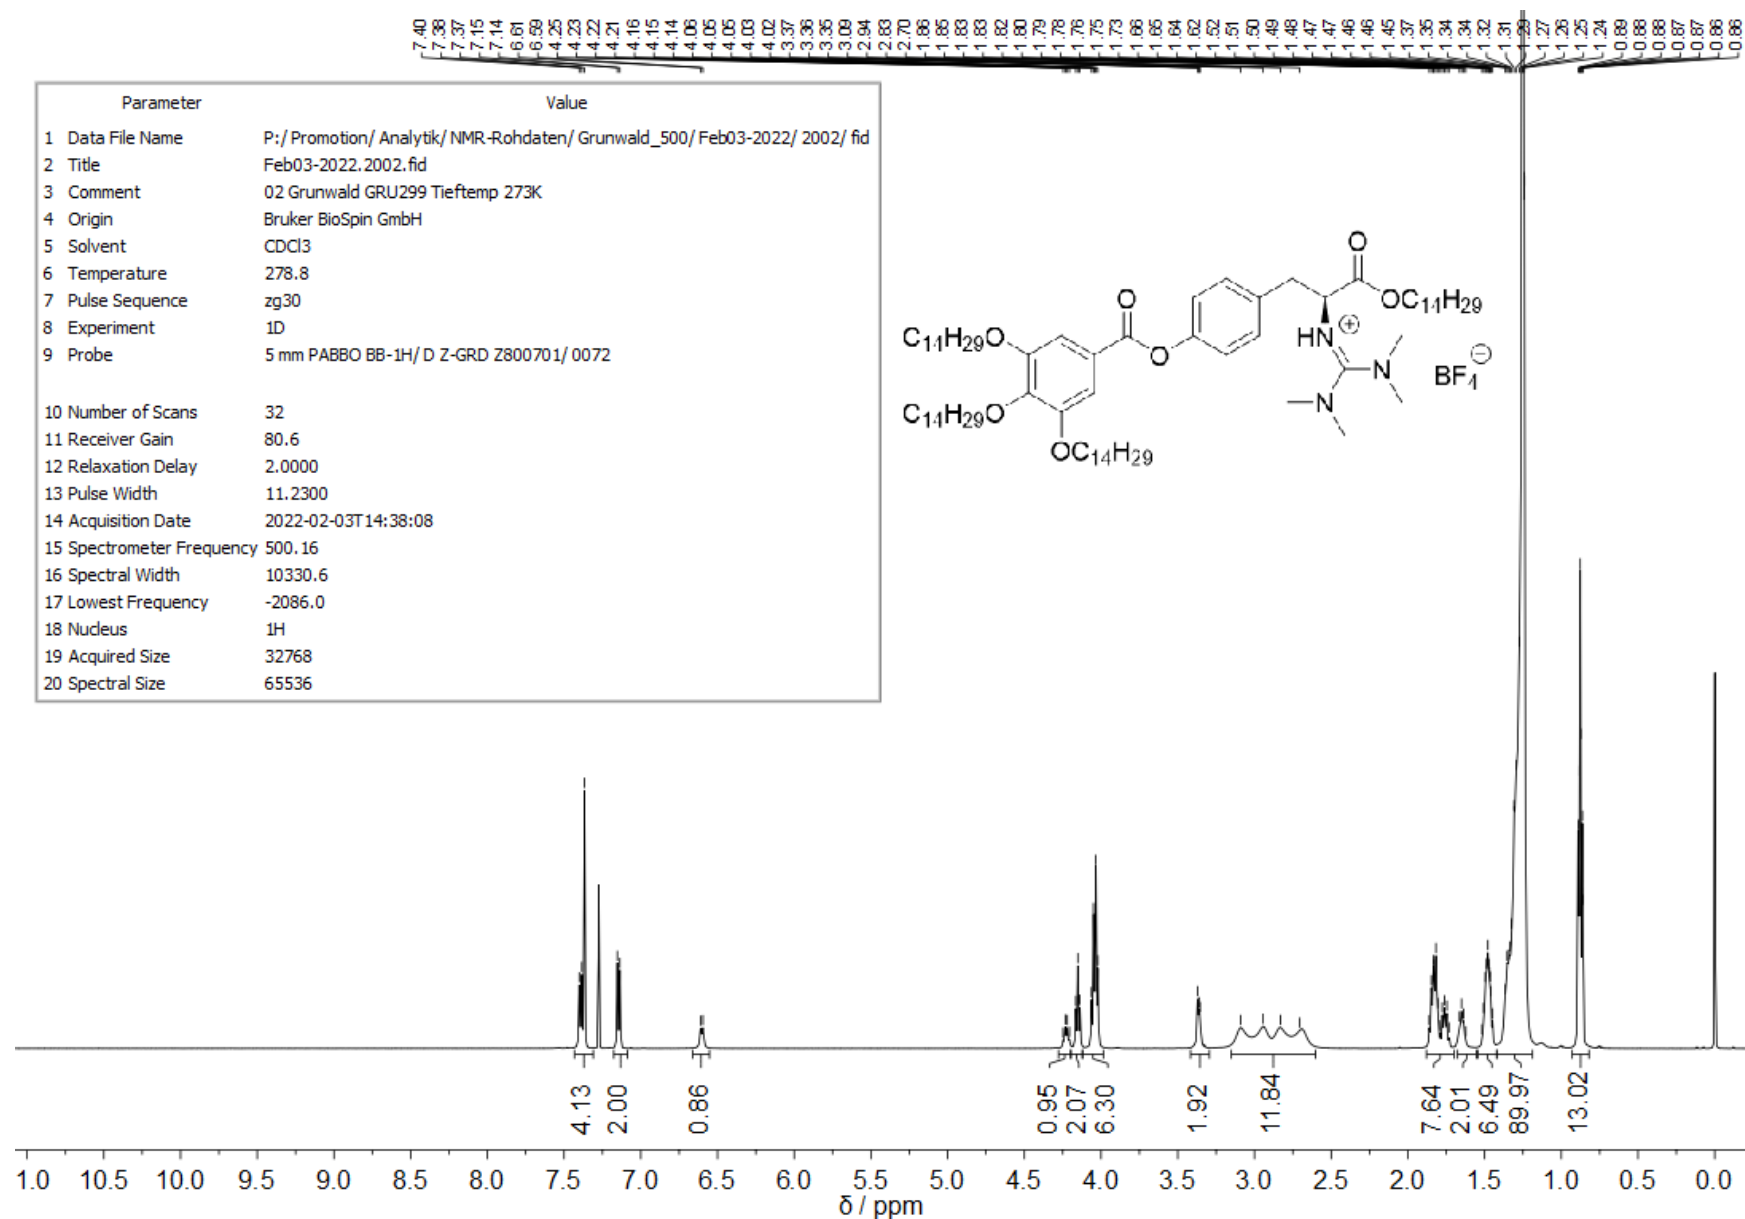

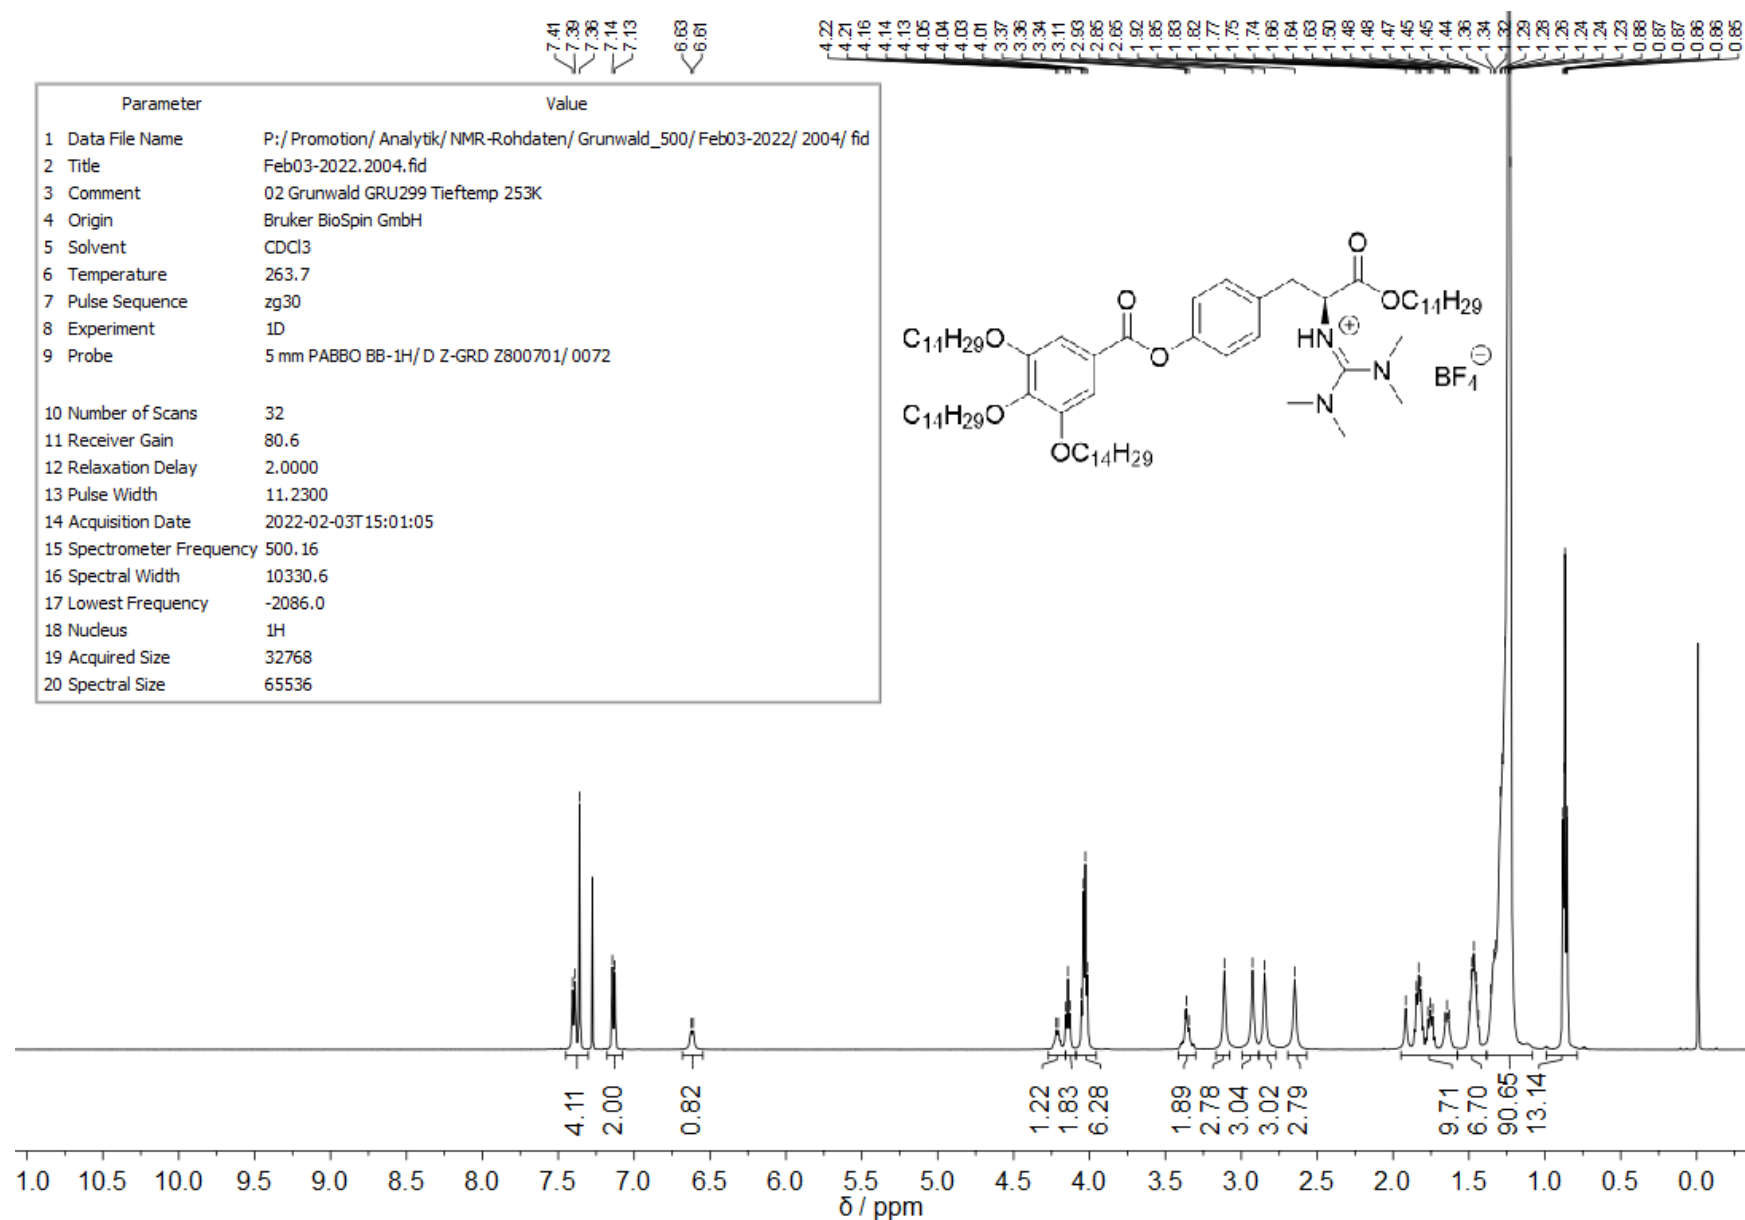

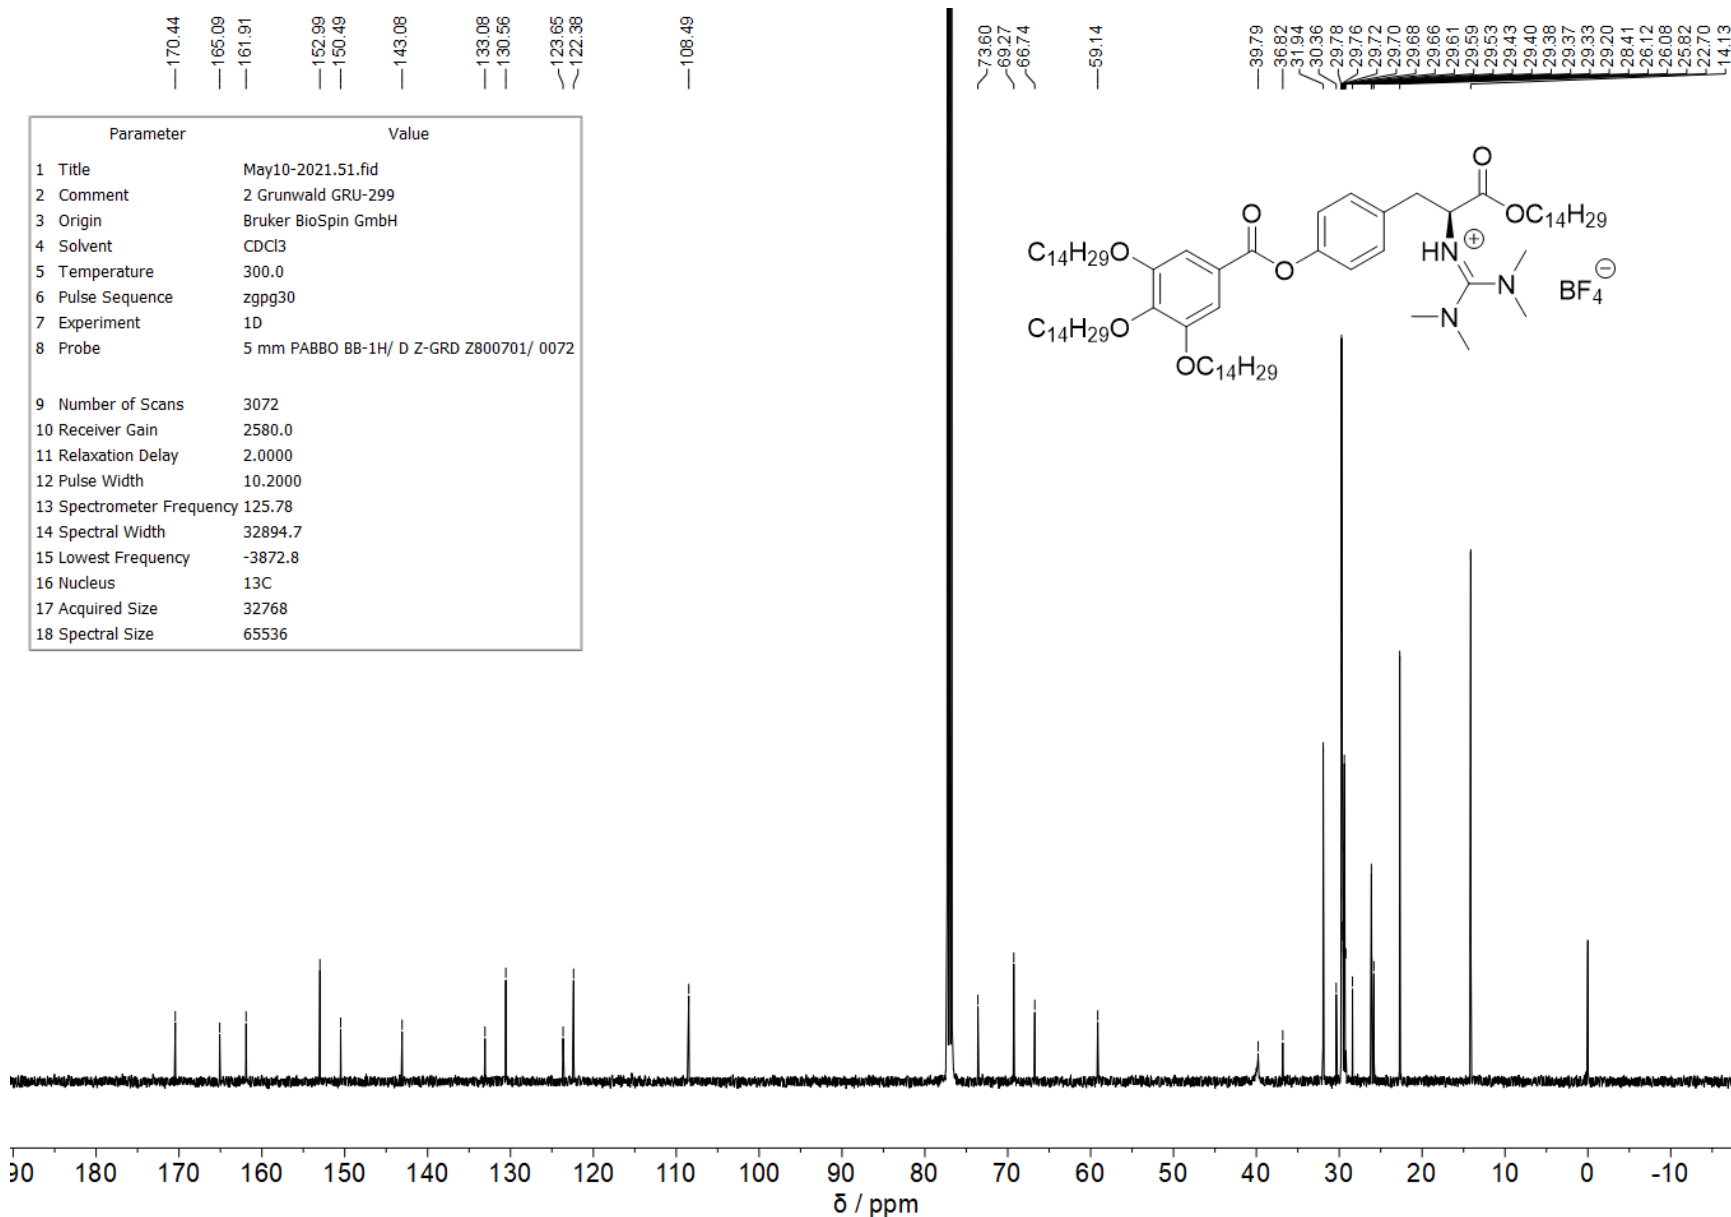

| Parameter                 | Value                                        |
|---------------------------|----------------------------------------------|
| 1 Title                   | May10-2021.230.fid                           |
| 2 Comment                 | 02 Grunwald GRU-299                          |
| 3 Origin                  | Bruker BioSpin GmbH                          |
| 4 Solvent                 | CDCl3                                        |
| 5 Temperature             | 298.0                                        |
| 6 Pulse Sequence          | zgfgqn                                       |
| 7 Experiment              | 1D                                           |
| 8 Probe                   | 5 mm PABBO BB/ 19F-1H/ D Z-GRD Z108618/ 0806 |
| 9 Number of Scans         | 32                                           |
| 10 Receiver Gain          | 205.3                                        |
| 11 Relaxation Delay       | 1.0000                                       |
| 12 Pulse Width            | 14.6500                                      |
| 13 Spectrometer Frequency | 376.43                                       |
| 14 Spectral Width         | 89285.7                                      |
| 15 Lowest Frequency       | -82289.9                                     |
| 16 Nucleus                | 19F                                          |
| 17 Acquired Size          | 65536                                        |
| 18 Spectral Size          | 131072                                       |

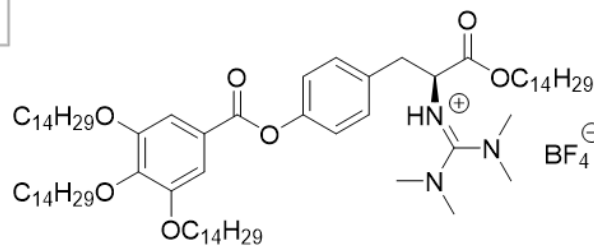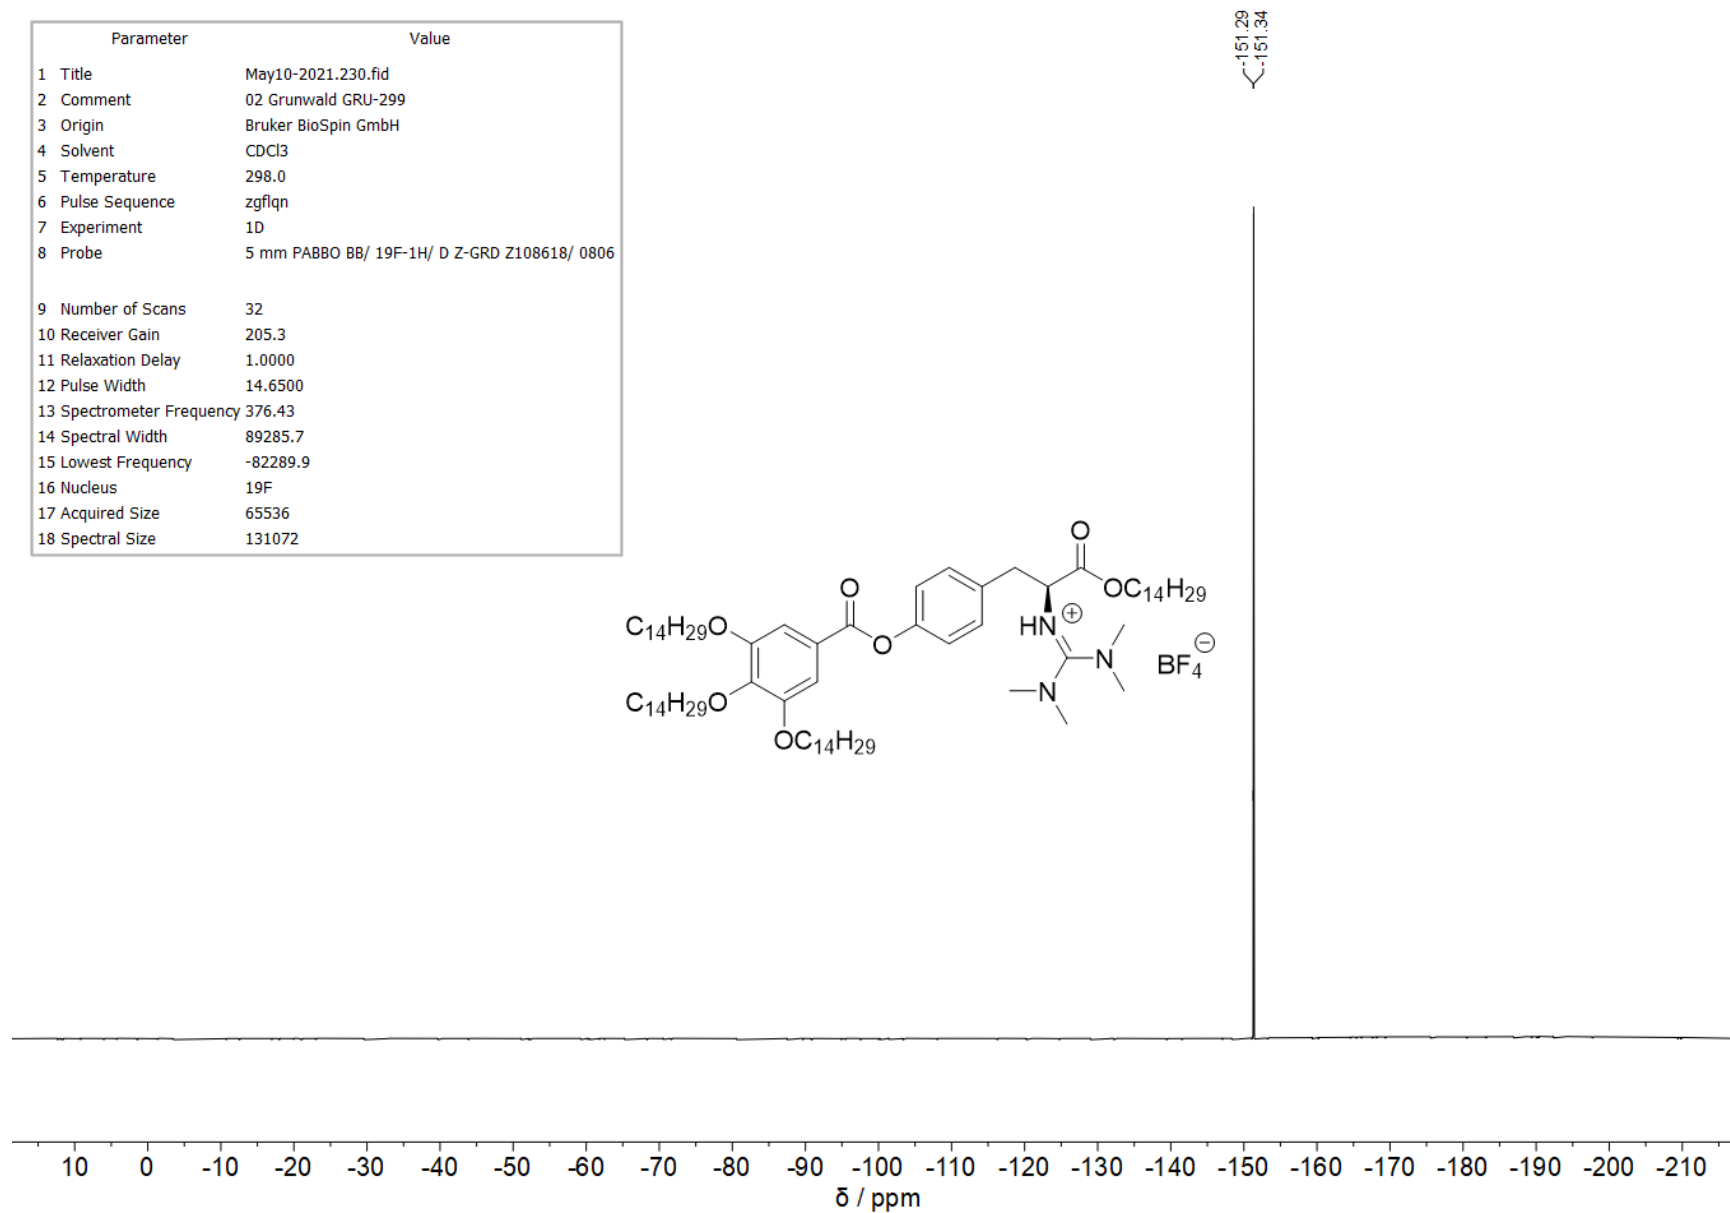

## 3,4,5-C14TyrC14SCN

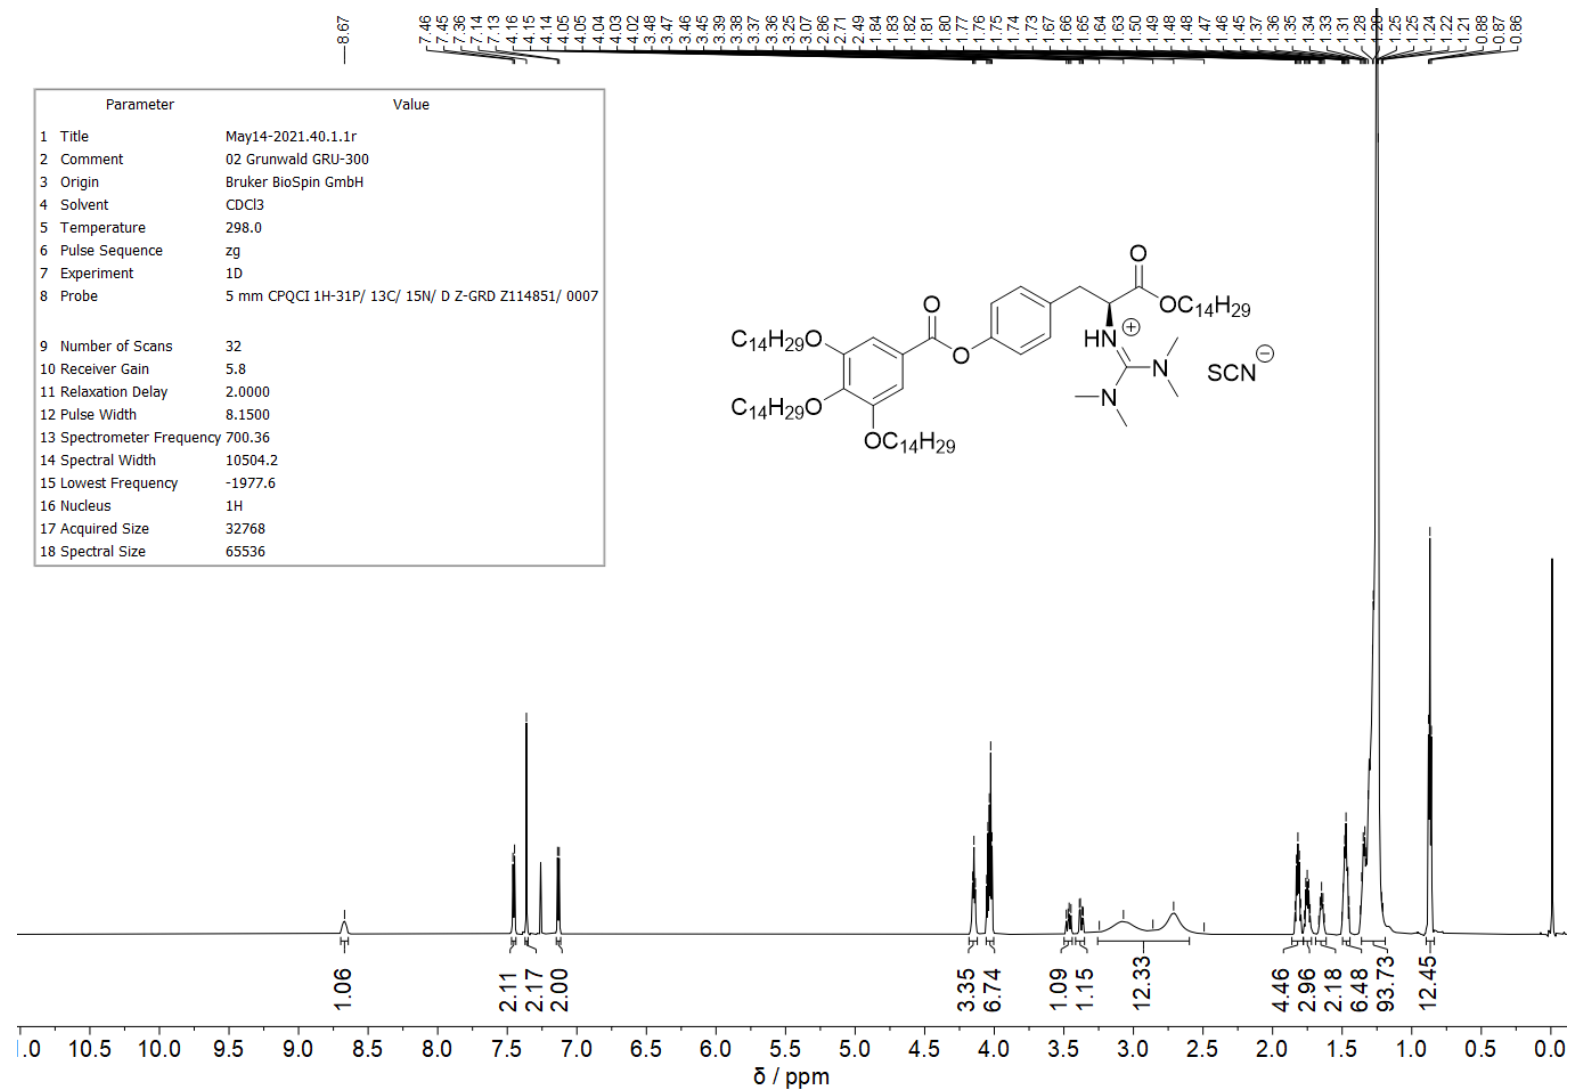



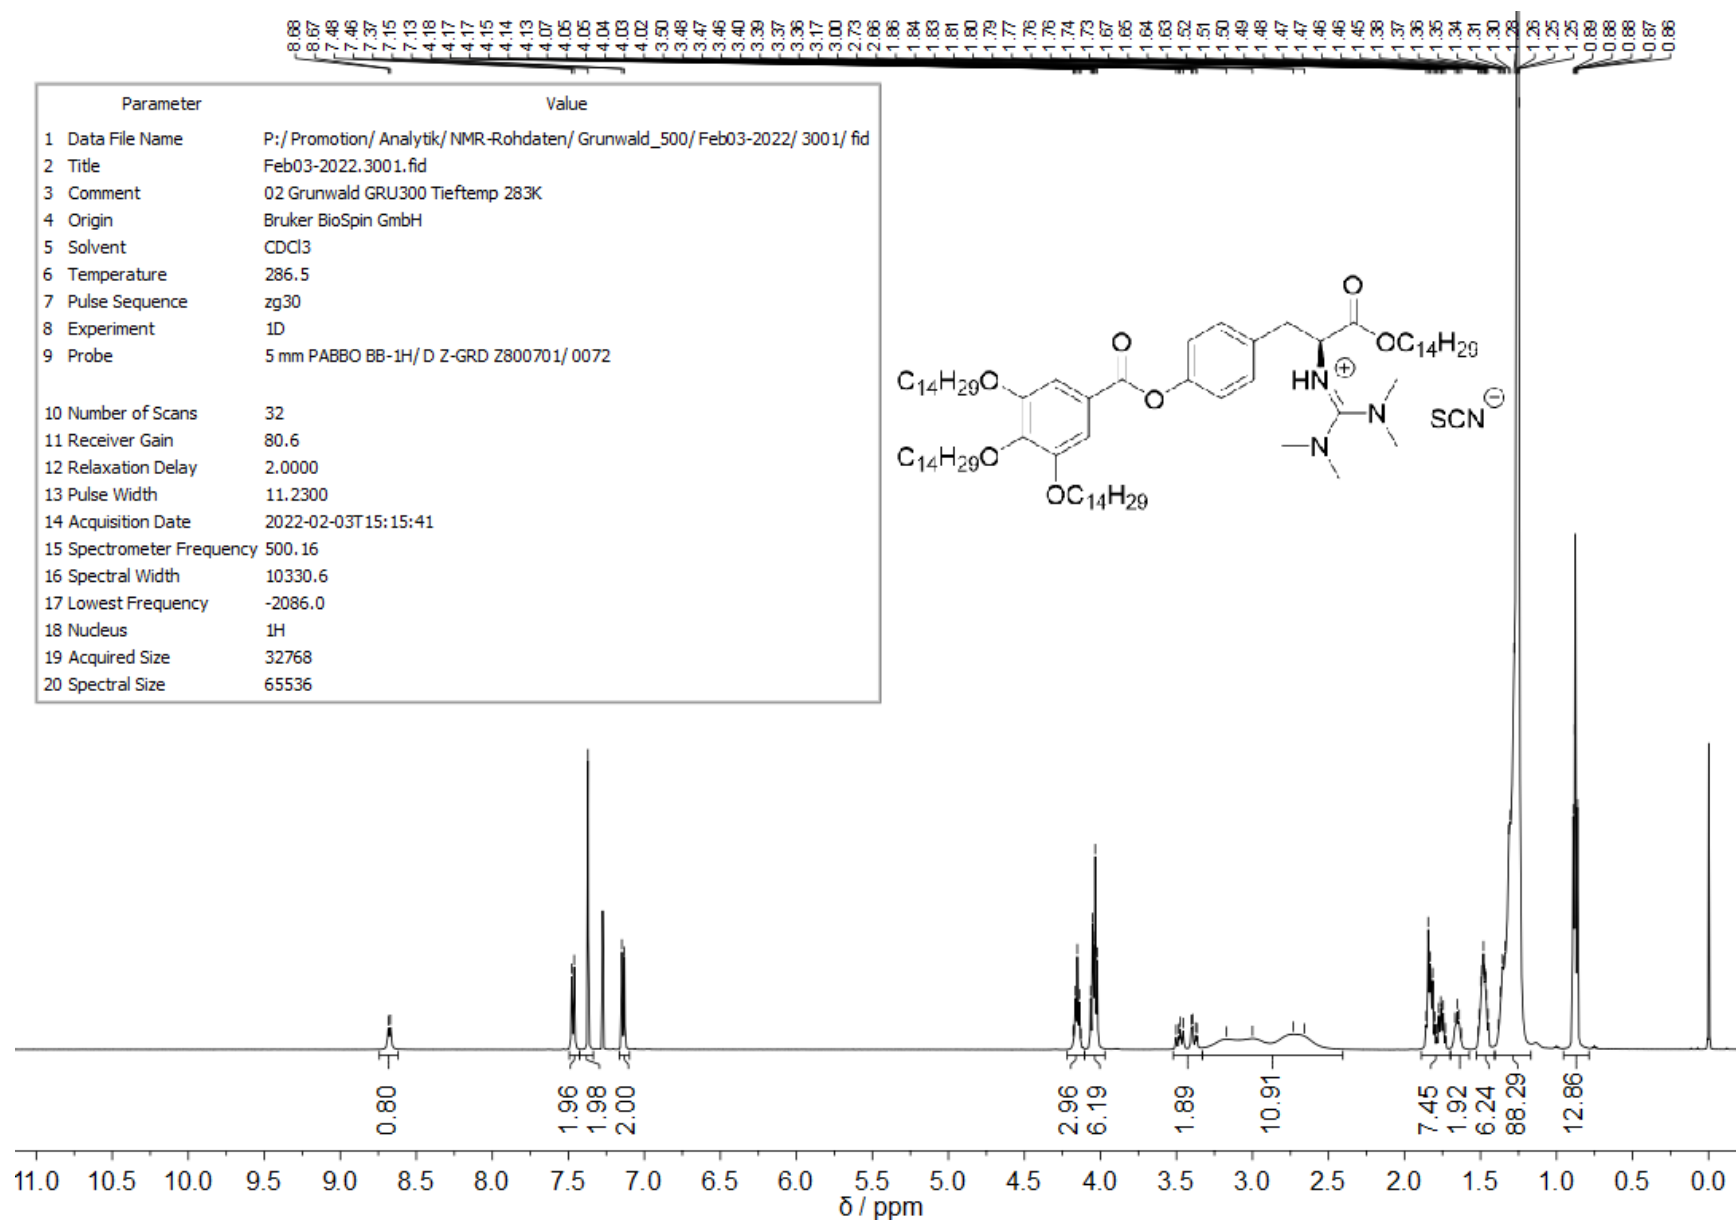

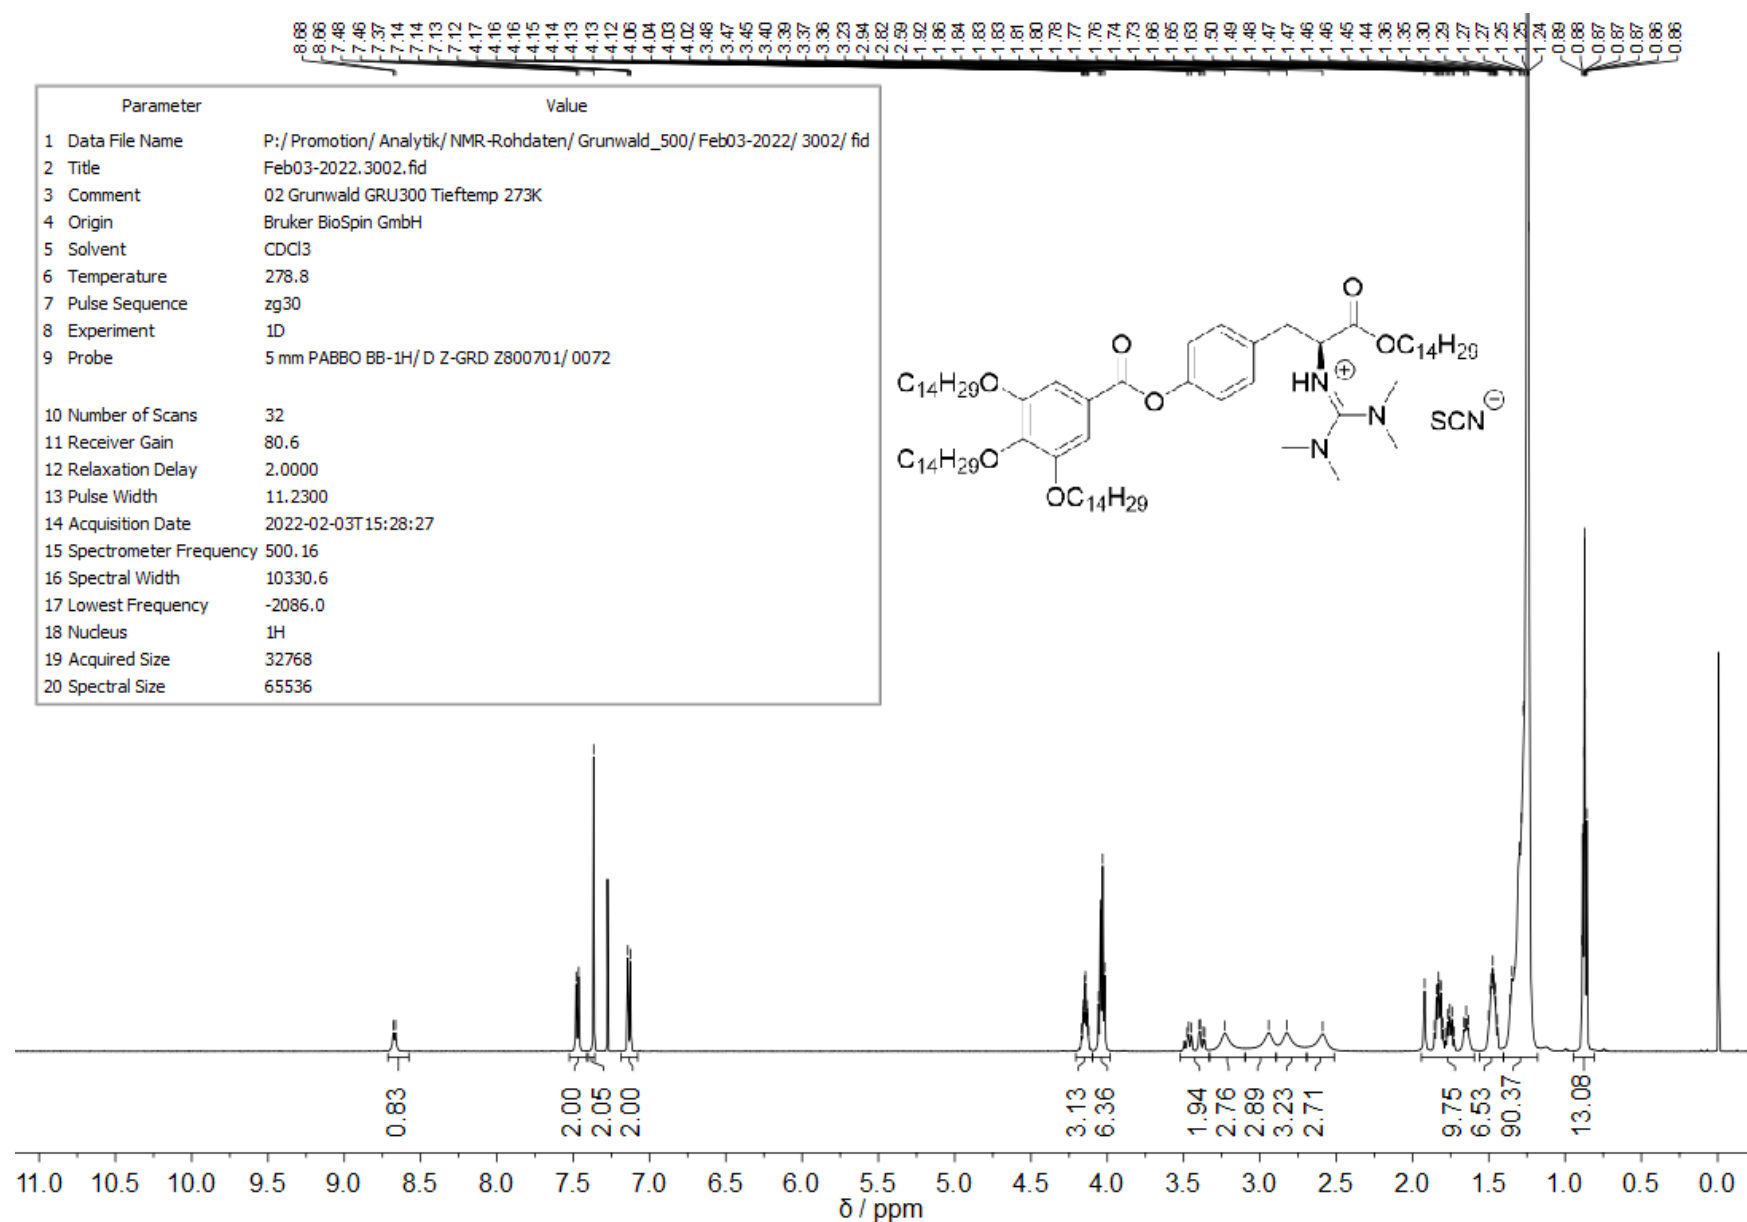

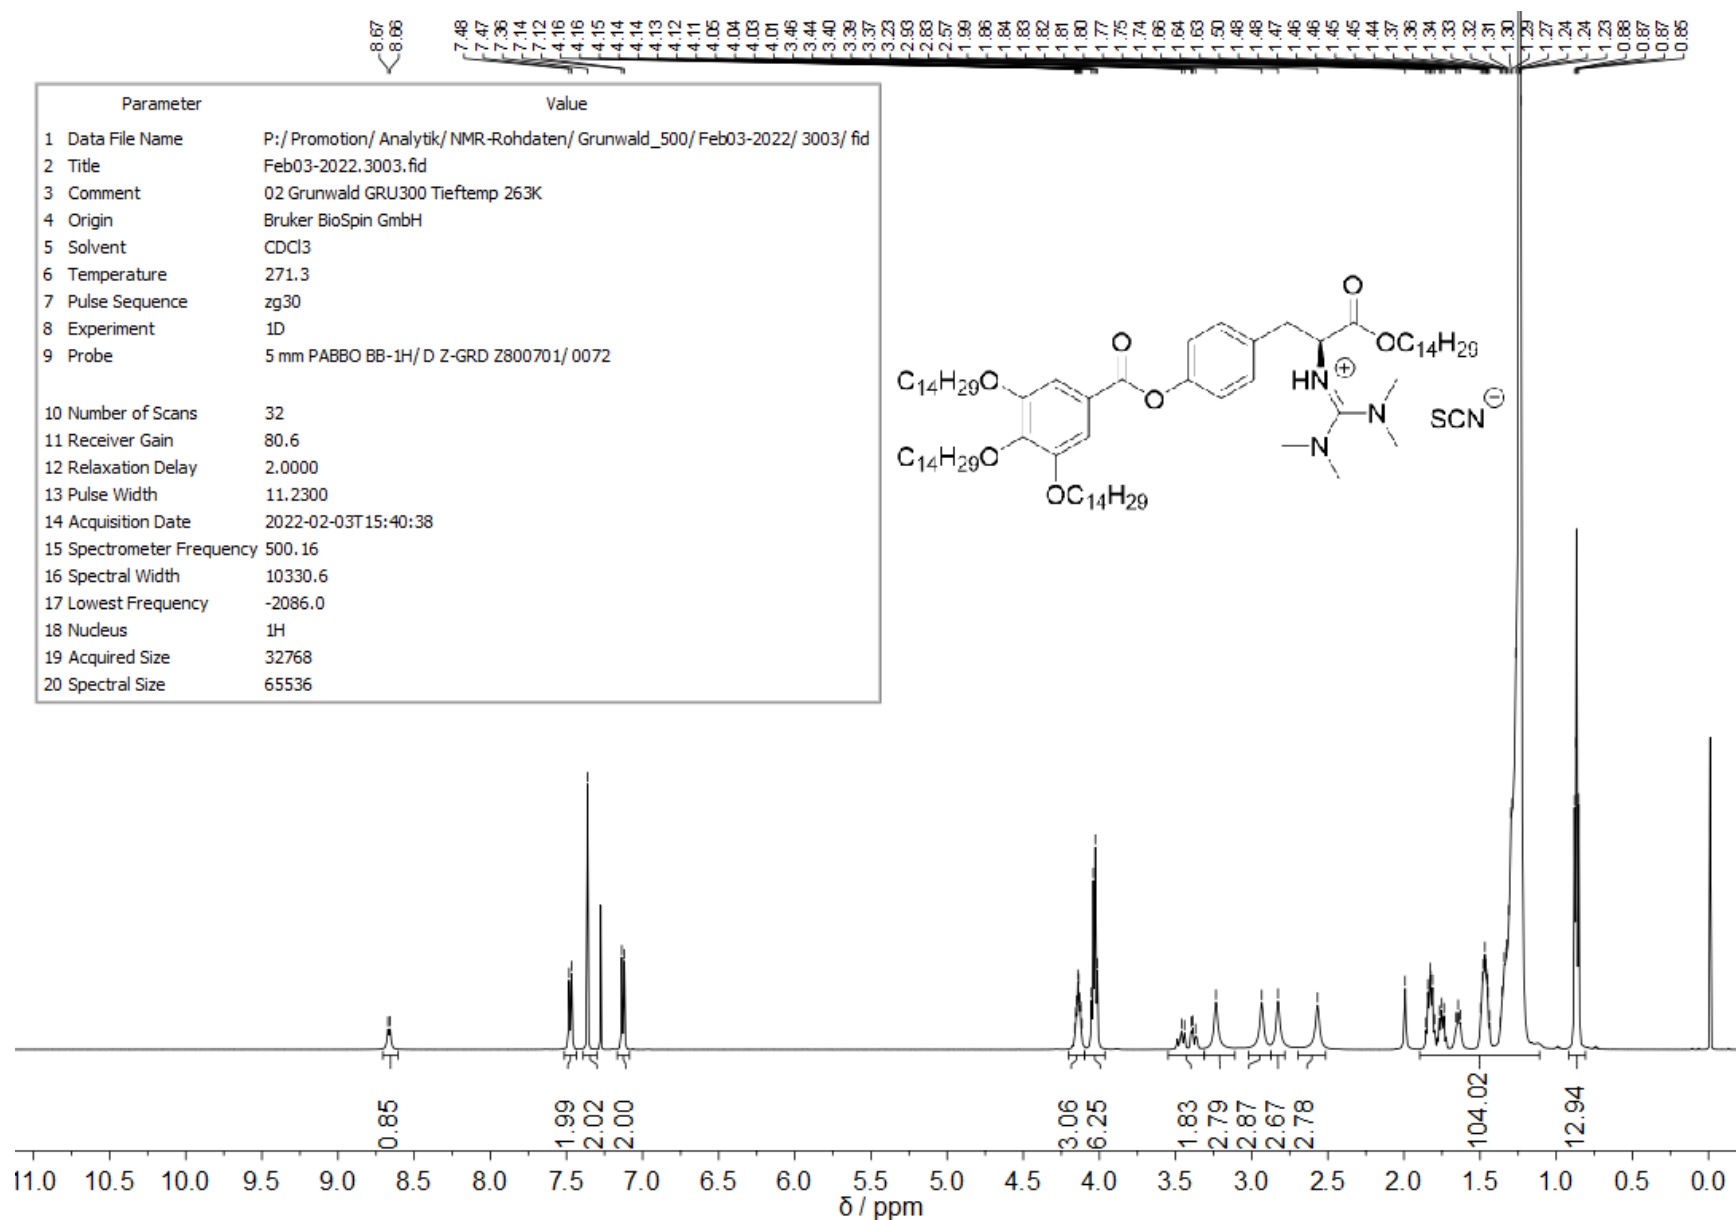

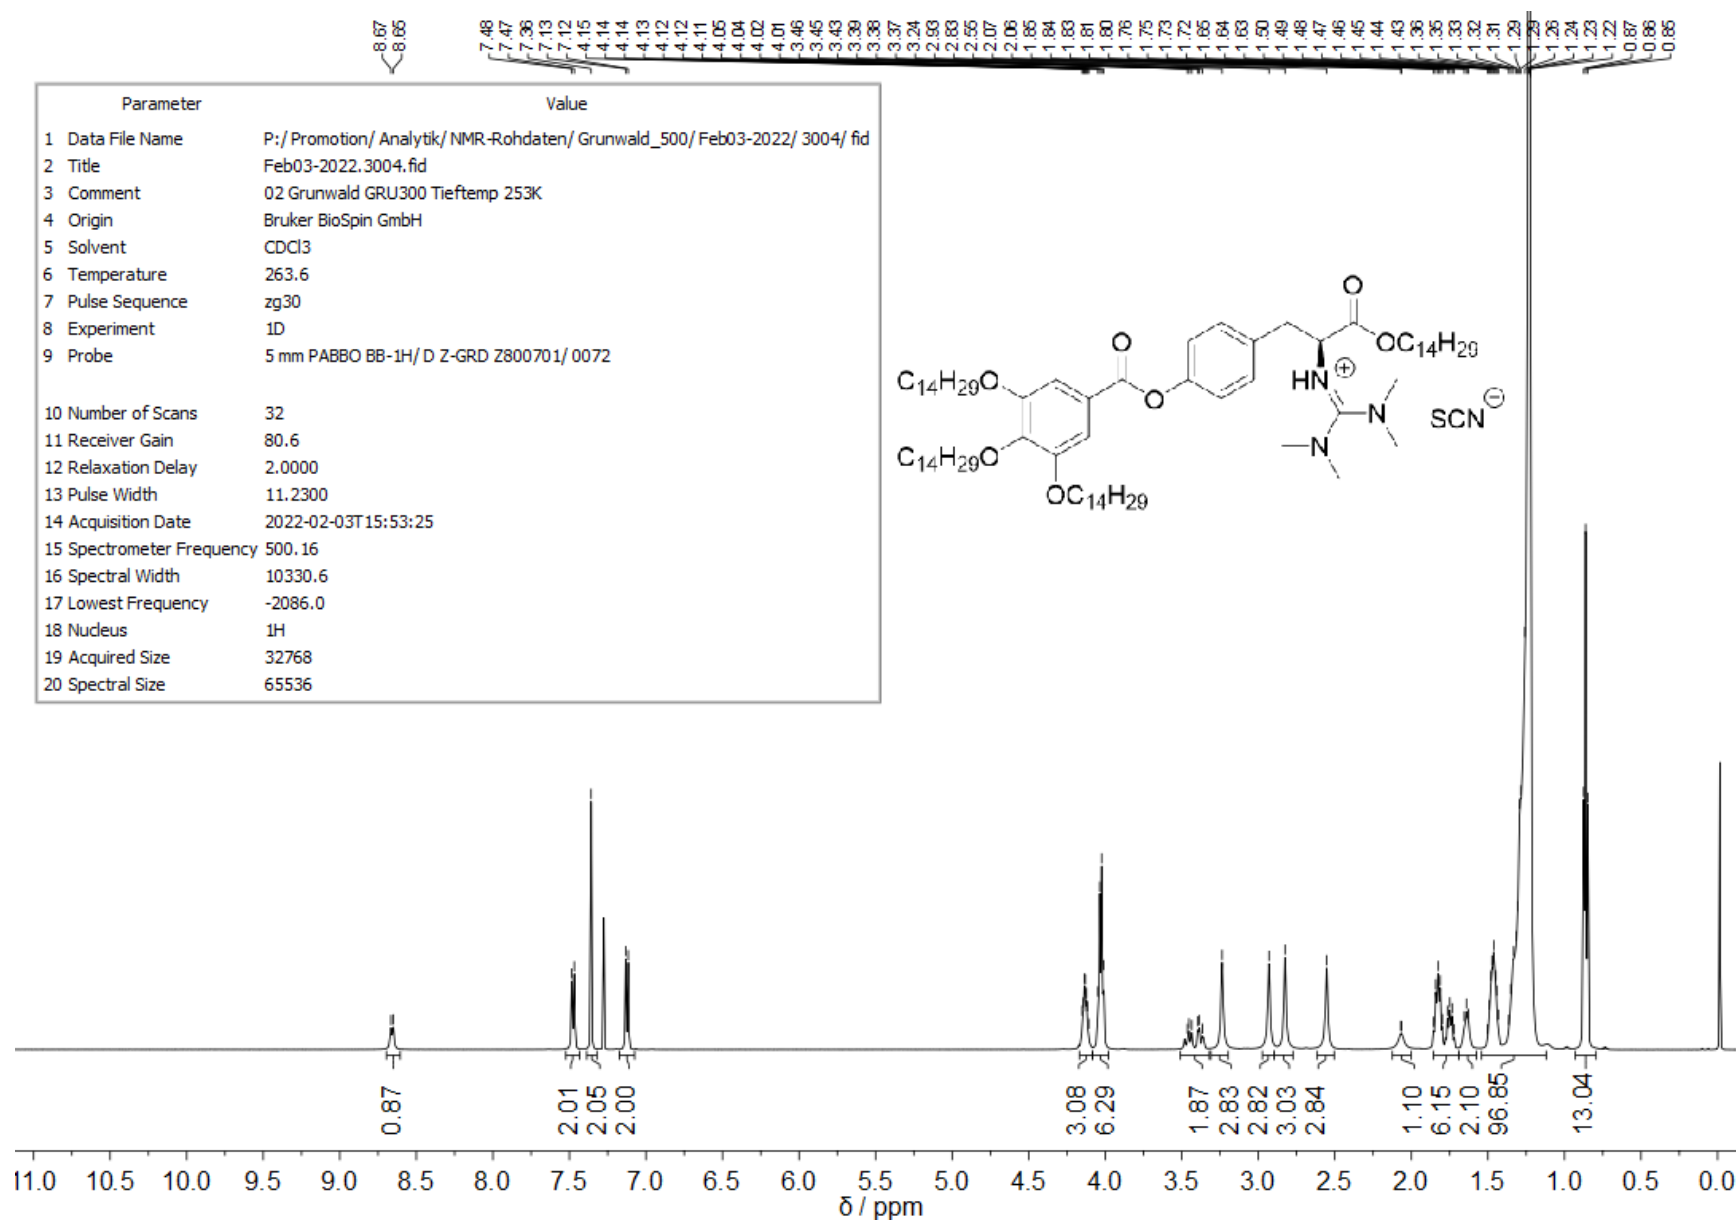

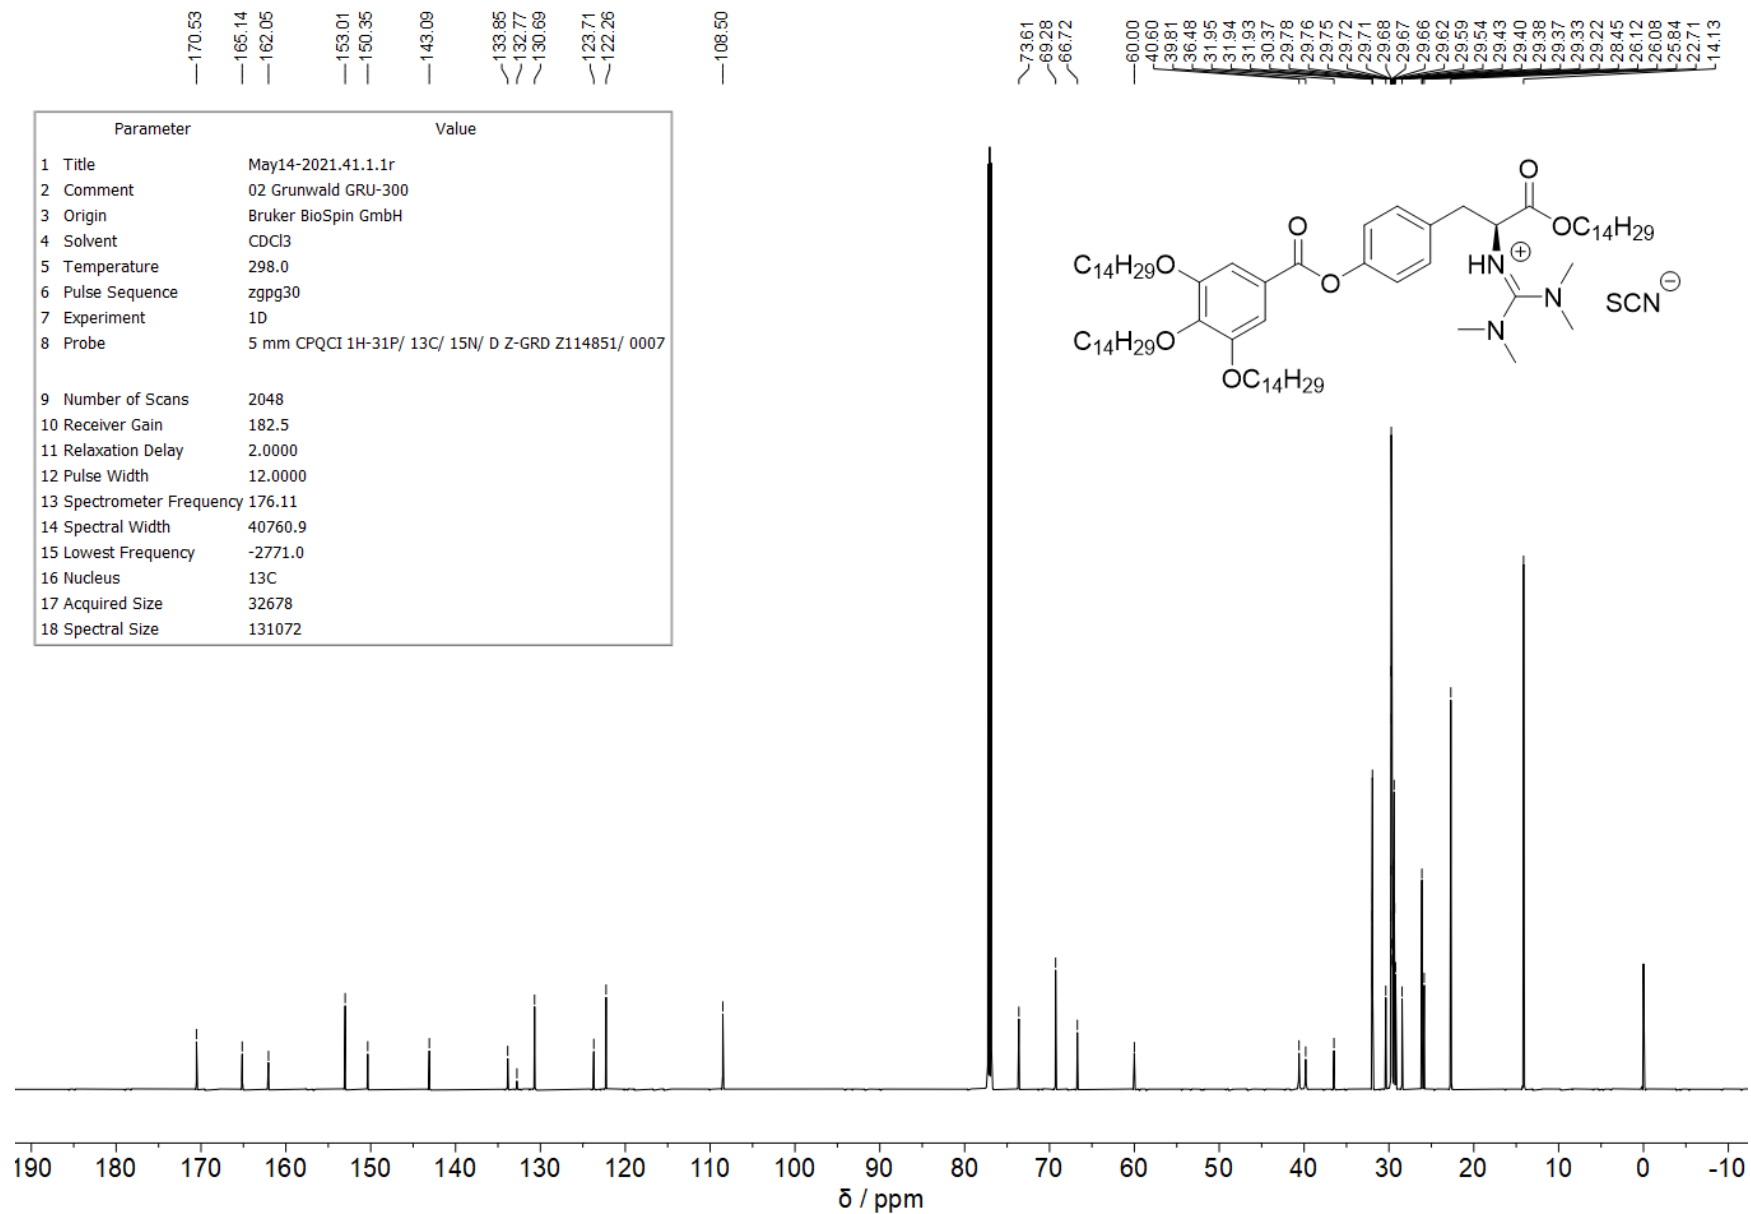

## 3,4,5-C14TyrC14NO3

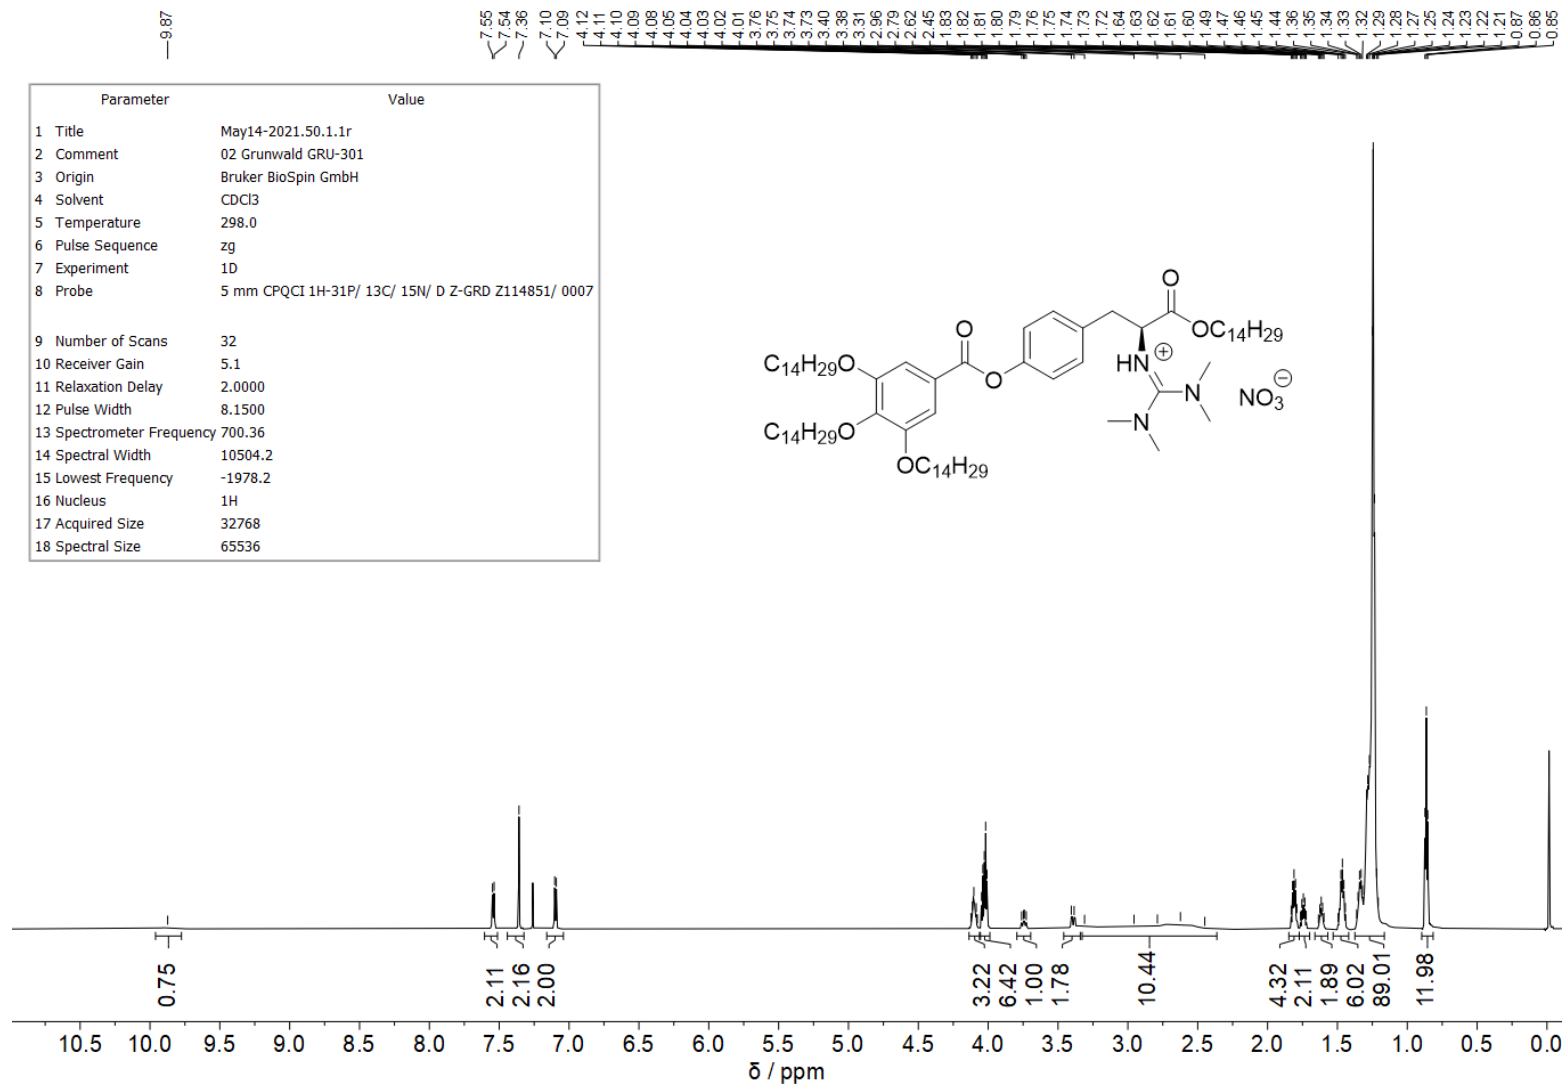

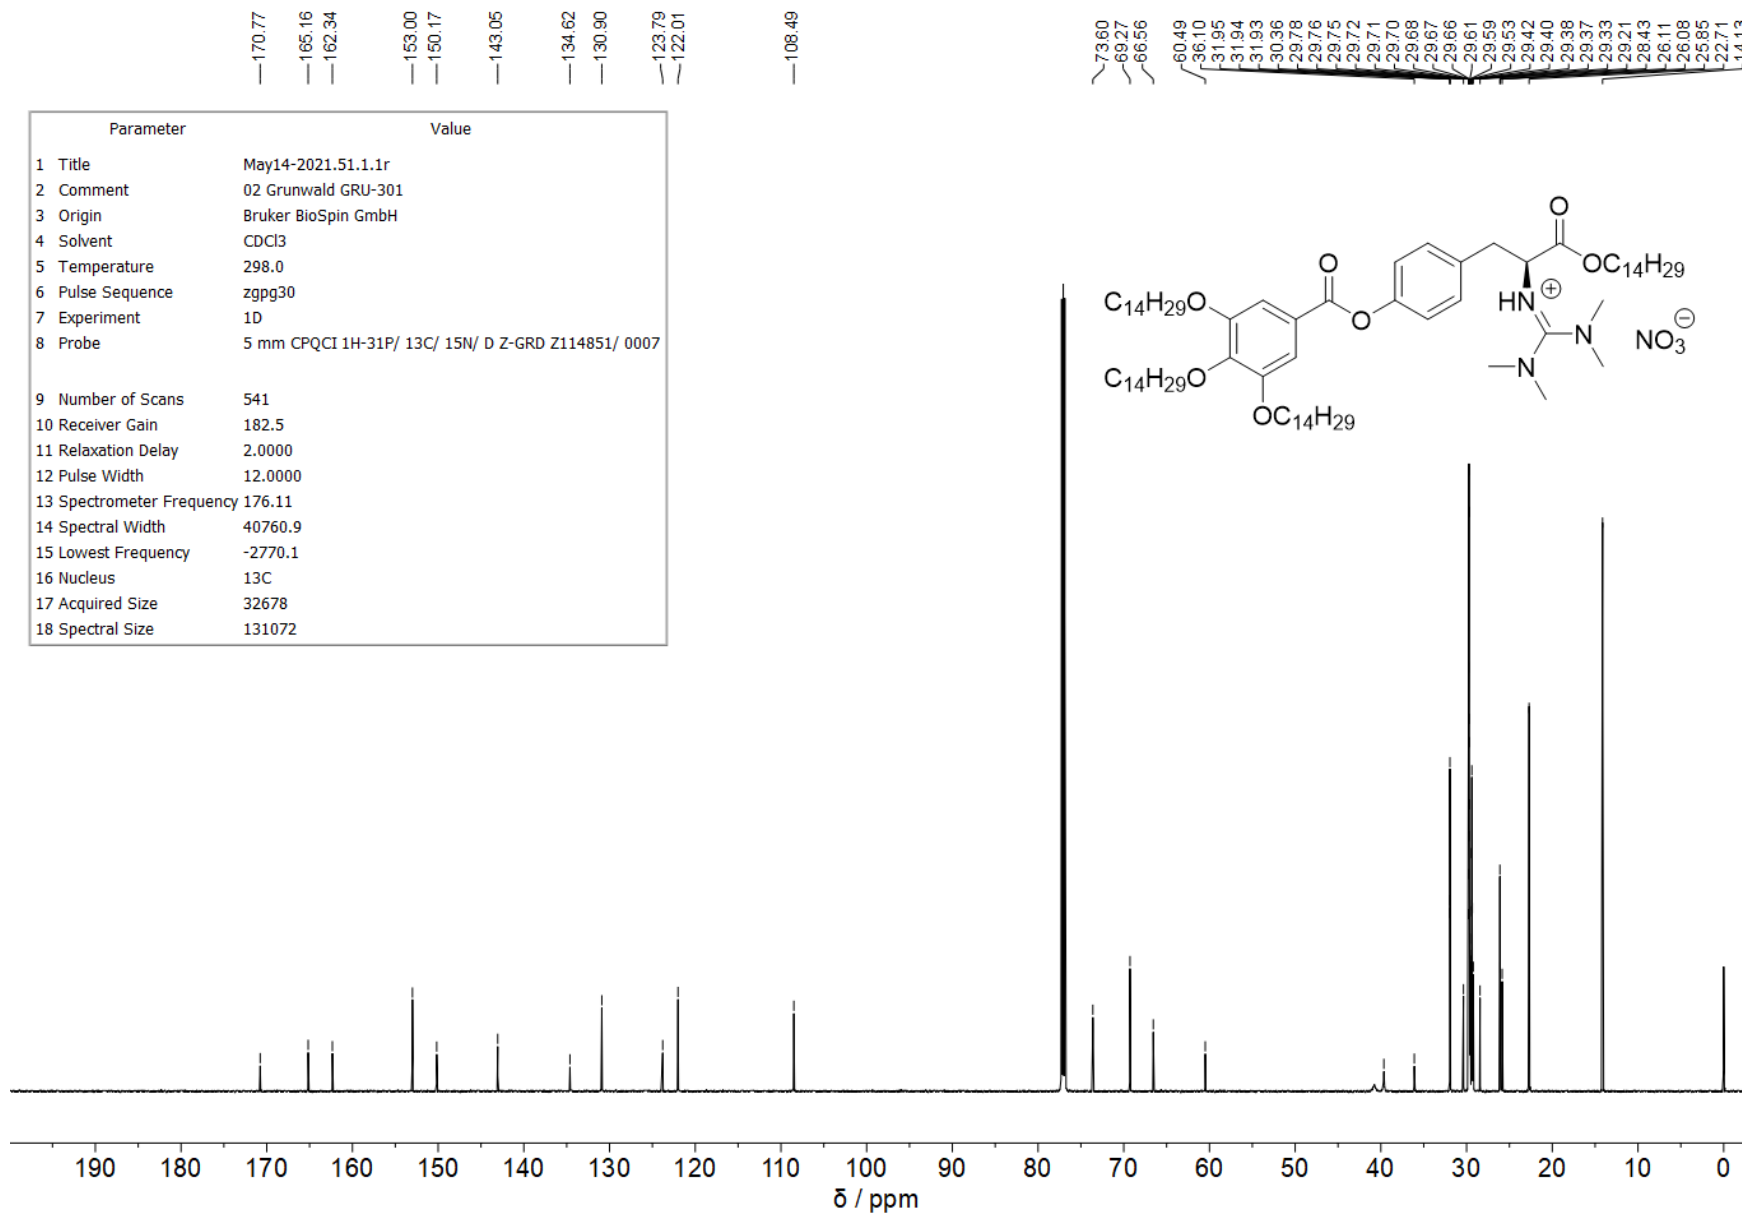

## BzTyrC14Br

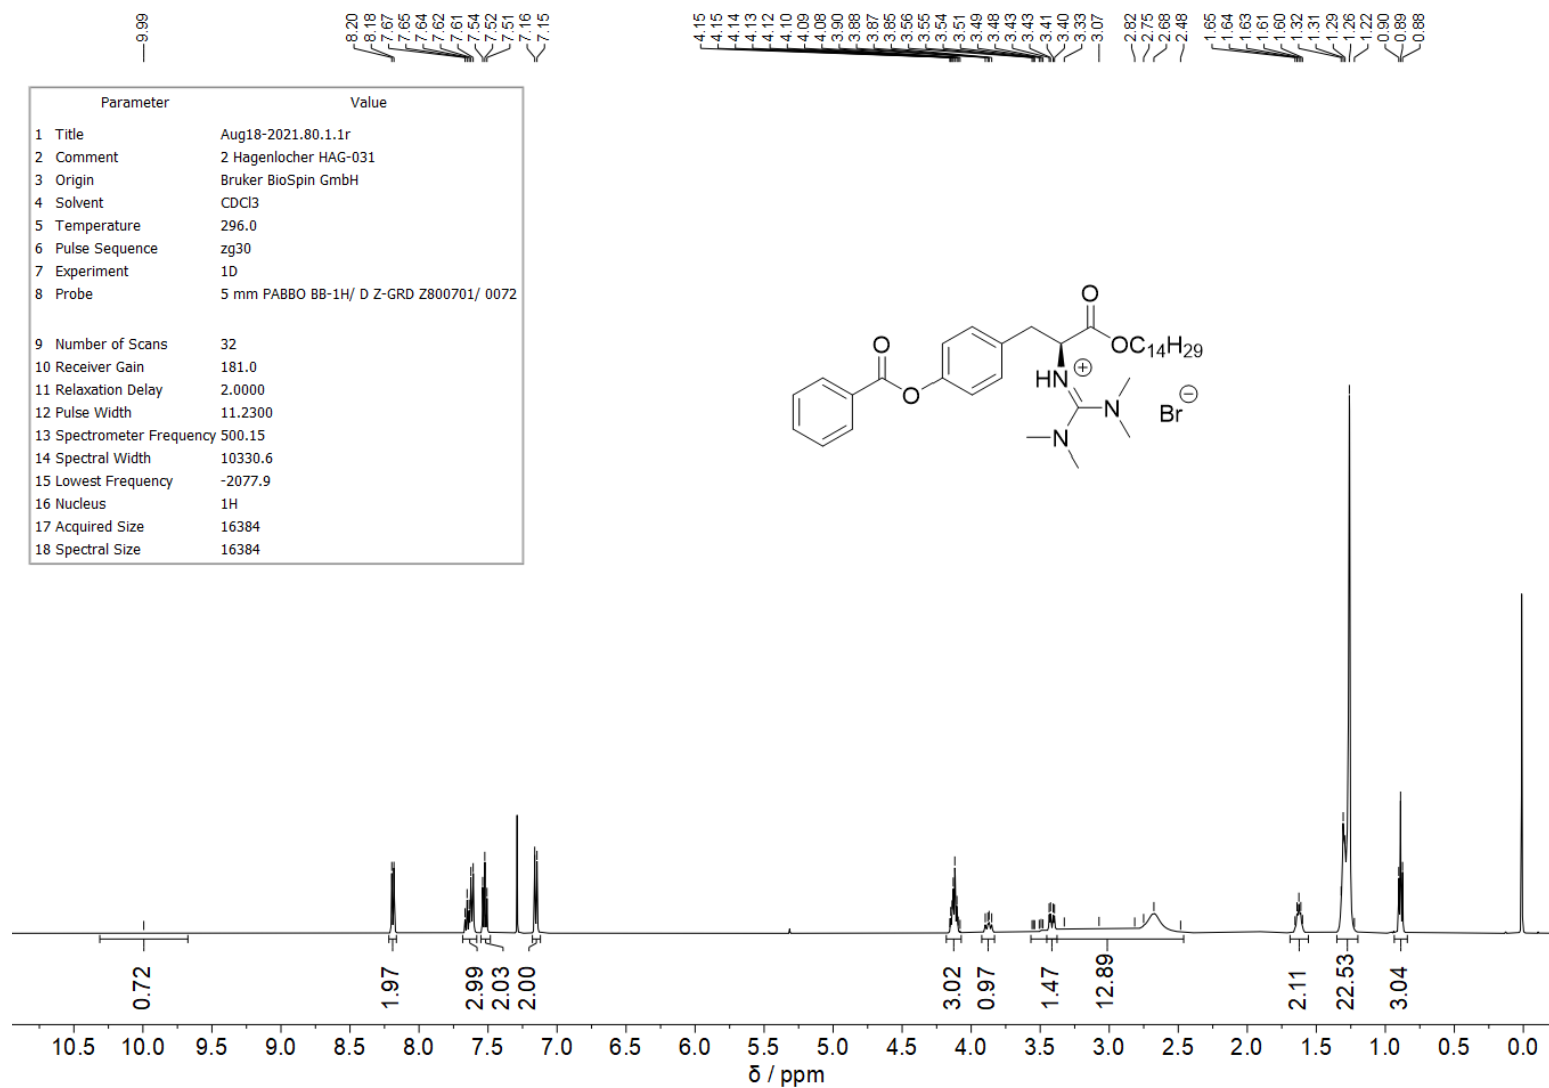



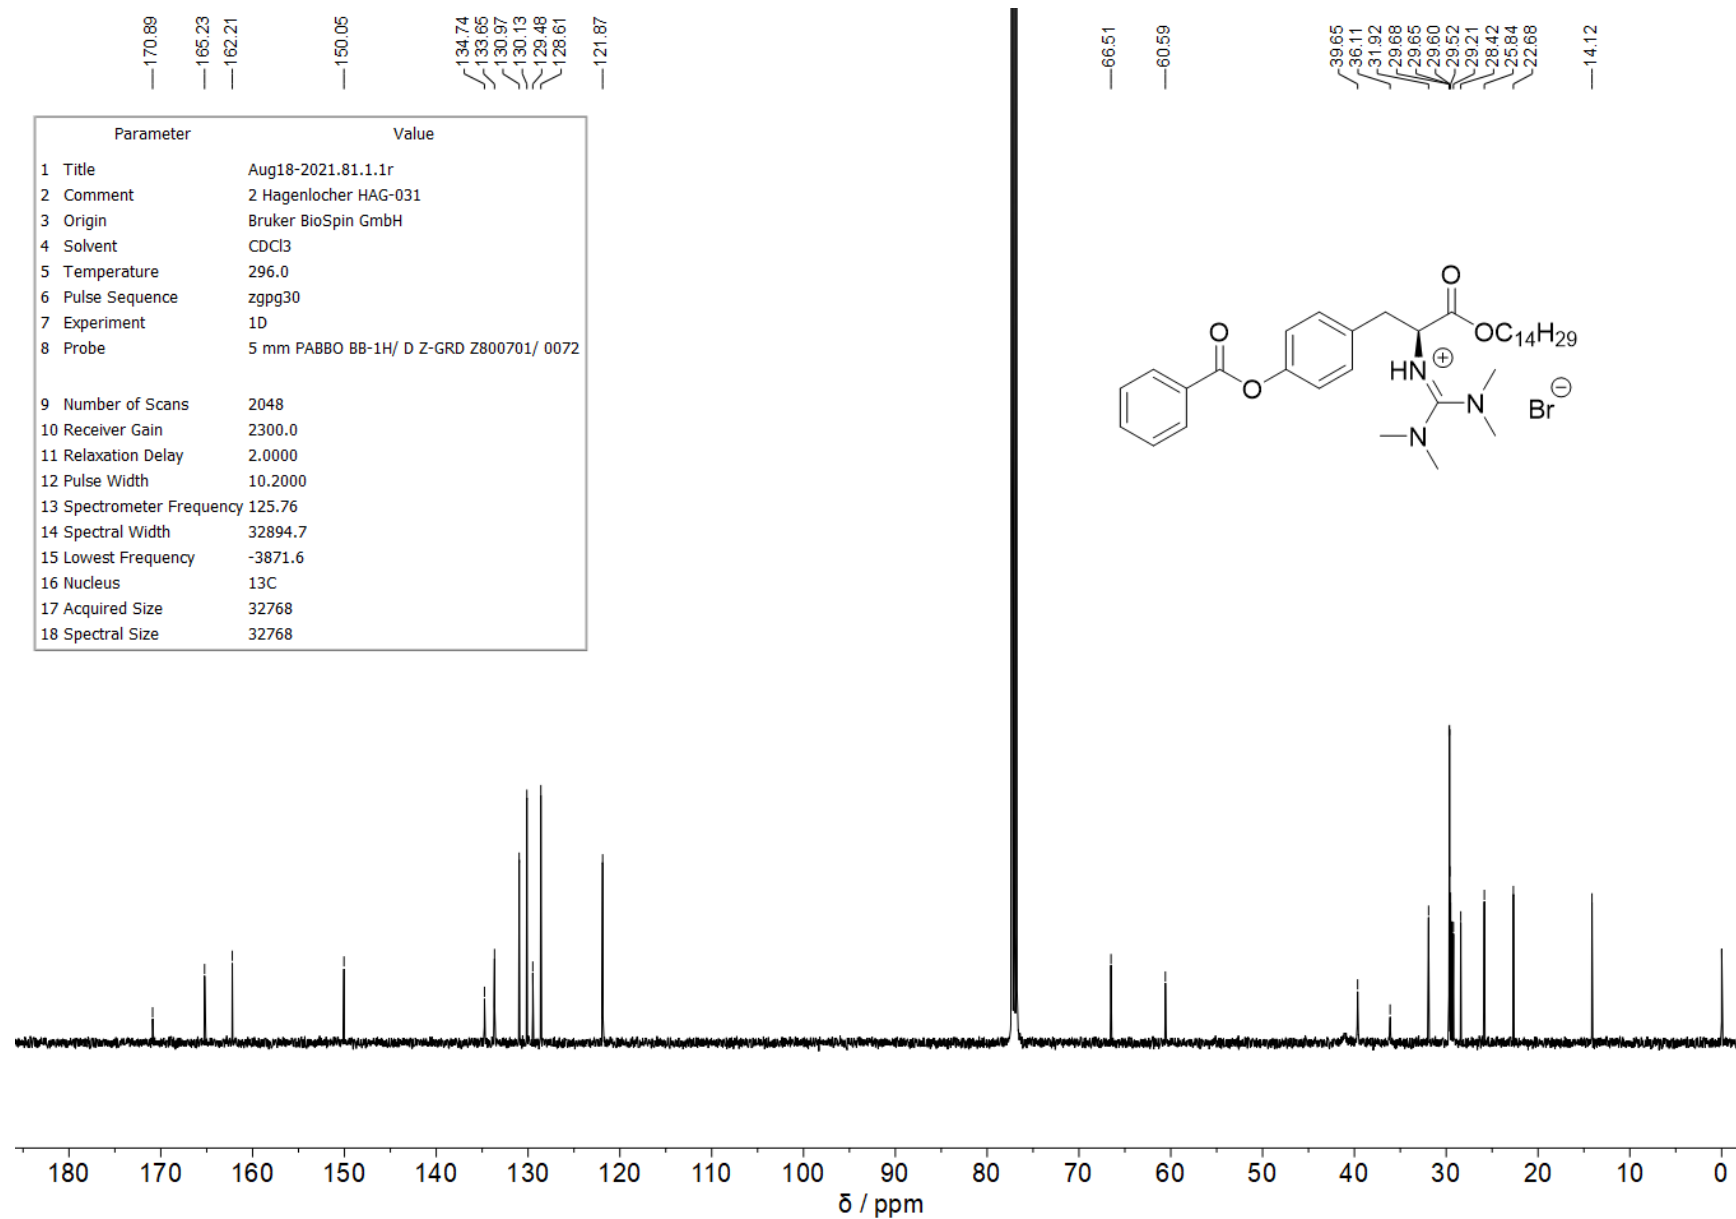

## BzTyrC14I

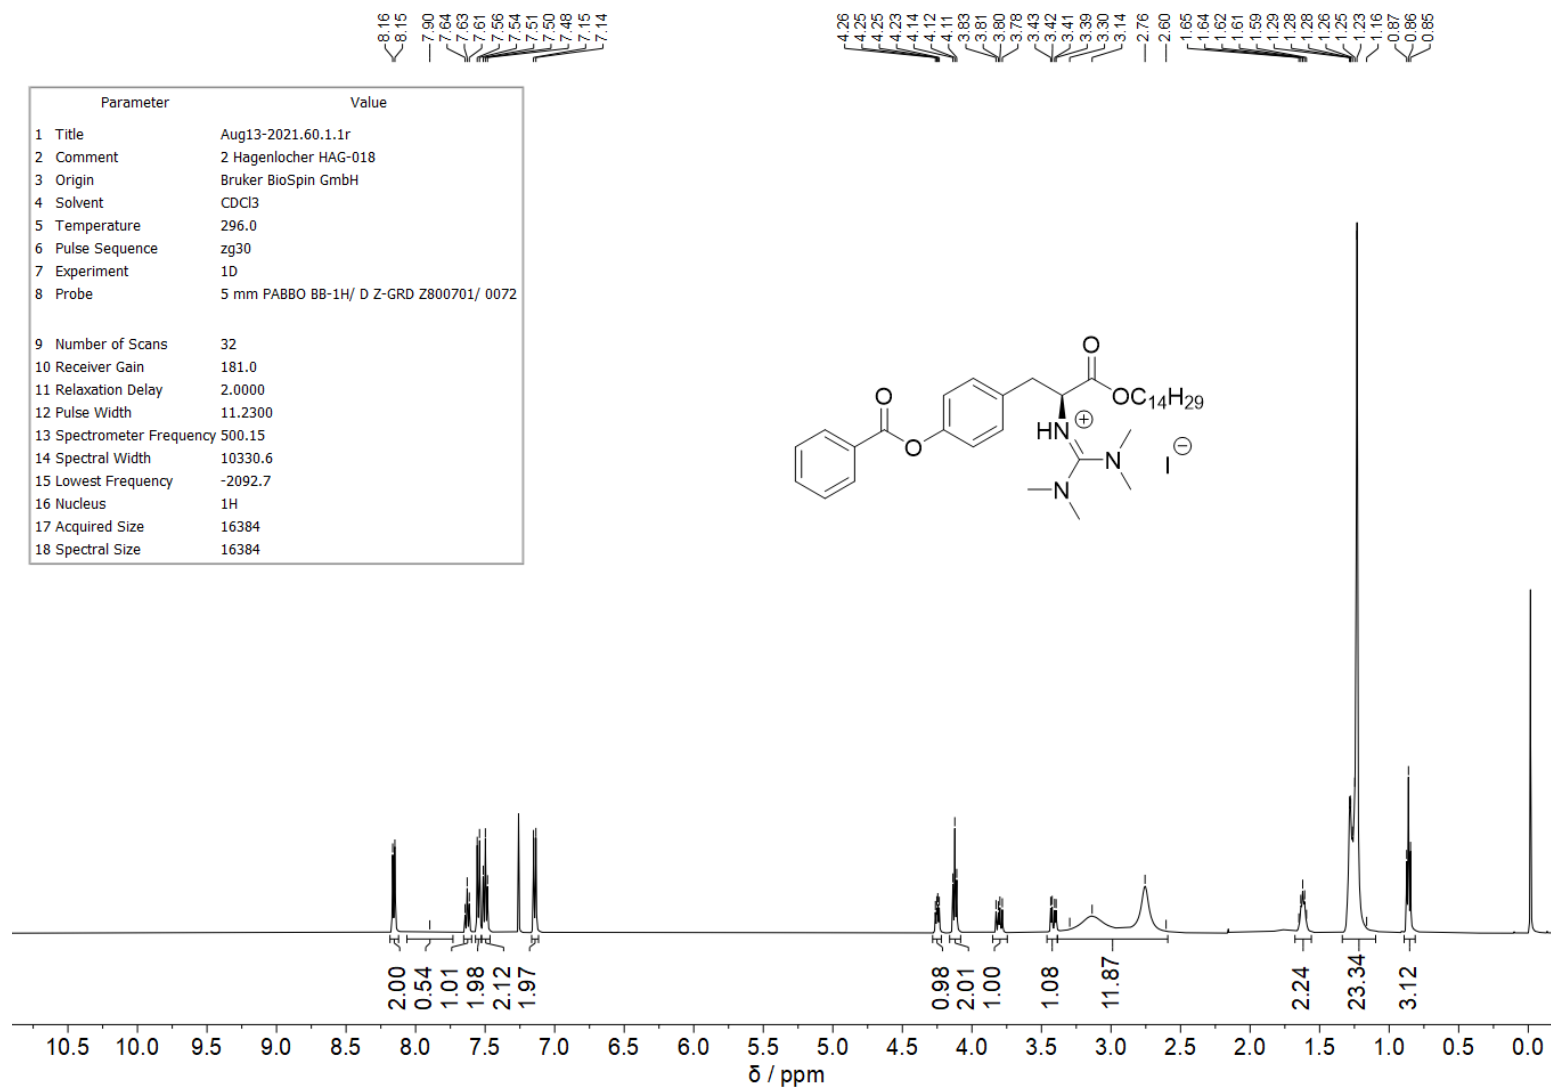

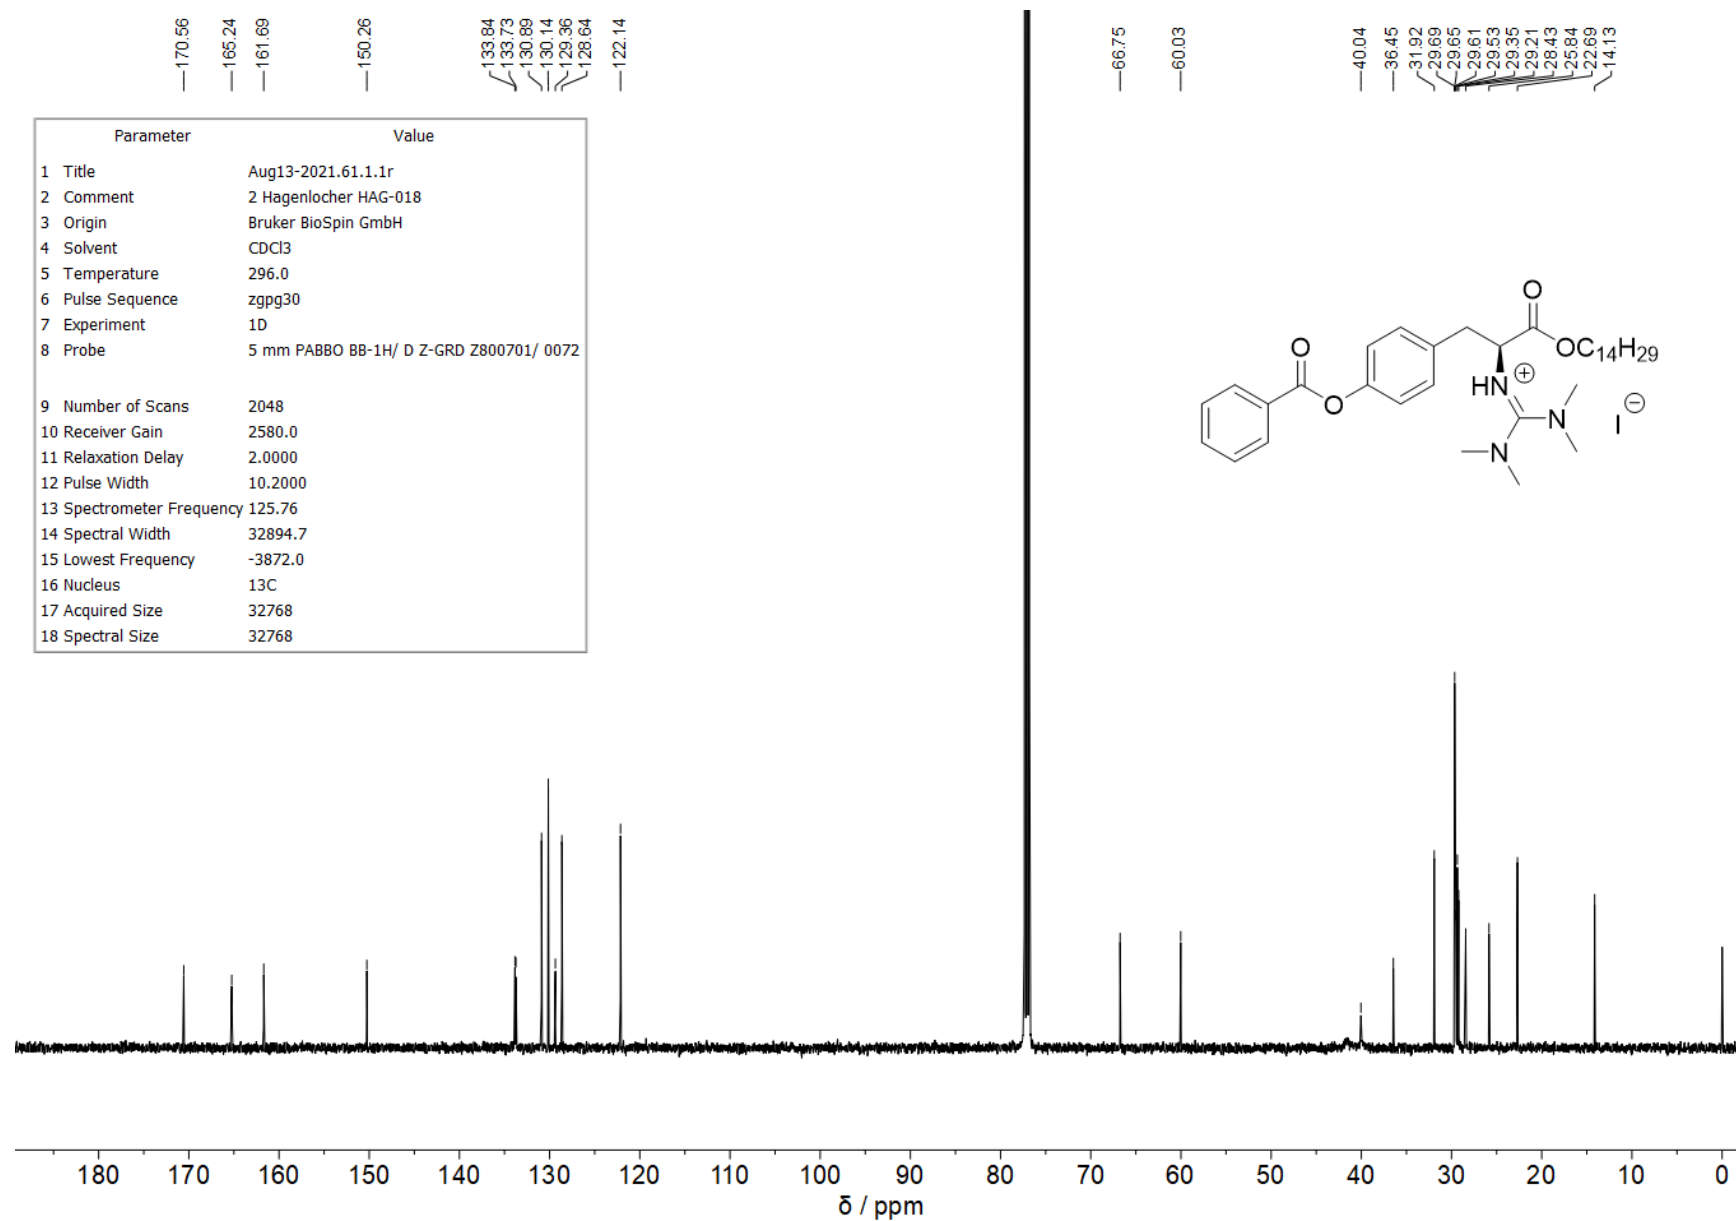

BzTyrC14PF6

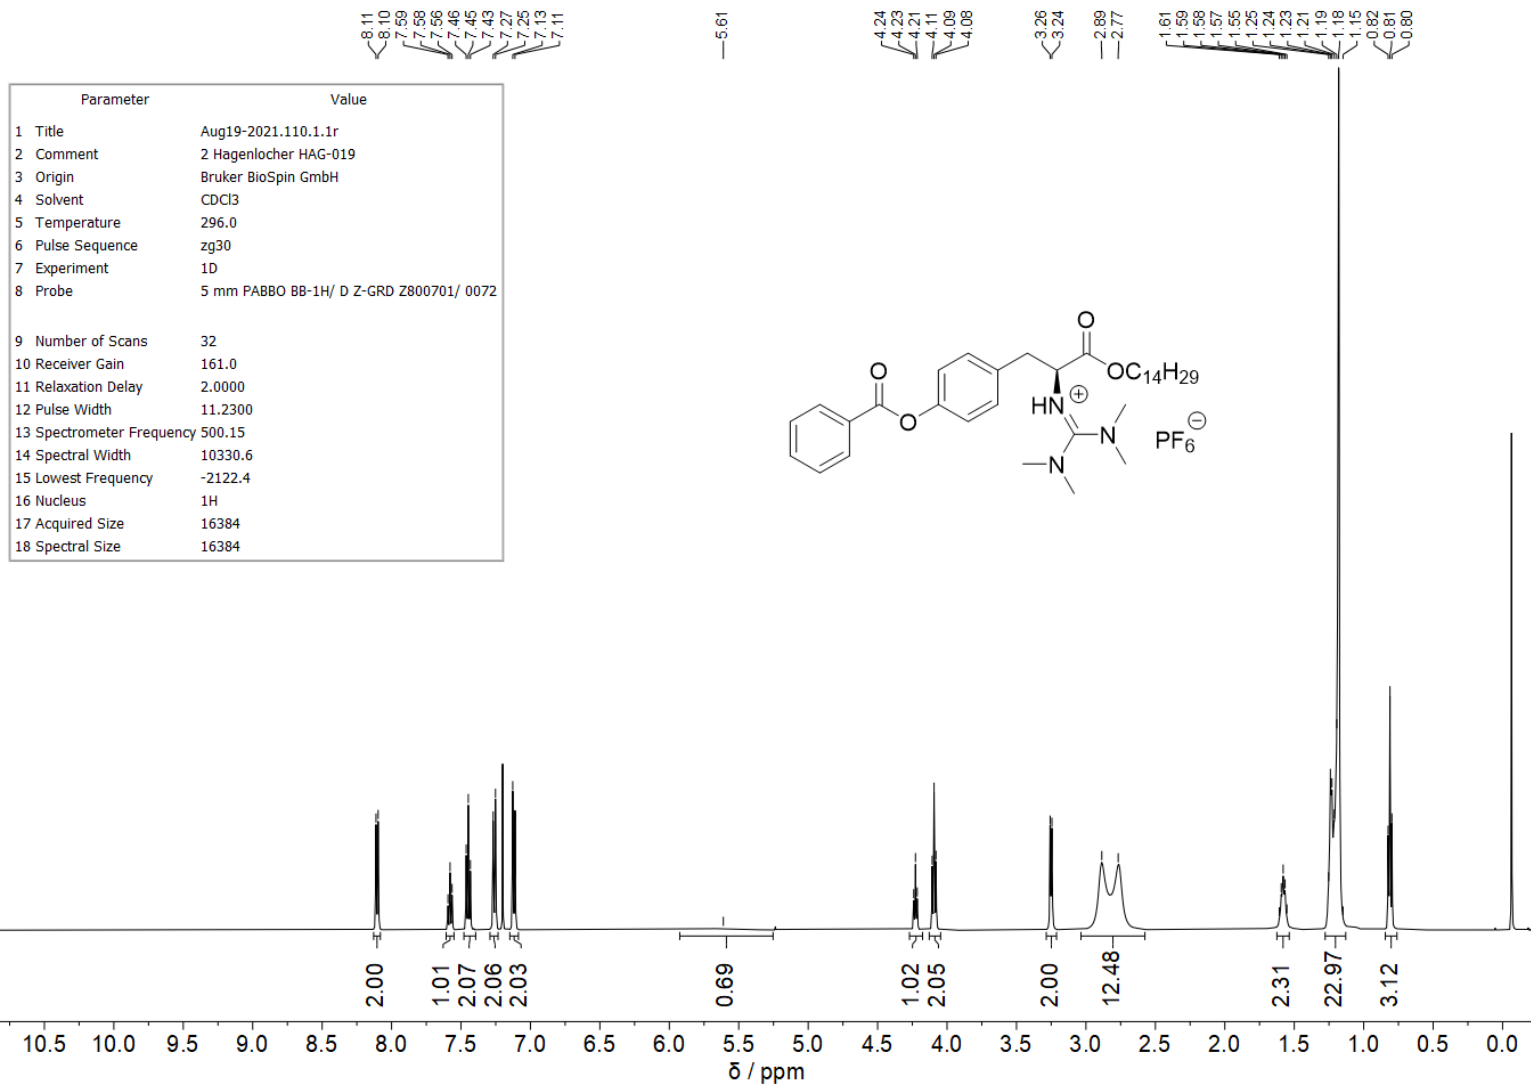

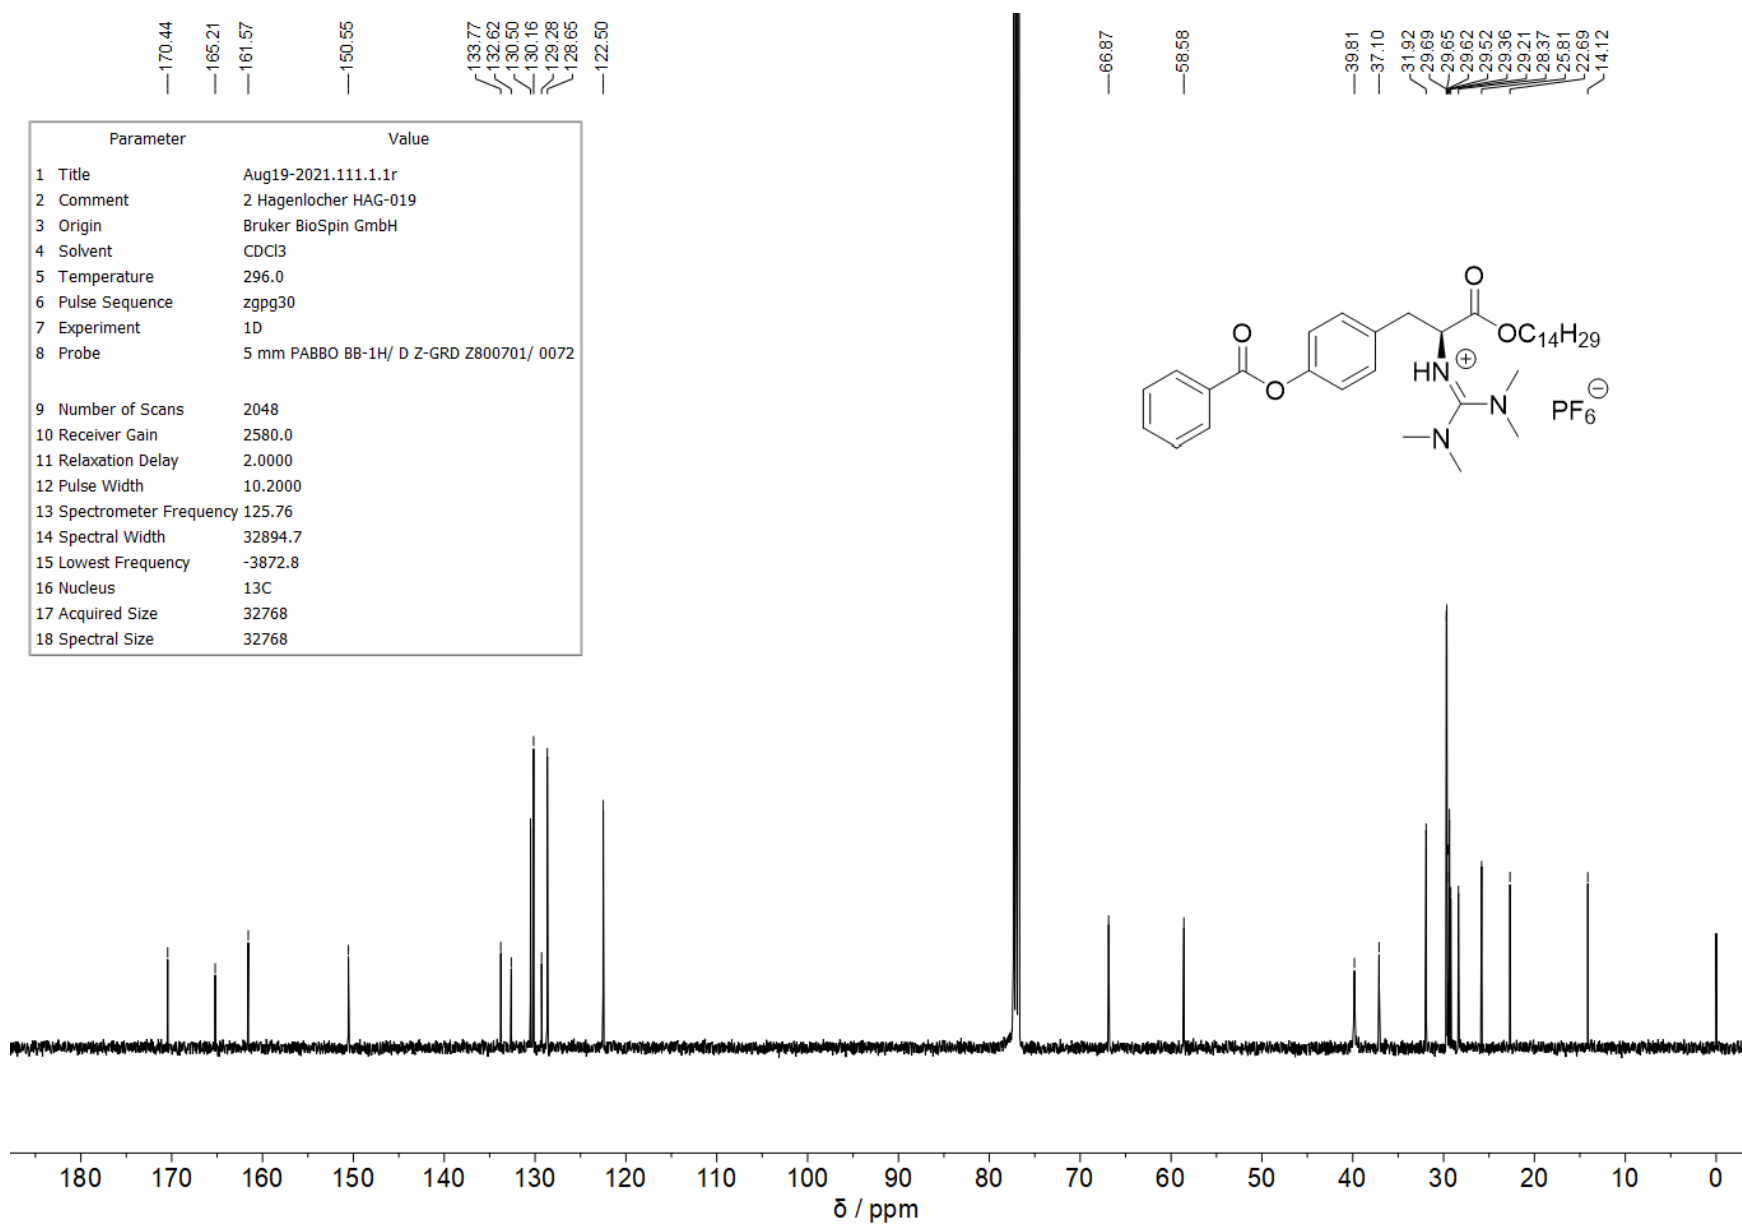

| Parameter                 | Value                                   |
|---------------------------|-----------------------------------------|
| 1 Title                   | Aug19-2021.111.1.1r                     |
| 2 Comment                 | 2 Hagenlocher HAG-019                   |
| 3 Origin                  | Bruker BioSpin GmbH                     |
| 4 Solvent                 | CDCl3                                   |
| 5 Temperature             | 296.0                                   |
| 6 Pulse Sequence          | zgpg30                                  |
| 7 Experiment              | 1D                                      |
| 8 Probe                   | 5 mm PABBO BB-1H/ D Z-GRD Z800701/ 0072 |
| 9 Number of Scans         | 2048                                    |
| 10 Receiver Gain          | 2580.0                                  |
| 11 Relaxation Delay       | 2.0000                                  |
| 12 Pulse Width            | 10.2000                                 |
| 13 Spectrometer Frequency | 125.76                                  |
| 14 Spectral Width         | 32894.7                                 |
| 15 Lowest Frequency       | -3872.8                                 |
| 16 Nucleus                | 13C                                     |
| 17 Acquired Size          | 32768                                   |
| 18 Spectral Size          | 32768                                   |

| Parameter                 | Value                                        |
|---------------------------|----------------------------------------------|
| 1 Title                   | Oct12-2021.120.fid                           |
| 2 Comment                 | 02 Hagenlocher HAG019                        |
| 3 Origin                  | Bruker BioSpin GmbH                          |
| 4 Solvent                 | CDCl3                                        |
| 5 Temperature             | 298.0                                        |
| 6 Pulse Sequence          | zgfgqn                                       |
| 7 Experiment              | 1D                                           |
| 8 Probe                   | 5 mm PABBO BB/ 19F-1H/ D Z-GRD Z108618/ 0806 |
| 9 Number of Scans         | 16                                           |
| 10 Receiver Gain          | 205.3                                        |
| 11 Relaxation Delay       | 1.0000                                       |
| 12 Pulse Width            | 14.6500                                      |
| 13 Spectrometer Frequency | 376.43                                       |
| 14 Spectral Width         | 89285.7                                      |
| 15 Lowest Frequency       | -82289.9                                     |
| 16 Nucleus                | 19F                                          |
| 17 Acquired Size          | 65536                                        |
| 18 Spectral Size          | 131072                                       |

71.47  
73.36

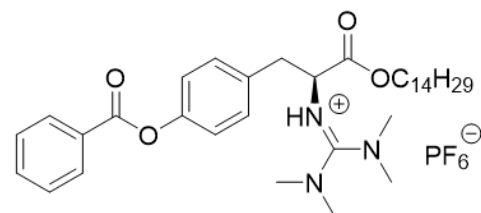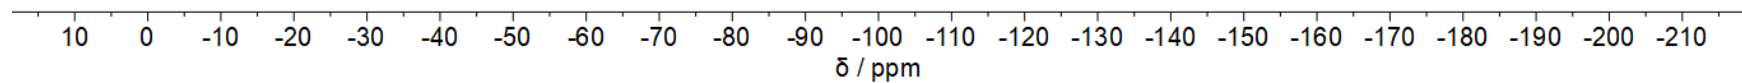

BzTyrC14BF4

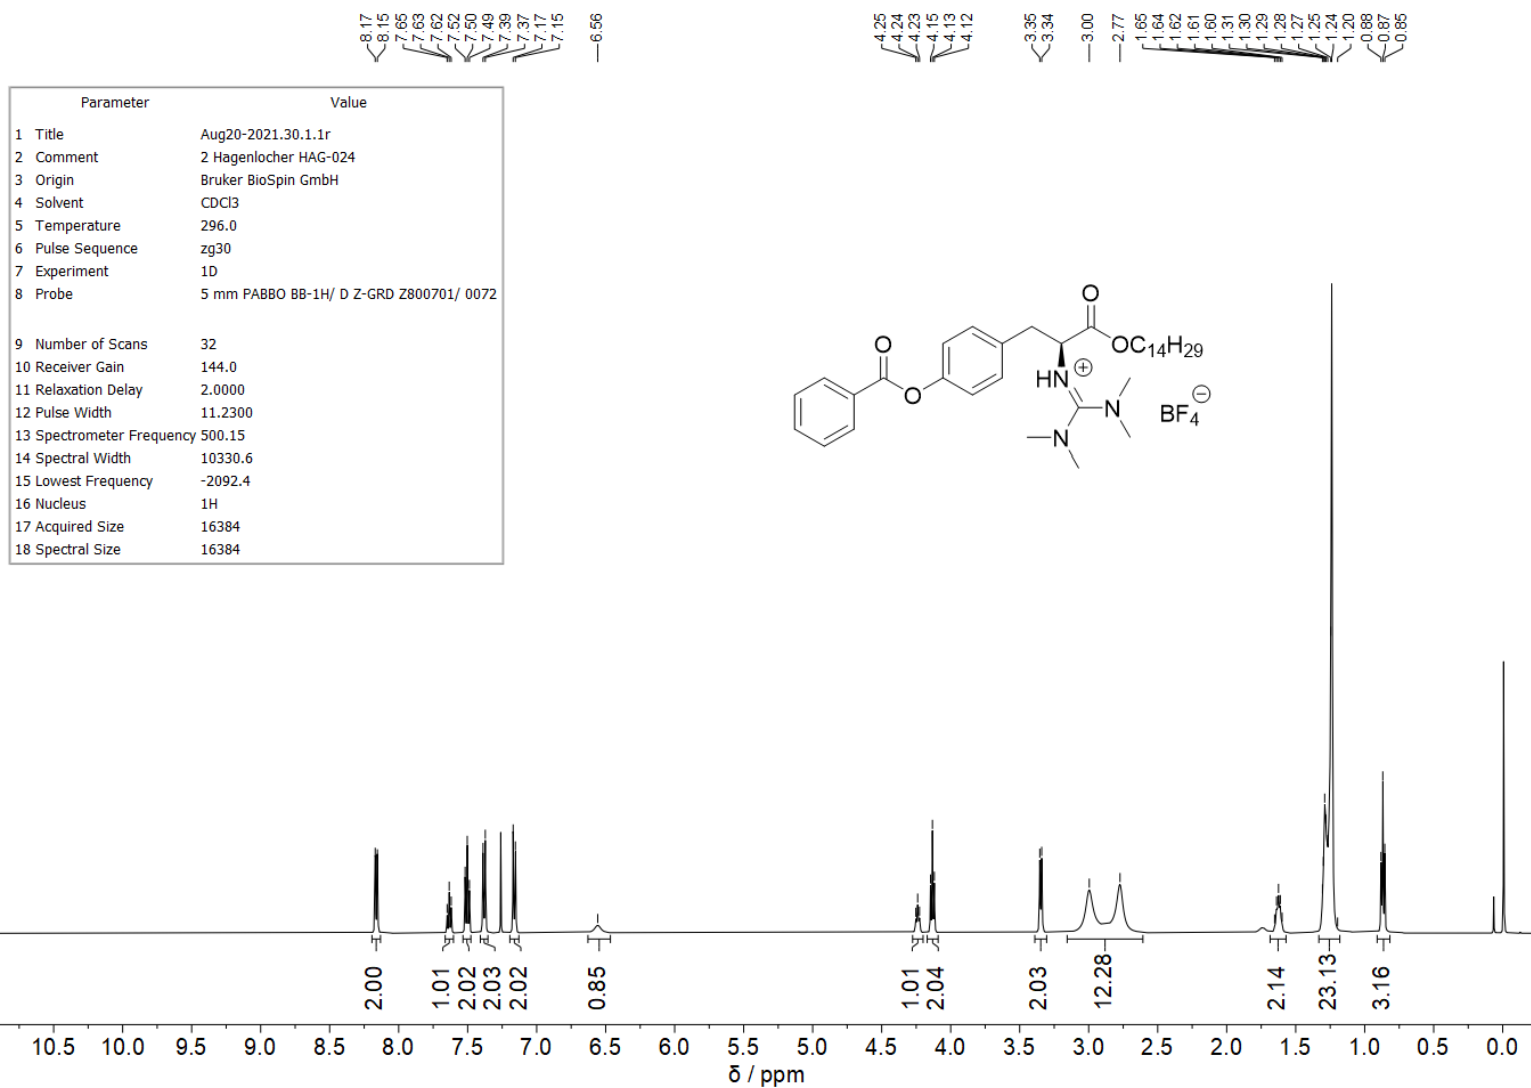

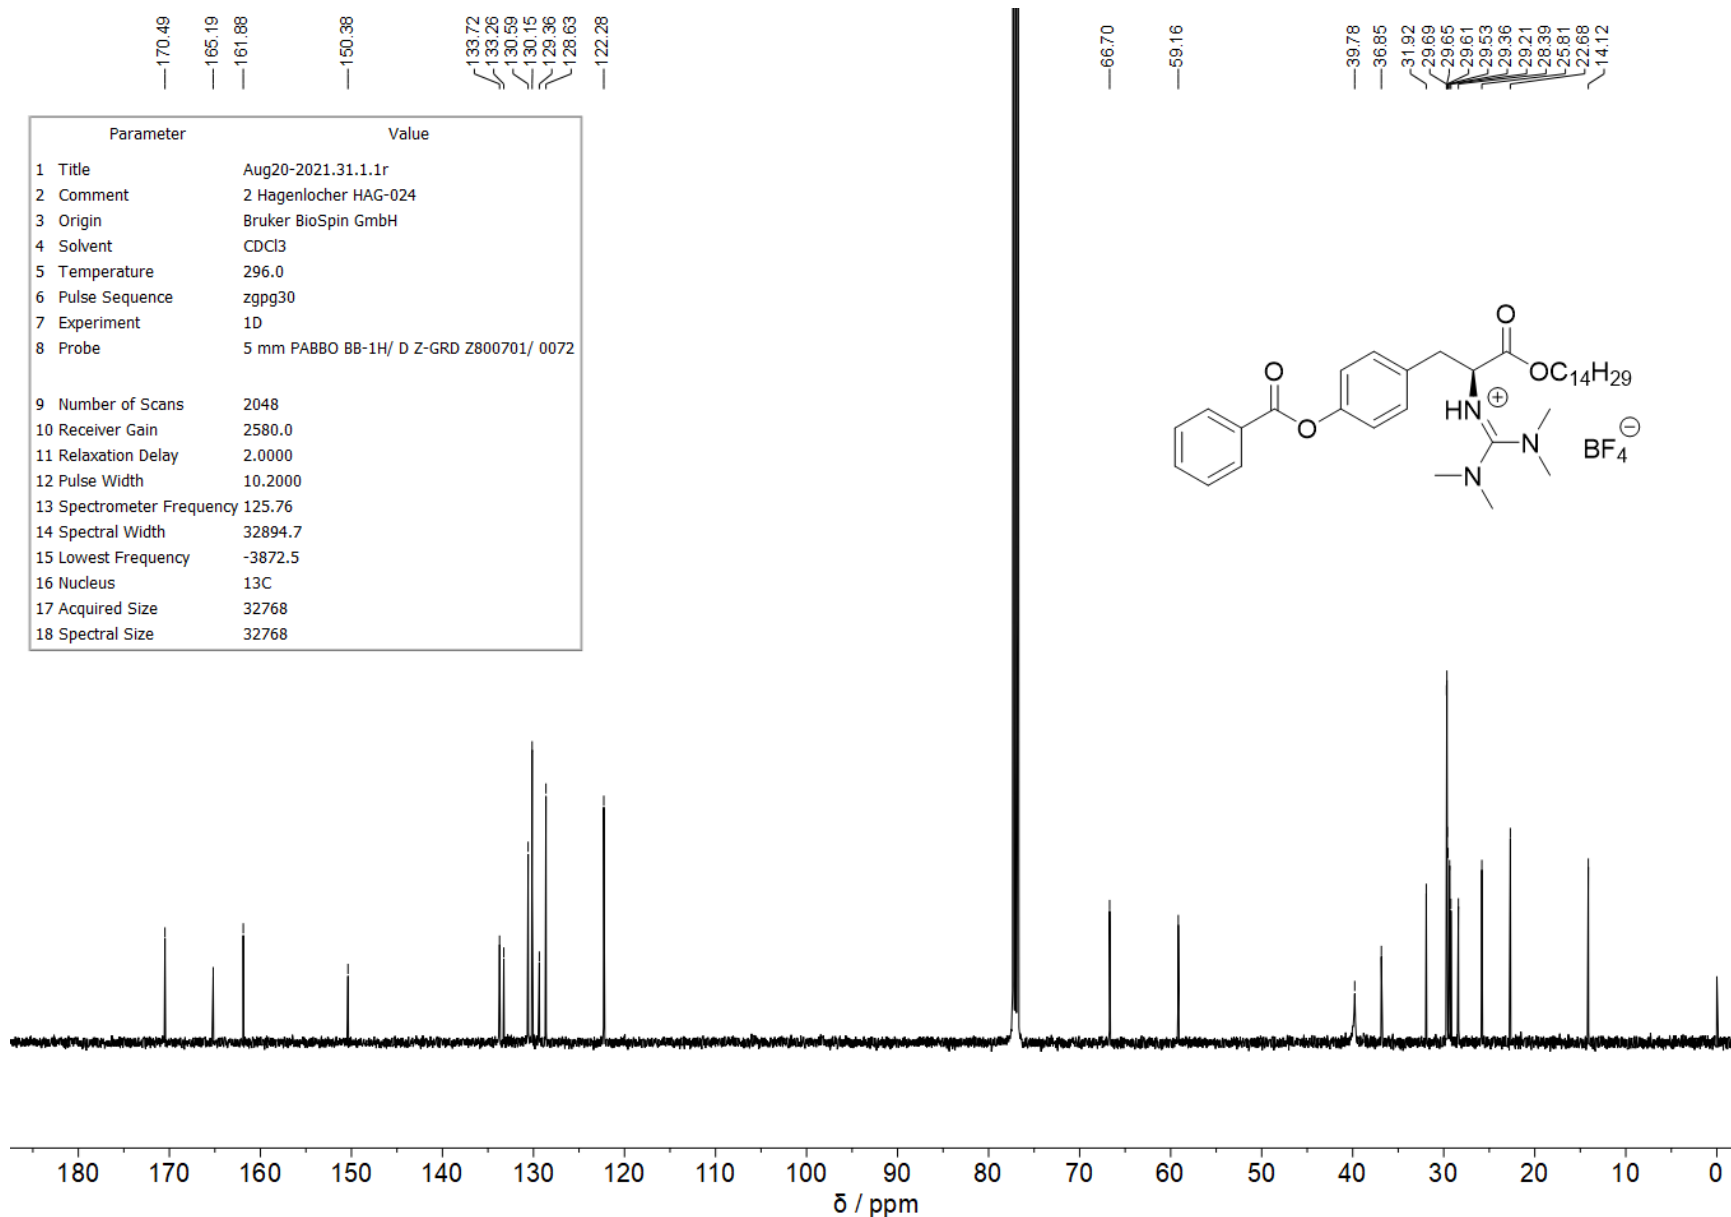



| Parameter                 | Value                                        |
|---------------------------|----------------------------------------------|
| 1 Title                   | Oct12-2021.140.fid                           |
| 2 Comment                 | 02 Hagenlocher HAG024                        |
| 3 Origin                  | Bruker BioSpin GmbH                          |
| 4 Solvent                 | CDCl3                                        |
| 5 Temperature             | 298.0                                        |
| 6 Pulse Sequence          | zgfgqn                                       |
| 7 Experiment              | 1D                                           |
| 8 Probe                   | 5 mm PABBO BB/ 19F-1H/ D Z-GRD Z108618/ 0806 |
| 9 Number of Scans         | 16                                           |
| 10 Receiver Gain          | 205.3                                        |
| 11 Relaxation Delay       | 1.0000                                       |
| 12 Pulse Width            | 14.6500                                      |
| 13 Spectrometer Frequency | 376.43                                       |
| 14 Spectral Width         | 89285.7                                      |
| 15 Lowest Frequency       | -82289.9                                     |
| 16 Nucleus                | 19F                                          |
| 17 Acquired Size          | 65536                                        |
| 18 Spectral Size          | 131072                                       |

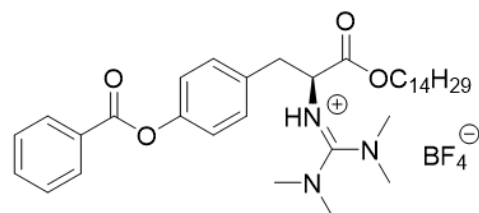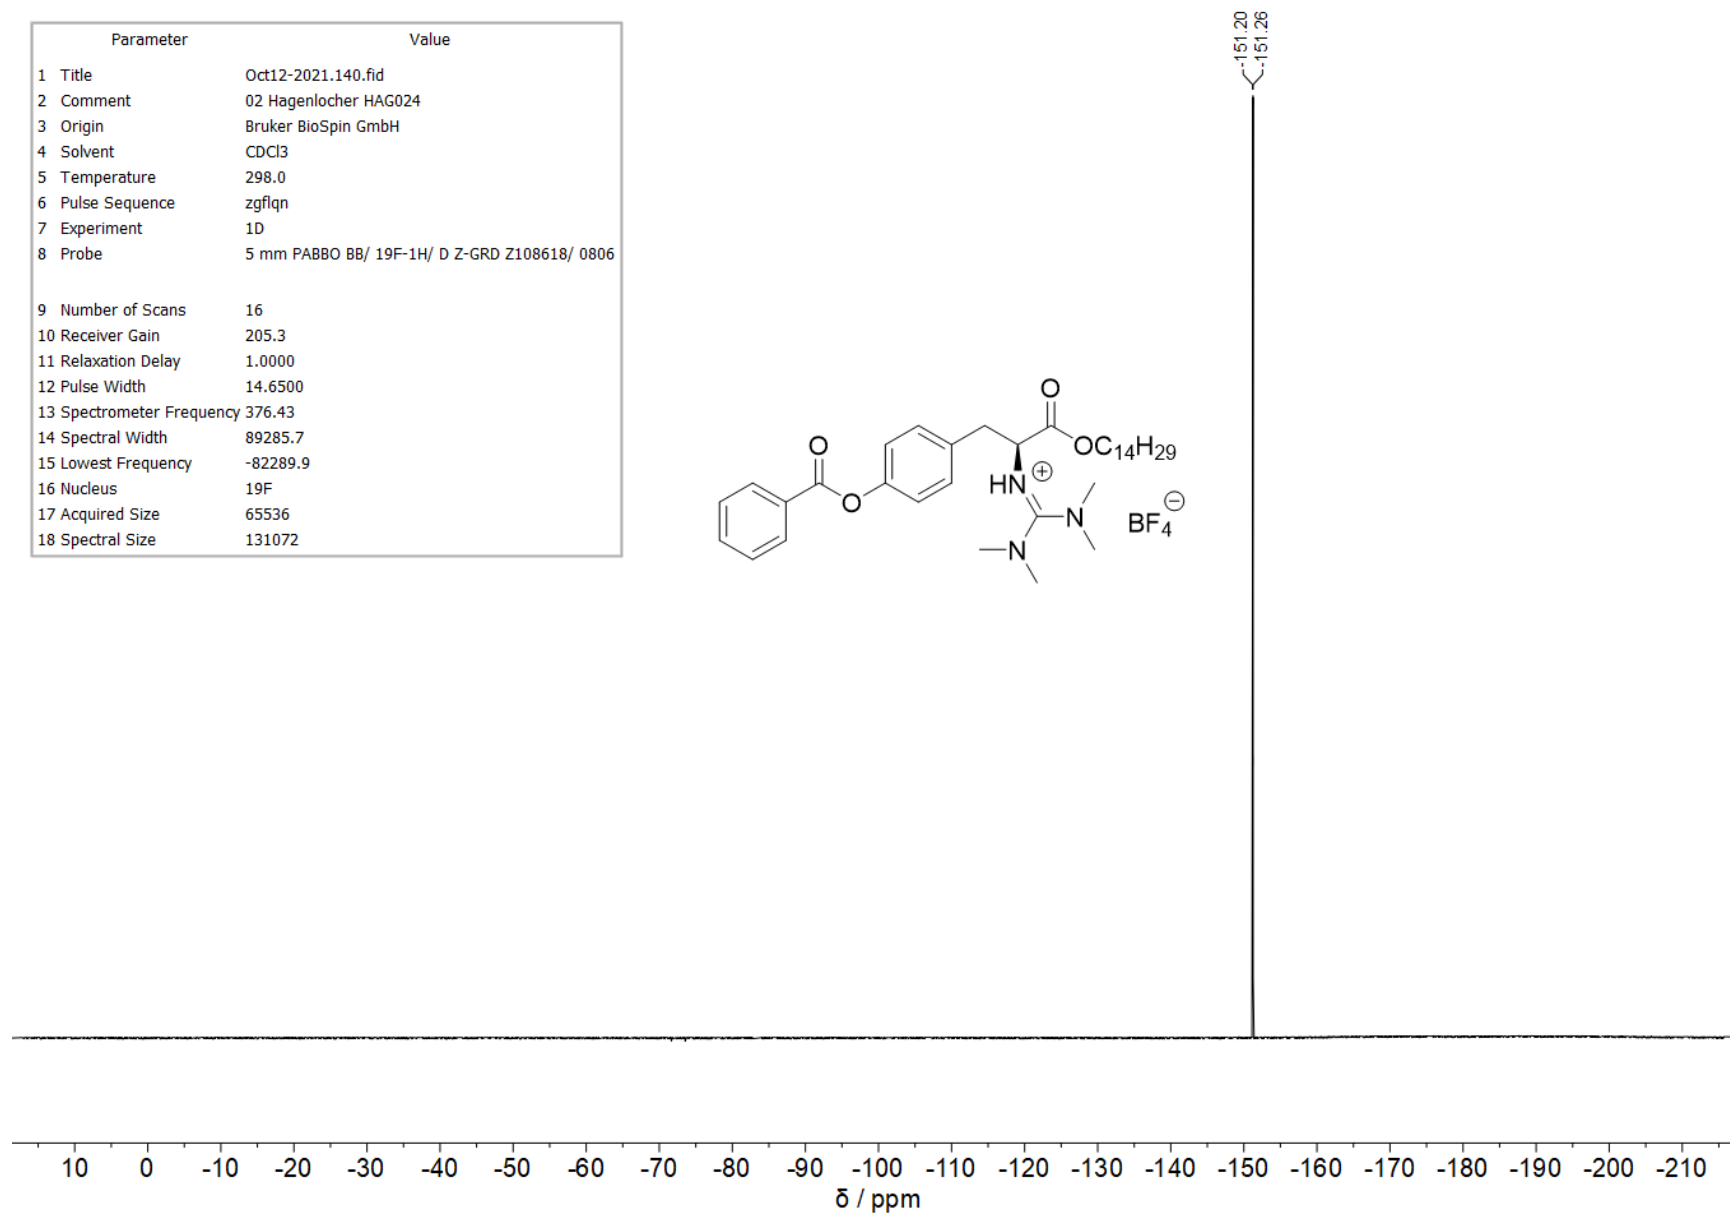

BzTyrC14NO3

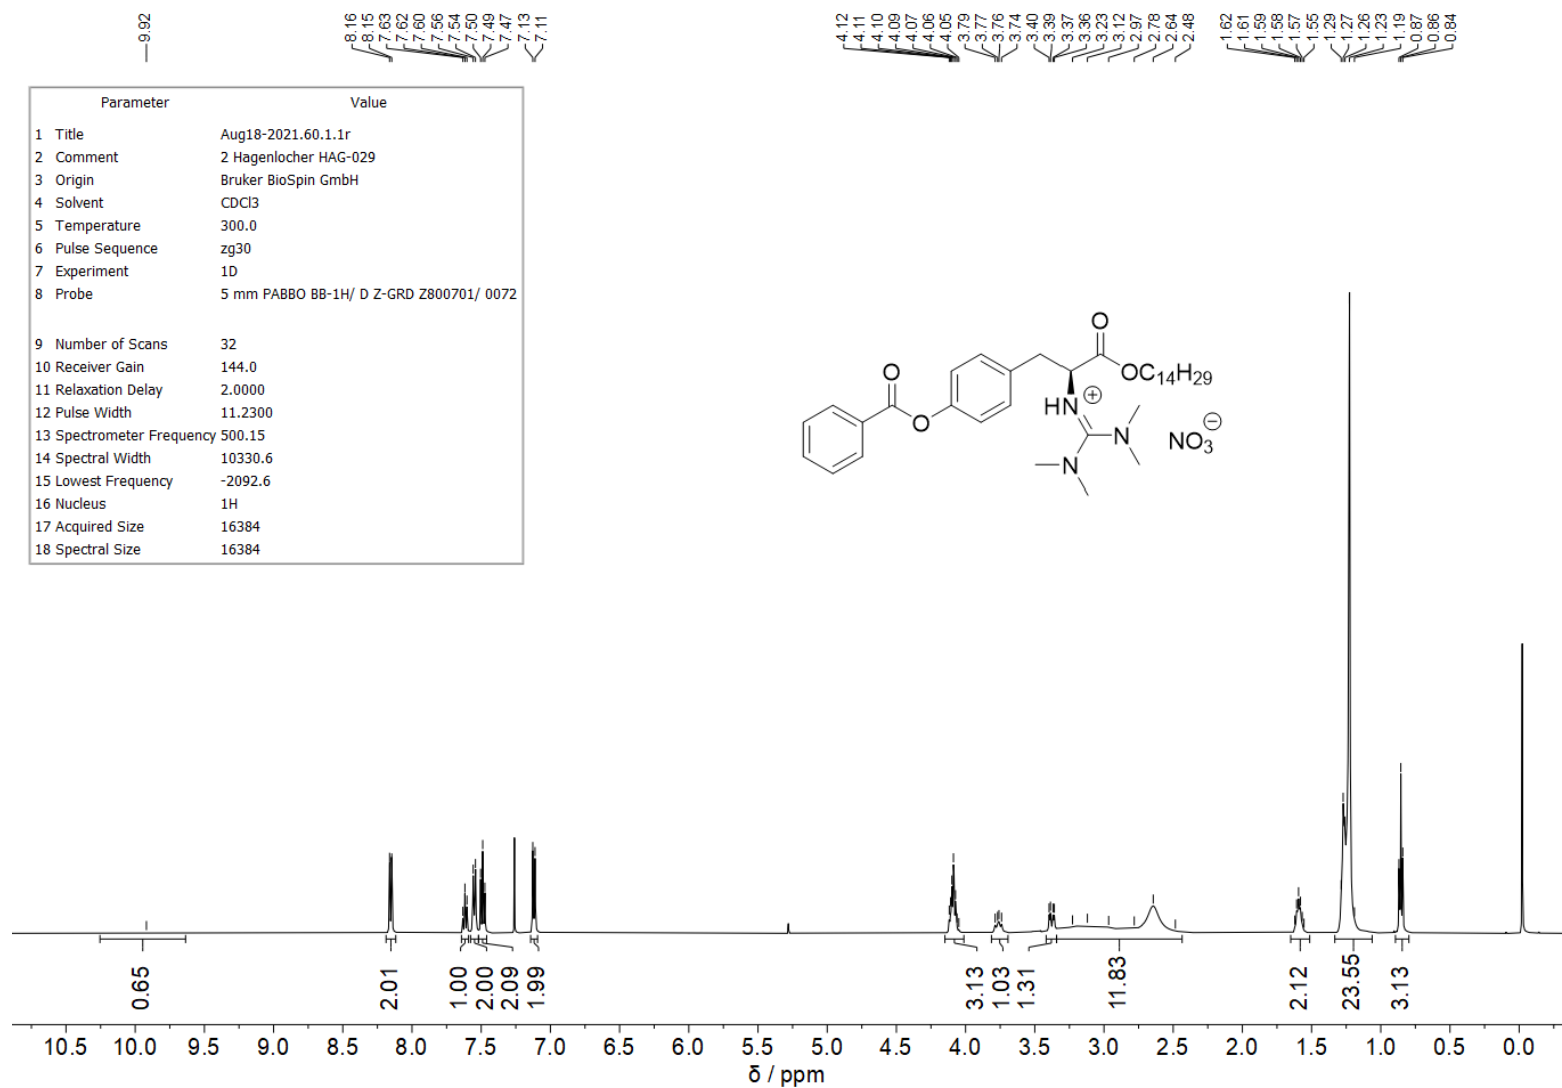

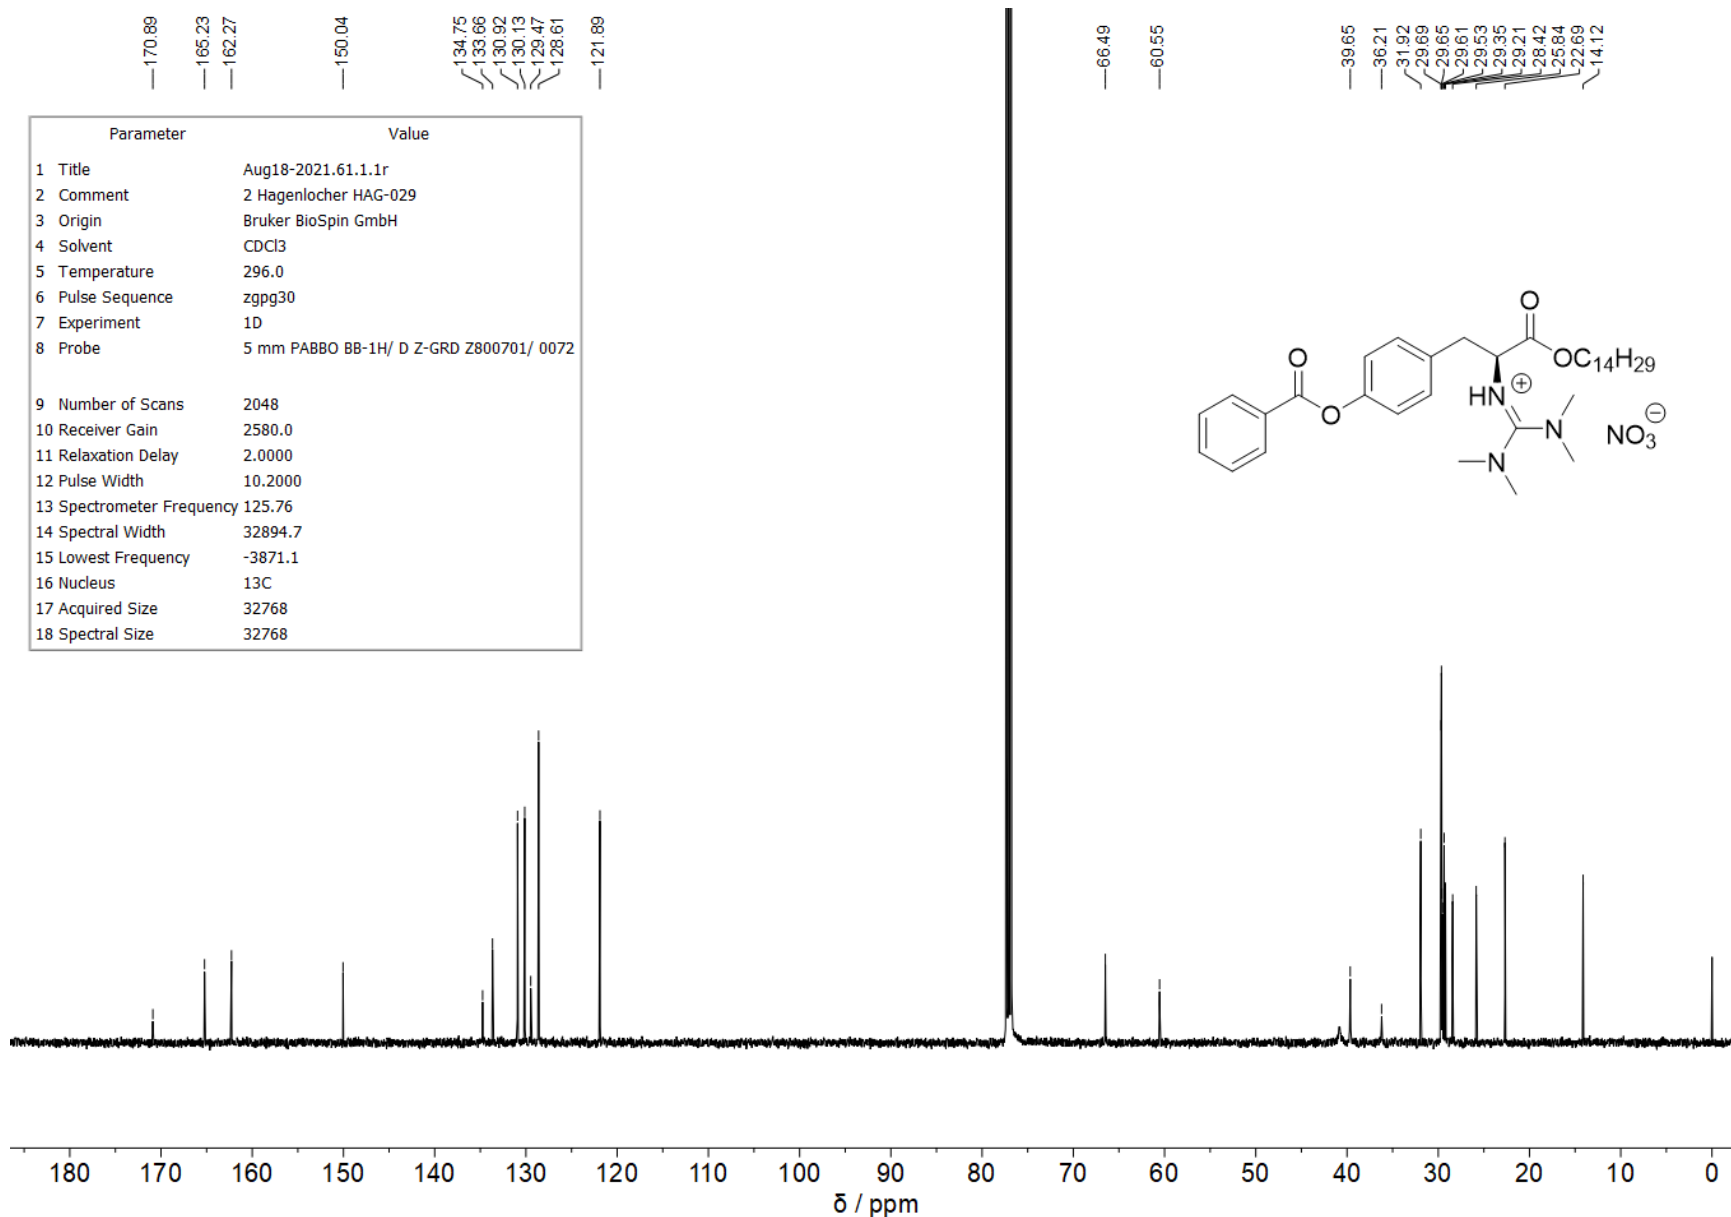

4-C<sub>14</sub>TyrC<sub>14</sub>I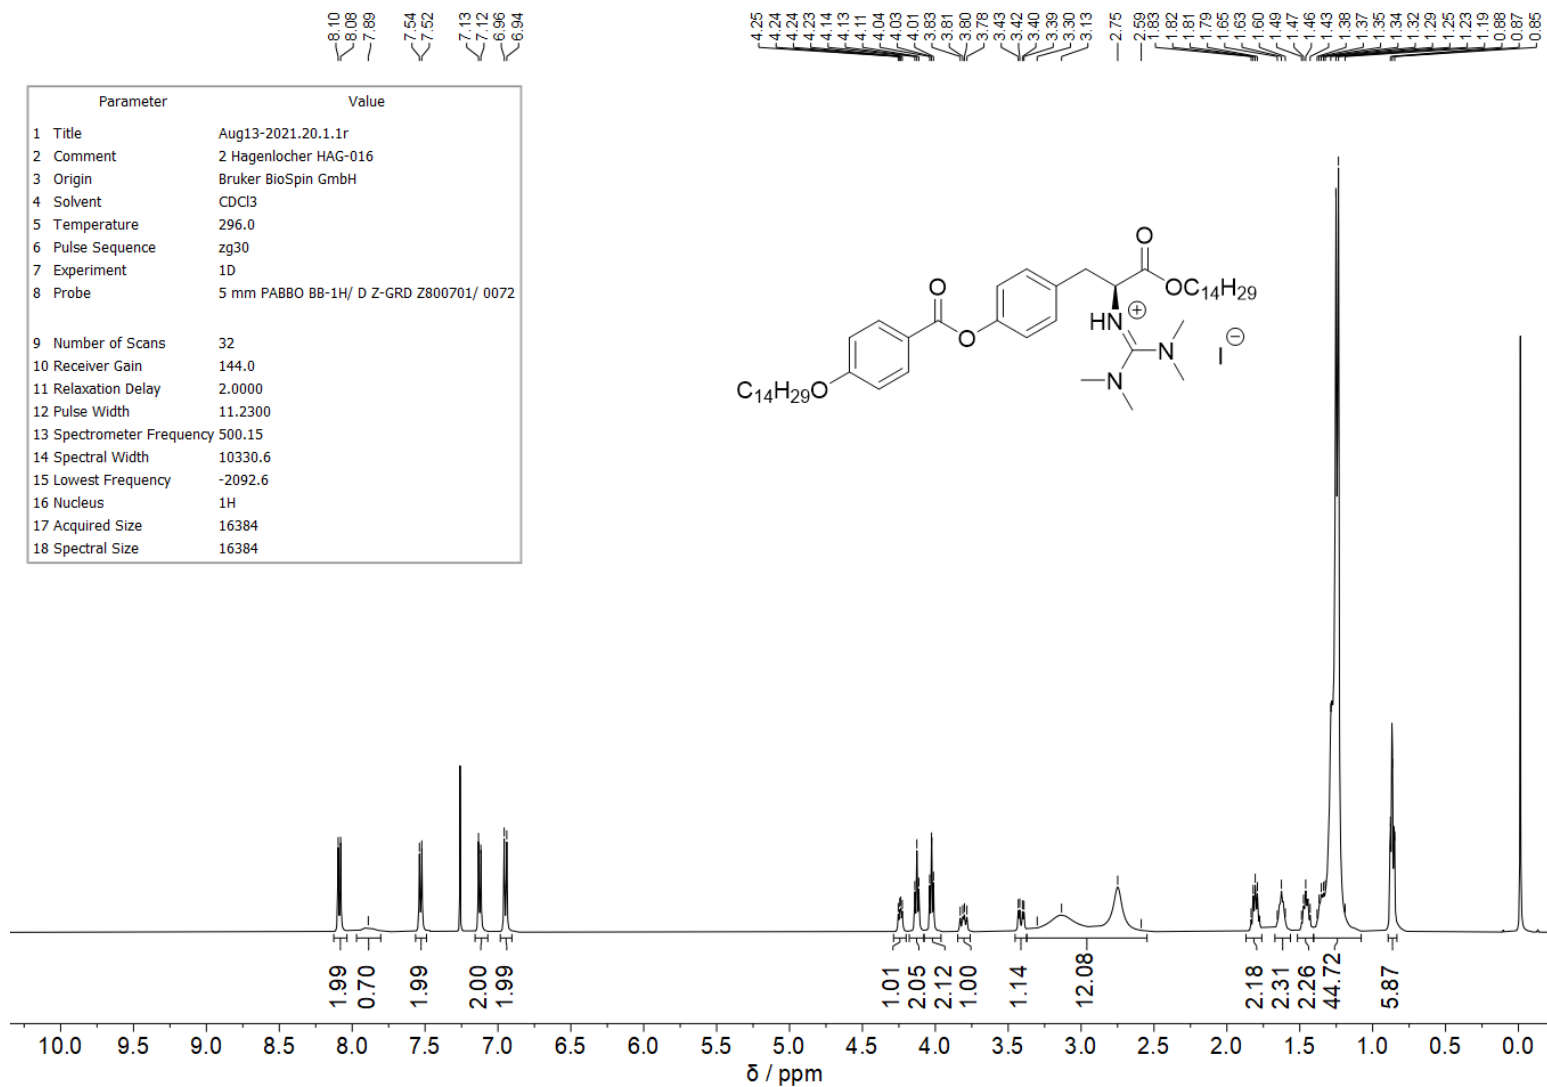

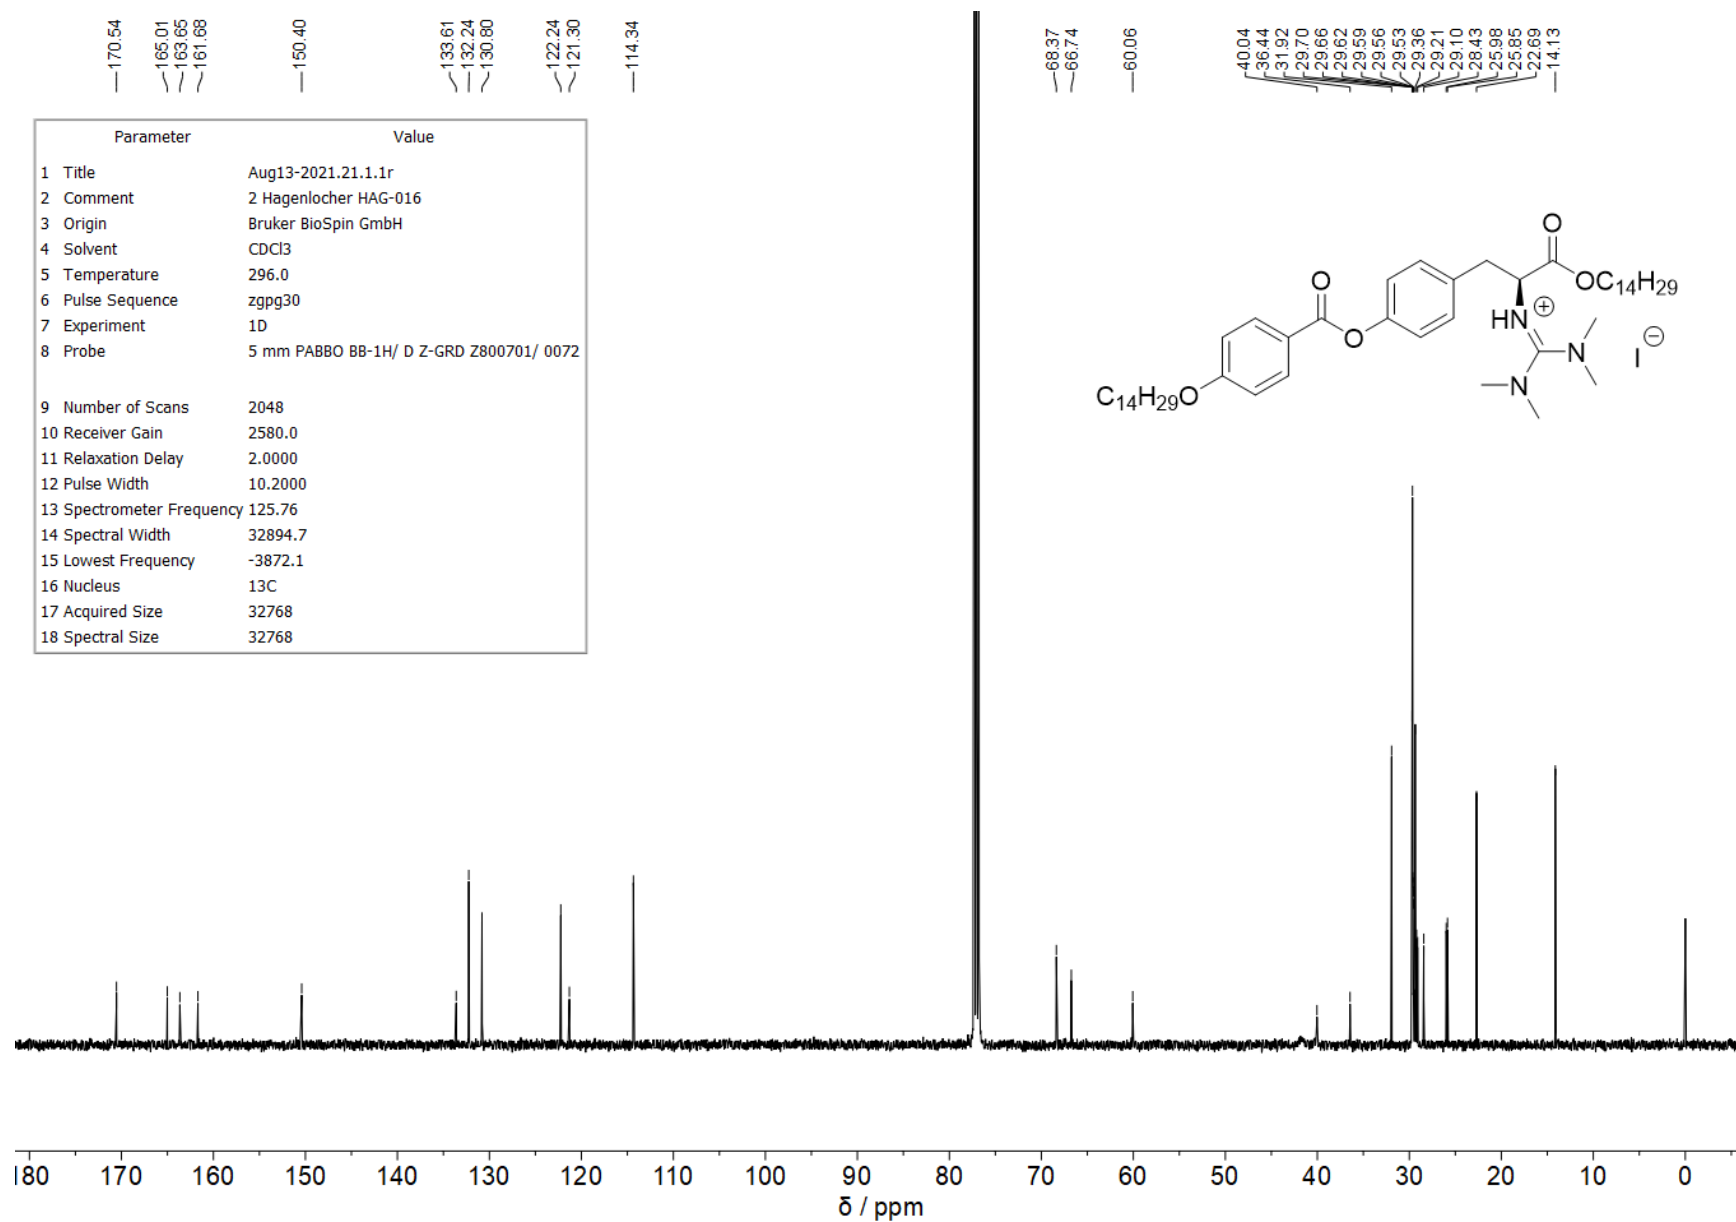

4-C<sub>14</sub>TyrC<sub>14</sub>PF<sub>6</sub>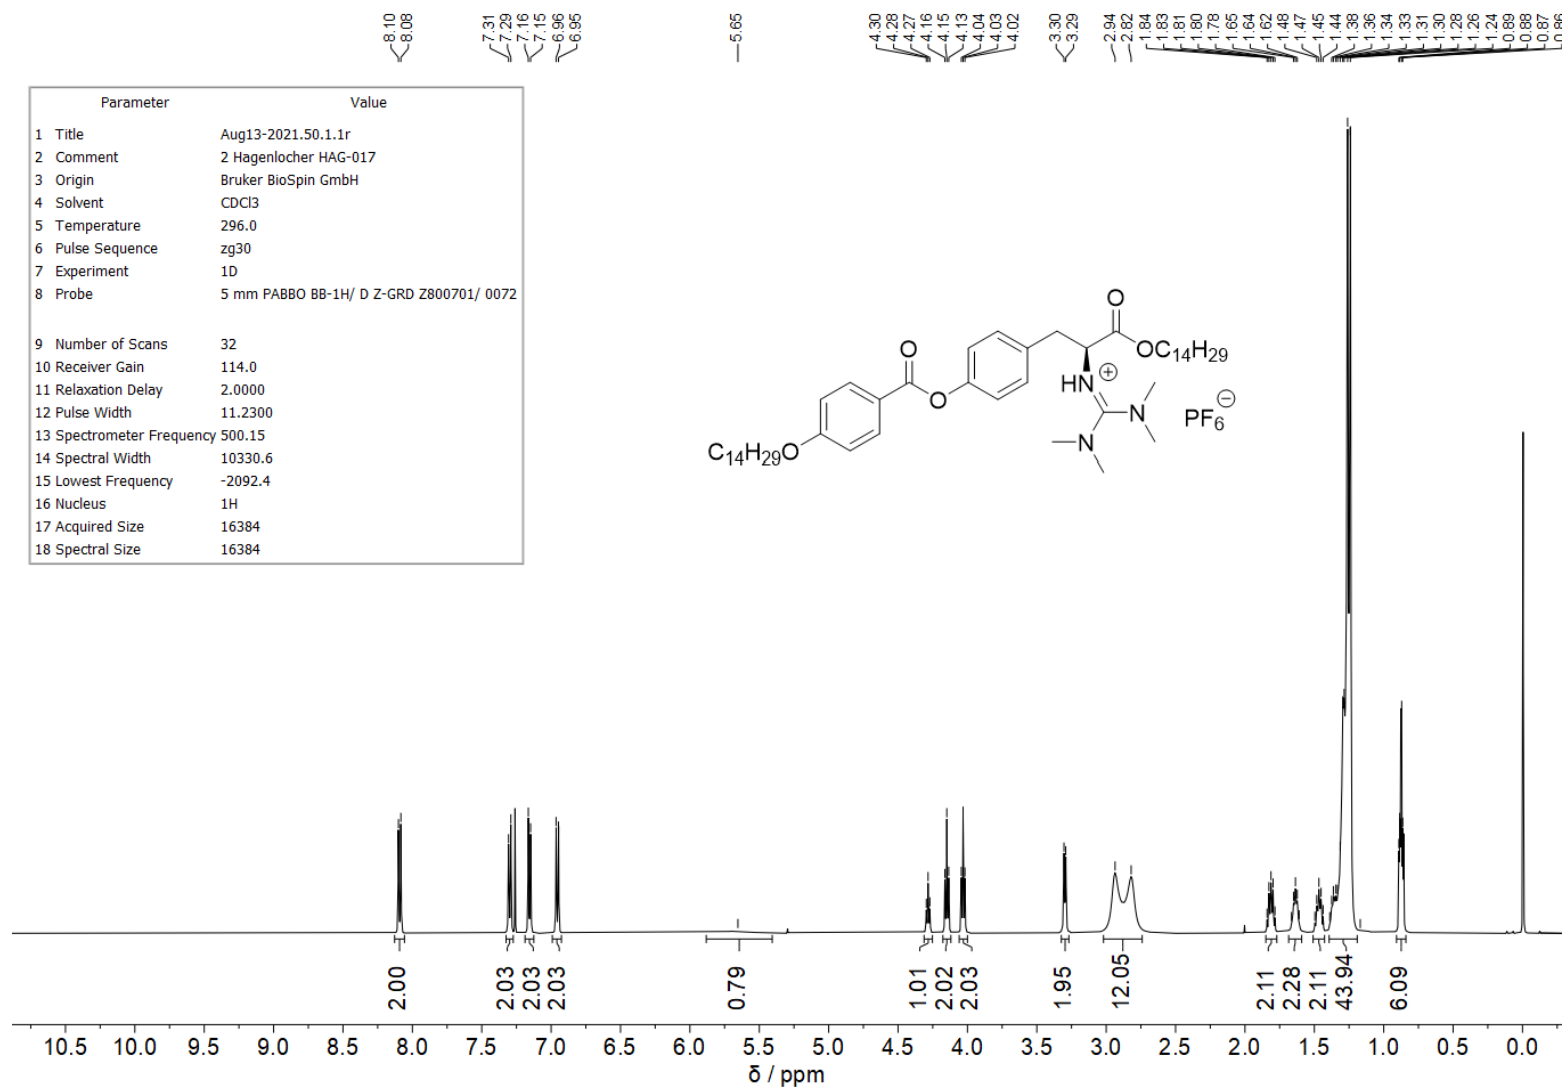

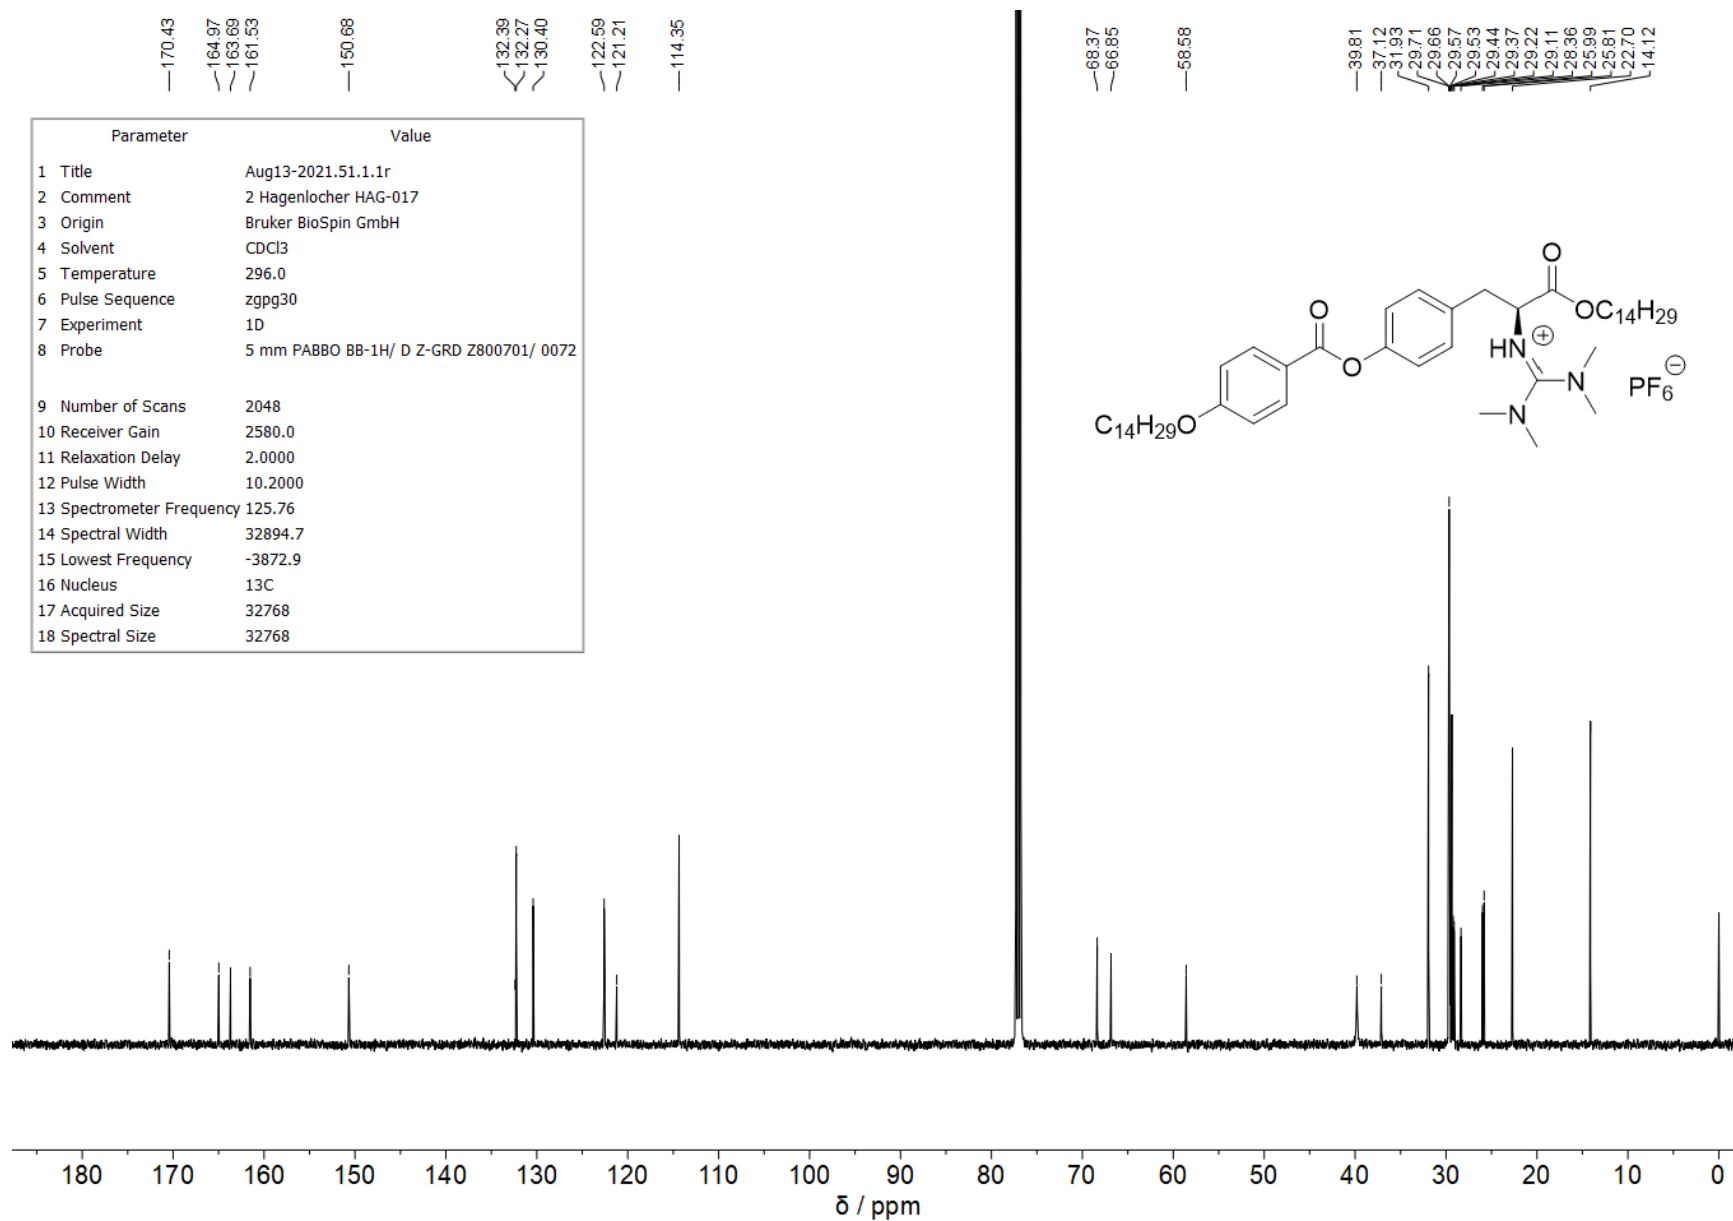

| Parameter                 | Value                                        |
|---------------------------|----------------------------------------------|
| 1 Title                   | Oct12-2021.130.fid                           |
| 2 Comment                 | 02 Hagenlocher HAG017                        |
| 3 Origin                  | Bruker BioSpin GmbH                          |
| 4 Solvent                 | CDCl3                                        |
| 5 Temperature             | 298.0                                        |
| 6 Pulse Sequence          | zgfgqn                                       |
| 7 Experiment              | 1D                                           |
| 8 Probe                   | 5 mm PABBO BB/ 19F-1H/ D Z-GRD Z108618/ 0806 |
| 9 Number of Scans         | 16                                           |
| 10 Receiver Gain          | 205.3                                        |
| 11 Relaxation Delay       | 1.0000                                       |
| 12 Pulse Width            | 14.6500                                      |
| 13 Spectrometer Frequency | 376.43                                       |
| 14 Spectral Width         | 89285.7                                      |
| 15 Lowest Frequency       | -82289.9                                     |
| 16 Nucleus                | 19F                                          |
| 17 Acquired Size          | 65536                                        |
| 18 Spectral Size          | 131072                                       |

71.50  
73.39

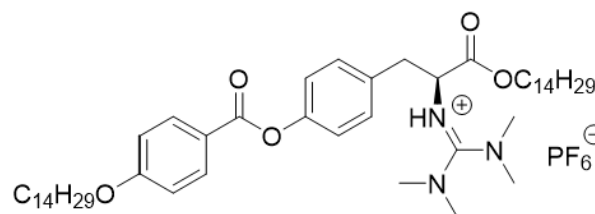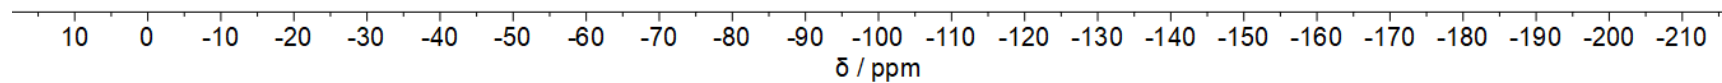



4-C<sub>14</sub>TyrC<sub>14</sub>BF<sub>4</sub>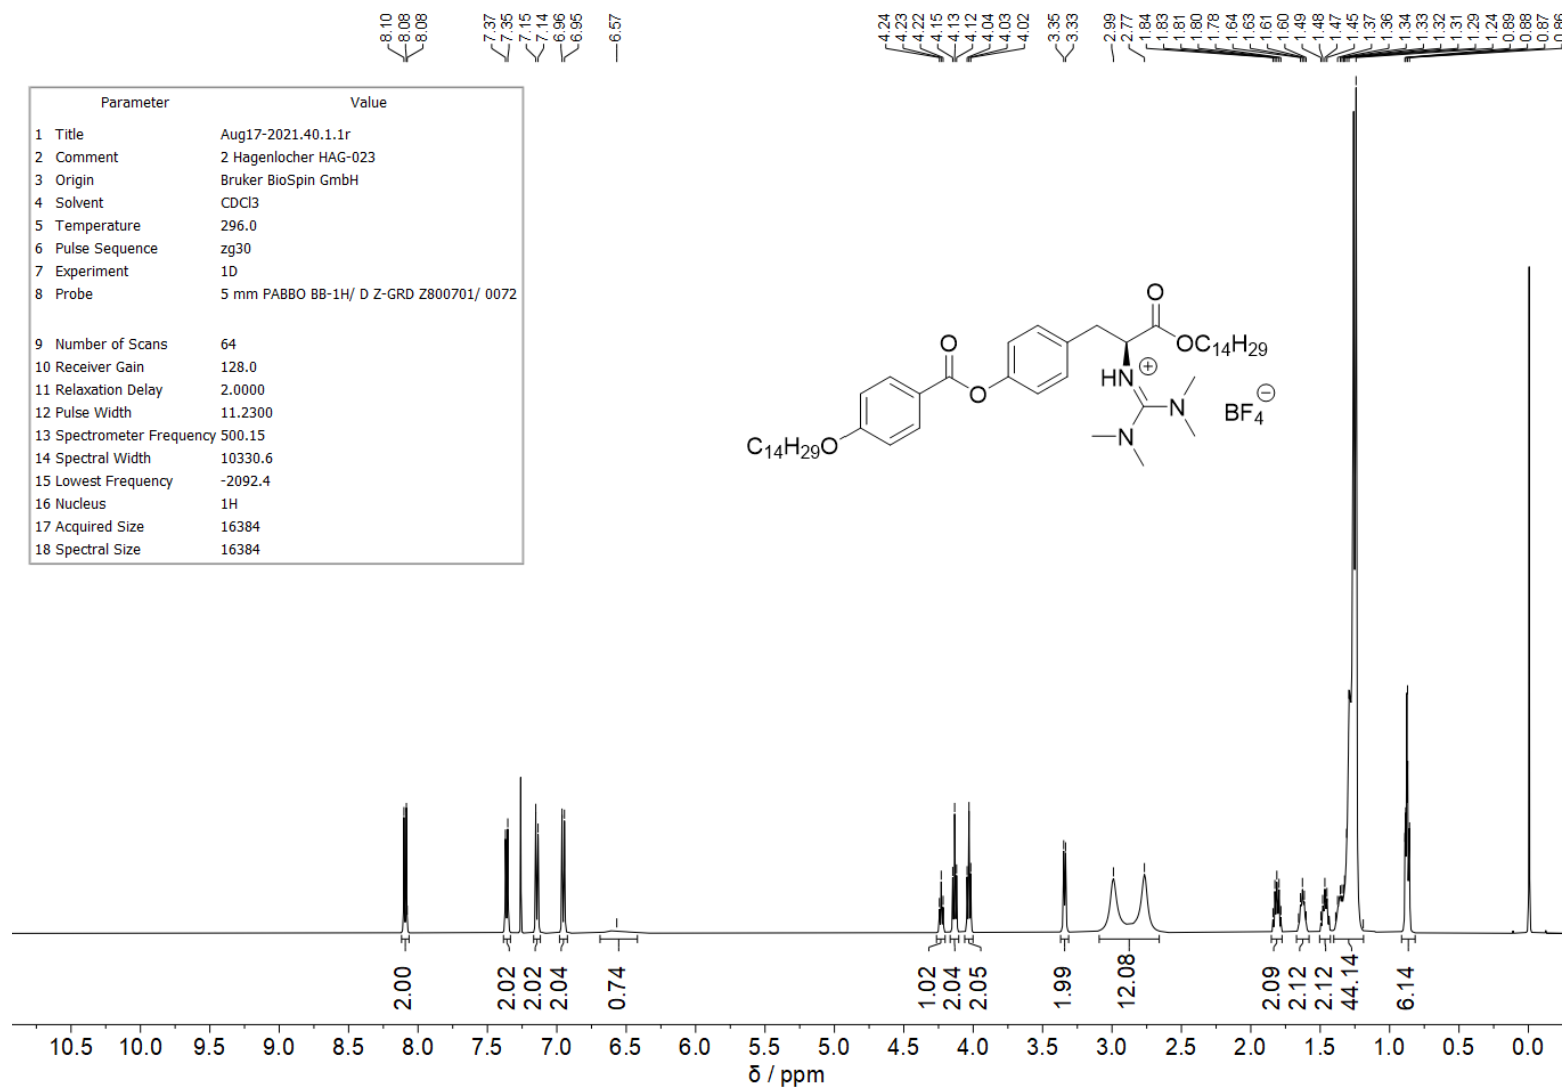

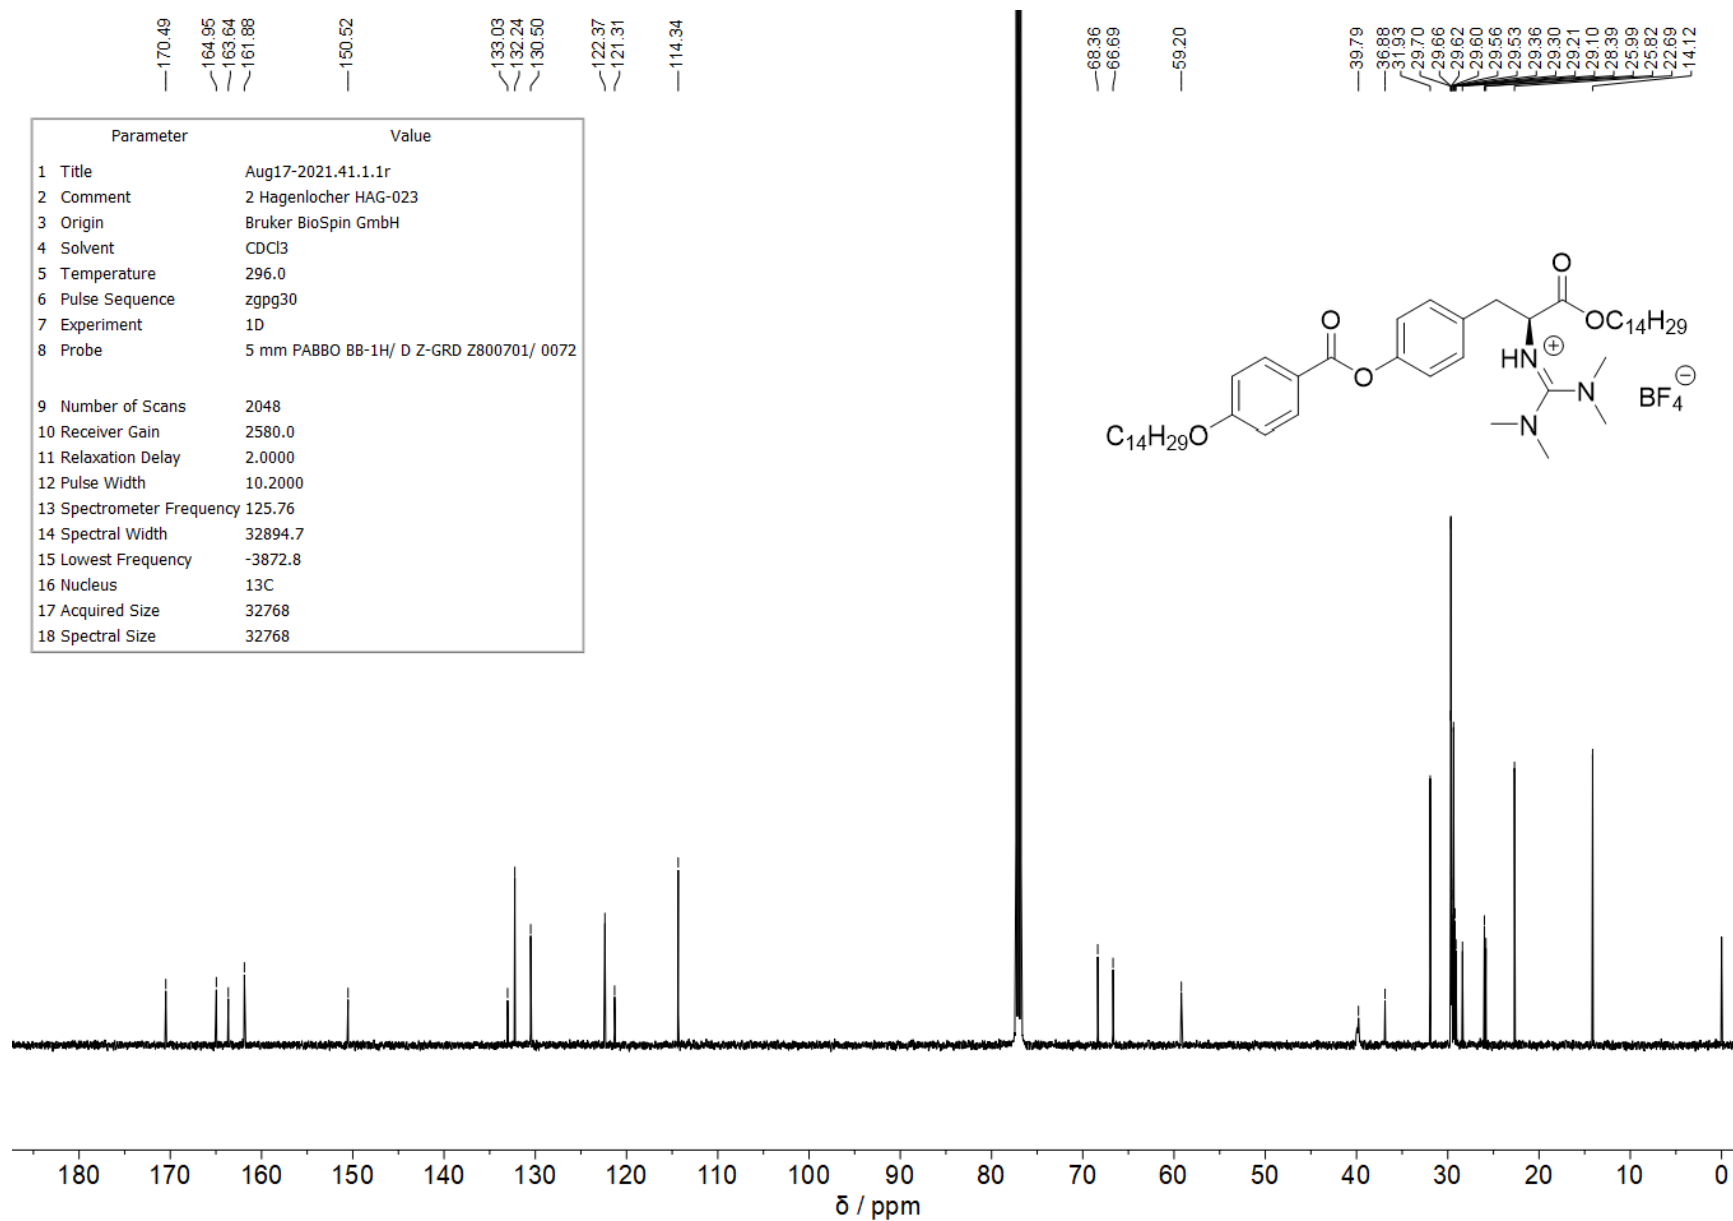

| Parameter                 | Value                                        |
|---------------------------|----------------------------------------------|
| 1 Title                   | Oct12-2021.80.fid                            |
| 2 Comment                 | 02 Hagenlocher HAG023                        |
| 3 Origin                  | Bruker BioSpin GmbH                          |
| 4 Solvent                 | CDCl3                                        |
| 5 Temperature             | 298.0                                        |
| 6 Pulse Sequence          | zgfgqn                                       |
| 7 Experiment              | 1D                                           |
| 8 Probe                   | 5 mm PABBO BB/ 19F-1H/ D Z-GRD Z108618/ 0806 |
| 9 Number of Scans         | 16                                           |
| 10 Receiver Gain          | 205.3                                        |
| 11 Relaxation Delay       | 1.0000                                       |
| 12 Pulse Width            | 14.6500                                      |
| 13 Spectrometer Frequency | 376.43                                       |
| 14 Spectral Width         | 89285.7                                      |
| 15 Lowest Frequency       | -82289.9                                     |
| 16 Nucleus                | 19F                                          |
| 17 Acquired Size          | 65536                                        |
| 18 Spectral Size          | 131072                                       |

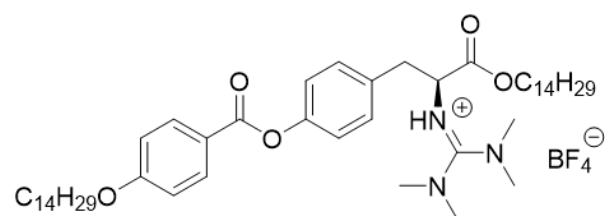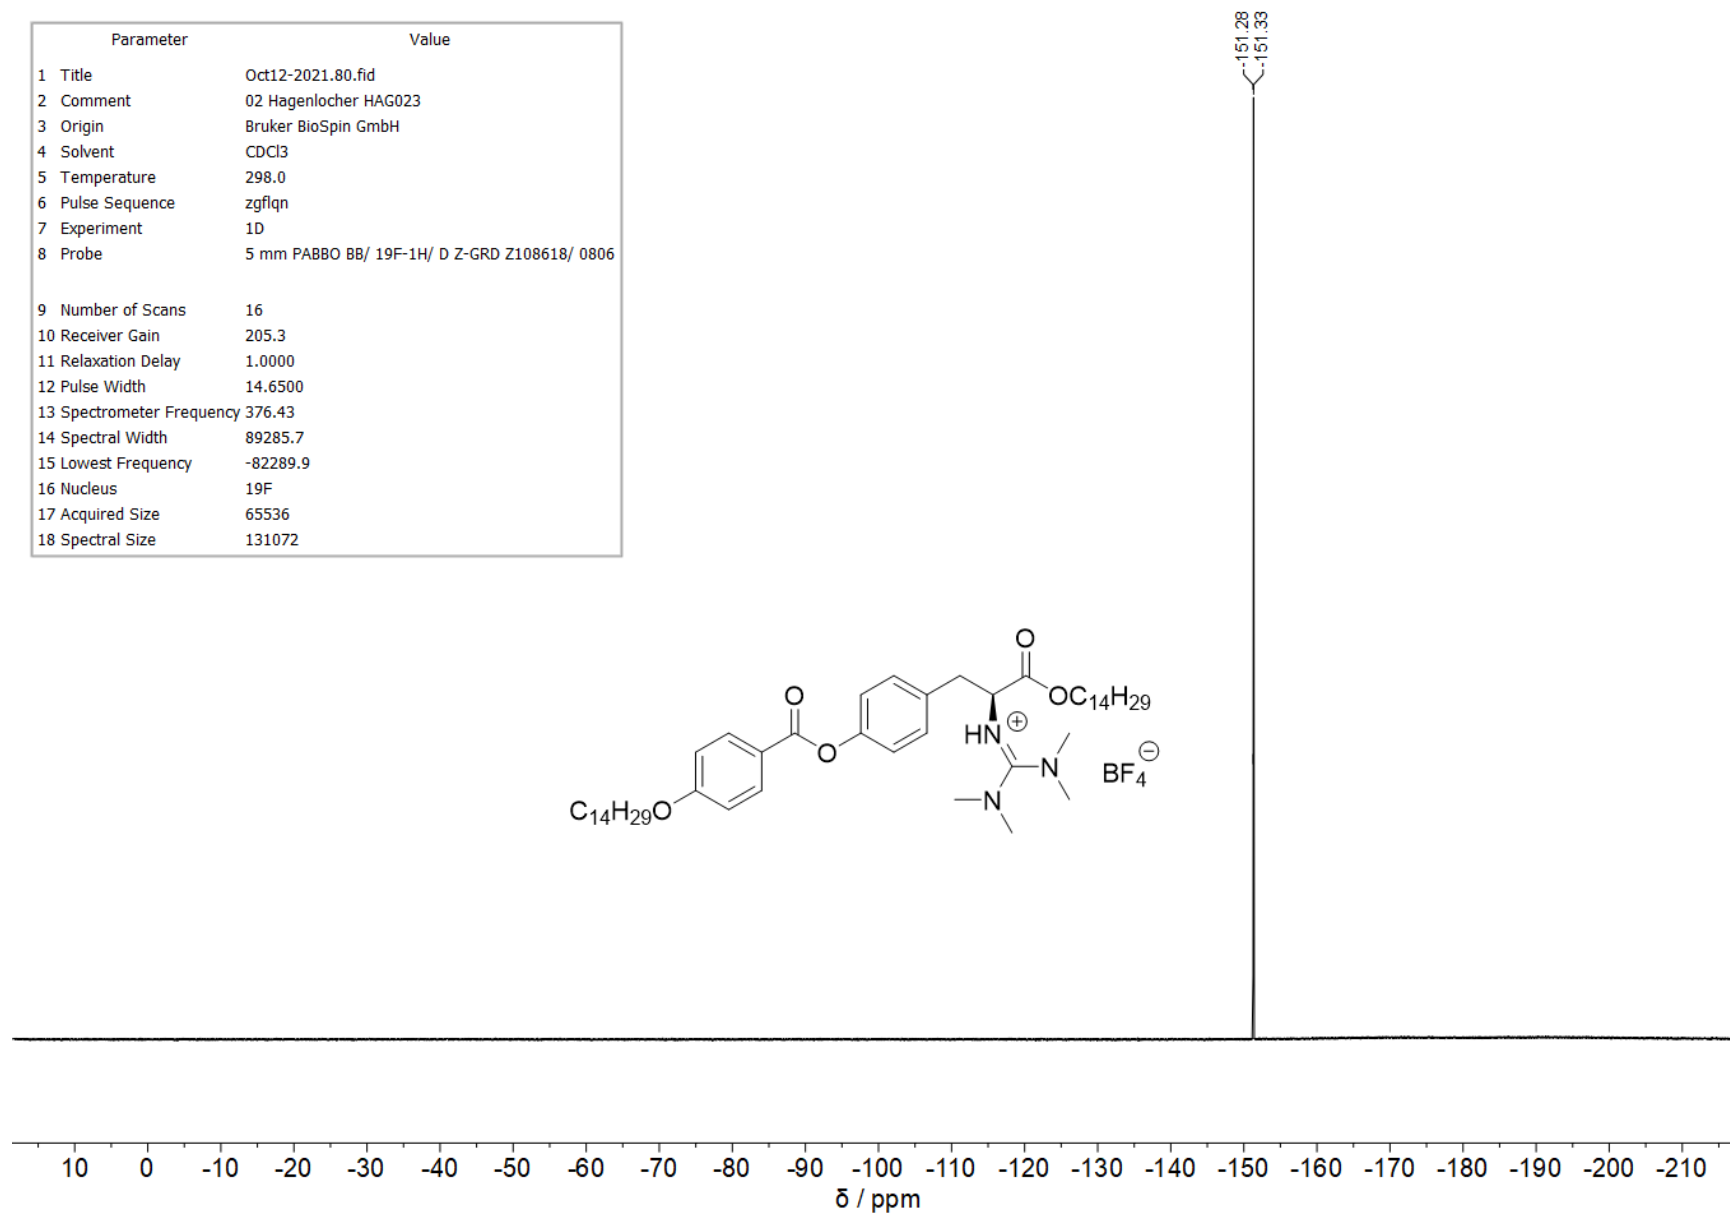

4-C<sub>14</sub>TyrC<sub>14</sub>NO<sub>3</sub>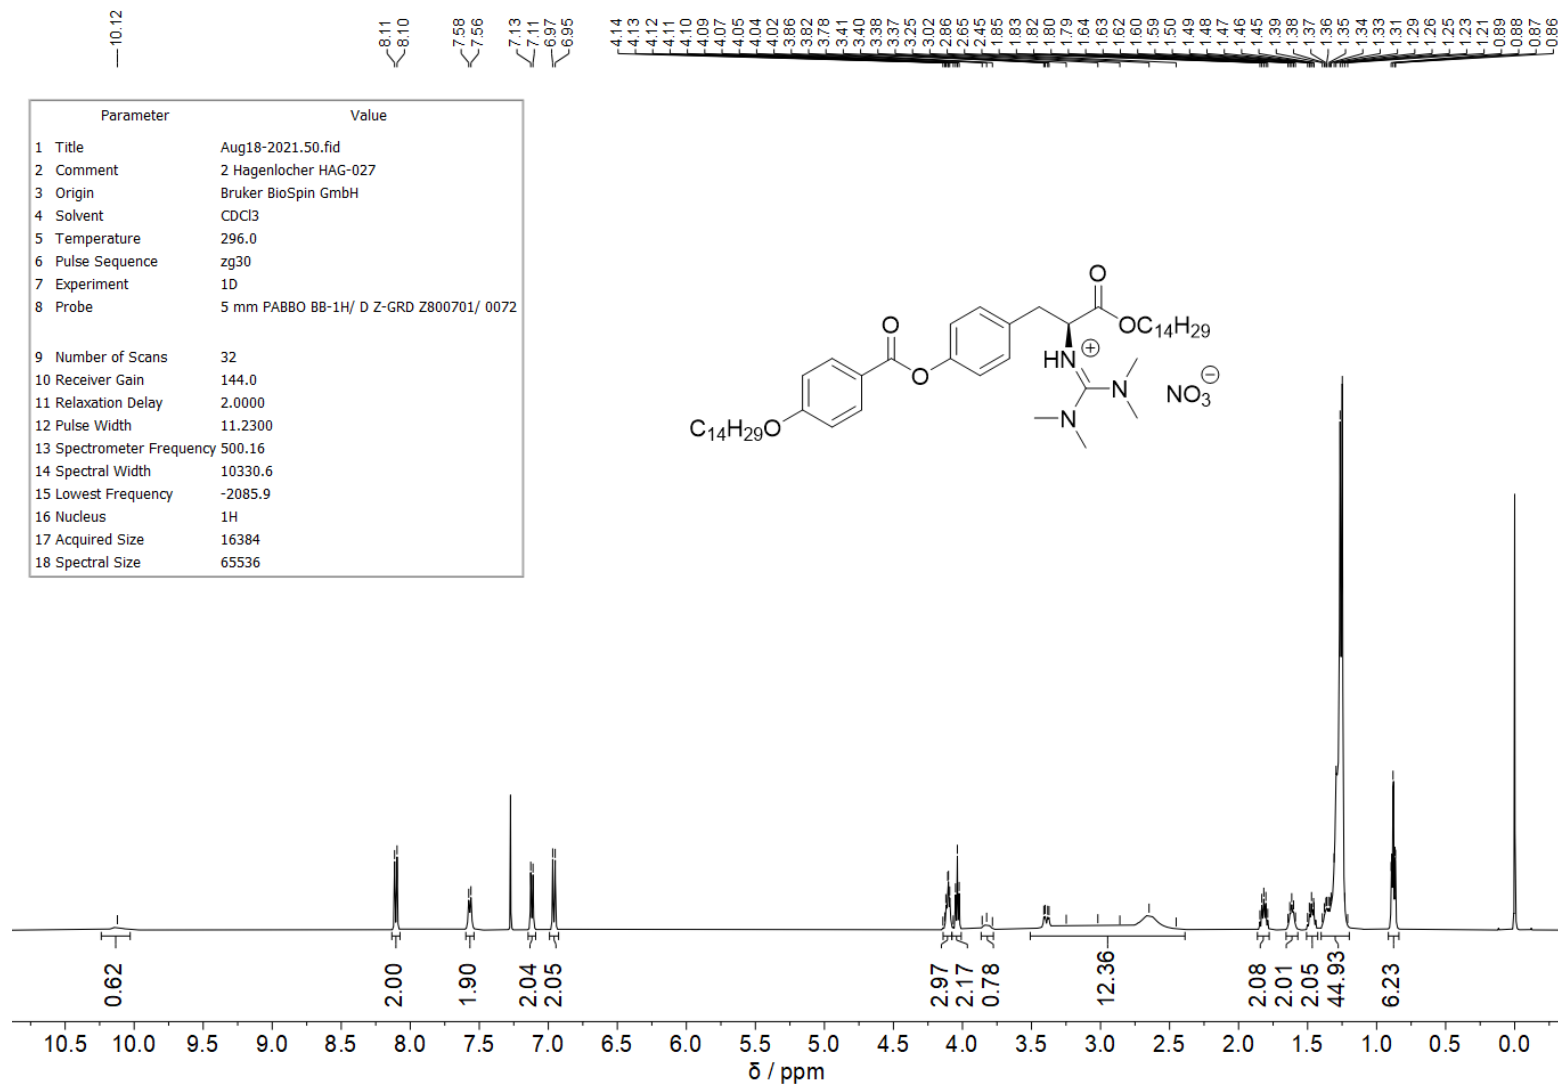

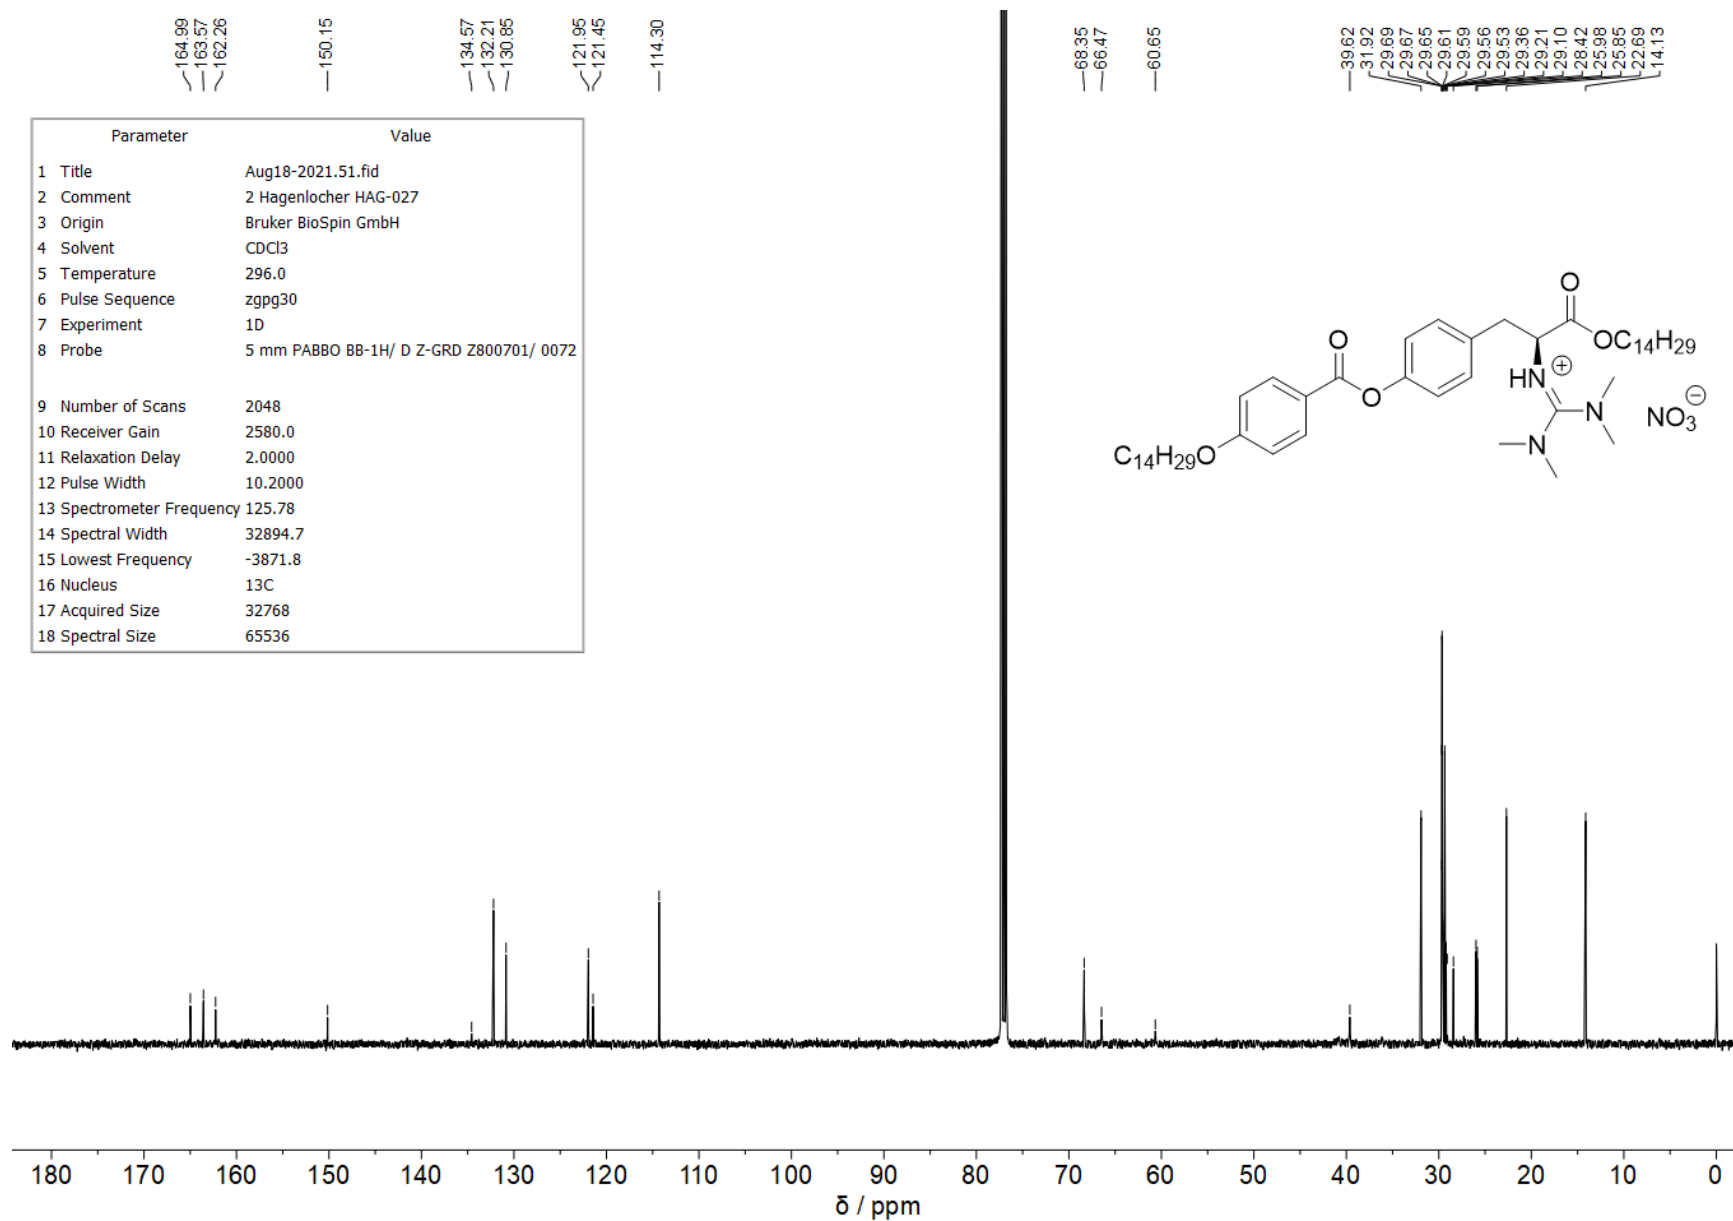

## 3,4-C14TyrC14I

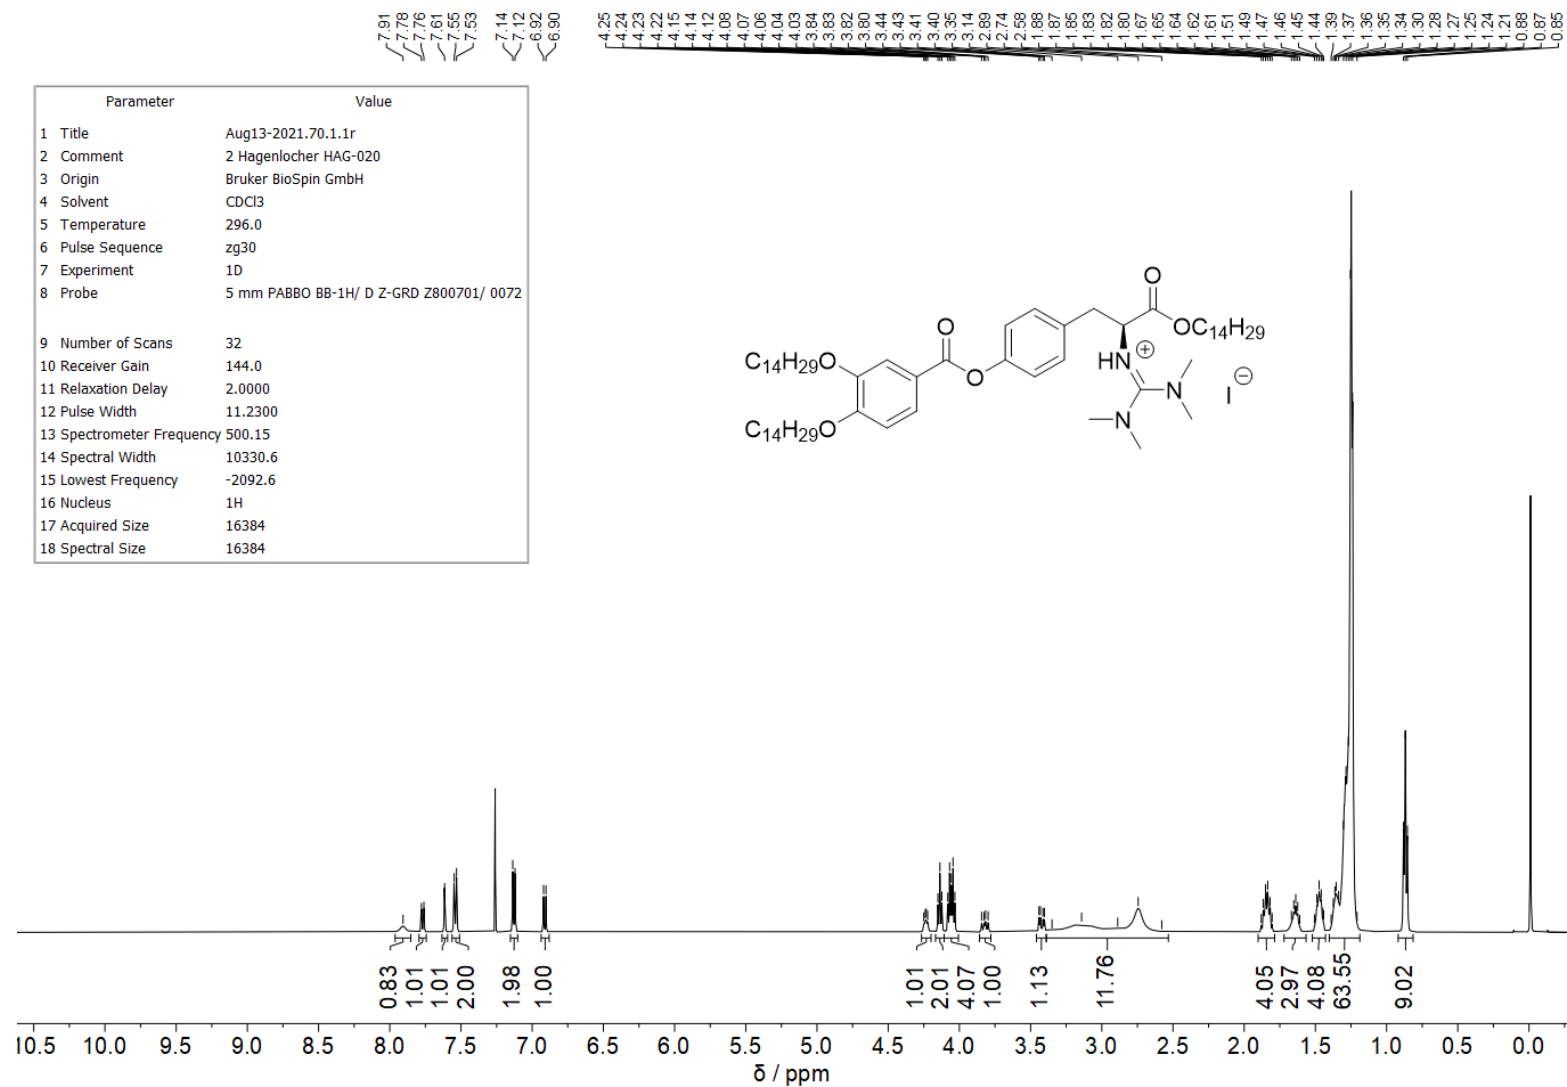

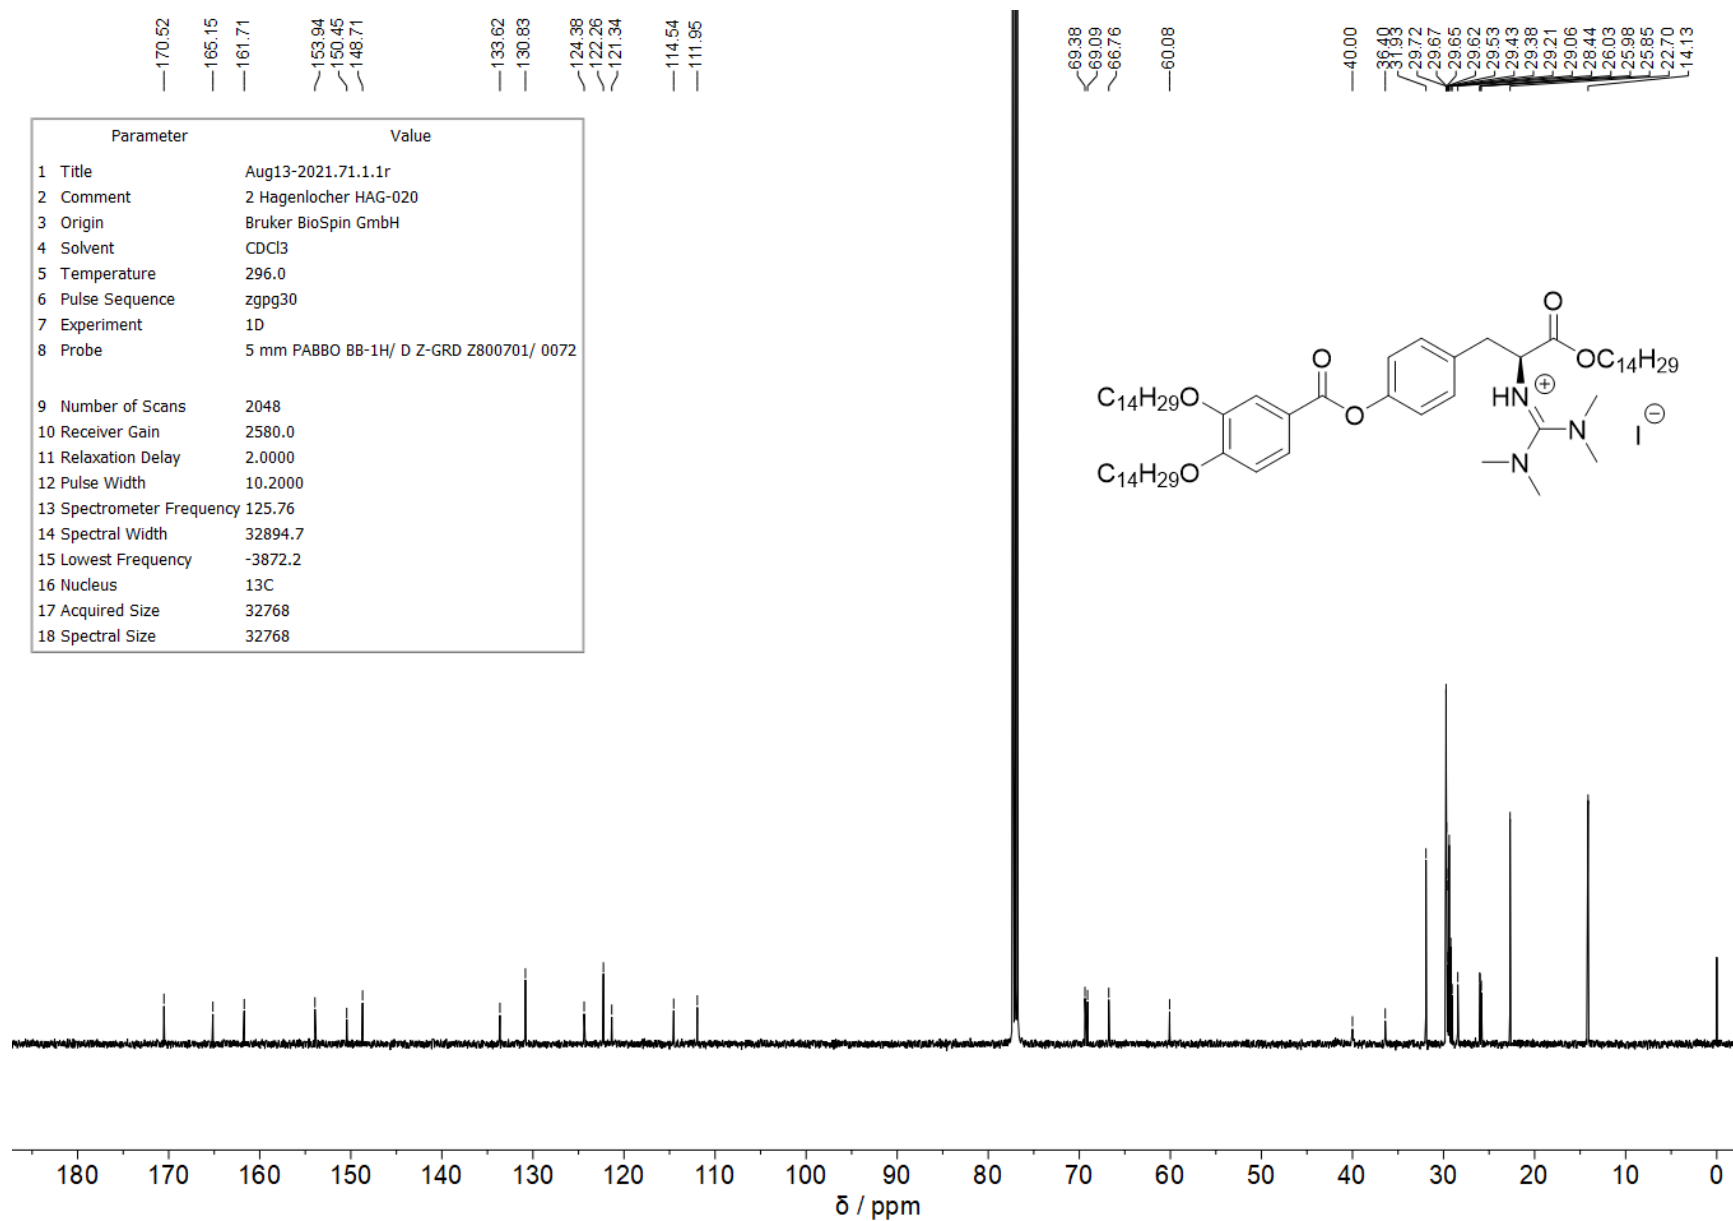

## 3,4-C14TyrC14PF6

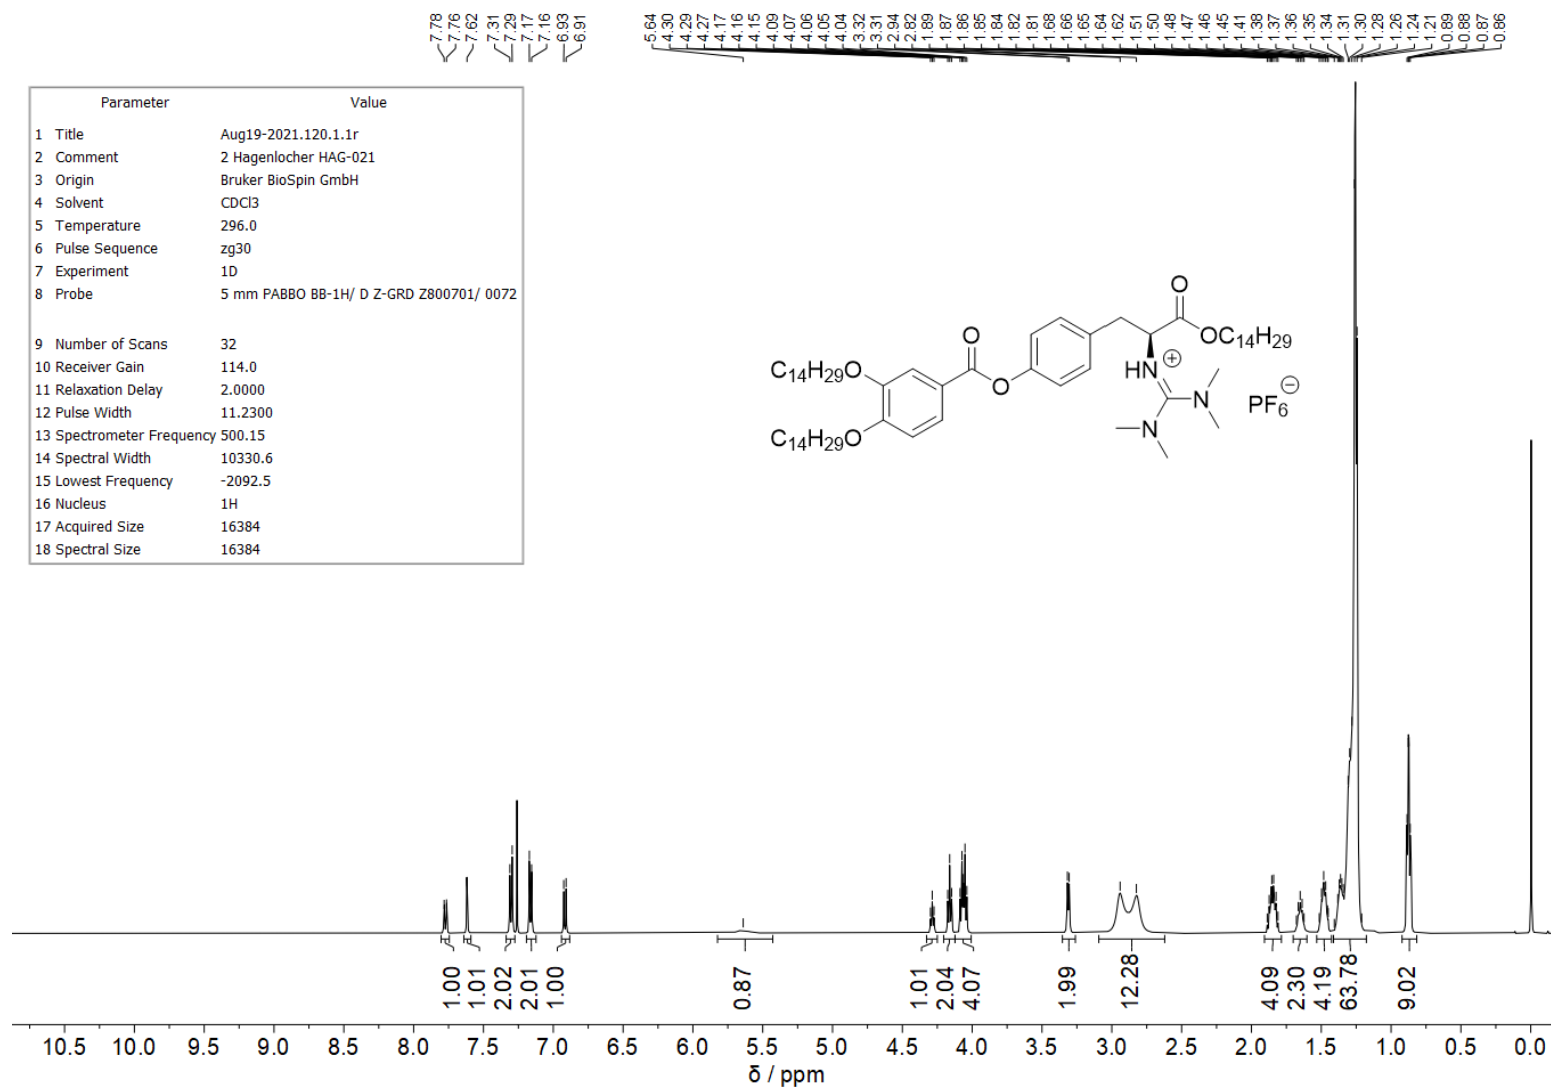



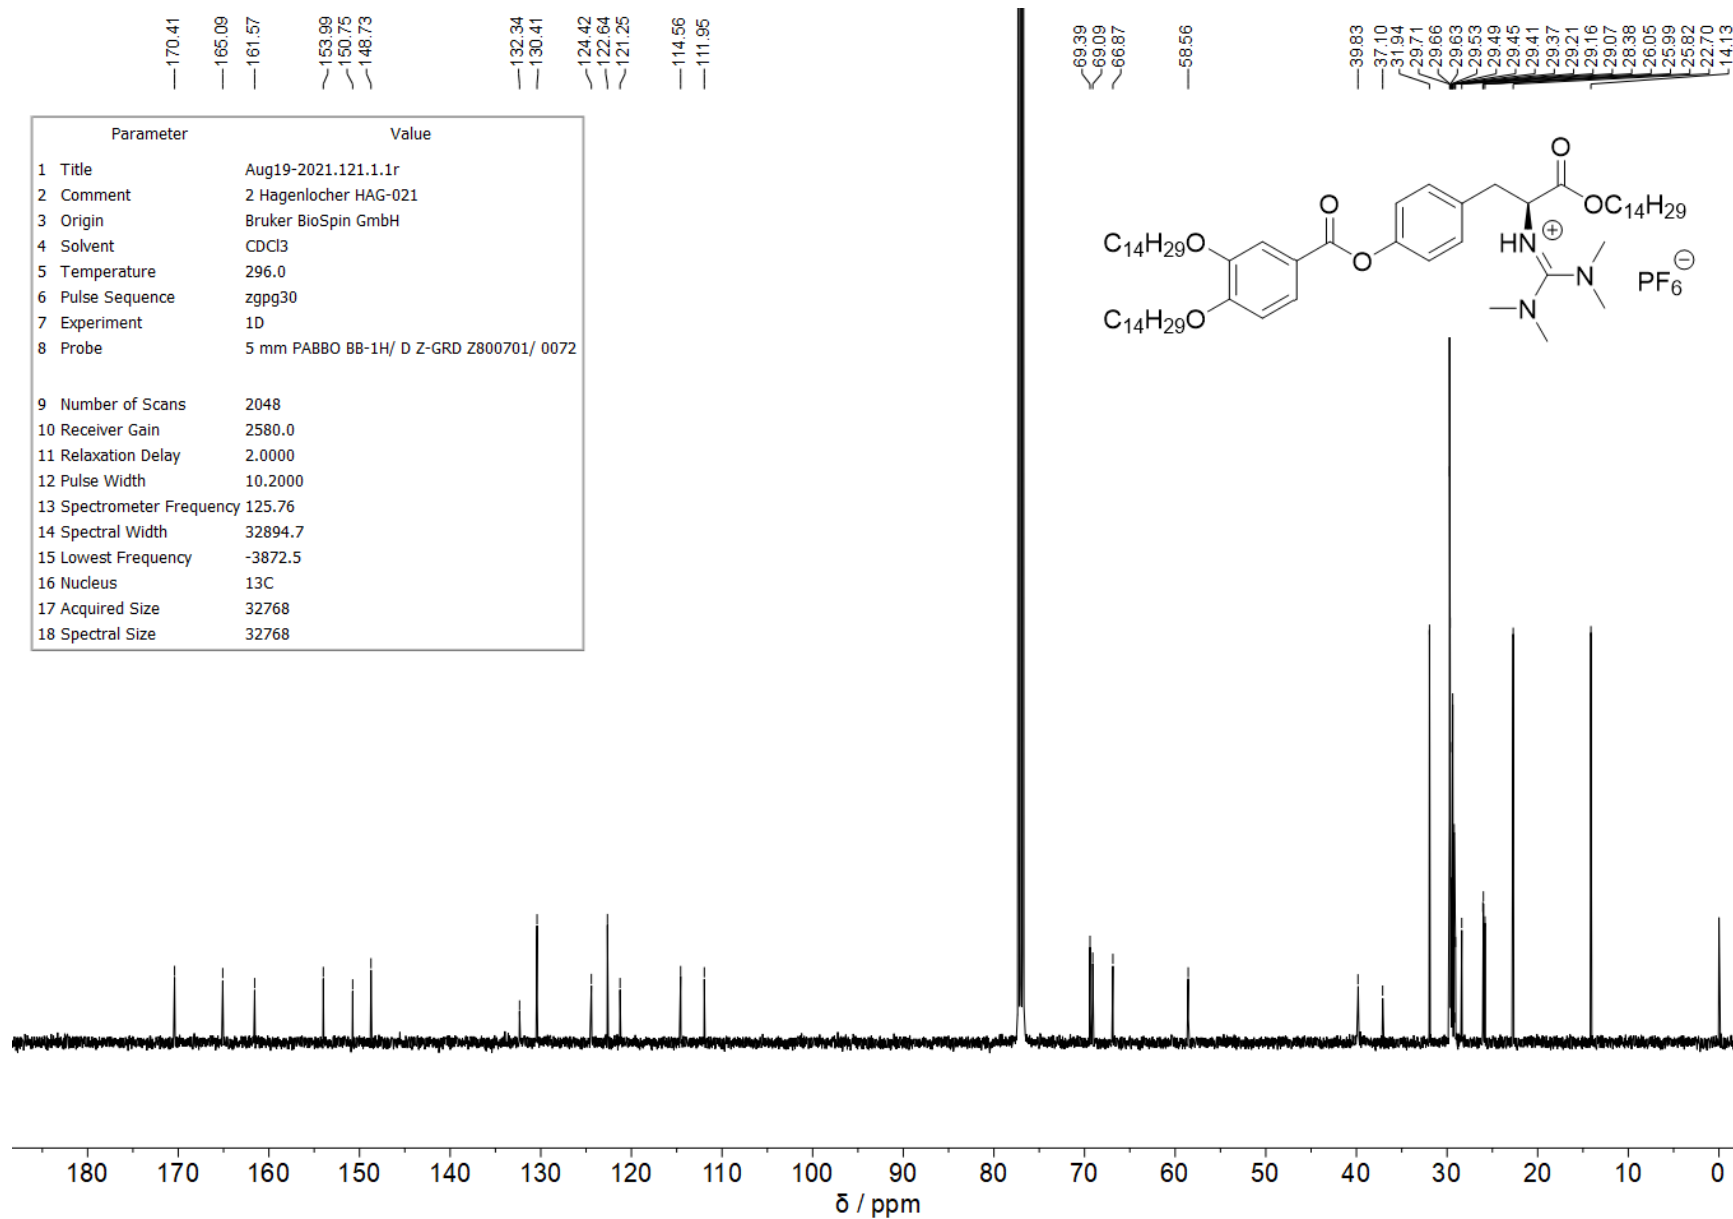

| Parameter                 | Value                                        |
|---------------------------|----------------------------------------------|
| 1 Title                   | Oct12-2021.100.fid                           |
| 2 Comment                 | 02 Hagenlocher HAG021                        |
| 3 Origin                  | Bruker BioSpin GmbH                          |
| 4 Solvent                 | CDCl3                                        |
| 5 Temperature             | 298.0                                        |
| 6 Pulse Sequence          | zgfgq                                        |
| 7 Experiment              | 1D                                           |
| 8 Probe                   | 5 mm PABBO BB/ 19F-1H/ D Z-GRD Z108618/ 0806 |
| 9 Number of Scans         | 16                                           |
| 10 Receiver Gain          | 205.3                                        |
| 11 Relaxation Delay       | 1.0000                                       |
| 12 Pulse Width            | 14.6500                                      |
| 13 Spectrometer Frequency | 376.43                                       |
| 14 Spectral Width         | 89285.7                                      |
| 15 Lowest Frequency       | -82289.9                                     |
| 16 Nucleus                | 19F                                          |
| 17 Acquired Size          | 65536                                        |
| 18 Spectral Size          | 131072                                       |

71.54  
73.43

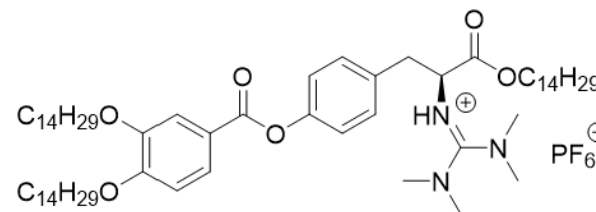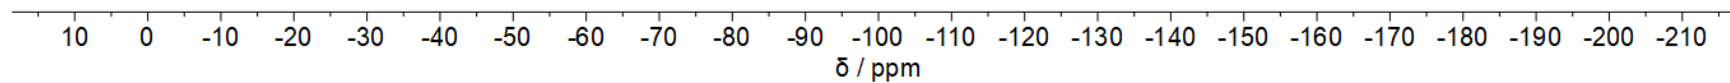

3,4-C<sub>14</sub>TyrC<sub>14</sub>BF<sub>4</sub>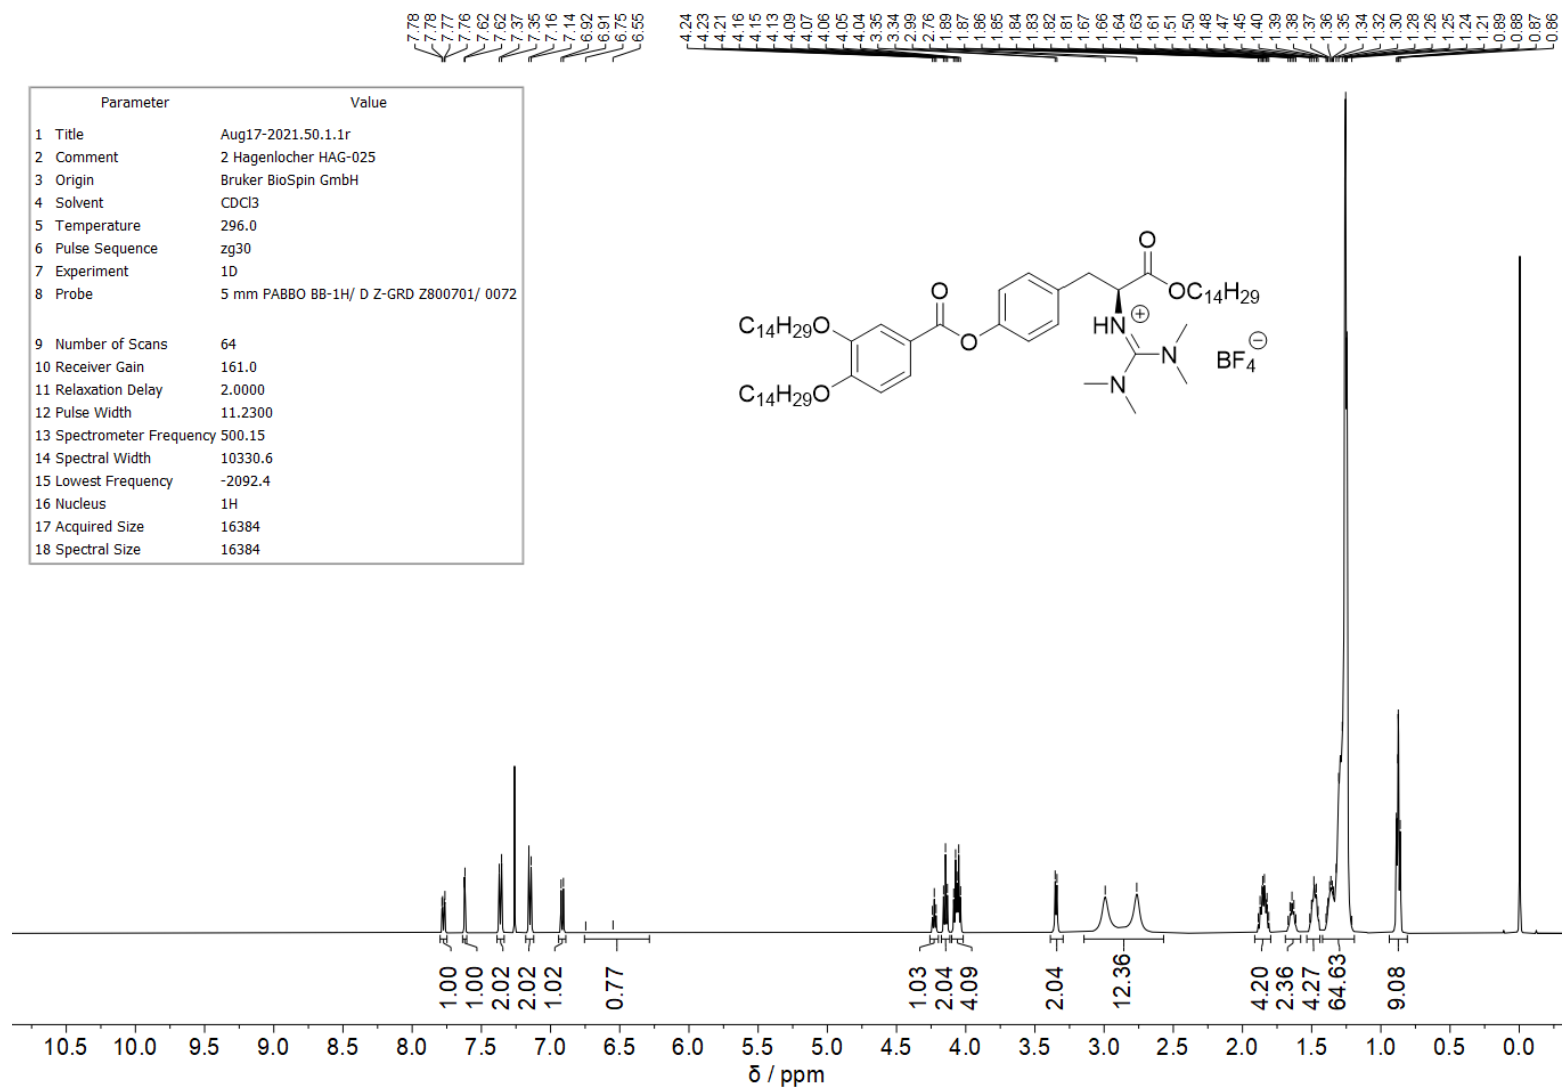

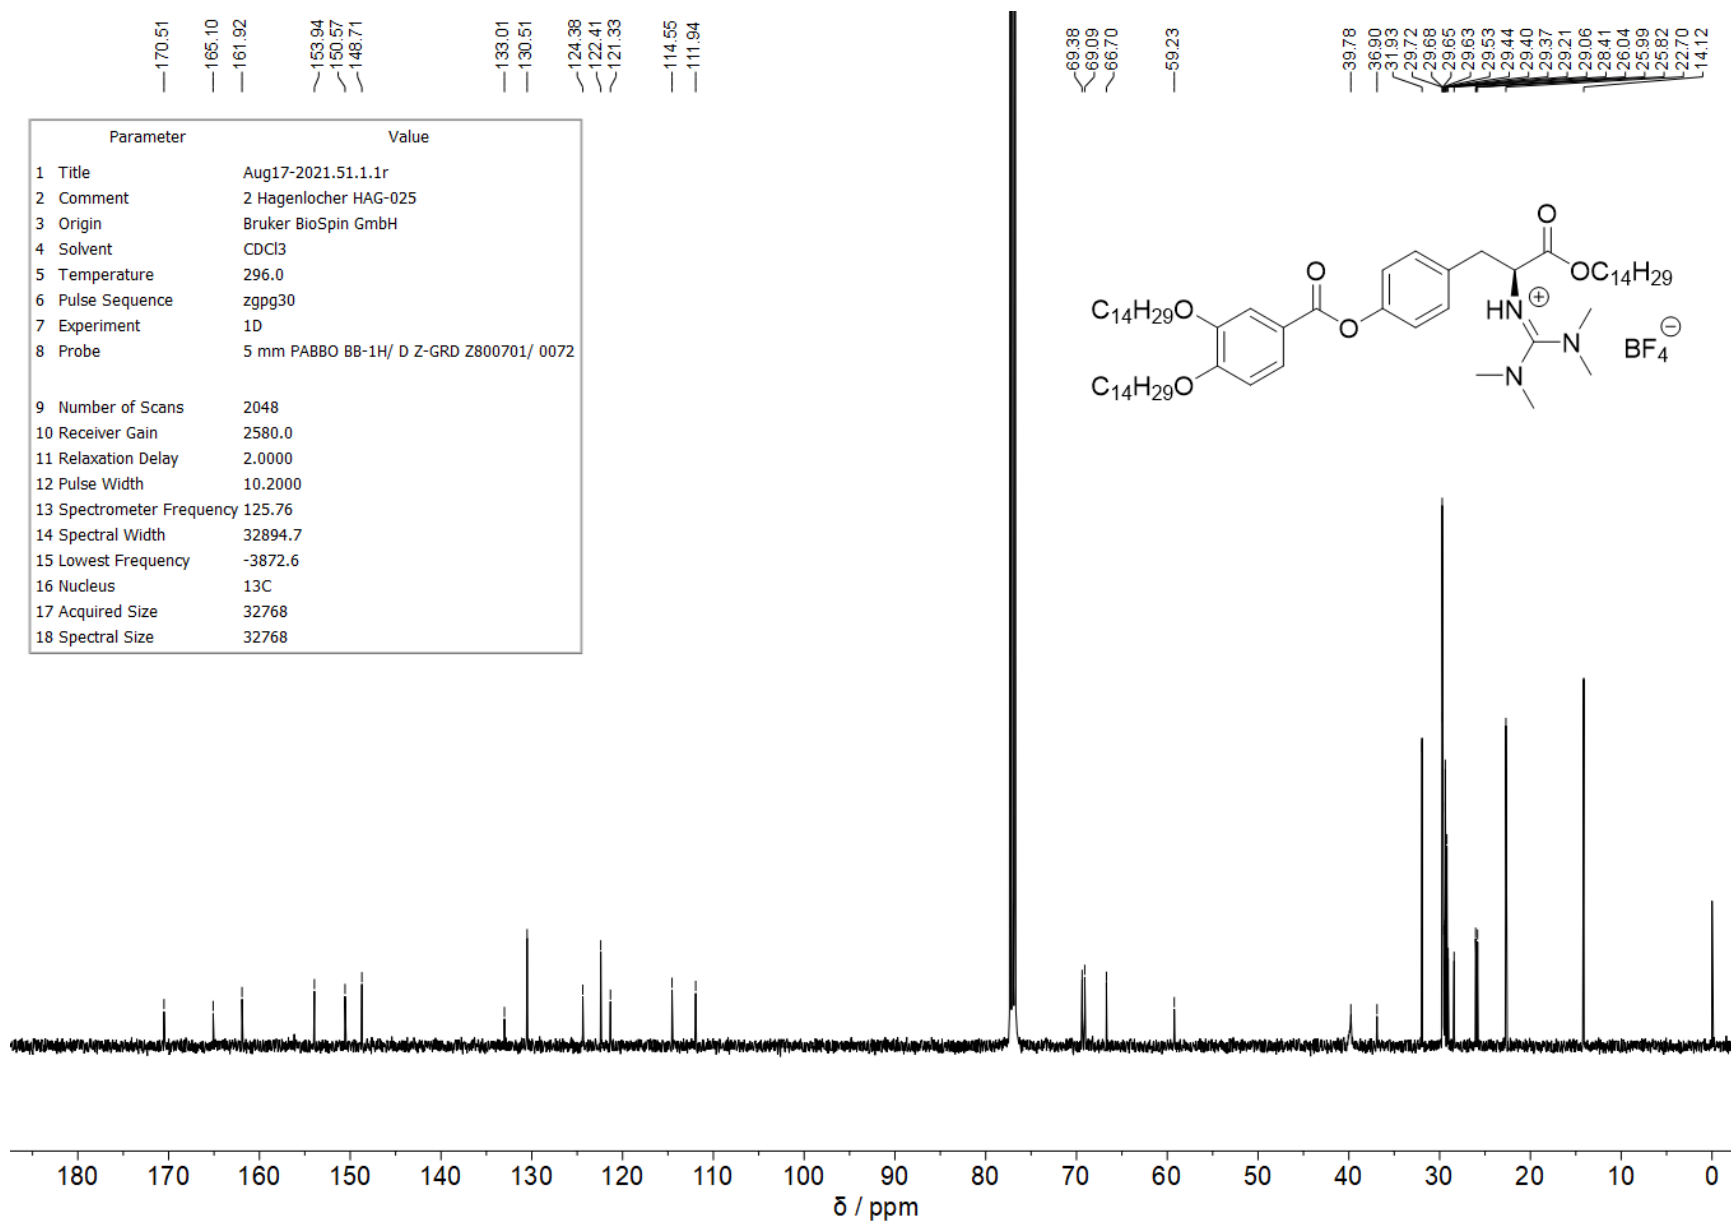

| Parameter                 | Value                                        |
|---------------------------|----------------------------------------------|
| 1 Title                   | Oct12-2021.110.fid                           |
| 2 Comment                 | 02 Hagenlocher HAG025                        |
| 3 Origin                  | Bruker BioSpin GmbH                          |
| 4 Solvent                 | CDCl3                                        |
| 5 Temperature             | 298.0                                        |
| 6 Pulse Sequence          | zgfgqn                                       |
| 7 Experiment              | 1D                                           |
| 8 Probe                   | 5 mm PABBO BB/ 19F-1H/ D Z-GRD Z108618/ 0806 |
| 9 Number of Scans         | 16                                           |
| 10 Receiver Gain          | 205.3                                        |
| 11 Relaxation Delay       | 1.0000                                       |
| 12 Pulse Width            | 14.6500                                      |
| 13 Spectrometer Frequency | 376.43                                       |
| 14 Spectral Width         | 89285.7                                      |
| 15 Lowest Frequency       | -82289.9                                     |
| 16 Nucleus                | 19F                                          |
| 17 Acquired Size          | 65536                                        |
| 18 Spectral Size          | 131072                                       |

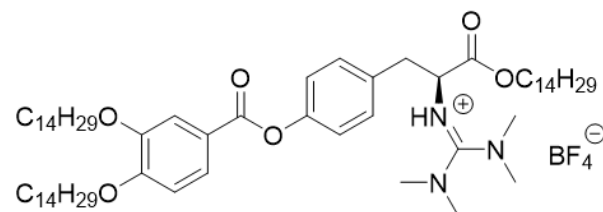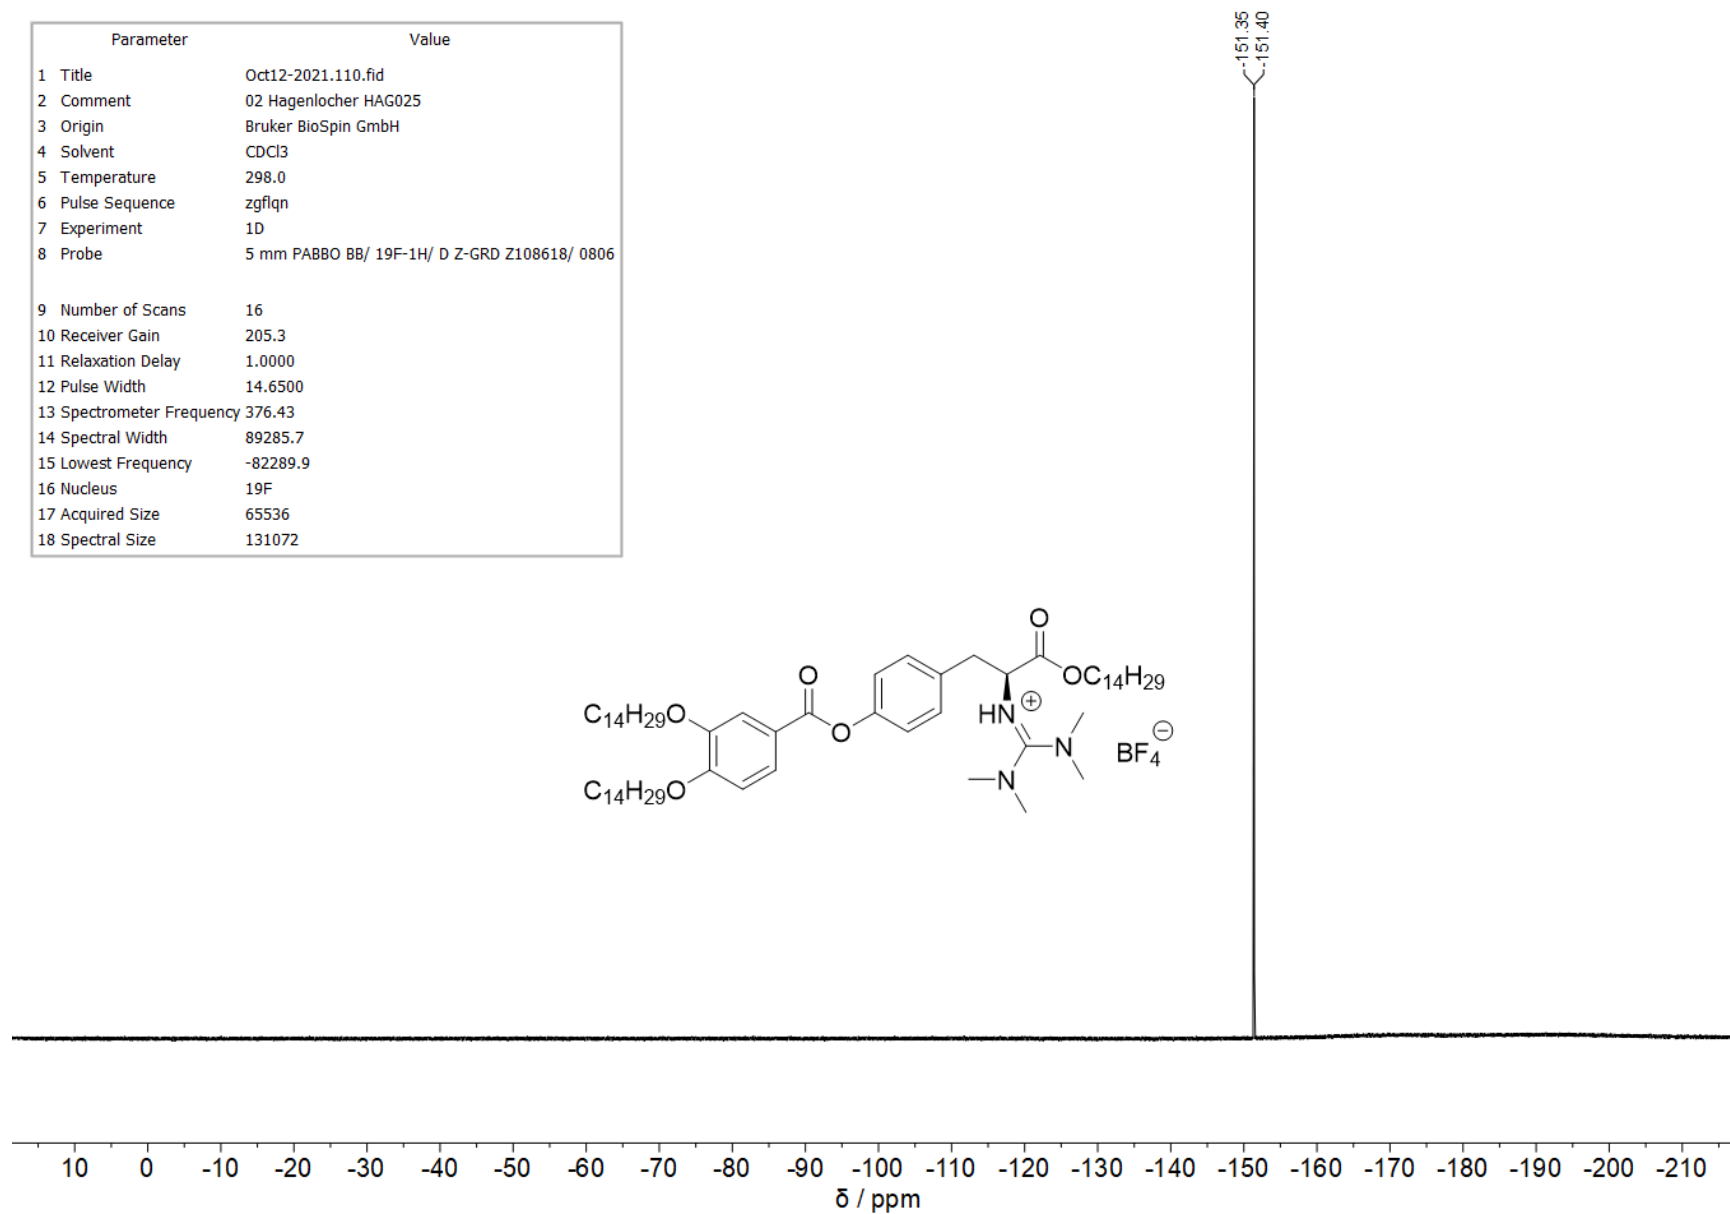

3,4-C<sub>14</sub>TyrC<sub>14</sub>NO<sub>3</sub>

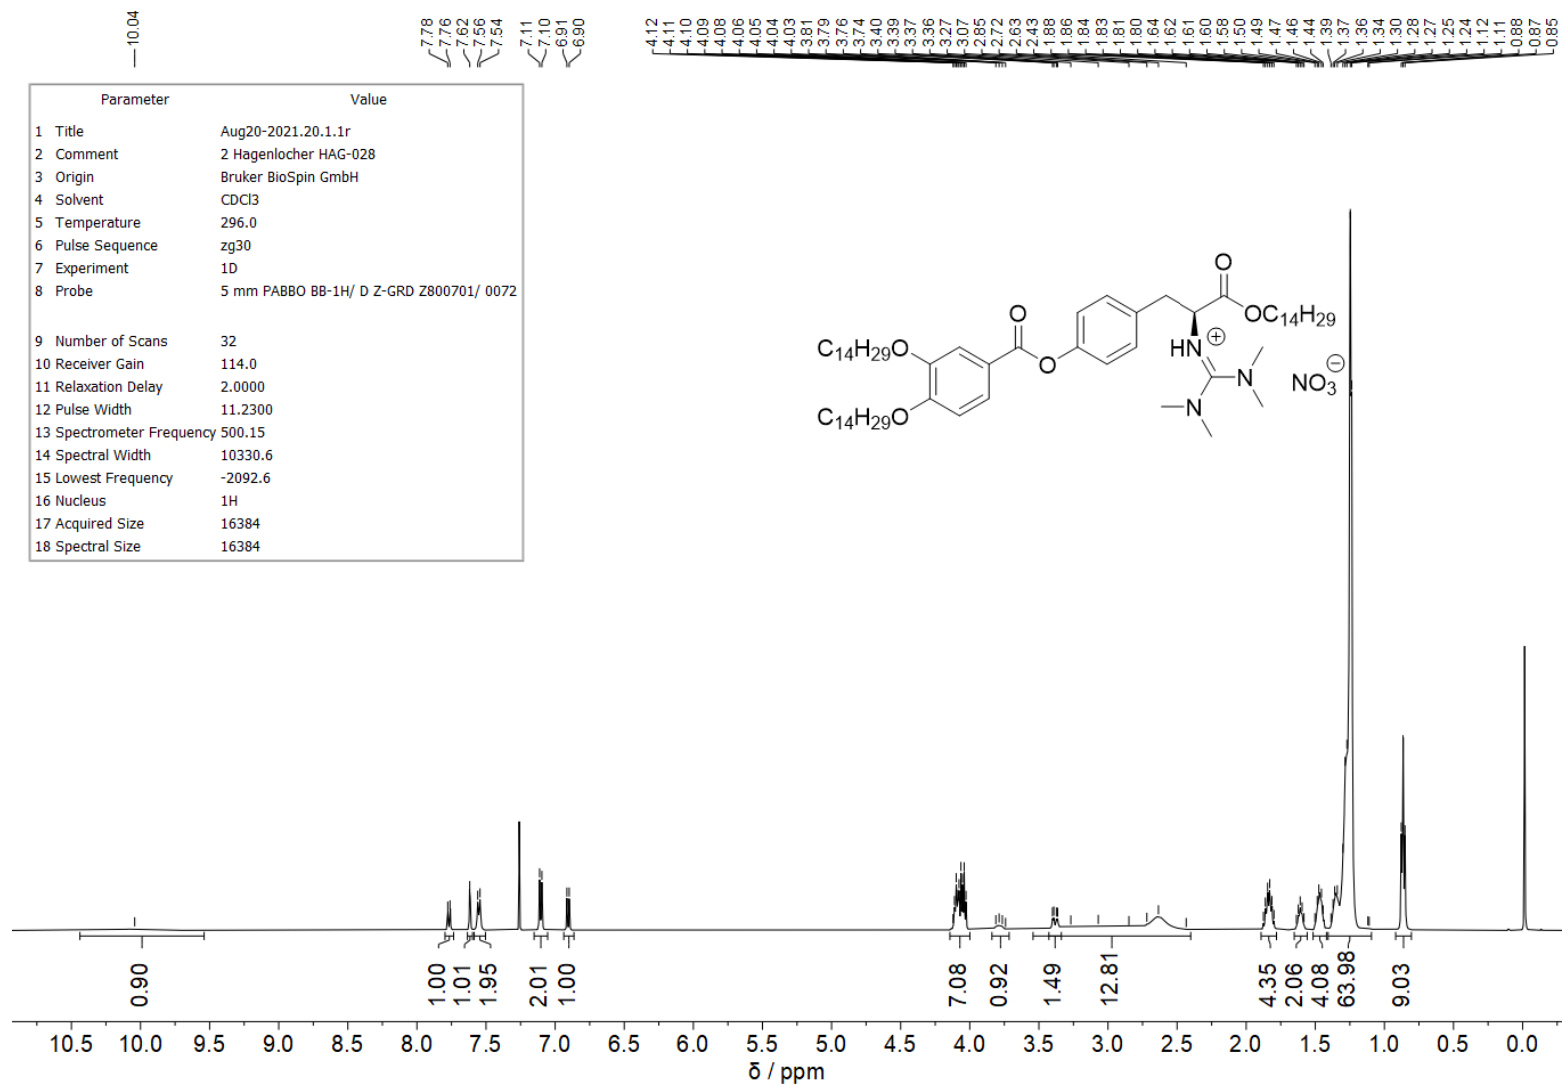

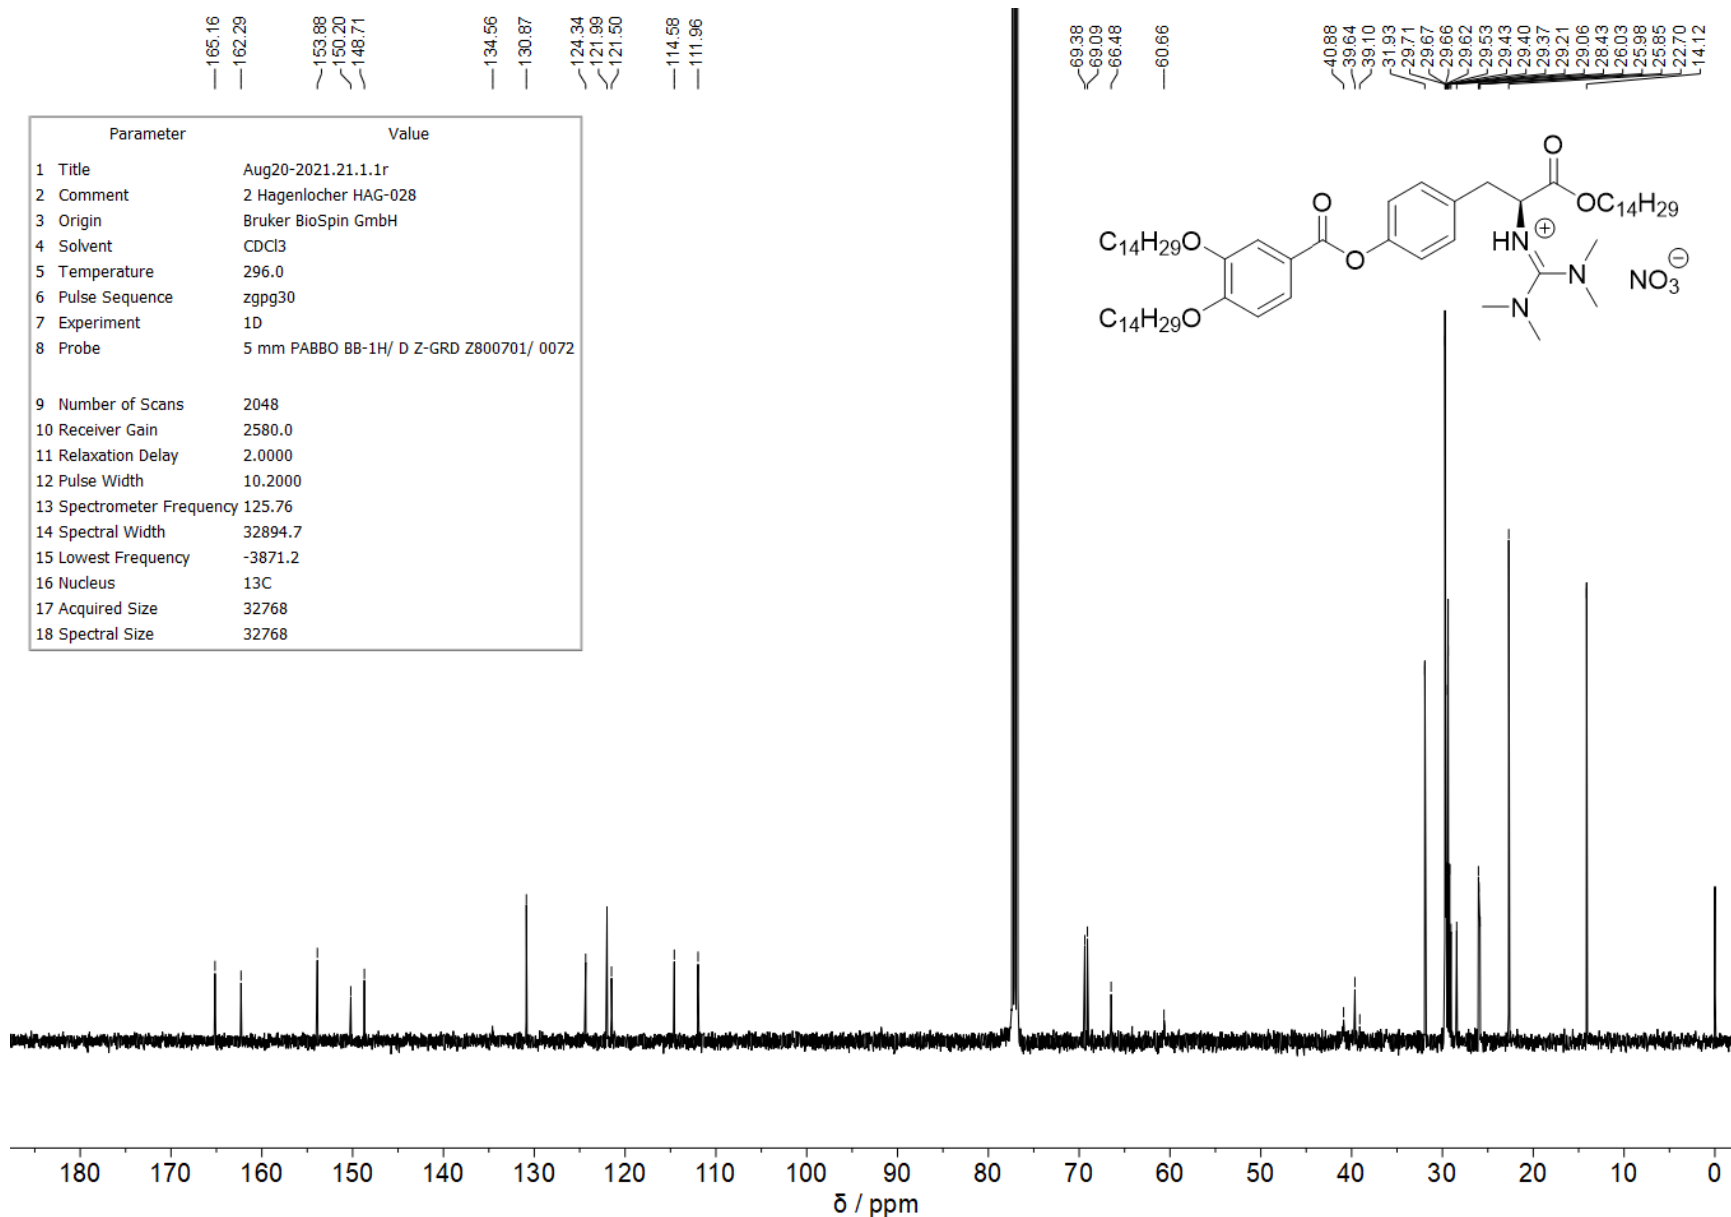

3,5-C<sub>14</sub>TyrC<sub>14</sub>Br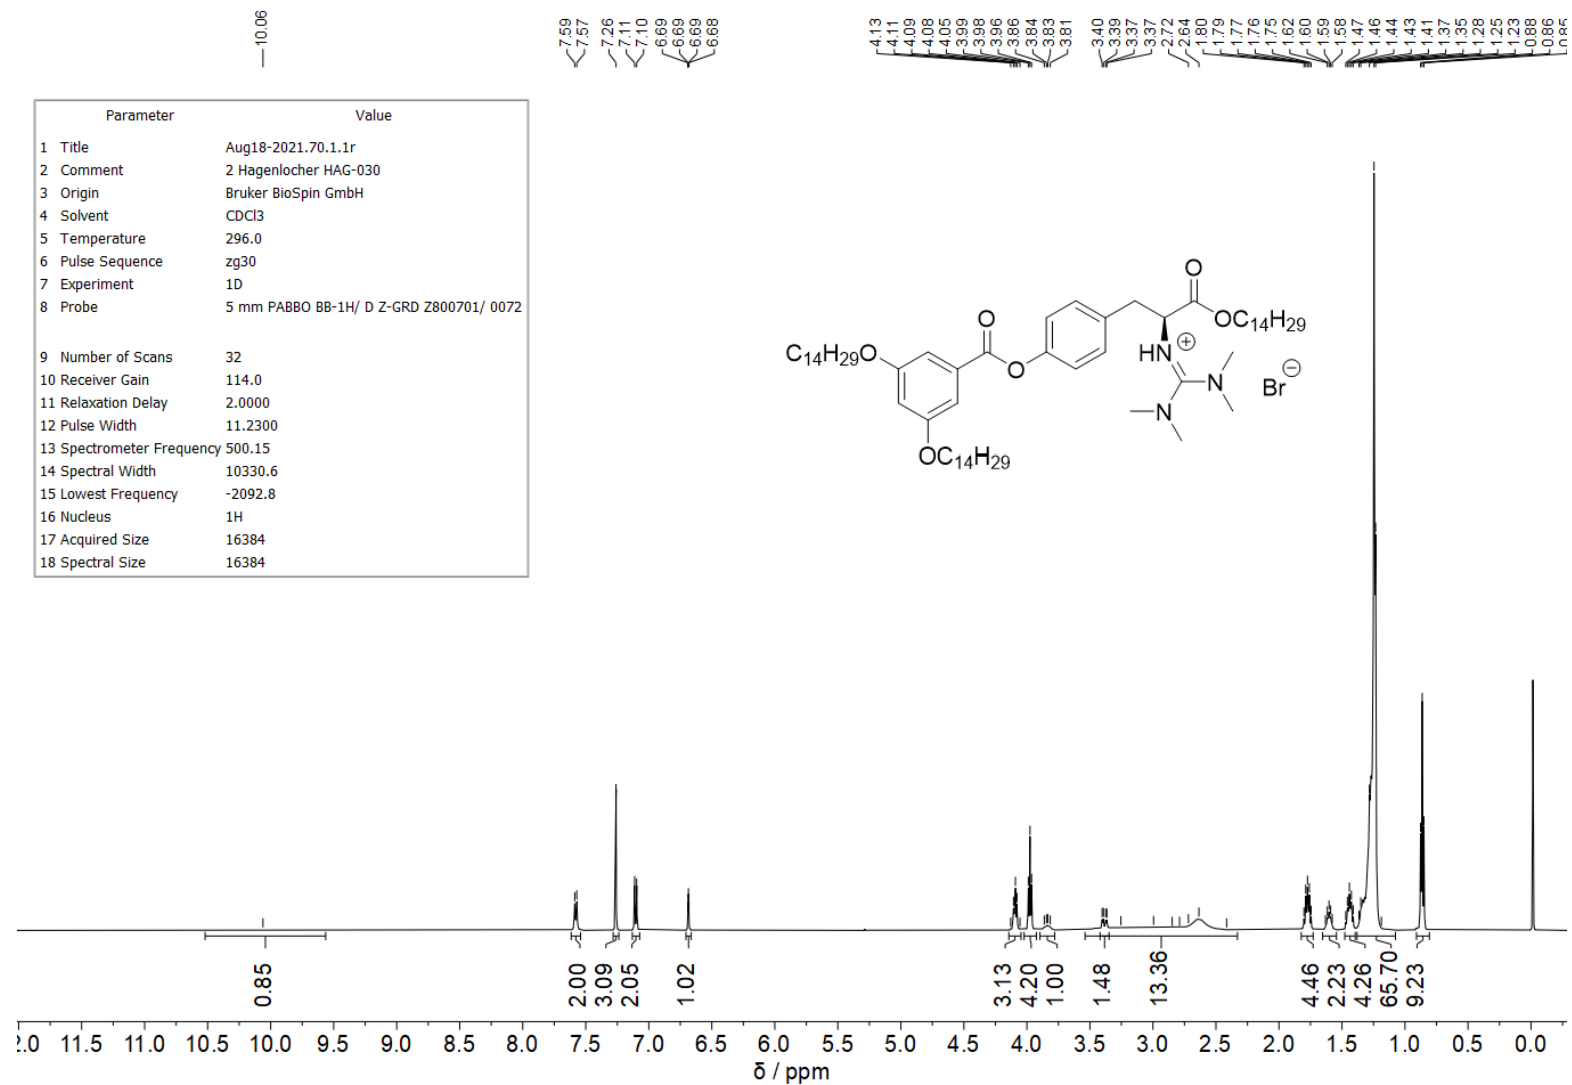



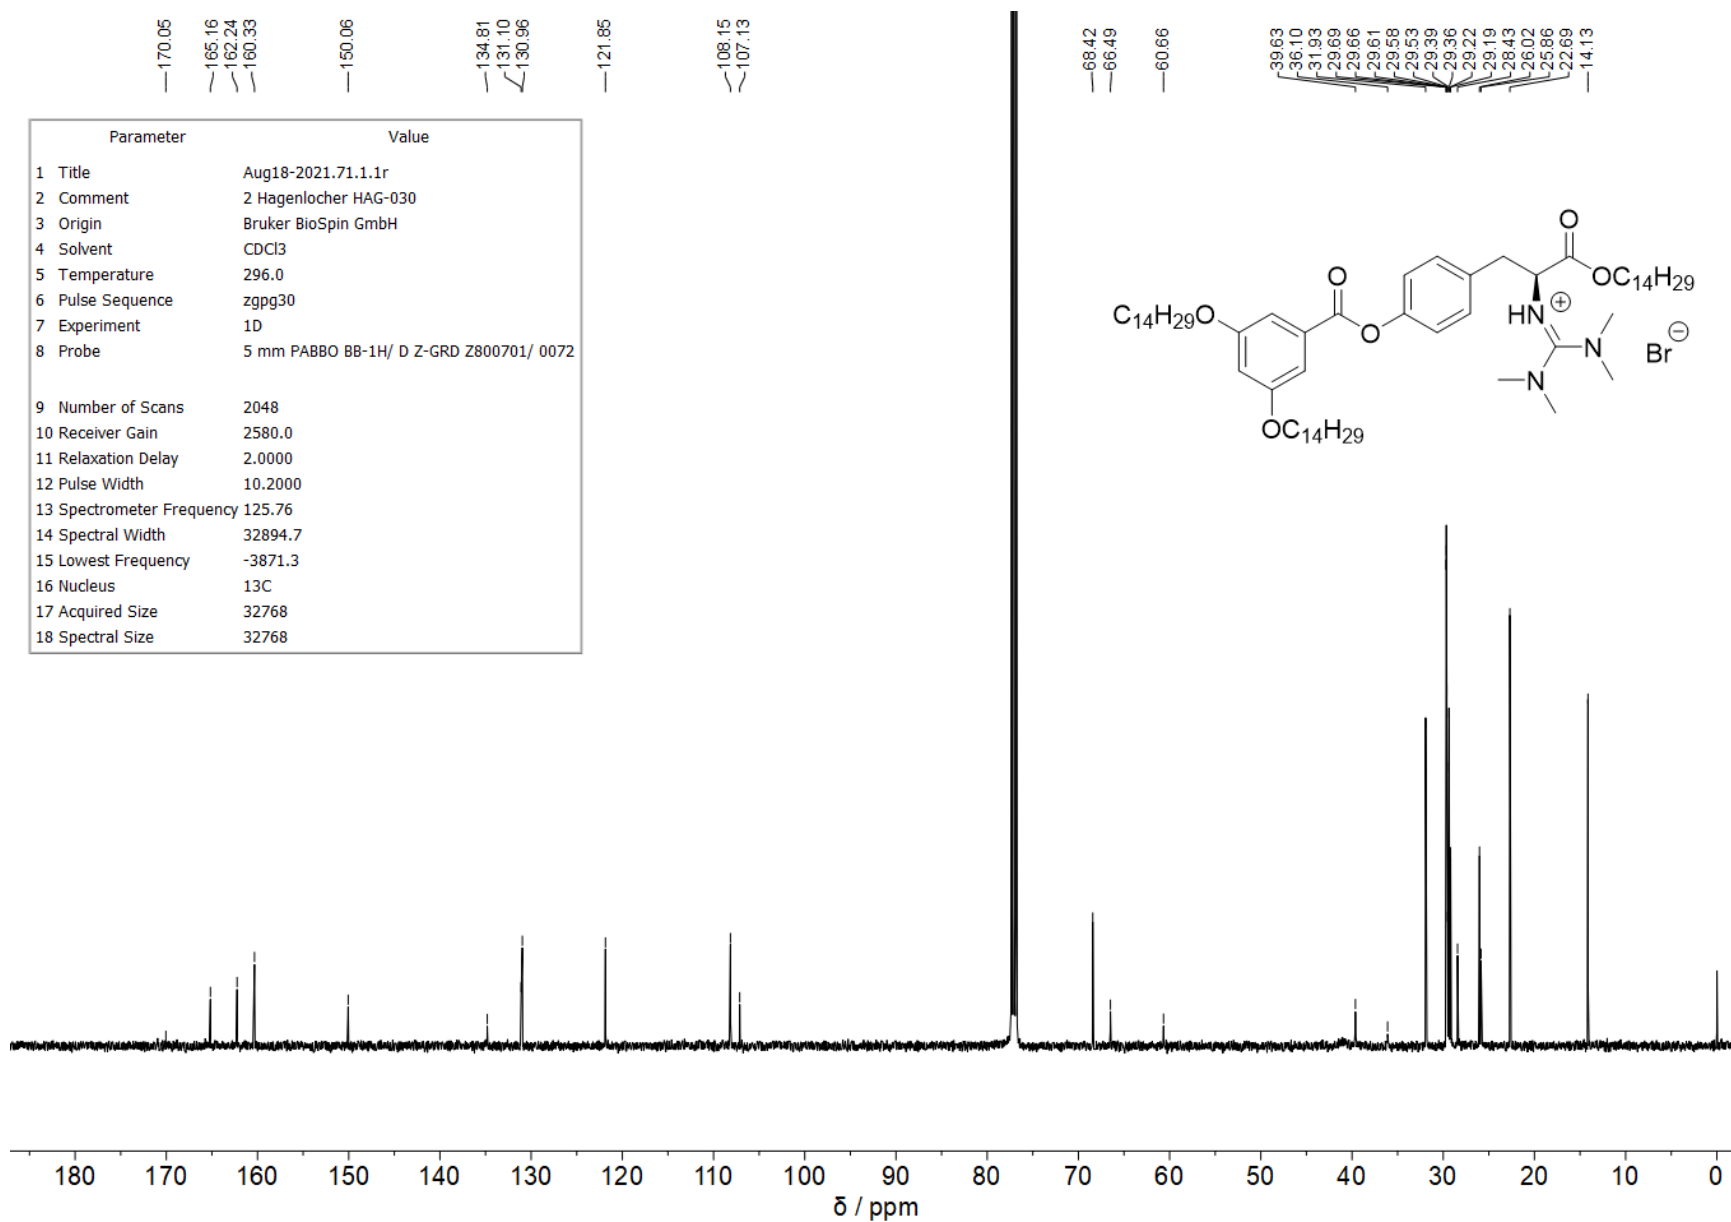

3,5-C<sub>14</sub>TyrC<sub>14</sub>I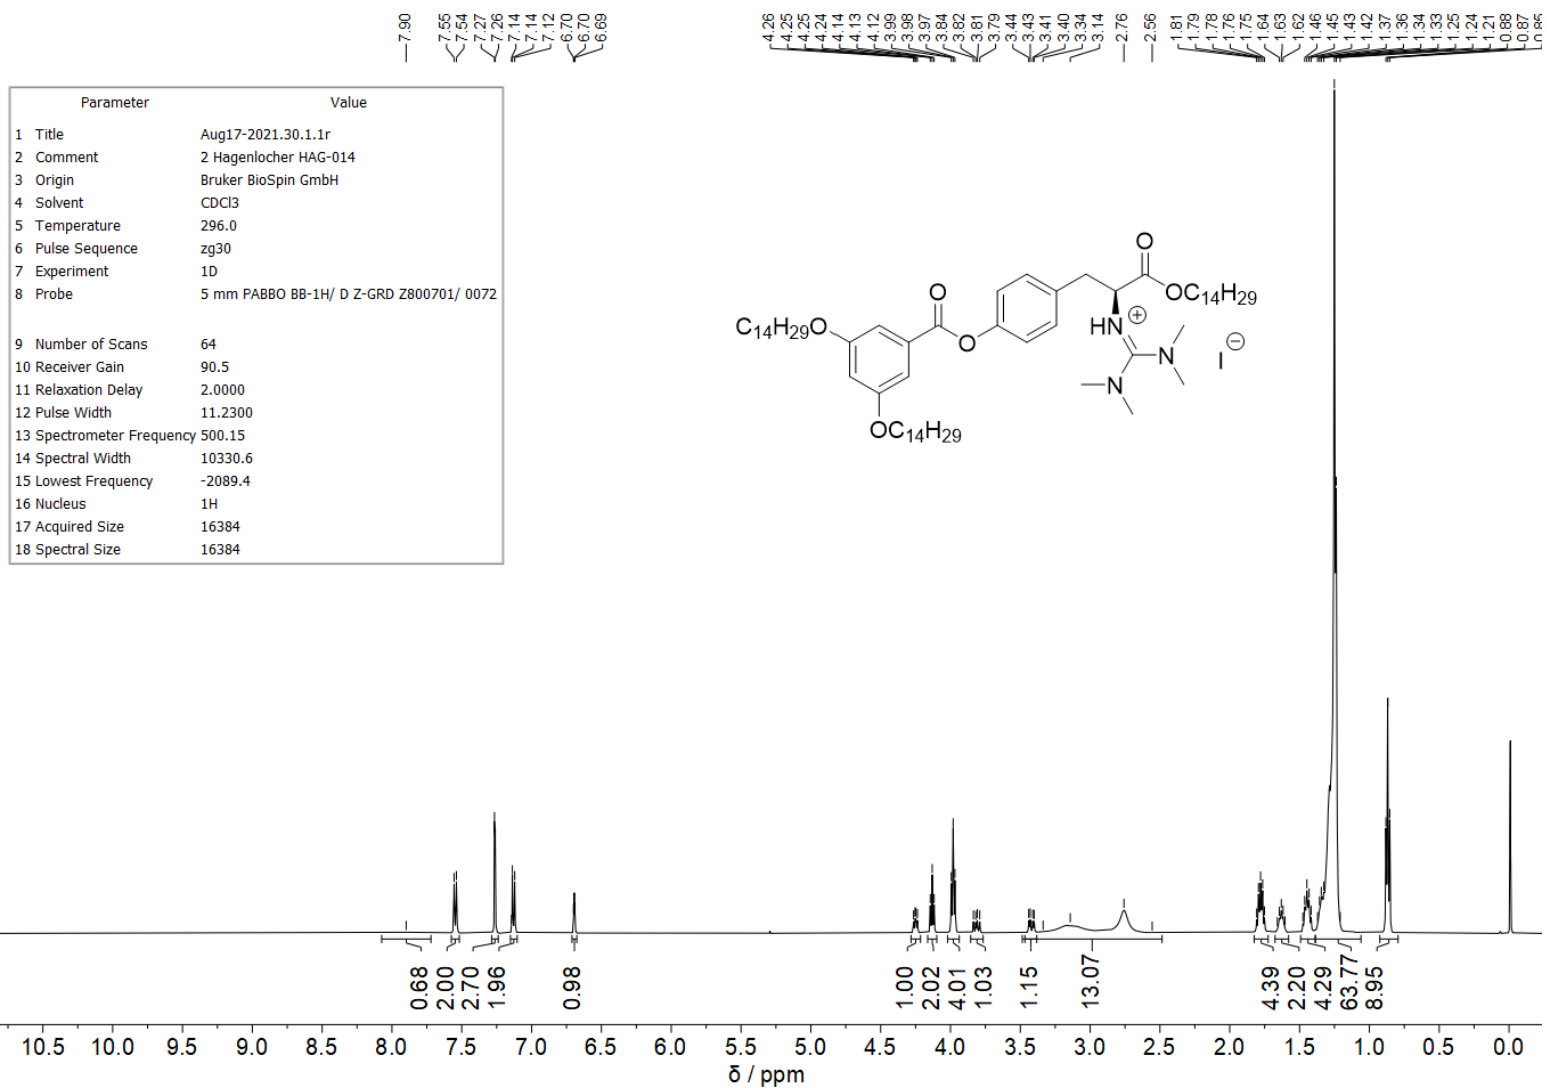

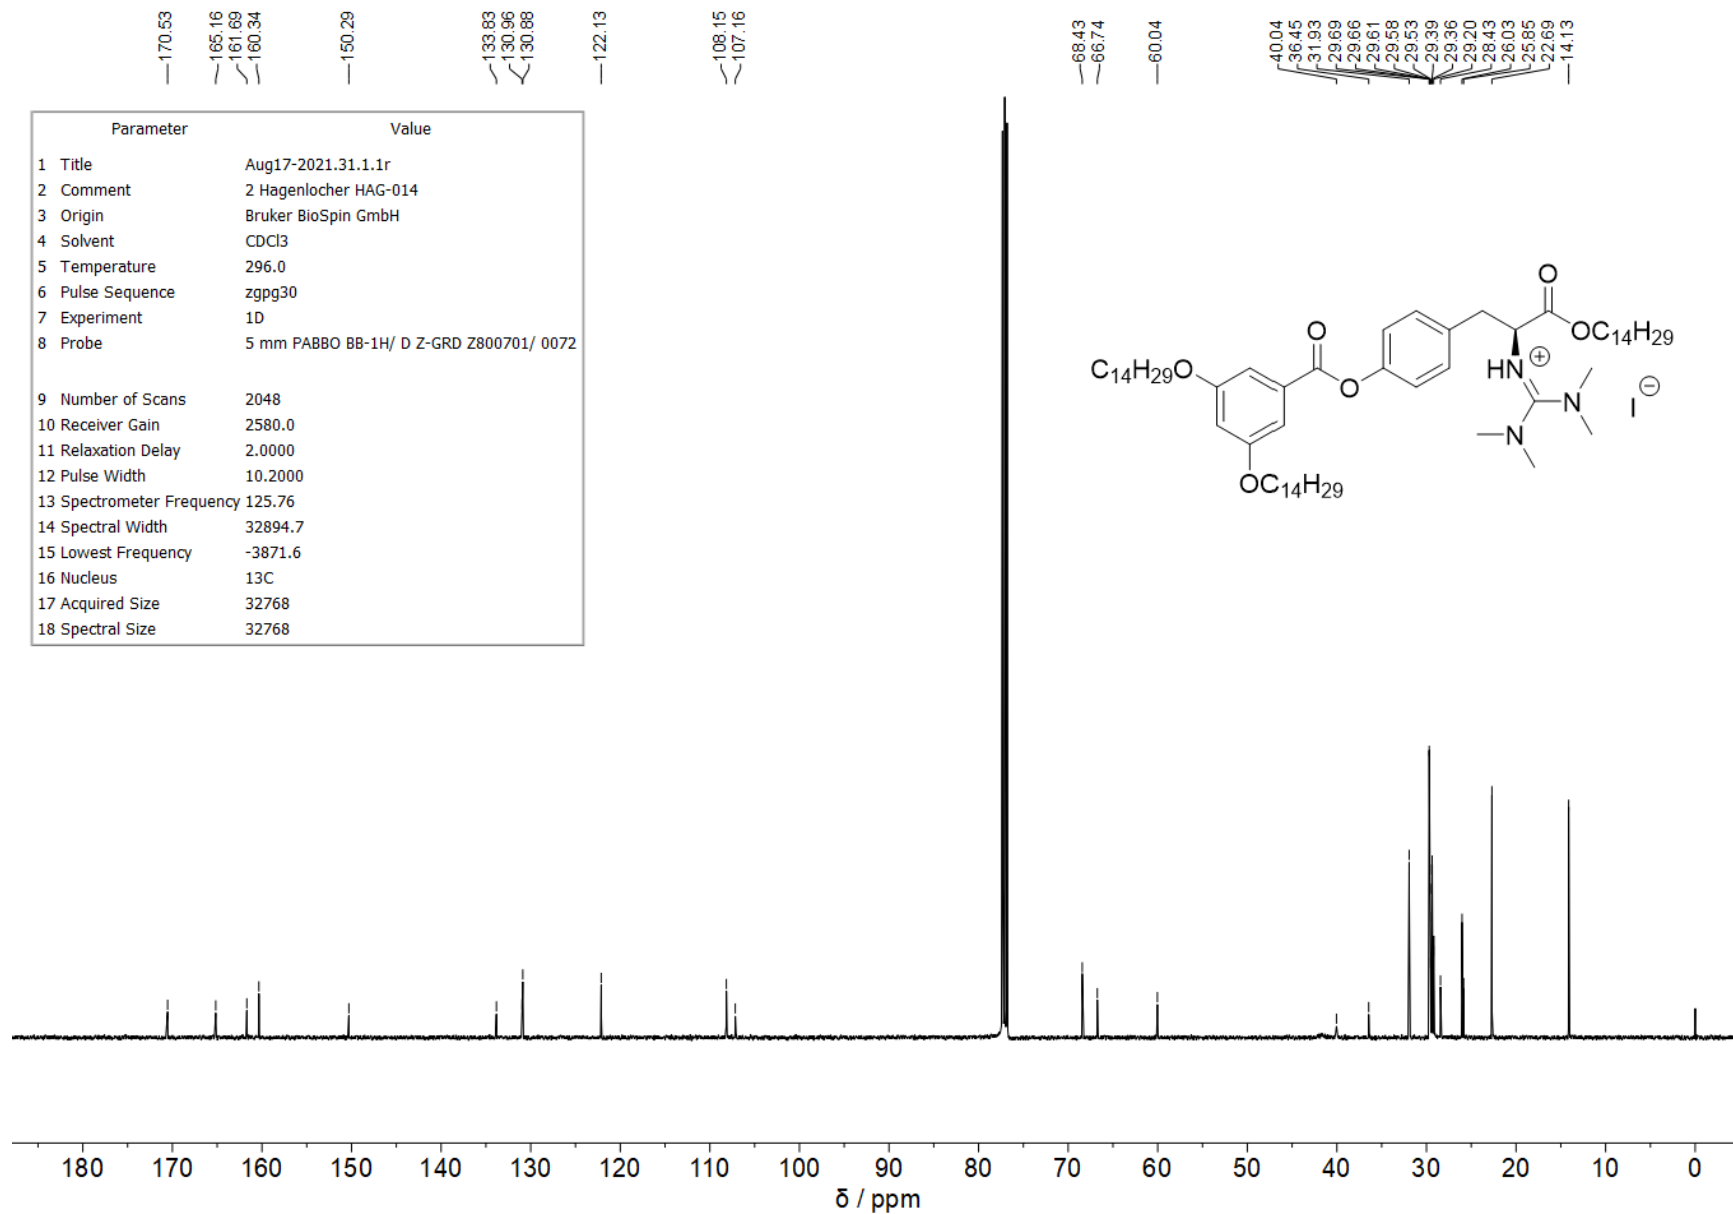

3,5-C<sub>14</sub>TyrC<sub>14</sub>PF<sub>6</sub>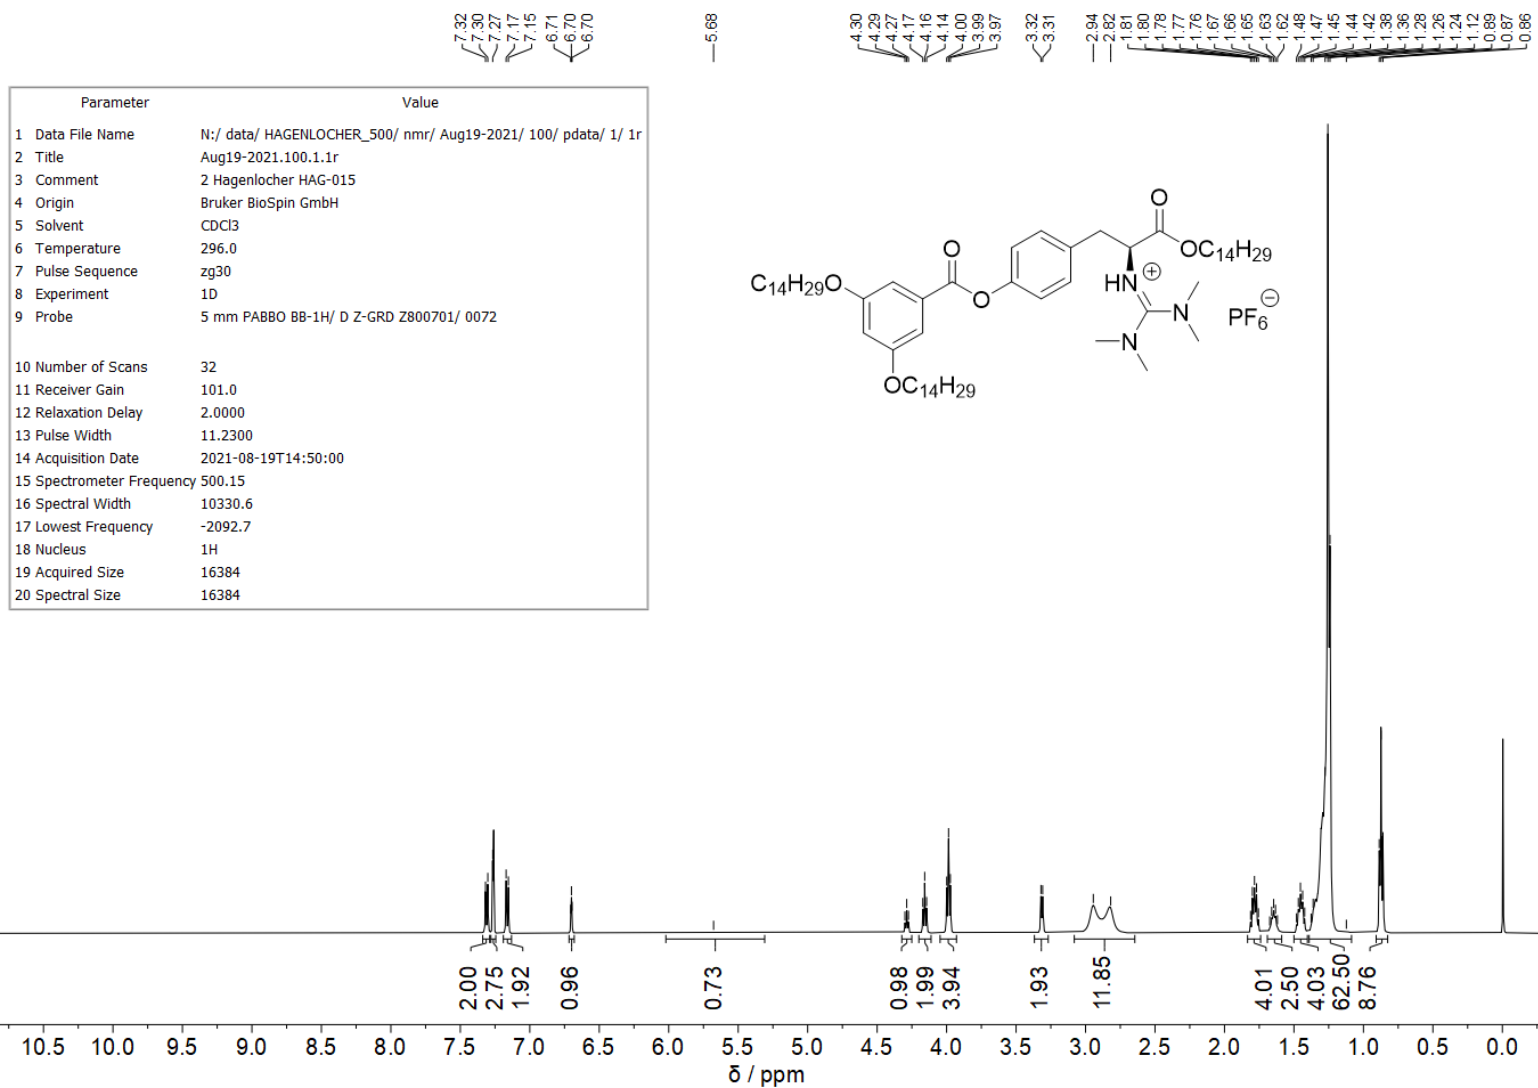

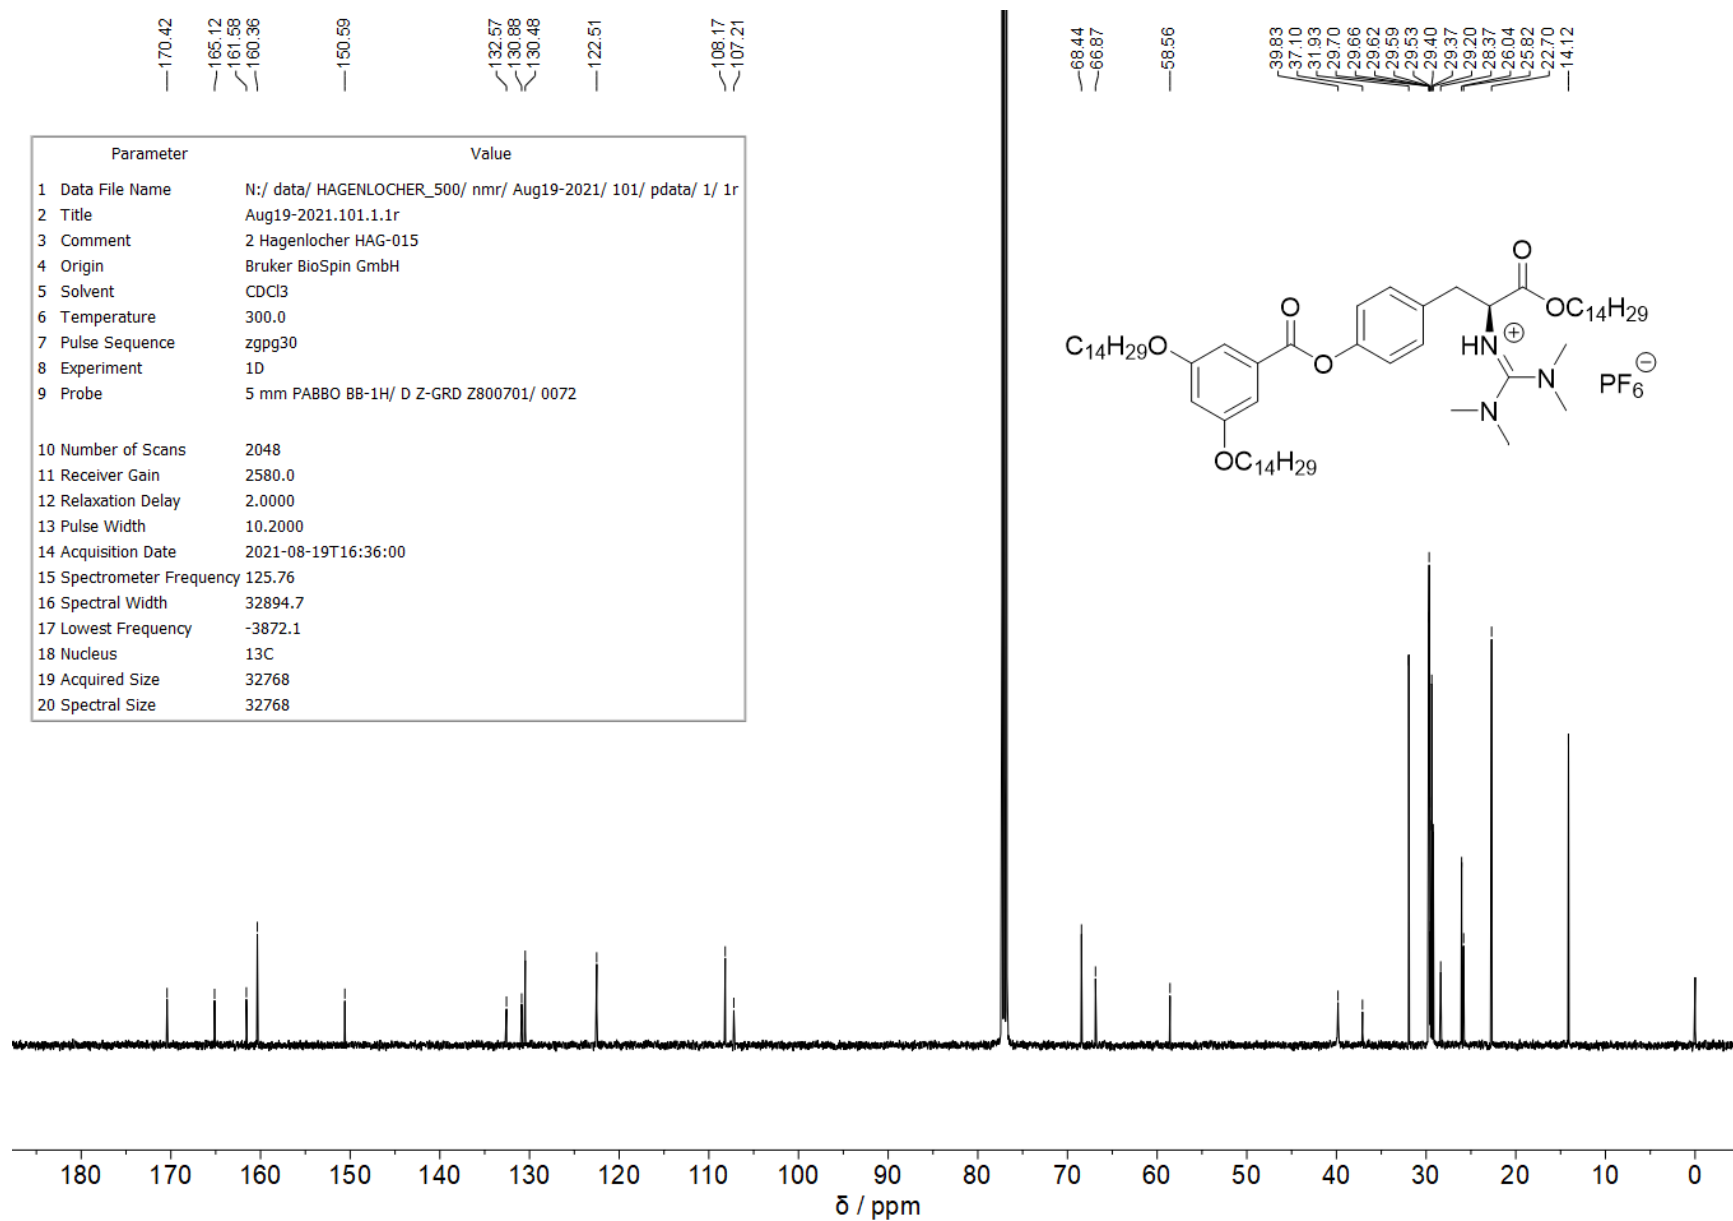

| Parameter                 | Value                                        |
|---------------------------|----------------------------------------------|
| 1 Title                   | Oct12-2021.90.fid                            |
| 2 Comment                 | 02 Hagenlocher HAG015                        |
| 3 Origin                  | Bruker BioSpin GmbH                          |
| 4 Solvent                 | CDCl3                                        |
| 5 Temperature             | 298.0                                        |
| 6 Pulse Sequence          | zgfgqn                                       |
| 7 Experiment              | 1D                                           |
| 8 Probe                   | 5 mm PABBO BB/ 19F-1H/ D Z-GRD Z108618/ 0806 |
| 9 Number of Scans         | 16                                           |
| 10 Receiver Gain          | 205.3                                        |
| 11 Relaxation Delay       | 1.0000                                       |
| 12 Pulse Width            | 14.6500                                      |
| 13 Spectrometer Frequency | 376.43                                       |
| 14 Spectral Width         | 89285.7                                      |
| 15 Lowest Frequency       | -82289.9                                     |
| 16 Nucleus                | 19F                                          |
| 17 Acquired Size          | 65536                                        |
| 18 Spectral Size          | 131072                                       |

-71.52  
-73.41

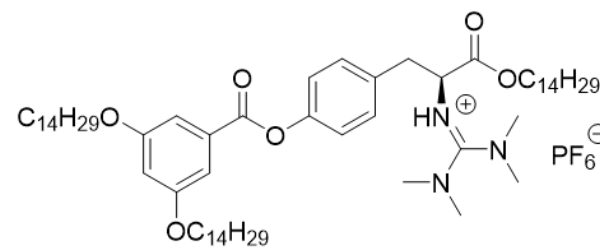

3,5-C<sub>14</sub>TyrC<sub>14</sub>BF<sub>4</sub>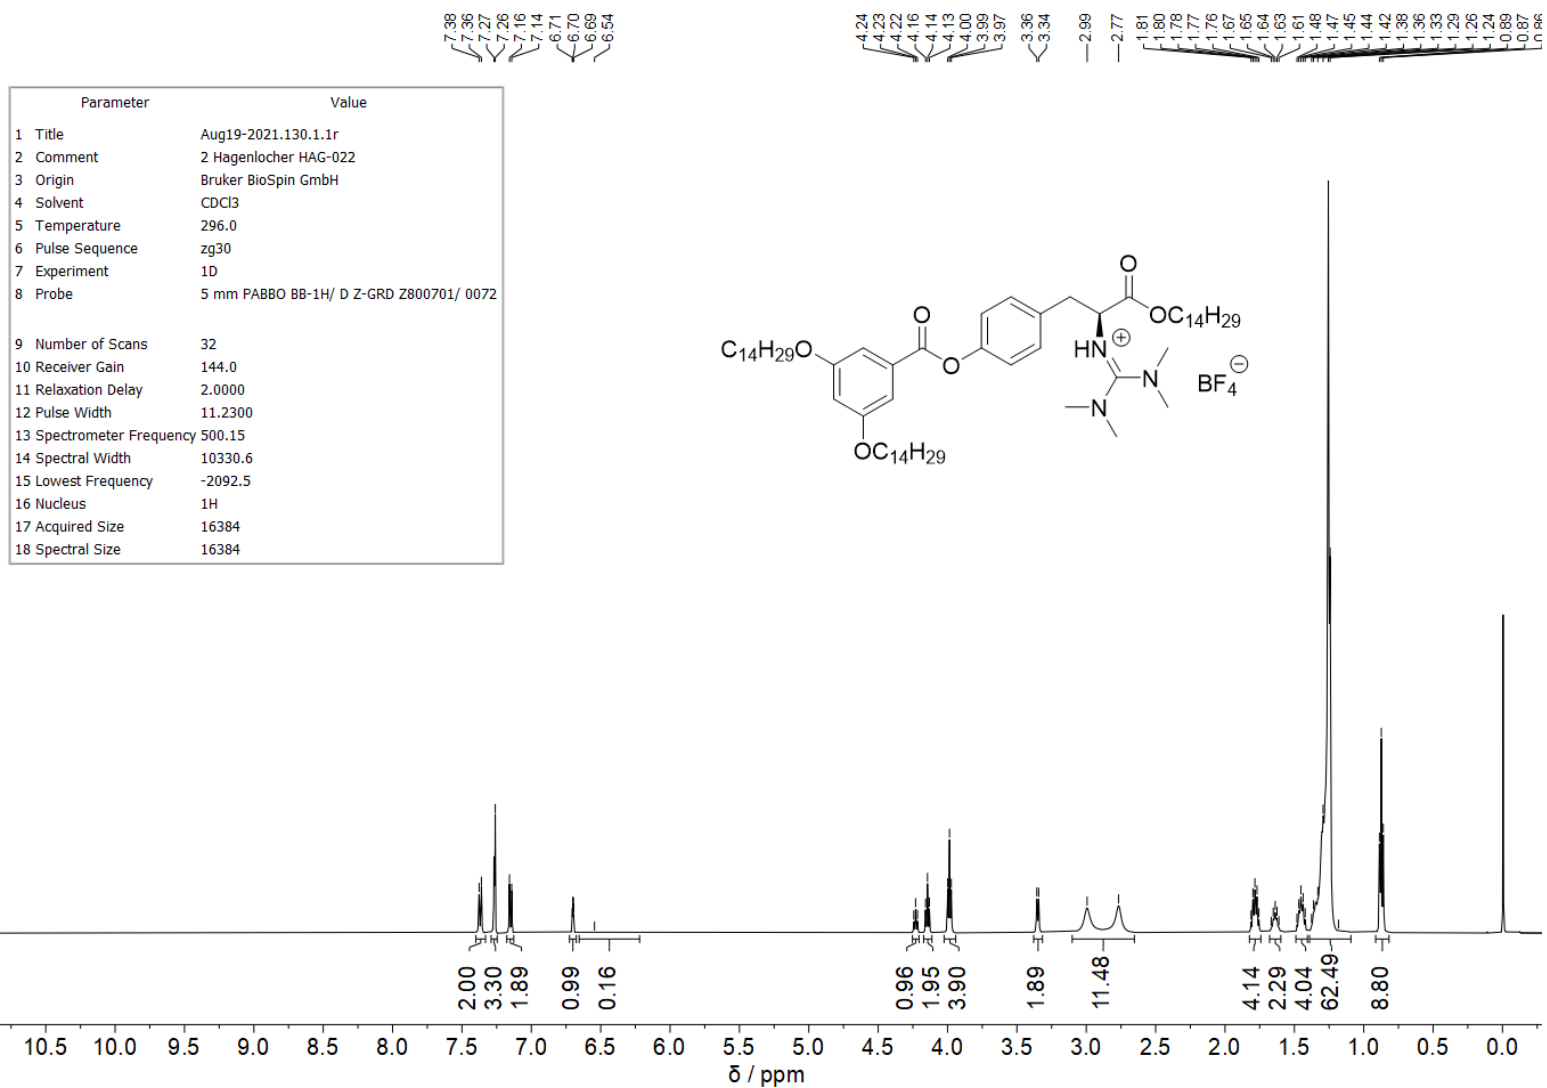

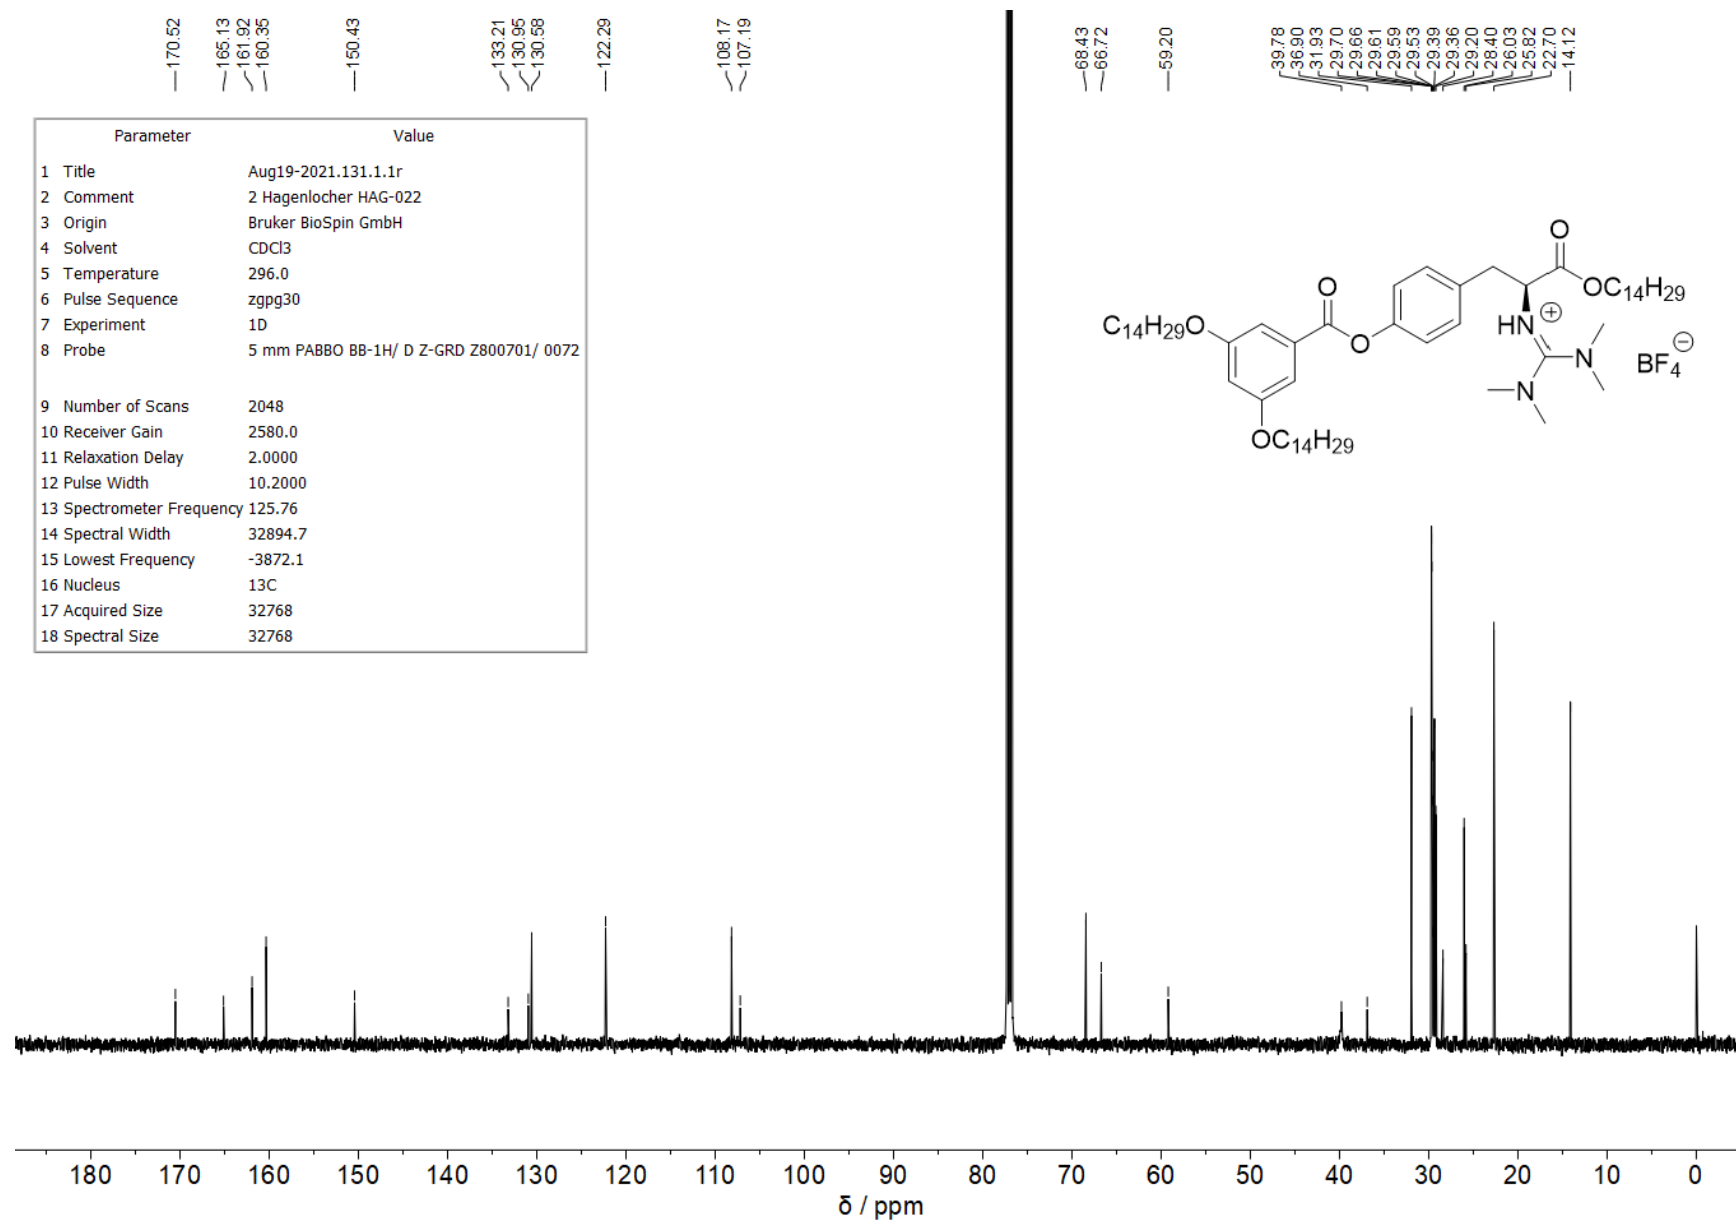



| Parameter                 | Value                                        |
|---------------------------|----------------------------------------------|
| 1 Title                   | Oct12-2021.70.fid                            |
| 2 Comment                 | 02 Hagenlocher HAG022                        |
| 3 Origin                  | Bruker BioSpin GmbH                          |
| 4 Solvent                 | CDCl3                                        |
| 5 Temperature             | 298.0                                        |
| 6 Pulse Sequence          | zgfgqn                                       |
| 7 Experiment              | 1D                                           |
| 8 Probe                   | 5 mm PABBO BB/ 19F-1H/ D Z-GRD Z108618/ 0806 |
| 9 Number of Scans         | 16                                           |
| 10 Receiver Gain          | 205.3                                        |
| 11 Relaxation Delay       | 1.0000                                       |
| 12 Pulse Width            | 14.6500                                      |
| 13 Spectrometer Frequency | 376.43                                       |
| 14 Spectral Width         | 89285.7                                      |
| 15 Lowest Frequency       | -82289.9                                     |
| 16 Nucleus                | 19F                                          |
| 17 Acquired Size          | 65536                                        |
| 18 Spectral Size          | 131072                                       |

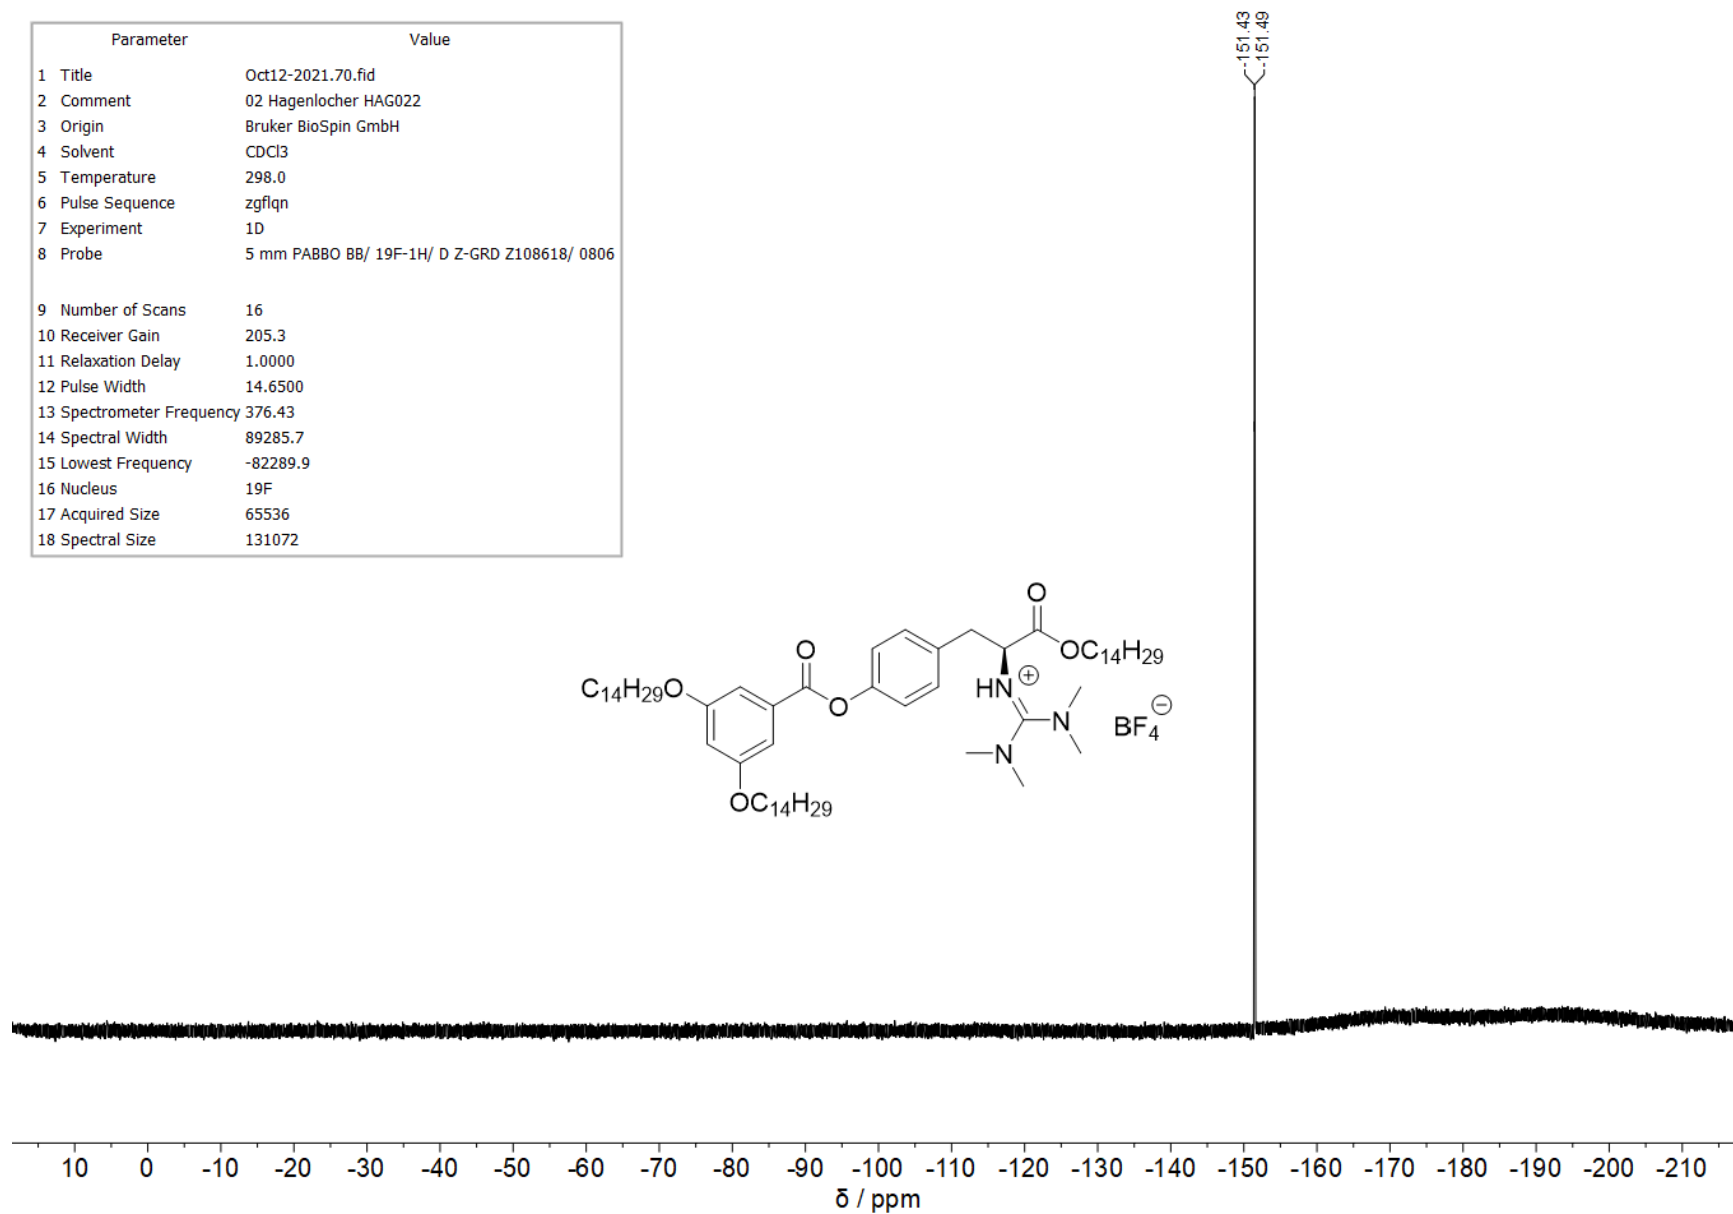

3,5-C<sub>14</sub>TyrC<sub>14</sub>NO<sub>3</sub>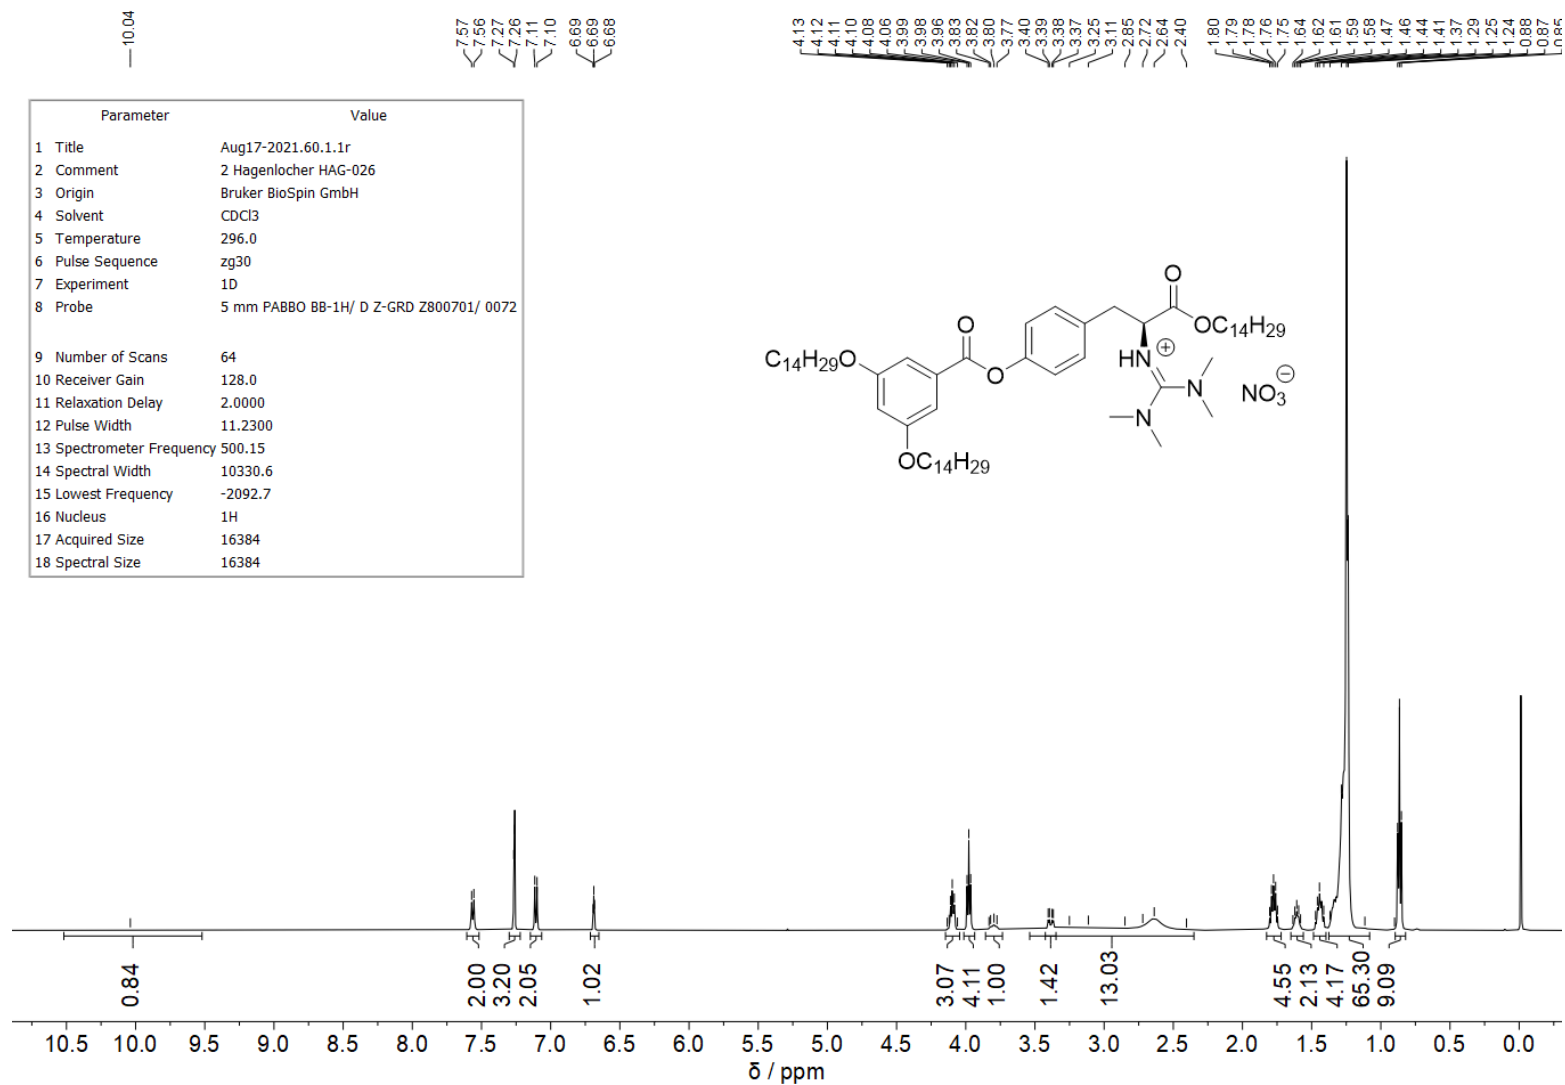

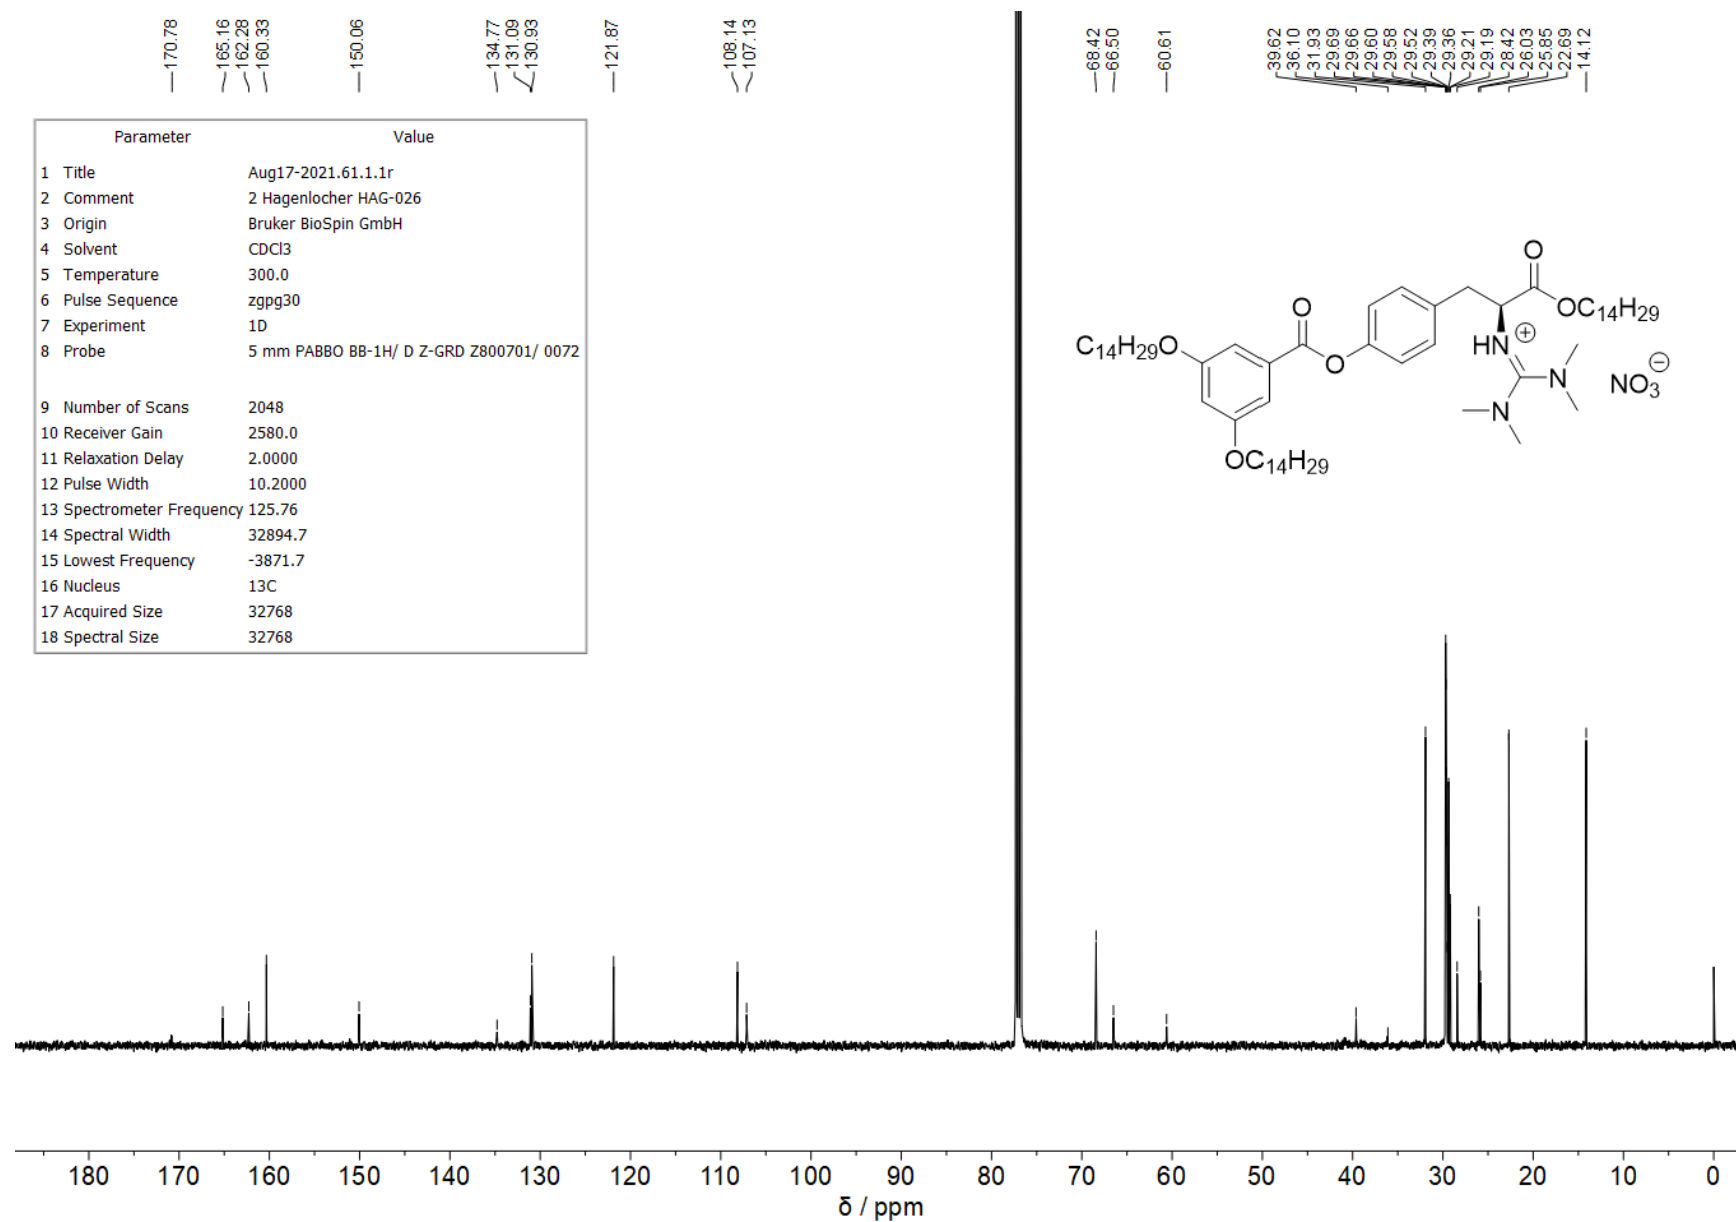

## BnSerC14Boc

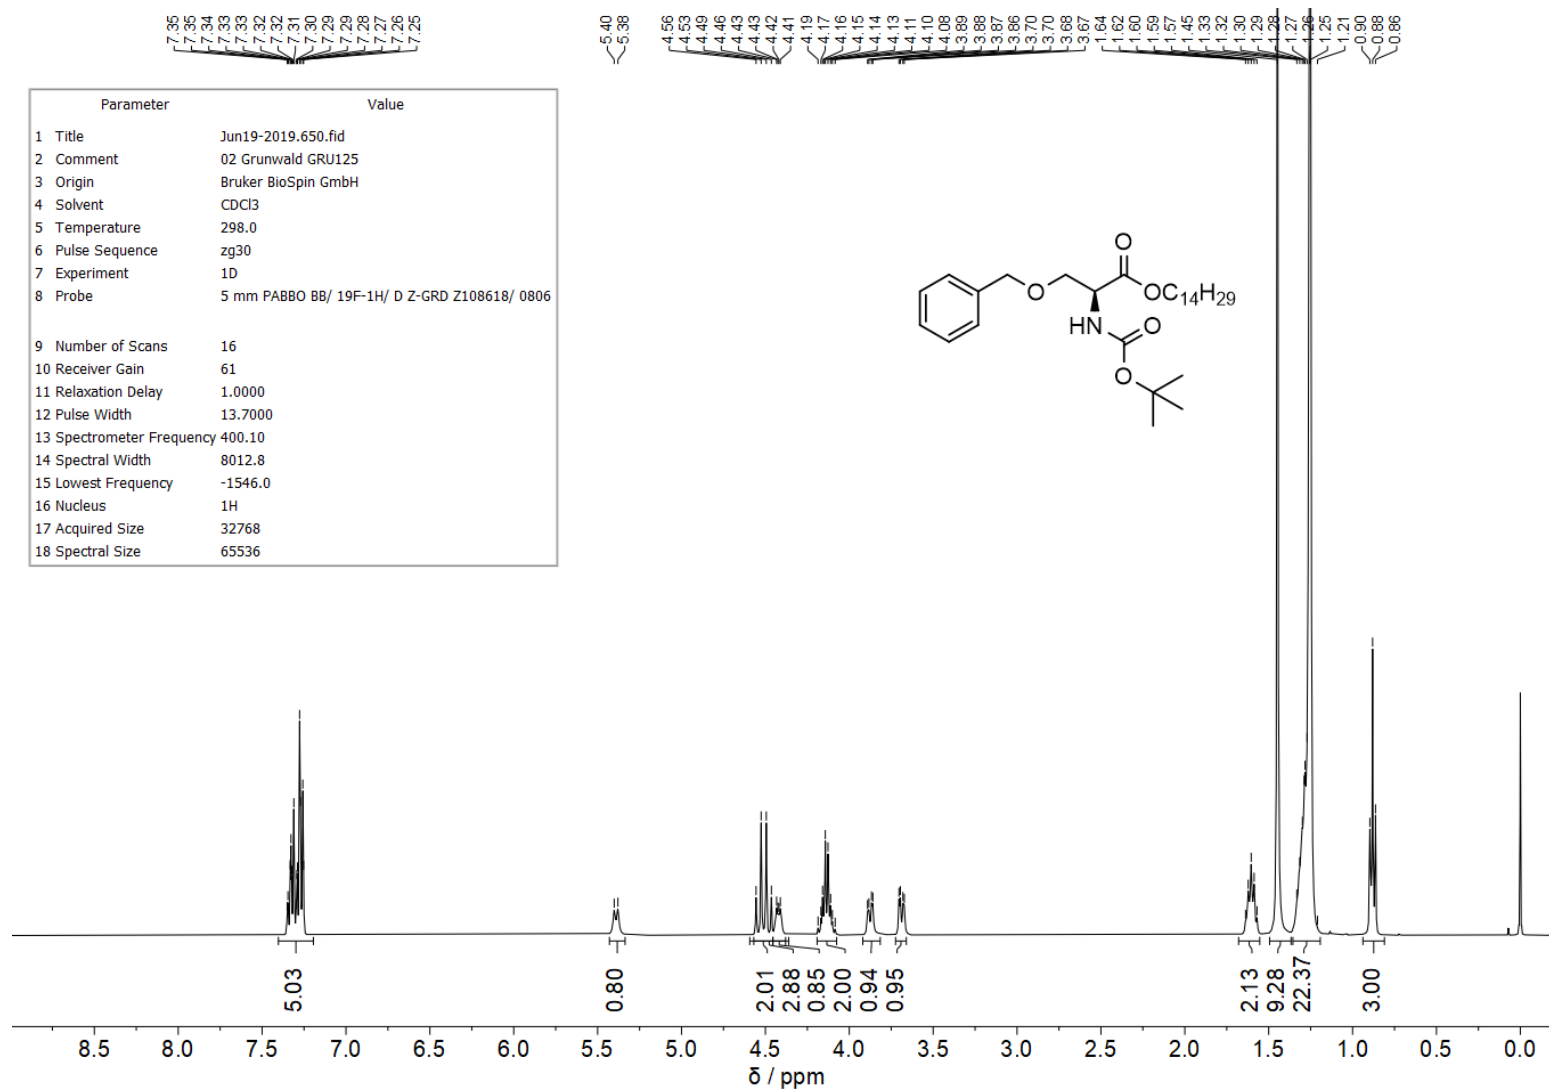

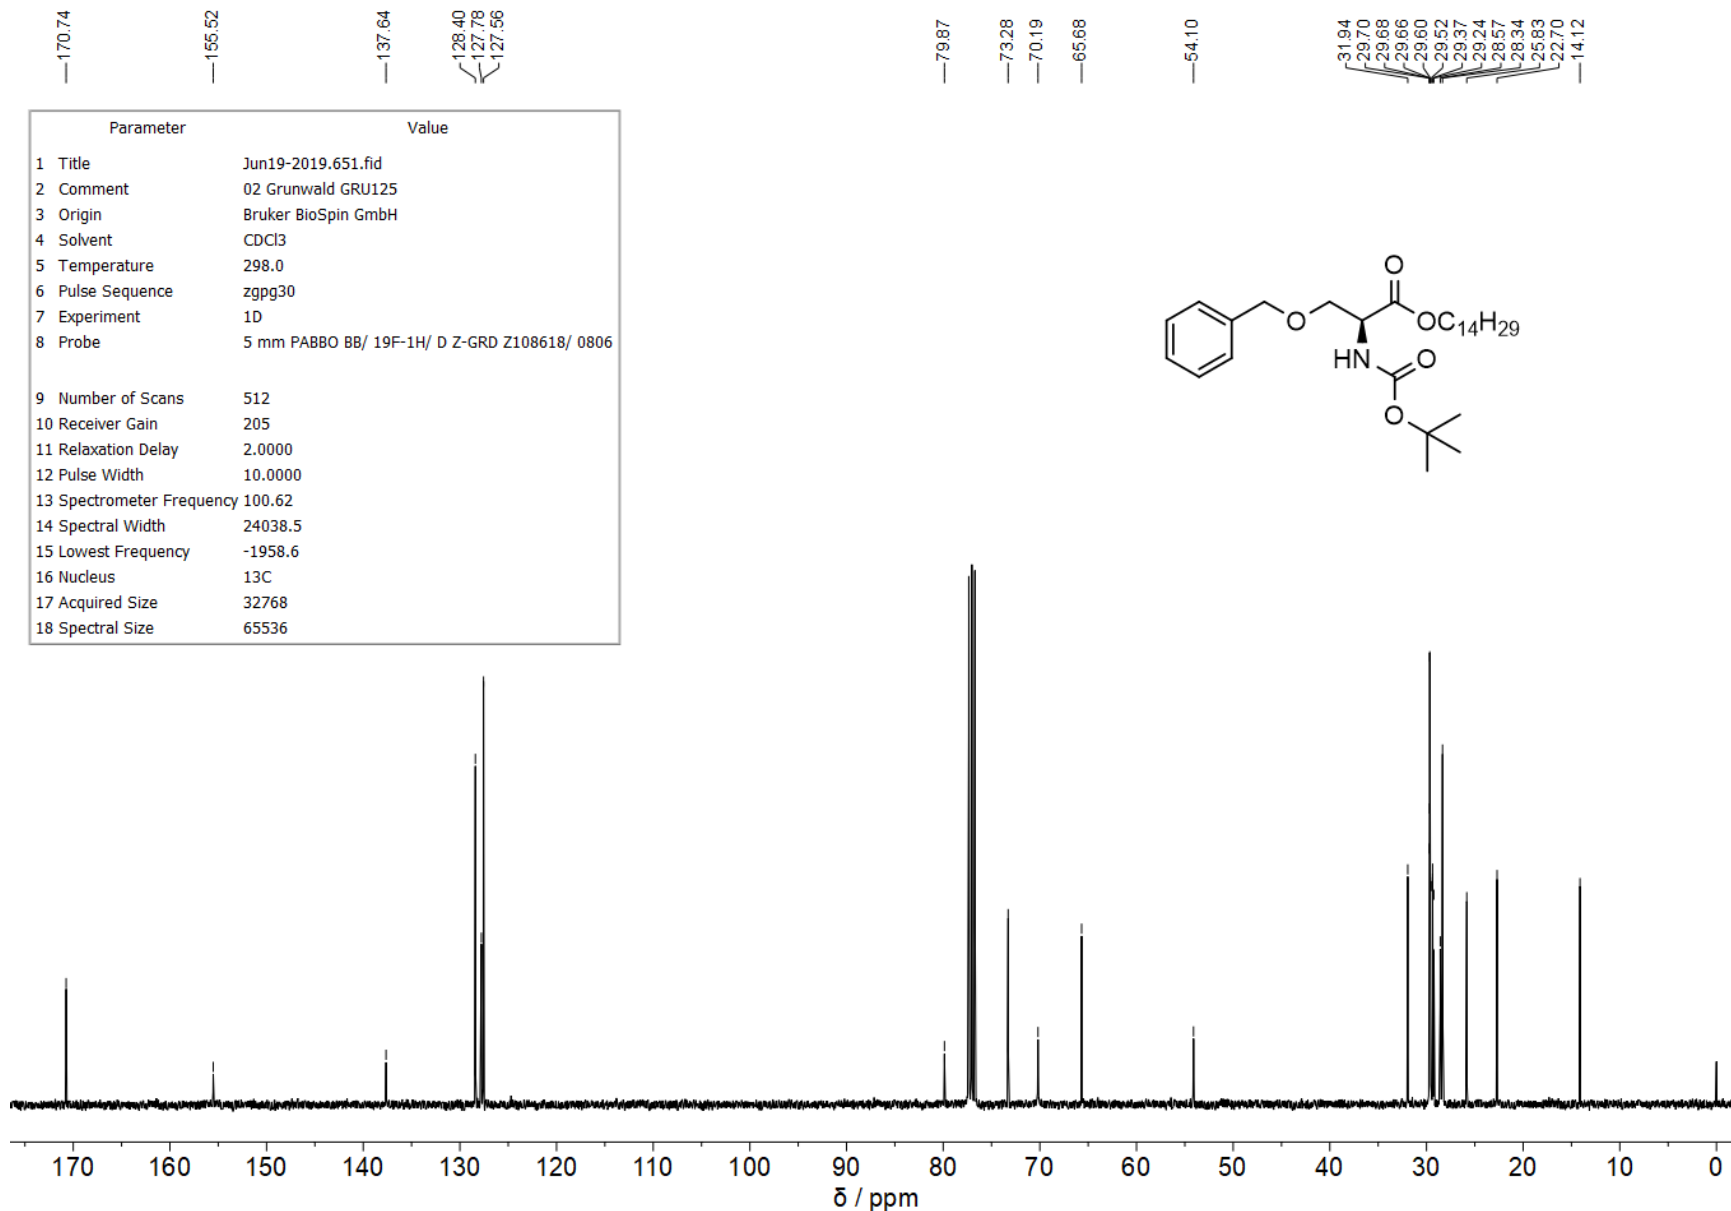

## SerC14Boc

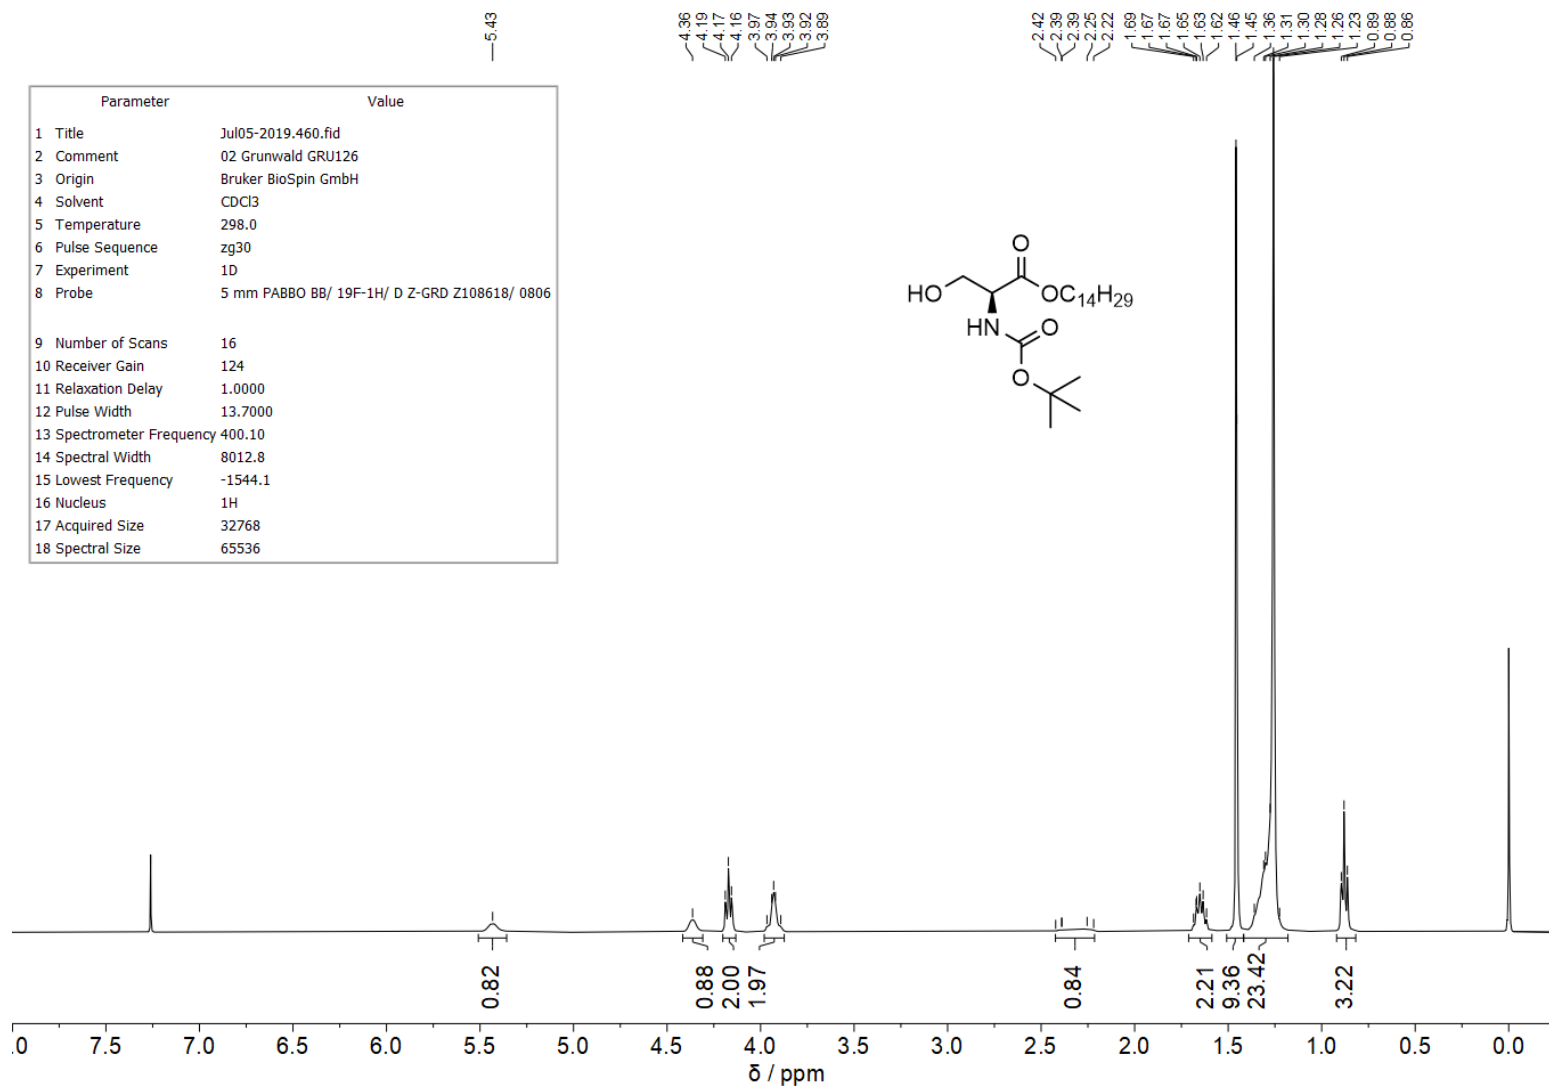

| Parameter                 | Value                                        |
|---------------------------|----------------------------------------------|
| 1 Title                   | Jul05-2019.461.fid                           |
| 2 Comment                 | 02 Grunwald GRU126                           |
| 3 Origin                  | Bruker BioSpin GmbH                          |
| 4 Solvent                 | CDCl3                                        |
| 5 Temperature             | 298.0                                        |
| 6 Pulse Sequence          | zgpg30                                       |
| 7 Experiment              | 1D                                           |
| 8 Probe                   | 5 mm PABBO BB/ 19F-1H/ D Z-GRD Z108618/ 0806 |
| 9 Number of Scans         | 512                                          |
| 10 Receiver Gain          | 205                                          |
| 11 Relaxation Delay       | 2.0000                                       |
| 12 Pulse Width            | 10.0000                                      |
| 13 Spectrometer Frequency | 100.62                                       |
| 14 Spectral Width         | 24038.5                                      |
| 15 Lowest Frequency       | -1957.9                                      |
| 16 Nucleus                | 13C                                          |
| 17 Acquired Size          | 32768                                        |
| 18 Spectral Size          | 65536                                        |

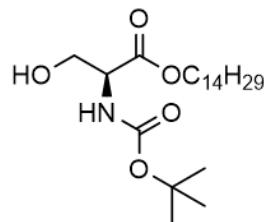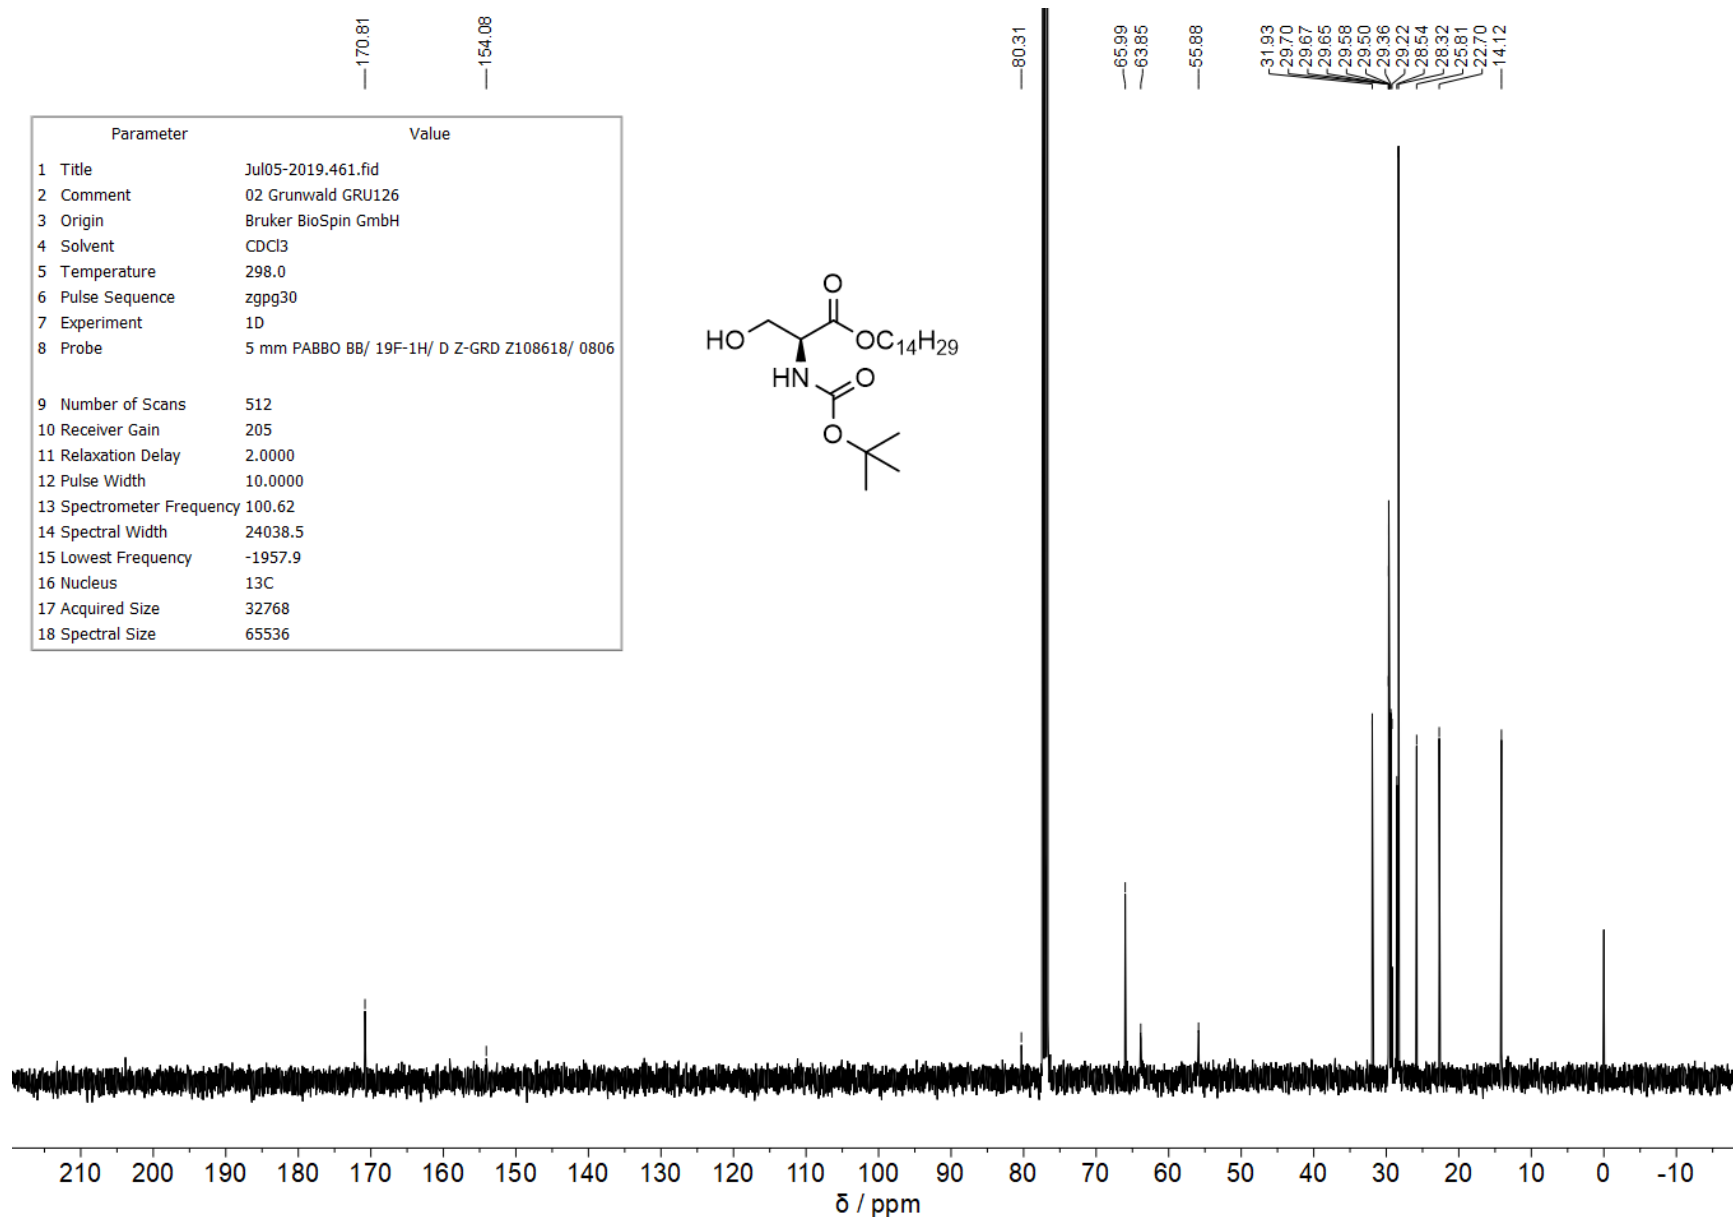

## BzSerC14Boc

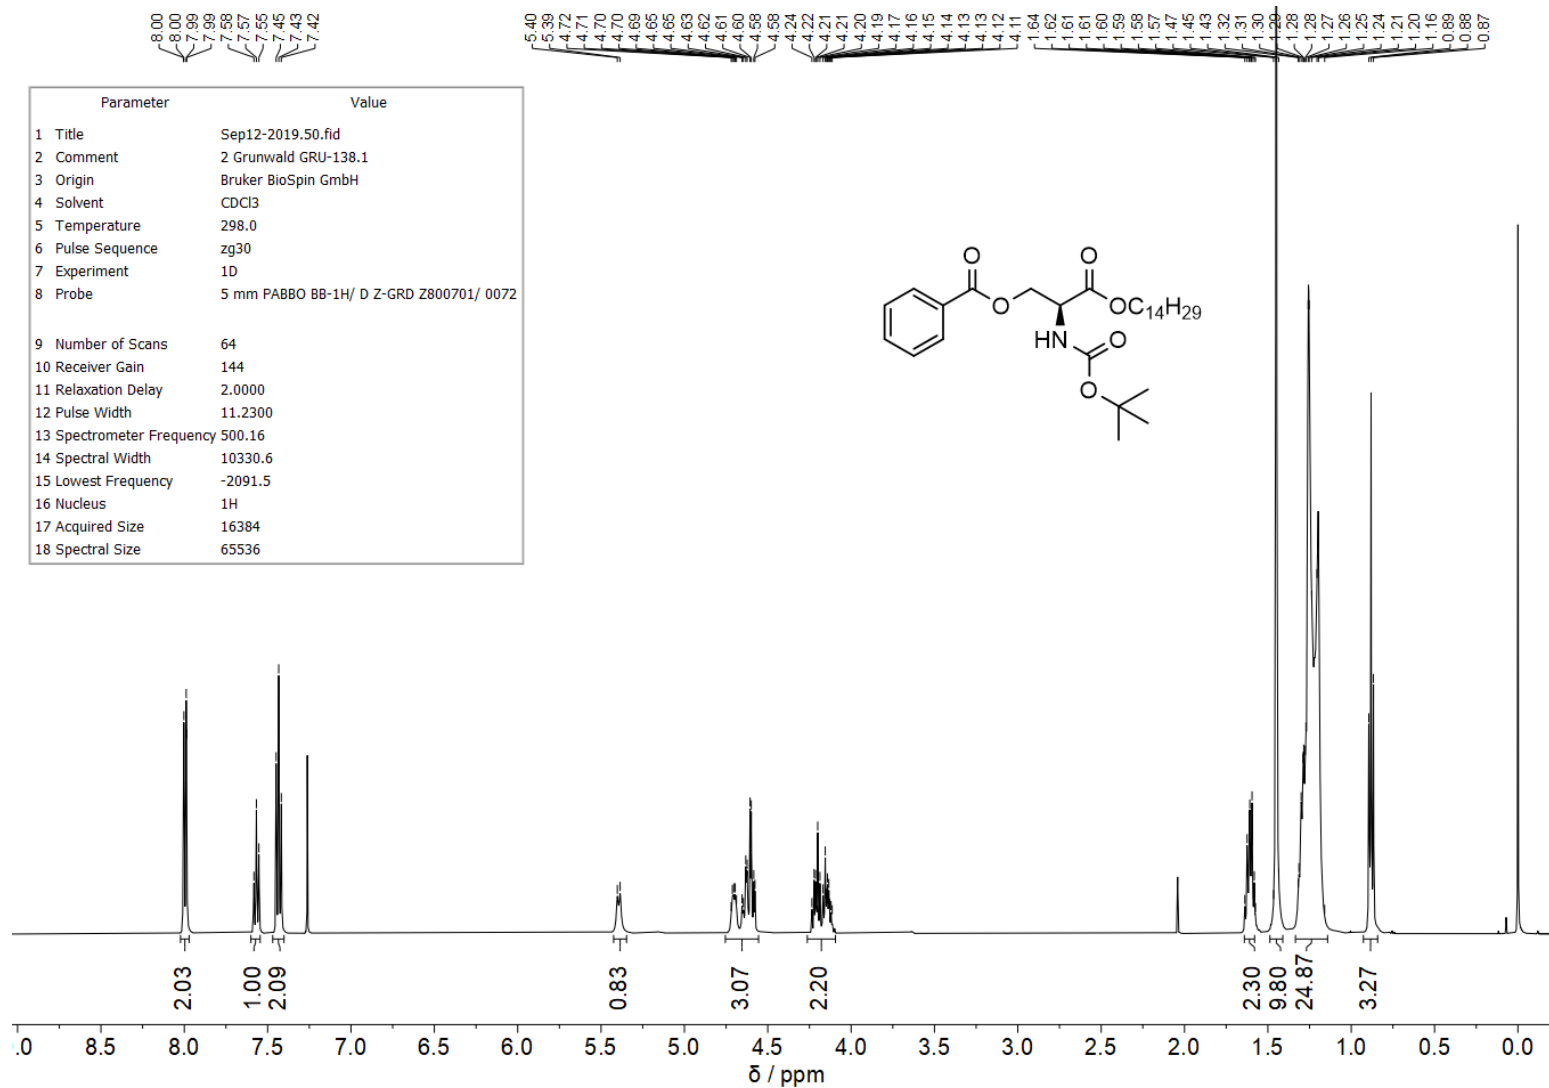



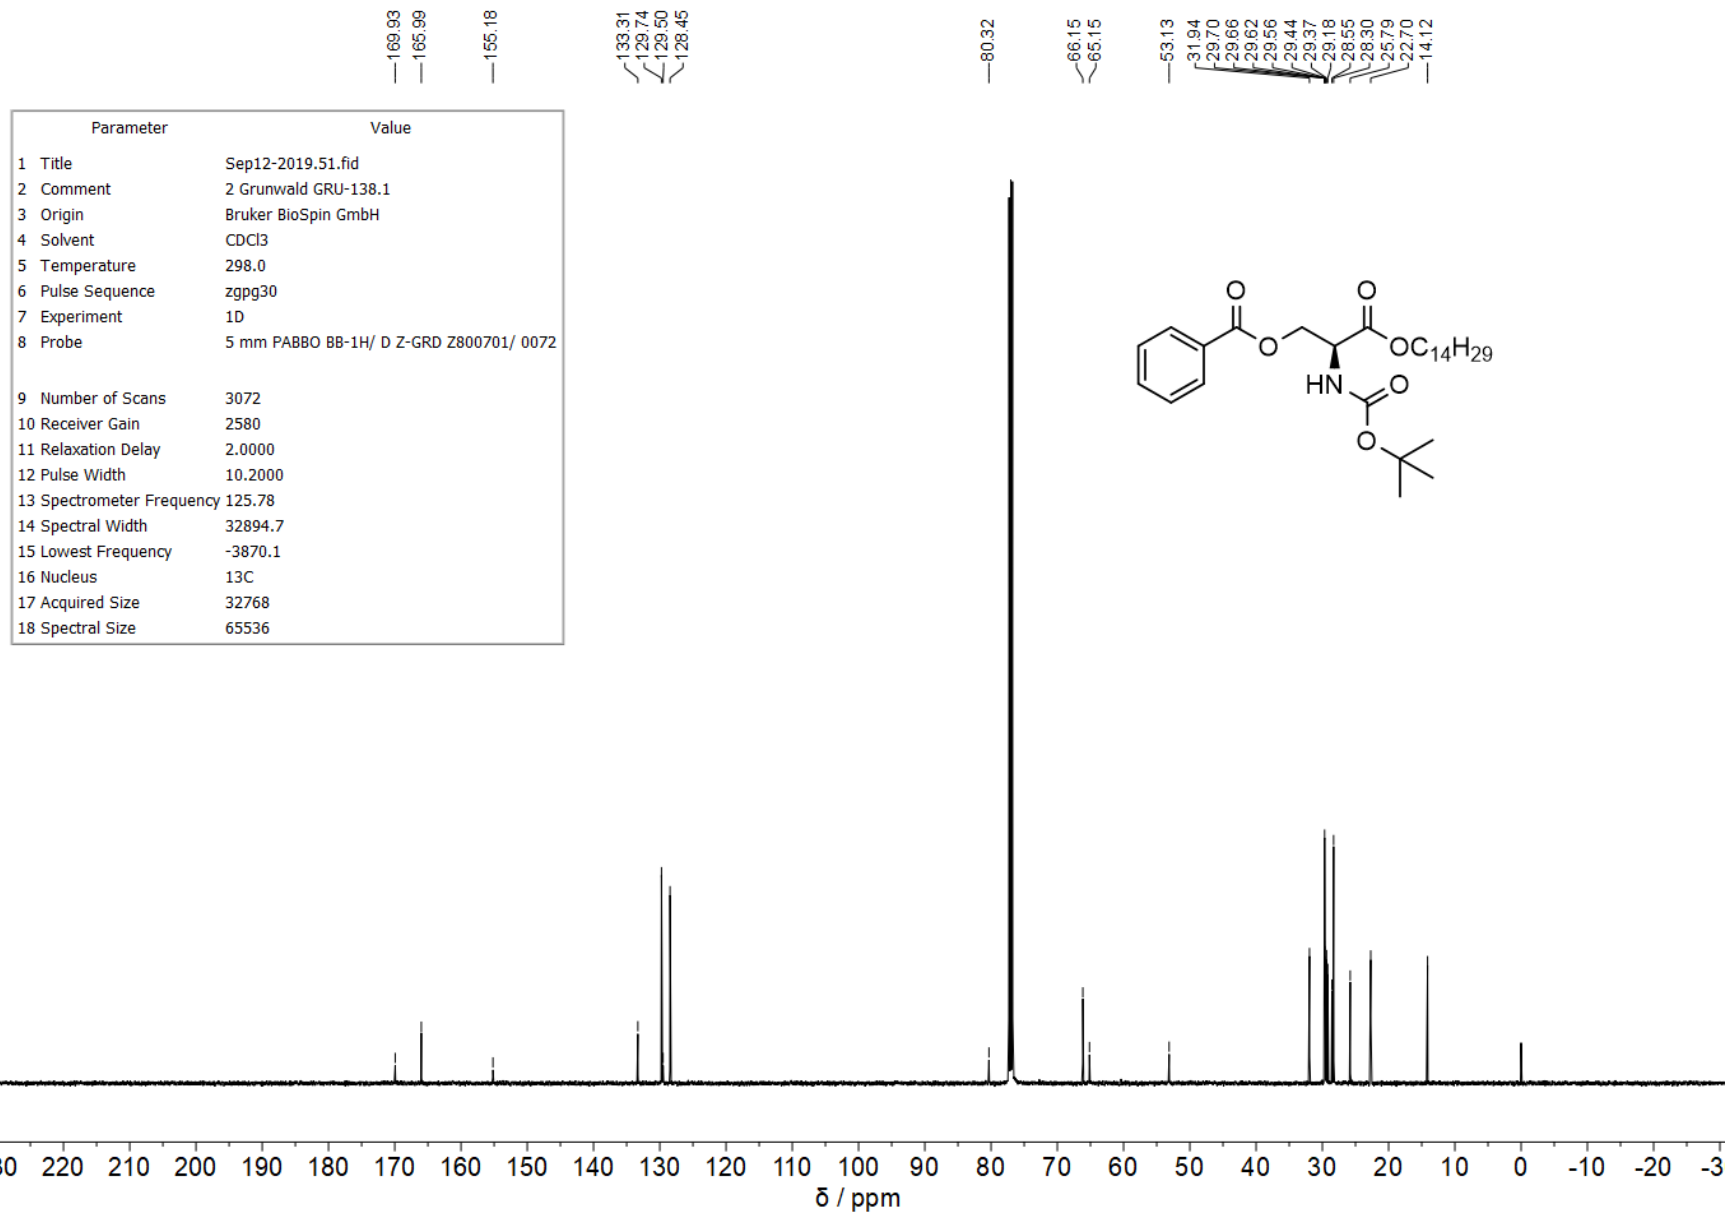

4-C<sub>14</sub>SerC<sub>14</sub>Boc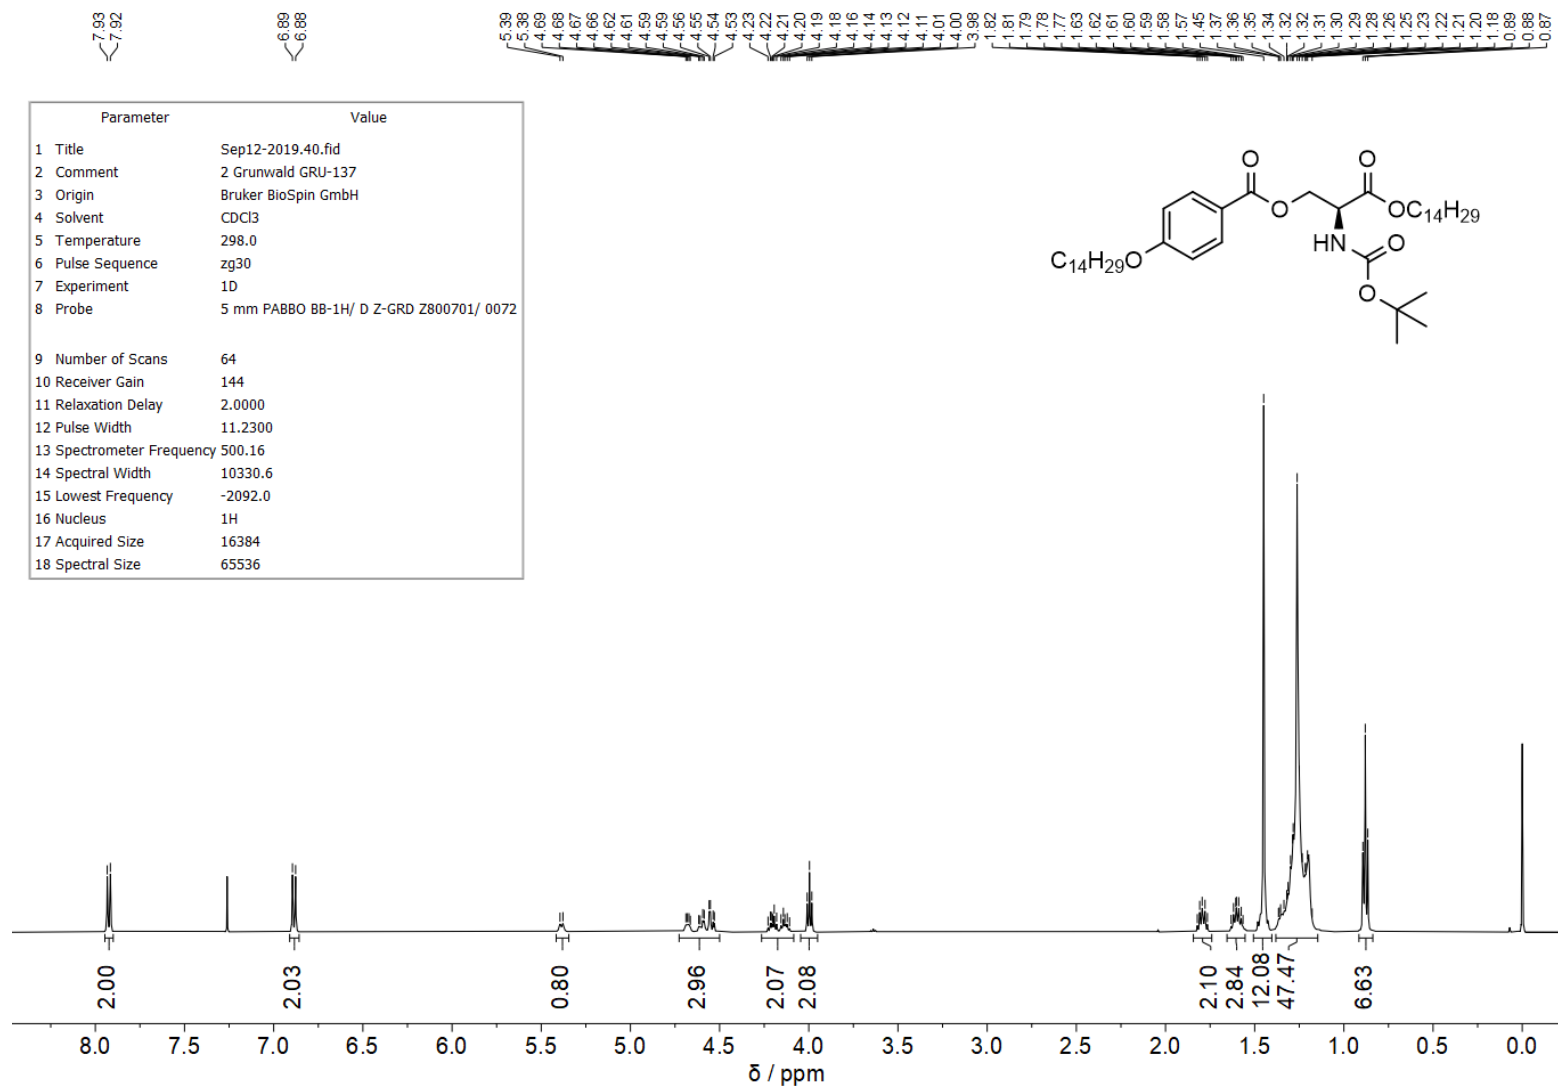

| Parameter                 | Value                                   |
|---------------------------|-----------------------------------------|
| 1 Title                   | Sep12-2019.41.fid                       |
| 2 Comment                 | 2 Grunwald GRU-137                      |
| 3 Origin                  | Bruker BioSpin GmbH                     |
| 4 Solvent                 | CDCl3                                   |
| 5 Temperature             | 300.0                                   |
| 6 Pulse Sequence          | zgpg30                                  |
| 7 Experiment              | 1D                                      |
| 8 Probe                   | 5 mm PABBO BB-1H/ D Z-GRD Z800701/ 0072 |
| 9 Number of Scans         | 3072                                    |
| 10 Receiver Gain          | 2580                                    |
| 11 Relaxation Delay       | 2.0000                                  |
| 12 Pulse Width            | 10.2000                                 |
| 13 Spectrometer Frequency | 125.78                                  |
| 14 Spectral Width         | 32894.7                                 |
| 15 Lowest Frequency       | -3870.3                                 |
| 16 Nucleus                | 13C                                     |
| 17 Acquired Size          | 32768                                   |
| 18 Spectral Size          | 65536                                   |

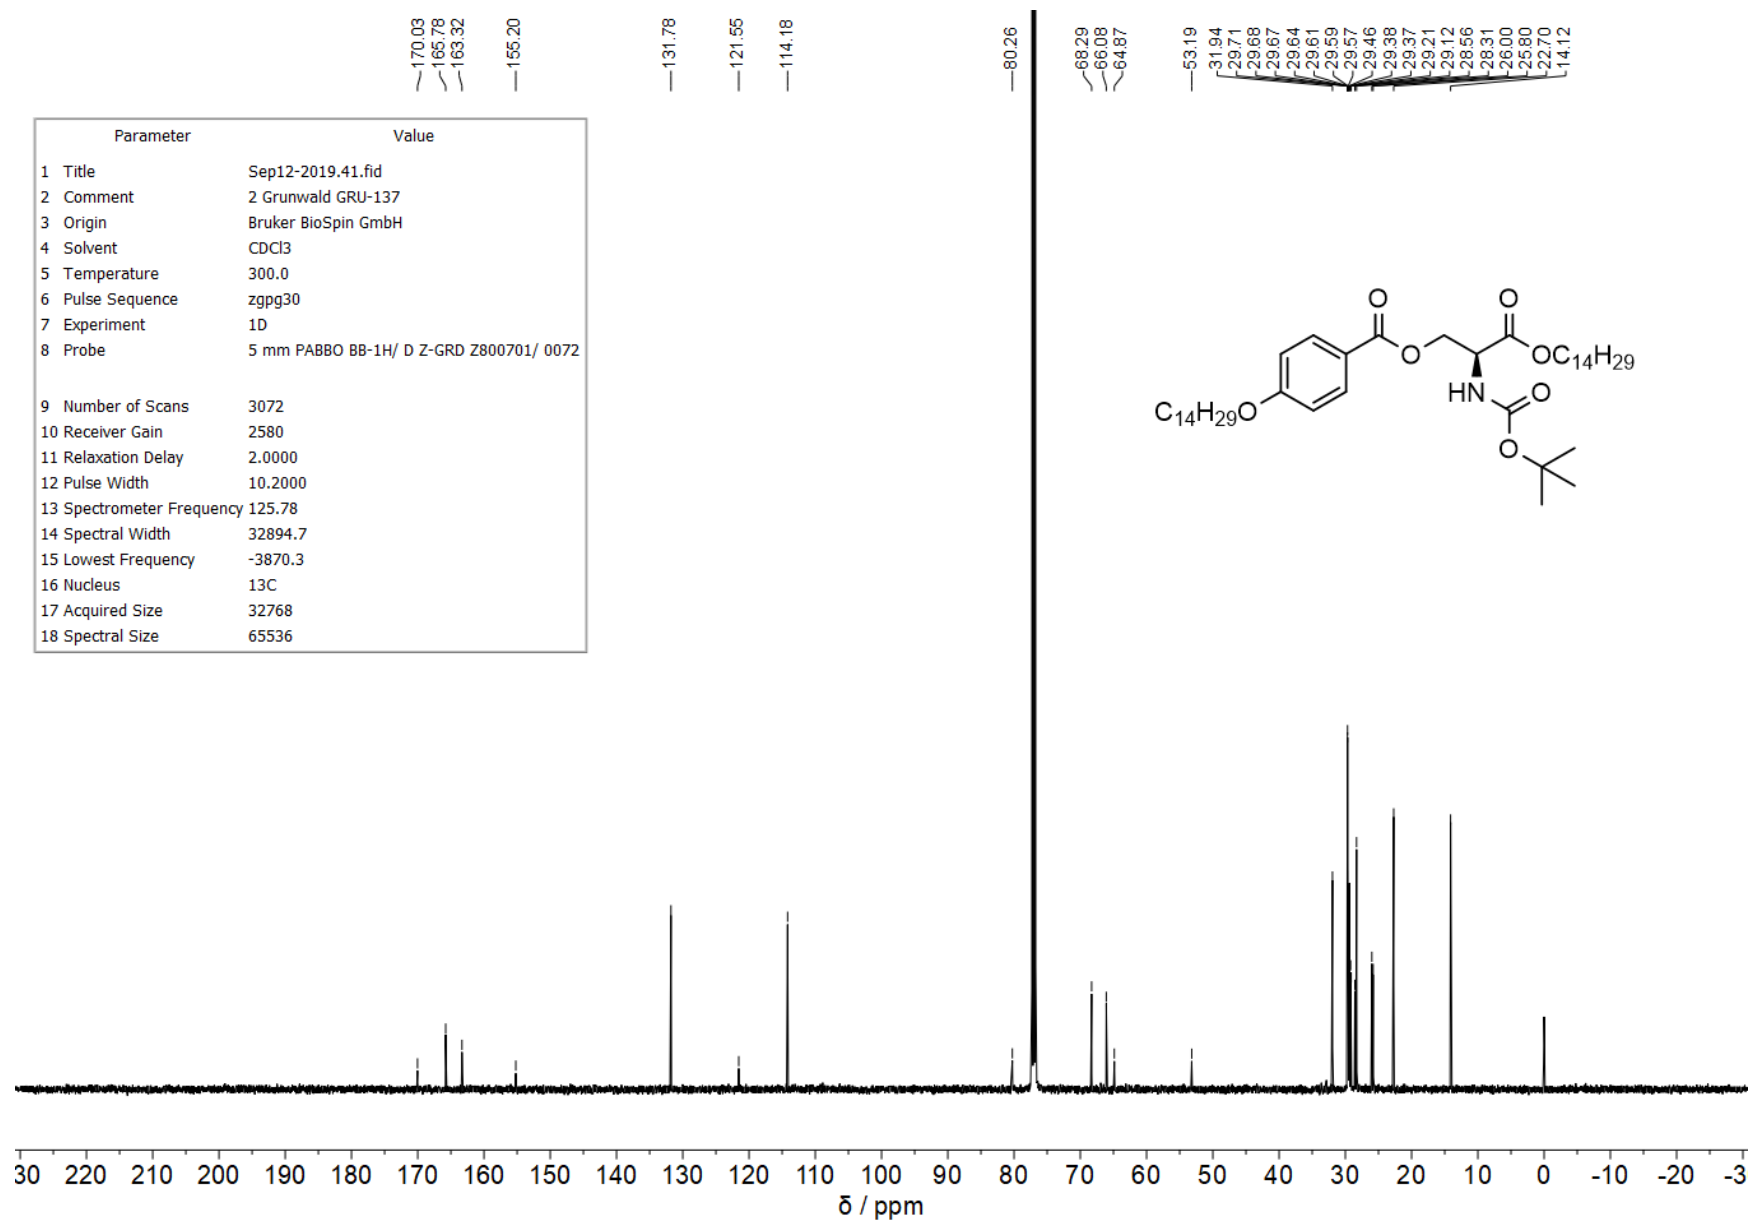

170.03  
165.78  
163.32  
155.20  
131.78  
121.55  
114.18  
80.26  
68.29  
66.08  
64.87  
53.19  
31.94  
29.71  
29.68  
29.67  
29.64  
29.61  
29.59  
29.57  
29.46  
29.38  
29.37  
29.21  
29.12  
28.56  
28.31  
26.00  
25.80  
22.70  
14.12

3,4-C<sub>14</sub>SerC<sub>14</sub>Boc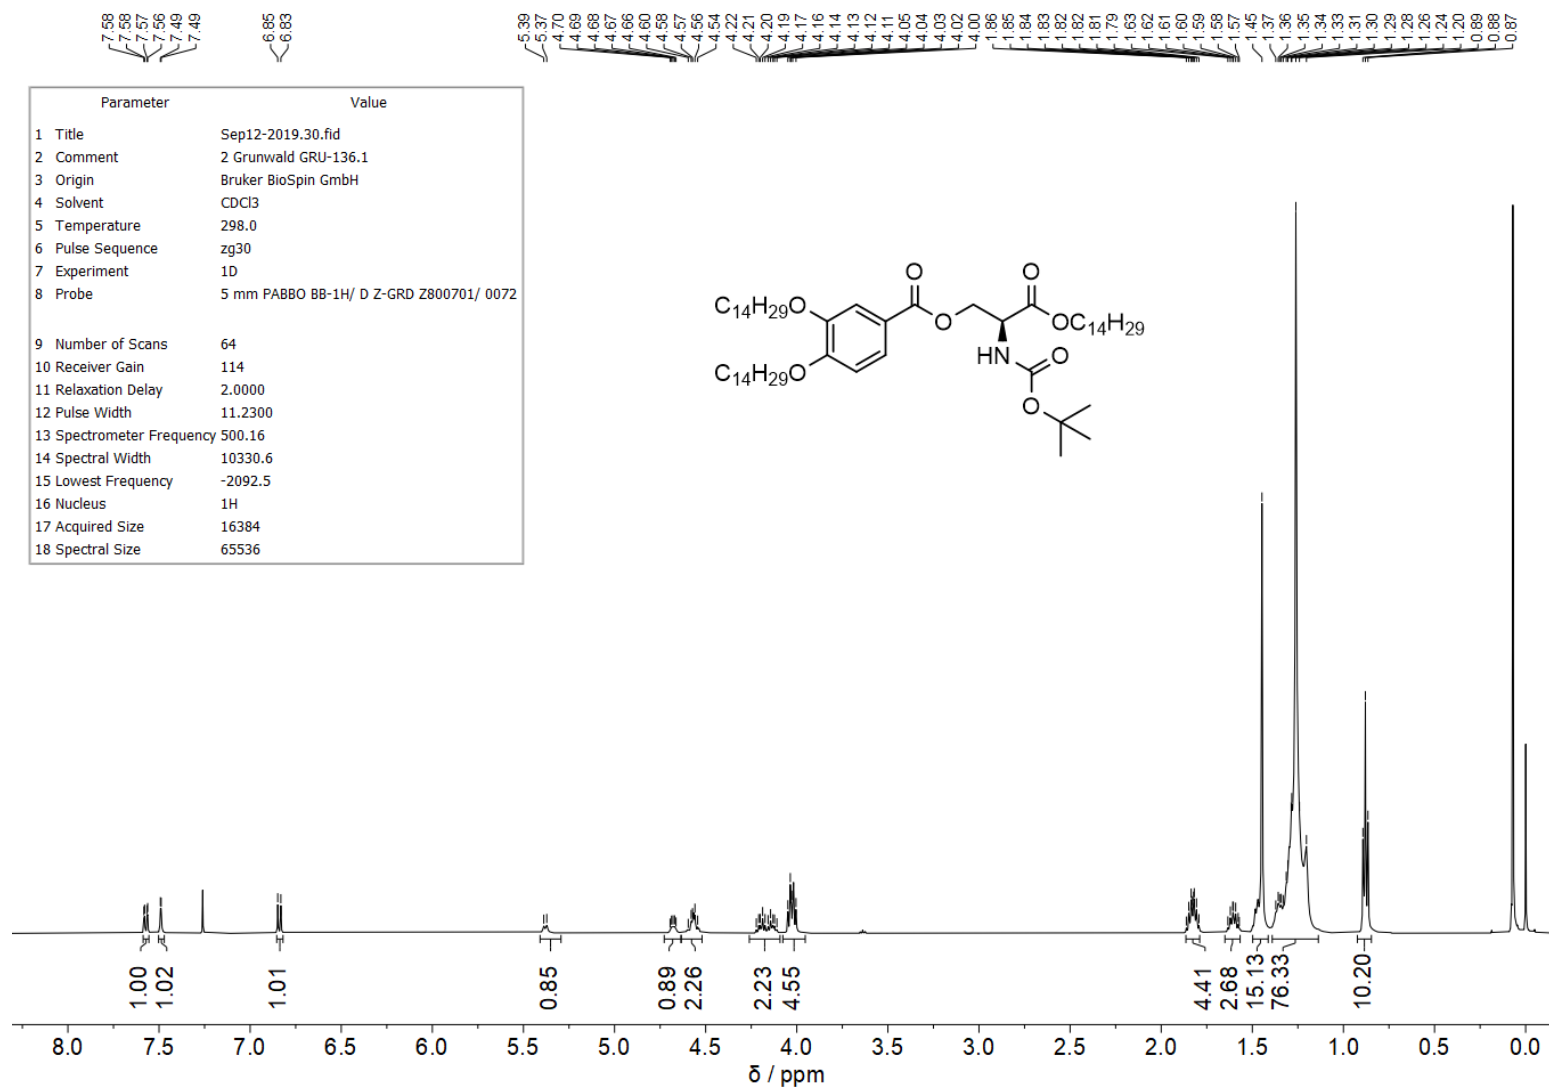

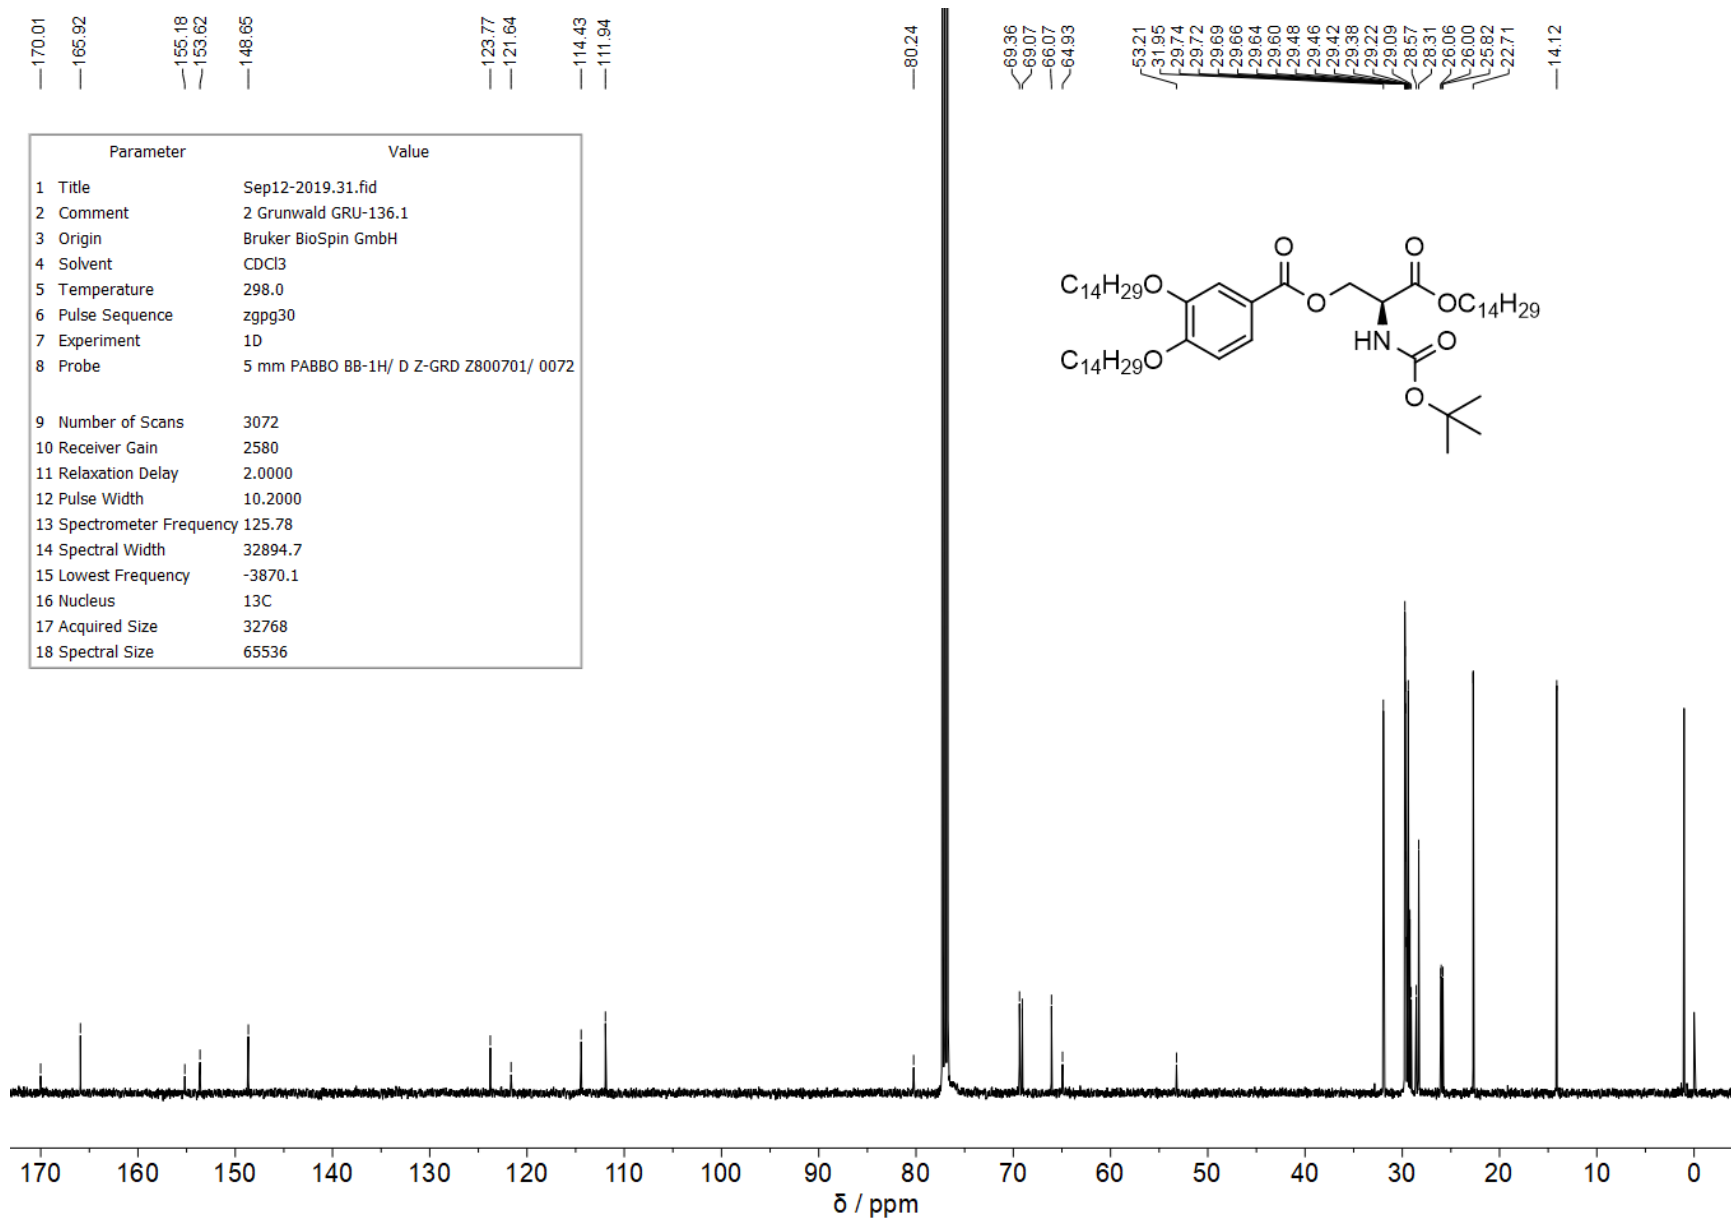

3,4,5-C<sub>14</sub>SerC<sub>14</sub>Boc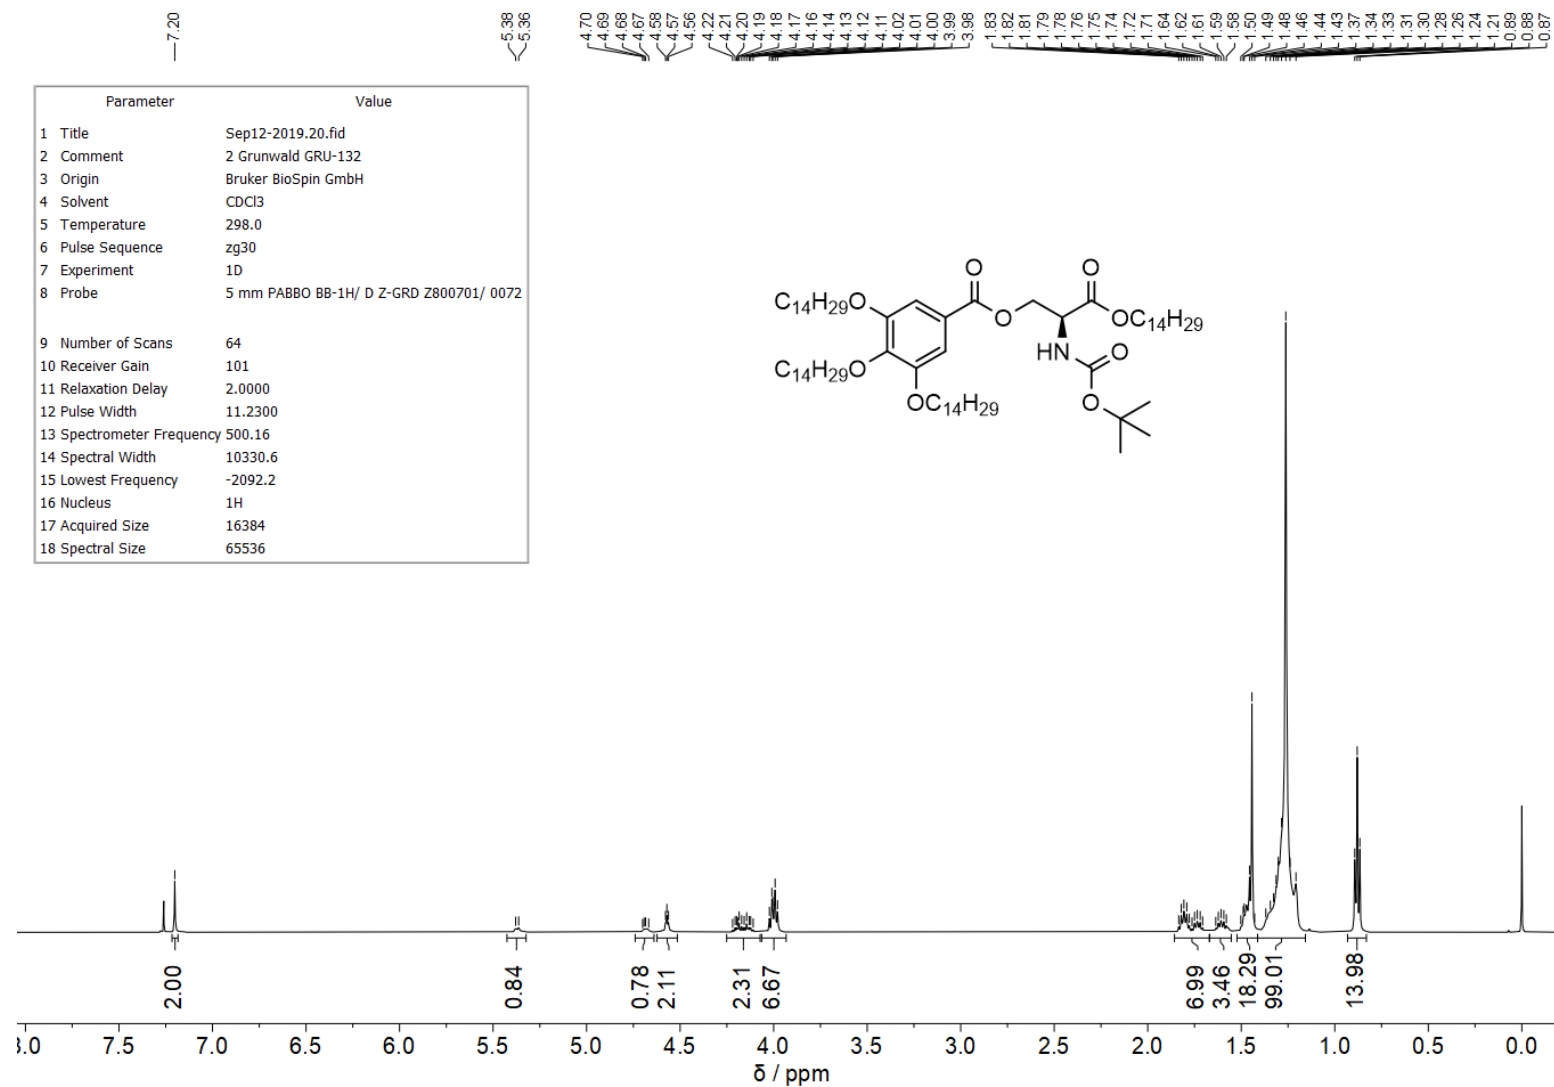

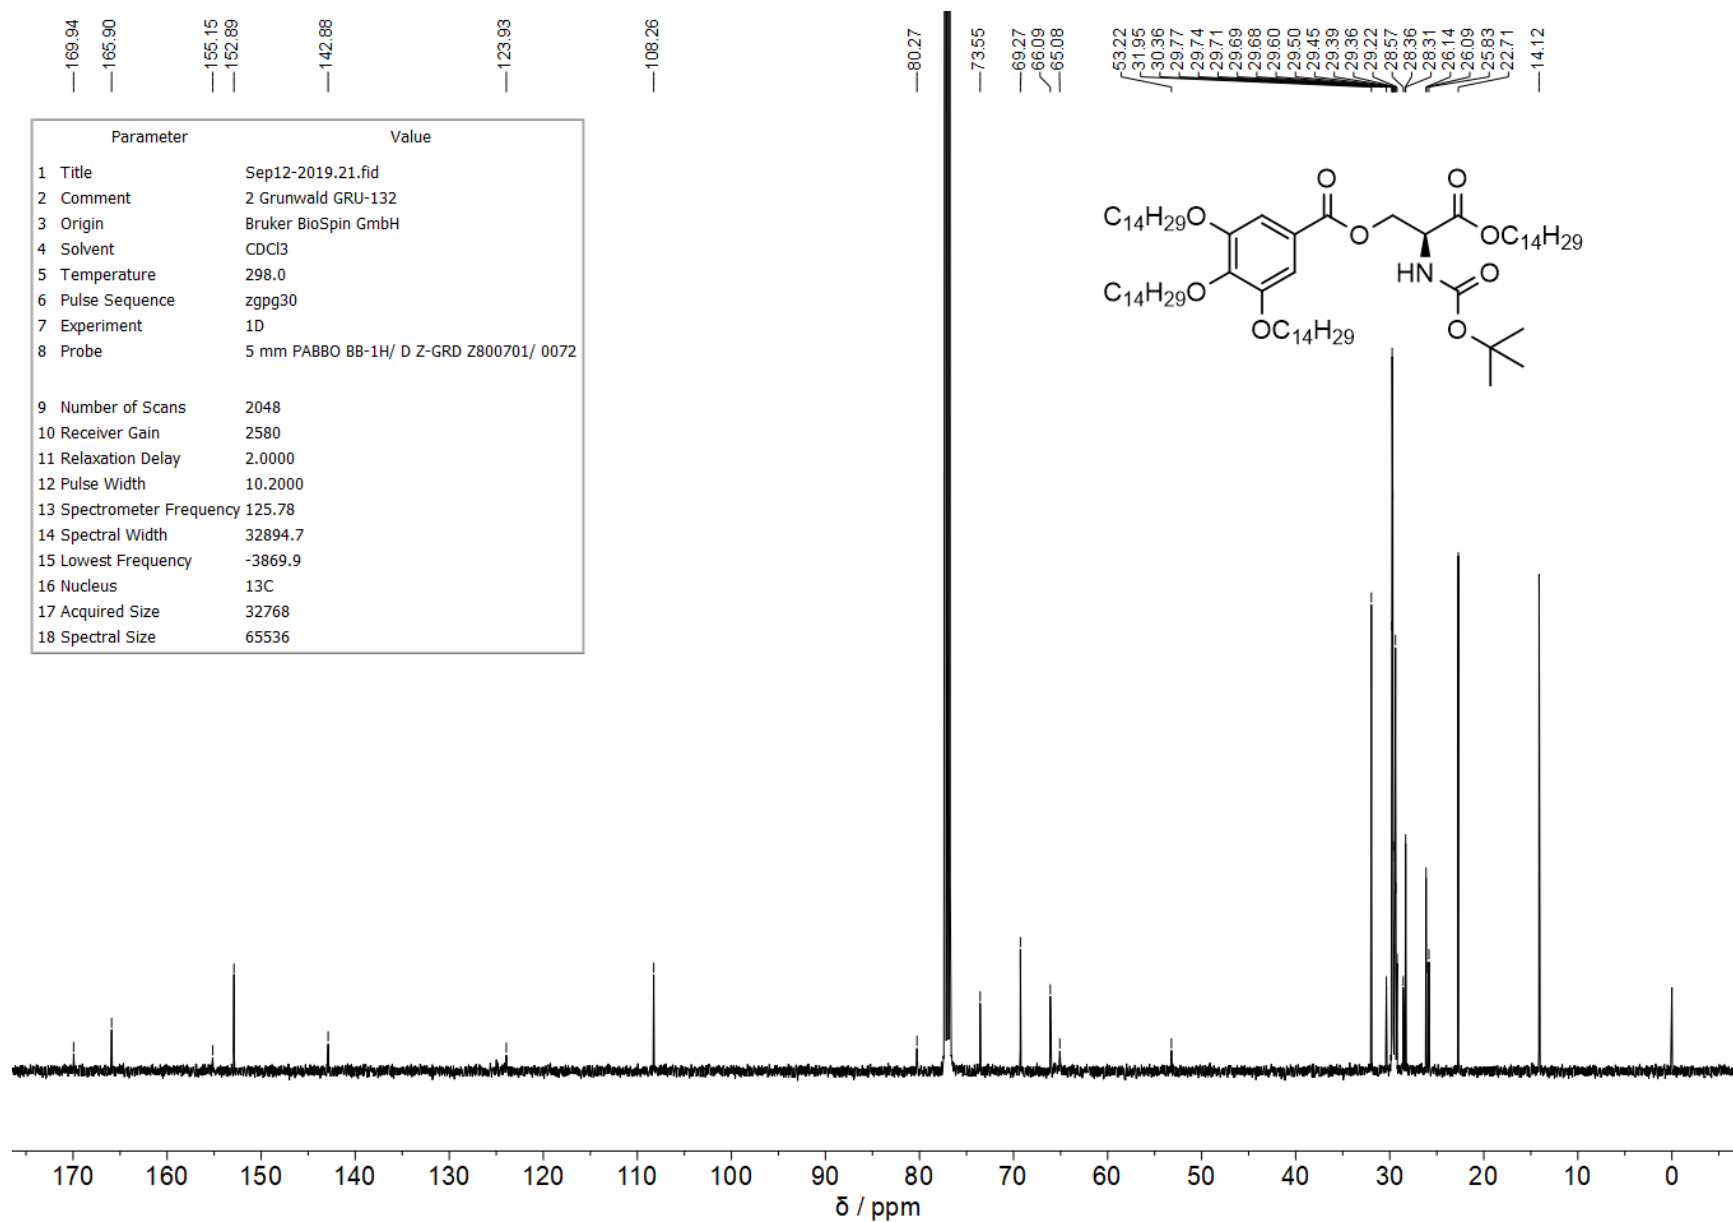

## BzSerC14NH2

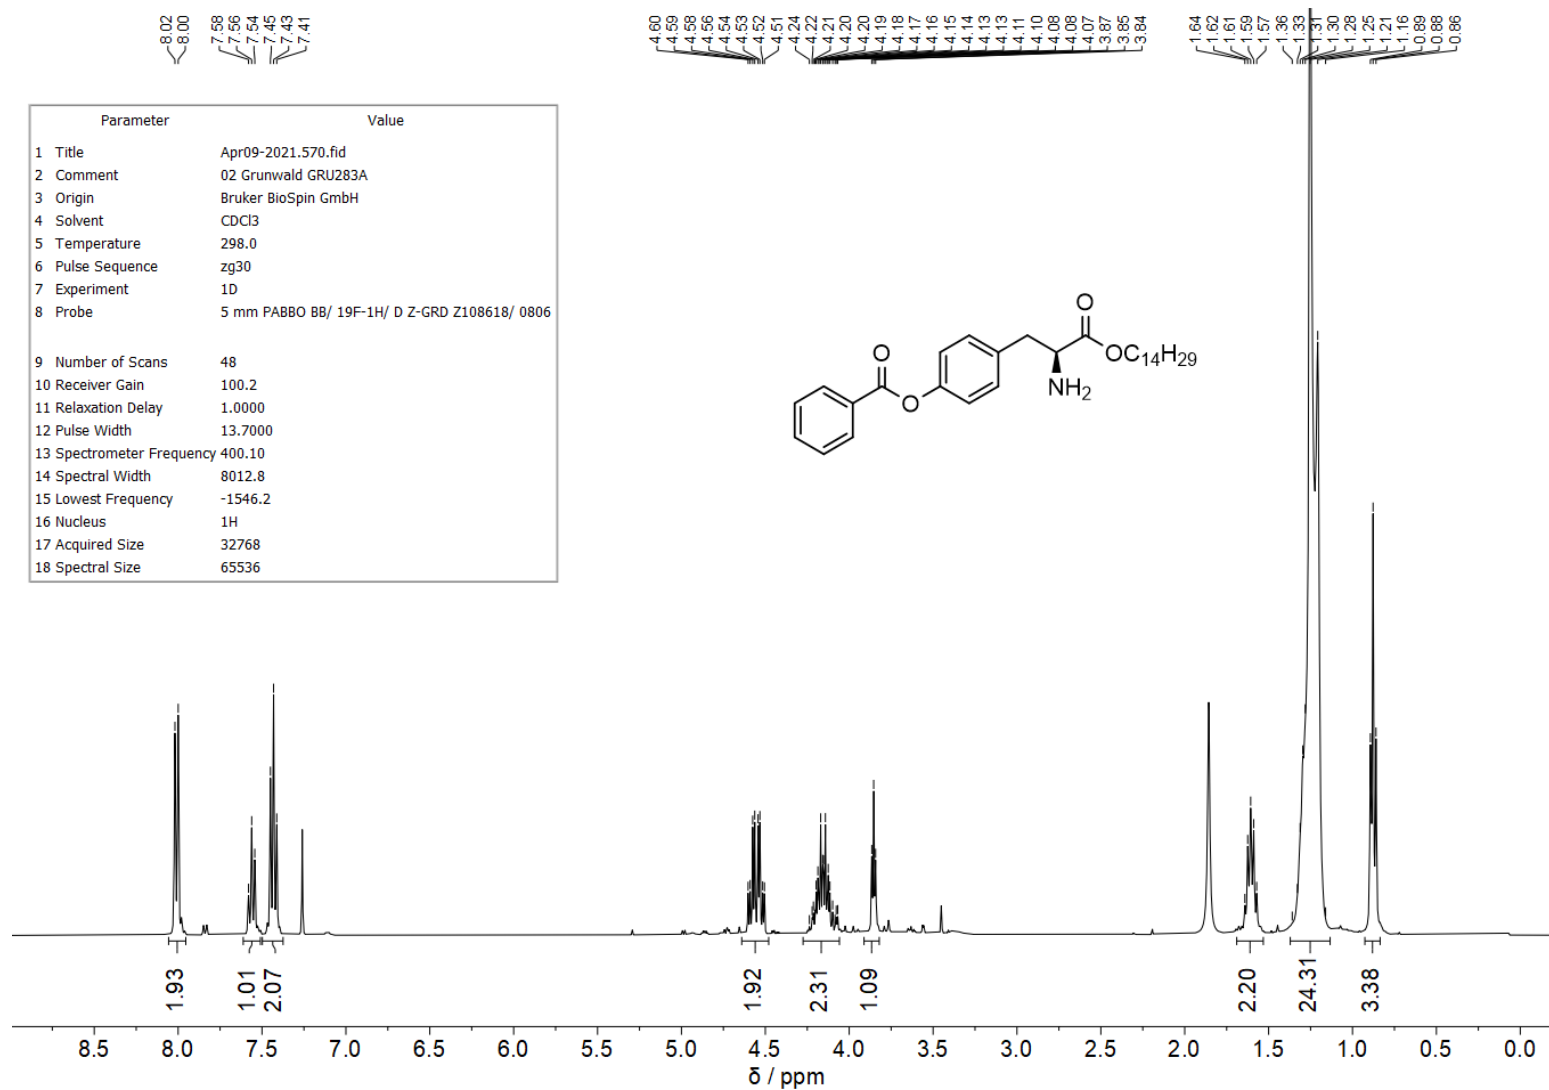



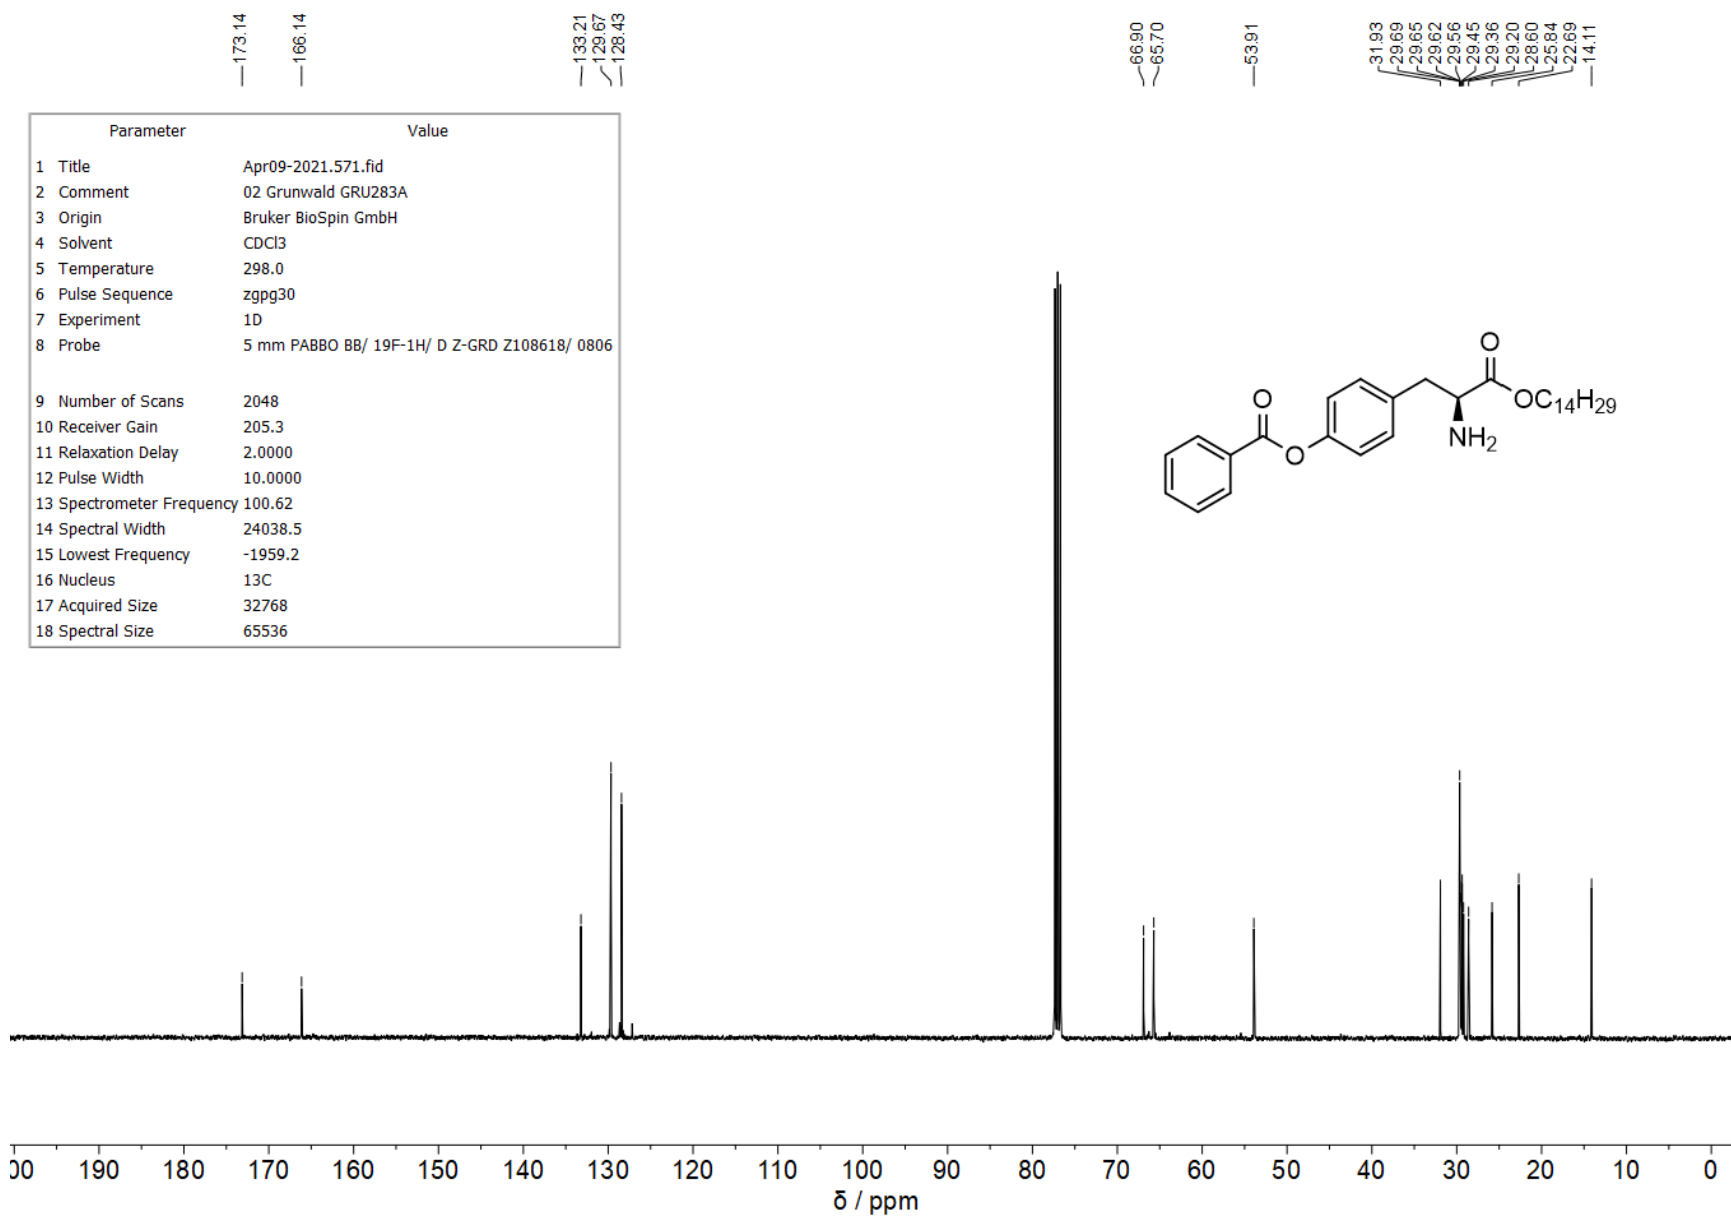

| Parameter                 | Value                                        |
|---------------------------|----------------------------------------------|
| 1 Title                   | Apr09-2021.571.fid                           |
| 2 Comment                 | 02 Grunwald GRU283A                          |
| 3 Origin                  | Bruker BioSpin GmbH                          |
| 4 Solvent                 | CDCl3                                        |
| 5 Temperature             | 298.0                                        |
| 6 Pulse Sequence          | zgpg30                                       |
| 7 Experiment              | 1D                                           |
| 8 Probe                   | 5 mm PABBO BB/ 19F-1H/ D Z-GRD Z108618/ 0806 |
| 9 Number of Scans         | 2048                                         |
| 10 Receiver Gain          | 205.3                                        |
| 11 Relaxation Delay       | 2.0000                                       |
| 12 Pulse Width            | 10.0000                                      |
| 13 Spectrometer Frequency | 100.62                                       |
| 14 Spectral Width         | 24038.5                                      |
| 15 Lowest Frequency       | -1959.2                                      |
| 16 Nucleus                | 13C                                          |
| 17 Acquired Size          | 32768                                        |
| 18 Spectral Size          | 65536                                        |

ElimSerC<sub>14</sub>Cl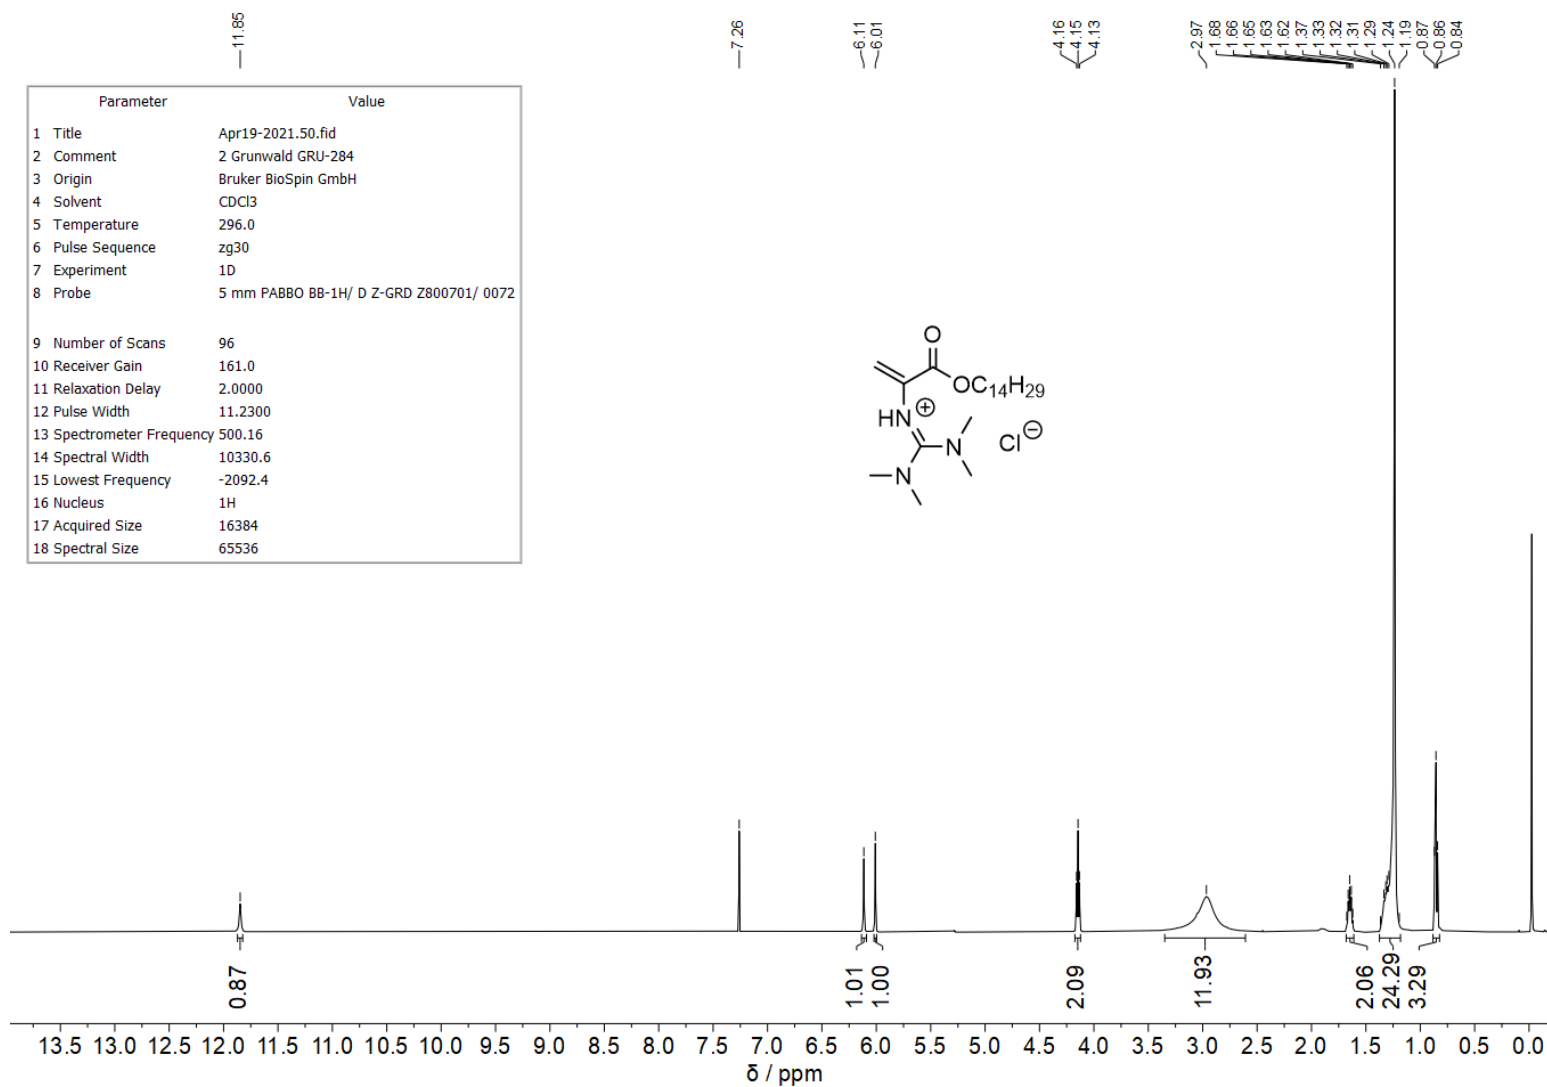

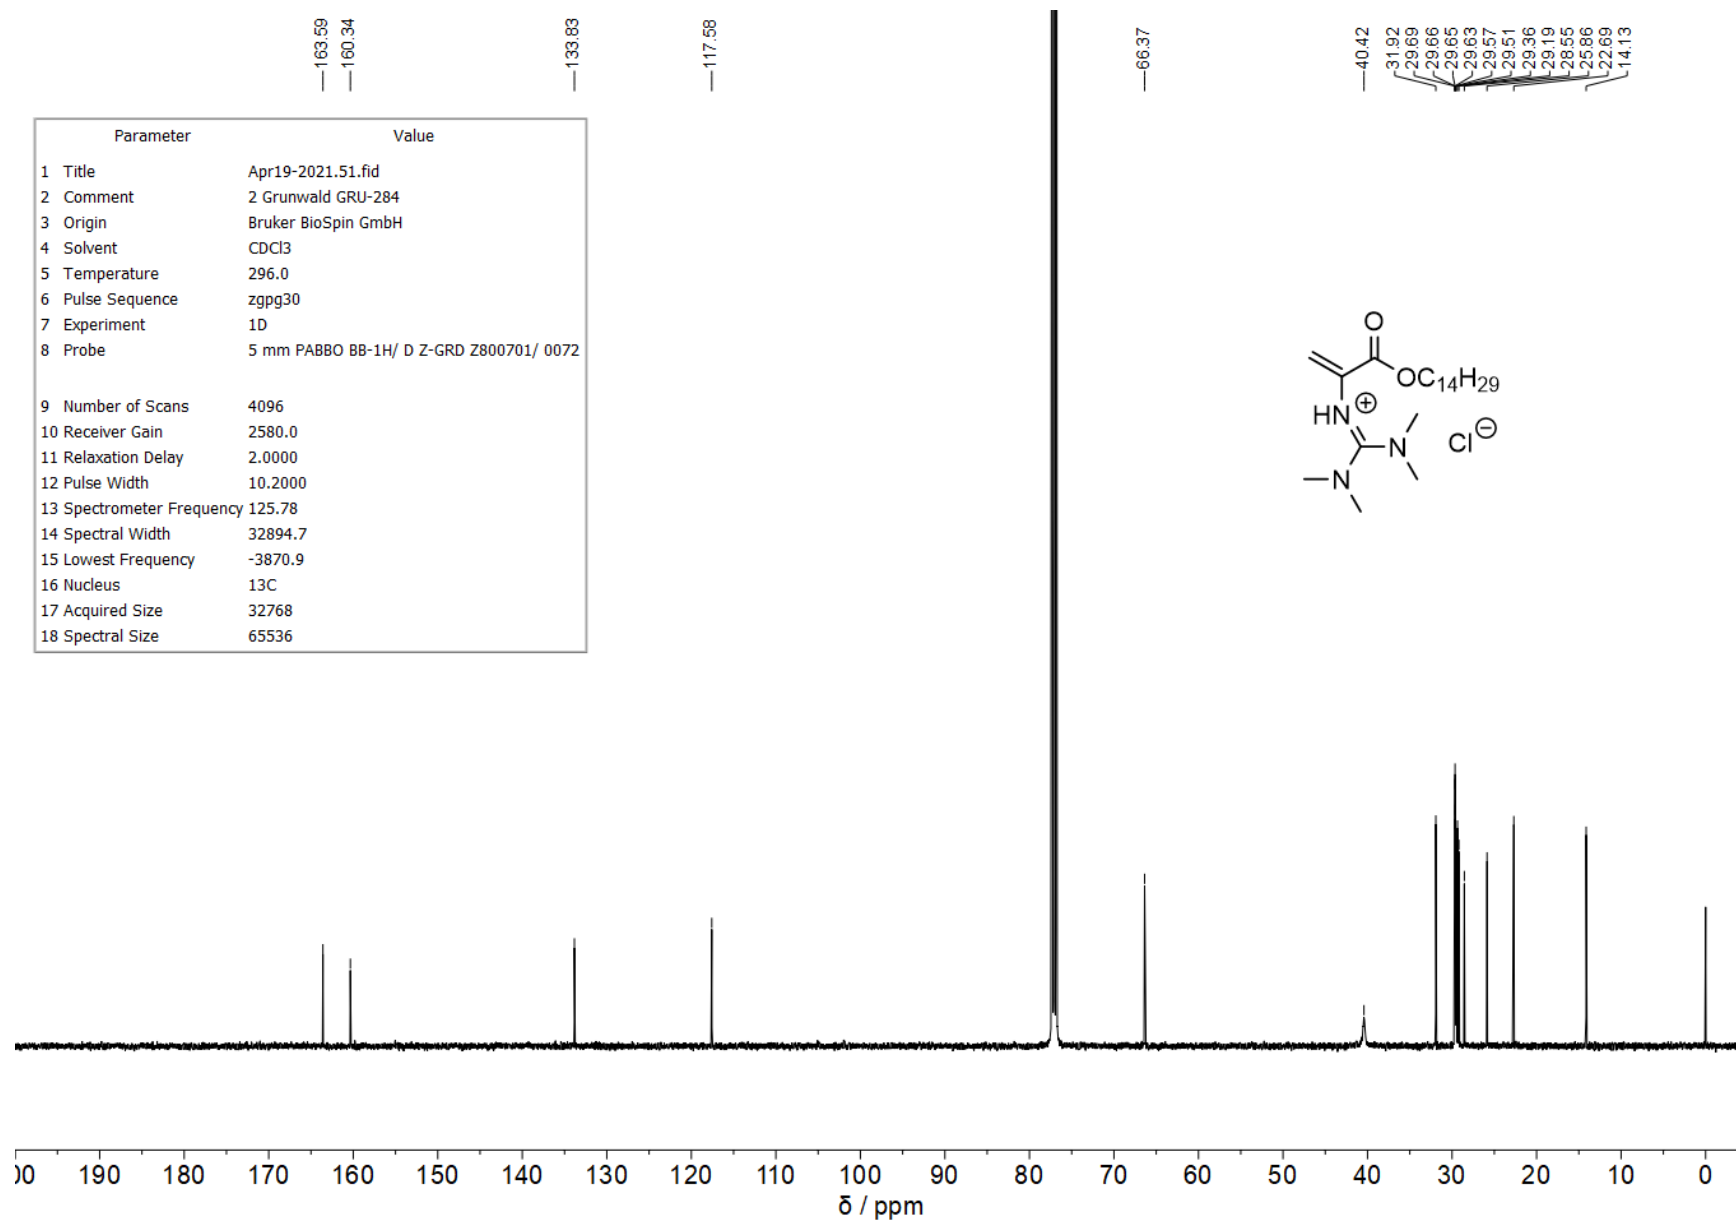

Supplement: d3cp00485f1.pdf [file d3cp00485f1.pdf]
